# Supplementary material for: Single-Cell RNA-Seq Reveals a Crosstalk between Hyaluronan Receptor LYVE-1-Expressing Macrophages and Vascular Smooth Muscle Cells
Source: MDPI journal article supplement (doi:10.3390/cells11030411), 2022-01-25
Supplement: s1 [file s1]

Manuscript Supplementary  
Figure S1.

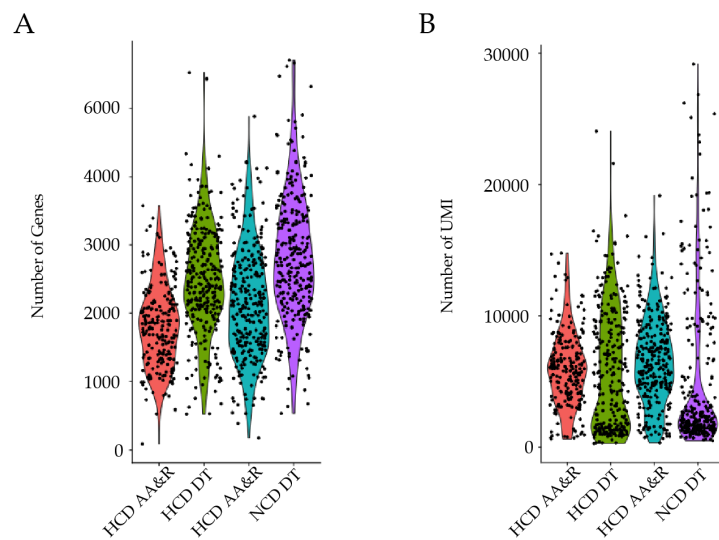

**Figure S1.** Quality control of the profiled scRNAseq transcriptomes of CD45<sup>+</sup> cells derived from atherosclerosis-prone AA&R, and atherosclerosis-resistant DT aorta of *Apoe*<sup>-/-</sup> mice on NCD and HCD. (A) Violin plots showing the quality control metrics of (A) number of genes detected; (B) number of Unique molecular identifiers (UMI) n=6 mice.

Figure S2.

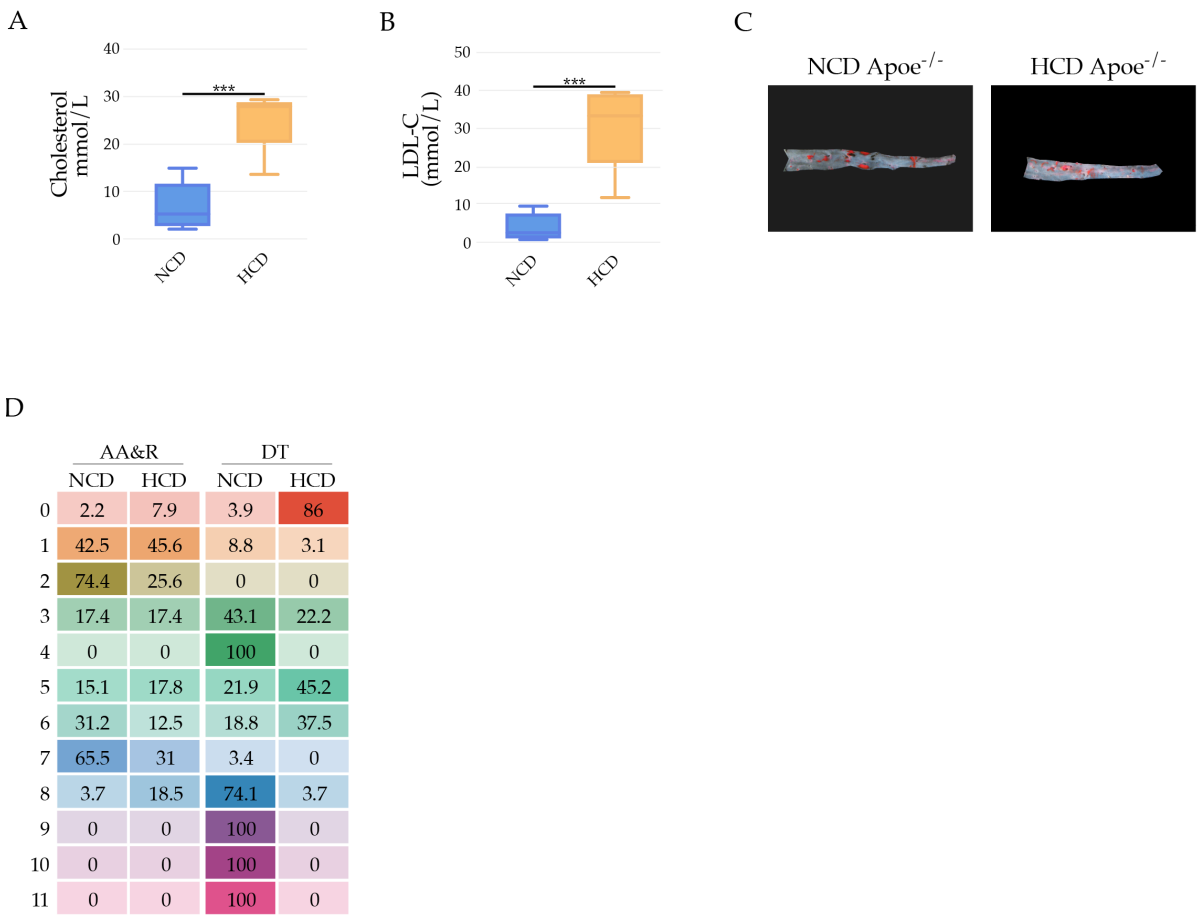

**Figure S2.** Bar graphs represent the mean  $\pm$  SEM (A) cholesterol; (B) LDL-C,  $n=6$  mice/group, and \*\*\* $p < 0.001$ . (C) Representative images of Oil Red O stained abdominal aorta of *Apoe*<sup>-/-</sup> on NCD and HCD. (D) Relative frequency of cells derived from AA&R and DT aorta of *Apoe*<sup>-/-</sup> mice on NCD and HCD composing the 12 clusters.

Figure S3

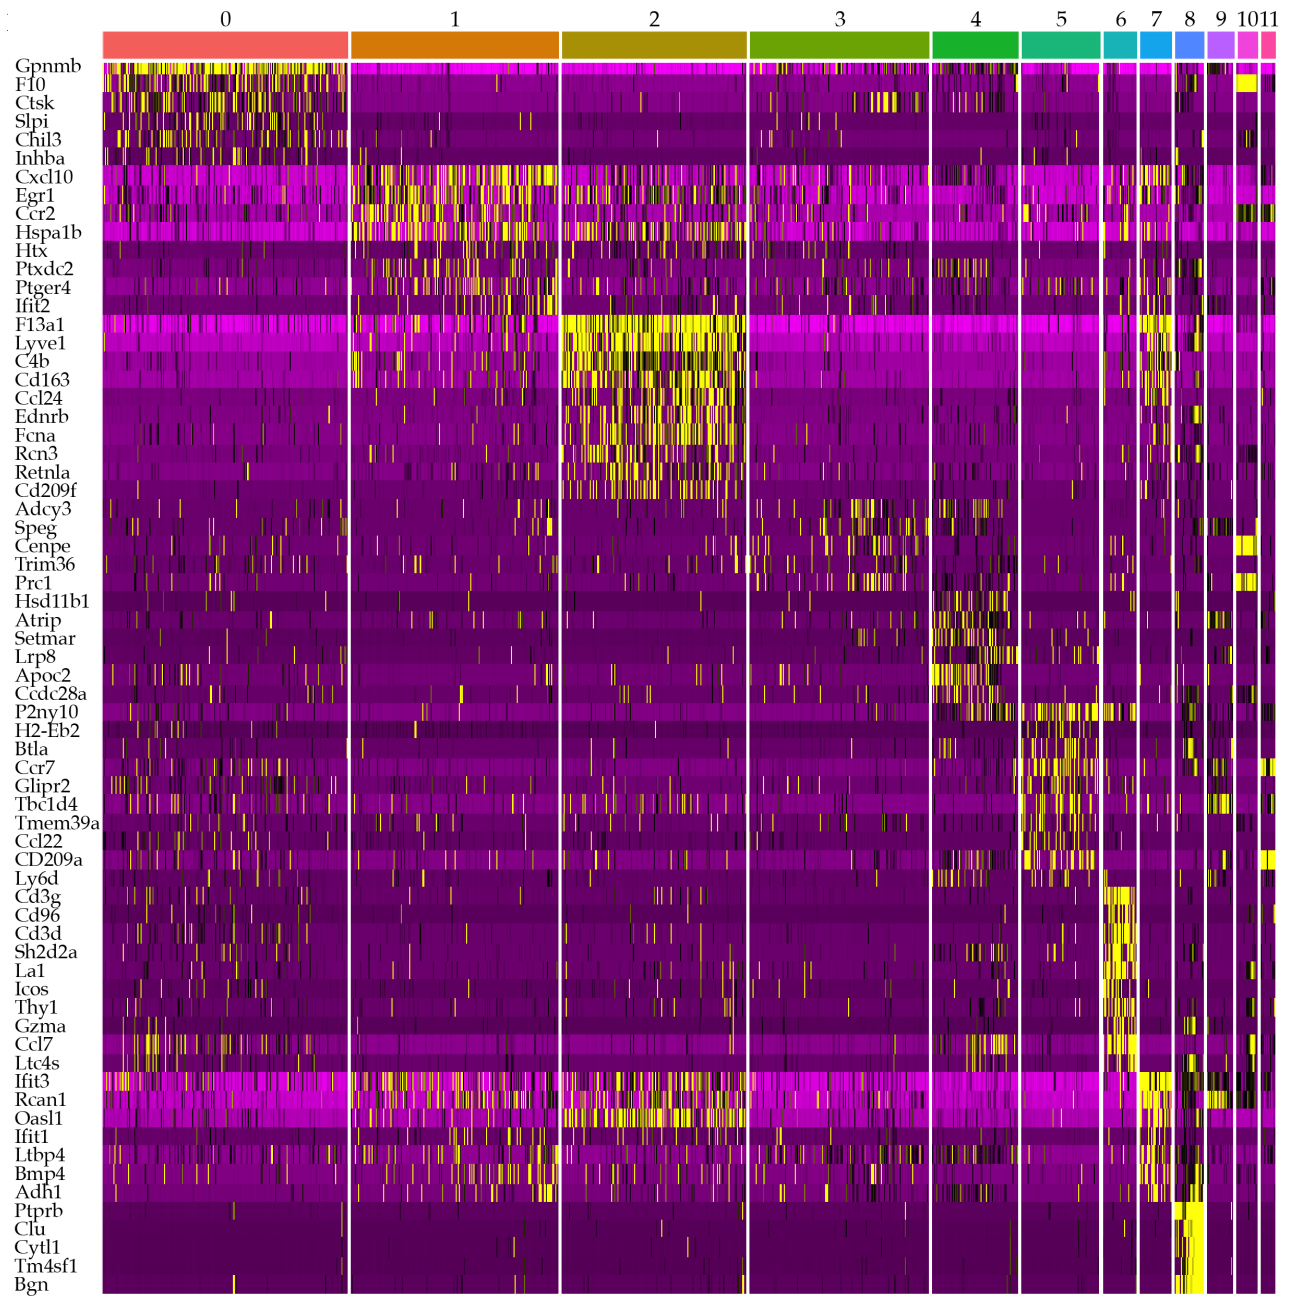

**Figure S3.** Heat map of top differentially expressed genes among all detected 12 clusters.

Figure S4

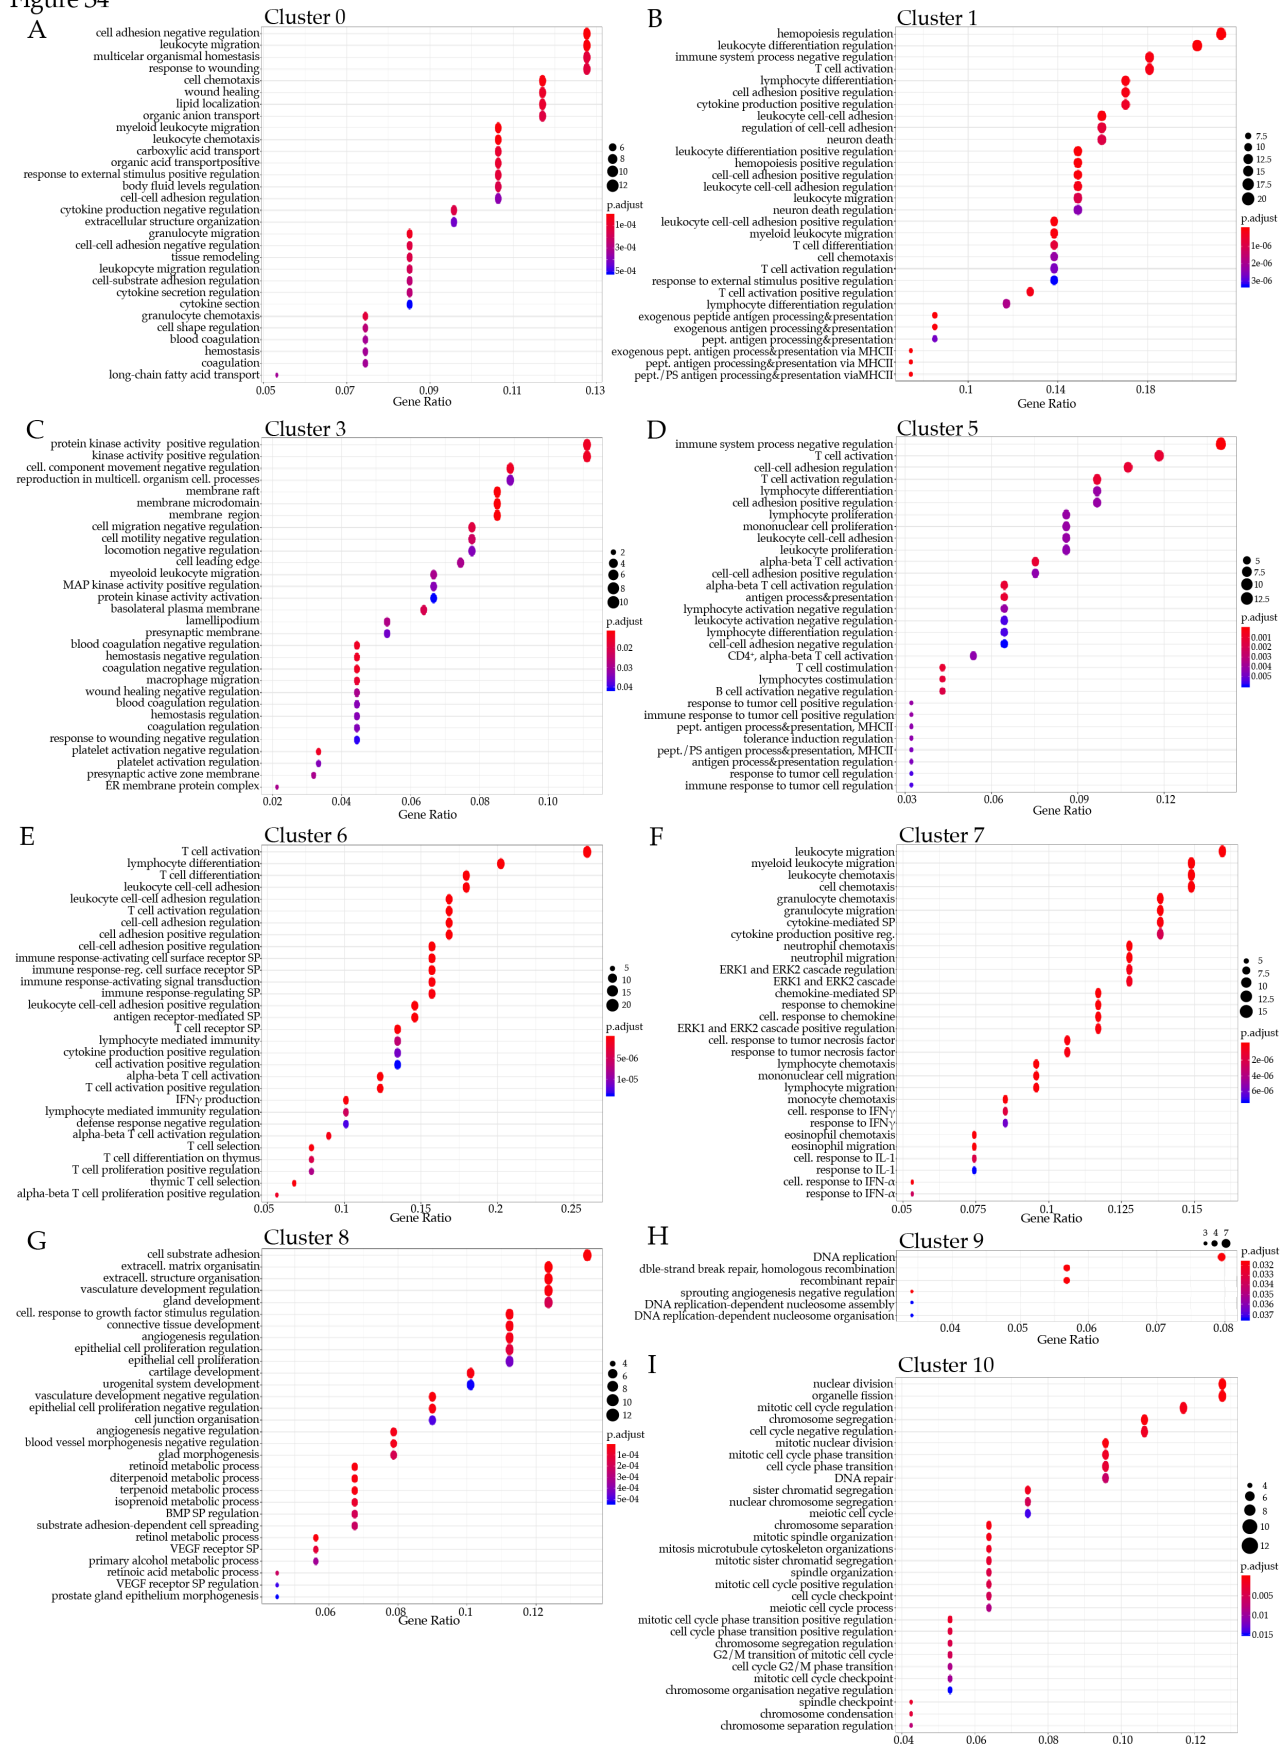

**Figure S4.** GO terms enrichment analysis of AA&R and DT aorta derived clusters of *Apoe*<sup>-/-</sup> on NCD and HCD. Bubble plot of selected GO terms enrichment analysis of: (A) cluster 0; (B) cluster 1; (C) cluster 3, (D) cluster 5, (E) cluster 6; (F) cluster 7; (G) cluster 8, (H) cluster 9 and (I) cluster 10. Dot

size is proportional to the number of genes overlapping with each GO term, and the adjusted  $p$ -value is colour-coded from red to blue.

Figure S5.

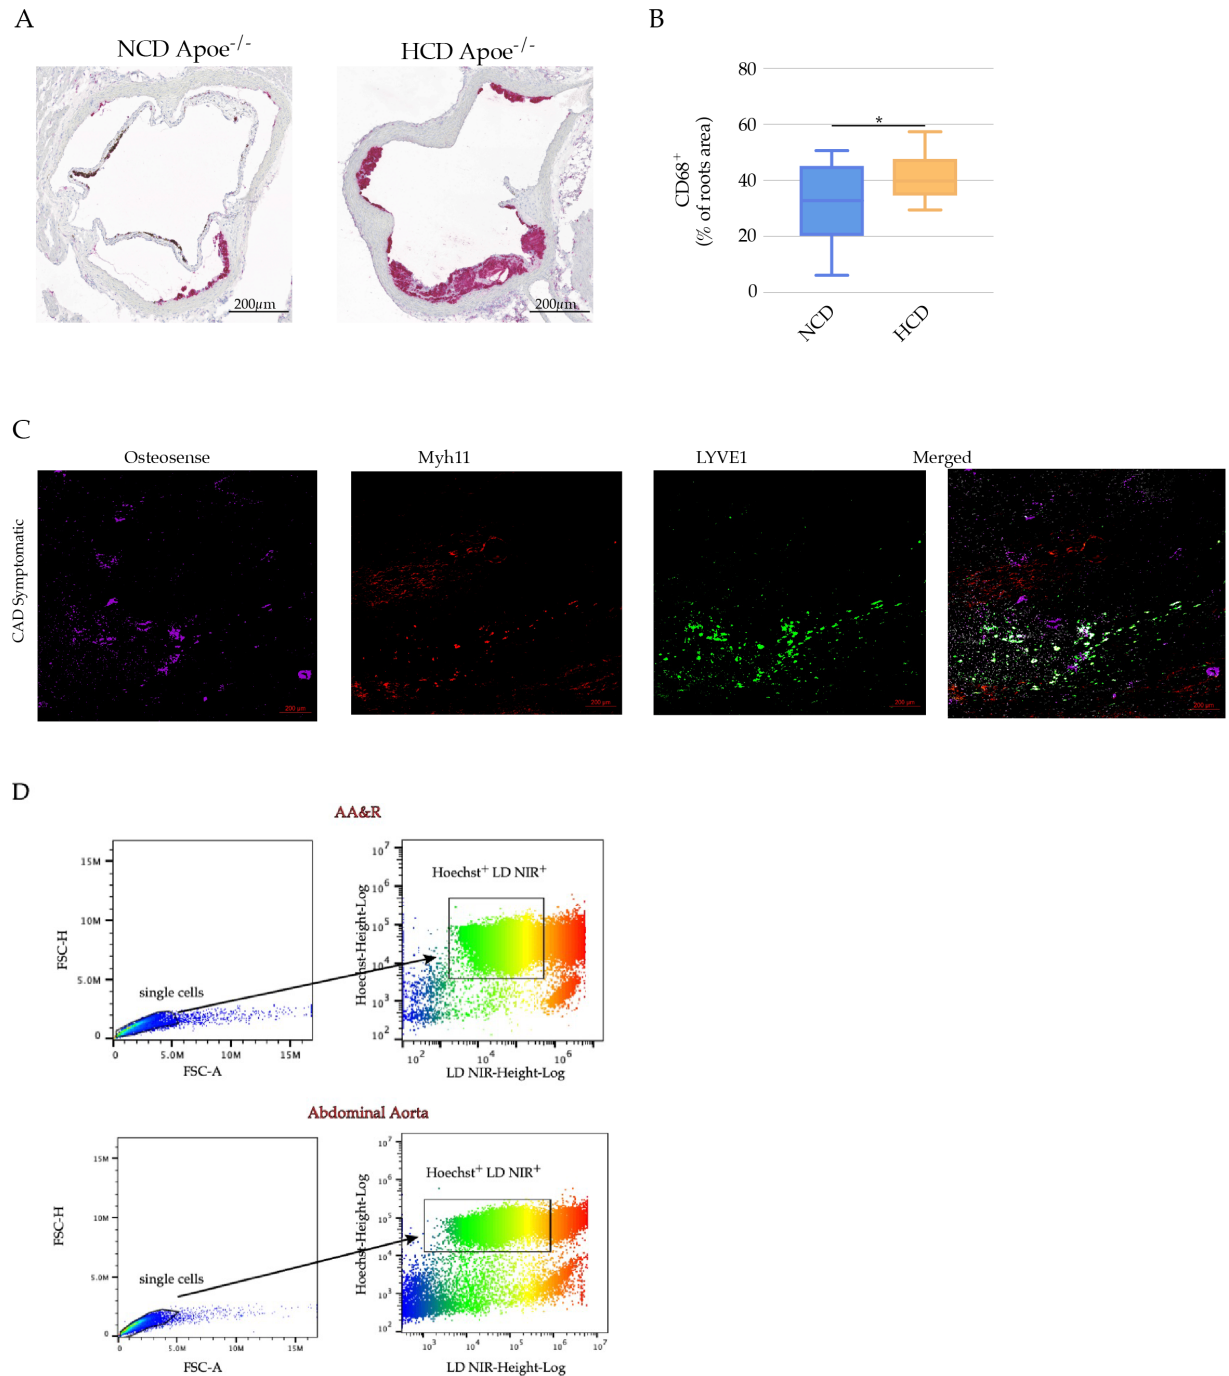

**Figure S5.** (A) Representative images of CD68 positive cells-stained aortic roots of *Apoe*<sup>-/-</sup> on NCD and HCD. (B) Bar graphs represent the mean  $\pm$  SEM of total CD68 positive cells in aortic roots of *Apoe*<sup>-/-</sup> on NCD and HCD,  $n=6$  mice per group and  $*p < 0.05$ . (C) Representative immunofluorescence staining showing LYVE1 (green) expression in close proximity to VSMC (Myh11 positive staining in red) in

atherosclerotic lesions in areas of microcalcification as indicated by Osteosense positive staining (purple) in symptomatic CAD patients. (D) Dotplots showing exclusion of doublets and LIVE/DEAD Fixable Near-IR Dead Cell Dye positive cells and selection of Hoechst cells in the aortic arch and root and abdominal aorta, before gating for markers of interest.

**Supplementary Table S1**

| log fold-chage of the average expression | Adjusted p-value | p-value  | CLUSTER | GENE     |
|------------------------------------------|------------------|----------|---------|----------|
| 1.716791367                              | 1.18E-75         | 8.86E-80 | 0       | Gpnmb    |
| 1.227479102                              | 7.01E-61         | 5.25E-65 | 0       | Spp1     |
| 0.848934922                              | 2.86E-58         | 2.15E-62 | 0       | Cstb     |
| 1.655057308                              | 7.01E-58         | 5.25E-62 | 0       | Fabp5    |
| 1.974309986                              | 1.85E-56         | 1.38E-60 | 0       | F7       |
| 1.708285942                              | 6.50E-50         | 4.86E-54 | 0       | Atp6v0d2 |
| 0.638836422                              | 2.61E-48         | 1.96E-52 | 0       | Ctsd     |
| -0.420116227                             | 9.94E-48         | 7.44E-52 | 0       | Rn45s    |
| 1.312684434                              | 3.89E-47         | 2.92E-51 | 0       | Syngn1   |
| 1.118417206                              | 1.29E-46         | 9.66E-51 | 0       | Ctsl     |
| 1.230221854                              | 2.33E-46         | 1.74E-50 | 0       | Lhfp12   |
| -1.550659201                             | 3.35E-46         | 2.51E-50 | 0       | Tmem176b |
| 0.731842988                              | 3.34E-44         | 2.51E-48 | 0       | Plin2    |
| 0.611555392                              | 4.96E-43         | 3.72E-47 | 0       | Lgals3   |
| 0.912953025                              | 1.61E-41         | 1.20E-45 | 0       | Gngt2    |
| 1.816545861                              | 8.20E-39         | 6.14E-43 | 0       | F10      |
| 1.506373525                              | 3.01E-38         | 2.26E-42 | 0       | Ctsk     |
| 1.187008737                              | 4.71E-38         | 3.53E-42 | 0       | Msrb1    |
| 0.696648955                              | 5.78E-38         | 4.33E-42 | 0       | Cd63     |
| -1.397175818                             | 3.40E-37         | 2.54E-41 | 0       | Cd81     |
| 0.491612993                              | 7.71E-37         | 5.77E-41 | 0       | Cyba     |
| 0.923495847                              | 4.91E-35         | 3.67E-39 | 0       | Emp1     |
| 0.981596766                              | 2.37E-34         | 1.77E-38 | 0       | Mmp12    |
| 1.073697228                              | 9.38E-34         | 7.02E-38 | 0       | Anpep    |
| 1.606386303                              | 4.07E-33         | 3.05E-37 | 0       | Sgms2    |
| 0.971512387                              | 4.40E-33         | 3.30E-37 | 0       | Wsb2     |
| 1.150208642                              | 5.33E-33         | 3.99E-37 | 0       | Rnf128   |
| 0.982698976                              | 7.72E-33         | 5.78E-37 | 0       | Il7r     |
| 0.872505967                              | 2.24E-32         | 1.68E-36 | 0       | Anxa1    |
| -1.934105549                             | 5.85E-32         | 4.38E-36 | 0       | Cbr2     |
| 0.710985989                              | 6.35E-32         | 4.76E-36 | 0       | Bhlhe40  |
| 0.86034885                               | 6.73E-32         | 5.04E-36 | 0       | Lpl      |
| 1.15803012                               | 2.93E-31         | 2.20E-35 | 0       | Hilpda   |
| 0.567229305                              | 4.94E-31         | 3.70E-35 | 0       | Psap     |
| 1.001173567                              | 7.58E-31         | 5.68E-35 | 0       | Fn1      |
| 0.708604862                              | 1.07E-30         | 8.01E-35 | 0       | Abcg1    |
| 0.799876016                              | 1.23E-30         | 9.19E-35 | 0       | Pld3     |
| 1.239078294                              | 1.81E-30         | 1.36E-34 | 0       | Mmp19    |
| 0.449582744                              | 2.10E-30         | 1.58E-34 | 0       | Cd68     |
| 0.98813351                               | 8.29E-29         | 6.21E-33 | 0       | Acp5     |
| 1.19346815                               | 8.31E-29         | 6.22E-33 | 0       | Mgst1    |
| 0.693657722                              | 8.54E-29         | 6.40E-33 | 0       | Psmb6    |
| 1.11686649                               | 8.60E-29         | 6.44E-33 | 0       | Pdpn     |
| 1.336876089                              | 2.40E-27         | 1.80E-31 | 0       | Thbs1    |
| 1.175171478                              | 2.52E-27         | 1.88E-31 | 0       | Fabp4    |
| 0.858060305                              | 3.62E-27         | 2.71E-31 | 0       | Cd9      |
| 0.774714826                              | 4.18E-27         | 3.13E-31 | 0       | Sgk1     |
| 1.283242241                              | 4.40E-27         | 3.30E-31 | 0       | Sdc1     |
| 0.367553048                              | 7.25E-27         | 5.43E-31 | 0       | Ctss     |
| 0.663265774                              | 4.70E-26         | 3.52E-30 | 0       | Rnh1     |
| 0.557200858                              | 5.95E-26         | 4.46E-30 | 0       | Abca1    |
| 2.035346051                              | 1.62E-25         | 1.21E-29 | 0       | Slpi     |
| 0.898622011                              | 1.71E-25         | 1.28E-29 | 0       | Mmp14    |
| 1.228942117                              | 4.48E-25         | 3.35E-29 | 0       | Vegfa    |
| 0.743480068                              | 5.25E-25         | 3.93E-29 | 0       | Adam8    |

|              |          |          |   |               |
|--------------|----------|----------|---|---------------|
| 0.782955887  | 1.42E-24 | 1.06E-28 | 0 | Atp6v1c1      |
| 1.832793499  | 1.55E-24 | 1.16E-28 | 0 | Chil3         |
| 0.805755736  | 2.13E-24 | 1.60E-28 | 0 | Clec7a        |
| 0.398768594  | 3.50E-24 | 2.63E-28 | 0 | Vim           |
| 0.803455591  | 5.63E-24 | 4.22E-28 | 0 | Galnt6        |
| 0.717417829  | 1.43E-23 | 1.07E-27 | 0 | Anxa4         |
| 0.99403417   | 1.75E-23 | 1.31E-27 | 0 | Rgcc          |
| 1.02995677   | 2.30E-23 | 1.72E-27 | 0 | Scd2          |
| 1.347767361  | 3.45E-23 | 2.59E-27 | 0 | Arg2          |
| 1.183415397  | 4.53E-23 | 3.40E-27 | 0 | Fam63a        |
| 0.858475148  | 5.26E-23 | 3.94E-27 | 0 | Il1rn         |
| 1.182612336  | 6.63E-23 | 4.96E-27 | 0 | 1300002K09Rik |
| -1.57291794  | 1.23E-22 | 9.20E-27 | 0 | Hspa1a        |
| 0.513434452  | 1.24E-22 | 9.30E-27 | 0 | Anxa2         |
| 0.588844792  | 1.77E-22 | 1.32E-26 | 0 | Atp6v1a       |
| 0.755920757  | 2.21E-22 | 1.65E-26 | 0 | Esd           |
| 0.41740763   | 2.27E-22 | 1.70E-26 | 0 | Akr1a1        |
| 0.960045562  | 3.56E-22 | 2.66E-26 | 0 | Tmem65        |
| 0.64590084   | 4.80E-22 | 3.60E-26 | 0 | Creg1         |
| 0.737484662  | 6.32E-22 | 4.74E-26 | 0 | Emb           |
| 0.749001999  | 1.11E-21 | 8.28E-26 | 0 | Soat1         |
| 0.809652227  | 1.14E-21 | 8.52E-26 | 0 | Gla           |
| 0.299367298  | 1.24E-21 | 9.32E-26 | 0 | Ctsb          |
| 0.589663432  | 1.33E-21 | 9.99E-26 | 0 | Trem2         |
| 1.088938319  | 1.43E-21 | 1.07E-25 | 0 | Cd300lf       |
| -1.791830253 | 1.90E-21 | 1.42E-25 | 0 | Slco2b1       |
| -0.665071232 | 3.50E-21 | 2.62E-25 | 0 | Serinc3       |
| 0.61895248   | 4.27E-21 | 3.20E-25 | 0 | Pla2g7        |
| 0.344390153  | 6.09E-21 | 4.56E-25 | 0 | Ftl1          |
| 0.687809458  | 8.35E-21 | 6.25E-25 | 0 | Ctnnb1        |
| 0.356310714  | 1.10E-20 | 8.20E-25 | 0 | Lamp1         |
| -1.058993804 | 2.10E-20 | 1.57E-24 | 0 | Ccnd1         |
| 0.619561547  | 2.20E-20 | 1.65E-24 | 0 | Txn1          |
| 0.578109787  | 2.44E-20 | 1.83E-24 | 0 | Aprt          |
| 0.581895398  | 3.91E-20 | 2.93E-24 | 0 | Rnf149        |
| 0.950411022  | 6.01E-20 | 4.50E-24 | 0 | Slc27a1       |
| -1.430062701 | 1.30E-19 | 9.72E-24 | 0 | Lifr          |
| 0.529184438  | 2.88E-19 | 2.16E-23 | 0 | Prdx1         |
| 0.770162869  | 5.37E-19 | 4.02E-23 | 0 | Gstm1         |
| 0.963550738  | 6.60E-19 | 4.95E-23 | 0 | Fam20c        |
| 0.599155149  | 6.93E-19 | 5.19E-23 | 0 | Prr13         |
| 0.557834606  | 7.36E-19 | 5.52E-23 | 0 | Osbpl8        |
| 0.51898831   | 7.60E-19 | 5.70E-23 | 0 | Itgb2         |
| -1.86719763  | 8.35E-19 | 6.25E-23 | 0 | Mgl2          |
| 0.824518264  | 8.87E-19 | 6.65E-23 | 0 | Clec4d        |
| 0.969478343  | 1.28E-18 | 9.57E-23 | 0 | Papss2        |
| -1.302622594 | 1.56E-18 | 1.17E-22 | 0 | Ssh2          |
| -0.829568696 | 2.74E-18 | 2.05E-22 | 0 | Trf           |
| 1.018445472  | 7.37E-18 | 5.52E-22 | 0 | Gsr           |
| 0.583947543  | 1.11E-17 | 8.33E-22 | 0 | Atp6v1b2      |
| 0.651625296  | 1.29E-17 | 9.67E-22 | 0 | Hvcn1         |
| 0.804237283  | 1.50E-17 | 1.12E-21 | 0 | Clec4n        |
| -0.93232217  | 1.58E-17 | 1.18E-21 | 0 | Slamf9        |
| 0.456852458  | 1.78E-17 | 1.33E-21 | 0 | Ndufa3        |
| -1.369508537 | 1.97E-17 | 1.48E-21 | 0 | Fcgrt         |
| 0.306037385  | 2.03E-17 | 1.52E-21 | 0 | Ctsz          |
| 1.326530856  | 2.19E-17 | 1.64E-21 | 0 | Slc7a11       |
| 0.629922197  | 2.29E-17 | 1.72E-21 | 0 | Vat1          |
| 0.929703073  | 2.33E-17 | 1.75E-21 | 0 | Flrt3         |
| 0.651907994  | 3.63E-17 | 2.72E-21 | 0 | Commdd6       |
| 0.547624696  | 3.88E-17 | 2.90E-21 | 0 | Atp6v1e1      |



|              |          |          |   |               |
|--------------|----------|----------|---|---------------|
| 0.563226517  | 4.26E-17 | 3.19E-21 | 0 | Ndufa1        |
| 0.852582252  | 4.32E-17 | 3.24E-21 | 0 | Mocs2         |
| 1.668846714  | 6.77E-17 | 5.07E-21 | 0 | Inhba         |
| 0.513800858  | 6.83E-17 | 5.12E-21 | 0 | Tnfaip2       |
| -2.071280488 | 8.12E-17 | 6.08E-21 | 0 | Lyve1         |
| 0.346858055  | 2.00E-16 | 1.50E-20 | 0 | Gabarap       |
| 0.590364229  | 2.09E-16 | 1.57E-20 | 0 | Fam129b       |
| -1.717281011 | 4.17E-16 | 3.12E-20 | 0 | Igfbp4        |
| 0.743073796  | 4.62E-16 | 3.46E-20 | 0 | Fblim1        |
| 0.482707904  | 6.02E-16 | 4.51E-20 | 0 | Capg          |
| 0.996410807  | 6.61E-16 | 4.95E-20 | 0 | Clec4e        |
| -1.542274291 | 8.35E-16 | 6.26E-20 | 0 | Tmem176a      |
| -0.739953442 | 8.72E-16 | 6.53E-20 | 0 | Cd83          |
| -1.863043046 | 1.64E-15 | 1.23E-19 | 0 | Retnla        |
| 0.772988429  | 1.92E-15 | 1.44E-19 | 0 | Gzf1          |
| 0.441237408  | 2.92E-15 | 2.19E-19 | 0 | Atp6v0e       |
| 0.655457163  | 3.22E-15 | 2.41E-19 | 0 | Sod2          |
| 0.894330476  | 5.59E-15 | 4.18E-19 | 0 | Slc6a8        |
| 0.511363022  | 6.09E-15 | 4.56E-19 | 0 | Nceh1         |
| 0.735833037  | 6.43E-15 | 4.82E-19 | 0 | Eepd1         |
| 0.658369398  | 7.69E-15 | 5.76E-19 | 0 | Gde1          |
| -1.269739027 | 7.74E-15 | 5.80E-19 | 0 | Cxcl10        |
| 0.525722916  | 1.00E-14 | 7.49E-19 | 0 | Degs1         |
| 0.436037489  | 1.24E-14 | 9.26E-19 | 0 | Pkm           |
| 0.613195027  | 1.25E-14 | 9.37E-19 | 0 | Gdf15         |
| 0.55900008   | 1.55E-14 | 1.16E-18 | 0 | Plaur         |
| 0.767755058  | 1.78E-14 | 1.33E-18 | 0 | Znhit1        |
| 0.615265462  | 2.55E-14 | 1.91E-18 | 0 | Malt1         |
| 0.556524477  | 2.82E-14 | 2.11E-18 | 0 | Csf2rb2       |
| 0.800151629  | 2.86E-14 | 2.14E-18 | 0 | Atg12         |
| -0.712910828 | 2.99E-14 | 2.24E-18 | 0 | H2-Eb1        |
| 0.686473188  | 3.00E-14 | 2.25E-18 | 0 | Cd300a        |
| 0.318124279  | 3.07E-14 | 2.30E-18 | 0 | Lgals1        |
| 0.523806465  | 3.55E-14 | 2.66E-18 | 0 | Cd84          |
| 0.528170633  | 3.61E-14 | 2.70E-18 | 0 | Tgm2          |
| 0.618859419  | 4.12E-14 | 3.09E-18 | 0 | Cox17         |
| 0.412818825  | 4.15E-14 | 3.11E-18 | 0 | Aldoa         |
| 0.522625925  | 4.25E-14 | 3.18E-18 | 0 | Prdx5         |
| -1.447943336 | 5.90E-14 | 4.42E-18 | 0 | Folr2         |
| 0.567229707  | 5.96E-14 | 4.46E-18 | 0 | Ckap4         |
| 0.651570296  | 6.92E-14 | 5.18E-18 | 0 | Msr1          |
| -1.025996767 | 1.10E-13 | 8.20E-18 | 0 | Fcrls         |
| 0.599182635  | 1.25E-13 | 9.39E-18 | 0 | Lyz1          |
| 0.406508582  | 1.28E-13 | 9.61E-18 | 0 | Mpeg1         |
| 0.775665309  | 1.68E-13 | 1.26E-17 | 0 | 1110008P14Rik |
| 0.650477794  | 1.74E-13 | 1.31E-17 | 0 | Al413582      |
| 0.600301798  | 1.95E-13 | 1.46E-17 | 0 | Fnip2         |
| 0.524535564  | 2.37E-13 | 1.78E-17 | 0 | Smpdl3a       |
| -0.841290272 | 3.34E-13 | 2.50E-17 | 0 | Stab1         |
| 0.350038312  | 3.58E-13 | 2.68E-17 | 0 | Sdcbp         |
| -1.954856214 | 4.06E-13 | 3.04E-17 | 0 | Cd163         |
| -0.772433137 | 4.56E-13 | 3.41E-17 | 0 | Tgfb2         |
| 0.518641423  | 5.63E-13 | 4.21E-17 | 0 | Gsto1         |
| 0.900848558  | 9.45E-13 | 7.08E-17 | 0 | Cipc          |
| 0.804555189  | 1.18E-12 | 8.85E-17 | 0 | Igf2r         |
| 0.450054532  | 1.27E-12 | 9.50E-17 | 0 | 2010107E04Rik |
| 0.868064139  | 1.83E-12 | 1.37E-16 | 0 | Hsd3b7        |
| 0.529746933  | 2.19E-12 | 1.64E-16 | 0 | Clcn7         |
| -0.549362296 | 2.72E-12 | 2.04E-16 | 0 | Csf1r         |
| 0.524221109  | 2.82E-12 | 2.11E-16 | 0 | Csf2rb        |
| 0.466816274  | 3.55E-12 | 2.66E-16 | 0 | Trim25        |

|              |          |          |   |               |
|--------------|----------|----------|---|---------------|
| 0.306120779  | 4.27E-12 | 3.20E-16 | 0 | Anxa5         |
| 0.977191092  | 4.41E-12 | 3.31E-16 | 0 | Gng11         |
| -1.163109857 | 4.58E-12 | 3.43E-16 | 0 | Mrc1          |
| 0.633277923  | 4.65E-12 | 3.49E-16 | 0 | Hist1h2bc     |
| 0.778181376  | 5.65E-12 | 4.23E-16 | 0 | Echs1         |
| 0.549771778  | 6.46E-12 | 4.84E-16 | 0 | Uap1l1        |
| -1.694557527 | 6.53E-12 | 4.89E-16 | 0 | Cp            |
| 0.268409176  | 7.06E-12 | 5.29E-16 | 0 | Npc2          |
| -0.926968596 | 8.78E-12 | 6.57E-16 | 0 | Tcf4          |
| 0.364339748  | 9.88E-12 | 7.40E-16 | 0 | Mir692-1      |
| -1.363618064 | 1.18E-11 | 8.84E-16 | 0 | Cx3cr1        |
| 0.830930505  | 1.34E-11 | 1.00E-15 | 0 | Hk3           |
| 0.625756821  | 1.60E-11 | 1.19E-15 | 0 | P2rx4         |
| 0.423993315  | 1.68E-11 | 1.26E-15 | 0 | AF251705      |
| 0.765171574  | 1.87E-11 | 1.40E-15 | 0 | Sar1b         |
| 0.488616634  | 2.00E-11 | 1.50E-15 | 0 | Tpp1          |
| 0.588992827  | 2.42E-11 | 1.81E-15 | 0 | Lrp12         |
| 0.664390821  | 2.71E-11 | 2.03E-15 | 0 | Mfsd7b        |
| 0.550054161  | 2.86E-11 | 2.15E-15 | 0 | Cebpb         |
| -0.643276182 | 3.66E-11 | 2.74E-15 | 0 | Ccl4          |
| 0.724275596  | 4.25E-11 | 3.18E-15 | 0 | Cd200         |
| 0.471914801  | 4.69E-11 | 3.51E-15 | 0 | Myof          |
| 0.754728213  | 5.65E-11 | 4.23E-15 | 0 | Ap3s1         |
| 0.393667103  | 6.20E-11 | 4.64E-15 | 0 | 5730416F02Rik |
| 0.977104633  | 6.63E-11 | 4.97E-15 | 0 | Gyg           |
| 0.540994985  | 7.17E-11 | 5.37E-15 | 0 | Cib1          |
| -0.870411238 | 7.61E-11 | 5.70E-15 | 0 | Cd72          |
| 0.716408425  | 7.86E-11 | 5.89E-15 | 0 | Fgr           |
| 0.586445003  | 8.16E-11 | 6.11E-15 | 0 | Nkap          |
| -1.371593863 | 9.60E-11 | 7.19E-15 | 0 | Cdr2          |
| -1.283823148 | 9.94E-11 | 7.44E-15 | 0 | Maf           |
| 0.451174553  | 1.01E-10 | 7.59E-15 | 0 | Ndufc1        |
| 0.493489504  | 1.11E-10 | 8.34E-15 | 0 | Atp6v1d       |
| 0.824611825  | 1.13E-10 | 8.49E-15 | 0 | Fbxo32        |
| 0.736915006  | 1.19E-10 | 8.89E-15 | 0 | Slc37a2       |
| 0.429154856  | 1.24E-10 | 9.26E-15 | 0 | Lipa          |
| 0.330195741  | 1.28E-10 | 9.57E-15 | 0 | Emp3          |
| -1.323746637 | 1.47E-10 | 1.10E-14 | 0 | Hpgd          |
| -1.429404343 | 1.97E-10 | 1.48E-14 | 0 | Abca9         |
| 0.648575901  | 2.14E-10 | 1.60E-14 | 0 | Setd8         |
| 0.818534599  | 2.24E-10 | 1.68E-14 | 0 | Ddhd1         |
| 0.552204488  | 2.81E-10 | 2.10E-14 | 0 | Ndufb6        |
| -1.641111207 | 3.02E-10 | 2.26E-14 | 0 | Hspa1b        |
| 0.624426453  | 3.41E-10 | 2.56E-14 | 0 | Tmem165       |
| 0.328988873  | 3.50E-10 | 2.62E-14 | 0 | Shfm1         |
| 0.515080884  | 3.74E-10 | 2.80E-14 | 0 | Npc1          |
| 0.534894382  | 3.90E-10 | 2.92E-14 | 0 | Abr           |
| 0.356221174  | 4.08E-10 | 3.05E-14 | 0 | Pnpla7        |
| -0.579415543 | 4.14E-10 | 3.10E-14 | 0 | H2-Ab1        |
| 0.62416641   | 5.17E-10 | 3.88E-14 | 0 | Lonrf3        |
| 0.410863925  | 6.15E-10 | 4.61E-14 | 0 | S100a6        |
| -1.271835738 | 6.39E-10 | 4.79E-14 | 0 | Col14a1       |
| -0.879359569 | 6.58E-10 | 4.93E-14 | 0 | Pf4           |
| -0.651971961 | 6.85E-10 | 5.13E-14 | 0 | Emr1          |
| -1.096487933 | 7.44E-10 | 5.57E-14 | 0 | Alox5         |
| 0.460771279  | 7.81E-10 | 5.85E-14 | 0 | Tomm6         |
| 0.460561539  | 8.25E-10 | 6.18E-14 | 0 | Nagk          |
| -1.506035125 | 8.64E-10 | 6.47E-14 | 0 | Ccl12         |
| -1.166818947 | 8.69E-10 | 6.51E-14 | 0 | Dst           |
| 0.661031817  | 9.61E-10 | 7.20E-14 | 0 | Iqsec1        |
| -0.342531298 | 1.01E-09 | 7.56E-14 | 0 | Rps20         |

|              |          |          |   |               |
|--------------|----------|----------|---|---------------|
| 0.439002802  | 1.01E-09 | 7.57E-14 | 0 | Mrpl20        |
| -0.98311544  | 1.10E-09 | 8.25E-14 | 0 | Mef2c         |
| 0.606421609  | 1.20E-09 | 8.99E-14 | 0 | Cav2          |
| -0.591894823 | 1.27E-09 | 9.49E-14 | 0 | Dab2          |
| 0.511747248  | 1.65E-09 | 1.23E-13 | 0 | Fbxo33        |
| -1.423774277 | 1.70E-09 | 1.27E-13 | 0 | Gas6          |
| -1.542817962 | 1.76E-09 | 1.32E-13 | 0 | Ptgs1         |
| 0.47716265   | 1.88E-09 | 1.41E-13 | 0 | Lrpap1        |
| 0.614890421  | 1.97E-09 | 1.48E-13 | 0 | Gng12         |
| 0.344649391  | 2.07E-09 | 1.55E-13 | 0 | Mcf2          |
| -0.603227731 | 2.13E-09 | 1.59E-13 | 0 | Pld4          |
| 0.349891076  | 2.15E-09 | 1.61E-13 | 0 | Litaf         |
| 0.690466338  | 2.34E-09 | 1.76E-13 | 0 | Npy           |
| -0.254141561 | 2.51E-09 | 1.88E-13 | 0 | Malat1        |
| 0.290658924  | 2.51E-09 | 1.88E-13 | 0 | Chchd2        |
| 0.517725009  | 2.61E-09 | 1.95E-13 | 0 | Nus1          |
| 0.386267071  | 2.74E-09 | 2.05E-13 | 0 | Tnfsf12       |
| 0.801102114  | 3.04E-09 | 2.28E-13 | 0 | Plxna1        |
| 0.45054292   | 3.12E-09 | 2.33E-13 | 0 | Bnip3l        |
| 0.461477917  | 3.29E-09 | 2.46E-13 | 0 | Gpr137b-ps    |
| 0.472943819  | 3.64E-09 | 2.73E-13 | 0 | Mrpl36        |
| 0.465725698  | 4.31E-09 | 3.23E-13 | 0 | Esyt1         |
| 1.137870062  | 4.45E-09 | 3.33E-13 | 0 | Csf1          |
| 0.673220979  | 4.62E-09 | 3.46E-13 | 0 | Large         |
| 0.514402265  | 4.91E-09 | 3.68E-13 | 0 | Atp6v0d1      |
| 0.38034075   | 5.39E-09 | 4.04E-13 | 0 | Ccl6          |
| 0.838850561  | 5.60E-09 | 4.19E-13 | 0 | Atp1a3        |
| -1.112669536 | 5.73E-09 | 4.29E-13 | 0 | Cfh           |
| 0.522814648  | 9.81E-09 | 7.35E-13 | 0 | S100a1        |
| 0.463809692  | 9.82E-09 | 7.36E-13 | 0 | Lgals9        |
| 0.565929292  | 1.24E-08 | 9.26E-13 | 0 | 1810058124Rik |
| 0.412290285  | 1.24E-08 | 9.32E-13 | 0 | Dpm2          |
| 0.400761208  | 1.61E-08 | 1.21E-12 | 0 | Mdfic         |
| -0.747013789 | 1.71E-08 | 1.28E-12 | 0 | Ifi2712a      |
| 0.345410715  | 1.87E-08 | 1.40E-12 | 0 | Tmem256       |
| 0.357925367  | 1.98E-08 | 1.48E-12 | 0 | Cox5a         |
| 0.413379207  | 2.18E-08 | 1.63E-12 | 0 | Fam214b       |
| 0.606018603  | 2.23E-08 | 1.67E-12 | 0 | Cd274         |
| 0.268579915  | 2.35E-08 | 1.76E-12 | 0 | Atp6v0b       |
| -0.293370478 | 2.43E-08 | 1.82E-12 | 0 | Hspa8         |
| 0.715922018  | 2.50E-08 | 1.87E-12 | 0 | Sowahc        |
| 0.366689698  | 2.55E-08 | 1.91E-12 | 0 | Pdia6         |
| 0.474768903  | 2.76E-08 | 2.07E-12 | 0 | Mtpn          |
| -1.438207083 | 2.93E-08 | 2.19E-12 | 0 | F13a1         |
| 0.657888391  | 3.02E-08 | 2.26E-12 | 0 | Mfge8         |
| 0.393818153  | 3.45E-08 | 2.58E-12 | 0 | Gpr137b       |
| 0.35591425   | 3.57E-08 | 2.68E-12 | 0 | Vdac2         |
| -0.55733396  | 3.59E-08 | 2.69E-12 | 0 | Cd74          |
| 0.389802129  | 3.79E-08 | 2.84E-12 | 0 | Taldo1        |
| -1.741221494 | 3.94E-08 | 2.95E-12 | 0 | C4b           |
| -1.363089004 | 4.40E-08 | 3.29E-12 | 0 | Fxyd2         |
| 0.348822557  | 4.97E-08 | 3.72E-12 | 0 | Surf4         |
| 0.455427437  | 5.00E-08 | 3.75E-12 | 0 | Blvra         |
| 0.397701657  | 5.08E-08 | 3.80E-12 | 0 | Nme1          |
| 0.390834803  | 5.59E-08 | 4.18E-12 | 0 | Cox5b         |
| 0.552280964  | 6.10E-08 | 4.57E-12 | 0 | Vwf           |
| 0.82108316   | 7.18E-08 | 5.37E-12 | 0 | Htra1         |
| 0.377322436  | 9.73E-08 | 7.29E-12 | 0 | Spcs1         |
| -1.376502792 | 1.02E-07 | 7.62E-12 | 0 | Lilra5        |
| 0.426605325  | 1.08E-07 | 8.10E-12 | 0 | Ssu72         |
| 0.518664912  | 1.14E-07 | 8.56E-12 | 0 | Cln3          |

|              |          |          |   |               |
|--------------|----------|----------|---|---------------|
| -1.151013701 | 1.19E-07 | 8.88E-12 | 0 | Txnip         |
| 0.555602437  | 1.22E-07 | 9.16E-12 | 0 | Tmem9b        |
| 0.39222466   | 1.26E-07 | 9.43E-12 | 0 | Tgif1         |
| 0.984436236  | 1.29E-07 | 9.69E-12 | 0 | Alas1         |
| 0.348498249  | 1.46E-07 | 1.09E-11 | 0 | Cd44          |
| 0.263009033  | 1.64E-07 | 1.23E-11 | 0 | Cox6b1        |
| 0.523817912  | 1.78E-07 | 1.33E-11 | 0 | Grpel1        |
| -1.476510478 | 1.87E-07 | 1.40E-11 | 0 | Clec4b1       |
| 0.468570295  | 2.03E-07 | 1.52E-11 | 0 | 0610012G03Rik |
| 0.337455011  | 2.10E-07 | 1.57E-11 | 0 | Lgmn          |
| 0.355842696  | 2.41E-07 | 1.81E-11 | 0 | Ms4a6d        |
| 0.479255094  | 2.68E-07 | 2.01E-11 | 0 | Cmas          |
| 0.282533233  | 2.70E-07 | 2.02E-11 | 0 | Gga2          |
| 0.411675622  | 2.79E-07 | 2.09E-11 | 0 | Psmc4         |
| 0.435844134  | 2.98E-07 | 2.23E-11 | 0 | Psmd14        |
| 0.729661695  | 3.53E-07 | 2.64E-11 | 0 | Pqlc3         |
| -0.719930085 | 3.56E-07 | 2.67E-11 | 0 | Stk17b        |
| 0.857432448  | 3.90E-07 | 2.92E-11 | 0 | Fam198b       |
| 0.279295961  | 4.10E-07 | 3.07E-11 | 0 | Tcirg1        |
| 0.777626928  | 4.32E-07 | 3.24E-11 | 0 | Htatip2       |
| 0.426048973  | 4.52E-07 | 3.39E-11 | 0 | BC031181      |
| 0.314912966  | 4.60E-07 | 3.45E-11 | 0 | Cox6c         |
| 0.361230993  | 5.24E-07 | 3.92E-11 | 0 | C3            |
| 0.551189675  | 5.40E-07 | 4.05E-11 | 0 | Rnf181        |
| 0.348039901  | 5.59E-07 | 4.18E-11 | 0 | Arhgap9       |
| 0.524490788  | 5.91E-07 | 4.43E-11 | 0 | Ipo5          |
| 0.591369806  | 6.29E-07 | 4.71E-11 | 0 | Pbdc1         |
| -1.266079328 | 6.74E-07 | 5.05E-11 | 0 | Gpr34         |
| 0.47801251   | 7.00E-07 | 5.24E-11 | 0 | Ube2a         |
| 0.305513071  | 7.84E-07 | 5.87E-11 | 0 | Rnasek        |
| 0.303621688  | 8.32E-07 | 6.23E-11 | 0 | Lrp1          |
| 0.400847642  | 9.01E-07 | 6.75E-11 | 0 | Snx10         |
| 0.454523962  | 9.38E-07 | 7.02E-11 | 0 | Snx1          |
| 0.499240273  | 9.66E-07 | 7.23E-11 | 0 | Aurkaip1      |
| 0.387132027  | 9.70E-07 | 7.27E-11 | 0 | Atp6v1f       |
| 0.404755351  | 9.70E-07 | 7.27E-11 | 0 | Ccl9          |
| 0.442171327  | 9.91E-07 | 7.42E-11 | 0 | Lasp1         |
| -0.586240057 | 1.06E-06 | 7.91E-11 | 0 | Adrbk1        |
| 0.552638762  | 1.07E-06 | 8.03E-11 | 0 | Igsf8         |
| 0.333186159  | 1.19E-06 | 8.89E-11 | 0 | Sgpl1         |
| 0.290772259  | 1.25E-06 | 9.36E-11 | 0 | Snrnp27       |
| 0.449631474  | 1.35E-06 | 1.01E-10 | 0 | Ndufa9        |
| 0.362614789  | 1.47E-06 | 1.10E-10 | 0 | Scamp3        |
| 0.660761607  | 1.47E-06 | 1.10E-10 | 0 | Agtrap        |
| 0.436460494  | 1.67E-06 | 1.25E-10 | 0 | Gaa           |
| -0.580800663 | 1.77E-06 | 1.32E-10 | 0 | Ptpn18        |
| 0.320046317  | 1.79E-06 | 1.34E-10 | 0 | Psen2         |
| -1.466577037 | 1.83E-06 | 1.37E-10 | 0 | Ltc4s         |
| 0.343268802  | 1.87E-06 | 1.40E-10 | 0 | Vps35         |
| 0.615671703  | 1.89E-06 | 1.42E-10 | 0 | Evl           |
| 0.432755556  | 1.93E-06 | 1.45E-10 | 0 | Ugp2          |
| -0.931999898 | 2.08E-06 | 1.56E-10 | 0 | Ptger4        |
| -0.50572358  | 2.11E-06 | 1.58E-10 | 0 | H2-Aa         |
| 0.397893986  | 2.18E-06 | 1.63E-10 | 0 | Sep.15        |
| -1.4530955   | 2.41E-06 | 1.80E-10 | 0 |               |
| 0.557280026  | 2.55E-06 | 1.91E-10 | 0 | Ednrb         |
| 0.356073272  | 2.62E-06 | 1.96E-10 | 0 | Sdhd          |
| 0.25256608   | 3.04E-06 | 2.28E-10 | 0 | Cd93          |
| -0.641642815 | 3.07E-06 | 2.30E-10 | 0 | Gm2a          |
| -0.404488178 | 3.33E-06 | 2.49E-10 | 0 | Ccl3          |
| 0.345157783  | 3.35E-06 | 2.51E-10 | 0 | Nfkbiz        |
|              |          |          | 0 | Irf2bpl       |

|              |          |          |   |               |
|--------------|----------|----------|---|---------------|
| 0.290472465  | 3.44E-06 | 2.57E-10 | 0 | Uqcr11        |
| 0.465057205  | 3.47E-06 | 2.60E-10 | 0 | Dtnbp1        |
| 0.319488475  | 3.52E-06 | 2.64E-10 | 0 | S100a11       |
| 0.396921189  | 3.56E-06 | 2.67E-10 | 0 | 0610031J06Rik |
| -1.200176856 | 3.66E-06 | 2.74E-10 | 0 | Adam19        |
| -0.728879879 | 3.69E-06 | 2.76E-10 | 0 | Zfp3611       |
| 0.425869809  | 3.77E-06 | 2.83E-10 | 0 | AB124611      |
| 0.333946208  | 4.02E-06 | 3.01E-10 | 0 | Rab1          |
| 0.515829879  | 4.23E-06 | 3.16E-10 | 0 | Ddt           |
| 0.383634655  | 4.34E-06 | 3.25E-10 | 0 | Cox7a2        |
| 0.326399269  | 4.35E-06 | 3.26E-10 | 0 | Atad1         |
| -0.916460373 | 4.41E-06 | 3.31E-10 | 0 | Syne1         |
| -0.62936283  | 4.70E-06 | 3.52E-10 | 0 | Eid1          |
| 0.373761205  | 5.67E-06 | 4.25E-10 | 0 | Gusb          |
| -1.229644209 | 6.25E-06 | 4.68E-10 | 0 | Ifit1         |
| 0.686291097  | 6.71E-06 | 5.03E-10 | 0 | Gpalpp1       |
| 0.30976861   | 7.49E-06 | 5.61E-10 | 0 | Cd48          |
| 0.326429946  | 7.84E-06 | 5.87E-10 | 0 | 1110007C09Rik |
| 0.939554732  | 7.97E-06 | 5.97E-10 | 0 | Sh2b2         |
| -1.084573848 | 8.40E-06 | 6.29E-10 | 0 | Smagp         |
| 0.300728653  | 8.47E-06 | 6.34E-10 | 0 | Atp6ap1       |
| -1.177040945 | 9.44E-06 | 7.07E-10 | 0 | Nes           |
| 0.418029127  | 9.58E-06 | 7.18E-10 | 0 | Acaa2         |
| -1.20290243  | 9.87E-06 | 7.39E-10 | 0 | Fgd2          |
| 0.607766812  | 9.94E-06 | 7.44E-10 | 0 | Mrpl38        |
| 0.541741516  | 9.94E-06 | 7.45E-10 | 0 | Osm           |
| 1.454768337  | 1.13E-05 | 8.44E-10 | 0 | S100a8        |
| 0.338112327  | 1.18E-05 | 8.86E-10 | 0 | Pdcd6         |
| 0.530877056  | 1.19E-05 | 8.88E-10 | 0 | Snhg3         |
| -0.645419107 | 1.20E-05 | 8.98E-10 | 0 | Ppp1r15a      |
| 0.376959334  | 1.21E-05 | 9.04E-10 | 0 | Timm13        |
| 0.294677076  | 1.21E-05 | 9.07E-10 | 0 | Zfand2a       |
| 0.488712677  | 1.22E-05 | 9.14E-10 | 0 | Sgsh          |
| 0.336966888  | 1.25E-05 | 9.33E-10 | 0 | Sirpa         |
| -0.881358152 | 1.29E-05 | 9.64E-10 | 0 | Peak1         |
| 0.326619945  | 1.32E-05 | 9.87E-10 | 0 | Slc43a2       |
| 0.600804023  | 1.34E-05 | 1.00E-09 | 0 | Pgd           |
| -0.471201983 | 1.41E-05 | 1.06E-09 | 0 | Wnk1          |
| 0.417429254  | 1.48E-05 | 1.11E-09 | 0 | Atraid        |
| 0.296588888  | 1.59E-05 | 1.19E-09 | 0 | Dusp3         |
| 0.334960481  | 1.64E-05 | 1.22E-09 | 0 | Dap           |
| 0.307887893  | 1.64E-05 | 1.23E-09 | 0 | Cox7b         |
| -1.232794271 | 1.65E-05 | 1.24E-09 | 0 | Psd3          |
| 0.461213693  | 1.84E-05 | 1.38E-09 | 0 | Ostm1         |
| -0.878044208 | 1.87E-05 | 1.40E-09 | 0 | Trex1         |
| 0.355895973  | 1.88E-05 | 1.41E-09 | 0 | Pygl          |
| 0.383158404  | 1.91E-05 | 1.43E-09 | 0 | Ndufb8        |
| -0.574822795 | 1.94E-05 | 1.45E-09 | 0 | Marcks11      |
| 0.454207901  | 2.12E-05 | 1.59E-09 | 0 | Tmem189       |
| -0.298865863 | 2.38E-05 | 1.78E-09 | 0 | C1qc          |
| 0.486335011  | 2.41E-05 | 1.81E-09 | 0 | E430025E21Rik |
| -0.941887721 | 2.43E-05 | 1.82E-09 | 0 | Fnbp1l        |
| -0.918489008 | 2.62E-05 | 1.96E-09 | 0 | Pxdc1         |
| -0.821660591 | 2.81E-05 | 2.10E-09 | 0 | Pou2f2        |
| 0.503568152  | 2.91E-05 | 2.18E-09 | 0 | Tmem203       |
| -1.017437668 | 2.98E-05 | 2.23E-09 | 0 | Ptchd1        |
| -0.397750208 | 3.02E-05 | 2.26E-09 | 0 | Rgs10         |
| 0.470725912  | 3.13E-05 | 2.35E-09 | 0 | Tex264        |
| 0.422828659  | 3.14E-05 | 2.35E-09 | 0 | Bax           |
| 0.291313547  | 3.17E-05 | 2.38E-09 | 0 | Cpeb4         |
| 0.53288016   | 3.23E-05 | 2.42E-09 | 0 | Tmem206       |

|              |             |          |   |               |
|--------------|-------------|----------|---|---------------|
| 0.268036731  | 3.40E-05    | 2.54E-09 | 0 | Pet100        |
| -1.409351611 | 3.45E-05    | 2.59E-09 | 0 | Rcn3          |
| 0.497341741  | 3.49E-05    | 2.61E-09 | 0 | 1700017B05Rik |
| 0.42787176   | 3.62E-05    | 2.71E-09 | 0 | Cers2         |
| -1.115718027 | 3.70E-05    | 2.77E-09 | 0 | Ch25h         |
| -1.206021087 | 3.70E-05    | 2.77E-09 | 0 | St3gal6       |
| 0.602722079  | 3.74E-05    | 2.80E-09 | 0 | Cd24a         |
| 0.273978688  | 4.06E-05    | 3.04E-09 | 0 | Fis1          |
| -0.669398624 | 4.06E-05    | 3.04E-09 | 0 | Cd86          |
| 0.380498898  | 4.15E-05    | 3.11E-09 | 0 | Edem2         |
| 0.456930327  | 4.20E-05    | 3.15E-09 | 0 | Atp6v1h       |
| 0.78576394   | 4.23E-05    | 3.17E-09 | 0 | Nr1h3         |
| 0.381683211  | 4.62E-05    | 3.46E-09 | 0 | Mktn1         |
| -0.831540382 | 4.67E-05    | 3.50E-09 | 0 | Tnfsf13b      |
| -0.749770551 | 5.01E-05    | 3.75E-09 | 0 | Herpud1       |
| 0.4335402    | 5.08E-05    | 3.80E-09 | 0 | Cd300lb       |
| 0.431246287  | 5.09E-05    | 3.81E-09 | 0 | Samd8         |
| 0.343554188  | 5.19E-05    | 3.89E-09 | 0 | Ndufa7        |
| 0.661800352  | 5.34E-05    | 4.00E-09 | 0 | Orc3          |
| 0.672001547  | 5.41E-05    | 4.05E-09 | 0 | Epas1         |
| -1.553686747 | 5.49E-05    | 4.11E-09 | 0 | Ccl24         |
| 0.252942585  | 5.55E-05    | 4.16E-09 | 0 | Pomp          |
| 0.343228389  | 5.70E-05    | 4.27E-09 | 0 | Mob4          |
| -0.961882772 | 5.77E-05    | 4.32E-09 | 0 | Fez2          |
| 0.322808503  | 5.99E-05    | 4.48E-09 | 0 | Napsa         |
| 0.31071953   | 6.04E-05    | 4.52E-09 | 0 | Hsbp1         |
| 0.45347025   | 6.30E-05    | 4.72E-09 | 0 | Ly6c2         |
| 0.396881681  | 6.46E-05    | 4.84E-09 | 0 | Fam96a        |
| -0.410344036 | 6.57E-05    | 4.92E-09 | 0 | Arap3         |
| -0.835050162 | 6.61E-05    | 4.95E-09 | 0 | Sh3pxd2a      |
| 0.36792593   | 6.67E-05    | 4.99E-09 | 0 | Tceb1         |
| -0.597606039 | 7.17E-05    | 5.37E-09 | 0 | Prkcb         |
| -0.763928115 | 7.59E-05    | 5.69E-09 | 0 | Traf1         |
| 0.283027066  | 7.73E-05    | 5.79E-09 | 0 | Sec11c        |
| 0.90755886   | 8.37E-05    | 6.27E-09 | 0 | Kif3a         |
| 0.276589     | 8.37E-05    | 6.27E-09 | 0 | Arl8b         |
| -0.58446721  | 8.74E-05    | 6.55E-09 | 0 | C5ar1         |
| 0.332739153  | 8.80E-05    | 6.59E-09 | 0 | Atxn10        |
| 0.415239013  | 9.73E-05    | 7.29E-09 | 0 | Zfp593        |
| 0.307083593  | 9.83E-05    | 7.36E-09 | 0 | Atp6v1g1      |
| 0.298225099  | 0.000100864 | 7.55E-09 | 0 | Vps29         |
| 0.261956133  | 0.000101158 | 7.58E-09 | 0 | Rala          |
| 0.299846408  | 0.000101162 | 7.58E-09 | 0 | Ubl3          |
| 0.526852262  | 0.000101385 | 7.59E-09 | 0 | Impdh1        |
| 0.382204292  | 0.00010577  | 7.92E-09 | 0 | Trappc2l      |
| 0.316928089  | 0.000107773 | 8.07E-09 | 0 | Dnase2a       |
| 0.32903397   | 0.00010797  | 8.09E-09 | 0 | Pfdn1         |
| 0.278740317  | 0.000108843 | 8.15E-09 | 0 | Cox8a         |
| 0.494340156  | 0.000110594 | 8.28E-09 | 0 | Timm17a       |
| 0.303022999  | 0.000114685 | 8.59E-09 | 0 | Hpcal1        |
| -0.869969754 | 0.000120003 | 8.99E-09 | 0 | Gatm          |
| -0.843098752 | 0.000121057 | 9.07E-09 | 0 | Ptpro         |
| 0.722588128  | 0.000127044 | 9.52E-09 | 0 | Mgat4b        |
| 0.429616489  | 0.000140651 | 1.05E-08 | 0 | Cript         |
| 0.496637245  | 0.00014505  | 1.09E-08 | 0 | Bst1          |
| -1.183238349 | 0.000145329 | 1.09E-08 | 0 | Fcna          |
| 0.274203813  | 0.00014541  | 1.09E-08 | 0 | Psmd8         |
| 0.382468455  | 0.000151569 | 1.14E-08 | 0 | Hectd3        |
| 0.411538149  | 0.000171254 | 1.28E-08 | 0 | Cd22          |
| -0.855886765 | 0.000190595 | 1.43E-08 | 0 | Ctla2b        |
| -0.787898886 | 0.000197525 | 1.48E-08 | 0 | Ppp1r12c      |

|              |             |          |   |          |
|--------------|-------------|----------|---|----------|
| 0.490828577  | 0.000210573 | 1.58E-08 | 0 | Ppt2     |
| 0.414725716  | 0.000223422 | 1.67E-08 | 0 | Cnih4    |
| -0.86907031  | 0.000232547 | 1.74E-08 | 0 | Sipa1    |
| 0.293194228  | 0.000239088 | 1.79E-08 | 0 | Slc25a5  |
| 0.326135017  | 0.000240634 | 1.80E-08 | 0 | Usmg5    |
| 0.584720859  | 0.000242396 | 1.82E-08 | 0 | Cyp4f18  |
| 0.858488237  | 0.000244431 | 1.83E-08 | 0 | Dmxl2    |
| 0.565159853  | 0.000253241 | 1.90E-08 | 0 | Rfwd2    |
| 0.364768343  | 0.000253337 | 1.90E-08 | 0 | Mitf     |
| -0.797177304 | 0.00025813  | 1.93E-08 | 0 | Utrn     |
| -0.960448261 | 0.000265066 | 1.99E-08 | 0 | Rsad2    |
| 0.679953023  | 0.000265457 | 1.99E-08 | 0 | Arhgap24 |
| 0.561928256  | 0.000270168 | 2.02E-08 | 0 | Creld2   |
| -0.763122787 | 0.000288613 | 2.16E-08 | 0 | Ppp2r4   |
| 0.481942003  | 0.000339611 | 2.54E-08 | 0 | Nudt8    |
| 0.5505704    | 0.00036579  | 2.74E-08 | 0 | Sema4d   |
| -0.49086598  | 0.000367029 | 2.75E-08 | 0 | Neurl3   |
| 0.330804052  | 0.000383148 | 2.87E-08 | 0 | Atp13a2  |
| 0.378698158  | 0.000395252 | 2.96E-08 | 0 | Cat      |
| 0.535942328  | 0.00039599  | 2.97E-08 | 0 | Slc16a10 |
| 0.521528007  | 0.000415723 | 3.11E-08 | 0 | Psmc6    |
| 0.412334737  | 0.000429569 | 3.22E-08 | 0 | Mrpl41   |
| 0.284891316  | 0.000431053 | 3.23E-08 | 0 | Nampt    |
| 0.34844598   | 0.00044913  | 3.36E-08 | 0 | Atp5j    |
| 0.651848333  | 0.000509388 | 3.82E-08 | 0 | Mmadhc   |
| 0.466835844  | 0.000515218 | 3.86E-08 | 0 | Bola2    |
| -0.579591548 | 0.000525558 | 3.94E-08 | 0 | Filip1l  |
| -0.614931489 | 0.000539172 | 4.04E-08 | 0 | Ehd4     |
| 0.267530177  | 0.000541732 | 4.06E-08 | 0 | Ythdf1   |
| 0.47578374   | 0.000546017 | 4.09E-08 | 0 | Hmox2    |
| 0.260151736  | 0.000550553 | 4.12E-08 | 0 | Ak2      |
| 0.379456256  | 0.000557575 | 4.18E-08 | 0 | Plxnd1   |
| 0.313886883  | 0.000593462 | 4.44E-08 | 0 | Hif1a    |
| 0.301732041  | 0.000598143 | 4.48E-08 | 0 | Tax1bp1  |
| 0.435759391  | 0.000641962 | 4.81E-08 | 0 | Eif4e    |
| 0.266408737  | 0.000700962 | 5.25E-08 | 0 | Ppp2r1a  |
| 0.590567534  | 0.000706436 | 5.29E-08 | 0 | Elp2     |
| 0.38321239   | 0.000734545 | 5.50E-08 | 0 | Gtf2h5   |
| 0.382652856  | 0.00075     | 5.62E-08 | 0 | Slc11a1  |
| 0.32522444   | 0.00081145  | 6.08E-08 | 0 | Akirin1  |
| 0.367718928  | 0.000855455 | 6.41E-08 | 0 | Yif1b    |
| 0.268843477  | 0.000868437 | 6.50E-08 | 0 | Sars     |
| 0.348776739  | 0.000888551 | 6.65E-08 | 0 | Kcnk6    |
| 0.357942701  | 0.000895328 | 6.71E-08 | 0 | Bbip1    |
| 0.262054874  | 0.000899324 | 6.74E-08 | 0 | Dpp3     |
| 0.372080151  | 0.000921689 | 6.90E-08 | 0 | Tmem208  |
| 0.251742667  | 0.000951418 | 7.13E-08 | 0 | Mdm2     |
| 0.294427722  | 0.001006275 | 7.54E-08 | 0 | Uqcrb    |
| 0.312562677  | 0.001050736 | 7.87E-08 | 0 | Ssna1    |
| -0.64578185  | 0.001079688 | 8.09E-08 | 0 | Rel      |
| 0.495766482  | 0.001091625 | 8.18E-08 | 0 | Rrs1     |
| 0.34203763   | 0.001094999 | 8.20E-08 | 0 | B4galnt1 |
| 0.280630429  | 0.001117437 | 8.37E-08 | 0 | Spcs2    |
| 0.576891876  | 0.001138577 | 8.53E-08 | 0 | Mrto4    |
| 0.51998455   | 0.001160746 | 8.69E-08 | 0 | Ly9      |
| 0.257264907  | 0.001161525 | 8.70E-08 | 0 | Capns1   |
| 0.277946188  | 0.001170734 | 8.77E-08 | 0 | Dbi      |
| 0.520660049  | 0.001182769 | 8.86E-08 | 0 | Tmem38b  |
| -0.28400402  | 0.001190613 | 8.92E-08 | 0 | Ptma     |
| -0.25707889  | 0.001229591 | 9.21E-08 | 0 | Gnai2    |
| 0.280419645  | 0.001263021 | 9.46E-08 | 0 | Atp1b3   |

|              |             |          |   |               |
|--------------|-------------|----------|---|---------------|
| 0.55514274   | 0.001275143 | 9.55E-08 | 0 | Tpra1         |
| 0.369840938  | 0.001281667 | 9.60E-08 | 0 | D17Wsu104e    |
| 0.301546559  | 0.001304575 | 9.77E-08 | 0 | Comm4         |
| 0.426541087  | 0.001304872 | 9.77E-08 | 0 | Ezr           |
| 0.264696046  | 0.001324089 | 9.92E-08 | 0 | Cd53          |
| 0.310842418  | 0.001350372 | 1.01E-07 | 0 | Furin         |
| 0.316571673  | 0.001362191 | 1.02E-07 | 0 | Atg3          |
| 0.32558831   | 0.001367246 | 1.02E-07 | 0 | Matk          |
| 0.518870916  | 0.001485525 | 1.11E-07 | 0 | Vti1b         |
| 0.523750806  | 0.001515364 | 1.13E-07 | 0 | Gba           |
| 0.327892894  | 0.001523728 | 1.14E-07 | 0 | Thoc3         |
| 0.259042824  | 0.001527331 | 1.14E-07 | 0 | 1810013L24Rik |
| 0.299203549  | 0.001530505 | 1.15E-07 | 0 | Vapa          |
| 0.707007988  | 0.001550901 | 1.16E-07 | 0 | Ccdc167       |
| 0.677098026  | 0.001551513 | 1.16E-07 | 0 | Bhlhe41       |
| 0.271656928  | 0.001562252 | 1.17E-07 | 0 | Fkbp2         |
| 0.262744957  | 0.001567464 | 1.17E-07 | 0 | Tbcb          |
| 0.254994174  | 0.001577147 | 1.18E-07 | 0 | Mrpl30        |
| -0.658156827 | 0.001711797 | 1.28E-07 | 0 | Pmp22         |
| 0.367850419  | 0.001714872 | 1.28E-07 | 0 | Chmp5         |
| 0.2724889    | 0.00174019  | 1.30E-07 | 0 | Ecm1          |
| -0.866099657 | 0.001872705 | 1.40E-07 | 0 | Clec10a       |
| -0.286210688 | 0.001885725 | 1.41E-07 | 0 | C1qa          |
| 0.290872926  | 0.001889281 | 1.41E-07 | 0 | Orc4          |
| -0.786645062 | 0.001896017 | 1.42E-07 | 0 | Ifi203        |
| 0.574088346  | 0.001943253 | 1.46E-07 | 0 | Adssl1        |
| -0.957331402 | 0.002260463 | 1.69E-07 | 0 | Slc9a9        |
| 0.279517128  | 0.002267113 | 1.70E-07 | 0 | Tmsb10        |
| 0.413915619  | 0.002359861 | 1.77E-07 | 0 | Slc30a7       |
| 0.290204304  | 0.002384067 | 1.79E-07 | 0 | Dctn3         |
| 0.418187997  | 0.002464007 | 1.85E-07 | 0 | Slc31a2       |
| 0.368553831  | 0.002468595 | 1.85E-07 | 0 | 3110043O21Rik |
| 0.557661187  | 0.002528181 | 1.89E-07 | 0 | Ak6           |
| 0.589906717  | 0.00259751  | 1.95E-07 | 0 | Tnfrsf21      |
| -1.22808054  | 0.002810711 | 2.11E-07 | 0 | Fam71a        |
| 0.286969502  | 0.002902361 | 2.17E-07 | 0 | Sf3b5         |
| 0.335348733  | 0.002941862 | 2.20E-07 | 0 | Hnrnp1l       |
| 0.27250029   | 0.003010523 | 2.25E-07 | 0 | Prelid1       |
| 0.35634299   | 0.003078817 | 2.31E-07 | 0 | Fam104a       |
| 0.442242632  | 0.003191121 | 2.39E-07 | 0 | Ndufs4        |
| -0.626689668 | 0.003258757 | 2.44E-07 | 0 | Jun           |
| 0.304476706  | 0.003285017 | 2.46E-07 | 0 | Ethe1         |
| 0.333441627  | 0.003303711 | 2.47E-07 | 0 | Igsf6         |
| 0.371663081  | 0.003336752 | 2.50E-07 | 0 | Slc35f6       |
| -0.874596893 | 0.00343849  | 2.58E-07 | 0 | Rcsd1         |
| 0.457485265  | 0.003788032 | 2.84E-07 | 0 | Tmem242       |
| 0.460784795  | 0.003820793 | 2.86E-07 | 0 | Ap1s1         |
| 0.407985187  | 0.003825044 | 2.86E-07 | 0 | Arl5a         |
| 0.294579561  | 0.003918603 | 2.93E-07 | 0 | Dnajc15       |
| 0.292447621  | 0.003993886 | 2.99E-07 | 0 | Actn1         |
| 0.278754994  | 0.004119069 | 3.08E-07 | 0 | Serp1         |
| 0.375330462  | 0.004192061 | 3.14E-07 | 0 | Slc2a1        |
| 0.410627225  | 0.004298671 | 3.22E-07 | 0 | Cd36          |
| 0.321467274  | 0.004417537 | 3.31E-07 | 0 | Renbp         |
| 0.332937007  | 0.004433889 | 3.32E-07 | 0 | Arfgef2       |
| -0.938610186 | 0.004437437 | 3.32E-07 | 0 | Arhgap4       |
| 0.417815429  | 0.004711729 | 3.53E-07 | 0 | Pgap1         |
| 0.489364494  | 0.004757286 | 3.56E-07 | 0 | 2310022A10Rik |
| 0.309041073  | 0.004976836 | 3.73E-07 | 0 | Glrx3         |
| 0.703937106  | 0.004992951 | 3.74E-07 | 0 | Gnptab        |
| 0.530474627  | 0.005057033 | 3.79E-07 | 0 | Dym           |



|              |             |          |   |               |        |
|--------------|-------------|----------|---|---------------|--------|
| -0.499224118 | 0.005147585 | 3.86E-07 | 0 | Sepp1         |        |
| 0.25691877   | 0.005391461 | 4.04E-07 | 0 | Wfdc17        |        |
| 0.286319331  | 0.005396835 | 4.04E-07 | 0 | Srek1ip1      |        |
| 0.379640105  | 0.005584888 | 4.18E-07 | 0 | Arl8a         |        |
| -0.708823564 | 0.005836359 | 4.37E-07 | 0 | Pmepa1        |        |
| 0.269250438  | 0.005857832 | 4.39E-07 | 0 | Tomm22        |        |
| 0.258013873  | 0.006110777 | 4.58E-07 | 0 | Rps27l        |        |
| 0.418728254  | 0.006448859 | 4.83E-07 | 0 | Alg1          |        |
| 0.571124153  | 0.006460151 | 4.84E-07 | 0 |               | Sep.11 |
| 0.336898977  | 0.006537398 | 4.90E-07 | 0 | Azin1         |        |
| 0.373751756  | 0.00677473  | 5.07E-07 | 0 | Ndufb2        |        |
| 0.326653989  | 0.007141296 | 5.35E-07 | 0 | Txnrd1        |        |
| -0.657947427 | 0.007153026 | 5.36E-07 | 0 | Sdc4          |        |
| 0.522480655  | 0.007219659 | 5.41E-07 | 0 | Socs6         |        |
| 0.52126513   | 0.007423328 | 5.56E-07 | 0 | Chchd4        |        |
| 0.285055939  | 0.007552936 | 5.66E-07 | 0 | Zfp511        |        |
| -1.094979731 | 0.007879154 | 5.90E-07 | 0 | Mki67         |        |
| 0.380151569  | 0.008047464 | 6.03E-07 | 0 | Slc48a1       |        |
| 0.297602829  | 0.008200935 | 6.14E-07 | 0 | Tceal8        |        |
| 0.304677631  | 0.00823555  | 6.17E-07 | 0 | Atp6v0a1      |        |
| -1.206626516 | 0.008309637 | 6.22E-07 | 0 | Apobec3       |        |
| -0.369863614 | 0.008596261 | 6.44E-07 | 0 | Rock2         |        |
| 0.298429858  | 0.008672136 | 6.50E-07 | 0 | Mdh2          |        |
| 0.27961927   | 0.00886925  | 6.64E-07 | 0 | Hnrnpab       |        |
| -0.482762551 | 0.009035921 | 6.77E-07 | 0 | Clic4         |        |
| 0.532552895  | 0.00909509  | 6.81E-07 | 0 | Fuca2         |        |
| -0.736099517 | 0.009254044 | 6.93E-07 | 0 | Ap1b1         |        |
| 0.343532218  | 0.009732575 | 7.29E-07 | 0 | Txndc17       |        |
| 0.605616451  | 0.01015747  | 7.61E-07 | 0 | Smim12        |        |
| 0.518643951  | 0.010641294 | 7.97E-07 | 0 | Csf3r         |        |
| 0.415201048  | 0.010951921 | 8.20E-07 | 0 | Eno1b         |        |
| 0.253167124  | 0.011095776 | 8.31E-07 | 0 | Coro1c        |        |
| 0.252787551  | 0.011249768 | 8.43E-07 | 0 | Lgals3bp      |        |
| 0.498475843  | 0.011419871 | 8.55E-07 | 0 | Gclm          |        |
| -0.456163658 | 0.011470508 | 8.59E-07 | 0 | Jmjd1c        |        |
| 0.419098302  | 0.012028175 | 9.01E-07 | 0 | Grina         |        |
| -0.862131579 | 0.012155718 | 9.10E-07 | 0 | Ccnd2         |        |
| 0.259484454  | 0.01223711  | 9.17E-07 | 0 | Myl12a        |        |
| -0.744978757 | 0.012321805 | 9.23E-07 | 0 | Cebpz         |        |
| 0.486976778  | 0.012730617 | 9.53E-07 | 0 | Abcb7         |        |
| 0.515542319  | 0.013097755 | 9.81E-07 | 0 | Golga2        |        |
| 0.346356465  | 0.013110866 | 9.82E-07 | 0 | Atp5g1        |        |
| 0.288743573  | 0.013368902 | 1.00E-06 | 0 | Tmem167       |        |
| -0.535926489 | 0.013408892 | 1.00E-06 | 0 | Parp14        |        |
| 0.577022428  | 0.013523551 | 1.01E-06 | 0 | Slc39a11      |        |
| -1.144799358 | 0.013792648 | 1.03E-06 | 0 | Cmah          |        |
| 0.345577238  | 0.014031181 | 1.05E-06 | 0 | Psemb5        |        |
| 0.30906475   | 0.014565255 | 1.09E-06 | 0 | Ap2s1         |        |
| 0.375878123  | 0.014629079 | 1.10E-06 | 0 | Mrps28        |        |
| -0.688748115 | 0.01476135  | 1.11E-06 | 0 | Cd40          |        |
| -0.996145584 | 0.014944988 | 1.12E-06 | 0 | Klf2          |        |
| -0.551574564 | 0.014976813 | 1.12E-06 | 0 | Ckb           |        |
| -0.59724756  | 0.015196914 | 1.14E-06 | 0 | Hnrnpul1      |        |
| 0.362316568  | 0.015812846 | 1.18E-06 | 0 | 1500011K16Rik |        |
| 0.301549679  | 0.015862143 | 1.19E-06 | 0 | Pnkd          |        |
| 0.285013337  | 0.015894658 | 1.19E-06 | 0 | Ccdc86        |        |
| 0.404223056  | 0.01594248  | 1.19E-06 | 0 | Rexo2         |        |
| 0.285297596  | 0.016115273 | 1.21E-06 | 0 | Lamtor5       |        |
| -0.829094778 | 0.01689215  | 1.27E-06 | 0 | Ifih1         |        |
| 0.286228225  | 0.017060473 | 1.28E-06 | 0 | Mrps18c       |        |
| -0.87392955  | 0.017082001 | 1.28E-06 | 0 | Arhgef3       |        |

|              |             |          |   |               |
|--------------|-------------|----------|---|---------------|
| 0.34162629   | 0.017233807 | 1.29E-06 | 0 | Tmem87b       |
| 0.367028522  | 0.017436943 | 1.31E-06 | 0 | Nipsnap3b     |
| 0.459722149  | 0.018101625 | 1.36E-06 | 0 | Bola1         |
| 0.353491298  | 0.020394934 | 1.53E-06 | 0 | Emilin2       |
| 0.345063154  | 0.020489119 | 1.53E-06 | 0 | Zbtb8os       |
| 0.278667662  | 0.021379376 | 1.60E-06 | 0 | Pycard        |
| -0.947519248 | 0.021508538 | 1.61E-06 | 0 | Tagap         |
| 0.258320079  | 0.021709601 | 1.63E-06 | 0 | Gyk           |
| -0.414306103 | 0.022138389 | 1.66E-06 | 0 | Pea15a        |
| 0.281658744  | 0.02223857  | 1.67E-06 | 0 | Eif1a         |
| -0.702131967 | 0.022707356 | 1.70E-06 | 0 | Nfatc2        |
| 0.354754212  | 0.022976252 | 1.72E-06 | 0 | Romo1         |
| 0.410988151  | 0.023041582 | 1.73E-06 | 0 | Trappc4       |
| -0.504843559 | 0.023312646 | 1.75E-06 | 0 | Rcc2          |
| 0.456530816  | 0.023475832 | 1.76E-06 | 0 | Timm8b        |
| -0.521557323 | 0.02365916  | 1.77E-06 | 0 | Oasl1         |
| 0.452216855  | 0.025103052 | 1.88E-06 | 0 | Bri3          |
| -0.814221845 | 0.026491621 | 1.98E-06 | 0 | Egr1          |
| -0.705883417 | 0.026563619 | 1.99E-06 | 0 | Exoc3         |
| -0.945535283 | 0.027149475 | 2.03E-06 | 0 | Spn           |
| 0.280888116  | 0.028549462 | 2.14E-06 | 0 | Naa38         |
| 0.274311765  | 0.028559715 | 2.14E-06 | 0 | Mboat7        |
| 0.353090913  | 0.030087282 | 2.25E-06 | 0 | Emc7          |
| 0.52556829   | 0.030952724 | 2.32E-06 | 0 | Dlst          |
| -0.548169738 | 0.031804956 | 2.38E-06 | 0 | Fam110a       |
| -0.818630004 | 0.031925572 | 2.39E-06 | 0 | Il21r         |
| -0.550281526 | 0.033335391 | 2.50E-06 | 0 | Sertad2       |
| 0.66702471   | 0.033384914 | 2.50E-06 | 0 | Fbxw8         |
| 0.306175676  | 0.033421189 | 2.50E-06 | 0 | Mrpl14        |
| -0.701010605 | 0.035411115 | 2.65E-06 | 0 | Psemb9        |
| -0.857924174 | 0.035449035 | 2.65E-06 | 0 | Lyl1          |
| 0.363963934  | 0.035693047 | 2.67E-06 | 0 | Mien1         |
| 0.414617287  | 0.035834966 | 2.68E-06 | 0 | Map2k4        |
| -0.835573574 | 0.036622902 | 2.74E-06 | 0 | Pid1          |
| 0.363330584  | 0.036800902 | 2.76E-06 | 0 | Sidt2         |
| 0.283824959  | 0.037257267 | 2.79E-06 | 0 | Mrpl33        |
| 0.331051153  | 0.037637726 | 2.82E-06 | 0 | Acot10        |
| -0.707083992 | 0.037864678 | 2.84E-06 | 0 | Btg2          |
| 0.284607233  | 0.038066682 | 2.85E-06 | 0 | Ndufv3        |
| 0.426239765  | 0.038553748 | 2.89E-06 | 0 | Toporsos      |
| -0.714551687 | 0.0386348   | 2.89E-06 | 0 | Map3k3        |
| 0.256466461  | 0.039200529 | 2.94E-06 | 0 | Atp5h         |
| 0.276092945  | 0.040084192 | 3.00E-06 | 0 | Ccr1          |
| 0.349468761  | 0.040629297 | 3.04E-06 | 0 | Ralgds        |
| 0.263032837  | 0.04114391  | 3.08E-06 | 0 | Amz1          |
| 0.571045652  | 0.041868098 | 3.14E-06 | 0 | B430306N03Rik |
| 0.374140365  | 0.04187399  | 3.14E-06 | 0 | Scfd1         |
| -0.391338756 | 0.042024574 | 3.15E-06 | 0 | Bcl2          |
| 0.354929943  | 0.043657589 | 3.27E-06 | 0 | Psma4         |
| -0.327760841 | 0.044792789 | 3.35E-06 | 0 | Skil          |
| 0.579374994  | 0.04545413  | 3.40E-06 | 0 | Pphln1        |
| 0.34085206   | 0.046586178 | 3.49E-06 | 0 | N6amt2        |
| 0.292503083  | 0.046763946 | 3.50E-06 | 0 | Cyth1         |
| 0.481911374  | 0.047629304 | 3.57E-06 | 0 | Tmem43        |
| -0.336718434 | 0.04842943  | 3.63E-06 | 0 | Klf6          |
| -0.549337284 | 0.048582505 | 3.64E-06 | 0 | Sbf2          |
| -0.730201815 | 0.050010431 | 3.75E-06 | 0 | Mapk14        |
| -0.650057928 | 0.050581155 | 3.79E-06 | 0 | Itpripl1      |
| -0.753508786 | 0.052420535 | 3.93E-06 | 0 | Nfkbid        |
| 0.338383408  | 0.053315695 | 3.99E-06 | 0 | Cds2          |
| 0.33512923   | 0.053647472 | 4.02E-06 | 0 | Tm9sf2        |

|              |             |          |   |               |
|--------------|-------------|----------|---|---------------|
| 0.331755264  | 0.054241196 | 4.06E-06 | 0 | Rap2a         |
| 0.971662606  | 0.054623229 | 4.09E-06 | 0 | Met           |
| 0.524664198  | 0.054934888 | 4.11E-06 | 0 | Gdf3          |
| -0.440798752 | 0.05539434  | 4.15E-06 | 0 | Ctsc          |
| -0.646070537 | 0.055950488 | 4.19E-06 | 0 | Gamt          |
| -0.946930596 | 0.056590464 | 4.24E-06 | 0 | Smc2          |
| 0.641058939  | 0.058372465 | 4.37E-06 | 0 | Tecpr1        |
| 0.485554624  | 0.059132628 | 4.43E-06 | 0 | Usp14         |
| 0.27338259   | 0.059397246 | 4.45E-06 | 0 | Tnfrsf1b      |
| 0.613996482  | 0.059884024 | 4.49E-06 | 0 | Ubqln2        |
| 0.564820313  | 0.061569818 | 4.61E-06 | 0 | Vcl           |
| -0.868166929 | 0.063137355 | 4.73E-06 | 0 | Rnasel        |
| 0.277750246  | 0.065644519 | 4.92E-06 | 0 | Psenen        |
| 0.340084598  | 0.065812765 | 4.93E-06 | 0 | Mbp           |
| 0.308017916  | 0.067663397 | 5.07E-06 | 0 | Ten1          |
| 0.651820701  | 0.068477581 | 5.13E-06 | 0 | Nelfe         |
| -0.633787383 | 0.068722975 | 5.15E-06 | 0 | Cd2ap         |
| 0.29442228   | 0.06989467  | 5.23E-06 | 0 | Sec61g        |
| 0.474393515  | 0.070012858 | 5.24E-06 | 0 | Ptpmt1        |
| 0.29306529   | 0.070152904 | 5.25E-06 | 0 | Ech1          |
| -0.751979414 | 0.07037467  | 5.27E-06 | 0 | Hes1          |
| 0.5830779    | 0.070837509 | 5.31E-06 | 0 | Ltbp3         |
| 0.260486879  | 0.071073541 | 5.32E-06 | 0 | Copa          |
| 0.364819481  | 0.071771999 | 5.38E-06 | 0 | Abi1          |
| 0.663392034  | 0.072393463 | 5.42E-06 | 0 | Aggf1         |
| -0.769167501 | 0.079669476 | 5.97E-06 | 0 | Phlda1        |
| -1.014304397 | 0.083054875 | 6.22E-06 | 0 | Stard8        |
| 0.388069035  | 0.083641533 | 6.26E-06 | 0 | 2310039H08Rik |
| -0.596649411 | 0.084029801 | 6.29E-06 | 0 | Rnd3          |
| 0.272963518  | 0.085444847 | 6.40E-06 | 0 | Plin3         |
| 0.292109598  | 0.085454808 | 6.40E-06 | 0 | Utp6          |
| 0.540349067  | 0.0858357   | 6.43E-06 | 0 | Alkbh3        |
| -0.531796711 | 0.086463982 | 6.48E-06 | 0 | Ehd1          |
| 0.579067733  | 0.086714774 | 6.49E-06 | 0 | Tmem60        |
| -0.336798074 | 0.087132573 | 6.53E-06 | 0 | Marcks        |
| 0.361205873  | 0.091388662 | 6.84E-06 | 0 | Polr2g        |
| 0.364025254  | 0.092185341 | 6.90E-06 | 0 | Ttc13         |
| -0.588545384 | 0.095038075 | 7.12E-06 | 0 | Trim33        |
| 0.341086726  | 0.097925889 | 7.33E-06 | 0 | Tm2d1         |
| -0.320548721 | 0.100468469 | 7.52E-06 | 0 | Fos           |
| -0.501551799 | 0.10203518  | 7.64E-06 | 0 | Ppt1          |
| -0.651391567 | 0.102431776 | 7.67E-06 | 0 | Phf11b        |
| -0.98950835  | 0.103647044 | 7.76E-06 | 0 | Mtus1         |
| 0.315387982  | 0.103931145 | 7.78E-06 | 0 | Uckl1         |
| 0.274547263  | 0.106287386 | 7.96E-06 | 0 | Pgs1          |
| 0.281812579  | 0.108700978 | 8.14E-06 | 0 | Ufsp2         |
| -0.853700862 | 0.109439238 | 8.20E-06 | 0 | Arhgef6       |
| 0.522694394  | 0.110797506 | 8.30E-06 | 0 | Snx12         |
| 0.318966734  | 0.112225482 | 8.41E-06 | 0 | Plekhhf2      |
| -0.508028133 | 0.116298192 | 8.71E-06 | 0 | Rbm33         |
| -0.759335667 | 0.116457468 | 8.72E-06 | 0 | Tanc2         |
| -0.918175527 | 0.116505164 | 8.73E-06 | 0 | Rrm1          |
| 0.268332885  | 0.116513694 | 8.73E-06 | 0 | Wdr1          |
| 0.310686247  | 0.118712826 | 8.89E-06 | 0 | Vps26a        |
| 0.256240541  | 0.120024902 | 8.99E-06 | 0 | Ndufb3        |
| -0.290950952 | 0.121640558 | 9.11E-06 | 0 | Fyb           |
| 0.511398571  | 0.124087111 | 9.29E-06 | 0 | Wdr81         |
| 0.431782991  | 0.124624852 | 9.33E-06 | 0 | Cyp4v3        |
| -0.951266034 | 0.124625969 | 9.33E-06 | 0 | Elmsan1       |
| 0.295480926  | 0.126442249 | 9.47E-06 | 0 | Taf12         |
| 0.264163792  | 0.126930798 | 9.51E-06 | 0 | Cxcr4         |

|              |             |          |   |               |
|--------------|-------------|----------|---|---------------|
| 0.359447355  | 0.127039633 | 9.51E-06 | 0 | Snapc5        |
| 0.303040693  | 0.131376236 | 9.84E-06 | 0 | Itgav         |
| 0.329818779  | 0.131818686 | 9.87E-06 | 0 | Mcoln2        |
| -0.541249119 | 0.13211014  | 9.89E-06 | 0 | Frmd4b        |
| -0.648696705 | 0.136223171 | 1.02E-05 | 0 | Pla2g16       |
| 0.489522439  | 0.13788941  | 1.03E-05 | 0 | Ccdc53        |
| 0.375632581  | 0.140427798 | 1.05E-05 | 0 | Cln5          |
| -0.475333775 | 0.140780281 | 1.05E-05 | 0 | Ptprj         |
| 0.365268825  | 0.146913534 | 1.10E-05 | 0 | Ift22         |
| -0.440111586 | 0.147198616 | 1.10E-05 | 0 | Dapp1         |
| 0.361948967  | 0.147419775 | 1.10E-05 | 0 | Ppm1h         |
| 0.303310801  | 0.149918421 | 1.12E-05 | 0 | Rbm34         |
| -0.574368367 | 0.152404033 | 1.14E-05 | 0 | Pik3r1        |
| 0.70747854   | 0.153398181 | 1.15E-05 | 0 | Il1a          |
| 0.360206001  | 0.153480143 | 1.15E-05 | 0 | Cdk17         |
| 0.263728726  | 0.1565715   | 1.17E-05 | 0 | Dctn4         |
| 0.380808977  | 0.157002196 | 1.18E-05 | 0 | Ptrhd1        |
| 0.48772309   | 0.159249168 | 1.19E-05 | 0 | Ap5s1         |
| -0.652625983 | 0.15952194  | 1.19E-05 | 0 | Mdp1          |
| 0.473631778  | 0.164144556 | 1.23E-05 | 0 | Sec11a        |
| 0.258335385  | 0.164287006 | 1.23E-05 | 0 | 1110008F13Rik |
| 0.399502423  | 0.167565315 | 1.25E-05 | 0 | Ptgr1         |
| -0.587596894 | 0.168708392 | 1.26E-05 | 0 | Cd33          |
| -0.556216298 | 0.169081479 | 1.27E-05 | 0 | Rapgef2       |
| 0.339601362  | 0.174977157 | 1.31E-05 | 0 | Hsd17b10      |
| -0.654104317 | 0.176394367 | 1.32E-05 | 0 | Cttnbp2nl     |
| 0.252716423  | 0.176429279 | 1.32E-05 | 0 | Chmp1b        |
| -0.402954131 | 0.178595754 | 1.34E-05 | 0 | Fam129a       |
| 0.432822808  | 0.1808427   | 1.35E-05 | 0 | Tmem184b      |
| 0.283542716  | 0.181494522 | 1.36E-05 | 0 | Sar1a         |
| 0.36772478   | 0.183602265 | 1.38E-05 | 0 | Elof1         |
| 0.331049209  | 0.188881203 | 1.41E-05 | 0 | Sptlc2        |
| -0.679028073 | 0.19044664  | 1.43E-05 | 0 | Ap2a2         |
| 0.398308449  | 0.19183452  | 1.44E-05 | 0 | Rfc2          |
| 0.259611943  | 0.195481875 | 1.46E-05 | 0 | Edf1          |
| 0.312304412  | 0.206200536 | 1.54E-05 | 0 | Tmed7         |
| 0.410958963  | 0.21199992  | 1.59E-05 | 0 | Mcee          |
| -0.669239194 | 0.221201913 | 1.66E-05 | 0 | Adam15        |
| 0.32494518   | 0.229348527 | 1.72E-05 | 0 | Psmd6         |
| -0.606864235 | 0.229651725 | 1.72E-05 | 0 | Apc           |
| 0.362152481  | 0.242493787 | 1.82E-05 | 0 | Naglu         |
| -0.444202692 | 0.246936236 | 1.85E-05 | 0 | 2410006H16Rik |
| 0.68307329   | 0.256565332 | 1.92E-05 | 0 | Chst11        |
| 0.367482493  | 0.262665892 | 1.97E-05 | 0 | Mgat2         |
| 0.376486377  | 0.265786273 | 1.99E-05 | 0 | Edem1         |
| 0.477919353  | 0.267610724 | 2.00E-05 | 0 | Dctn6         |
| 0.459298362  | 0.27034981  | 2.02E-05 | 0 | Pgls          |
| 0.333682736  | 0.270583243 | 2.03E-05 | 0 | Prep          |
| -0.30315736  | 0.27137535  | 2.03E-05 | 0 | Lsp1          |
| -0.651284813 | 0.272704788 | 2.04E-05 | 0 | Trib1         |
| -0.571871434 | 0.275024711 | 2.06E-05 | 0 | Fosb          |
| 0.324768173  | 0.279653417 | 2.09E-05 | 0 | Rpl19         |
| -0.713641604 | 0.29378715  | 2.20E-05 | 0 | Samd9l        |
| -0.303924578 | 0.297973711 | 2.23E-05 | 0 | Rpl13a        |
| 0.305279239  | 0.302269115 | 2.26E-05 | 0 | Mapk3         |
| 0.360645383  | 0.309810093 | 2.32E-05 | 0 | Micu2         |
| 0.269308752  | 0.318967192 | 2.39E-05 | 0 | Etfb          |
| 0.279579467  | 0.323708514 | 2.42E-05 | 0 | Acaa1a        |
| 0.3796786    | 0.323818904 | 2.43E-05 | 0 | Nubp1         |
| -0.827428708 | 0.324524148 | 2.43E-05 | 0 | Foxn3         |
| 0.273444327  | 0.327987201 | 2.46E-05 | 0 | Ndufa2        |

|              |             |          |   |          |
|--------------|-------------|----------|---|----------|
| 0.335397126  | 0.330026127 | 2.47E-05 | 0 | Leprotl1 |
| 0.411483602  | 0.334539158 | 2.51E-05 | 0 | Ubac1    |
| -0.624369256 | 0.338167274 | 2.53E-05 | 0 | Rasa1    |
| 0.359277353  | 0.341788807 | 2.56E-05 | 0 | Tor2a    |
| -0.400217968 | 0.341889523 | 2.56E-05 | 0 | Fmn1     |
| 0.30424546   | 0.342707558 | 2.57E-05 | 0 | Ythdf3   |
| 0.523328024  | 0.342800257 | 2.57E-05 | 0 | Enoph1   |
| 0.402298968  | 0.363847114 | 2.73E-05 | 0 | Tmem86a  |
| 0.31796721   | 0.368558964 | 2.76E-05 | 0 | Tatdn2   |
| -0.332118917 | 0.374665217 | 2.81E-05 | 0 | Atf3     |
| 0.43900791   | 0.390636163 | 2.93E-05 | 0 | Il11ra1  |
| -0.268258704 | 0.390935847 | 2.93E-05 | 0 | Mir22hg  |
| 0.394105596  | 0.395205703 | 2.96E-05 | 0 | Senp5    |
| 0.389884044  | 0.433872328 | 3.25E-05 | 0 | Gm12942  |
| 0.421217237  | 0.435966347 | 3.27E-05 | 0 | Cnih1    |
| 0.302565564  | 0.439788329 | 3.29E-05 | 0 | Galc     |
| 0.260606972  | 0.442129437 | 3.31E-05 | 0 | Elp5     |
| 0.376886887  | 0.448803934 | 3.36E-05 | 0 | Cnot4    |
| 0.286205633  | 0.455531107 | 3.41E-05 | 0 | Stx3     |
| 0.40451005   | 0.455975088 | 3.42E-05 | 0 | Rce1     |
| 0.406018873  | 0.458441355 | 3.43E-05 | 0 | Rps6ka4  |
| -0.26769686  | 0.46433907  | 3.48E-05 | 0 | Mex3c    |
| 0.306526296  | 0.472477553 | 3.54E-05 | 0 | Imp4     |
| 0.26755383   | 0.479890871 | 3.59E-05 | 0 | Plekhj1  |
| -0.556272083 | 0.48289234  | 3.62E-05 | 0 | Creb5    |
| 0.637840189  | 0.483522796 | 3.62E-05 | 0 | Slc30a1  |
| 0.30184786   | 0.486786973 | 3.65E-05 | 0 | Fundc2   |
| -0.926443015 | 0.504831699 | 3.78E-05 | 0 | Nfxl1    |
| -0.738133687 | 0.507007434 | 3.80E-05 | 0 | Mt2      |
| 0.256294241  | 0.523519435 | 3.92E-05 | 0 | Tmem141  |
| 0.458458722  | 0.537117891 | 4.02E-05 | 0 | Lypla1   |
| 0.355151692  | 0.538251805 | 4.03E-05 | 0 | Hopx     |
| -0.62169939  | 0.54574966  | 4.09E-05 | 0 | Gas7     |
| 0.276550651  | 0.546640717 | 4.09E-05 | 0 | Mettl7a1 |
| 0.336034659  | 0.551072075 | 4.13E-05 | 0 | Ccng1    |
| 0.251388107  | 0.571406083 | 4.28E-05 | 0 | Mrpl50   |
| 0.327193573  | 0.578470236 | 4.33E-05 | 0 | Map4k3   |
| 0.347656994  | 0.588223511 | 4.41E-05 | 0 | Arpc3    |
| -0.704277019 | 0.601633622 | 4.51E-05 | 0 | Zfhx3    |
| -0.99125043  | 0.609460991 | 4.56E-05 | 0 | Nfia     |
| -0.773550401 | 0.614837784 | 4.60E-05 | 0 | Arsb     |
| -0.333395553 | 0.615973693 | 4.61E-05 | 0 | Rpl29    |
| -0.423102404 | 0.61967028  | 4.64E-05 | 0 | Cep170   |
| -0.724702198 | 0.620685395 | 4.65E-05 | 0 | Bmp2k    |
| 0.259273784  | 0.632597526 | 4.74E-05 | 0 | Arl11    |
| -0.479694395 | 0.64712854  | 4.85E-05 | 0 | Rnase4   |
| 0.285643655  | 0.661174048 | 4.95E-05 | 0 | Frrs1    |
| 0.258901153  | 0.662029201 | 4.96E-05 | 0 | Cyb5     |
| 0.292011384  | 0.670980324 | 5.03E-05 | 0 | Glrx5    |
| 0.413259612  | 0.67143584  | 5.03E-05 | 0 | Zfp260   |
| 0.251192176  | 0.68742006  | 5.15E-05 | 0 | Tmem179b |
| -0.822206092 | 0.704235525 | 5.27E-05 | 0 | Bmyc     |
| -0.5652978   | 0.709862107 | 5.32E-05 | 0 | Cep250   |
| 0.514721964  | 0.718508545 | 5.38E-05 | 0 | Lmf1     |
| -0.63478285  | 0.752234508 | 5.63E-05 | 0 | Mtmr12   |
| -0.942285445 | 0.778303825 | 5.83E-05 | 0 | Gins4    |
| 0.426612643  | 0.780146047 | 5.84E-05 | 0 | Cyb5r1   |
| 0.276276712  | 0.784613153 | 5.88E-05 | 0 | Prkaa1   |
| 0.379204229  | 0.787778385 | 5.90E-05 | 0 | Mrpl35   |
| 0.276391303  | 0.789902558 | 5.92E-05 | 0 | Glrx     |
| 0.273724657  | 0.804771633 | 6.03E-05 | 0 | Psmd10   |

|              |             |           |   |               |
|--------------|-------------|-----------|---|---------------|
| -0.556417664 | 0.807039409 | 6.04E-05  | 0 | Epsti1        |
| -0.513468088 | 0.808678157 | 6.06E-05  | 0 | Clip1         |
| 0.290854125  | 0.809762313 | 6.06E-05  | 0 | Ndufa12       |
| 0.320350238  | 0.821641864 | 6.15E-05  | 0 | Gab1          |
| -0.47169482  | 0.825668089 | 6.18E-05  | 0 | Adap2         |
| -0.740047042 | 0.829508681 | 6.21E-05  | 0 | P2ry12        |
| -0.465069574 | 0.834080268 | 6.25E-05  | 0 | Gadd45g       |
| 0.307059472  | 0.843491755 | 6.32E-05  | 0 | Bcl2l13       |
| 0.542500994  | 0.844230559 | 6.32E-05  | 0 | Dgkz          |
| 0.469978146  | 0.862601463 | 6.46E-05  | 0 | Amdhd2        |
| -0.698631841 | 0.874657535 | 6.55E-05  | 0 | 2610507B11Rik |
| -0.624437588 | 0.877049269 | 6.57E-05  | 0 | 1700025G04Rik |
| -0.380833821 | 0.898746941 | 6.73E-05  | 0 | Kctd12        |
| -0.532372878 | 0.938592709 | 7.03E-05  | 0 | Jdp2          |
| 0.411846341  | 0.951447242 | 7.13E-05  | 0 | Rufy3         |
| 0.450054834  | 0.96195572  | 7.20E-05  | 0 | Mrpl55        |
| -0.630418694 | 0.962785631 | 7.21E-05  | 0 | Luc7l         |
| 0.575190136  | 0.963154506 | 7.21E-05  | 0 | Sestd1        |
| 0.263190901  | 0.970333422 | 7.27E-05  | 0 | Pstpip1       |
| 0.342003345  | 0.989511963 | 7.41E-05  | 0 | Glb1          |
| -0.550003897 | 1           | 7.66E-05  | 0 | Il10ra        |
| -0.572877248 | 1           | 7.70E-05  | 0 | Ivns1abp      |
| 0.482139058  | 1           | 7.78E-05  | 0 | Slc35b1       |
| -0.418685462 | 1           | 7.87E-05  | 0 | Ccl7          |
| 0.328032607  | 1           | 7.90E-05  | 0 | Plekhm2       |
| -0.511969283 | 1           | 7.90E-05  | 0 | Acap2         |
| 0.571634436  | 1           | 8.03E-05  | 0 | Brix1         |
| 0.44812846   | 1           | 8.05E-05  | 0 | Snx27         |
| -0.644436795 | 1           | 8.12E-05  | 0 | Prune2        |
| 0.322094515  | 1           | 8.13E-05  | 0 | Kxd1          |
| 0.335330007  | 1           | 8.20E-05  | 0 | Rnf5          |
| -0.303115562 | 1           | 8.32E-05  | 0 | Hexb          |
| 0.257962354  | 1           | 8.37E-05  | 0 | Vps28         |
| -0.714278787 | 1           | 8.47E-05  | 0 | Trak1         |
| 0.346868286  | 1           | 8.68E-05  | 0 | Dock5         |
| -0.433704062 | 1           | 8.82E-05  | 0 | Lbr           |
| -0.663341902 | 1           | 8.85E-05  | 0 | Akap8l        |
| 0.391462245  | 1           | 8.94E-05  | 0 | Tusc2         |
| -0.775686076 | 1           | 9.13E-05  | 0 | Abcb1b        |
| 0.50418292   | 1           | 9.14E-05  | 0 | Trnt1         |
| -0.736325002 | 1           | 9.17E-05  | 0 | Cyp27a1       |
| -1.066459341 | 1           | 9.52E-05  | 0 | Fgfr1         |
| 0.327187154  | 1           | 9.53E-05  | 0 | Plekhm1       |
| 0.347801628  | 1           | 9.53E-05  | 0 | Dpp7          |
| 0.298270278  | 1           | 9.56E-05  | 0 | Pdxk          |
| -0.541999311 | 1           | 9.76E-05  | 0 | Noc2l         |
| 0.368905362  | 1           | 9.96E-05  | 0 | Gatad2a       |
| -0.825181837 | 1           | 0.0001006 | 0 | Bbx           |
| 0.427603435  | 1           | 0.0001029 | 0 | Bloc1s6       |
| -0.384639308 | 1           | 0.0001032 | 0 | Rgs2          |
| -0.531488469 | 1           | 0.0001037 | 0 | Brd4          |
| 0.282557762  | 1           | 0.000105  | 0 | Mrpl51        |
| -0.570731423 | 1           | 0.0001059 | 0 | Baz1b         |
| 0.633940995  | 1           | 0.000106  | 0 | Mefv          |
| 0.368171103  | 1           | 0.0001071 | 0 | Pik3cb        |
| -0.428376218 | 1           | 0.0001074 | 0 | Golgb1        |
| 0.40506117   | 1           | 0.0001077 | 0 | Qpct          |
| 0.519774083  | 1           | 0.0001081 | 0 | Rnf7          |
| 0.283396587  | 1           | 0.0001102 | 0 | Pno1          |
| 0.266746915  | 1           | 0.0001139 | 0 | Mrpl10        |
| 0.396354411  | 1           | 0.0001164 | 0 | Ufm1          |

|              |   |           |   |          |
|--------------|---|-----------|---|----------|
| -0.640289378 | 1 | 0.0001206 | 0 | Serpinb8 |
| -0.700276581 | 1 | 0.0001233 | 0 | Kansl1l  |
| 0.309798869  | 1 | 0.0001249 | 0 | Gm12060  |
| 0.393186834  | 1 | 0.0001259 | 0 | Egln1    |
| -0.530508792 | 1 | 0.0001273 | 0 | Smarca2  |
| -0.270272483 | 1 | 0.0001306 | 0 | Rps21    |
| -0.663799284 | 1 | 0.000138  | 0 | Tmcc3    |
| 0.294815442  | 1 | 0.0001402 | 0 | Tmx1     |
| -0.336676972 | 1 | 0.0001426 | 0 | Ifitm3   |
| 0.318613326  | 1 | 0.0001432 | 0 | Nubp2    |
| 0.263924523  | 1 | 0.0001461 | 0 | Isca2    |
| 0.279101497  | 1 | 0.0001503 | 0 | Npepps   |
| -0.910555399 | 1 | 0.0001509 | 0 | Mndal    |
| 0.258841515  | 1 | 0.0001524 | 0 | Yipf6    |
| -0.56706949  | 1 | 0.0001532 | 0 | Casc3    |
| -0.456184037 | 1 | 0.0001547 | 0 | Pros1    |
| 0.288216175  | 1 | 0.0001581 | 0 | Cars     |
| -0.553593103 | 1 | 0.0001593 | 0 | Smc1a    |
| -0.328140628 | 1 | 0.0001596 | 0 | Spred1   |
| -0.633568559 | 1 | 0.0001603 | 0 | Ogfrl1   |
| -0.264286767 | 1 | 0.0001611 | 0 | Nlrp3    |
| 0.328305976  | 1 | 0.0001632 | 0 | Hcst     |
| 0.379486165  | 1 | 0.0001642 | 0 | Casp1    |
| -0.330471053 | 1 | 0.0001667 | 0 | Irf2bp2  |
| 0.296985932  | 1 | 0.0001689 | 0 | Gas2l3   |
| 0.35148147   | 1 | 0.0001717 | 0 | Mapkapk5 |
| -0.661572518 | 1 | 0.0001723 | 0 | Tmem71   |
| -1.000053278 | 1 | 0.0001745 | 0 | Gbp7     |
| -1.201903664 | 1 | 0.0001768 | 0 | Bank1    |
| 0.360212885  | 1 | 0.0001793 | 0 | Timm10b  |
| 0.263880011  | 1 | 0.0001809 | 0 | Hnrnpd   |
| 0.25013722   | 1 | 0.0001875 | 0 | Man2b2   |
| 0.264981201  | 1 | 0.0001879 | 0 | Idua     |
| 0.417365384  | 1 | 0.0001894 | 0 | Emc4     |
| 0.417559837  | 1 | 0.0001914 | 0 | Atp11b   |
| -0.672109869 | 1 | 0.0001922 | 0 | Ccdc22   |
| 0.314444172  | 1 | 0.0001963 | 0 | Comtd1   |
| 0.362923314  | 1 | 0.0001965 | 0 | Golph3l  |
| -0.639385196 | 1 | 0.0002016 | 0 | Tbc1d9b  |
| -0.343545043 | 1 | 0.000204  | 0 | Hcls1    |
| -0.635230152 | 1 | 0.0002049 | 0 | Zfp513   |
| 0.376772464  | 1 | 0.0002053 | 0 | Snrpa1   |
| -0.651997382 | 1 | 0.0002103 | 0 | Agpat6   |
| 0.399903448  | 1 | 0.000215  | 0 | Inf2     |
| 0.389150364  | 1 | 0.0002152 | 0 | Akr1b8   |
| 0.261389435  | 1 | 0.0002162 | 0 | Tor1aip2 |
| 0.360792055  | 1 | 0.0002216 | 0 | Vps54    |
| -0.828949693 | 1 | 0.0002239 | 0 | Ppfia4   |
| 0.256365446  | 1 | 0.0002254 | 0 | Rcbtb2   |
| 0.405500158  | 1 | 0.0002334 | 0 | Srxn1    |
| 0.332037938  | 1 | 0.0002335 | 0 | Aip      |
| 0.49986473   | 1 | 0.0002357 | 0 | Plgrkt   |
| -0.289745673 | 1 | 0.000239  | 0 | Ly86     |
| 0.255883208  | 1 | 0.0002395 | 0 | Pon3     |
| 0.304044434  | 1 | 0.0002408 | 0 | Ppp6c    |
| 0.376491048  | 1 | 0.0002472 | 0 | Psmb7    |
| 0.254670871  | 1 | 0.0002497 | 0 | Slc38a6  |
| 0.303620933  | 1 | 0.000261  | 0 | Wdr41    |
| 0.300065083  | 1 | 0.0002626 | 0 | Pgk1     |
| -0.744670723 | 1 | 0.0002634 | 0 | Adrb2    |
| -0.361899768 | 1 | 0.0002634 | 0 | P2rx7    |

|              |   |           |   |         |
|--------------|---|-----------|---|---------|
| 0.598960284  | 1 | 0.0002706 | 0 | Gipc1   |
| -0.52183751  | 1 | 0.0002784 | 0 | Slc2a6  |
| -0.565926531 | 1 | 0.0002811 | 0 | Wwp1    |
| -0.576174809 | 1 | 0.0002817 | 0 | Xrn1    |
| 0.361515911  | 1 | 0.0002818 | 0 | Ict1    |
| 0.316221396  | 1 | 0.0002847 | 0 | Triap1  |
| 0.426960761  | 1 | 0.0002868 | 0 | Tspan5  |
| 0.266088396  | 1 | 0.0003016 | 0 | Tmem14c |
| -0.463599974 | 1 | 0.0003024 | 0 | Aes     |
| -1.03700168  | 1 | 0.0003066 | 0 | Batf3   |
| 0.344415731  | 1 | 0.000307  | 0 | Rad23a  |
| 0.259725484  | 1 | 0.0003071 | 0 | Agpat2  |
| -0.702761796 | 1 | 0.0003203 | 0 | Elf1    |
| -0.569973451 | 1 | 0.0003213 | 0 | Ythdc1  |
| 0.292336565  | 1 | 0.0003272 | 0 | Tmem33  |
| -1.063421043 | 1 | 0.0003308 | 0 | Top2a   |
| -0.300675247 | 1 | 0.000334  | 0 | Macf1   |
| 0.615951759  | 1 | 0.0003351 | 0 | Cstf3   |
| -0.620540437 | 1 | 0.0003364 | 0 | Aak1    |
| 0.406448862  | 1 | 0.0003372 | 0 | Nfil3   |
| -0.830165384 | 1 | 0.0003404 | 0 | Pcnt    |
| 0.301216314  | 1 | 0.0003435 | 0 | Srp19   |
| 0.255560247  | 1 | 0.0003478 | 0 | Prorsd1 |
| -0.420106566 | 1 | 0.0003547 | 0 | Dek     |
| -0.607138629 | 1 | 0.0003624 | 0 | Smc6    |
| -0.604823595 | 1 | 0.0003684 | 0 | Eps15   |
| 0.345738131  | 1 | 0.000369  | 0 | Lgals8  |
| -0.445261932 | 1 | 0.0003719 | 0 | Nfkb1   |
| 0.269502393  | 1 | 0.0003763 | 0 | Txndc9  |
| 0.305067016  | 1 | 0.0003785 | 0 | Mrps7   |
| -0.720422324 | 1 | 0.0003825 | 0 | Zfp68   |
| 0.263580981  | 1 | 0.0003914 | 0 | Vps25   |
| 0.273563031  | 1 | 0.0004056 | 0 | Babam1  |
| 0.293695411  | 1 | 0.0004245 | 0 | Mif     |
| 0.288498881  | 1 | 0.0004256 | 0 | Mrpl24  |
| -0.482371122 | 1 | 0.0004325 | 0 | Vrk1    |
| -0.349848312 | 1 | 0.000436  | 0 | Dock8   |
| -0.493815463 | 1 | 0.0004364 | 0 | Lrmp    |
| -0.627909198 | 1 | 0.000437  | 0 | Ophn1   |
| -0.344874848 | 1 | 0.0004468 | 0 | Trmt1   |
| -0.485386664 | 1 | 0.0004533 | 0 | Hivep1  |
| -0.528304412 | 1 | 0.0004635 | 0 | P2ry6   |
| 0.474559678  | 1 | 0.0004674 | 0 | Sik3    |
| -0.493190278 | 1 | 0.0004769 | 0 | Dclre1c |
| 0.261638189  | 1 | 0.0004778 | 0 | Ttc7    |
| -0.504963088 | 1 | 0.0004939 | 0 | Glg1    |
| -0.600040748 | 1 | 0.0004959 | 0 | Slc4a7  |
| -0.544783387 | 1 | 0.0005021 | 0 | Exoc6b  |
| -0.698783126 | 1 | 0.0005063 | 0 | Rnf216  |
| -0.557221883 | 1 | 0.0005121 | 0 | Peli1   |
| -0.479109865 | 1 | 0.0005232 | 0 | Sema4a  |
| -0.514052275 | 1 | 0.0005232 | 0 | Csk     |
| -0.674147039 | 1 | 0.0005309 | 0 | Swap70  |
| -0.424467902 | 1 | 0.0005313 | 0 | Cxcl1   |
| 0.315923525  | 1 | 0.0005337 | 0 | Dpcd    |
| 0.26984628   | 1 | 0.0005343 | 0 | Sfxn1   |
| -0.379141804 | 1 | 0.0005351 | 0 | Brd2    |
| 0.26869076   | 1 | 0.0005398 | 0 | Timm17b |
| 0.305565231  | 1 | 0.0005405 | 0 | Ndufs1  |
| 0.559742563  | 1 | 0.0005501 | 0 | Sdhaf2  |
| 0.297069994  | 1 | 0.0005543 | 0 | Cebpzoz |



|              |   |           |   |               |
|--------------|---|-----------|---|---------------|
| -0.686126972 | 1 | 0.0005562 | 0 | Acvrl1        |
| -0.582596082 | 1 | 0.0005777 | 0 | Tnfaip8       |
| 0.291752331  | 1 | 0.0005886 | 0 | Nol12         |
| 0.347546233  | 1 | 0.0005914 | 0 | Rai14         |
| 0.398905774  | 1 | 0.0005956 | 0 | Eaf1          |
| -0.765923933 | 1 | 0.0006016 | 0 | Per1          |
| 0.675345831  | 1 | 0.0006071 | 0 | Pop7          |
| -0.286570652 | 1 | 0.0006086 | 0 | Aim2          |
| -0.716349116 | 1 | 0.0006118 | 0 | Pygo2         |
| -0.594027448 | 1 | 0.000614  | 0 | Man1a         |
| -0.400559867 | 1 | 0.0006219 | 0 | Pcp4l1        |
| 0.725894129  | 1 | 0.0006318 | 0 | Arrdc4        |
| -0.691874353 | 1 | 0.0006393 | 0 | Ebi3          |
| -0.572401128 | 1 | 0.0006433 | 0 | Uvrag         |
| -0.499509965 | 1 | 0.0006756 | 0 | Plrg1         |
| -0.516973462 | 1 | 0.0006878 | 0 | Pdlim1        |
| 0.279946883  | 1 | 0.0006917 | 0 | Psme3         |
| -0.467931057 | 1 | 0.0006986 | 0 | Sp110         |
| 0.308725463  | 1 | 0.0007018 | 0 | Dnpep         |
| 0.465681339  | 1 | 0.0007122 | 0 | 1110057K04Rik |
| 0.490839967  | 1 | 0.0007219 | 0 | Med10         |
| -0.806490335 | 1 | 0.0007527 | 0 | Cwf19l2       |
| -0.432157422 | 1 | 0.0007537 | 0 | Nsmce1        |
| 0.457716645  | 1 | 0.0007552 | 0 | Exosc9        |
| -0.417194841 | 1 | 0.000772  | 0 | Fnbp1         |
| 0.333311336  | 1 | 0.0007941 | 0 | Pafah1b2      |
| 0.312998539  | 1 | 0.0007941 | 0 | Dnttip1       |
| 0.335431547  | 1 | 0.0007945 | 0 | Zfp148        |
| 0.289890318  | 1 | 0.0008003 | 0 | Lamtor3       |
| 0.29288158   | 1 | 0.0008138 | 0 | Ncbp1         |
| -0.514679362 | 1 | 0.0008307 | 0 | Ccdc88b       |
| 0.372911357  | 1 | 0.0008609 | 0 | Emc6          |
| -0.610250842 | 1 | 0.0008798 | 0 | Arrb1         |
| -0.282783466 | 1 | 0.0008807 | 0 | Atrx          |
| -0.528611032 | 1 | 0.0008869 | 0 | Phactr4       |
| 0.273764466  | 1 | 0.0008959 | 0 | Ggta1         |
| 0.438169949  | 1 | 0.0009092 | 0 | Samm50        |
| -0.825602501 | 1 | 0.0009303 | 0 | Pla2g4a       |
| -0.545521084 | 1 | 0.0009381 | 0 | Plbd1         |
| -0.615752394 | 1 | 0.0009594 | 0 | Tnrc18        |
| 0.252699204  | 1 | 0.0009635 | 0 | Haghl         |
| 0.329030742  | 1 | 0.000996  | 0 | Ift46         |
| 0.339236535  | 1 | 0.0009961 | 0 | Hs2st1        |
| 0.317695489  | 1 | 0.0009992 | 0 | Psmc5         |
| -0.586850273 | 1 | 0.0010032 | 0 | Coro7         |
| -0.577637944 | 1 | 0.0010052 | 0 | Tbc1d5        |
| 0.25032954   | 1 | 0.0010137 | 0 | Tmem126a      |
| 0.343166477  | 1 | 0.0010188 | 0 | Nkiras2       |
| 0.266772061  | 1 | 0.0010294 | 0 | Cdc34         |
| -0.631861909 | 1 | 0.0010415 | 0 | Dpysl2        |
| 0.346530988  | 1 | 0.0010444 | 0 | Srprb         |
| 0.53539457   | 1 | 0.0010624 | 0 | Mrpl32        |
| -0.263978645 | 1 | 0.0010707 | 0 | Ddx3x         |
| 0.268124065  | 1 | 0.001089  | 0 | Rnf41         |
| -0.272612629 | 1 | 0.0011245 | 0 | Atp2b1        |
| -0.591128126 | 1 | 0.0011297 | 0 | Def6          |
| 0.265709537  | 1 | 0.0011553 | 0 | Ccdc127       |
| -0.621266904 | 1 | 0.0011768 | 0 | Ccdc50        |
| -0.379065384 | 1 | 0.001179  | 0 | Sp3           |
| -0.684857959 | 1 | 0.0011867 | 0 | Batf          |
| 0.322192634  | 1 | 0.0012328 | 0 | Uso1          |

|              |   |           |   |               |
|--------------|---|-----------|---|---------------|
| 0.555009404  | 1 | 0.001237  | 0 | Galk2         |
| -1.274827607 | 1 | 0.0012733 | 0 | Mgp           |
| -0.290175247 | 1 | 0.0012757 | 0 | Lcp2          |
| -0.546708156 | 1 | 0.0012782 | 0 | Camk1d        |
| -0.52040718  | 1 | 0.0012879 | 0 | Dennd5a       |
| 0.576343001  | 1 | 0.0012901 | 0 | 0610010F05Rik |
| -0.462672471 | 1 | 0.001302  | 0 | Snx20         |
| 0.265381953  | 1 | 0.0013163 | 0 | Rtfdc1        |
| 0.279547696  | 1 | 0.0013285 | 0 | Deb1          |
| 0.257485532  | 1 | 0.0013328 | 0 | Unc50         |
| -0.437850682 | 1 | 0.0013358 | 0 | Sec24b        |
| 0.332369154  | 1 | 0.0013394 | 0 | Vapb          |
| 0.327250514  | 1 | 0.0013617 | 0 | Mrpl27        |
| -0.292513816 | 1 | 0.0013622 | 0 | Ly6e          |
| 0.253803976  | 1 | 0.001369  | 0 | Mroh1         |
| 0.347225113  | 1 | 0.0013693 | 0 | Atp11a        |
| -0.815316688 | 1 | 0.0013838 | 0 | Ip6k1         |
| -0.671140519 | 1 | 0.001392  | 0 | Gtpbp1        |
| -0.469772724 | 1 | 0.0013987 | 0 | Errfi1        |
| 0.350204934  | 1 | 0.0014424 | 0 | Ergic1        |
| -0.451369114 | 1 | 0.0014527 | 0 | Smad1         |
| -0.435841011 | 1 | 0.0014625 | 0 | Fam168a       |
| -0.847926579 | 1 | 0.0014725 | 0 | P2ry10        |
| -0.262844707 | 1 | 0.001477  | 0 | Pfdn5         |
| -0.443940515 | 1 | 0.0014918 | 0 | Zbtb2         |
| -0.667709225 | 1 | 0.001519  | 0 | Enox2         |
| -0.307138875 | 1 | 0.0015242 | 0 | Inpp5b        |
| -0.621484625 | 1 | 0.0015668 | 0 | Lacc1         |
| 0.308072637  | 1 | 0.0015999 | 0 | Ttc7b         |
| 0.308459883  | 1 | 0.0016226 | 0 | Golph3        |
| -0.601200771 | 1 | 0.0016241 | 0 | Pcna          |
| -0.28797882  | 1 | 0.001627  | 0 | Lpcat2        |
| -0.403149311 | 1 | 0.0016302 | 0 | Slc15a4       |
| -0.541228836 | 1 | 0.0016403 | 0 | Hfe           |
| -0.642501644 | 1 | 0.0016606 | 0 | Mcm6          |
| -0.325284196 | 1 | 0.0016614 | 0 | Tmem63a       |
| 0.324655909  | 1 | 0.0017211 | 0 | Klhdc4        |
| -0.544155519 | 1 | 0.0017396 | 0 | Zcchc11       |
| -0.481596262 | 1 | 0.0017776 | 0 | Grk6          |
| 0.262938173  | 1 | 0.0017857 | 0 | Llph          |
| 0.258861634  | 1 | 0.0018006 | 0 | Csrp2bp       |
| -0.548596583 | 1 | 0.0018267 | 0 | Tmem109       |
| -0.516714907 | 1 | 0.0018368 | 0 | Fhl3          |
| -0.827858105 | 1 | 0.0018529 | 0 | Glcci1        |
| 0.306608194  | 1 | 0.0018635 | 0 | Rars          |
| -0.593422674 | 1 | 0.0018895 | 0 | Pak1          |
| 0.253366408  | 1 | 0.0018951 | 0 | Chmp4b        |
| 0.298219462  | 1 | 0.0019185 | 0 | Rbms1         |
| -0.690801795 | 1 | 0.0019211 | 0 | Sgpp1         |
| -0.584958763 | 1 | 0.0019444 | 0 | Trip10        |
| -0.462155696 | 1 | 0.0019581 | 0 | Mknk1         |
| -0.266308597 | 1 | 0.002036  | 0 | Cyth4         |
| 0.312454913  | 1 | 0.0021126 | 0 | Yrdc          |
| -0.418887865 | 1 | 0.002147  | 0 | Ctbp2         |
| -0.494468972 | 1 | 0.0021813 | 0 | Dctpp1        |
| -0.507587699 | 1 | 0.0021941 | 0 | Sorbs3        |
| 0.267568462  | 1 | 0.0022056 | 0 | Rpl35         |
| -0.445742191 | 1 | 0.0022138 | 0 | Prkacb        |
| 0.268330108  | 1 | 0.0022354 | 0 | Ndufb4        |
| 0.358547107  | 1 | 0.0022496 | 0 | Adi1          |
| -0.461129664 | 1 | 0.002253  | 0 | Uba7          |

|              |   |           |   |               |
|--------------|---|-----------|---|---------------|
| 0.26026916   | 1 | 0.0022757 | 0 | Znrf1         |
| -0.776176223 | 1 | 0.0023094 | 0 | Zmynd15       |
| 0.358430414  | 1 | 0.0023159 | 0 | Slc31a1       |
| 0.326879923  | 1 | 0.00232   | 0 | Akr7a5        |
| 0.416649701  | 1 | 0.0023604 | 0 | Nqo2          |
| -0.517764439 | 1 | 0.0023716 | 0 | Oxsr1         |
| -0.496168497 | 1 | 0.0024193 | 0 | Snx2          |
| -0.439590781 | 1 | 0.0024236 | 0 | Kmt2e         |
| -0.523074462 | 1 | 0.0024285 | 0 | Hivep2        |
| -0.506909985 | 1 | 0.0024319 | 0 | Phf20         |
| 0.559999293  | 1 | 0.0024394 | 0 | Ubxn8         |
| 0.285668911  | 1 | 0.0024488 | 0 | Arfp1         |
| -0.441936825 | 1 | 0.0024652 | 0 | Zcchc6        |
| 0.296791238  | 1 | 0.002468  | 0 | Mrps26        |
| -0.402297337 | 1 | 0.0024834 | 0 | Stap1         |
| 0.474141568  | 1 | 0.0025141 | 0 | B4galt3       |
| 0.338540851  | 1 | 0.0025299 | 0 | Bola3         |
| 0.330850315  | 1 | 0.0025701 | 0 | 1700123O20Rik |
| 0.278393459  | 1 | 0.0025712 | 0 | Tmem11        |
| 0.259314733  | 1 | 0.002574  | 0 | Galnt7        |
| -0.362261204 | 1 | 0.0026119 | 0 | Prps2         |
| -0.433815783 | 1 | 0.0026327 | 0 | 2810025M15Rik |
| -0.46968504  | 1 | 0.002645  | 0 | Itsn2         |
| 0.360119585  | 1 | 0.0027599 | 0 | Nlrc5         |
| -0.637031125 | 1 | 0.0027728 | 0 | Fam53b        |
| -0.45654561  | 1 | 0.0027759 | 0 | Acs1          |
| -0.538890435 | 1 | 0.0028244 | 0 | Frmd4a        |
| -0.274115135 | 1 | 0.0028538 | 0 | Ddx6          |
| -0.407527734 | 1 | 0.0028996 | 0 | Rbpj          |
| 0.375537678  | 1 | 0.002921  | 0 | Dock7         |
| -0.514379615 | 1 | 0.0030008 | 0 | Vps16         |
| 0.38973889   | 1 | 0.0030808 | 0 | Mrpl40        |
| 0.269534282  | 1 | 0.003084  | 0 | Btf3          |
| 0.571204448  | 1 | 0.0030848 | 0 | Phf8          |
| 0.375555619  | 1 | 0.0031303 | 0 | Mnat1         |
| -0.400227381 | 1 | 0.003198  | 0 | Aif1          |
| 0.280150099  | 1 | 0.0032208 | 0 | Nt5dc3        |
| 0.634401579  | 1 | 0.0032685 | 0 | Sdad1         |
| -0.419566842 | 1 | 0.0033668 | 0 | Bin1          |
| -0.45347116  | 1 | 0.0034355 | 0 | Mat2a         |
| -0.305411784 | 1 | 0.0034708 | 0 | Cnot1         |
| 0.531102133  | 1 | 0.0034811 | 0 | Nek6          |
| -0.514314367 | 1 | 0.0035034 | 0 | Yars          |
| -0.635777643 | 1 | 0.0035519 | 0 | Dnajb1        |
| -0.38374467  | 1 | 0.0035576 | 0 | Ubtf          |
| -0.509484211 | 1 | 0.0036104 | 0 | Rhob          |
| 0.486867628  | 1 | 0.0036846 | 0 | Abhd5         |
| 0.399075959  | 1 | 0.0036999 | 0 | Uri1          |
| 0.265205344  | 1 | 0.0037913 | 0 | Fbxo30        |
| 0.354003916  | 1 | 0.0038006 | 0 | Odc1          |
| -0.405233377 | 1 | 0.0038327 | 0 | Tmx4          |
| 0.267249476  | 1 | 0.0038414 | 0 | Cox19         |
| -0.573177379 | 1 | 0.0038562 | 0 | Ier2          |
| -0.632761242 | 1 | 0.0038641 | 0 | Sin3a         |
| -0.739789648 | 1 | 0.0038667 | 0 | Taf15         |
| -0.305970359 | 1 | 0.0039109 | 0 | Smndc1        |
| -0.402484105 | 1 | 0.0039263 | 0 | Rnf145        |
| -0.65461366  | 1 | 0.0039543 | 0 | Vps13a        |
| -0.29031555  | 1 | 0.0040221 | 0 | Ascc1         |
| -0.471320803 | 1 | 0.004029  | 0 | Cr1l          |
| 0.513125608  | 1 | 0.0040481 | 0 | Tsr1          |

|              |   |           |   |               |
|--------------|---|-----------|---|---------------|
| 0.272430049  | 1 | 0.0040585 | 0 | Scarb1        |
| -0.301053225 | 1 | 0.0040804 | 0 | Acss1         |
| -0.373733807 | 1 | 0.0041792 | 0 | Osgep         |
| -0.496709039 | 1 | 0.0041793 | 0 | Nav1          |
| 0.350560177  | 1 | 0.0042019 | 0 | Lamtor2       |
| -0.339523846 | 1 | 0.0042415 | 0 | Arhgap22      |
| 0.334506523  | 1 | 0.0043017 | 0 | Znrf2         |
| -0.533449726 | 1 | 0.0043162 | 0 | Eva1b         |
| 0.300358285  | 1 | 0.0043824 | 0 | Fam213b       |
| 0.407233319  | 1 | 0.0044227 | 0 | Uba3          |
| 0.271108862  | 1 | 0.0044455 | 0 | Sf3b4         |
| 0.26800315   | 1 | 0.0044655 | 0 | Ctnnbip1      |
| 0.363974362  | 1 | 0.004466  | 0 | Dram1         |
| -0.563268778 | 1 | 0.004502  | 0 | Smarca4       |
| -0.441981341 | 1 | 0.0046958 | 0 | Sec14l1       |
| 0.297362565  | 1 | 0.004808  | 0 | Prosc         |
| -0.350423342 | 1 | 0.0048121 | 0 | Mef2a         |
| -0.356480949 | 1 | 0.0048128 | 0 | Cpsf2         |
| -0.3385592   | 1 | 0.0048337 | 0 | Phactr2       |
| 0.25455191   | 1 | 0.0049097 | 0 | Mrpl57        |
| -0.467690046 | 1 | 0.0049641 | 0 | Fam134b       |
| -0.276043333 | 1 | 0.0050268 | 0 | Tpr           |
| -1.22701916  | 1 | 0.0050986 | 0 | Plxdc2        |
| 0.289527932  | 1 | 0.0051082 | 0 | Rspry1        |
| -0.53739072  | 1 | 0.0051336 | 0 | Arhgap12      |
| -0.56232899  | 1 | 0.0052111 | 0 | Eftud2        |
| -0.502397329 | 1 | 0.0052753 | 0 | Jade2         |
| -0.321713177 | 1 | 0.0054158 | 0 | Cct5          |
| -0.507088621 | 1 | 0.0054237 | 0 | E030024N20Rik |
| -0.46722276  | 1 | 0.0055019 | 0 | Uap1          |
| -0.258917418 | 1 | 0.0056551 | 0 | Hbs1l         |
| -0.996290521 | 1 | 0.0056719 | 0 | Ly6a          |
| -0.449303163 | 1 | 0.0058548 | 0 | Kmt2c         |
| -0.541468151 | 1 | 0.0058613 | 0 | Nr3c1         |
| 0.342329542  | 1 | 0.0059852 | 0 | Pdzd11        |
| -0.378965409 | 1 | 0.0060279 | 0 | Psmb8         |
| 0.375984861  | 1 | 0.0060453 | 0 | Rptor         |
| -0.628366587 | 1 | 0.0060574 | 0 | Cbfa2t3       |
| -0.33191762  | 1 | 0.0060634 | 0 | Rbbp8         |
| -0.494016981 | 1 | 0.0060802 | 0 | Kdm3b         |
| 0.266219029  | 1 | 0.0060914 | 0 | Tufm          |
| -0.64651655  | 1 | 0.0061667 | 0 | Cspp1         |
| -0.485159527 | 1 | 0.0063909 | 0 | Fam178a       |
| -0.46716159  | 1 | 0.0064376 | 0 | Nbeal1        |
| 0.385101729  | 1 | 0.0065849 | 0 | Zc3h12a       |
| 0.256105629  | 1 | 0.0066325 | 0 | Mvp           |
| -0.260659512 | 1 | 0.0070161 | 0 | Nars          |
| -0.511770369 | 1 | 0.0070478 | 0 | Cebpd         |
| -0.324734065 | 1 | 0.0070493 | 0 | Sltn          |
| -0.388657829 | 1 | 0.0070665 | 0 | Bcl6          |
| -0.445482773 | 1 | 0.0070765 | 0 | Ep300         |
| -0.255174018 | 1 | 0.0071074 | 0 | Rraga         |
| -0.4895127   | 1 | 0.007166  | 0 | Ddx41         |
| -0.640737989 | 1 | 0.0071681 | 0 | Arhgap18      |
| -0.482474962 | 1 | 0.0074961 | 0 | Relb          |
| -0.395446779 | 1 | 0.0076329 | 0 | Notch2        |
| -0.554671465 | 1 | 0.0077255 | 0 | Rere          |
| -0.40506747  | 1 | 0.0077319 | 0 | Pde4b         |
| -0.273876555 | 1 | 0.0077473 | 0 | Top1          |
| 0.47098096   | 1 | 0.0077501 | 0 | Msmo1         |
| -0.466139923 | 1 | 0.0080445 | 0 | Ralbp1        |

|              |          |           |   |               |
|--------------|----------|-----------|---|---------------|
| -0.797839281 | 1        | 0.0080549 | 0 | Apoe          |
| 0.322881986  | 1        | 0.0080628 | 0 | Ddrgk1        |
| -0.282028981 | 1        | 0.0081072 | 0 | Mir703        |
| -0.466149557 | 1        | 0.0081214 | 0 | Zfml          |
| 0.359048417  | 1        | 0.0081589 | 0 | Polr2b        |
| -0.480229183 | 1        | 0.0081709 | 0 | Brd3          |
| 0.392497621  | 1        | 0.0082546 | 0 | Abhd17c       |
| -0.51756482  | 1        | 0.0084362 | 0 | Ash1l         |
| -0.427935907 | 1        | 0.0084838 | 0 | Brd9          |
| 0.382609673  | 1        | 0.0085133 | 0 | Glr2          |
| -0.40288444  | 1        | 0.0085776 | 0 | Ptpa          |
| 0.319258666  | 1        | 0.0086215 | 0 | Gramd1b       |
| 0.421351841  | 1        | 0.0088134 | 0 | Tmem251       |
| -0.356512646 | 1        | 0.0089323 | 0 | Wdr48         |
| 0.274807866  | 1        | 0.0089744 | 0 | Rasa3         |
| -0.759477559 | 1        | 0.009119  | 0 | D16Ert472e    |
| -0.503384754 | 1        | 0.0091649 | 0 | Pabpn1        |
| -0.314230141 | 1        | 0.0091788 | 0 | Pik3c2a       |
| -0.25076218  | 1        | 0.0091835 | 0 | Gm6251        |
| -0.434167812 | 1        | 0.0091942 | 0 | Tmod3         |
| -0.400554535 | 1        | 0.0092694 | 0 | Vaultrc5      |
| -0.275202143 | 1        | 0.009293  | 0 | Mtmr10        |
| 0.25140719   | 1        | 0.0093062 | 0 | Fbxo22        |
| -0.554654749 | 1        | 0.0093271 | 0 | Rcan1         |
| -0.60487966  | 1        | 0.0095042 | 0 | Soga1         |
| -0.502927929 | 1        | 0.0095917 | 0 | Cep83         |
| -0.394210421 | 1        | 0.0096332 | 0 | Tcof1         |
| -0.794360424 | 1        | 0.0096935 | 0 | Dennd4a       |
| -0.488372166 | 1        | 0.0097958 | 0 | Arhgap15      |
| 0.325168366  | 1        | 0.0098141 | 0 | Lemd2         |
| -0.294561274 | 1        | 0.0099147 | 0 | Rac2          |
| -0.528722551 | 1        | 0.0099499 | 0 | Ankrd44       |
| -0.463610082 | 1        | 0.0099552 | 0 | Arid5a        |
| 0.80130862   | 1.53E-38 | 1.14E-42  | 1 | Cd74          |
| 0.846427568  | 1.34E-34 | 1.00E-38  | 1 | H2-Eb1        |
| 0.710850428  | 1.80E-30 | 1.35E-34  | 1 | H2-Ab1        |
| 0.972729251  | 1.41E-26 | 1.06E-30  | 1 | Ccl4          |
| 0.686657317  | 8.47E-26 | 6.35E-30  | 1 | H2-Aa         |
| -1.293094635 | 1.98E-22 | 1.48E-26  | 1 | Spp1          |
| -1.730985387 | 4.00E-20 | 3.00E-24  | 1 | Gpnm1         |
| -0.580040233 | 3.18E-19 | 2.38E-23  | 1 | Ctsd          |
| 1.003755776  | 5.53E-19 | 4.14E-23  | 1 | Ccl3          |
| -1.099077077 | 7.53E-19 | 5.64E-23  | 1 | Pld3          |
| -1.561728094 | 1.38E-18 | 1.03E-22  | 1 | Adam8         |
| -1.650421099 | 4.28E-18 | 3.21E-22  | 1 | Syng1         |
| -0.712613211 | 4.51E-18 | 3.38E-22  | 1 | Cstb          |
| -0.849074954 | 1.52E-17 | 1.14E-21  | 1 | Psmb6         |
| -1.362032921 | 2.30E-17 | 1.72E-21  | 1 | Il7r          |
| -0.757885954 | 9.28E-17 | 6.95E-21  | 1 | Rnh1          |
| 1.328646899  | 1.82E-16 | 1.36E-20  | 1 | Cxcl10        |
| 0.295880356  | 2.07E-16 | 1.55E-20  | 1 | Malat1        |
| -0.838518598 | 2.23E-16 | 1.67E-20  | 1 | Emp1          |
| -0.761336341 | 3.12E-16 | 2.33E-20  | 1 | Ndufc1        |
| -0.65269054  | 1.00E-15 | 7.50E-20  | 1 | 1110007C09Rik |
| 0.320161076  | 3.20E-15 | 2.40E-19  | 1 | C1qb          |
| 0.659043156  | 4.36E-15 | 3.26E-19  | 1 | Tmem176b      |
| -0.727492069 | 4.61E-15 | 3.45E-19  | 1 | 0610031J06Rik |
| -0.488646752 | 8.18E-15 | 6.13E-19  | 1 | Lgals1        |
| -0.625802067 | 8.57E-15 | 6.42E-19  | 1 | Cox6a1        |
| -0.766925679 | 8.63E-15 | 6.47E-19  | 1 | Cox7b         |
| -0.476086309 | 9.35E-15 | 7.00E-19  | 1 | Appt          |

|              |          |          |   |               |
|--------------|----------|----------|---|---------------|
| -0.671827966 | 9.59E-15 | 7.18E-19 | 1 | Bhlhe40       |
| -0.710746708 | 1.38E-14 | 1.04E-18 | 1 | Ndufa1        |
| -0.729623367 | 4.49E-14 | 3.36E-18 | 1 | Osbpl8        |
| -0.965342486 | 5.46E-14 | 4.09E-18 | 1 | Clec4d        |
| -0.83306057  | 1.43E-13 | 1.07E-17 | 1 | Ndufb6        |
| -1.038515257 | 2.31E-13 | 1.73E-17 | 1 | Csf2rb2       |
| 0.455670566  | 4.54E-13 | 3.40E-17 | 1 | Serinc3       |
| -0.729852636 | 6.49E-13 | 4.86E-17 | 1 | Nme1          |
| -0.693949431 | 7.24E-13 | 5.42E-17 | 1 | Esd           |
| -0.488463705 | 8.54E-13 | 6.40E-17 | 1 | Anxa2         |
| 0.588050728  | 8.99E-13 | 6.73E-17 | 1 | Zfp36         |
| 1.009179971  | 1.03E-12 | 7.69E-17 | 1 | Egr1          |
| -0.690356783 | 1.10E-12 | 8.26E-17 | 1 | Anxa4         |
| -0.516374064 | 1.12E-12 | 8.40E-17 | 1 | Hint1         |
| -0.544514433 | 1.63E-12 | 1.22E-16 | 1 | Mpc2          |
| -0.798091855 | 2.27E-12 | 1.70E-16 | 1 | Gpr137b       |
| -0.62009282  | 2.85E-12 | 2.13E-16 | 1 | S100a4        |
| -0.4874448   | 5.44E-12 | 4.07E-16 | 1 | Ndufs6        |
| -0.674438447 | 6.95E-12 | 5.20E-16 | 1 | Dnajc15       |
| -0.605676306 | 8.25E-12 | 6.18E-16 | 1 | S100a6        |
| 0.531293309  | 1.33E-11 | 9.97E-16 | 1 | Klf6          |
| -0.76910471  | 1.37E-11 | 1.02E-15 | 1 | Tspan4        |
| -0.783559938 | 2.23E-11 | 1.67E-15 | 1 | Gstm1         |
| -0.706166695 | 4.49E-11 | 3.37E-15 | 1 | Sec11c        |
| -0.650188069 | 4.50E-11 | 3.37E-15 | 1 | Ecm1          |
| -0.586294906 | 5.03E-11 | 3.77E-15 | 1 | Atp6v1c1      |
| -1.71484523  | 7.83E-11 | 5.87E-15 | 1 | Ctsk          |
| -0.506836728 | 8.62E-11 | 6.46E-15 | 1 | Tnfaip2       |
| -0.979630292 | 9.10E-11 | 6.81E-15 | 1 | Galnt6        |
| -0.709129817 | 9.15E-11 | 6.85E-15 | 1 | Aurkaip1      |
| -0.919500688 | 1.01E-10 | 7.60E-15 | 1 | Yif1b         |
| 0.432617144  | 1.35E-10 | 1.01E-14 | 1 | Junb          |
| -0.527073017 | 1.45E-10 | 1.09E-14 | 1 | Txndc17       |
| -0.780856357 | 1.75E-10 | 1.31E-14 | 1 | Tgm2          |
| -0.417292226 | 1.83E-10 | 1.37E-14 | 1 | Lgals3        |
| -0.663420643 | 2.67E-10 | 2.00E-14 | 1 | Anxa1         |
| -1.014752674 | 3.12E-10 | 2.34E-14 | 1 | Scd2          |
| -0.522683223 | 3.15E-10 | 2.36E-14 | 1 | Cox7a2        |
| -1.020155559 | 3.42E-10 | 2.56E-14 | 1 | Grpel1        |
| -0.700436815 | 3.56E-10 | 2.66E-14 | 1 | Fam129b       |
| -0.497528732 | 3.58E-10 | 2.68E-14 | 1 | Creg1         |
| -0.759675614 | 5.50E-10 | 4.12E-14 | 1 | Lpl           |
| -0.552429521 | 5.69E-10 | 4.26E-14 | 1 | Atp5j         |
| -0.651865776 | 5.96E-10 | 4.46E-14 | 1 | 1810058I24Rik |
| -1.15079086  | 6.12E-10 | 4.58E-14 | 1 | Acot13        |
| -0.53128111  | 6.47E-10 | 4.85E-14 | 1 | Dusp3         |
| -0.530609744 | 7.00E-10 | 5.24E-14 | 1 | Abcg1         |
| -0.898460807 | 8.78E-10 | 6.58E-14 | 1 | Slc48a1       |
| -0.934861668 | 1.03E-09 | 7.72E-14 | 1 | Timm17a       |
| -0.527975761 | 1.19E-09 | 8.93E-14 | 1 | Capg          |
| -0.579594834 | 1.20E-09 | 8.96E-14 | 1 | Mrpl54        |
| -1.21285893  | 1.69E-09 | 1.27E-13 | 1 | Slc6a8        |
| -0.522287216 | 1.74E-09 | 1.30E-13 | 1 | Cox5a         |
| 0.762265069  | 1.84E-09 | 1.38E-13 | 1 | H2-DMa        |
| -0.522317684 | 2.03E-09 | 1.52E-13 | 1 | Tmem256       |
| -0.462156304 | 2.50E-09 | 1.87E-13 | 1 | Aldoa         |
| -0.775769971 | 4.47E-09 | 3.35E-13 | 1 | Prdx6         |
| -0.531691748 | 4.59E-09 | 3.43E-13 | 1 | Timm13        |
| -0.715348223 | 5.48E-09 | 4.11E-13 | 1 | Lhfpl2        |
| -0.562976591 | 7.67E-09 | 5.75E-13 | 1 | Lipa          |
| -0.679896758 | 8.54E-09 | 6.40E-13 | 1 | Polr2e        |

|              |          |          |   |            |
|--------------|----------|----------|---|------------|
| -0.493032391 | 9.11E-09 | 6.82E-13 | 1 | Gm12338    |
| -0.355442887 | 9.52E-09 | 7.13E-13 | 1 | Mrps24     |
| -0.438129886 | 1.24E-08 | 9.30E-13 | 1 | Ndufa3     |
| -0.309544564 | 1.38E-08 | 1.04E-12 | 1 | Nedd8      |
| -0.570730724 | 1.67E-08 | 1.25E-12 | 1 | Nrp2       |
| -0.405902703 | 2.20E-08 | 1.65E-12 | 1 | Capns1     |
| -0.423638162 | 2.22E-08 | 1.66E-12 | 1 | Uqcr11     |
| -0.513228224 | 2.39E-08 | 1.79E-12 | 1 | Tmem258    |
| -0.569513962 | 2.63E-08 | 1.97E-12 | 1 | Dtnbp1     |
| -0.644498129 | 2.90E-08 | 2.17E-12 | 1 | Ndufa9     |
| -0.463918002 | 2.98E-08 | 2.23E-12 | 1 | Ssr4       |
| -0.579484794 | 3.11E-08 | 2.33E-12 | 1 | Nagk       |
| -0.490574439 | 3.17E-08 | 2.37E-12 | 1 | S100a10    |
| -0.566704476 | 3.62E-08 | 2.71E-12 | 1 | Elp5       |
| -0.570241527 | 3.76E-08 | 2.82E-12 | 1 | Gdf15      |
| -0.625993288 | 3.89E-08 | 2.91E-12 | 1 | Dap        |
| -1.346720204 | 4.76E-08 | 3.57E-12 | 1 | Fabp5      |
| -0.399170565 | 4.90E-08 | 3.67E-12 | 1 | Ldha       |
| -0.663983311 | 5.00E-08 | 3.74E-12 | 1 | Cytip      |
| -0.497710617 | 5.43E-08 | 4.07E-12 | 1 | Atp6v0d1   |
| -0.398121401 | 5.45E-08 | 4.08E-12 | 1 | Bola2      |
| -0.495187082 | 5.72E-08 | 4.28E-12 | 1 | Atp6v1d    |
| -0.40348996  | 6.35E-08 | 4.76E-12 | 1 | Uqcr10     |
| -0.493484201 | 6.62E-08 | 4.96E-12 | 1 | Ap2s1      |
| -0.878436488 | 6.74E-08 | 5.05E-12 | 1 | Mob4       |
| -0.361720369 | 7.85E-08 | 5.88E-12 | 1 | Surf4      |
| -0.408691116 | 8.05E-08 | 6.03E-12 | 1 | Gpr137b-ps |
| -0.611005247 | 8.06E-08 | 6.04E-12 | 1 | Pgls       |
| 0.441610343  | 8.80E-08 | 6.59E-12 | 1 | Mrc1       |
| -0.507420075 | 9.16E-08 | 6.86E-12 | 1 | Trem2      |
| -0.373273956 | 9.41E-08 | 7.05E-12 | 1 | Ywhag      |
| -0.993400051 | 9.54E-08 | 7.14E-12 | 1 | Fbxo32     |
| 0.466354727  | 1.02E-07 | 7.66E-12 | 1 | Fos        |
| -0.381556998 | 1.08E-07 | 8.06E-12 | 1 | Ctbp1      |
| -0.652620351 | 1.08E-07 | 8.07E-12 | 1 | Ech1       |
| -0.513247153 | 1.09E-07 | 8.20E-12 | 1 | Hsbp1      |
| -0.394106133 | 1.20E-07 | 8.98E-12 | 1 | Rnasek     |
| -0.5607455   | 1.22E-07 | 9.14E-12 | 1 | Mrpl20     |
| -0.518523236 | 1.32E-07 | 9.90E-12 | 1 | Ndufb7     |
| -0.669087633 | 1.39E-07 | 1.04E-11 | 1 | Rnf128     |
| -1.331130328 | 1.39E-07 | 1.04E-11 | 1 | Igf2r      |
| -0.728026814 | 1.55E-07 | 1.16E-11 | 1 | Fundc2     |
| -0.522924104 | 1.62E-07 | 1.21E-11 | 1 | Cox17      |
| -1.172504333 | 1.64E-07 | 1.23E-11 | 1 | Pdpn       |
| 0.442828988  | 1.91E-07 | 1.43E-11 | 1 | Dusp1      |
| -0.513729911 | 2.03E-07 | 1.52E-11 | 1 | Gusb       |
| -1.418859854 | 2.09E-07 | 1.56E-11 | 1 | Atp6v0d2   |
| -0.397148643 | 2.32E-07 | 1.74E-11 | 1 | Pkm        |
| -0.475028013 | 2.37E-07 | 1.77E-11 | 1 | Polr2f     |
| -0.461288435 | 2.45E-07 | 1.83E-11 | 1 | Itgax      |
| -0.481778564 | 2.75E-07 | 2.06E-11 | 1 | Ddx46      |
| -0.253049079 | 2.81E-07 | 2.11E-11 | 1 | Spcs1      |
| -0.517210931 | 2.97E-07 | 2.22E-11 | 1 | Cox5b      |
| -0.606579743 | 3.00E-07 | 2.25E-11 | 1 | Sars       |
| -0.463915041 | 3.09E-07 | 2.31E-11 | 1 | Tmem208    |
| 1.195396292  | 3.36E-07 | 2.52E-11 | 1 | Ccr2       |
| 1.072210889  | 3.46E-07 | 2.59E-11 | 1 | Hspa1b     |
| -0.623367257 | 3.53E-07 | 2.64E-11 | 1 | Ndufb9     |
| -0.565190257 | 3.61E-07 | 2.71E-11 | 1 | Ssu72      |
| -0.515802081 | 3.62E-07 | 2.71E-11 | 1 | Plec       |
| 0.366242345  | 3.83E-07 | 2.87E-11 | 1 | Cybb       |

|              |          |          |   |           |
|--------------|----------|----------|---|-----------|
| -0.487318773 | 3.84E-07 | 2.87E-11 | 1 | Krtcap2   |
| -0.620327395 | 3.96E-07 | 2.97E-11 | 1 | Csf2rb    |
| -1.244696292 | 4.07E-07 | 3.05E-11 | 1 | Rgcc      |
| -0.557787555 | 4.09E-07 | 3.06E-11 | 1 | Mmadhc    |
| 0.559851387  | 4.09E-07 | 3.07E-11 | 1 | Atf3      |
| -0.747380424 | 4.31E-07 | 3.23E-11 | 1 | Malt1     |
| -0.384411423 | 4.46E-07 | 3.34E-11 | 1 | Fam20c    |
| -0.768533208 | 4.63E-07 | 3.46E-11 | 1 | Lonrf3    |
| -0.77661566  | 4.84E-07 | 3.62E-11 | 1 | Msrbb1    |
| -0.639896368 | 5.48E-07 | 4.11E-11 | 1 | Iqsec1    |
| 0.508604069  | 5.51E-07 | 4.13E-11 | 1 | Unc93b1   |
| -0.32395746  | 6.27E-07 | 4.70E-11 | 1 | Fkbp2     |
| -0.739459416 | 6.37E-07 | 4.77E-11 | 1 | Mrpl43    |
| -0.454456755 | 6.38E-07 | 4.78E-11 | 1 | Cope      |
| -0.56706595  | 6.67E-07 | 4.99E-11 | 1 | Slc37a2   |
| -0.28809256  | 6.77E-07 | 5.07E-11 | 1 | Degs1     |
| -0.518079741 | 7.92E-07 | 5.93E-11 | 1 | Serpib6a  |
| -0.654482002 | 8.30E-07 | 6.22E-11 | 1 | Mrps7     |
| -0.566955079 | 8.47E-07 | 6.34E-11 | 1 | Vps25     |
| -0.440434178 | 8.65E-07 | 6.48E-11 | 1 | Taldo1    |
| -0.462341393 | 1.04E-06 | 7.79E-11 | 1 | Smpd13a   |
| 1.127948332  | 1.18E-06 | 8.85E-11 | 1 | Lilra5    |
| 0.565535193  | 1.19E-06 | 8.92E-11 | 1 | Cxcl2     |
| -1.738228057 | 1.20E-06 | 8.97E-11 | 1 | Npy       |
| -0.462319685 | 1.24E-06 | 9.28E-11 | 1 | Ctsl      |
| -0.386064207 | 1.25E-06 | 9.35E-11 | 1 | Atp5g3    |
| -0.475586463 | 1.36E-06 | 1.02E-10 | 1 | Vps29     |
| -0.421629409 | 1.65E-06 | 1.24E-10 | 1 | Psma1     |
| -0.427808144 | 1.66E-06 | 1.24E-10 | 1 | Tmem160   |
| -0.408922299 | 1.83E-06 | 1.37E-10 | 1 | Trappc2l  |
| -0.746709991 | 1.83E-06 | 1.37E-10 | 1 | Acot7     |
| 0.778659812  | 1.85E-06 | 1.38E-10 | 1 | Hspa1a    |
| -0.450937542 | 1.97E-06 | 1.48E-10 | 1 | Ninj1     |
| -0.278039449 | 2.08E-06 | 1.56E-10 | 1 | Park7     |
| -0.512763568 | 2.21E-06 | 1.66E-10 | 1 | Lasp1     |
| -0.686096199 | 2.23E-06 | 1.67E-10 | 1 | Trappc1   |
| -0.325577741 | 2.23E-06 | 1.67E-10 | 1 | Mrpl12    |
| -0.377883923 | 2.38E-06 | 1.78E-10 | 1 | Psmb4     |
| -0.294757628 | 2.51E-06 | 1.88E-10 | 1 | Mdh2      |
| -0.773536906 | 2.59E-06 | 1.94E-10 | 1 | Actn1     |
| -0.381404165 | 2.66E-06 | 1.99E-10 | 1 | Cd63      |
| -0.519004823 | 2.93E-06 | 2.20E-10 | 1 | Naa38     |
| -0.511665884 | 2.93E-06 | 2.20E-10 | 1 | Psmc4     |
| -0.309550784 | 3.02E-06 | 2.26E-10 | 1 | Psmc5     |
| -0.301348553 | 3.04E-06 | 2.27E-10 | 1 | Emilin2   |
| -0.537802257 | 3.08E-06 | 2.30E-10 | 1 | S100a1    |
| -0.3741362   | 3.15E-06 | 2.36E-10 | 1 | Ndufb8    |
| -0.353568444 | 3.19E-06 | 2.39E-10 | 1 | Chchd1    |
| 0.481920936  | 3.25E-06 | 2.43E-10 | 1 | Hexb      |
| -0.400426598 | 3.44E-06 | 2.58E-10 | 1 | Cyb5r3    |
| -0.582027545 | 3.56E-06 | 2.66E-10 | 1 | Tmem167   |
| -0.468012466 | 3.74E-06 | 2.80E-10 | 1 | Cib1      |
| -0.414909499 | 3.85E-06 | 2.89E-10 | 1 | Txn1      |
| -0.629470347 | 4.06E-06 | 3.04E-10 | 1 | Gabarapl1 |
| -0.355838295 | 4.27E-06 | 3.20E-10 | 1 | Mrps18c   |
| -0.38917107  | 4.32E-06 | 3.24E-10 | 1 | Slc9a3r1  |
| -0.307293142 | 4.32E-06 | 3.24E-10 | 1 | Vat1      |
| -0.523528347 | 4.38E-06 | 3.28E-10 | 1 | Ndufs8    |
| -0.323354572 | 4.71E-06 | 3.53E-10 | 1 | Uqcrc2    |
| -0.440986537 | 5.06E-06 | 3.79E-10 | 1 | Soat1     |
| -0.450787764 | 5.20E-06 | 3.89E-10 | 1 | Ugp2      |



|              |          |          |   |               |
|--------------|----------|----------|---|---------------|
| -0.528345258 | 5.32E-06 | 3.98E-10 | 1 | Gsto1         |
| -0.388476441 | 5.32E-06 | 3.99E-10 | 1 | Ndufb2        |
| -0.27773752  | 5.46E-06 | 4.09E-10 | 1 | Minos1        |
| -0.620795187 | 5.47E-06 | 4.10E-10 | 1 | Ndufs4        |
| -0.423478973 | 5.80E-06 | 4.34E-10 | 1 | Lpp           |
| -1.156558501 | 5.86E-06 | 4.39E-10 | 1 | P2ry10        |
| -0.424062072 | 6.23E-06 | 4.66E-10 | 1 | Lrpap1        |
| -0.907615534 | 6.27E-06 | 4.70E-10 | 1 | Hilpda        |
| 0.269538313  | 6.60E-06 | 4.94E-10 | 1 | Hspa8         |
| -0.371972645 | 6.77E-06 | 5.07E-10 | 1 | Ptplad2       |
| -0.321526975 | 7.25E-06 | 5.43E-10 | 1 | Mtss1         |
| -0.496033102 | 8.55E-06 | 6.40E-10 | 1 | Actr1a        |
| -0.385126024 | 8.69E-06 | 6.51E-10 | 1 | Myof          |
| -0.292249053 | 8.74E-06 | 6.55E-10 | 1 | Prdx2         |
| -0.565257216 | 8.87E-06 | 6.64E-10 | 1 | Cuta          |
| -0.503663512 | 9.08E-06 | 6.80E-10 | 1 | Yif1a         |
| -0.349832698 | 9.25E-06 | 6.93E-10 | 1 | Gtf2h5        |
| -0.383559864 | 9.28E-06 | 6.95E-10 | 1 | Hspa9         |
| -0.389228685 | 9.35E-06 | 7.00E-10 | 1 | Ckap4         |
| -0.349003531 | 9.71E-06 | 7.27E-10 | 1 | Cct2          |
| -0.331322537 | 9.73E-06 | 7.29E-10 | 1 | Akr1a1        |
| 0.91249635   | 1.05E-05 | 7.87E-10 | 1 | Tmem176a      |
| -0.45167528  | 1.08E-05 | 8.06E-10 | 1 | Vimp          |
| -0.368585362 | 1.08E-05 | 8.07E-10 | 1 | Atp6v0e       |
| -0.900127296 | 1.13E-05 | 8.47E-10 | 1 | Fam134a       |
| -0.458356304 | 1.15E-05 | 8.62E-10 | 1 | Pcyt1a        |
| -0.604100201 | 1.16E-05 | 8.66E-10 | 1 | Aip           |
| -0.544062908 | 1.27E-05 | 9.51E-10 | 1 | Cct6a         |
| -0.29194692  | 1.29E-05 | 9.63E-10 | 1 | Coa3          |
| -0.717959468 | 1.30E-05 | 9.72E-10 | 1 | Mrpl36        |
| -0.400045622 | 1.31E-05 | 9.84E-10 | 1 | Aldh2         |
| -0.349707171 | 1.33E-05 | 9.94E-10 | 1 | Tax1bp1       |
| -0.287061352 | 1.41E-05 | 1.05E-09 | 1 | 2010107E04Rik |
| -0.483727469 | 1.46E-05 | 1.10E-09 | 1 | Galns         |
| -0.499711664 | 1.48E-05 | 1.11E-09 | 1 | Fnip2         |
| -0.382445356 | 1.66E-05 | 1.24E-09 | 1 | Eif3i         |
| 0.485795433  | 1.70E-05 | 1.28E-09 | 1 | Cd81          |
| -0.381588863 | 1.79E-05 | 1.34E-09 | 1 | Atp6v1e1      |
| -0.461288487 | 1.84E-05 | 1.38E-09 | 1 | Zfand2a       |
| -0.604445034 | 1.90E-05 | 1.42E-09 | 1 | Prpsap1       |
| 0.283610174  | 1.96E-05 | 1.47E-09 | 1 | Sepp1         |
| -0.700193335 | 2.20E-05 | 1.65E-09 | 1 | Ccdc107       |
| 0.64081162   | 2.23E-05 | 1.67E-09 | 1 | Rhob          |
| -0.343875756 | 2.24E-05 | 1.68E-09 | 1 | Mrpl42        |
| -0.435820722 | 2.29E-05 | 1.71E-09 | 1 | Nceh1         |
| -0.530904724 | 2.29E-05 | 1.71E-09 | 1 | Abhd5         |
| -0.830621474 | 2.33E-05 | 1.74E-09 | 1 | Tmem65        |
| -1.201831992 | 2.51E-05 | 1.88E-09 | 1 | Mgst1         |
| -0.357200418 | 2.60E-05 | 1.95E-09 | 1 | Sgpl1         |
| -0.323656086 | 2.65E-05 | 1.98E-09 | 1 | Prdx1         |
| -0.344388558 | 2.68E-05 | 2.00E-09 | 1 | Npepps        |
| 0.301170073  | 2.69E-05 | 2.01E-09 | 1 | H2-K1         |
| -0.353722363 | 2.86E-05 | 2.14E-09 | 1 | Ghitm         |
| 0.549243807  | 2.87E-05 | 2.15E-09 | 1 | Nfkbiz        |
| -0.434145748 | 2.87E-05 | 2.15E-09 | 1 | Atg3          |
| -0.489950334 | 2.93E-05 | 2.19E-09 | 1 | Flii          |
| 0.262647648  | 3.05E-05 | 2.29E-09 | 1 | C1qc          |
| -0.520914975 | 3.13E-05 | 2.34E-09 | 1 | Lsm4          |
| -0.705158464 | 3.15E-05 | 2.36E-09 | 1 | Stam2         |
| 0.361789152  | 3.18E-05 | 2.38E-09 | 1 | Csf1r         |
| 0.461350976  | 3.33E-05 | 2.49E-09 | 1 | Skil          |

|              |             |          |   |          |
|--------------|-------------|----------|---|----------|
| -0.514113898 | 3.44E-05    | 2.58E-09 | 1 | Pgk1     |
| -0.398492005 | 3.54E-05    | 2.65E-09 | 1 | Atp5d    |
| -0.434931086 | 3.56E-05    | 2.67E-09 | 1 | Dph3     |
| -0.280017475 | 3.84E-05    | 2.88E-09 | 1 | Bag1     |
| -0.395073839 | 4.20E-05    | 3.15E-09 | 1 | Snx1     |
| -0.333214914 | 4.49E-05    | 3.36E-09 | 1 | Myeov2   |
| -0.358423914 | 4.64E-05    | 3.47E-09 | 1 | Fam195b  |
| -0.376663952 | 4.74E-05    | 3.55E-09 | 1 | Plaur    |
| -0.309633204 | 4.74E-05    | 3.55E-09 | 1 | Ifi30    |
| -0.665198115 | 4.84E-05    | 3.63E-09 | 1 | Pgd      |
| -0.324506745 | 4.87E-05    | 3.65E-09 | 1 | Ndufb11  |
| -0.59306432  | 4.89E-05    | 3.66E-09 | 1 | Lsm3     |
| -0.376854798 | 4.94E-05    | 3.70E-09 | 1 | Igf1     |
| -0.401352127 | 5.11E-05    | 3.82E-09 | 1 | Fkbp1a   |
| -0.410765917 | 5.18E-05    | 3.88E-09 | 1 | Ctnnb1   |
| -0.644851977 | 5.22E-05    | 3.91E-09 | 1 | Ndrgr1   |
| -0.437485449 | 5.58E-05    | 4.18E-09 | 1 | Tmem147  |
| -0.568838747 | 5.59E-05    | 4.19E-09 | 1 | Uba1     |
| -0.423605146 | 5.62E-05    | 4.21E-09 | 1 | Rftn1    |
| -0.434243176 | 5.65E-05    | 4.23E-09 | 1 | Al413582 |
| 0.468204292  | 5.75E-05    | 4.31E-09 | 1 | Jun      |
| -0.405466001 | 5.84E-05    | 4.38E-09 | 1 | Cd93     |
| -0.855283591 | 5.87E-05    | 4.40E-09 | 1 | Gcsh     |
| -0.80903494  | 5.89E-05    | 4.41E-09 | 1 | Unc50    |
| -0.316107823 | 6.10E-05    | 4.57E-09 | 1 | Ankrd13a |
| -0.299899707 | 6.29E-05    | 4.71E-09 | 1 | Cops6    |
| -0.349160632 | 6.47E-05    | 4.85E-09 | 1 | Ndufa11  |
| -0.340591097 | 6.63E-05    | 4.97E-09 | 1 | Rps27l   |
| -0.304862312 | 6.68E-05    | 5.00E-09 | 1 | Atp5f1   |
| -0.585700273 | 6.74E-05    | 5.05E-09 | 1 | Hsd17b10 |
| -0.53005339  | 6.75E-05    | 5.05E-09 | 1 | Ralgds   |
| -0.394987493 | 6.89E-05    | 5.16E-09 | 1 | Bcap31   |
| -0.291039471 | 7.41E-05    | 5.55E-09 | 1 | Uqcrq    |
| -0.559417333 | 7.45E-05    | 5.58E-09 | 1 | BC004004 |
| -0.825449905 | 7.53E-05    | 5.64E-09 | 1 | Htatip2  |
| 0.256466972  | 7.88E-05    | 5.90E-09 | 1 | C1qa     |
| -0.417881621 | 7.90E-05    | 5.92E-09 | 1 | Por      |
| -0.640745859 | 8.17E-05    | 6.12E-09 | 1 | Mtf2     |
| -0.345090329 | 8.56E-05    | 6.41E-09 | 1 | Ndufv2   |
| -0.503466807 | 8.65E-05    | 6.48E-09 | 1 | Snrpe    |
| -0.306104631 | 9.81E-05    | 7.35E-09 | 1 | BC031181 |
| -0.5022359   | 9.85E-05    | 7.38E-09 | 1 | Wsb2     |
| -0.38812104  | 9.93E-05    | 7.44E-09 | 1 | Mien1    |
| -0.426173031 | 0.000100325 | 7.51E-09 | 1 | Tuba4a   |
| -0.378059536 | 0.000100568 | 7.53E-09 | 1 | Sod2     |
| -0.523003249 | 0.000100766 | 7.55E-09 | 1 | S100a11  |
| -0.666766116 | 0.000103462 | 7.75E-09 | 1 | Gyg      |
| -0.511441583 | 0.000105728 | 7.92E-09 | 1 | Hbp1     |
| -0.408617377 | 0.000105753 | 7.92E-09 | 1 | Tecr     |
| -0.36753239  | 0.000107549 | 8.05E-09 | 1 | Plin2    |
| -0.495401153 | 0.000107912 | 8.08E-09 | 1 | Crem     |
| -0.478918931 | 0.000110454 | 8.27E-09 | 1 | Pdcd6    |
| -0.568414919 | 0.000119192 | 8.93E-09 | 1 | Sdf2     |
| -0.290129494 | 0.000121256 | 9.08E-09 | 1 | Arl8b    |
| -0.697782707 | 0.000122509 | 9.18E-09 | 1 | Thoc7    |
| -0.27532548  | 0.00012545  | 9.40E-09 | 1 | Tpm1     |
| -0.304217752 | 0.000127355 | 9.54E-09 | 1 | Vcp      |
| -0.664003439 | 0.00013024  | 9.75E-09 | 1 | Commdd3  |
| -0.906497401 | 0.000134208 | 1.01E-08 | 1 | Med8     |
| -0.375818948 | 0.000142667 | 1.07E-08 | 1 | Psmd1    |
| -0.444223828 | 0.000144559 | 1.08E-08 | 1 | Elovl1   |

|              |             |          |   |            |
|--------------|-------------|----------|---|------------|
| -0.965304555 | 0.000147247 | 1.10E-08 | 1 | Alg3       |
| -0.387035696 | 0.000147977 | 1.11E-08 | 1 | Ssr2       |
| -0.27395227  | 0.000159521 | 1.19E-08 | 1 | Ssb        |
| -0.67070423  | 0.000161263 | 1.21E-08 | 1 | D17Wsu104e |
| -0.389197705 | 0.000171737 | 1.29E-08 | 1 | Rexo2      |
| -0.401603389 | 0.000174266 | 1.31E-08 | 1 | Bud31      |
| -0.464215187 | 0.00017749  | 1.33E-08 | 1 | Vdac3      |
| -0.659511589 | 0.000184129 | 1.38E-08 | 1 | Il1rn      |
| -0.424033162 | 0.000185716 | 1.39E-08 | 1 | Pik3r5     |
| -0.259778788 | 0.000190068 | 1.42E-08 | 1 | Gabarap    |
| -0.626790863 | 0.000192122 | 1.44E-08 | 1 | Dda1       |
| -0.271238199 | 0.000193412 | 1.45E-08 | 1 | Atp6v0b    |
| 0.591077609  | 0.000193839 | 1.45E-08 | 1 | Ppp1r15a   |
| -0.404455755 | 0.000195903 | 1.47E-08 | 1 | Ndufa5     |
| -0.353241732 | 0.000201139 | 1.51E-08 | 1 | Cript      |
| -0.414411867 | 0.000211798 | 1.59E-08 | 1 | MIlf2      |
| 0.413411903  | 0.000214723 | 1.61E-08 | 1 | Ctsc       |
| -0.431868458 | 0.000217908 | 1.63E-08 | 1 | Tmed3      |
| -0.384485547 | 0.000218568 | 1.64E-08 | 1 | Lgals3bp   |
| -1.334701029 | 0.000226913 | 1.70E-08 | 1 | F7         |
| -0.593751009 | 0.000230264 | 1.72E-08 | 1 | Gfpt1      |
| -0.314380046 | 0.000236934 | 1.77E-08 | 1 | Cyb5       |
| -0.272500451 | 0.000239795 | 1.80E-08 | 1 | Dad1       |
| -0.271369009 | 0.000247796 | 1.86E-08 | 1 | Eif2s2     |
| -0.493983508 | 0.000261331 | 1.96E-08 | 1 | Uchl5      |
| 0.503563885  | 0.00026544  | 1.99E-08 | 1 | Irf2bp2    |
| -0.529321814 | 0.00027191  | 2.04E-08 | 1 | Nhp2       |
| -0.403273139 | 0.000273933 | 2.05E-08 | 1 | Cd36       |
| -0.566294488 | 0.000275809 | 2.07E-08 | 1 | St6galnac4 |
| -0.544332973 | 0.00028763  | 2.15E-08 | 1 | Sar1b      |
| -1.558696064 | 0.000288294 | 2.16E-08 | 1 | F10        |
| -0.497121277 | 0.00029007  | 2.17E-08 | 1 | Atg12      |
| -0.467558327 | 0.000298554 | 2.24E-08 | 1 | Sptlc2     |
| -0.257503887 | 0.000301943 | 2.26E-08 | 1 | Psmc2      |
| -0.37000158  | 0.0003146   | 2.36E-08 | 1 | Snx12      |
| -0.621723713 | 0.000315263 | 2.36E-08 | 1 | Ift20      |
| 0.701921093  | 0.000321692 | 2.41E-08 | 1 | Axl        |
| -0.562124284 | 0.000322703 | 2.42E-08 | 1 | Kctd10     |
| -0.337525087 | 0.00033587  | 2.52E-08 | 1 | Etf1       |
| -0.416387554 | 0.000341198 | 2.56E-08 | 1 | Tmem9b     |
| 0.644702311  | 0.000354694 | 2.66E-08 | 1 | Ccrl2      |
| -0.524658102 | 0.00036436  | 2.73E-08 | 1 | Clcn7      |
| -0.580202403 | 0.000373431 | 2.80E-08 | 1 | Pak1ip1    |
| -0.806490979 | 0.000377067 | 2.82E-08 | 1 | Ercc6      |
| -0.386792782 | 0.000379798 | 2.84E-08 | 1 | Chmp4b     |
| -0.267442906 | 0.000391477 | 2.93E-08 | 1 | Tm2d2      |
| -0.392974487 | 0.000391779 | 2.93E-08 | 1 | Comm4      |
| -0.264781331 | 0.000404808 | 3.03E-08 | 1 | Copz1      |
| 0.525284175  | 0.000404897 | 3.03E-08 | 1 | Mafb       |
| -0.385227754 | 0.000406098 | 3.04E-08 | 1 | Tes        |
| -0.82773079  | 0.000410222 | 3.07E-08 | 1 | Aldh3b1    |
| -0.329788584 | 0.000421357 | 3.16E-08 | 1 | Vps28      |
| -0.379050819 | 0.000422189 | 3.16E-08 | 1 | Rnf7       |
| -0.276460143 | 0.000429209 | 3.21E-08 | 1 | Mrps21     |
| -0.452941489 | 0.000450732 | 3.38E-08 | 1 | Dyrk1a     |
| -0.291828493 | 0.000456133 | 3.42E-08 | 1 | Fbxo33     |
| -0.314153849 | 0.000462586 | 3.46E-08 | 1 | Oxct1      |
| -0.513526631 | 0.000471299 | 3.53E-08 | 1 | Echs1      |
| -0.569405031 | 0.000479595 | 3.59E-08 | 1 | Mrpl41     |
| -0.795030132 | 0.000483473 | 3.62E-08 | 1 | Anpep      |
| -0.451911478 | 0.000489299 | 3.66E-08 | 1 | Uap1l1     |

|              |             |          |   |           |
|--------------|-------------|----------|---|-----------|
| -0.282667741 | 0.000509499 | 3.82E-08 | 1 | Smdt1     |
| -0.29191405  | 0.000509907 | 3.82E-08 | 1 | Atp6v1a   |
| 0.986007039  | 0.000518405 | 3.88E-08 | 1 | Serpinf1  |
| -0.520010241 | 0.000523562 | 3.92E-08 | 1 | Tbrg1     |
| -0.289251983 | 0.000525314 | 3.93E-08 | 1 | Mrpl33    |
| -0.398424546 | 0.000526012 | 3.94E-08 | 1 | Stom      |
| -0.387832764 | 0.000535795 | 4.01E-08 | 1 | Tcp1      |
| -0.593473997 | 0.000537381 | 4.02E-08 | 1 | Nubp2     |
| -0.433808033 | 0.000537918 | 4.03E-08 | 1 | Kcnn4     |
| -0.307979438 | 0.000559083 | 4.19E-08 | 1 | Eif3k     |
| -0.355479382 | 0.000578527 | 4.33E-08 | 1 | Hvcn1     |
| -0.336194628 | 0.000605417 | 4.53E-08 | 1 | Ppp2ca    |
| -0.327662759 | 0.000609768 | 4.57E-08 | 1 | Blvra     |
| -0.733385644 | 0.00061791  | 4.63E-08 | 1 | Mrpl28    |
| -0.282679644 | 0.000623483 | 4.67E-08 | 1 | Ubxn1     |
| 0.519594665  | 0.000633776 | 4.75E-08 | 1 | Emr1      |
| 0.253313779  | 0.000645654 | 4.84E-08 | 1 | Jund      |
| -0.60240127  | 0.000646566 | 4.84E-08 | 1 | Rps6kb1   |
| -0.392328952 | 0.000651133 | 4.88E-08 | 1 | Ndufb10   |
| -0.665284977 | 0.000664313 | 4.98E-08 | 1 | Prpf38a   |
| -0.663028053 | 0.000675294 | 5.06E-08 | 1 | Inf2      |
| 0.582038532  | 0.000686608 | 5.14E-08 | 1 | C5ar1     |
| 0.951201655  | 0.000691832 | 5.18E-08 | 1 | Phlda1    |
| -0.30426969  | 0.000710618 | 5.32E-08 | 1 | Eprs      |
| -0.394568106 | 0.00072987  | 5.47E-08 | 1 | Cct3      |
| -0.996813163 | 0.000753035 | 5.64E-08 | 1 | Angptl2   |
| -0.322861297 | 0.000769081 | 5.76E-08 | 1 | Sdhd      |
| -0.582681419 | 0.000800194 | 5.99E-08 | 1 | Scoc      |
| -0.473882961 | 0.000813294 | 6.09E-08 | 1 | Uggt1     |
| -0.445816751 | 0.000834974 | 6.25E-08 | 1 | Dctn3     |
| -0.264701427 | 0.000841297 | 6.30E-08 | 1 | Pmp22     |
| -0.423385663 | 0.000845805 | 6.33E-08 | 1 | Gng5      |
| -0.55581791  | 0.000852758 | 6.39E-08 | 1 | St3gal1   |
| -0.668270463 | 0.000935442 | 7.01E-08 | 1 | Vps37b    |
| -0.495217044 | 0.000951714 | 7.13E-08 | 1 | Ankrd40   |
| -0.361396382 | 0.001005554 | 7.53E-08 | 1 | Leprotl1  |
| -0.343236784 | 0.001019573 | 7.64E-08 | 1 | Ube2a     |
| -0.514350002 | 0.00102114  | 7.65E-08 | 1 | Napsa     |
| -0.321445015 | 0.00103147  | 7.73E-08 | 1 | Srf       |
| -0.331952864 | 0.00103505  | 7.75E-08 | 1 | C1qbp     |
| -0.631685348 | 0.001058414 | 7.93E-08 | 1 | Ict1      |
| -0.376556958 | 0.001106833 | 8.29E-08 | 1 | Romo1     |
| 0.411456517  | 0.001217157 | 9.12E-08 | 1 | Al607873  |
| -0.862585934 | 0.001221178 | 9.15E-08 | 1 | Pts       |
| -0.422733426 | 0.00122723  | 9.19E-08 | 1 | Alg5      |
| -0.457975777 | 0.00125709  | 9.41E-08 | 1 | Gda       |
| -0.325179791 | 0.001271411 | 9.52E-08 | 1 | Prr13     |
| -0.511193063 | 0.001297587 | 9.72E-08 | 1 | Hist1h2bc |
| -0.683834585 | 0.001356911 | 1.02E-07 | 1 | Uso1      |
| -1.08165635  | 0.001361917 | 1.02E-07 | 1 | Gdpd1     |
| -0.309852183 | 0.001369128 | 1.03E-07 | 1 | Ndufs7    |
| -0.285960626 | 0.001460909 | 1.09E-07 | 1 | Fis1      |
| -0.285016885 | 0.001477446 | 1.11E-07 | 1 | Emc4      |
| -0.257992635 | 0.001545661 | 1.16E-07 | 1 | Txn2      |
| -0.301705233 | 0.001586788 | 1.19E-07 | 1 | Itgb2     |
| -0.656403222 | 0.001724858 | 1.29E-07 | 1 | Ptgr1     |
| -0.267906158 | 0.00174634  | 1.31E-07 | 1 | Cd68      |
| -0.559929393 | 0.001754544 | 1.31E-07 | 1 | Zmat5     |
| -0.702891354 | 0.001803462 | 1.35E-07 | 1 | Pqlc3     |
| -1.686108766 | 0.001821332 | 1.36E-07 | 1 | Ccr7      |
| -0.738561185 | 0.00186417  | 1.40E-07 | 1 | Stk16     |

|              |             |          |   |           |
|--------------|-------------|----------|---|-----------|
| -0.318553133 | 0.001873322 | 1.40E-07 | 1 | Dynlrb1   |
| -0.455710474 | 0.00195099  | 1.46E-07 | 1 | Slc31a2   |
| -0.296670791 | 0.001981305 | 1.48E-07 | 1 | Psma2     |
| 0.275278228  | 0.001987403 | 1.49E-07 | 1 | Nfkbia    |
| -0.401977004 | 0.002005412 | 1.50E-07 | 1 | Gba       |
| -0.589411806 | 0.002030649 | 1.52E-07 | 1 | Mphosph10 |
| -0.283229363 | 0.002054892 | 1.54E-07 | 1 | Vps35     |
| -0.402016541 | 0.00206135  | 1.54E-07 | 1 | Smu1      |
| -0.265466907 | 0.002099348 | 1.57E-07 | 1 | Cox8a     |
| -0.517244714 | 0.002188533 | 1.64E-07 | 1 | Cd151     |
| -0.569685031 | 0.002190397 | 1.64E-07 | 1 | Hcst      |
| -0.874966148 | 0.00227128  | 1.70E-07 | 1 | Slc7a11   |
| -0.45818551  | 0.002306537 | 1.73E-07 | 1 | Sdhc      |
| -0.745055899 | 0.002345381 | 1.76E-07 | 1 | Smim12    |
| -0.538560884 | 0.002430987 | 1.82E-07 | 1 | Srp68     |
| -0.394305556 | 0.002437085 | 1.83E-07 | 1 | Lypla1    |
| -0.422888689 | 0.002527082 | 1.89E-07 | 1 | Pdlim7    |
| -0.486771836 | 0.002538851 | 1.90E-07 | 1 | Pdgfa     |
| -0.400268417 | 0.002571444 | 1.93E-07 | 1 | Snx17     |
| -0.3133936   | 0.002585393 | 1.94E-07 | 1 | Cnih1     |
| -0.310356565 | 0.002585528 | 1.94E-07 | 1 | Npc1      |
| -0.294444208 | 0.00269192  | 2.02E-07 | 1 | Rrp1      |
| -0.527874668 | 0.002791531 | 2.09E-07 | 1 | Ammecr1l  |
| -0.343288162 | 0.002933203 | 2.20E-07 | 1 | Myo1e     |
| -0.475045255 | 0.003039829 | 2.28E-07 | 1 | Atp2b4    |
| -0.369056033 | 0.003150532 | 2.36E-07 | 1 | Reep3     |
| -0.331831539 | 0.00320952  | 2.40E-07 | 1 | Edf1      |
| -0.331327832 | 0.003283997 | 2.46E-07 | 1 | Ier3ip1   |
| -0.266782268 | 0.003467237 | 2.60E-07 | 1 | Atp6v1b2  |
| 0.415133728  | 0.003467618 | 2.60E-07 | 1 | Tgif1     |
| -0.374706051 | 0.003606799 | 2.70E-07 | 1 | Dctn6     |
| 1.049075323  | 0.003623768 | 2.71E-07 | 1 | Hlx       |
| -0.260980598 | 0.00368159  | 2.76E-07 | 1 | Mpp1      |
| -0.499460509 | 0.003823219 | 2.86E-07 | 1 | Ostm1     |
| -0.690458813 | 0.003836023 | 2.87E-07 | 1 | Clns1a    |
| -0.552787341 | 0.003901584 | 2.92E-07 | 1 | Arpc5l    |
| -0.285512034 | 0.003931615 | 2.94E-07 | 1 | Tor1aip2  |
| -0.470885906 | 0.004001523 | 3.00E-07 | 1 | Ufm1      |
| -0.582204497 | 0.004179011 | 3.13E-07 | 1 | Fgr       |
| -0.315446416 | 0.00421882  | 3.16E-07 | 1 | Limd1     |
| -0.314681049 | 0.004249261 | 3.18E-07 | 1 | Cuedc2    |
| 0.580639668  | 0.004260828 | 3.19E-07 | 1 | Tnf       |
| 0.691448076  | 0.004303015 | 3.22E-07 | 1 | H2-DMb1   |
| 0.653867729  | 0.004324169 | 3.24E-07 | 1 | Mgl2      |
| -0.287157591 | 0.004338679 | 3.25E-07 | 1 | Impdh1    |
| -0.257089874 | 0.004391062 | 3.29E-07 | 1 | Nme2      |
| 0.772097205  | 0.004407522 | 3.30E-07 | 1 | Btg2      |
| -0.674181918 | 0.004413644 | 3.31E-07 | 1 | Nek6      |
| 0.490346591  | 0.004436234 | 3.32E-07 | 1 | Zfp361l   |
| 1.063102497  | 0.004449241 | 3.33E-07 | 1 | Plxdc2    |
| -0.80032974  | 0.004462464 | 3.34E-07 | 1 | Rai14     |
| -0.453924595 | 0.004479508 | 3.35E-07 | 1 | Akip1     |
| -0.453721119 | 0.004539422 | 3.40E-07 | 1 | Nadk      |
| 0.511756077  | 0.004543683 | 3.40E-07 | 1 | Aif1      |
| -0.29056475  | 0.004676233 | 3.50E-07 | 1 | Eif1a     |
| -0.423825308 | 0.004677133 | 3.50E-07 | 1 | Pqlc1     |
| -0.489875534 | 0.004946378 | 3.70E-07 | 1 | Slc43a2   |
| -0.266892259 | 0.004993634 | 3.74E-07 | 1 | Emc7      |
| -0.561371174 | 0.005109512 | 3.83E-07 | 1 | Mrpl14    |
| -0.259112466 | 0.005182    | 3.88E-07 | 1 | Emp3      |
| -0.780600533 | 0.005201857 | 3.90E-07 | 1 | Gramd3    |

|              |             |          |   |               |
|--------------|-------------|----------|---|---------------|
| -0.363100085 | 0.005230792 | 3.92E-07 | 1 | Sec61a1       |
| -0.667132078 | 0.005349627 | 4.01E-07 | 1 | Gla           |
| -0.341776632 | 0.005361516 | 4.02E-07 | 1 | U2af1l4       |
| -0.279769992 | 0.005410708 | 4.05E-07 | 1 | Dpp7          |
| -0.341776784 | 0.005480047 | 4.10E-07 | 1 | Rps19bp1      |
| -0.310236743 | 0.005494889 | 4.12E-07 | 1 | Psm14         |
| -0.391318743 | 0.005580287 | 4.18E-07 | 1 | Tcn2          |
| -0.314138756 | 0.005944027 | 4.45E-07 | 1 | Nsf           |
| -1.239767025 | 0.005977343 | 4.48E-07 | 1 | Pcp4l1        |
| -0.304605164 | 0.005988417 | 4.49E-07 | 1 | Copa          |
| -0.386424315 | 0.006123233 | 4.59E-07 | 1 | Atraid        |
| -0.683847693 | 0.006285314 | 4.71E-07 | 1 | 1500011K16Rik |
| -0.407942484 | 0.006348966 | 4.76E-07 | 1 | Apoa1bp       |
| -0.310277291 | 0.006503389 | 4.87E-07 | 1 | Slc25a24      |
| 0.796719929  | 0.00667304  | 5.00E-07 | 1 | Lacc1         |
| -0.27616992  | 0.006801235 | 5.09E-07 | 1 | Psm4          |
| -0.323717884 | 0.007041094 | 5.27E-07 | 1 | 2310036O22Rik |
| -0.475829612 | 0.007055971 | 5.28E-07 | 1 | Prosc         |
| -0.307455075 | 0.00713139  | 5.34E-07 | 1 | Fam96a        |
| -0.323823671 | 0.007374026 | 5.52E-07 | 1 | Hipk1         |
| -0.368441652 | 0.007708627 | 5.77E-07 | 1 | Hras          |
| 0.518026856  | 0.007781208 | 5.83E-07 | 1 | Ier5          |
| -0.853096318 | 0.007855303 | 5.88E-07 | 1 | Yars          |
| -0.435236685 | 0.008075699 | 6.05E-07 | 1 | Cenpb         |
| -0.460080277 | 0.008101965 | 6.07E-07 | 1 | Bola3         |
| -0.608778224 | 0.008424215 | 6.31E-07 | 1 | Idh1          |
| -0.282009741 | 0.008440358 | 6.32E-07 | 1 | Eif1b         |
| -0.407537373 | 0.008465024 | 6.34E-07 | 1 | Trappc4       |
| -0.505861503 | 0.008470756 | 6.34E-07 | 1 | Tmem43        |
| -0.270486855 | 0.008625127 | 6.46E-07 | 1 | Tomm22        |
| -0.572141264 | 0.009054281 | 6.78E-07 | 1 | Tfrc          |
| -0.588188734 | 0.00909126  | 6.81E-07 | 1 | Fam63a        |
| -0.496610583 | 0.009293853 | 6.96E-07 | 1 | Iscu          |
| -0.612648249 | 0.009392771 | 7.03E-07 | 1 | Bcap29        |
| -0.645031375 | 0.009848476 | 7.38E-07 | 1 | Slc30a1       |
| -0.257116816 | 0.009955577 | 7.49E-07 | 1 | Scpep1        |
| -0.459187462 | 0.01001523  | 7.50E-07 | 1 | Hk3           |
| -0.629372692 | 0.010018334 | 7.50E-07 | 1 | Cyb561d2      |
| -0.745163752 | 0.010620922 | 7.95E-07 | 1 | Galc          |
| -0.426896306 | 0.010752478 | 8.05E-07 | 1 | Al462493      |
| -0.598403137 | 0.010774579 | 8.07E-07 | 1 | Mrpl55        |
| -0.472418032 | 0.010889202 | 8.16E-07 | 1 | Pitpnc1       |
| -0.305771499 | 0.011348789 | 8.50E-07 | 1 | Itgb1bp1      |
| 0.708970379  | 0.01162764  | 8.71E-07 | 1 | Il10ra        |
| -0.271164879 | 0.011754714 | 8.80E-07 | 1 | Psm7          |
| -0.366094475 | 0.012016267 | 9.00E-07 | 1 | Ppt2          |
| -0.396920245 | 0.012274932 | 9.19E-07 | 1 | Ten1          |
| -0.332218576 | 0.012402688 | 9.29E-07 | 1 | Sptlc1        |
| 1.004125091  | 0.012423436 | 9.30E-07 | 1 | Tagap         |
| -0.395007413 | 0.012762666 | 9.56E-07 | 1 | Slc38a1       |
| 0.722690892  | 0.012883697 | 9.65E-07 | 1 | Zfhx3         |
| -1.686952924 | 0.013063378 | 9.78E-07 | 1 | Nkg7          |
| 0.493259528  | 0.013136057 | 9.84E-07 | 1 | Slamf9        |
| -0.39846111  | 0.013235976 | 9.91E-07 | 1 | Cox19         |
| -0.271662232 | 0.013362016 | 1.00E-06 | 1 | Hn1           |
| -0.398739483 | 0.013869118 | 1.04E-06 | 1 | Phf5a         |
| 0.690796813  | 0.014019059 | 1.05E-06 | 1 | Cx3cr1        |
| -0.48789537  | 0.014204641 | 1.06E-06 | 1 | Mocs2         |
| 0.53598265   | 0.014272419 | 1.07E-06 | 1 | Kctd12        |
| -0.526528989 | 0.014311436 | 1.07E-06 | 1 | Cyb5r4        |
| -0.365865669 | 0.014463333 | 1.08E-06 | 1 | Rnf166        |

|              |             |          |   |               |
|--------------|-------------|----------|---|---------------|
| -0.272724247 | 0.015098931 | 1.13E-06 | 1 | Atpif1        |
| -0.548937989 | 0.015219249 | 1.14E-06 | 1 | Mrpl38        |
| -0.265735082 | 0.015264122 | 1.14E-06 | 1 | Clec4e        |
| -0.255987489 | 0.015770853 | 1.18E-06 | 1 | S100a13       |
| -0.250639759 | 0.016119151 | 1.21E-06 | 1 | Hcfc1r1       |
| 0.925809756  | 0.016864226 | 1.26E-06 | 1 | Pmaip1        |
| -0.374875285 | 0.017174684 | 1.29E-06 | 1 | Psmc6         |
| -0.690458813 | 0.017257213 | 1.29E-06 | 1 | Ercc1         |
| -0.496939967 | 0.017316049 | 1.30E-06 | 1 | Rangap1       |
| -0.289457452 | 0.017536702 | 1.31E-06 | 1 | Usp5          |
| -0.412981549 | 0.017621282 | 1.32E-06 | 1 | Scp2          |
| -0.368716935 | 0.01791848  | 1.34E-06 | 1 | Nudcd3        |
| -0.455841139 | 0.018265782 | 1.37E-06 | 1 | Gngt2         |
| -0.897714649 | 0.018290649 | 1.37E-06 | 1 | Ttyh2         |
| -0.411148606 | 0.018383449 | 1.38E-06 | 1 | Tmem60        |
| -0.273088362 | 0.019206525 | 1.44E-06 | 1 | Rab22a        |
| -0.384245684 | 0.019379495 | 1.45E-06 | 1 | Mmp14         |
| -0.679311474 | 0.019827014 | 1.48E-06 | 1 | Apeh          |
| -0.256027694 | 0.019853428 | 1.49E-06 | 1 | Zranb2        |
| -0.333993869 | 0.02030168  | 1.52E-06 | 1 | Stx8          |
| -0.370475956 | 0.020644757 | 1.55E-06 | 1 | Arhgap1       |
| -0.278449263 | 0.02126066  | 1.59E-06 | 1 | Ngdn          |
| -0.40862961  | 0.022426189 | 1.68E-06 | 1 | Emb           |
| -0.439926148 | 0.023088555 | 1.73E-06 | 1 | Rnf5          |
| -0.647327718 | 0.023483186 | 1.76E-06 | 1 | Trp53inp2     |
| -0.413738244 | 0.023497424 | 1.76E-06 | 1 | Rit1          |
| -0.571613299 | 0.023699049 | 1.77E-06 | 1 | 1600002K03Rik |
| -0.468779069 | 0.023699552 | 1.77E-06 | 1 | Polr2i        |
| -0.424533632 | 0.024467693 | 1.83E-06 | 1 | Eif3b         |
| -0.337875524 | 0.024595297 | 1.84E-06 | 1 | Puf60         |
| -0.274785084 | 0.024759324 | 1.85E-06 | 1 | Ufc1          |
| -0.627963567 | 0.02510729  | 1.88E-06 | 1 | L1cam         |
| -0.435305778 | 0.025250866 | 1.89E-06 | 1 | Acp5          |
| -0.438407281 | 0.025825701 | 1.93E-06 | 1 | Prdx4         |
| -0.510061158 | 0.025937324 | 1.94E-06 | 1 | Timm50        |
| -0.310997316 | 0.026089523 | 1.95E-06 | 1 | Asap1         |
| -0.284701506 | 0.028928262 | 2.17E-06 | 1 | Tbcb          |
| -0.388392444 | 0.029152469 | 2.18E-06 | 1 | Mrpl53        |
| -0.31342911  | 0.029482889 | 2.21E-06 | 1 | Mrpl17        |
| -0.757098274 | 0.029527651 | 2.21E-06 | 1 | Plrg1         |
| -0.367216633 | 0.030377845 | 2.28E-06 | 1 | Sulf2         |
| -0.358756499 | 0.03044541  | 2.28E-06 | 1 | Tmem189       |
| -0.53842656  | 0.030664466 | 2.30E-06 | 1 | Mrps17        |
| -0.607340736 | 0.032635895 | 2.44E-06 | 1 | Slc27a1       |
| 0.758844687  | 0.032792366 | 2.46E-06 | 1 | Cited2        |
| -0.315892683 | 0.032871292 | 2.46E-06 | 1 | Slc25a5       |
| -0.502391308 | 0.033035802 | 2.47E-06 | 1 | Gnptab        |
| -0.265477915 | 0.033118534 | 2.48E-06 | 1 | Timm22        |
| 1.047245637  | 0.033732619 | 2.53E-06 | 1 | Ptger4        |
| -0.335150447 | 0.034141659 | 2.56E-06 | 1 | Rwdd1         |
| -0.371022424 | 0.034497815 | 2.58E-06 | 1 | Clk4          |
| 0.268694976  | 0.034581233 | 2.59E-06 | 1 | Mir6236       |
| -0.283154389 | 0.035459742 | 2.66E-06 | 1 | Stx12         |
| -0.519616738 | 0.036659478 | 2.75E-06 | 1 | Gmps          |
| -0.25930469  | 0.03720326  | 2.79E-06 | 1 | Slmo2         |
| -0.637485314 | 0.037228824 | 2.79E-06 | 1 | Gpd2          |
| 0.745348945  | 0.037235556 | 2.79E-06 | 1 | Rnd3          |
| -0.421500393 | 0.037575273 | 2.81E-06 | 1 | Bhlhe41       |
| -0.371403812 | 0.03802396  | 2.85E-06 | 1 | Emc6          |
| 0.562512009  | 0.038240154 | 2.86E-06 | 1 | Arrb2         |
| -0.250602243 | 0.038773036 | 2.90E-06 | 1 | Lrp1          |

|              |             |          |   |               |
|--------------|-------------|----------|---|---------------|
| -0.425739528 | 0.038817517 | 2.91E-06 | 1 | Bcas2         |
| -0.339627313 | 0.03945484  | 2.95E-06 | 1 | Tceb1         |
| -0.503770729 | 0.039461909 | 2.96E-06 | 1 | Dhrs7b        |
| -0.509178282 | 0.039517007 | 2.96E-06 | 1 | Rad23a        |
| -0.475734845 | 0.039858512 | 2.99E-06 | 1 | Cul3          |
| -0.572610814 | 0.040759168 | 3.05E-06 | 1 | Sumf1         |
| -0.499567888 | 0.040858394 | 3.06E-06 | 1 | Msra          |
| -0.337431686 | 0.040954935 | 3.07E-06 | 1 | Arl11         |
| -1.136834332 | 0.041290955 | 3.09E-06 | 1 | Il1r2         |
| -0.290697649 | 0.04129883  | 3.09E-06 | 1 | Dnajib11      |
| -0.332297721 | 0.041551272 | 3.11E-06 | 1 | Poldip3       |
| -0.411359613 | 0.042923788 | 3.21E-06 | 1 | Ltbp3         |
| -0.3326367   | 0.043120336 | 3.23E-06 | 1 | Blvrb         |
| -0.288638894 | 0.044401844 | 3.33E-06 | 1 | Keap1         |
| -0.434233153 | 0.045116594 | 3.38E-06 | 1 | Lxn           |
| 0.568692385  | 0.045290882 | 3.39E-06 | 1 | 2900060B14Rik |
| -0.629690543 | 0.04572971  | 3.42E-06 | 1 | Lrpprc        |
| -0.323151488 | 0.045957219 | 3.44E-06 | 1 | Uhrf1bp1l     |
| -0.417242483 | 0.04617068  | 3.46E-06 | 1 | Mfsd6         |
| 0.354457215  | 0.046492352 | 3.48E-06 | 1 | Ccnl1         |
| -0.267081459 | 0.046598568 | 3.49E-06 | 1 | Esy1          |
| -0.278373133 | 0.047364388 | 3.55E-06 | 1 | Scd1          |
| -0.333809871 | 0.047639271 | 3.57E-06 | 1 | Fn1           |
| -0.895511492 | 0.04790799  | 3.59E-06 | 1 | Tgfbrap1      |
| -0.687396711 | 0.048213049 | 3.61E-06 | 1 | Enoph1        |
| -0.488908011 | 0.049990145 | 3.74E-06 | 1 | Dirc2         |
| -0.279316037 | 0.05207797  | 3.90E-06 | 1 | Rala          |
| -0.50915794  | 0.053937581 | 4.04E-06 | 1 | Dpm1          |
| 0.309220213  | 0.054719544 | 4.10E-06 | 1 | Lifr          |
| -0.512969339 | 0.055631362 | 4.17E-06 | 1 | Srp19         |
| -0.543508149 | 0.055973876 | 4.19E-06 | 1 | Anapc15       |
| -0.26625416  | 0.058351075 | 4.37E-06 | 1 | Emc8          |
| -0.326155695 | 0.058604975 | 4.39E-06 | 1 | Cisd2         |
| -0.425342668 | 0.059277977 | 4.44E-06 | 1 | Gstp1         |
| -0.264681649 | 0.059375352 | 4.45E-06 | 1 | Lrrc59        |
| -0.354068728 | 0.059520528 | 4.46E-06 | 1 | Naglu         |
| -0.286050069 | 0.059989829 | 4.49E-06 | 1 | Frrs1         |
| -0.571456905 | 0.060018124 | 4.50E-06 | 1 | Pcbd2         |
| -0.352628459 | 0.060039218 | 4.50E-06 | 1 | Ccng1         |
| -0.279444281 | 0.060442509 | 4.53E-06 | 1 | Cers2         |
| -0.697686859 | 0.061264084 | 4.59E-06 | 1 | Mphosph8      |
| -0.352342109 | 0.063354773 | 4.74E-06 | 1 | Selm          |
| -0.308982626 | 0.064944957 | 4.86E-06 | 1 | Tusc2         |
| -0.331599111 | 0.065209522 | 4.88E-06 | 1 | Taf9          |
| -0.505116928 | 0.065924944 | 4.94E-06 | 1 | Ccser2        |
| -0.453218581 | 0.067330964 | 5.04E-06 | 1 | Itgb7         |
| -0.403769184 | 0.068032475 | 5.10E-06 | 1 | Phpt1         |
| -0.609126315 | 0.069911959 | 5.24E-06 | 1 | Hsd3b7        |
| -0.741443902 | 0.07058675  | 5.29E-06 | 1 | Arl2          |
| -0.433593906 | 0.072206712 | 5.41E-06 | 1 | Vac14         |
| -0.454650551 | 0.073806858 | 5.53E-06 | 1 | Atg5          |
| 0.365633532  | 0.074035368 | 5.54E-06 | 1 | Cd83          |
| -0.522704373 | 0.077666757 | 5.82E-06 | 1 | Nat6          |
| -0.421507637 | 0.078315781 | 5.87E-06 | 1 | Aco2          |
| -0.555588798 | 0.079363012 | 5.94E-06 | 1 | Mrpl34        |
| -0.570950767 | 0.080705583 | 6.04E-06 | 1 | Mfge8         |
| -0.261292709 | 0.081848583 | 6.13E-06 | 1 | Wfdc17        |
| -0.267139966 | 0.082513937 | 6.18E-06 | 1 | Ppm1g         |
| -0.338317592 | 0.083778881 | 6.27E-06 | 1 | Mkl1          |
| -0.499978108 | 0.085482436 | 6.40E-06 | 1 | Mrps34        |
| -0.258236515 | 0.086218424 | 6.46E-06 | 1 | Gatad2a       |



|              |             |          |   |               |        |
|--------------|-------------|----------|---|---------------|--------|
| -0.424431807 | 0.086984423 | 6.51E-06 | 1 | Dpm2          |        |
| -0.375344558 | 0.090156044 | 6.75E-06 | 1 | Ndfip1        |        |
| -0.285981573 | 0.090204941 | 6.76E-06 | 1 | Coa5          |        |
| -0.62832316  | 0.090533969 | 6.78E-06 | 1 | Plxna1        |        |
| -0.431221725 | 0.090739276 | 6.80E-06 | 1 |               | Sep.11 |
| -0.252612197 | 0.091144371 | 6.83E-06 | 1 | Napa          |        |
| -0.500243891 | 0.092180575 | 6.90E-06 | 1 | Trnau1ap      |        |
| -0.470275339 | 0.093988828 | 7.04E-06 | 1 | Dpy30         |        |
| -0.446975956 | 0.094612448 | 7.09E-06 | 1 | Lsm1          |        |
| -0.567679824 | 0.09612949  | 7.20E-06 | 1 | Snhg3         |        |
| -0.252732152 | 0.098194557 | 7.35E-06 | 1 | Mrpl24        |        |
| -0.547808568 | 0.099767118 | 7.47E-06 | 1 | Thoc1         |        |
| -0.836387215 | 0.100716617 | 7.54E-06 | 1 | Ece2          |        |
| -0.325803676 | 0.101244425 | 7.58E-06 | 1 | Cd84          |        |
| -0.339286787 | 0.102712402 | 7.69E-06 | 1 | Tmem134       |        |
| -0.576999161 | 0.103380886 | 7.74E-06 | 1 | Chst11        |        |
| -0.394712409 | 0.104302275 | 7.81E-06 | 1 | Mrps6         |        |
| -0.543906157 | 0.104487647 | 7.83E-06 | 1 | Wdr74         |        |
| -0.285745463 | 0.104701557 | 7.84E-06 | 1 | Dhx15         |        |
| -0.309062908 | 0.106562742 | 7.98E-06 | 1 | Pdlim1        |        |
| -0.364836285 | 0.106901264 | 8.01E-06 | 1 | 1700123O20Rik |        |
| -0.275158559 | 0.108108168 | 8.10E-06 | 1 | Tpp1          |        |
| -0.441804871 | 0.109950026 | 8.23E-06 | 1 | Tm2d3         |        |
| -0.448609852 | 0.110077132 | 8.24E-06 | 1 | Ubap1         |        |
| 0.281192824  | 0.113128586 | 8.47E-06 | 1 | Ifi27l2a      |        |
| -0.296954548 | 0.117937182 | 8.83E-06 | 1 | Syt11         |        |
| -0.624476703 | 0.117998338 | 8.84E-06 | 1 | Ykt6          |        |
| -0.437455869 | 0.119423457 | 8.94E-06 | 1 | Fopnl         |        |
| -0.552525666 | 0.120054562 | 8.99E-06 | 1 | Srxn1         |        |
| -0.456847683 | 0.121048047 | 9.07E-06 | 1 | Cipc          |        |
| -0.521791486 | 0.123784991 | 9.27E-06 | 1 | Alas1         |        |
| -0.576201134 | 0.123854948 | 9.28E-06 | 1 | Tars2         |        |
| -0.58920944  | 0.126844395 | 9.50E-06 | 1 | Polr3k        |        |
| -0.480378123 | 0.127494409 | 9.55E-06 | 1 | Tex264        |        |
| -0.417177781 | 0.129094038 | 9.67E-06 | 1 | Acbd3         |        |
| -0.403967375 | 0.132187798 | 9.90E-06 | 1 | Mtmt10        |        |
| -0.379365868 | 0.133731555 | 1.00E-05 | 1 | Jtb           |        |
| -0.34620183  | 0.134732739 | 1.01E-05 | 1 | Mea1          |        |
| -0.37400919  | 0.135656906 | 1.02E-05 | 1 | Psen1         |        |
| -0.252267648 | 0.145400784 | 1.09E-05 | 1 | Map7d1        |        |
| -0.373282788 | 0.149289724 | 1.12E-05 | 1 | Atmin         |        |
| -0.409777378 | 0.150236047 | 1.13E-05 | 1 | Bre           |        |
| -0.668082753 | 0.150323193 | 1.13E-05 | 1 | Rnf14         |        |
| -0.895080682 | 0.152540996 | 1.14E-05 | 1 | Sdhaf2        |        |
| -0.43924346  | 0.153539453 | 1.15E-05 | 1 | Triap1        |        |
| -0.571169306 | 0.154694105 | 1.16E-05 | 1 | Trim35        |        |
| -0.33817508  | 0.157381764 | 1.18E-05 | 1 | Tmem205       |        |
| -0.250342681 | 0.159113833 | 1.19E-05 | 1 | Tmed10        |        |
| -0.370684301 | 0.16018153  | 1.20E-05 | 1 | Ndufb3        |        |
| -0.309413475 | 0.161796491 | 1.21E-05 | 1 | Babam1        |        |
| -0.337968322 | 0.162283575 | 1.22E-05 | 1 | Lsm14a        |        |
| -0.267114517 | 0.162623471 | 1.22E-05 | 1 | Slc39a7       |        |
| -0.311339136 | 0.163122214 | 1.22E-05 | 1 | Comm1d1       |        |
| -0.398055045 | 0.165427201 | 1.24E-05 | 1 | Fam104a       |        |
| -0.440778726 | 0.169797217 | 1.27E-05 | 1 | Cox16         |        |
| -0.251535406 | 0.17075407  | 1.28E-05 | 1 | Suclg1        |        |
| 0.28805468   | 0.170942107 | 1.28E-05 | 1 | Rpl18a        |        |
| -0.354526464 | 0.171068692 | 1.28E-05 | 1 | Mmp12         |        |
| -0.365172347 | 0.1723632   | 1.29E-05 | 1 | Vti1b         |        |
| -0.364123683 | 0.172877604 | 1.29E-05 | 1 | Mrpl35        |        |
| -0.383028942 | 0.177892541 | 1.33E-05 | 1 | Mapkap1       |        |

|              |             |          |   |               |
|--------------|-------------|----------|---|---------------|
| -0.254456526 | 0.179427092 | 1.34E-05 | 1 | Cetn3         |
| -0.271044685 | 0.184784343 | 1.38E-05 | 1 | Psme2b        |
| -0.430011985 | 0.187440284 | 1.40E-05 | 1 | Actr10        |
| -0.780707359 | 0.188252338 | 1.41E-05 | 1 | Dmxl2         |
| 0.715329768  | 0.189805151 | 1.42E-05 | 1 | Ier2          |
| 0.323240449  | 0.194321645 | 1.46E-05 | 1 | Sat1          |
| 0.455568039  | 0.200391317 | 1.50E-05 | 1 | Hpgd          |
| -0.259243266 | 0.201045431 | 1.51E-05 | 1 | Chchd2        |
| -0.461491219 | 0.202731074 | 1.52E-05 | 1 | Agap1         |
| 0.546470809  | 0.20419692  | 1.53E-05 | 1 | Icosl         |
| 0.384099415  | 0.205097055 | 1.54E-05 | 1 | Isg15         |
| -0.384477879 | 0.207796533 | 1.56E-05 | 1 | Glr2          |
| -0.515112467 | 0.219828364 | 1.65E-05 | 1 | Ndr3          |
| -0.325492631 | 0.22040876  | 1.65E-05 | 1 | Ccdc174       |
| -0.371008018 | 0.220928848 | 1.65E-05 | 1 | Csrp1         |
| -0.361781275 | 0.223390342 | 1.67E-05 | 1 | St13          |
| -0.43052796  | 0.2268539   | 1.70E-05 | 1 | Otud4         |
| -0.425342324 | 0.229481228 | 1.72E-05 | 1 | Fmn1          |
| -0.412795532 | 0.238083725 | 1.78E-05 | 1 | Tmem120a      |
| -0.295598431 | 0.239513005 | 1.79E-05 | 1 | Ostc          |
| -0.396794453 | 0.241204048 | 1.81E-05 | 1 | Mrps23        |
| -0.280412378 | 0.241455106 | 1.81E-05 | 1 | Nifk          |
| -0.562113924 | 0.250369548 | 1.88E-05 | 1 | Nkiras2       |
| -0.55740744  | 0.256863243 | 1.92E-05 | 1 | Dnajc4        |
| -0.262824207 | 0.257924301 | 1.93E-05 | 1 | Rhoc          |
| -0.499912853 | 0.263515369 | 1.97E-05 | 1 | Adss          |
| -0.384332091 | 0.265464902 | 1.99E-05 | 1 | Uqcrb         |
| -0.461713006 | 0.266871637 | 2.00E-05 | 1 | Galnt7        |
| -0.410379368 | 0.27990082  | 2.10E-05 | 1 | Clcc1         |
| -0.410729306 | 0.28168683  | 2.11E-05 | 1 | Cd276         |
| 0.834692099  | 0.284297865 | 2.13E-05 | 1 | Bbc3          |
| -0.414133305 | 0.285439959 | 2.14E-05 | 1 | Nop14         |
| -0.377392637 | 0.289723061 | 2.17E-05 | 1 | Rsb1          |
| -0.36182777  | 0.297207813 | 2.23E-05 | 1 | Metap1d       |
| -0.251409394 | 0.298982992 | 2.24E-05 | 1 | Nol7          |
| -0.411740445 | 0.301204641 | 2.26E-05 | 1 | Eif2b4        |
| -0.297983505 | 0.302523512 | 2.27E-05 | 1 | Polr2g        |
| -0.318594317 | 0.303055926 | 2.27E-05 | 1 | Vps11         |
| -0.410279579 | 0.306489071 | 2.30E-05 | 1 | 20100120O5Rik |
| 0.39895828   | 0.311334875 | 2.33E-05 | 1 | Pld4          |
| -0.300558081 | 0.312381466 | 2.34E-05 | 1 | Fyn           |
| -0.396910695 | 0.32628789  | 2.44E-05 | 1 | Timm17b       |
| -0.274699898 | 0.328588466 | 2.46E-05 | 1 | Ccdc124       |
| -0.301108051 | 0.333031427 | 2.49E-05 | 1 | Prelid1       |
| -0.600777547 | 0.337245781 | 2.53E-05 | 1 | Tmem11        |
| -0.451852652 | 0.347556743 | 2.60E-05 | 1 | Adam9         |
| -0.38658917  | 0.375465046 | 2.81E-05 | 1 | Pbdc1         |
| -0.546731287 | 0.381304001 | 2.86E-05 | 1 | Dhx8          |
| 0.285445779  | 0.389696555 | 2.92E-05 | 1 | Ubc           |
| -0.290827596 | 0.389913916 | 2.92E-05 | 1 | Snrnp25       |
| -0.306882955 | 0.402876168 | 3.02E-05 | 1 | Wapal         |
| -0.456796466 | 0.4031795   | 3.02E-05 | 1 | Plcl2         |
| -0.478766527 | 0.405109105 | 3.03E-05 | 1 | Ethe1         |
| -0.328054627 | 0.405539381 | 3.04E-05 | 1 | Msmo1         |
| -0.72137031  | 0.409535061 | 3.07E-05 | 1 | Flrt3         |
| -0.51131227  | 0.420296851 | 3.15E-05 | 1 | Farsb         |
| -0.739849101 | 0.424939725 | 3.18E-05 | 1 | Ddhd1         |
| 0.35243085   | 0.429971087 | 3.22E-05 | 1 | 4632428N05Rik |
| -0.38761747  | 0.433487288 | 3.25E-05 | 1 | Hmgn5         |
| -0.29882529  | 0.436006678 | 3.27E-05 | 1 | Trappc5       |
| -0.460031846 | 0.438181913 | 3.28E-05 | 1 | Mkl2          |

|              |             |          |   |               |
|--------------|-------------|----------|---|---------------|
| -0.398265382 | 0.448056972 | 3.36E-05 | 1 | Slc35b1       |
| 0.939522587  | 0.449578891 | 3.37E-05 | 1 | Tmem119       |
| -0.572788404 | 0.451511898 | 3.38E-05 | 1 | Kcnab2        |
| -0.325485066 | 0.454151396 | 3.40E-05 | 1 | Gnptg         |
| 0.881285325  | 0.456440741 | 3.42E-05 | 1 | Col14a1       |
| -0.312085886 | 0.461975931 | 3.46E-05 | 1 | Arid2         |
| -0.286331043 | 0.466110952 | 3.49E-05 | 1 | Smad4         |
| -0.284244706 | 0.466763185 | 3.50E-05 | 1 | Brcc3         |
| -0.49741197  | 0.467858243 | 3.50E-05 | 1 | Ilf3          |
| -0.270482802 | 0.482013725 | 3.61E-05 | 1 | Rac2          |
| -0.28286927  | 0.49097736  | 3.68E-05 | 1 | Eif4ebp1      |
| -0.429167853 | 0.495293332 | 3.71E-05 | 1 | Heatr3        |
| 0.576347973  | 0.501086945 | 3.75E-05 | 1 | Plbd1         |
| -0.346371191 | 0.509666505 | 3.82E-05 | 1 | Rad23b        |
| -0.250672594 | 0.512648293 | 3.84E-05 | 1 | Mrps14        |
| 0.712025362  | 0.516865601 | 3.87E-05 | 1 | Cyp27a1       |
| -0.484779822 | 0.520020332 | 3.89E-05 | 1 | Tubb4b        |
| -0.51311182  | 0.573574005 | 4.30E-05 | 1 | Slc16a3       |
| -0.306313107 | 0.580789633 | 4.35E-05 | 1 | Ppp1r14b      |
| 0.367670603  | 0.596099432 | 4.46E-05 | 1 | Cd72          |
| -0.356638976 | 0.60170785  | 4.51E-05 | 1 | Tssc1         |
| -0.340711637 | 0.609413606 | 4.56E-05 | 1 | Zc3h15        |
| -0.449804499 | 0.61042651  | 4.57E-05 | 1 | Gipc1         |
| -0.500404994 | 0.628784594 | 4.71E-05 | 1 | Dcun1d5       |
| -0.514450416 | 0.641324935 | 4.80E-05 | 1 | Ndufaf3       |
| -0.285484298 | 0.643032721 | 4.82E-05 | 1 | Ddx1          |
| -0.469162403 | 0.644307882 | 4.83E-05 | 1 | Mrps25        |
| -0.269489337 | 0.654499326 | 4.90E-05 | 1 | Rc3h1         |
| -0.253847832 | 0.666626335 | 4.99E-05 | 1 | Acot9         |
| -0.954588218 | 0.677741483 | 5.08E-05 | 1 | Plac8         |
| -0.251344036 | 0.712234728 | 5.33E-05 | 1 | Ebna1bp2      |
| -0.281906687 | 0.714195901 | 5.35E-05 | 1 | Nagpa         |
| -0.646843647 | 0.721307675 | 5.40E-05 | 1 | Slc39a11      |
| -0.470178112 | 0.723908845 | 5.42E-05 | 1 | Agfg1         |
| -0.291541789 | 0.733568299 | 5.49E-05 | 1 | Cpd           |
| -0.563342418 | 0.74575257  | 5.59E-05 | 1 | 1110008P14Rik |
| -0.391939364 | 0.745916564 | 5.59E-05 | 1 | Mkln1         |
| -0.42361732  | 0.750484971 | 5.62E-05 | 1 | Xpo1          |
| -0.499703885 | 0.759408561 | 5.69E-05 | 1 | Tmem223       |
| -0.611847035 | 0.767599332 | 5.75E-05 | 1 | Hnrnp1l       |
| -0.408401852 | 0.769472142 | 5.76E-05 | 1 | Ergic1        |
| -0.275204706 | 0.80111525  | 6.00E-05 | 1 | Mitf          |
| -0.360615263 | 0.805691548 | 6.03E-05 | 1 | Jak2          |
| -0.403180436 | 0.821874175 | 6.16E-05 | 1 | Cd9           |
| -0.382978015 | 0.84083571  | 6.30E-05 | 1 | Slc31a1       |
| 0.31637298   | 0.844580849 | 6.33E-05 | 1 | Fyb           |
| -0.34286552  | 0.847702762 | 6.35E-05 | 1 | Preb          |
| -0.316422687 | 0.855193807 | 6.40E-05 | 1 | Vapb          |
| -0.470832173 | 0.855682876 | 6.41E-05 | 1 | Clec4n        |
| -0.403651901 | 0.888695315 | 6.66E-05 | 1 | Zfand2b       |
| -0.285663871 | 0.88912617  | 6.66E-05 | 1 | Fam3c         |
| -0.281470598 | 0.93538022  | 7.01E-05 | 1 | Mmd           |
| 0.461342126  | 0.938730331 | 7.03E-05 | 1 | Fosb          |
| -0.298869818 | 0.941543923 | 7.05E-05 | 1 | 0610012G03Rik |
| -0.362119388 | 0.944108717 | 7.07E-05 | 1 | Tbc1d22a      |
| -0.499312321 | 0.95816869  | 7.18E-05 | 1 | Epb4.1        |
| -0.724736977 | 0.97626592  | 7.31E-05 | 1 | Slc25a19      |
| -0.476543702 | 0.987682061 | 7.40E-05 | 1 | Sh3bp5        |
| -0.610722394 | 1           | 7.56E-05 | 1 | Adssl1        |
| -0.274294608 | 1           | 7.58E-05 | 1 | Arhgap10      |
| 0.470584713  | 1           | 7.82E-05 | 1 | Hmga2-ps1     |

|              |   |           |   |               |
|--------------|---|-----------|---|---------------|
| 0.306961866  | 1 | 7.84E-05  | 1 | Scamp4        |
| -0.36587349  | 1 | 7.87E-05  | 1 | Mfsd5         |
| -0.457618834 | 1 | 7.87E-05  | 1 | Tmx2          |
| 0.403581532  | 1 | 7.97E-05  | 1 | Sdc4          |
| -0.728644213 | 1 | 8.14E-05  | 1 | Srprb         |
| -0.36180316  | 1 | 8.38E-05  | 1 | G6pdx         |
| -0.355015362 | 1 | 8.40E-05  | 1 | 2310009A05Rik |
| 0.313457233  | 1 | 8.69E-05  | 1 | Cd14          |
| -0.602739221 | 1 | 9.01E-05  | 1 | Tspan3        |
| -0.507475652 | 1 | 9.32E-05  | 1 | Ttc13         |
| -0.289887013 | 1 | 9.45E-05  | 1 | 1110038B12Rik |
| 0.630952639  | 1 | 9.64E-05  | 1 | Fgd2          |
| -0.277011783 | 1 | 9.80E-05  | 1 | Vegfb         |
| -0.33643726  | 1 | 9.93E-05  | 1 | Vegfa         |
| -0.446025187 | 1 | 0.0001026 | 1 | Ptplb         |
| -0.300879135 | 1 | 0.0001029 | 1 | Htra2         |
| -0.708632764 | 1 | 0.0001039 | 1 | Dohh          |
| -0.564853069 | 1 | 0.0001056 | 1 | Cops7a        |
| 0.290024614  | 1 | 0.0001073 | 1 | 2810004N23Rik |
| -0.515548228 | 1 | 0.0001102 | 1 | Gpr108        |
| -0.268145243 | 1 | 0.0001121 | 1 | Lars          |
| -0.37962613  | 1 | 0.0001129 | 1 | Leprot        |
| -0.539095914 | 1 | 0.0001146 | 1 | Slc35e4       |
| -0.364774343 | 1 | 0.0001149 | 1 | Yme1l1        |
| -0.288554699 | 1 | 0.0001155 | 1 | Snx6          |
| -0.455232831 | 1 | 0.0001175 | 1 | Nelfe         |
| -0.685507705 | 1 | 0.0001181 | 1 | Srm           |
| -0.25574553  | 1 | 0.0001196 | 1 | Ttc1          |
| -0.29853038  | 1 | 0.0001213 | 1 | Mbd1          |
| -0.512972195 | 1 | 0.0001216 | 1 | Adi1          |
| -0.314058795 | 1 | 0.0001239 | 1 | Psmc11        |
| -0.268348666 | 1 | 0.000125  | 1 | Atp6v1h       |
| -0.34995171  | 1 | 0.0001255 | 1 | Cnot1         |
| -0.373427866 | 1 | 0.0001258 | 1 | Elof1         |
| -0.394632183 | 1 | 0.0001263 | 1 | Mrpl3         |
| -0.280940036 | 1 | 0.0001279 | 1 | Gtpbp4        |
| -0.785584295 | 1 | 0.0001285 | 1 | Lmf2          |
| -0.348917193 | 1 | 0.0001292 | 1 | Pmpca         |
| -0.271790364 | 1 | 0.0001295 | 1 | Pnpla2        |
| -0.306709756 | 1 | 0.000133  | 1 | Rusc2         |
| -0.288402587 | 1 | 0.0001371 | 1 | Ap3m1         |
| -0.354274824 | 1 | 0.0001377 | 1 | Trim41        |
| -0.651578095 | 1 | 0.000138  | 1 | Vhl           |
| -0.368837545 | 1 | 0.0001381 | 1 | Trappc6a      |
| -0.288940808 | 1 | 0.0001413 | 1 | Tmem87b       |
| -0.321727844 | 1 | 0.0001416 | 1 | Gnai3         |
| -0.33072646  | 1 | 0.0001424 | 1 | Prpf6         |
| -0.268982762 | 1 | 0.0001425 | 1 | E430025E21Rik |
| -0.566928509 | 1 | 0.000143  | 1 | Mcm6          |
| -0.272695225 | 1 | 0.000144  | 1 | Pi4k2a        |
| -0.379600569 | 1 | 0.0001448 | 1 | Plekha1       |
| -0.447527652 | 1 | 0.0001504 | 1 | Ranbp10       |
| -0.305657098 | 1 | 0.0001508 | 1 | Emc2          |
| -0.31222355  | 1 | 0.0001514 | 1 | Dnajc7        |
| -0.313582119 | 1 | 0.0001515 | 1 | Snx4          |
| -0.312768907 | 1 | 0.0001518 | 1 | Ndufs1        |
| -0.261292212 | 1 | 0.0001519 | 1 | Capn2         |
| -0.458878429 | 1 | 0.0001551 | 1 | Trmt1         |
| -0.3110333   | 1 | 0.000159  | 1 | Sfxn1         |
| -0.482841653 | 1 | 0.0001613 | 1 | Eepd1         |
| -0.265477915 | 1 | 0.0001634 | 1 | Pkp4          |

|              |   |           |   |               |
|--------------|---|-----------|---|---------------|
| -0.452690288 | 1 | 0.000164  | 1 | Mmp19         |
| -0.284242985 | 1 | 0.0001648 | 1 | Rpp21         |
| 0.317271613  | 1 | 0.0001675 | 1 | Mir703        |
| -0.297698749 | 1 | 0.0001686 | 1 | Fblim1        |
| -0.380280049 | 1 | 0.0001736 | 1 | Nxt1          |
| -0.331952241 | 1 | 0.0001737 | 1 | Tmem86a       |
| -0.257867111 | 1 | 0.0001767 | 1 | Rnpepl1       |
| -0.340464587 | 1 | 0.0001776 | 1 | Pitpnb        |
| -0.301467565 | 1 | 0.000179  | 1 | Lrp12         |
| -0.388794639 | 1 | 0.0001808 | 1 | Parp4         |
| 0.516895448  | 1 | 0.0001811 | 1 | Ccnd1         |
| 0.560503425  | 1 | 0.0001823 | 1 | Dpysl2        |
| -0.252584281 | 1 | 0.0001831 | 1 | Csnk1g2       |
| -0.55817756  | 1 | 0.000191  | 1 | Egln1         |
| -0.328551222 | 1 | 0.0001911 | 1 | Dgkz          |
| -0.404718607 | 1 | 0.0001945 | 1 | Nsmce1        |
| -0.39444488  | 1 | 0.0001977 | 1 | Eif2ak1       |
| -0.305971437 | 1 | 0.0002001 | 1 | Fbxo22        |
| -0.587942617 | 1 | 0.0002006 | 1 | Jmjd6         |
| -0.272675185 | 1 | 0.0002034 | 1 | Cmc1          |
| 0.327289625  | 1 | 0.0002071 | 1 | Maf           |
| -0.372083076 | 1 | 0.0002116 | 1 | Ube2w         |
| -0.406744389 | 1 | 0.0002142 | 1 | Pdrg1         |
| -0.459255073 | 1 | 0.0002223 | 1 | Cops8         |
| -0.621117998 | 1 | 0.0002225 | 1 | Nqo2          |
| -0.320842008 | 1 | 0.0002254 | 1 | Fibp          |
| -0.440865569 | 1 | 0.0002289 | 1 | Gch1          |
| -0.924057882 | 1 | 0.0002297 | 1 | Cdadcl        |
| -0.427487125 | 1 | 0.00024   | 1 | Esyt2         |
| -0.698542422 | 1 | 0.000242  | 1 | Cd209a        |
| -0.56359797  | 1 | 0.000243  | 1 | 9130401M01Rik |
| -0.335211755 | 1 | 0.0002445 | 1 | Rab12         |
| 0.418466743  | 1 | 0.0002513 | 1 | Cwc27         |
| -0.484720764 | 1 | 0.0002519 | 1 | Cenpa         |
| -0.264506375 | 1 | 0.0002547 | 1 | Mcm3          |
| 0.417134596  | 1 | 0.0002591 | 1 | Idnk          |
| -0.487130608 | 1 | 0.00026   | 1 | Lyst          |
| -0.655567699 | 1 | 0.0002716 | 1 | Isy1          |
| 0.314802572  | 1 | 0.0002757 | 1 | Marcks        |
| -0.485028693 | 1 | 0.0002761 | 1 | Lin7c         |
| -0.313389347 | 1 | 0.0002769 | 1 | Tmem126a      |
| -0.283242836 | 1 | 0.0002803 | 1 | Cmtr1         |
| -0.295912928 | 1 | 0.0002808 | 1 | Napg          |
| -0.492470776 | 1 | 0.0002811 | 1 | Iah1          |
| -0.56834435  | 1 | 0.0002855 | 1 | Dpcd          |
| 0.797965538  | 1 | 0.0002946 | 1 | St3gal6       |
| -0.253872483 | 1 | 0.0002956 | 1 | Tns3          |
| -0.296557685 | 1 | 0.0002968 | 1 | Gtf3c6        |
| -0.440719655 | 1 | 0.0002974 | 1 | Pdcd4         |
| -0.348174281 | 1 | 0.0003002 | 1 | P2rx4         |
| -0.725809545 | 1 | 0.0003075 | 1 | Hgsnat        |
| -0.498034171 | 1 | 0.0003104 | 1 | Kif1c         |
| -0.560808419 | 1 | 0.0003129 | 1 | Ddt           |
| -0.305580774 | 1 | 0.0003322 | 1 | Mkks          |
| -0.328464022 | 1 | 0.0003326 | 1 | Trappc13      |
| -0.450991096 | 1 | 0.0003436 | 1 | Ginm1         |
| -0.410612792 | 1 | 0.0003456 | 1 | Slc38a7       |
| -0.254540778 | 1 | 0.0003474 | 1 | Map2k4        |
| -0.444283744 | 1 | 0.0003561 | 1 | Amdhd2        |
| 0.26110191   | 1 | 0.0003669 | 1 | Siglece       |
| -0.257558453 | 1 | 0.0003718 | 1 | Riok1         |

|              |   |           |   |               |
|--------------|---|-----------|---|---------------|
| 0.28476551   | 1 | 0.0003727 | 1 | Synj2bp       |
| 0.394856494  | 1 | 0.0003907 | 1 | Tlr2          |
| -0.348065066 | 1 | 0.000405  | 1 | H2afv         |
| 0.591903516  | 1 | 0.0004062 | 1 | Ppp1r9b       |
| 0.724860881  | 1 | 0.00041   | 1 | Mndal         |
| -0.276511115 | 1 | 0.0004116 | 1 | Ubxn6         |
| -0.321664546 | 1 | 0.0004162 | 1 | Ubp2          |
| -0.386002245 | 1 | 0.000417  | 1 | Tspan5        |
| -0.383732454 | 1 | 0.000429  | 1 | Sdccag8       |
| 0.399678618  | 1 | 0.0004359 | 1 | Klf2          |
| -0.396024862 | 1 | 0.0004365 | 1 | Syvn1         |
| -0.310857975 | 1 | 0.0004366 | 1 | Srpr          |
| -0.460534348 | 1 | 0.0004378 | 1 | AW112010      |
| -0.319329326 | 1 | 0.0004379 | 1 | Agpat4        |
| -0.267684408 | 1 | 0.0004405 | 1 | Gpatch8       |
| -0.453350384 | 1 | 0.0004439 | 1 | Mbp           |
| -0.42516465  | 1 | 0.0004478 | 1 | Abcc1         |
| -0.482530486 | 1 | 0.0004497 | 1 | Brap          |
| 0.647866933  | 1 | 0.0004525 | 1 | Fam46a        |
| -0.345869595 | 1 | 0.0004545 | 1 | Trak2         |
| -0.479272818 | 1 | 0.0004579 | 1 | Yipf5         |
| -0.600358276 | 1 | 0.000458  | 1 | Nr1h3         |
| -0.497834004 | 1 | 0.0004766 | 1 | Kif3a         |
| -0.278534529 | 1 | 0.0004781 | 1 | Smc3          |
| -0.597628485 | 1 | 0.0004806 | 1 | Prnp          |
| 0.737374605  | 1 | 0.000508  | 1 | Dst           |
| -0.277997677 | 1 | 0.0005346 | 1 | Fkbp15        |
| -0.325094496 | 1 | 0.0005427 | 1 | Zpr1          |
| -0.325772166 | 1 | 0.000544  | 1 | Polr1c        |
| -0.353925183 | 1 | 0.0005471 | 1 | Ftsj3         |
| -0.791456134 | 1 | 0.0005503 | 1 | Trem1         |
| -0.375791502 | 1 | 0.000551  | 1 | Mgat4b        |
| -0.494667864 | 1 | 0.0005524 | 1 | Dctpp1        |
| -0.383907133 | 1 | 0.0005566 | 1 | Traf7         |
| -0.334012402 | 1 | 0.0005566 | 1 | Sucla2        |
| -0.491235445 | 1 | 0.0005622 | 1 | Cdipt         |
| -0.415464918 | 1 | 0.0005629 | 1 | Vps36         |
| -0.340044807 | 1 | 0.0005726 | 1 | Zmpste24      |
| -0.499027419 | 1 | 0.0005733 | 1 | Mrps12        |
| -0.325578664 | 1 | 0.0005762 | 1 | Snapin        |
| -0.371609677 | 1 | 0.0005807 | 1 | Rtca          |
| -0.325548949 | 1 | 0.0005864 | 1 | Rsl1d1        |
| 0.601376953  | 1 | 0.0006051 | 1 | H2-M3         |
| 0.262463379  | 1 | 0.0006141 | 1 | Gp49a         |
| -0.296149742 | 1 | 0.000616  | 1 | Gnl1          |
| -0.268091894 | 1 | 0.0006166 | 1 | Akr1b10       |
| -0.333532777 | 1 | 0.0006223 | 1 | Znrf1         |
| -0.289659526 | 1 | 0.0006426 | 1 | 2610001J05Rik |
| -0.538275275 | 1 | 0.0006519 | 1 | Mrps26        |
| -0.375689588 | 1 | 0.0006573 | 1 | Cyhr1         |
| 1.126459549  | 1 | 0.0006622 | 1 | Ifit2         |
| -0.417771838 | 1 | 0.0006646 | 1 | Mad2l2        |
| 0.317997272  | 1 | 0.0006895 | 1 | Cdkn1a        |
| -0.392788602 | 1 | 0.0007048 | 1 | Bap1          |
| -0.331170504 | 1 | 0.0007071 | 1 | Uvrag         |
| 0.616530965  | 1 | 0.0007374 | 1 | Ccl12         |
| -0.334995719 | 1 | 0.0007543 | 1 | Exosc8        |
| -0.262393873 | 1 | 0.0007676 | 1 | Poldip2       |
| -0.266104452 | 1 | 0.0007817 | 1 | Mrpl40        |
| -0.289998338 | 1 | 0.0007925 | 1 | Uba5          |
| -0.320399027 | 1 | 0.000795  | 1 | Ldlrap1       |

|              |   |           |   |               |
|--------------|---|-----------|---|---------------|
| -0.27467739  | 1 | 0.0007986 | 1 | Dnajc14       |
| 0.400490818  | 1 | 0.0008192 | 1 | Rgs1          |
| 0.256714738  | 1 | 0.0008289 | 1 | Lrrfip2       |
| -0.476667029 | 1 | 0.0008315 | 1 | Farsa         |
| -0.290524914 | 1 | 0.0008389 | 1 | Clec7a        |
| 0.37094714   | 1 | 0.0008392 | 1 | Wdfy4         |
| -0.338200413 | 1 | 0.0008682 | 1 | Sik3          |
| -0.429615289 | 1 | 0.0008712 | 1 | Ccndbp1       |
| -0.350316688 | 1 | 0.000882  | 1 | Tmem70        |
| -0.305062325 | 1 | 0.0008898 | 1 | Mrpl37        |
| -0.311967619 | 1 | 0.0009021 | 1 | Mpnd          |
| -0.292497651 | 1 | 0.0009204 | 1 | Prorsd1       |
| -0.343532012 | 1 | 0.0009272 | 1 | Setd5         |
| -0.302658836 | 1 | 0.0009323 | 1 | Nup62         |
| -0.317118772 | 1 | 0.0009326 | 1 | Mybbp1a       |
| -0.265591829 | 1 | 0.0009418 | 1 | Erlin1        |
| -0.294900938 | 1 | 0.0009465 | 1 | Akirin1       |
| -0.334469957 | 1 | 0.0009554 | 1 | Plgrkt        |
| -0.423669794 | 1 | 0.0009586 | 1 | Heatr5a       |
| -0.849005679 | 1 | 0.0009652 | 1 | Avpi1         |
| -0.347464388 | 1 | 0.0009715 | 1 | Mcee          |
| -0.470190557 | 1 | 0.001     | 1 | Gmn           |
| -0.52130648  | 1 | 0.0010005 | 1 | Sh2b2         |
| -0.386567896 | 1 | 0.0010129 | 1 | B3gnt2        |
| -0.347900358 | 1 | 0.0010138 | 1 | Tor1a         |
| -0.264182997 | 1 | 0.00102   | 1 | Cnpy3         |
| -1.307184912 | 1 | 0.0010262 | 1 | Ly6c2         |
| -0.540675953 | 1 | 0.0010342 | 1 | Arl6ip5       |
| -0.265958939 | 1 | 0.0010836 | 1 | Gcc2          |
| -0.260819429 | 1 | 0.0010936 | 1 | Mrpl32        |
| -0.345235881 | 1 | 0.0010984 | 1 | Eif1ad        |
| -0.271029944 | 1 | 0.0011104 | 1 | Myl6          |
| 0.399777872  | 1 | 0.0011331 | 1 | Usp4          |
| -0.726211915 | 1 | 0.0011596 | 1 | Ap4s1         |
| -0.30839824  | 1 | 0.0011697 | 1 | Prkch         |
| -0.58700235  | 1 | 0.0011761 | 1 | Mki67         |
| -0.315293282 | 1 | 0.0012129 | 1 | Lap3          |
| -0.263690016 | 1 | 0.0012416 | 1 | Cct7          |
| -0.295566967 | 1 | 0.0012429 | 1 | Zfp598        |
| -0.442377159 | 1 | 0.0012509 | 1 | Cd274         |
| 0.423523272  | 1 | 0.0012708 | 1 | Tnfaip3       |
| 0.985092039  | 1 | 0.001276  | 1 | Ppfia4        |
| 0.66255961   | 1 | 0.0013019 | 1 | Oasl2         |
| -0.251374477 | 1 | 0.0013116 | 1 | Utp3          |
| -0.552796835 | 1 | 0.0013208 | 1 | Pptc7         |
| -0.424745704 | 1 | 0.0013267 | 1 | 2310035C23Rik |
| -0.376654754 | 1 | 0.0013406 | 1 | Gpalpp1       |
| -0.355227271 | 1 | 0.0013443 | 1 | 4921524J17Rik |
| -0.438855465 | 1 | 0.0013489 | 1 | Psmf1         |
| -0.315739467 | 1 | 0.0013621 | 1 | Hint2         |
| -0.401236579 | 1 | 0.0013774 | 1 | Rab28         |
| 0.684216181  | 1 | 0.0013885 | 1 | Abca9         |
| 0.294304639  | 1 | 0.0014249 | 1 | Nbr1          |
| -0.271168819 | 1 | 0.0014494 | 1 | Map2k2        |
| -0.381788179 | 1 | 0.0014522 | 1 | Tpgs1         |
| -0.25976184  | 1 | 0.0014543 | 1 | Pmpcb         |
| 0.344333699  | 1 | 0.0014921 | 1 | Ccl2          |
| -0.451055368 | 1 | 0.0015093 | 1 | Fgd4          |
| -0.677054868 | 1 | 0.0015174 | 1 | Pop7          |
| -0.368206976 | 1 | 0.0015255 | 1 | Gsr           |
| 0.666780706  | 1 | 0.0015455 | 1 | Rqcd1         |

|              |   |           |   |          |
|--------------|---|-----------|---|----------|
| -0.973081128 | 1 | 0.0015464 | 1 | Tbc1d4   |
| -0.378773015 | 1 | 0.0015486 | 1 | Fam213b  |
| -0.302677473 | 1 | 0.0015515 | 1 | Xpnpep1  |
| -0.479727838 | 1 | 0.0016076 | 1 | Cdc16    |
| -0.319631781 | 1 | 0.0016205 | 1 | Irf3     |
| -0.600354648 | 1 | 0.00163   | 1 | Ing4     |
| 0.774052736  | 1 | 0.0016385 | 1 | Nlrp3    |
| -0.473101615 | 1 | 0.0016691 | 1 | H2-Oa    |
| -0.342483188 | 1 | 0.0016767 | 1 | Cgrrf1   |
| -0.523187045 | 1 | 0.0016907 | 1 | Cd24a    |
| -0.76503968  | 1 | 0.0017765 | 1 | Ube3b    |
| -0.394909521 | 1 | 0.0018304 | 1 | Ate1     |
| 0.298643555  | 1 | 0.0018417 | 1 | Rad50    |
| 0.281894949  | 1 | 0.0018753 | 1 | Cyth2    |
| -0.468020117 | 1 | 0.0018963 | 1 | Fech     |
| -0.296307039 | 1 | 0.0019107 | 1 | Snrnp200 |
| -0.28036179  | 1 | 0.0019127 | 1 | Fem1c    |
| 0.556184564  | 1 | 0.0019869 | 1 | Pmepa1   |
| 0.659084327  | 1 | 0.0020482 | 1 | Id3      |
| -0.305298756 | 1 | 0.0020621 | 1 | Tmem248  |
| -0.43430562  | 1 | 0.0020695 | 1 | Gclm     |
| -0.268954761 | 1 | 0.0020925 | 1 | Cdc123   |
| -0.38654686  | 1 | 0.0020999 | 1 | Prkar2a  |
| -0.556712717 | 1 | 0.0022249 | 1 | Ap5s1    |
| -0.758661568 | 1 | 0.0022451 | 1 | Agtrap   |
| -0.420739215 | 1 | 0.0022797 | 1 | Gtpbp1   |
| -0.347601094 | 1 | 0.0023067 | 1 | Uckl1    |
| 0.262629939  | 1 | 0.00232   | 1 | Wnk1     |
| -0.452883042 | 1 | 0.0023593 | 1 | Caml     |
| -0.297805234 | 1 | 0.0023963 | 1 | Prcc2b   |
| -0.34512931  | 1 | 0.0024199 | 1 | Rhoh     |
| -0.291369579 | 1 | 0.0024542 | 1 | Tmem57   |
| -0.492417578 | 1 | 0.002567  | 1 | Pank2    |
| -0.391851043 | 1 | 0.0025908 | 1 | Prpf31   |
| -0.275027335 | 1 | 0.0025939 | 1 | Sfmbt1   |
| -0.603022391 | 1 | 0.0026394 | 1 | Ifitm1   |
| 0.331561256  | 1 | 0.0026458 | 1 | Rgs2     |
| 0.31248601   | 1 | 0.0027195 | 1 | Tpd52    |
| -0.3840293   | 1 | 0.0028297 | 1 | Arl5c    |
| 0.806647175  | 1 | 0.002883  | 1 | Rtp4     |
| -0.251142335 | 1 | 0.0029116 | 1 | Aqr      |
| 0.631809716  | 1 | 0.0029188 | 1 | Fgl2     |
| -0.328132154 | 1 | 0.0030286 | 1 | Mrpl11   |
| -0.393640499 | 1 | 0.0030525 | 1 | Flot1    |
| -0.291746085 | 1 | 0.0030786 | 1 | Vta1     |
| 0.782213336  | 1 | 0.0031341 | 1 | Trerf1   |
| -0.354912704 | 1 | 0.0031722 | 1 | Yeats4   |
| -0.386442404 | 1 | 0.003184  | 1 | Lta4h    |
| 0.270217962  | 1 | 0.0031908 | 1 | Gm1821   |
| 0.799676244  | 1 | 0.0032037 | 1 | Arhgap4  |
| -0.415727893 | 1 | 0.0032342 | 1 | Sep.06   |
| 0.597095429  | 1 | 0.0033375 | 1 |          |
| 0.278846331  | 1 | 0.0034004 | 1 | Oasl1    |
| -0.300359147 | 1 | 0.0034038 | 1 | Stt3b    |
| -0.277265321 | 1 | 0.003473  | 1 | Dlst     |
| -0.46010658  | 1 | 0.0035608 | 1 | Osbp19   |
| 0.29304488   | 1 | 0.0035841 | 1 | Pigyl    |
| -0.336852353 | 1 | 0.0036623 | 1 | Atp2b1   |
| 0.296236016  | 1 | 0.0037098 | 1 | Anapc4   |
| 0.972071611  | 1 | 0.0037367 | 1 | Ly86     |
| -0.401507813 | 1 | 0.0037767 | 1 | Clec4b1  |
|              |   |           |   | Faf1     |



|              |   |           |   |               |
|--------------|---|-----------|---|---------------|
| -0.361970905 | 1 | 0.003791  | 1 | Smarcb1       |
| -0.288958089 | 1 | 0.0038228 | 1 | Rsf1          |
| -0.252095448 | 1 | 0.0038354 | 1 | Milr1         |
| -0.452969907 | 1 | 0.0038426 | 1 | Hspbp1        |
| 0.584599001  | 1 | 0.0038648 | 1 | Rcsd1         |
| -0.265654762 | 1 | 0.003903  | 1 | Ppp6r3        |
| -0.575519134 | 1 | 0.0039616 | 1 | Gpr126        |
| -0.26758796  | 1 | 0.0039802 | 1 | Mettl6        |
| -0.496506939 | 1 | 0.0039839 | 1 | Hmg20b        |
| -0.702326803 | 1 | 0.0039882 | 1 | Top2a         |
| -0.327159641 | 1 | 0.004109  | 1 | Ppp2r5e       |
| -0.463763624 | 1 | 0.0041514 | 1 | Ccnk          |
| -0.25302683  | 1 | 0.0043628 | 1 | Lrrc47        |
| -0.348234497 | 1 | 0.0043677 | 1 | Twistnb       |
| 0.525238953  | 1 | 0.0043769 | 1 | Camk1d        |
| -0.370732122 | 1 | 0.0043936 | 1 | Imp3          |
| 0.631068292  | 1 | 0.0044294 | 1 | Setd1b        |
| -0.496933966 | 1 | 0.0044956 | 1 | AB041803      |
| -0.369686586 | 1 | 0.0045073 | 1 | Zfp120        |
| 0.522018027  | 1 | 0.0045315 | 1 | Lcp2          |
| -0.314511372 | 1 | 0.0046197 | 1 | Otub1         |
| -0.260945646 | 1 | 0.0047012 | 1 | Nbeal1        |
| -0.571157873 | 1 | 0.0047264 | 1 | Bloc1s6       |
| -0.350492403 | 1 | 0.004825  | 1 | Emd           |
| 0.323147854  | 1 | 0.004826  | 1 | Fam49b        |
| -0.454099829 | 1 | 0.004881  | 1 | Cul4b         |
| -0.302323303 | 1 | 0.0050643 | 1 | AA467197      |
| -0.477470603 | 1 | 0.0051463 | 1 | Abhd17c       |
| -0.524995709 | 1 | 0.0051864 | 1 | Foxo1         |
| -0.410276764 | 1 | 0.005221  | 1 | Fam114a2      |
| -0.309227811 | 1 | 0.0052984 | 1 | Lrrc8a        |
| -0.2950848   | 1 | 0.0053207 | 1 | Thoc6         |
| -0.418163588 | 1 | 0.0053361 | 1 | Mefv          |
| -0.387655874 | 1 | 0.0053511 | 1 | Tpcn1         |
| -0.281960864 | 1 | 0.0054864 | 1 | Glg1          |
| -0.315242499 | 1 | 0.0055377 | 1 | Eaf1          |
| -0.280554656 | 1 | 0.005834  | 1 | Eapp          |
| -0.314764509 | 1 | 0.0058579 | 1 | Phf20         |
| -0.36487831  | 1 | 0.0059713 | 1 | 2310022A10Rik |
| -0.271035123 | 1 | 0.005991  | 1 | Plekha1       |
| -0.338406459 | 1 | 0.0060307 | 1 | N6amt2        |
| -1.008917119 | 1 | 0.0062463 | 1 | Il6st         |
| -0.368548572 | 1 | 0.0065534 | 1 | Hs6st1        |
| 0.476744047  | 1 | 0.0067008 | 1 | Gm6377        |
| 0.554513354  | 1 | 0.0067351 | 1 | Rassf2        |
| -0.39955986  | 1 | 0.0068007 | 1 | Eif2b5        |
| -0.381342842 | 1 | 0.0069699 | 1 | Cdk18         |
| 0.311769547  | 1 | 0.0071715 | 1 | Cyth4         |
| -1.167361382 | 1 | 0.0073803 | 1 | Gpx3          |
| -0.253765345 | 1 | 0.0075755 | 1 | Ptplad1       |
| 0.373459208  | 1 | 0.0076245 | 1 | Rcbtb2        |
| 0.27151578   | 1 | 0.0083196 | 1 | Srek1ip1      |
| -0.298214596 | 1 | 0.0084079 | 1 | Ctnnbl1       |
| -0.582445914 | 1 | 0.0084543 | 1 | Arl6ip4       |
| 0.596381009  | 1 | 0.0084829 | 1 | Uba7          |
| 0.273439183  | 1 | 0.0084888 | 1 | D17Wsu92e     |
| -0.418398121 | 1 | 0.0088045 | 1 | Cnot7         |
| 0.570120192  | 1 | 0.0089072 | 1 | Trim30d       |
| 0.262541333  | 1 | 0.0090256 | 1 | Actr3         |
| 0.286598928  | 1 | 0.00915   | 1 | Ptprj         |
| 0.425027189  | 1 | 0.0093625 | 1 | Ehd4          |

|              |          |           |   |          |
|--------------|----------|-----------|---|----------|
| -0.261662977 | 1        | 0.0093661 | 1 | Tollip   |
| -0.316810247 | 1        | 0.009426  | 1 | Ide      |
| 0.372487567  | 1        | 0.0095933 | 1 | Tspan14  |
| 0.493362022  | 1        | 0.0096673 | 1 | Parp8    |
| -0.278899895 | 1        | 0.0097261 | 1 | Bop1     |
| -0.4509074   | 1        | 0.0097445 | 1 | Zbtb17   |
| -0.36361116  | 1        | 0.0099371 | 1 | Nolc1    |
| 2.035701005  | 2.87E-78 | 2.15E-82  | 2 | F13a1    |
| 1.918975143  | 4.61E-74 | 3.46E-78  | 2 | Cbr2     |
| 2.349116348  | 7.31E-70 | 5.48E-74  | 2 | Lyve1    |
| 1.570407869  | 9.99E-69 | 7.48E-73  | 2 | Pf4      |
| 1.768802224  | 5.48E-63 | 4.11E-67  | 2 | Folr2    |
| 1.379209861  | 9.07E-63 | 6.79E-67  | 2 | Mrc1     |
| 1.052778531  | 4.69E-61 | 3.51E-65  | 2 | Sepp1    |
| 1.955935035  | 2.66E-60 | 1.99E-64  | 2 | C4b      |
| 1.713172369  | 2.63E-55 | 1.97E-59  | 2 | Gas6     |
| 2.068689077  | 2.52E-54 | 1.89E-58  | 2 | Cd163    |
| 1.512491369  | 8.26E-53 | 6.19E-57  | 2 | Maf      |
| 1.524941076  | 4.39E-52 | 3.29E-56  | 2 | Fcgrt    |
| 1.009540859  | 3.20E-49 | 2.39E-53  | 2 | Trf      |
| 1.493678906  | 4.25E-46 | 3.18E-50  | 2 | Cfh      |
| 1.909469089  | 1.12E-45 | 8.38E-50  | 2 | Ltc4s    |
| 1.145736468  | 2.17E-43 | 1.62E-47  | 2 | Stab1    |
| 0.919213183  | 2.76E-43 | 2.07E-47  | 2 | Dab2     |
| 1.540449541  | 4.78E-43 | 3.58E-47  | 2 | Igfbp4   |
| 2.049872414  | 7.66E-42 | 5.74E-46  | 2 | Ccl24    |
| -1.682056958 | 9.30E-40 | 6.96E-44  | 2 | Gngt2    |
| 1.065508168  | 3.20E-39 | 2.40E-43  | 2 | Ifi2712a |
| -0.968669698 | 4.61E-39 | 3.45E-43  | 2 | Lgals3   |
| 1.507200671  | 1.05E-37 | 7.89E-42  | 2 | Lifr     |
| -1.600782739 | 1.55E-37 | 1.16E-41  | 2 | Cd9      |
| 1.836800485  | 3.48E-37 | 2.61E-41  | 2 | Timd4    |
| 1.843923961  | 6.96E-37 | 5.21E-41  | 2 | Ccl8     |
| 0.670845095  | 1.30E-36 | 9.73E-41  | 2 | Serinc3  |
| 2.237443258  | 2.33E-35 | 1.75E-39  | 2 | Ednrb    |
| 1.877583111  | 2.14E-34 | 1.60E-38  | 2 | Selenbp1 |
| 1.838176249  | 5.94E-34 | 4.45E-38  | 2 | Fxyd2    |
| 2.154929359  | 7.09E-34 | 5.31E-38  | 2 | Fcna     |
| -1.424676267 | 7.19E-34 | 5.38E-38  | 2 | Spp1     |
| 1.897314937  | 1.26E-33 | 9.45E-38  | 2 | Chp2     |
| 1.664303747  | 4.62E-33 | 3.46E-37  | 2 | Stard8   |
| -1.738237217 | 8.18E-33 | 6.13E-37  | 2 | Mmp12    |
| 1.833845363  | 1.13E-32 | 8.46E-37  | 2 | Fgfr1    |
| 0.748981629  | 1.77E-31 | 1.32E-35  | 2 | Ly6e     |
| -0.975175897 | 4.84E-31 | 3.62E-35  | 2 | Mpeg1    |
| 1.30342653   | 1.05E-30 | 7.86E-35  | 2 | Txnip    |
| 1.588247167  | 1.43E-30 | 1.07E-34  | 2 | Sult1a1  |
| 1.681955642  | 1.66E-30 | 1.24E-34  | 2 | Clec10a  |
| 1.639519596  | 3.85E-29 | 2.89E-33  | 2 | C6       |
| 1.264846073  | 9.40E-29 | 7.04E-33  | 2 | Rnasel   |
| -0.983983749 | 9.73E-29 | 7.29E-33  | 2 | Cd44     |
| -0.948465765 | 1.69E-28 | 1.27E-32  | 2 | Basp1    |
| 1.712448599  | 7.77E-28 | 5.82E-32  | 2 | Plekhg5  |
| -1.414792253 | 1.47E-27 | 1.10E-31  | 2 | Bhlhe40  |
| 1.145382466  | 1.62E-27 | 1.21E-31  | 2 | Mgl2     |
| 2.013302997  | 1.99E-27 | 1.49E-31  | 2 | Rcn3     |
| 0.801554813  | 2.43E-27 | 1.82E-31  | 2 | Ccl6     |
| 1.65259218   | 2.60E-27 | 1.95E-31  | 2 | Lyl1     |
| 0.930081482  | 6.36E-27 | 4.76E-31  | 2 | Jun      |
| -1.758216779 | 1.58E-26 | 1.18E-30  | 2 | Il7r     |
| -1.805101569 | 2.38E-26 | 1.79E-30  | 2 | Adam8    |

|                    |                 |                 |          |              |
|--------------------|-----------------|-----------------|----------|--------------|
| 1.812535939        | 3.53E-26        | 2.64E-30        | 2        | Colec12      |
| -1.277902736       | 4.18E-26        | 3.13E-30        | 2        | Abcg1        |
| 0.57655155         | 4.85E-26        | 3.63E-30        | 2        | C1qa         |
| 1.299972014        | 1.27E-25        | 9.48E-30        | 2        | Itsn1        |
| -1.157359988       | 1.34E-25        | 1.01E-29        | 2        | Lpl          |
| 1.518653571        | 2.78E-25        | 2.08E-29        | 2        | Tmod1        |
| 1.151916832        | 3.06E-25        | 2.29E-29        | 2        | Slco2b1      |
| 2.229837983        | 3.20E-25        | 2.40E-29        | 2        | Retnla       |
| 0.954413657        | 4.63E-25        | 3.47E-29        | 2        | Abca9        |
| <b>0.604254287</b> | <b>5.05E-25</b> | <b>3.78E-29</b> | <b>2</b> | <b>Csf1r</b> |
| 1.4821265          | 5.12E-25        | 3.83E-29        | 2        | Cp           |
| -0.805008402       | 7.48E-25        | 5.61E-29        | 2        | Cd52         |
| -1.582908088       | 1.09E-24        | 8.18E-29        | 2        | Itgax        |
| 0.493386735        | 1.98E-24        | 1.48E-28        | 2        | C1qc         |
| -0.970466246       | 4.15E-24        | 3.11E-28        | 2        | Rgs1         |
| 1.536922117        | 1.79E-23        | 1.34E-27        | 2        | Pla2g2d      |
| 0.66595018         | 1.94E-23        | 1.45E-27        | 2        | Ifitm3       |
| 1.067589653        | 2.86E-23        | 2.14E-27        | 2        | Hspa1a       |
| -1.239168928       | 7.19E-23        | 5.38E-27        | 2        | Cytip        |
| -1.867987752       | 7.91E-23        | 5.93E-27        | 2        | Gpnmb        |
| 1.258262024        | 8.55E-23        | 6.40E-27        | 2        | Alox5        |
| 1.270250925        | 2.31E-22        | 1.73E-26        | 2        | Gpr34        |
| -1.489141029       | 2.45E-22        | 1.83E-26        | 2        | Il1rn        |
| 2.195785103        | 3.07E-22        | 2.30E-26        | 2        | Cd209f       |
| -1.68030532        | 3.15E-22        | 2.36E-26        | 2        | Lhfpl2       |
| 1.867269427        | 4.24E-22        | 3.17E-26        | 2        | Vsig4        |
| -0.891687529       | 4.76E-22        | 3.57E-26        | 2        | Lsp1         |
| 0.977748778        | 5.01E-22        | 3.75E-26        | 2        | Ap2a2        |
| 0.715380406        | 7.68E-22        | 5.75E-26        | 2        | Cd81         |
| 0.404539254        | 1.48E-21        | 1.11E-25        | 2        | C1qb         |
| 1.00462163         | 2.72E-21        | 2.03E-25        | 2        | Eps15        |
| 0.824238547        | 3.53E-21        | 2.64E-25        | 2        | Glul         |
| -1.25555055        | 4.10E-21        | 3.07E-25        | 2        | Glipr1       |
| 1.130166271        | 1.20E-20        | 9.02E-25        | 2        | Wwp1         |
| 0.642680625        | 2.22E-20        | 1.67E-24        | 2        | Ctsc         |
| 0.66739808         | 7.49E-20        | 5.61E-24        | 2        | Tmem176b     |
| -0.504493566       | 8.80E-20        | 6.59E-24        | 2        | Cyba         |
| -0.720937101       | 1.86E-19        | 1.39E-23        | 2        | Sqstm1       |
| -0.922793429       | 1.95E-19        | 1.46E-23        | 2        | S100a11      |
| 0.975881476        | 2.04E-19        | 1.53E-23        | 2        | Hspa1b       |
| 1.178560475        | 2.08E-19        | 1.56E-23        | 2        | Bmp2         |
| 0.801131792        | 2.47E-19        | 1.85E-23        | 2        | Cfp          |
| 0.723813801        | 3.88E-19        | 2.91E-23        | 2        | Rhob         |
| -1.553062925       | 3.90E-19        | 2.92E-23        | 2        | Tgm2         |
| 1.053206993        | 4.09E-19        | 3.07E-23        | 2        | Klf2         |
| 1.25337649         | 5.13E-19        | 3.84E-23        | 2        | Hpgd         |
| -0.606402539       | 6.66E-19        | 4.99E-23        | 2        | Atox1        |
| 1.270338965        | 1.63E-18        | 1.22E-22        | 2        | Ddx60        |
| 0.866071391        | 1.68E-18        | 1.26E-22        | 2        | Rnase4       |
| 1.484004435        | 2.46E-18        | 1.84E-22        | 2        | Cmah         |
| 1.021015483        | 2.50E-18        | 1.88E-22        | 2        | Etv1         |
| 1.705650931        | 2.57E-18        | 1.92E-22        | 2        | Cd209g       |
| 1.156097931        | 3.25E-18        | 2.44E-22        | 2        | Rin2         |
| -0.880957737       | 3.93E-18        | 2.95E-22        | 2        | Fam129b      |
| -0.758155857       | 6.84E-18        | 5.12E-22        | 2        | Anxa2        |
| -0.996623293       | 1.03E-17        | 7.72E-22        | 2        | Slc15a3      |
| -1.505321915       | 1.11E-17        | 8.29E-22        | 2        | Sema4d       |
| 0.906814191        | 1.20E-17        | 8.97E-22        | 2        | Sema4a       |
| -0.857582103       | 1.38E-17        | 1.03E-21        | 2        | S100a6       |
| -1.107101749       | 1.92E-17        | 1.44E-21        | 2        | Syng1        |

|              |          |          |   |            |
|--------------|----------|----------|---|------------|
| -0.656569571 | 2.20E-17 | 1.65E-21 | 2 | Pkm        |
| -0.613048575 | 2.32E-17 | 1.74E-21 | 2 | Cxcl16     |
| -1.272497246 | 2.33E-17 | 1.74E-21 | 2 | Plaur      |
| -0.925322672 | 3.05E-17 | 2.29E-21 | 2 | Sgk1       |
| 0.639301001  | 3.30E-17 | 2.47E-21 | 2 | Ehd4       |
| 1.062400733  | 4.87E-17 | 3.65E-21 | 2 | P2ry12     |
| 1.29610276   | 5.07E-17 | 3.80E-21 | 2 | P2ry13     |
| 1.119862971  | 5.34E-17 | 4.00E-21 | 2 | Bank1      |
| 0.946216969  | 1.07E-16 | 7.99E-21 | 2 | Pisd-ps1   |
| 0.38660588   | 1.10E-16 | 8.22E-21 | 2 | Lyz2       |
| -0.961665552 | 1.14E-16 | 8.54E-21 | 2 | S100a4     |
| -0.858937122 | 1.33E-16 | 9.98E-21 | 2 | Taldo1     |
| -0.794834155 | 2.56E-16 | 1.92E-20 | 2 | Capg       |
| 1.221155205  | 2.91E-16 | 2.18E-20 | 2 | Reps2      |
| 1.165981419  | 3.75E-16 | 2.81E-20 | 2 | Gbp7       |
| 1.158710915  | 3.93E-16 | 2.95E-20 | 2 | Smagp      |
| -1.50955971  | 4.39E-16 | 3.29E-20 | 2 | Hilpda     |
| -0.730978826 | 5.56E-16 | 4.17E-20 | 2 | Gm2a       |
| -1.061923678 | 9.37E-16 | 7.02E-20 | 2 | Gde1       |
| -0.946195153 | 1.36E-15 | 1.02E-19 | 2 | Aprt       |
| -0.806920326 | 1.62E-15 | 1.21E-19 | 2 | Psmb6      |
| -1.150112344 | 2.65E-15 | 1.99E-19 | 2 | Actn1      |
| -0.973698518 | 3.65E-15 | 2.74E-19 | 2 | Tnfaip2    |
| 0.871742755  | 3.70E-15 | 2.77E-19 | 2 | Gas7       |
| -0.836174535 | 4.62E-15 | 3.46E-19 | 2 | Rnh1       |
| -0.880154096 | 6.20E-15 | 4.64E-19 | 2 | Anxa1      |
| -1.145163623 | 6.83E-15 | 5.12E-19 | 2 | Clec4d     |
| -1.114691298 | 6.86E-15 | 5.14E-19 | 2 | Rilpl2     |
| -1.299595825 | 7.59E-15 | 5.68E-19 | 2 | Mmp14      |
| -0.672127322 | 8.72E-15 | 6.53E-19 | 2 | Plin2      |
| -1.255313094 | 9.09E-15 | 6.81E-19 | 2 | Cdk18      |
| 1.090953593  | 9.38E-15 | 7.02E-19 | 2 | Lrp6       |
| -1.61810375  | 1.30E-14 | 9.70E-19 | 2 | Ndrp1      |
| -1.678076221 | 1.34E-14 | 1.00E-18 | 2 | Clec4e     |
| 0.99685428   | 2.29E-14 | 1.71E-18 | 2 | Ms4a6b     |
| -1.051943247 | 2.50E-14 | 1.87E-18 | 2 | Slamf7     |
| -0.826118748 | 2.50E-14 | 1.87E-18 | 2 | Alcam      |
| 0.940391184  | 2.63E-14 | 1.97E-18 | 2 | Tsc22d3    |
| -1.412493586 | 2.98E-14 | 2.23E-18 | 2 | Acp5       |
| 1.283134103  | 3.66E-14 | 2.74E-18 | 2 | Tns1       |
| -1.101484049 | 4.95E-14 | 3.71E-18 | 2 | Dpep2      |
| -1.089223705 | 7.44E-14 | 5.57E-18 | 2 | Gpr137b-ps |
| 0.836301722  | 8.26E-14 | 6.19E-18 | 2 | Fcgr2b     |
| -1.054853827 | 1.09E-13 | 8.17E-18 | 2 | Gpr137b    |
| 0.588374872  | 2.04E-13 | 1.53E-17 | 2 | Nrp1       |
| 1.496448059  | 2.15E-13 | 1.61E-17 | 2 | Trpv4      |
| 0.54724463   | 2.77E-13 | 2.07E-17 | 2 | Fcgr3      |
| 0.79377451   | 2.95E-13 | 2.21E-17 | 2 | Fcrls      |
| 1.29004679   | 3.18E-13 | 2.38E-17 | 2 | Sesn1      |
| -0.958754609 | 3.29E-13 | 2.47E-17 | 2 | Txnrd1     |
| -0.695729123 | 3.41E-13 | 2.55E-17 | 2 | Skil       |
| 1.295343366  | 4.67E-13 | 3.50E-17 | 2 | Siglec1    |
| -1.253581703 | 4.78E-13 | 3.58E-17 | 2 | Smim3      |
| -0.401875691 | 6.08E-13 | 4.55E-17 | 2 | Fxyd5      |
| -0.838856756 | 6.57E-13 | 4.92E-17 | 2 | Mdm2       |
| -1.134113334 | 7.43E-13 | 5.56E-17 | 2 | Rnf128     |
| 0.482008801  | 7.92E-13 | 5.93E-17 | 2 | Pltp       |
| -1.40190778  | 9.78E-13 | 7.32E-17 | 2 | Pdpn       |
| 0.281681859  | 9.96E-13 | 7.46E-17 | 2 | Cst3       |
| 0.752515113  | 1.06E-12 | 7.95E-17 | 2 | Snx2       |
| -0.651637688 | 1.33E-12 | 9.93E-17 | 2 | Cstb       |

|              |          |          |   |           |
|--------------|----------|----------|---|-----------|
| 0.332896045  | 1.37E-12 | 1.02E-16 | 2 | Itm2b     |
| -1.170309651 | 1.66E-12 | 1.24E-16 | 2 | Ezr       |
| -0.425914282 | 1.71E-12 | 1.28E-16 | 2 | Vim       |
| -0.363889244 | 2.02E-12 | 1.51E-16 | 2 | Rpl41     |
| 0.844599008  | 2.26E-12 | 1.69E-16 | 2 | Ap1b1     |
| 1.015912729  | 2.57E-12 | 1.92E-16 | 2 | Pepd      |
| 0.558512205  | 2.59E-12 | 1.94E-16 | 2 | Timp2     |
| -1.262295163 | 3.70E-12 | 2.77E-16 | 2 | Il1b      |
| -0.605711902 | 4.23E-12 | 3.17E-16 | 2 | Id2       |
| -0.689881056 | 4.39E-12 | 3.29E-16 | 2 | Atp6v1c1  |
| -1.205826951 | 6.22E-12 | 4.66E-16 | 2 | Emb       |
| -1.446750625 | 6.39E-12 | 4.79E-16 | 2 | Igf2r     |
| -0.8756646   | 6.74E-12 | 5.05E-16 | 2 | Clec7a    |
| 1.417705832  | 8.23E-12 | 6.16E-16 | 2 | Gm4951    |
| -0.533102868 | 1.20E-11 | 8.95E-16 | 2 | Srgn      |
| 0.475960359  | 1.23E-11 | 9.18E-16 | 2 | Cltc      |
| 0.597121001  | 1.33E-11 | 9.96E-16 | 2 | Ccl9      |
| -0.613013896 | 1.34E-11 | 1.00E-15 | 2 | Slc3a2    |
| -1.323963867 | 1.38E-11 | 1.03E-15 | 2 | Galnt6    |
| -0.810197157 | 1.41E-11 | 1.05E-15 | 2 | Pld3      |
| 0.670149249  | 1.41E-11 | 1.06E-15 | 2 | C5ar1     |
| -0.895720943 | 1.72E-11 | 1.29E-15 | 2 | Lat2      |
| 0.493948643  | 1.84E-11 | 1.38E-15 | 2 | Marcks    |
| -1.042712922 | 1.89E-11 | 1.42E-15 | 2 | Tspan13   |
| 0.72820629   | 2.30E-11 | 1.72E-15 | 2 | Tgfb2     |
| 1.152225492  | 3.18E-11 | 2.38E-15 | 2 | Npl       |
| -1.375563016 | 3.37E-11 | 2.53E-15 | 2 | Slc6a8    |
| -0.540743732 | 3.40E-11 | 2.54E-15 | 2 | Atp6v0e   |
| 1.03768091   | 3.51E-11 | 2.63E-15 | 2 | Slc9a9    |
| -0.958667731 | 3.65E-11 | 2.73E-15 | 2 | Pfkf      |
| -0.731299685 | 3.75E-11 | 2.81E-15 | 2 | Lrrfip1   |
| -1.136700937 | 4.62E-11 | 3.46E-15 | 2 | Pqlc1     |
| -1.275839476 | 5.18E-11 | 3.88E-15 | 2 | Gpr132    |
| 0.870011043  | 5.49E-11 | 4.11E-15 | 2 | Sgpp1     |
| -0.591658668 | 5.66E-11 | 4.24E-15 | 2 | Nceh1     |
| -0.816818671 | 6.15E-11 | 4.61E-15 | 2 | Stx3      |
| -0.598735074 | 7.56E-11 | 5.66E-15 | 2 | Vdac2     |
| -0.981596997 | 7.96E-11 | 5.96E-15 | 2 | Fam107b   |
| 1.016086649  | 9.25E-11 | 6.93E-15 | 2 | Cebpd     |
| 0.858182474  | 9.40E-11 | 7.04E-15 | 2 | Nfxl1     |
| -0.903043328 | 1.04E-10 | 7.82E-15 | 2 | Cd72      |
| 1.443050571  | 1.11E-10 | 8.34E-15 | 2 | Cfb       |
| 0.963622492  | 1.35E-10 | 1.01E-14 | 2 | Rab11fip5 |
| -1.713912696 | 1.44E-10 | 1.08E-14 | 2 | Acot7     |
| -0.742296769 | 1.44E-10 | 1.08E-14 | 2 | Csf2rb    |
| -0.40158738  | 2.03E-10 | 1.52E-14 | 2 | Gnas      |
| -0.786104069 | 2.16E-10 | 1.62E-14 | 2 | Prdx6     |
| 1.01834876   | 2.39E-10 | 1.79E-14 | 2 | Serpinb8  |
| -0.8667732   | 2.55E-10 | 1.91E-14 | 2 | Zfand2a   |
| -1.195949525 | 3.33E-10 | 2.50E-14 | 2 | Napsa     |
| -0.62752888  | 4.01E-10 | 3.00E-14 | 2 | Csrnp1    |
| -0.518447416 | 4.33E-10 | 3.24E-14 | 2 | AF251705  |
| -0.99447968  | 4.41E-10 | 3.30E-14 | 2 | Anpep     |
| -0.869192906 | 4.44E-10 | 3.33E-14 | 2 | Vasp      |
| -0.906269498 | 4.47E-10 | 3.35E-14 | 2 | Abr       |
| -0.62841234  | 4.68E-10 | 3.51E-14 | 2 | Tgfb1     |
| -0.732942592 | 4.86E-10 | 3.64E-14 | 2 | Ccrl2     |
| -0.318395176 | 6.23E-10 | 4.67E-14 | 2 | Ctsz      |
| -0.983090434 | 6.96E-10 | 5.21E-14 | 2 | Malt1     |
| -0.845403243 | 7.19E-10 | 5.39E-14 | 2 | Ybx3      |
| -0.75053487  | 7.75E-10 | 5.81E-14 | 2 | Esd       |

|              |          |          |   |               |
|--------------|----------|----------|---|---------------|
| 0.644193874  | 8.01E-10 | 6.00E-14 | 2 | Ninj1         |
| -1.007953423 | 8.58E-10 | 6.42E-14 | 2 | Hvcn1         |
| -0.694223847 | 1.11E-09 | 8.29E-14 | 2 | Gdf15         |
| 0.541134443  | 1.19E-09 | 8.90E-14 | 2 | Pmp22         |
| -0.683807073 | 1.24E-09 | 9.27E-14 | 2 | Nme1          |
| -0.55419611  | 1.41E-09 | 1.05E-13 | 2 | Litaf         |
| -0.542785763 | 1.41E-09 | 1.06E-13 | 2 | Gsto1         |
| -1.445308838 | 1.58E-09 | 1.19E-13 | 2 | Scd1          |
| 0.922578278  | 1.75E-09 | 1.31E-13 | 2 | Ptgs1         |
| -0.713807098 | 1.83E-09 | 1.37E-13 | 2 | Fyn           |
| -0.788036912 | 2.17E-09 | 1.62E-13 | 2 | Psmc4         |
| 0.719332171  | 2.47E-09 | 1.85E-13 | 2 | Blvrb         |
| -0.934795249 | 2.53E-09 | 1.89E-13 | 2 | Atp8b4        |
| -0.825643632 | 2.63E-09 | 1.97E-13 | 2 | 2010111I01Rik |
| 0.905391021  | 2.97E-09 | 2.22E-13 | 2 | Gda           |
| -0.57064016  | 3.43E-09 | 2.57E-13 | 2 | Pde4b         |
| -0.414113516 | 3.90E-09 | 2.92E-13 | 2 | Atp5e         |
| -1.159073969 | 3.98E-09 | 2.98E-13 | 2 | Scd2          |
| -1.269902623 | 4.67E-09 | 3.50E-13 | 2 | Kcnn4         |
| -0.529487725 | 4.78E-09 | 3.58E-13 | 2 | Lmna          |
| -0.529758561 | 5.22E-09 | 3.91E-13 | 2 | Arl4c         |
| 0.57882      | 5.42E-09 | 4.06E-13 | 2 | Ccl7          |
| 1.044985117  | 6.10E-09 | 4.57E-13 | 2 | Adap2         |
| 0.633230557  | 6.67E-09 | 5.00E-13 | 2 | Hmox1         |
| -0.690299031 | 8.03E-09 | 6.01E-13 | 2 | Axl           |
| -0.869333442 | 9.29E-09 | 6.95E-13 | 2 | Mrpl20        |
| 0.840249691  | 9.69E-09 | 7.26E-13 | 2 | Aoah          |
| -1.101832702 | 1.03E-08 | 7.72E-13 | 2 | Gpr35         |
| -1.315163456 | 1.08E-08 | 8.06E-13 | 2 | Cyfp2         |
| -0.558423835 | 1.08E-08 | 8.12E-13 | 2 | Txn1          |
| -0.795323722 | 1.22E-08 | 9.17E-13 | 2 | Pik3r5        |
| 0.822194097  | 1.24E-08 | 9.30E-13 | 2 | Fam46a        |
| -0.823891076 | 1.34E-08 | 1.01E-12 | 2 | Sod2          |
| -0.686033145 | 1.66E-08 | 1.24E-12 | 2 | Rnf149        |
| -0.622050959 | 1.69E-08 | 1.26E-12 | 2 | Atp6v1a       |
| 1.225632192  | 1.78E-08 | 1.33E-12 | 2 | Il16          |
| 0.62546652   | 1.93E-08 | 1.44E-12 | 2 | Zfp361l       |
| 0.877625829  | 2.04E-08 | 1.53E-12 | 2 | Fgd2          |
| -1.842083111 | 2.14E-08 | 1.60E-12 | 2 | F10           |
| -1.459154067 | 2.24E-08 | 1.67E-12 | 2 | Cd300lf       |
| -0.565691764 | 2.28E-08 | 1.71E-12 | 2 | Pim1          |
| 0.934790151  | 2.44E-08 | 1.82E-12 | 2 | Arsb          |
| -0.750527195 | 2.77E-08 | 2.07E-12 | 2 | Il2rg         |
| -0.512611982 | 2.83E-08 | 2.12E-12 | 2 | Tmsb10        |
| 1.091676053  | 3.09E-08 | 2.32E-12 | 2 | Oas2          |
| 1.058586709  | 3.15E-08 | 2.36E-12 | 2 | Hfe           |
| -0.665027885 | 3.19E-08 | 2.39E-12 | 2 | Psmd8         |
| -0.893763932 | 3.34E-08 | 2.50E-12 | 2 | Timm17a       |
| -0.581610253 | 3.37E-08 | 2.53E-12 | 2 | lfrd1         |
| -0.884261057 | 3.52E-08 | 2.64E-12 | 2 | Got1          |
| 0.903436314  | 3.70E-08 | 2.77E-12 | 2 | Bin1          |
| 1.120768861  | 3.89E-08 | 2.91E-12 | 2 | Dse           |
| 1.259431471  | 4.11E-08 | 3.07E-12 | 2 | Nudt16        |
| 0.801682688  | 4.67E-08 | 3.50E-12 | 2 | Dclre1c       |
| 0.681694502  | 4.95E-08 | 3.71E-12 | 2 | Rab3il1       |
| -1.313627497 | 5.06E-08 | 3.79E-12 | 2 | Slc7a11       |
| 0.524843624  | 5.24E-08 | 3.92E-12 | 2 | Tmem176a      |
| -0.919705241 | 5.60E-08 | 4.20E-12 | 2 | Fn1           |
| -1.089534009 | 6.16E-08 | 4.62E-12 | 2 | Ccl5          |
| 1.001199324  | 6.35E-08 | 4.75E-12 | 2 | Rasgrp3       |
| -0.905971093 | 6.60E-08 | 4.94E-12 | 2 | Ptk2b         |

|              |          |          |   |          |
|--------------|----------|----------|---|----------|
| -1.074501905 | 7.97E-08 | 5.97E-12 | 2 | Fam20c   |
| 0.741857539  | 8.55E-08 | 6.41E-12 | 2 | Tmem8    |
| 0.81365777   | 9.20E-08 | 6.89E-12 | 2 | Snx6     |
| 0.679967461  | 9.65E-08 | 7.23E-12 | 2 | Aldh2    |
| 0.542618845  | 1.10E-07 | 8.26E-12 | 2 | Mafb     |
| -1.285426896 | 1.19E-07 | 8.90E-12 | 2 | Agpat4   |
| -1.58422334  | 1.19E-07 | 8.94E-12 | 2 | Mefv     |
| -0.443796927 | 1.28E-07 | 9.59E-12 | 2 | Fnip2    |
| -0.854161466 | 1.42E-07 | 1.07E-11 | 2 | Csf2rb2  |
| -0.312372046 | 1.46E-07 | 1.09E-11 | 2 | Arpc2    |
| -0.428181734 | 1.48E-07 | 1.11E-11 | 2 | Msn      |
| -0.981716949 | 1.51E-07 | 1.13E-11 | 2 | Dennd4a  |
| -0.436870763 | 1.64E-07 | 1.23E-11 | 2 | Prdx1    |
| 1.000913831  | 1.72E-07 | 1.29E-11 | 2 | Cd33     |
| -0.89346911  | 1.86E-07 | 1.40E-11 | 2 | Pold4    |
| -0.288711485 | 1.90E-07 | 1.42E-11 | 2 | Rpl32    |
| -1.339261542 | 1.91E-07 | 1.43E-11 | 2 | L1cam    |
| 0.415090589  | 1.94E-07 | 1.46E-11 | 2 | Mir6236  |
| -0.769885162 | 2.12E-07 | 1.59E-11 | 2 | Myo1e    |
| -1.200086067 | 2.17E-07 | 1.63E-11 | 2 | Fabp5    |
| 0.903351442  | 2.56E-07 | 1.92E-11 | 2 | Sulf2    |
| 0.993165461  | 2.58E-07 | 1.94E-11 | 2 | Sorbs3   |
| 0.392787499  | 3.02E-07 | 2.26E-11 | 2 | Jund     |
| -0.596706033 | 3.20E-07 | 2.39E-11 | 2 | Skap2    |
| -0.438190487 | 3.20E-07 | 2.40E-11 | 2 | Aldoa    |
| -1.070962341 | 3.50E-07 | 2.62E-11 | 2 | Fgr      |
| -0.483679209 | 3.61E-07 | 2.70E-11 | 2 | Itgb2    |
| 0.387058086  | 3.64E-07 | 2.72E-11 | 2 | Ifitm2   |
| 0.536069299  | 3.75E-07 | 2.81E-11 | 2 | Egr1     |
| 0.37547452   | 3.93E-07 | 2.94E-11 | 2 | Wfdc17   |
| -0.531864753 | 4.25E-07 | 3.18E-11 | 2 | Plec     |
| -1.599786366 | 4.67E-07 | 3.50E-11 | 2 | Apbb2    |
| -1.119127046 | 4.88E-07 | 3.65E-11 | 2 | Slc38a1  |
| 1.099789365  | 4.98E-07 | 3.73E-11 | 2 | Ophn1    |
| -0.290393215 | 5.19E-07 | 3.89E-11 | 2 | Rps14    |
| -1.097397337 | 6.21E-07 | 4.65E-11 | 2 | Tnip1    |
| -0.782937333 | 6.49E-07 | 4.86E-11 | 2 | Bcl2a1b  |
| -1.019896247 | 7.34E-07 | 5.50E-11 | 2 | Elf2     |
| 0.797395595  | 8.23E-07 | 6.16E-11 | 2 | Lpin1    |
| 0.902659808  | 8.51E-07 | 6.38E-11 | 2 | Dusp6    |
| -0.564842921 | 9.33E-07 | 6.98E-11 | 2 | Tgif1    |
| 0.668469044  | 9.48E-07 | 7.10E-11 | 2 | Ccl12    |
| -0.578681565 | 1.02E-06 | 7.65E-11 | 2 | Cct7     |
| 0.824555379  | 1.07E-06 | 7.99E-11 | 2 | Zcchc24  |
| -1.172942557 | 1.09E-06 | 8.18E-11 | 2 | Atp6v0d2 |
| 0.582944753  | 1.21E-06 | 9.09E-11 | 2 | Ssh2     |
| 0.325934647  | 1.26E-06 | 9.41E-11 | 2 | Grn      |
| 0.816363724  | 1.30E-06 | 9.70E-11 | 2 | Vps13c   |
| -0.742526408 | 1.39E-06 | 1.04E-10 | 2 | Tnfsf9   |
| -0.942472232 | 1.44E-06 | 1.08E-10 | 2 | Crem     |
| -0.727424737 | 1.45E-06 | 1.09E-10 | 2 | Itgav    |
| -0.289529423 | 1.55E-06 | 1.16E-10 | 2 | Lilrb4   |
| 0.631775315  | 1.69E-06 | 1.27E-10 | 2 | Mef2c    |
| -0.88816495  | 1.70E-06 | 1.27E-10 | 2 | Ltbp3    |
| 0.759190233  | 1.71E-06 | 1.28E-10 | 2 | Adam15   |
| 1.177879286  | 1.73E-06 | 1.30E-10 | 2 | Rgs18    |
| -1.151572868 | 1.79E-06 | 1.34E-10 | 2 | Cadm1    |
| -0.616498578 | 2.03E-06 | 1.52E-10 | 2 | Adam17   |
| 1.042564894  | 2.18E-06 | 1.63E-10 | 2 | Hrh1     |
| -0.685966124 | 2.24E-06 | 1.67E-10 | 2 | Lrrc59   |
| -1.200093083 | 2.90E-06 | 2.18E-10 | 2 | Tnip3    |

|              |          |          |   |           |
|--------------|----------|----------|---|-----------|
| -0.337813414 | 3.06E-06 | 2.29E-10 | 2 | Iqgap1    |
| -0.822841269 | 3.14E-06 | 2.35E-10 | 2 | Fam96b    |
| -0.437097485 | 3.45E-06 | 2.58E-10 | 2 | Uqcrfs1   |
| -0.274092733 | 3.68E-06 | 2.76E-10 | 2 | Cox4i1    |
| -0.563176937 | 3.72E-06 | 2.78E-10 | 2 | Trappc2l  |
| -0.697446643 | 3.85E-06 | 2.88E-10 | 2 | Tes       |
| -0.448441127 | 3.91E-06 | 2.93E-10 | 2 | Gna13     |
| -1.210326654 | 4.12E-06 | 3.08E-10 | 2 | Chst11    |
| 0.821732713  | 4.25E-06 | 3.18E-10 | 2 | Pros1     |
| 1.020172345  | 4.45E-06 | 3.34E-10 | 2 | Psd3      |
| -0.466598113 | 4.47E-06 | 3.34E-10 | 2 | Rab8b     |
| -0.609134003 | 4.47E-06 | 3.35E-10 | 2 | Surf4     |
| -0.523056095 | 4.65E-06 | 3.48E-10 | 2 | Myl12a    |
| -0.85886254  | 5.53E-06 | 4.14E-10 | 2 | Nlrp3     |
| 0.657476959  | 5.83E-06 | 4.37E-10 | 2 | Cmtm6     |
| -0.411689351 | 5.84E-06 | 4.37E-10 | 2 | Mtpn      |
| -1.180567175 | 6.19E-06 | 4.64E-10 | 2 | Slc2a1    |
| -1.29090047  | 6.22E-06 | 4.66E-10 | 2 | Vegfa     |
| 0.679963101  | 6.32E-06 | 4.74E-10 | 2 | Mpp1      |
| 1.31749748   | 6.39E-06 | 4.79E-10 | 2 | Grap      |
| -0.277639824 | 6.41E-06 | 4.80E-10 | 2 | Rps3      |
| 1.059753267  | 6.92E-06 | 5.19E-10 | 2 | Slc15a2   |
| -1.183980757 | 7.20E-06 | 5.39E-10 | 2 | Mmp19     |
| 0.694269225  | 7.20E-06 | 5.39E-10 | 2 | Clec4a1   |
| 0.474537366  | 7.64E-06 | 5.72E-10 | 2 | Mndal     |
| 0.83819907   | 7.90E-06 | 5.92E-10 | 2 | Ctla2b    |
| -0.4935415   | 7.99E-06 | 5.98E-10 | 2 | Rac2      |
| -1.150020806 | 8.23E-06 | 6.17E-10 | 2 | AA467197  |
| -0.611752149 | 8.83E-06 | 6.61E-10 | 2 | Nab1      |
| 0.410935508  | 9.30E-06 | 6.96E-10 | 2 | Pld4      |
| 1.098026215  | 9.91E-06 | 7.42E-10 | 2 | Dok2      |
| -1.322198349 | 9.96E-06 | 7.46E-10 | 2 | Ctsk      |
| -1.442483069 | 1.03E-05 | 7.73E-10 | 2 | Rab11fip1 |
| -0.575196194 | 1.04E-05 | 7.81E-10 | 2 | Clic4     |
| 0.68693692   | 1.06E-05 | 7.91E-10 | 2 | Rgl1      |
| -0.32508231  | 1.20E-05 | 9.02E-10 | 2 | Anxa5     |
| -0.26325667  | 1.21E-05 | 9.03E-10 | 2 | Gm13826   |
| -0.725663412 | 1.22E-05 | 9.11E-10 | 2 | Psmd1     |
| -0.559120759 | 1.25E-05 | 9.39E-10 | 2 | Zcrb1     |
| -0.412377192 | 1.28E-05 | 9.56E-10 | 2 | Tnfaip3   |
| -1.70012535  | 1.29E-05 | 9.64E-10 | 2 | Npy       |
| -1.069930882 | 1.40E-05 | 1.05E-09 | 2 | AI504432  |
| -0.732135438 | 1.43E-05 | 1.07E-09 | 2 | Msrb1     |
| -1.231489004 | 1.50E-05 | 1.13E-09 | 2 | Arl5c     |
| -0.622603884 | 1.61E-05 | 1.21E-09 | 2 | Edem1     |
| 0.772302143  | 1.62E-05 | 1.22E-09 | 2 | Usp24     |
| -0.857780589 | 1.63E-05 | 1.22E-09 | 2 | Il1r2     |
| -0.960045601 | 1.73E-05 | 1.29E-09 | 2 | Fbxo32    |
| 0.754207448  | 1.78E-05 | 1.33E-09 | 2 | Cyr61     |
| 0.633711527  | 1.83E-05 | 1.37E-09 | 2 | Scamp2    |
| 1.07686888   | 1.87E-05 | 1.40E-09 | 2 | Cxcl13    |
| -0.553751857 | 1.90E-05 | 1.42E-09 | 2 | Furin     |
| 0.888589047  | 2.08E-05 | 1.56E-09 | 2 | Fam213b   |
| -0.758037823 | 2.14E-05 | 1.60E-09 | 2 | Wsb2      |
| -0.588242282 | 2.31E-05 | 1.73E-09 | 2 | Ppp2ca    |
| 0.790608583  | 2.32E-05 | 1.74E-09 | 2 | Sbf2      |
| 0.579091829  | 2.53E-05 | 1.89E-09 | 2 | Tcn2      |
| -1.35087427  | 2.58E-05 | 1.93E-09 | 2 | F7        |
| -0.469889083 | 2.66E-05 | 1.99E-09 | 2 | Tspo      |
| -0.775762774 | 2.90E-05 | 2.17E-09 | 2 | Tbcb      |
| -0.623608051 | 3.08E-05 | 2.30E-09 | 2 | Eif3g     |



|              |             |          |   |               |
|--------------|-------------|----------|---|---------------|
| 0.632019519  | 3.10E-05    | 2.32E-09 | 2 | P2ry6         |
| 0.632329299  | 3.15E-05    | 2.36E-09 | 2 | Marcksl1      |
| -1.11621926  | 3.33E-05    | 2.50E-09 | 2 | Pdlim7        |
| -0.630338674 | 3.37E-05    | 2.52E-09 | 2 | Nhp2          |
| -0.473526088 | 3.58E-05    | 2.68E-09 | 2 | Cd93          |
| -0.487810231 | 3.72E-05    | 2.79E-09 | 2 | Elp5          |
| 0.775004883  | 3.87E-05    | 2.90E-09 | 2 | Tmem37        |
| -0.474644485 | 4.05E-05    | 3.03E-09 | 2 | Cox5a         |
| -0.492858592 | 4.19E-05    | 3.14E-09 | 2 | Psmb1         |
| 0.688503933  | 4.27E-05    | 3.20E-09 | 2 | Usp21         |
| 0.919311278  | 4.54E-05    | 3.40E-09 | 2 | Ctnnd1        |
| -0.523226888 | 4.92E-05    | 3.68E-09 | 2 | Pilra         |
| -0.620503263 | 5.19E-05    | 3.89E-09 | 2 | Cox17         |
| -0.605714625 | 5.28E-05    | 3.96E-09 | 2 | Myo1g         |
| -0.789622425 | 5.59E-05    | 4.19E-09 | 2 | Pdgfa         |
| 0.741845413  | 6.30E-05    | 4.72E-09 | 2 | Myo7a         |
| -1.070733065 | 6.34E-05    | 4.75E-09 | 2 | Lrp12         |
| 1.072823193  | 6.43E-05    | 4.82E-09 | 2 | B3galnt1      |
| -1.067392429 | 6.58E-05    | 4.93E-09 | 2 | Fam46c        |
| -1.095286221 | 6.60E-05    | 4.94E-09 | 2 | Stap1         |
| -0.437370951 | 7.02E-05    | 5.26E-09 | 2 | Esyt1         |
| -0.471466026 | 7.16E-05    | 5.36E-09 | 2 | Ubl3          |
| -0.927932188 | 8.04E-05    | 6.02E-09 | 2 | Havcr2        |
| -0.343131661 | 8.25E-05    | 6.18E-09 | 2 | Psap          |
| -0.891748338 | 8.45E-05    | 6.33E-09 | 2 | Plbd1         |
| -0.354726564 | 0.000100321 | 7.51E-09 | 2 | Tatdn2        |
| -0.463112572 | 0.000102265 | 7.66E-09 | 2 | Nus1          |
| -0.462137711 | 0.000105342 | 7.89E-09 | 2 | Ncf4          |
| -0.553048088 | 0.000107569 | 8.06E-09 | 2 | Anxa4         |
| -1.200051147 | 0.00010774  | 8.07E-09 | 2 | Gsr           |
| -0.721193547 | 0.000116939 | 8.76E-09 | 2 | Snx10         |
| -0.716382313 | 0.000117592 | 8.81E-09 | 2 | Gpd2          |
| 0.41421571   | 0.000124068 | 9.29E-09 | 2 | Unc93b1       |
| 0.701877718  | 0.000131576 | 9.85E-09 | 2 | Nacc2         |
| -0.679849134 | 0.00013686  | 1.03E-08 | 2 | Slc11a2       |
| -0.527699258 | 0.000137634 | 1.03E-08 | 2 | B4galt5       |
| -0.819487687 | 0.000141473 | 1.06E-08 | 2 | Gla           |
| -0.500218297 | 0.000145628 | 1.09E-08 | 2 | Itga5         |
| -0.443704709 | 0.00015519  | 1.16E-08 | 2 | Tax1bp1       |
| 0.323993285  | 0.000159735 | 1.20E-08 | 2 | Kctd12        |
| -0.52604233  | 0.000160805 | 1.20E-08 | 2 | Pgd           |
| -0.465111888 | 0.000165488 | 1.24E-08 | 2 | Cib1          |
| 0.32827417   | 0.000173324 | 1.30E-08 | 2 | Rgs10         |
| -0.441959047 | 0.000200379 | 1.50E-08 | 2 | Rap2a         |
| 0.617800513  | 0.000205903 | 1.54E-08 | 2 | Myo5a         |
| -0.52313835  | 0.000206421 | 1.55E-08 | 2 | Gusb          |
| 0.693875503  | 0.000213899 | 1.60E-08 | 2 | Klf4          |
| -0.47364635  | 0.000223768 | 1.68E-08 | 2 | Cpd           |
| 0.692345798  | 0.000236576 | 1.77E-08 | 2 | 2610507B11Rik |
| -1.159395849 | 0.000250262 | 1.87E-08 | 2 | Cd274         |
| 0.561248459  | 0.000261171 | 1.96E-08 | 2 | Slfn5         |
| -0.460082023 | 0.000261778 | 1.96E-08 | 2 | Slc25a39      |
| -0.628954378 | 0.000282764 | 2.12E-08 | 2 | Cux1          |
| 0.638518476  | 0.000287    | 2.15E-08 | 2 | Cux2          |
| -0.484368086 | 0.000298906 | 2.24E-08 | 2 | Pomp          |
| -0.529814052 | 0.000309028 | 2.31E-08 | 2 | Gclm          |
| -0.594347744 | 0.000333357 | 2.50E-08 | 2 | Tmem43        |
| -0.457829375 | 0.000340498 | 2.55E-08 | 2 | Gadd45b       |
| -0.699242421 | 0.000353822 | 2.65E-08 | 2 | Ak2           |
| 0.885998758  | 0.000369448 | 2.77E-08 | 2 | Dpysl3        |
| -0.519800711 | 0.000372381 | 2.79E-08 | 2 | Grpel1        |

|              |             |          |   |               |
|--------------|-------------|----------|---|---------------|
| 0.782558996  | 0.000392509 | 2.94E-08 | 2 | Gab3          |
| -0.440182739 | 0.000399702 | 2.99E-08 | 2 | Map2k3        |
| -0.865337817 | 0.000428087 | 3.21E-08 | 2 | Ppp1r2        |
| -0.358657817 | 0.000432776 | 3.24E-08 | 2 | Spag9         |
| 0.923950499  | 0.000434859 | 3.26E-08 | 2 | Rasgrp4       |
| 0.510180376  | 0.000468451 | 3.51E-08 | 2 | Gmfg          |
| -0.703894597 | 0.000480467 | 3.60E-08 | 2 | Vps37b        |
| -0.292657461 | 0.000495675 | 3.71E-08 | 2 | Cox6b1        |
| -0.596796159 | 0.000503368 | 3.77E-08 | 2 | Pmepa1        |
| -0.809461842 | 0.000504181 | 3.78E-08 | 2 | Bcl2l11       |
| 0.922477256  | 0.000504379 | 3.78E-08 | 2 | Arhgef12      |
| 0.650632305  | 0.000515825 | 3.86E-08 | 2 | Cyp27a1       |
| 0.903037914  | 0.000534256 | 4.00E-08 | 2 | Idh2          |
| -0.485554161 | 0.000535908 | 4.01E-08 | 2 | Laspl         |
| -0.397498792 | 0.000560747 | 4.20E-08 | 2 | Gsn           |
| 0.705848237  | 0.000621033 | 4.65E-08 | 2 | Ptp4a3        |
| -0.512796912 | 0.000622458 | 4.66E-08 | 2 | Prkar1a       |
| -0.615347843 | 0.000650637 | 4.87E-08 | 2 | Rassf3        |
| -0.538372506 | 0.000680307 | 5.10E-08 | 2 | Nr4a2         |
| -0.764888742 | 0.000720676 | 5.40E-08 | 2 | Runx3         |
| -0.313877917 | 0.000769606 | 5.76E-08 | 2 | Tpm4          |
| -0.368335193 | 0.000775514 | 5.81E-08 | 2 | Sra1          |
| -1.039250034 | 0.000781649 | 5.85E-08 | 2 | Cipc          |
| -0.347036002 | 0.000782401 | 5.86E-08 | 2 | Atf4          |
| 0.829741781  | 0.00080657  | 6.04E-08 | 2 | P2rx7         |
| -0.773473044 | 0.000820692 | 6.15E-08 | 2 | Pbxip1        |
| -1.065614189 | 0.000891814 | 6.68E-08 | 2 | Gfpt1         |
| -0.392482101 | 0.000895519 | 6.71E-08 | 2 | Soat1         |
| -0.406298078 | 0.000916044 | 6.86E-08 | 2 | Smpdl3a       |
| -0.616685917 | 0.00093712  | 7.02E-08 | 2 | Ufm1          |
| -0.482006907 | 0.000998911 | 7.48E-08 | 2 | Mbnl2         |
| -0.866214004 | 0.001050413 | 7.87E-08 | 2 | Zmynd15       |
| 1.065729077  | 0.001051334 | 7.87E-08 | 2 | Fez2          |
| 0.607273868  | 0.00109796  | 8.22E-08 | 2 | Kctd2         |
| -0.493358611 | 0.001145491 | 8.58E-08 | 2 | Tnfrsf1b      |
| 0.474055878  | 0.001215137 | 9.10E-08 | 2 | Zcchc6        |
| 0.624721584  | 0.001222414 | 9.16E-08 | 2 | Mapk14        |
| -0.91172179  | 0.001263507 | 9.46E-08 | 2 | Cdt1          |
| -0.446601532 | 0.001277736 | 9.57E-08 | 2 | Tcp1          |
| -0.408539424 | 0.001287267 | 9.64E-08 | 2 | 1110007C09Rik |
| -0.531331818 | 0.001302884 | 9.76E-08 | 2 | Syt11         |
| -0.535738413 | 0.001307296 | 9.79E-08 | 2 | Aurkaip1      |
| -0.405873432 | 0.001321849 | 9.90E-08 | 2 | Tnfrsf12a     |
| -0.452180228 | 0.001389583 | 1.04E-07 | 2 | Ndufa1        |
| -0.561582869 | 0.001390945 | 1.04E-07 | 2 | Banf1         |
| 0.537734824  | 0.001391833 | 1.04E-07 | 2 | Tcf4          |
| -0.427421758 | 0.001392086 | 1.04E-07 | 2 | Cxcr4         |
| 0.742816493  | 0.00148246  | 1.11E-07 | 2 | Frmd4b        |
| -0.336208435 | 0.001483775 | 1.11E-07 | 2 | Ier3ip1       |
| -0.515326216 | 0.001485107 | 1.11E-07 | 2 | Mrps7         |
| -0.380234125 | 0.001490821 | 1.12E-07 | 2 | Eif5a         |
| -0.850499886 | 0.001558823 | 1.17E-07 | 2 | Asph          |
| 0.779958477  | 0.001609516 | 1.21E-07 | 2 | Slc28a2       |
| -0.87650165  | 0.001622766 | 1.22E-07 | 2 | Comtd1        |
| 0.842693122  | 0.001641091 | 1.23E-07 | 2 | B4galt6       |
| -0.687743765 | 0.001655437 | 1.24E-07 | 2 | AB124611      |
| -0.409340167 | 0.001673897 | 1.25E-07 | 2 | Epb4.1l2      |
| 0.76826776   | 0.001697315 | 1.27E-07 | 2 | Prkacb        |
| -0.452746327 | 0.001778664 | 1.33E-07 | 2 | Fam50a        |
| -0.55602163  | 0.001814368 | 1.36E-07 | 2 | Cnih4         |
| -0.973783416 | 0.001904068 | 1.43E-07 | 2 | Parvg         |

|              |             |          |   |               |
|--------------|-------------|----------|---|---------------|
| 0.983982576  | 0.001912265 | 1.43E-07 | 2 | Adrb2         |
| -0.325798379 | 0.001996873 | 1.50E-07 | 2 | Ptprc         |
| -0.335860227 | 0.002067794 | 1.55E-07 | 2 | Ube2d3        |
| -1.021689976 | 0.00221182  | 1.66E-07 | 2 | Angptl2       |
| -0.403766015 | 0.002254891 | 1.69E-07 | 2 | Actn4         |
| -0.869164938 | 0.002306411 | 1.73E-07 | 2 | Glrx          |
| 0.485520774  | 0.002324755 | 1.74E-07 | 2 | Rnf130        |
| -0.977961011 | 0.002377626 | 1.78E-07 | 2 | Rusc2         |
| -0.634633437 | 0.002397546 | 1.80E-07 | 2 | Dtnbp1        |
| -0.446476098 | 0.002628442 | 1.97E-07 | 2 | Slc35b1       |
| -0.68461995  | 0.002703893 | 2.03E-07 | 2 | Rgcc          |
| -0.58634365  | 0.002715986 | 2.03E-07 | 2 | Rab4b         |
| -0.704956122 | 0.002724263 | 2.04E-07 | 2 | Tuba4a        |
| -0.442008702 | 0.002748184 | 2.06E-07 | 2 | Rasgef1b      |
| 0.698658982  | 0.002791902 | 2.09E-07 | 2 | Hgsnat        |
| -0.467071913 | 0.002793495 | 2.09E-07 | 2 | Tmem251       |
| -0.463083008 | 0.002796531 | 2.09E-07 | 2 | Eepd1         |
| -0.423381949 | 0.002804985 | 2.10E-07 | 2 | Ckb           |
| -0.370738615 | 0.002821175 | 2.11E-07 | 2 | Ubxn4         |
| -0.947730537 | 0.002843833 | 2.13E-07 | 2 | Slc16a3       |
| -0.561963789 | 0.002926633 | 2.19E-07 | 2 | Lrrfip2       |
| -0.708484745 | 0.002953706 | 2.21E-07 | 2 | Tpm1          |
| -0.529451319 | 0.002996004 | 2.24E-07 | 2 | Mapkapk3      |
| -0.724262243 | 0.003073042 | 2.30E-07 | 2 | Wdr74         |
| -1.416330137 | 0.003181776 | 2.38E-07 | 2 | Chil3         |
| -0.428082358 | 0.003195736 | 2.39E-07 | 2 | Arpp19        |
| 0.308307522  | 0.003355995 | 2.51E-07 | 2 | Mt1           |
| -0.640800092 | 0.003413357 | 2.56E-07 | 2 | Cd300a        |
| 0.421667295  | 0.003416995 | 2.56E-07 | 2 | Rassf2        |
| -0.257138249 | 0.003454347 | 2.59E-07 | 2 | Gp49a         |
| -0.403834109 | 0.003486243 | 2.61E-07 | 2 | Dynlrb1       |
| 0.543810756  | 0.003518156 | 2.63E-07 | 2 | Nr3c1         |
| 0.269577218  | 0.00367946  | 2.76E-07 | 2 | Snx5          |
| -0.495363525 | 0.003717724 | 2.78E-07 | 2 | Fblim1        |
| -0.523131669 | 0.003760565 | 2.82E-07 | 2 | Psma6         |
| -0.498258994 | 0.003829335 | 2.87E-07 | 2 | Prkch         |
| -0.453109362 | 0.004022431 | 3.01E-07 | 2 | Azin1         |
| -0.52099994  | 0.004055493 | 3.04E-07 | 2 | Kdm6b         |
| -0.998465482 | 0.004090475 | 3.06E-07 | 2 | Snrnp25       |
| -0.410322348 | 0.004161243 | 3.12E-07 | 2 | Hexb          |
| -0.856311108 | 0.004331812 | 3.24E-07 | 2 | Ercc6         |
| -0.344861626 | 0.004344489 | 3.25E-07 | 2 | Flna          |
| -1.188652306 | 0.004355668 | 3.26E-07 | 2 | Flrt3         |
| -0.291860799 | 0.004414427 | 3.31E-07 | 2 | Spty2d1       |
| -0.835423661 | 0.00451337  | 3.38E-07 | 2 | Bzw2          |
| -0.580994742 | 0.004521812 | 3.39E-07 | 2 | Senp2         |
| -0.34611589  | 0.004556717 | 3.41E-07 | 2 | Nfe2l2        |
| -1.317937254 | 0.004579605 | 3.43E-07 | 2 | Trem1         |
| -0.559223523 | 0.004666611 | 3.50E-07 | 2 | Rel           |
| -0.557989521 | 0.00473968  | 3.55E-07 | 2 | Pdcd6         |
| 0.42642737   | 0.004975183 | 3.73E-07 | 2 | Lyz1          |
| -0.286389109 | 0.005005784 | 3.75E-07 | 2 | Slc25a3       |
| -0.366663327 | 0.005212729 | 3.90E-07 | 2 | Trem2         |
| -0.3576092   | 0.005227035 | 3.91E-07 | 2 | Cct6a         |
| -0.740914897 | 0.00543192  | 4.07E-07 | 2 | D17Wsu104e    |
| -0.846140034 | 0.005553044 | 4.16E-07 | 2 | Lyst          |
| -0.762256201 | 0.005573499 | 4.17E-07 | 2 | Sik3          |
| -0.525561958 | 0.005788983 | 4.34E-07 | 2 | 3110043O21Rik |
| 0.671551166  | 0.00586918  | 4.40E-07 | 2 | Eps8          |
| 0.487582691  | 0.005908472 | 4.43E-07 | 2 | Cysltr1       |
| -0.391199748 | 0.005950232 | 4.46E-07 | 2 | Sifn2         |

|              |             |          |   |               |
|--------------|-------------|----------|---|---------------|
| 1.103098901  | 0.006040749 | 4.52E-07 | 2 | Ang           |
| -0.466062684 | 0.006054736 | 4.53E-07 | 2 | 2010107E04Rik |
| -1.314520612 | 0.006439786 | 4.82E-07 | 2 | P2ry10        |
| -0.373003697 | 0.006459484 | 4.84E-07 | 2 | Rabgef1       |
| 0.484618224  | 0.006608828 | 4.95E-07 | 2 | Prcp          |
| -0.953557565 | 0.007011324 | 5.25E-07 | 2 | Spn           |
| -0.30987744  | 0.007724327 | 5.79E-07 | 2 | Cd14          |
| -0.389473324 | 0.007860043 | 5.89E-07 | 2 | 5730416F02Rik |
| -0.568538012 | 0.00799521  | 5.99E-07 | 2 | Pkib          |
| 0.558506902  | 0.008082759 | 6.05E-07 | 2 | Sh3gl1        |
| -0.472571271 | 0.008186385 | 6.13E-07 | 2 | Atp6v1d       |
| 0.403557815  | 0.008194754 | 6.14E-07 | 2 | St3gal6       |
| -0.536784542 | 0.008270422 | 6.19E-07 | 2 | Ptprs         |
| -0.528047903 | 0.008364311 | 6.26E-07 | 2 | Lmo4          |
| -0.886780664 | 0.008684821 | 6.50E-07 | 2 | Creld2        |
| -0.535009304 | 0.008950697 | 6.70E-07 | 2 | Pak1ip1       |
| -0.644452905 | 0.009024576 | 6.76E-07 | 2 | Por           |
| 0.618658691  | 0.009195333 | 6.89E-07 | 2 | Pml           |
| 0.615141239  | 0.009428361 | 7.06E-07 | 2 | Rcsd1         |
| -0.489055174 | 0.009499635 | 7.11E-07 | 2 | Map4k3        |
| -0.804699691 | 0.009563329 | 7.16E-07 | 2 | Atp2b4        |
| -0.57147045  | 0.009838595 | 7.37E-07 | 2 | Ckap4         |
| -0.424653418 | 0.009845097 | 7.37E-07 | 2 | Ndufs2        |
| 0.514229827  | 0.00985887  | 7.38E-07 | 2 | Ifitm6        |
| -0.435720358 | 0.009888037 | 7.41E-07 | 2 | Rftn1         |
| -0.418422899 | 0.010051393 | 7.53E-07 | 2 | Smim14        |
| -1.125541084 | 0.010458546 | 7.83E-07 | 2 | Cd24a         |
| -0.377975222 | 0.010698082 | 8.01E-07 | 2 | Rexo2         |
| -0.417423087 | 0.010916512 | 8.18E-07 | 2 | Ifngr2        |
| 0.391276217  | 0.011015808 | 8.25E-07 | 2 | Hlx           |
| -0.451342667 | 0.011410205 | 8.55E-07 | 2 | Irak2         |
| -1.343918135 | 0.011601721 | 8.69E-07 | 2 | Plac8         |
| 1.018615309  | 0.01168585  | 8.75E-07 | 2 | Gpx3          |
| 1.084141876  | 0.011793562 | 8.83E-07 | 2 | Pbx3          |
| -0.527220615 | 0.011966159 | 8.96E-07 | 2 | Hnrnp1l       |
| -0.507671431 | 0.012148909 | 9.10E-07 | 2 | Glt25d1       |
| -0.792119046 | 0.012398049 | 9.29E-07 | 2 | Itga6         |
| -1.425181874 | 0.013388454 | 1.00E-06 | 2 | Nkg7          |
| -0.456023374 | 0.013495627 | 1.01E-06 | 2 | Mdh2          |
| 0.706705759  | 0.013517762 | 1.01E-06 | 2 | Nfix          |
| -0.57625709  | 0.013616779 | 1.02E-06 | 2 | Tmem147       |
| -0.497154837 | 0.014365533 | 1.08E-06 | 2 | Galns         |
| 0.597367324  | 0.014614977 | 1.09E-06 | 2 | Tbc1d9b       |
| -0.407126645 | 0.01503836  | 1.13E-06 | 2 | Emp1          |
| 0.581631322  | 0.01568336  | 1.17E-06 | 2 | Ecm1          |
| -0.989072838 | 0.016426601 | 1.23E-06 | 2 | Slc39a11      |
| -0.714538241 | 0.016529494 | 1.24E-06 | 2 | Ptpn22        |
| 0.564318718  | 0.016683053 | 1.25E-06 | 2 | Apobec3       |
| -0.80221947  | 0.016717331 | 1.25E-06 | 2 | Abhd5         |
| -0.442072934 | 0.017091118 | 1.28E-06 | 2 | Tank          |
| 0.652243957  | 0.01826154  | 1.37E-06 | 2 | Gm1966        |
| -0.687363511 | 0.018389693 | 1.38E-06 | 2 | Odc1          |
| -0.467027406 | 0.019212823 | 1.44E-06 | 2 | Psmd14        |
| 0.596044743  | 0.019458842 | 1.46E-06 | 2 | Ccr5          |
| -0.495180503 | 0.019459907 | 1.46E-06 | 2 | Sh3pxd2b      |
| -0.574881092 | 0.019707227 | 1.48E-06 | 2 | Map4k4        |
| 0.321004604  | 0.020098619 | 1.51E-06 | 2 | Fos           |
| 0.780857372  | 0.021086797 | 1.58E-06 | 2 | Ctsf          |
| -0.371575215 | 0.02153086  | 1.61E-06 | 2 | Chchd1        |
| 0.553088784  | 0.022356218 | 1.67E-06 | 2 | Ap2m1         |
| -0.724875729 | 0.022856045 | 1.71E-06 | 2 | Fnbp4         |

|              |             |          |   |           |
|--------------|-------------|----------|---|-----------|
| -0.410184595 | 0.022985342 | 1.72E-06 | 2 | Pin1      |
| 0.605868539  | 0.023713363 | 1.78E-06 | 2 | Zfp90     |
| -0.425342426 | 0.024008277 | 1.80E-06 | 2 | Scamp3    |
| 0.377639406  | 0.024378641 | 1.83E-06 | 2 | Aplp2     |
| -0.398797063 | 0.024572785 | 1.84E-06 | 2 | Aup1      |
| -0.644188603 | 0.024658624 | 1.85E-06 | 2 | Amz1      |
| -0.323831013 | 0.025063827 | 1.88E-06 | 2 | Dap       |
| -0.832094924 | 0.025824663 | 1.93E-06 | 2 | Wdfy1     |
| -0.521316674 | 0.026134267 | 1.96E-06 | 2 | Eif1ad    |
| -0.514792745 | 0.026210634 | 1.96E-06 | 2 | Slc37a2   |
| -0.674290337 | 0.026267963 | 1.97E-06 | 2 | Endod1    |
| -0.299341885 | 0.026273637 | 1.97E-06 | 2 | M6pr      |
| -0.78385207  | 0.027260638 | 2.04E-06 | 2 | Trpv2     |
| -0.501106963 | 0.027825167 | 2.08E-06 | 2 | Sugt1     |
| -0.501482647 | 0.028942712 | 2.17E-06 | 2 | Eif2s1    |
| -0.776660037 | 0.029051427 | 2.18E-06 | 2 | Jak2      |
| -0.335621079 | 0.02909563  | 2.18E-06 | 2 | Atp5b     |
| -0.362099783 | 0.029656755 | 2.22E-06 | 2 | Fis1      |
| -0.267288425 | 0.029834096 | 2.23E-06 | 2 | Atp6v0b   |
| 0.567579448  | 0.030280927 | 2.27E-06 | 2 | Srgap2    |
| -0.257400348 | 0.03062208  | 2.29E-06 | 2 | Pnpla2    |
| -0.274134191 | 0.031224867 | 2.34E-06 | 2 | Uqcr10    |
| -0.531663768 | 0.031423387 | 2.35E-06 | 2 | Ece2      |
| -0.637658528 | 0.03160733  | 2.37E-06 | 2 | Fuca2     |
| 1.136161642  | 0.031882422 | 2.39E-06 | 2 | Nxpe5     |
| -0.60631089  | 0.032123841 | 2.41E-06 | 2 | Mak16     |
| -0.805888014 | 0.032486611 | 2.43E-06 | 2 | Cyp4f18   |
| -0.616059386 | 0.032621682 | 2.44E-06 | 2 | Cirh1a    |
| -0.566528942 | 0.032790331 | 2.46E-06 | 2 | Eed       |
| -0.409296297 | 0.033404474 | 2.50E-06 | 2 | Timm13    |
| -0.328527188 | 0.034603304 | 2.59E-06 | 2 | Abca1     |
| -1.071662058 | 0.03471634  | 2.60E-06 | 2 | Itgb7     |
| -0.799319529 | 0.035095478 | 2.63E-06 | 2 | Ripk3     |
| -0.810692237 | 0.03518674  | 2.64E-06 | 2 | Adrbk2    |
| -0.814456498 | 0.035284158 | 2.64E-06 | 2 | Trp53inp2 |
| -0.450864692 | 0.035521643 | 2.66E-06 | 2 | Gng10     |
| -0.472673776 | 0.035750036 | 2.68E-06 | 2 | Dctn4     |
| -0.506230339 | 0.03575974  | 2.68E-06 | 2 | Dctn3     |
| -0.548918868 | 0.037358467 | 2.80E-06 | 2 | Ict1      |
| -0.427884823 | 0.037479104 | 2.81E-06 | 2 | Cd97      |
| -0.489616054 | 0.038708914 | 2.90E-06 | 2 | Pttg1     |
| -0.743563181 | 0.038732568 | 2.90E-06 | 2 | Thbs1     |
| -0.281414547 | 0.039140528 | 2.93E-06 | 2 | Ndufa8    |
| 0.424326032  | 0.039182606 | 2.93E-06 | 2 | Inpp4a    |
| -0.420900842 | 0.0401434   | 3.01E-06 | 2 | Rab6a     |
| 0.483834485  | 0.04072202  | 3.05E-06 | 2 | Arhgef3   |
| -0.530351456 | 0.040815805 | 3.06E-06 | 2 | Gtpbp4    |
| -0.578535569 | 0.041740816 | 3.13E-06 | 2 | Plcg2     |
| -0.839859725 | 0.042556481 | 3.19E-06 | 2 | Inf2      |
| 0.422302466  | 0.042563157 | 3.19E-06 | 2 | Zfhx3     |
| -0.853500748 | 0.04368839  | 3.27E-06 | 2 | Sntb2     |
| 0.604974137  | 0.043773694 | 3.28E-06 | 2 | Ppp1r21   |
| -0.696344953 | 0.044341313 | 3.32E-06 | 2 | Pqlc3     |
| -0.405754616 | 0.047550562 | 3.56E-06 | 2 | Cd84      |
| -0.682364869 | 0.048406969 | 3.63E-06 | 2 | Utp18     |
| -0.506842443 | 0.049034568 | 3.67E-06 | 2 | Mob4      |
| -0.83803279  | 0.05009589  | 3.75E-06 | 2 | Ifitm1    |
| -0.648220997 | 0.050903418 | 3.81E-06 | 2 | Srxn1     |
| 0.855262624  | 0.052223364 | 3.91E-06 | 2 | Dusp7     |
| -0.443801764 | 0.054965606 | 4.12E-06 | 2 | Rhoc      |
| -0.554294257 | 0.060755795 | 4.55E-06 | 2 | Arih2     |

|              |             |          |   |               |
|--------------|-------------|----------|---|---------------|
| -0.449160518 | 0.062773166 | 4.70E-06 | 2 | Gch1          |
| -0.9195327   | 0.063022706 | 4.72E-06 | 2 | Aim1          |
| -0.897498126 | 0.065217824 | 4.88E-06 | 2 | 1810011H11Rik |
| -0.32729963  | 0.066244934 | 4.96E-06 | 2 | Fnip1         |
| -0.576041236 | 0.066698617 | 5.00E-06 | 2 | Hsd3b7        |
| -0.609872835 | 0.067707385 | 5.07E-06 | 2 | Cd276         |
| -1.008518306 | 0.067961288 | 5.09E-06 | 2 | Slc2a6        |
| 0.610907543  | 0.069488156 | 5.20E-06 | 2 | Ifi203        |
| -0.312196495 | 0.069799318 | 5.23E-06 | 2 | Rnasek        |
| -0.343575917 | 0.070236883 | 5.26E-06 | 2 | Tmem206       |
| -0.443525633 | 0.072002218 | 5.39E-06 | 2 | Chd7          |
| -0.496873646 | 0.072618575 | 5.44E-06 | 2 | Tbc1d15       |
| 0.66103787   | 0.07595699  | 5.69E-06 | 2 | Pid1          |
| -0.390512954 | 0.076624262 | 5.74E-06 | 2 | Etv3          |
| -0.341946468 | 0.078177487 | 5.86E-06 | 2 | Nedd8         |
| -0.634820885 | 0.078420095 | 5.87E-06 | 2 | Smox          |
| -0.355032733 | 0.079500014 | 5.95E-06 | 2 | Alas1         |
| -0.359397607 | 0.079996024 | 5.99E-06 | 2 | Dusp11        |
| 0.727175326  | 0.080474074 | 6.03E-06 | 2 | Pikfyve       |
| -0.405571659 | 0.08085428  | 6.06E-06 | 2 | Yif1b         |
| -0.479327315 | 0.080866826 | 6.06E-06 | 2 | Acer3         |
| -1.340114296 | 0.083685539 | 6.27E-06 | 2 | Nes           |
| -0.375941662 | 0.087649205 | 6.56E-06 | 2 | Btg1          |
| -0.595911945 | 0.091450301 | 6.85E-06 | 2 | Rcbtb2        |
| -1.393467102 | 0.091894329 | 6.88E-06 | 2 | Ccr7          |
| -0.438015189 | 0.091984734 | 6.89E-06 | 2 | H13           |
| -0.271923536 | 0.09201017  | 6.89E-06 | 2 | 1700017B05Rik |
| -0.508478774 | 0.092027106 | 6.89E-06 | 2 | Myof          |
| 0.358161955  | 0.092158714 | 6.90E-06 | 2 | Aif1          |
| -0.455688077 | 0.093468365 | 7.00E-06 | 2 | Zak           |
| 0.422120092  | 0.095594509 | 7.16E-06 | 2 | Btg2          |
| -0.377243502 | 0.096549929 | 7.23E-06 | 2 | Ist1          |
| -0.416039534 | 0.098055151 | 7.34E-06 | 2 | Rheb          |
| -0.499621986 | 0.098059183 | 7.34E-06 | 2 | Tlr2          |
| -0.272229953 | 0.100582069 | 7.53E-06 | 2 | Atp6v1e1      |
| 0.896772471  | 0.101375343 | 7.59E-06 | 2 | Slc25a37      |
| -0.914590791 | 0.101490312 | 7.60E-06 | 2 | Pik3cb        |
| -0.532067493 | 0.10173745  | 7.62E-06 | 2 | Rbm7          |
| -0.401846863 | 0.10401124  | 7.79E-06 | 2 | Plgrkt        |
| 0.746890603  | 0.10618408  | 7.95E-06 | 2 | Hps3          |
| -0.478113113 | 0.109020172 | 8.17E-06 | 2 | Tomm70a       |
| -0.320499314 | 0.109672467 | 8.21E-06 | 2 | Commdd4       |
| 0.625882893  | 0.109942957 | 8.23E-06 | 2 | Tubgcp5       |
| 0.633251692  | 0.117839455 | 8.83E-06 | 2 | Kbtbd11       |
| -0.390423523 | 0.119382825 | 8.94E-06 | 2 | Rpsa          |
| -0.557974666 | 0.119927661 | 8.98E-06 | 2 | Gnl3          |
| 0.607878889  | 0.123718591 | 9.27E-06 | 2 | Mat2a         |
| -0.388062853 | 0.124848918 | 9.35E-06 | 2 | Dtx4          |
| -0.693774931 | 0.126314164 | 9.46E-06 | 2 | Srpkl         |
| -0.458704108 | 0.127267999 | 9.53E-06 | 2 | Tmbim4        |
| -0.831395632 | 0.12997902  | 9.73E-06 | 2 | Ubr4          |
| -0.542412958 | 0.130374996 | 9.76E-06 | 2 | Atp7a         |
| -0.345417231 | 0.131651216 | 9.86E-06 | 2 | Eif3h         |
| -0.435209546 | 0.134849704 | 1.01E-05 | 2 | Slc27a1       |
| -0.361591953 | 0.135360768 | 1.01E-05 | 2 | Hint2         |
| -0.407410824 | 0.136044263 | 1.02E-05 | 2 | Bax           |
| -0.907977971 | 0.139567517 | 1.05E-05 | 2 | Mthfd2        |
| 0.343848435  | 0.14271452  | 1.07E-05 | 2 | Epsti1        |
| -0.496290563 | 0.144002848 | 1.08E-05 | 2 | Icam1         |
| -0.491889222 | 0.145490164 | 1.09E-05 | 2 | Dap3          |
| -0.363210492 | 0.147193528 | 1.10E-05 | 2 | Macf1         |

|              |             |          |   |          |
|--------------|-------------|----------|---|----------|
| -0.519059491 | 0.151758294 | 1.14E-05 | 2 | Cav2     |
| -0.512702854 | 0.157340849 | 1.18E-05 | 2 | Hsd17b10 |
| -0.381932622 | 0.163306357 | 1.22E-05 | 2 | Cmip     |
| -0.323326216 | 0.167573591 | 1.26E-05 | 2 | Npm1     |
| -0.385326499 | 0.168059703 | 1.26E-05 | 2 | Galnt7   |
| -0.389852889 | 0.168358397 | 1.26E-05 | 2 | Hmgn5    |
| -0.299162159 | 0.169044918 | 1.27E-05 | 2 | Wdr1     |
| -0.384003409 | 0.174139069 | 1.30E-05 | 2 | Scarb2   |
| -0.344931397 | 0.187439821 | 1.40E-05 | 2 | Eif6     |
| -0.353953454 | 0.187900825 | 1.41E-05 | 2 | Usp14    |
| -0.510614948 | 0.189204906 | 1.42E-05 | 2 | Mark3    |
| -0.315916468 | 0.190975713 | 1.43E-05 | 2 | Baiap2   |
| -0.507996644 | 0.193263143 | 1.45E-05 | 2 | Fem1b    |
| -1.129084023 | 0.194339508 | 1.46E-05 | 2 | Pcp4l1   |
| -0.318381249 | 0.194451275 | 1.46E-05 | 2 | Hn1      |
| -0.37645764  | 0.199823282 | 1.50E-05 | 2 | Vapa     |
| -0.347495905 | 0.199875276 | 1.50E-05 | 2 | Polr1d   |
| -0.556402652 | 0.201182602 | 1.51E-05 | 2 | Brpf1    |
| -0.567306988 | 0.206343292 | 1.55E-05 | 2 | Ppfibp1  |
| -0.335371944 | 0.208108255 | 1.56E-05 | 2 | Serbp1   |
| -0.399681031 | 0.210996845 | 1.58E-05 | 2 | Cenpa    |
| -0.567507328 | 0.21772948  | 1.63E-05 | 2 | Enoph1   |
| -0.423846037 | 0.2186071   | 1.64E-05 | 2 | Mdfic    |
| 0.411527265  | 0.223455303 | 1.67E-05 | 2 | Lmo2     |
| -0.447297106 | 0.226537463 | 1.70E-05 | 2 | Zmat5    |
| -0.363749473 | 0.231574931 | 1.73E-05 | 2 | Ndufb8   |
| -0.297325578 | 0.233170482 | 1.75E-05 | 2 | Zfp207   |
| -0.407454729 | 0.237167343 | 1.78E-05 | 2 | Rpl18a   |
| -0.522419168 | 0.2491358   | 1.87E-05 | 2 | Prnp     |
| -0.258145253 | 0.258838367 | 1.94E-05 | 2 | Srp19    |
| -0.264284847 | 0.263380949 | 1.97E-05 | 2 | Itgb1    |
| 0.254481676  | 0.263574584 | 1.97E-05 | 2 | App      |
| 0.39646492   | 0.269442851 | 2.02E-05 | 2 | Irf2bp2  |
| -0.935269858 | 0.271936898 | 2.04E-05 | 2 | Ly6c2    |
| -0.305761399 | 0.272297493 | 2.04E-05 | 2 | Ube2h    |
| -0.443729571 | 0.272799477 | 2.04E-05 | 2 | Tmem134  |
| -0.343917708 | 0.273735084 | 2.05E-05 | 2 | Cds2     |
| 0.432285667  | 0.275160171 | 2.06E-05 | 2 | Adrbk1   |
| 0.371455604  | 0.280870587 | 2.10E-05 | 2 | Idh1     |
| -0.519133744 | 0.288687421 | 2.16E-05 | 2 | Mrpl35   |
| -0.675667098 | 0.289059864 | 2.16E-05 | 2 | Sowahc   |
| 0.450883849  | 0.292131176 | 2.19E-05 | 2 | Vrk2     |
| -0.324110502 | 0.2922926   | 2.19E-05 | 2 | Arl8b    |
| -0.474688397 | 0.296090924 | 2.22E-05 | 2 | Fbxo6    |
| -1.286322511 | 0.299388112 | 2.24E-05 | 2 | H2-Oa    |
| -0.290452847 | 0.300145392 | 2.25E-05 | 2 | Atp5c1   |
| -0.378820125 | 0.300744035 | 2.25E-05 | 2 | Atp6v0d1 |
| -0.447774159 | 0.301819374 | 2.26E-05 | 2 | Gtf2b    |
| -0.83662719  | 0.302937646 | 2.27E-05 | 2 | Arap2    |
| 0.918350695  | 0.307698659 | 2.30E-05 | 2 | Kitl     |
| -0.254608874 | 0.312580115 | 2.34E-05 | 2 | Ola1     |
| -0.378087804 | 0.315022865 | 2.36E-05 | 2 | Hcfc1r1  |
| -0.38340213  | 0.316887301 | 2.37E-05 | 2 | Txn1     |
| 0.580968313  | 0.31961122  | 2.39E-05 | 2 | Rnf150   |
| 0.513284114  | 0.323377442 | 2.42E-05 | 2 | Cd36     |
| 0.67735612   | 0.323632427 | 2.42E-05 | 2 | Mtus1    |
| -0.475227515 | 0.329076041 | 2.46E-05 | 2 | Nop58    |
| -0.378076304 | 0.329288164 | 2.47E-05 | 2 | C1qbp    |
| -0.269087664 | 0.334993101 | 2.51E-05 | 2 | Tubb4b   |
| 0.461105349  | 0.33642498  | 2.52E-05 | 2 | Rbpj     |
| -0.730121156 | 0.33805101  | 2.53E-05 | 2 | Slc35c2  |

|              |             |          |   |               |
|--------------|-------------|----------|---|---------------|
| -0.378845735 | 0.338156948 | 2.53E-05 | 2 | Cct2          |
| 0.679754695  | 0.340906834 | 2.55E-05 | 2 | Nuak1         |
| -0.258733406 | 0.343014081 | 2.57E-05 | 2 | Eif4g2        |
| -0.512304526 | 0.343608911 | 2.57E-05 | 2 | Hck           |
| -0.754729186 | 0.349726631 | 2.62E-05 | 2 | Phlpp1        |
| -0.40226415  | 0.349814948 | 2.62E-05 | 2 | Snrpd3        |
| -0.325376672 | 0.350059046 | 2.62E-05 | 2 | Rnf19b        |
| -0.682620901 | 0.355821758 | 2.66E-05 | 2 | Mrpl38        |
| -0.507141683 | 0.357692591 | 2.68E-05 | 2 | Lactb         |
| 0.410566662  | 0.360414559 | 2.70E-05 | 2 | Laptm4a       |
| -0.426187631 | 0.366553637 | 2.75E-05 | 2 | Rsl1d1        |
| -0.345428803 | 0.366561587 | 2.75E-05 | 2 | Riok3         |
| -0.40049591  | 0.370487708 | 2.77E-05 | 2 | Lsm3          |
| -0.593143595 | 0.378085332 | 2.83E-05 | 2 | Ppa1          |
| -0.356998206 | 0.381476792 | 2.86E-05 | 2 | Eny2          |
| 0.692263     | 0.384898184 | 2.88E-05 | 2 | S1pr1         |
| 0.550043013  | 0.389122704 | 2.91E-05 | 2 | Arhgef6       |
| 0.70843375   | 0.389651725 | 2.92E-05 | 2 | Cd38          |
| -0.658199612 | 0.392317245 | 2.94E-05 | 2 | Fem1c         |
| -0.863090795 | 0.39348271  | 2.95E-05 | 2 | Coro2a        |
| -0.379376028 | 0.397741858 | 2.98E-05 | 2 | Igsf8         |
| -0.586389558 | 0.410205263 | 3.07E-05 | 2 | Ak6           |
| -0.296396856 | 0.416472374 | 3.12E-05 | 2 | Ppp1ca        |
| -0.449397543 | 0.416895588 | 3.12E-05 | 2 | H2-DMb1       |
| 0.298433455  | 0.418061927 | 3.13E-05 | 2 | Rsad2         |
| -0.291679808 | 0.420342584 | 3.15E-05 | 2 | Cox7a2        |
| -0.540210674 | 0.420917688 | 3.15E-05 | 2 | Jdp2          |
| -0.618897613 | 0.422128253 | 3.16E-05 | 2 | Gatad2a       |
| -0.900057743 | 0.425603795 | 3.19E-05 | 2 | Nr1h3         |
| -0.33381166  | 0.428402182 | 3.21E-05 | 2 | Ndufv2        |
| -0.301358117 | 0.447733809 | 3.35E-05 | 2 | Mdh1          |
| -0.385234558 | 0.464551952 | 3.48E-05 | 2 | Anxa7         |
| -0.448703776 | 0.465240526 | 3.48E-05 | 2 | Ccni          |
| 0.929184819  | 0.470897178 | 3.53E-05 | 2 | Maged1        |
| 0.572890725  | 0.474936559 | 3.56E-05 | 2 | Irf2          |
| -0.371432388 | 0.475458568 | 3.56E-05 | 2 | Nup50         |
| -0.477003396 | 0.476645424 | 3.57E-05 | 2 | Usmg5         |
| 0.297477168  | 0.479036213 | 3.59E-05 | 2 | 4632428N05Rik |
| -0.60292489  | 0.482772679 | 3.62E-05 | 2 | Socs6         |
| -0.794533337 | 0.496491053 | 3.72E-05 | 2 | Gpr171        |
| -0.526474843 | 0.497957764 | 3.73E-05 | 2 | Gm11974       |
| -0.423737452 | 0.498834379 | 3.74E-05 | 2 | Gtf2h5        |
| -0.340758604 | 0.506781111 | 3.80E-05 | 2 | Mrps14        |
| -0.4373918   | 0.51086339  | 3.83E-05 | 2 | Otulin        |
| -0.549081535 | 0.511831349 | 3.83E-05 | 2 | Cetn2         |
| -0.390385758 | 0.532454062 | 3.99E-05 | 2 | Cyp4v3        |
| 0.33113387   | 0.534746369 | 4.00E-05 | 2 | Zeb2          |
| 0.654568584  | 0.540461531 | 4.05E-05 | 2 | Ptprj         |
| -0.326066564 | 0.540759113 | 4.05E-05 | 2 | Zmiz2         |
| -0.251290425 | 0.559735861 | 4.19E-05 | 2 | Rabggtb       |
| -0.402013618 | 0.582151156 | 4.36E-05 | 2 | Dnase1l1      |
| -0.268794045 | 0.596420489 | 4.47E-05 | 2 | Cct4          |
| -0.347139026 | 0.601928792 | 4.51E-05 | 2 | Vps26a        |
| -0.403890253 | 0.609480465 | 4.56E-05 | 2 | Slc35e4       |
| -0.451731299 | 0.626922615 | 4.70E-05 | 2 | Frrs1         |
| -1.133526047 | 0.629271934 | 4.71E-05 | 2 | Gdf3          |
| -0.537920886 | 0.630372013 | 4.72E-05 | 2 | Eif4e2        |
| 0.477247829  | 0.630474905 | 4.72E-05 | 2 | Fli1          |
| -0.566989765 | 0.636079747 | 4.76E-05 | 2 | Ccrn4l        |
| -0.559482682 | 0.640212067 | 4.79E-05 | 2 | Atp11b        |
| -0.443262136 | 0.643847522 | 4.82E-05 | 2 | Ube2k         |



|                    |                    |                 |          |              |        |
|--------------------|--------------------|-----------------|----------|--------------|--------|
| -0.514536638       | 0.652760655        | 4.89E-05        | 2        | BC028528     |        |
| -0.36886098        | 0.656839904        | 4.92E-05        | 2        | Ptpmt1       |        |
| -0.673199889       | 0.683392314        | 5.12E-05        | 2        | Nostrin      |        |
| -0.696313901       | 0.687870804        | 5.15E-05        | 2        | Lmf1         |        |
| -0.602984503       | 0.705546019        | 5.28E-05        | 2        | Plaa         |        |
| -0.52807367        | 0.707767451        | 5.30E-05        | 2        | Zc3h12a      |        |
| -0.277761151       | 0.711417689        | 5.33E-05        | 2        | Ugp2         |        |
| -0.749653712       | 0.713062846        | 5.34E-05        | 2        | Mbp          |        |
| -0.310381512       | 0.725327676        | 5.43E-05        | 2        | Hspa9        |        |
| -0.448987653       | 0.733276187        | 5.49E-05        | 2        | Gtf2f2       |        |
| -0.612443923       | 0.751650584        | 5.63E-05        | 2        | Lsm1         |        |
| -0.964515459       | 0.752475621        | 5.64E-05        | 2        |              | Sep.06 |
| -0.268006744       | 0.758474734        | 5.68E-05        | 2        | Mex3c        |        |
| -0.93964511        | 0.764003149        | 5.72E-05        | 2        | Sorl1        |        |
| -0.512200506       | 0.77895779         | 5.83E-05        | 2        | Rasa2        |        |
| -0.273601455       | 0.780247701        | 5.84E-05        | 2        | Selk         |        |
| -0.416680207       | 0.780571095        | 5.85E-05        | 2        | Ccdc23       |        |
| -0.984671506       | 0.794454134        | 5.95E-05        | 2        | Itgal        |        |
| -0.670224711       | 0.842650424        | 6.31E-05        | 2        | Snx20        |        |
| -0.684384318       | 0.864901529        | 6.48E-05        | 2        | Pip5k1a      |        |
| -0.297573656       | 0.867439915        | 6.50E-05        | 2        | Zfp326       |        |
| 0.905801057        | 0.882165633        | 6.61E-05        | 2        | Rnf169       |        |
| 0.85355152         | 0.923034525        | 6.91E-05        | 2        | Evi5         |        |
| -0.349335904       | 0.923960598        | 6.92E-05        | 2        | Tmem14c      |        |
| -0.290675103       | 0.925346403        | 6.93E-05        | 2        | Ube2f        |        |
| 0.493627673        | 0.927736611        | 6.95E-05        | 2        | Rnf145       |        |
| 0.395134743        | 0.930666892        | 6.97E-05        | 2        | Rnf167       |        |
| 0.421758247        | 0.93228297         | 6.98E-05        | 2        | Nfia         |        |
| -0.334748878       | 0.937827456        | 7.02E-05        | 2        | Ghitm        |        |
| 0.709565099        | 0.943393919        | 7.07E-05        | 2        | Dalrd3       |        |
| -0.411152151       | 0.947970308        | 7.10E-05        | 2        | Prpf38a      |        |
| 0.281312246        | 0.952143799        | 7.13E-05        | 2        | Ms4a6c       |        |
| <b>0.571870252</b> | <b>0.978300756</b> | <b>7.33E-05</b> | <b>2</b> | <b>Fcgr1</b> |        |
| -0.32574505        | 0.988436808        | 7.40E-05        | 2        | Tmem208      |        |
| 0.611036385        | 0.994134283        | 7.45E-05        | 2        | Nfatc2       |        |
| -0.275588644       | 1                  | 7.54E-05        | 2        | Fndc3b       |        |
| -0.321602768       | 1                  | 7.55E-05        | 2        | Rpf1         |        |
| -0.371333615       | 1                  | 7.63E-05        | 2        | Psme2b       |        |
| -0.383623955       | 1                  | 7.65E-05        | 2        | Tmc6         |        |
| -0.273418548       | 1                  | 7.74E-05        | 2        | Uqcrh        |        |
| -0.374418007       | 1                  | 7.75E-05        | 2        | Psma2        |        |
| 0.397859243        | 1                  | 7.84E-05        | 2        | Il6ra        |        |
| -0.503600297       | 1                  | 7.93E-05        | 2        | Nsf          |        |
| -0.548314818       | 1                  | 8.06E-05        | 2        | Cpeb2        |        |
| -0.320198514       | 1                  | 8.14E-05        | 2        | Cope         |        |
| -0.333196618       | 1                  | 8.17E-05        | 2        | Mpc2         |        |
| -0.305477586       | 1                  | 8.18E-05        | 2        | Spcs2        |        |
| -0.440689758       | 1                  | 8.28E-05        | 2        | Htatip2      |        |
| -0.303955472       | 1                  | 8.43E-05        | 2        | Psme3        |        |
| 0.354219739        | 1                  | 8.43E-05        | 2        | Siglece      |        |
| -0.346482499       | 1                  | 8.52E-05        | 2        | Dnmt3a       |        |
| 0.555653256        | 1                  | 8.67E-05        | 2        | Fert2        |        |
| -0.357795491       | 1                  | 8.74E-05        | 2        | Dyrk1a       |        |
| -0.351052357       | 1                  | 8.88E-05        | 2        | Ilf2         |        |
| -0.25343417        | 1                  | 9.09E-05        | 2        | Jkamp        |        |
| -0.696648183       | 1                  | 9.09E-05        | 2        | Letm1        |        |
| 0.483635792        | 1                  | 9.19E-05        | 2        | Morc3        |        |
| -0.521393632       | 1                  | 9.20E-05        | 2        | Chchd4       |        |
| -0.331961209       | 1                  | 9.35E-05        | 2        | Atp5g3       |        |
| -0.392072902       | 1                  | 9.41E-05        | 2        | Ifi27        |        |

|              |   |           |   |               |
|--------------|---|-----------|---|---------------|
| -0.481672845 | 1 | 9.73E-05  | 2 | Gnptab        |
| -0.326650056 | 1 | 9.75E-05  | 2 | Dmxl2         |
| 0.521630116  | 1 | 9.83E-05  | 2 | Rassf4        |
| 0.479639206  | 1 | 9.89E-05  | 2 | Uba7          |
| -0.571082418 | 1 | 9.91E-05  | 2 | Glipr2        |
| -0.518741202 | 1 | 9.93E-05  | 2 | Chic2         |
| 0.467928247  | 1 | 0.0001008 | 2 | Samd9l        |
| -0.27158721  | 1 | 0.0001012 | 2 | Rab8a         |
| -0.403087939 | 1 | 0.0001019 | 2 | Rcan1         |
| -0.277774518 | 1 | 0.0001022 | 2 | Lpxn          |
| -0.612797155 | 1 | 0.0001026 | 2 | Rpl36a1       |
| -0.307582343 | 1 | 0.0001039 | 2 | Psmd12        |
| -0.403831425 | 1 | 0.0001064 | 2 | Cox19         |
| -0.411353657 | 1 | 0.0001067 | 2 | Ppp2cb        |
| 0.517188247  | 1 | 0.0001083 | 2 | Epb4.1l1      |
| -0.438331331 | 1 | 0.000111  | 2 | Emc3          |
| -0.886746024 | 1 | 0.0001116 | 2 | Dock5         |
| 0.410372985  | 1 | 0.0001119 | 2 | Ankfy1        |
| -0.496097854 | 1 | 0.0001121 | 2 | B4galnt1      |
| -0.500316945 | 1 | 0.0001122 | 2 | Paf1          |
| -0.674349273 | 1 | 0.000113  | 2 | Snhg6         |
| -0.285464163 | 1 | 0.0001138 | 2 | Prdx5         |
| 0.345590567  | 1 | 0.0001151 | 2 | Pou2f2        |
| -0.309330334 | 1 | 0.0001153 | 2 | Polr2i        |
| -0.330797049 | 1 | 0.0001163 | 2 | Stx8          |
| -0.316665105 | 1 | 0.000119  | 2 | Creg1         |
| 0.557818132  | 1 | 0.0001212 | 2 | Xdh           |
| 0.678862947  | 1 | 0.0001233 | 2 | Itfg3         |
| -0.598454586 | 1 | 0.0001248 | 2 | Ero1lb        |
| -0.286816238 | 1 | 0.0001252 | 2 | 1810058l24Rik |
| -0.372393853 | 1 | 0.0001254 | 2 | Elovl5        |
| -0.477990704 | 1 | 0.0001267 | 2 | Eif3l         |
| -0.549528463 | 1 | 0.0001287 | 2 | Srebfl        |
| 0.335092003  | 1 | 0.0001301 | 2 | Dhrs3         |
| -0.364909568 | 1 | 0.000131  | 2 | Sec61b        |
| 0.680185235  | 1 | 0.0001312 | 2 | Fchsd2        |
| -0.254605726 | 1 | 0.0001337 | 2 | Cox8a         |
| -0.483522744 | 1 | 0.0001352 | 2 | Esyt2         |
| 0.634901233  | 1 | 0.0001354 | 2 | Zfp217        |
| -0.322093658 | 1 | 0.0001359 | 2 | Ranbp2        |
| -0.261790041 | 1 | 0.0001361 | 2 | Gm12338       |
| 0.459080274  | 1 | 0.0001363 | 2 | Tlr4          |
| -0.290231857 | 1 | 0.0001374 | 2 | Ngdn          |
| 0.709605357  | 1 | 0.0001376 | 2 | Sh3bp5        |
| 0.656246234  | 1 | 0.0001377 | 2 | Pdgfc         |
| 0.668604257  | 1 | 0.0001398 | 2 | Fam111a       |
| -0.527031469 | 1 | 0.0001406 | 2 | Sec24b        |
| -0.339450843 | 1 | 0.0001425 | 2 | Mrps6         |
| -0.370786779 | 1 | 0.0001427 | 2 | Vdac1         |
| 0.858143666  | 1 | 0.0001429 | 2 | Agtrap        |
| -0.466224056 | 1 | 0.0001429 | 2 | Nfkbib        |
| -0.49503885  | 1 | 0.0001446 | 2 | 1110008P14Rik |
| -0.543612877 | 1 | 0.0001454 | 2 | Hivep1        |
| -0.283281319 | 1 | 0.0001465 | 2 | Smek2         |
| -0.48157831  | 1 | 0.0001472 | 2 | Snhg1         |
| -0.373237096 | 1 | 0.0001524 | 2 | Rps2          |
| -0.476670786 | 1 | 0.0001525 | 2 | Atp5g1        |
| 0.426354487  | 1 | 0.0001535 | 2 | Aftph         |
| -0.314680327 | 1 | 0.0001557 | 2 | Degs1         |
| 0.681837891  | 1 | 0.0001558 | 2 | Acat1         |
| -0.747966374 | 1 | 0.000156  | 2 | Osgin2        |

|              |   |           |   |               |
|--------------|---|-----------|---|---------------|
| 0.394328737  | 1 | 0.0001583 | 2 | Ddx26b        |
| -0.26427139  | 1 | 0.0001596 | 2 | Sec11a        |
| -0.572405391 | 1 | 0.0001607 | 2 | Atp6v0a2      |
| -0.435849542 | 1 | 0.0001621 | 2 | Apbb1ip       |
| -0.284763787 | 1 | 0.0001634 | 2 | Bcl3          |
| -0.589069218 | 1 | 0.0001699 | 2 | Rasa4         |
| -0.311334443 | 1 | 0.0001712 | 2 | Zfp715        |
| -0.286692121 | 1 | 0.0001723 | 2 | Ppp2r5c       |
| -0.437944641 | 1 | 0.0001743 | 2 | Zc3hav1       |
| -0.428911468 | 1 | 0.0001746 | 2 | Orc4          |
| -0.265408842 | 1 | 0.0001776 | 2 | Ndufa12       |
| -0.36540456  | 1 | 0.0001797 | 2 | Polr1c        |
| 0.916431666  | 1 | 0.0001802 | 2 | Rab24         |
| -0.450601507 | 1 | 0.000183  | 2 | Cops5         |
| -0.756548007 | 1 | 0.0001852 | 2 | Fmnl2         |
| -0.31296814  | 1 | 0.0001859 | 2 | Alg5          |
| -0.354749888 | 1 | 0.0001863 | 2 | Irf2bpl       |
| -0.362836065 | 1 | 0.0001867 | 2 | Cd300lb       |
| -0.632994014 | 1 | 0.0001915 | 2 | Mif           |
| -0.661976156 | 1 | 0.0001966 | 2 | Eva1b         |
| 0.621202388  | 1 | 0.0001972 | 2 | Apoe          |
| -0.334713    | 1 | 0.0002009 | 2 | Srrm1         |
| -0.539150049 | 1 | 0.0002036 | 2 | Sec23b        |
| -0.272553347 | 1 | 0.0002039 | 2 | Tusc2         |
| -0.296014096 | 1 | 0.0002041 | 2 | Spcs1         |
| -0.58946955  | 1 | 0.0002066 | 2 | Evl           |
| -0.30097248  | 1 | 0.0002114 | 2 | Tmem184b      |
| 0.653642341  | 1 | 0.0002157 | 2 | Tsc22d4       |
| -0.271330171 | 1 | 0.0002176 | 2 | Sf3b1         |
| -0.576857276 | 1 | 0.000218  | 2 | 2510009E07Rik |
| -0.445270253 | 1 | 0.0002211 | 2 | Diap1         |
| -0.769695585 | 1 | 0.0002284 | 2 | Abi3          |
| -0.377468268 | 1 | 0.000234  | 2 | Sub1          |
| -0.491587735 | 1 | 0.0002341 | 2 | Myl6          |
| -0.34691633  | 1 | 0.0002355 | 2 | Psmc1         |
| 0.574348449  | 1 | 0.0002369 | 2 | Sec14l1       |
| -0.458058939 | 1 | 0.0002375 | 2 | Gatad1        |
| -0.305680395 | 1 | 0.0002388 | 2 | Ndufb6        |
| 0.690372028  | 1 | 0.0002401 | 2 | Tk2           |
| -0.560705926 | 1 | 0.0002431 | 2 | Rin3          |
| -0.418606738 | 1 | 0.0002446 | 2 | Lonrf3        |
| -0.703823411 | 1 | 0.0002461 | 2 | Dgat1         |
| -0.281740269 | 1 | 0.0002478 | 2 | Tfg           |
| -0.295345183 | 1 | 0.0002505 | 2 | Atp6v1f       |
| -0.306731839 | 1 | 0.0002525 | 2 | Pdcl3         |
| -0.337555361 | 1 | 0.0002546 | 2 | 1110008F13Rik |
| -0.290631891 | 1 | 0.0002566 | 2 | Senp5         |
| -0.552207708 | 1 | 0.000259  | 2 | Spsb2         |
| -0.262650519 | 1 | 0.0002594 | 2 | Got2          |
| 0.55286734   | 1 | 0.0002674 | 2 | Osbpl9        |
| -0.448560495 | 1 | 0.0002675 | 2 | Exoc2         |
| -0.292076293 | 1 | 0.0002698 | 2 | Mphosph10     |
| -0.475742913 | 1 | 0.0002749 | 2 | Tceb3         |
| -0.352997141 | 1 | 0.0002766 | 2 | Cs            |
| -0.272800129 | 1 | 0.0002766 | 2 | Ech1          |
| -0.258120718 | 1 | 0.0002817 | 2 | Shfm1         |
| -0.335668546 | 1 | 0.0002838 | 2 | Naa50         |
| -0.334605655 | 1 | 0.0002845 | 2 | Atxn10        |
| -0.368080001 | 1 | 0.0002847 | 2 | Pgk1          |
| -0.27873564  | 1 | 0.0002915 | 2 | Pgls          |
| -0.430062103 | 1 | 0.000292  | 2 | Fam63a        |

|              |   |           |   |               |
|--------------|---|-----------|---|---------------|
| -0.588767436 | 1 | 0.000295  | 2 | Wbp1l         |
| -0.350125716 | 1 | 0.0002958 | 2 | Stk10         |
| 0.539485118  | 1 | 0.0002994 | 2 | Cd302         |
| -0.281283611 | 1 | 0.0003018 | 2 | Apobec1       |
| -0.673575867 | 1 | 0.0003019 | 2 | Nxt1          |
| -0.476382577 | 1 | 0.0003044 | 2 | Snrpa1        |
| -0.380886423 | 1 | 0.0003085 | 2 | Mrps28        |
| -0.310080485 | 1 | 0.0003087 | 2 | Irf5          |
| -0.301345104 | 1 | 0.000325  | 2 | Rps27l        |
| -0.546636663 | 1 | 0.0003324 | 2 | Tcp11l2       |
| 0.254539431  | 1 | 0.000334  | 2 | Al607873      |
| 0.360204195  | 1 | 0.000338  | 2 | Neat1         |
| -0.353329525 | 1 | 0.0003407 | 2 | Ubqln1        |
| -0.261317628 | 1 | 0.0003413 | 2 | Polr2g        |
| -0.282850334 | 1 | 0.0003555 | 2 | Stt3b         |
| -0.261916909 | 1 | 0.0003561 | 2 | Eif3a         |
| -0.426653941 | 1 | 0.0003576 | 2 | Lmnb1         |
| 0.541738217  | 1 | 0.0003592 | 2 | Oasl2         |
| -0.410932801 | 1 | 0.0003599 | 2 | Nemf          |
| -0.337582662 | 1 | 0.0003614 | 2 | Psmc5         |
| -0.410219388 | 1 | 0.0003623 | 2 | Mtmr14        |
| -0.302421894 | 1 | 0.0003663 | 2 | Cpeb4         |
| -0.333360903 | 1 | 0.0003788 | 2 | Tsta3         |
| -0.673574773 | 1 | 0.0003821 | 2 | Dusp2         |
| 0.418658175  | 1 | 0.0003843 | 2 | Ier2          |
| -0.767691252 | 1 | 0.0003857 | 2 | Tle1          |
| -0.560003965 | 1 | 0.0003879 | 2 | Scyl2         |
| -0.564572019 | 1 | 0.0003933 | 2 | Scimp         |
| 0.472548417  | 1 | 0.0003952 | 2 | Fcho2         |
| -0.338768315 | 1 | 0.0003981 | 2 | Npepps        |
| -0.309749789 | 1 | 0.0003983 | 2 | Ssr1          |
| -0.648955318 | 1 | 0.0004028 | 2 | Mical1        |
| -0.351524258 | 1 | 0.0004055 | 2 | Hnrnpc        |
| -0.311424763 | 1 | 0.0004067 | 2 | Paip2         |
| 0.294945794  | 1 | 0.0004085 | 2 | Ptpn18        |
| 0.709190181  | 1 | 0.0004139 | 2 | Snx13         |
| 0.809143097  | 1 | 0.0004175 | 2 | Micu1         |
| -0.445112198 | 1 | 0.0004256 | 2 | Ap1s1         |
| -0.307181704 | 1 | 0.0004294 | 2 | Kpna3         |
| -0.673309398 | 1 | 0.0004317 | 2 | Yars          |
| -0.305357848 | 1 | 0.000433  | 2 | Arid5b        |
| 0.444203945  | 1 | 0.0004496 | 2 | Clec4a2       |
| -1.0481551   | 1 | 0.0004498 | 2 | Klhdc4        |
| 0.350041195  | 1 | 0.0004528 | 2 | Atxn7l3b      |
| -0.471402341 | 1 | 0.0004562 | 2 | Mpp5          |
| 0.557969869  | 1 | 0.0004603 | 2 | Add3          |
| -0.422341665 | 1 | 0.0004631 | 2 | Tmx4          |
| -0.482958389 | 1 | 0.0004671 | 2 | Cdk2ap2       |
| -0.465780853 | 1 | 0.00047   | 2 | Itpk1         |
| -0.286661443 | 1 | 0.0004705 | 2 | Gtf3a         |
| -0.330419188 | 1 | 0.0004756 | 2 | Setd3         |
| -0.470639394 | 1 | 0.0004821 | 2 | Ltv1          |
| 0.392350207  | 1 | 0.0004899 | 2 | Aes           |
| -0.494342832 | 1 | 0.0004966 | 2 | Mllt6         |
| -0.569602523 | 1 | 0.000499  | 2 | Olfml3        |
| -0.273854337 | 1 | 0.0005088 | 2 | Rala          |
| -0.657212363 | 1 | 0.0005238 | 2 | Kansl3        |
| -0.255750631 | 1 | 0.0005246 | 2 | Txndc9        |
| -0.559039747 | 1 | 0.000526  | 2 | 4833439L19Rik |
| -0.298984998 | 1 | 0.0005268 | 2 | Cers5         |
| -0.288443165 | 1 | 0.0005273 | 2 | Polr2f        |

|              |   |           |   |               |
|--------------|---|-----------|---|---------------|
| 0.408166411  | 1 | 0.0005304 | 2 | Bbx           |
| -0.568795672 | 1 | 0.0005306 | 2 | Slain2        |
| -0.292246753 | 1 | 0.0005419 | 2 | Piezo1        |
| -0.422664115 | 1 | 0.0005455 | 2 | Ino80         |
| -0.425365584 | 1 | 0.0005557 | 2 | 2310022A10Rik |
| 1.016699341  | 1 | 0.0005614 | 2 | Tstd2         |
| -0.339696668 | 1 | 0.0005626 | 2 | Tmem167       |
| 0.539428989  | 1 | 0.0005723 | 2 | Adam19        |
| -0.260544326 | 1 | 0.0005738 | 2 | Glrx5         |
| -0.379930186 | 1 | 0.0005742 | 2 | Bub3          |
| -0.292050027 | 1 | 0.0005776 | 2 | Baz1a         |
| -0.500093145 | 1 | 0.0005908 | 2 | Syne1         |
| -0.34859467  | 1 | 0.0005926 | 2 | Vps28         |
| -0.329216868 | 1 | 0.0005961 | 2 | Mtch2         |
| -0.279198974 | 1 | 0.0006033 | 2 | Ppm1h         |
| 0.296670313  | 1 | 0.0006042 | 2 | Zswim6        |
| -0.30808769  | 1 | 0.0006109 | 2 | Il17ra        |
| -0.317982164 | 1 | 0.0006146 | 2 | Srsf7         |
| -0.318993935 | 1 | 0.0006159 | 2 | Med10         |
| -0.403334169 | 1 | 0.0006435 | 2 | Prelid1       |
| 0.390804008  | 1 | 0.0006449 | 2 | Filip1l       |
| -0.3520044   | 1 | 0.0006499 | 2 | Clpp          |
| -1.043940346 | 1 | 0.0006596 | 2 | Samsn1        |
| -0.620625608 | 1 | 0.0006612 | 2 | Pgs1          |
| -0.271483446 | 1 | 0.0006642 | 2 | Etf1          |
| -0.708877446 | 1 | 0.0006711 | 2 | Tmem119       |
| 0.264762885  | 1 | 0.000678  | 2 | Trim30d       |
| 0.731294947  | 1 | 0.0006855 | 2 | Jup           |
| -0.398852564 | 1 | 0.0006869 | 2 | Emc4          |
| -0.306541175 | 1 | 0.0006894 | 2 | Atp5j         |
| 0.545700187  | 1 | 0.0006901 | 2 | Tspan3        |
| -0.397442584 | 1 | 0.0006952 | 2 | Ube2j1        |
| -0.375118635 | 1 | 0.0007053 | 2 | Arid4b        |
| -0.25686526  | 1 | 0.0007091 | 2 | Naa38         |
| -0.356964867 | 1 | 0.0007101 | 2 | Xpo1          |
| -0.323658563 | 1 | 0.0007108 | 2 | Ppp6c         |
| -0.270229882 | 1 | 0.0007144 | 2 | Insig2        |
| -0.553510669 | 1 | 0.0007235 | 2 | Samd8         |
| -0.286348807 | 1 | 0.0007298 | 2 | Mrpl37        |
| -0.499543645 | 1 | 0.0007313 | 2 | Mbtd1         |
| -0.387037914 | 1 | 0.0007401 | 2 | Msra          |
| -0.473045181 | 1 | 0.0007444 | 2 | Cpsf6         |
| -0.307270183 | 1 | 0.0007472 | 2 | Tma7          |
| -0.323351069 | 1 | 0.0007543 | 2 | Atp5l         |
| 0.582992084  | 1 | 0.0007568 | 2 | Fkbp15        |
| 0.276814824  | 1 | 0.0007642 | 2 | Sft2d2        |
| -0.709366101 | 1 | 0.0007698 | 2 | Ubxn2a        |
| 0.61350728   | 1 | 0.0007717 | 2 | Prkab1        |
| 0.514225211  | 1 | 0.0007757 | 2 | Smim15        |
| -0.262989555 | 1 | 0.0007766 | 2 | Odf2          |
| -0.368573356 | 1 | 0.0007819 | 2 | Thoc2         |
| -0.257837525 | 1 | 0.0007851 | 2 | Gm3258        |
| -0.614110031 | 1 | 0.0007881 | 2 | AW112010      |
| 0.406384463  | 1 | 0.0007927 | 2 | Ppp1r12c      |
| -0.311650082 | 1 | 0.0008007 | 2 | Aph1c         |
| 0.477781419  | 1 | 0.0008226 | 2 | Rab1b         |
| -0.478982365 | 1 | 0.0008306 | 2 | Gga2          |
| -0.450665945 | 1 | 0.0008343 | 2 | Rfwd2         |
| -0.782621307 | 1 | 0.0008343 | 2 | Il1a          |
| 0.804766953  | 1 | 0.0008389 | 2 | 2810025M15Rik |
| -0.307807976 | 1 | 0.0008396 | 2 | Atp5d         |

|              |   |           |   |               |
|--------------|---|-----------|---|---------------|
| 0.492313334  | 1 | 0.0008442 | 2 | Clasp2        |
| -0.350707245 | 1 | 0.0008464 | 2 | Rars          |
| -0.298615171 | 1 | 0.0008681 | 2 | Mrpl4         |
| -0.389211569 | 1 | 0.0008708 | 2 | Dot1l         |
| -0.447887314 | 1 | 0.0008724 | 2 | Bhlhe41       |
| -0.389198831 | 1 | 0.0008811 | 2 | Higd1a        |
| -0.472438356 | 1 | 0.0008975 | 2 | Bop1          |
| -0.267289667 | 1 | 0.0009039 | 2 | Chchd3        |
| -0.368906979 | 1 | 0.0009114 | 2 | Lage3         |
| -0.431903812 | 1 | 0.0009133 | 2 | Abcb7         |
| -0.306146756 | 1 | 0.0009386 | 2 | Med28         |
| -0.575709237 | 1 | 0.0009456 | 2 | Ramp1         |
| 0.35099809   | 1 | 0.0009788 | 2 | Tifab         |
| -0.255384438 | 1 | 0.0010454 | 2 | Cox6c         |
| -0.569600938 | 1 | 0.0010605 | 2 | Pop4          |
| -0.4202542   | 1 | 0.0010607 | 2 | B9d2          |
| -0.444524964 | 1 | 0.0010642 | 2 | Otud6b        |
| -0.364416536 | 1 | 0.0010656 | 2 | Tbpl1         |
| 0.425384365  | 1 | 0.0010758 | 2 | Gtf2i         |
| -0.270241541 | 1 | 0.0010794 | 2 | Asap1         |
| -0.348051431 | 1 | 0.0011012 | 2 | Rbbp6         |
| -0.292936309 | 1 | 0.001103  | 2 | Mrpl54        |
| 0.789336895  | 1 | 0.0011143 | 2 | Polg          |
| 0.345360397  | 1 | 0.0011301 | 2 | Pcnp          |
| -0.460033185 | 1 | 0.0011337 | 2 | Mir22hg       |
| 0.616849601  | 1 | 0.0011446 | 2 | Ephx1         |
| -0.362450348 | 1 | 0.0011499 | 2 | Mmd           |
| -0.38012398  | 1 | 0.0011543 | 2 | Mien1         |
| 0.591294591  | 1 | 0.0011712 | 2 | Baz1b         |
| 0.390430388  | 1 | 0.0011744 | 2 | Serpinb6a     |
| -0.490552856 | 1 | 0.0011823 | 2 | Avpi1         |
| 0.362950233  | 1 | 0.0011846 | 2 | Rab7l1        |
| -0.358986445 | 1 | 0.0011929 | 2 | Akip1         |
| -0.343201985 | 1 | 0.0012156 | 2 | Gcc2          |
| -0.26600505  | 1 | 0.0012237 | 2 | Mrpl36        |
| -0.441001588 | 1 | 0.0012475 | 2 | Gas2l3        |
| 0.385845882  | 1 | 0.0012563 | 2 | Gpr183        |
| -0.429596641 | 1 | 0.0012751 | 2 | Nrd1          |
| 0.346867791  | 1 | 0.0013149 | 2 | Ubtf          |
| 0.383056118  | 1 | 0.0013179 | 2 | Igf1r         |
| -0.354276658 | 1 | 0.0013369 | 2 | Josd1         |
| -0.284484048 | 1 | 0.0013379 | 2 | Npc1          |
| 0.585341854  | 1 | 0.0013429 | 2 | Mid1ip1       |
| 0.467689437  | 1 | 0.0013457 | 2 | Cd2ap         |
| -0.432133775 | 1 | 0.0013503 | 2 | Desi2         |
| -0.320655387 | 1 | 0.0013512 | 2 | 2300009A05Rik |
| 0.401648438  | 1 | 0.0013569 | 2 | Epn1          |
| -0.435284408 | 1 | 0.0013607 | 2 | N4bp1         |
| -0.681116775 | 1 | 0.0013783 | 2 | Ncapg2        |
| -0.261709335 | 1 | 0.0013864 | 2 | Map3k2        |
| -0.36045265  | 1 | 0.0013973 | 2 | Cep83         |
| -0.259767874 | 1 | 0.0014139 | 2 | Minos1        |
| -0.322977729 | 1 | 0.0014231 | 2 | Pcmt1         |
| -0.448069069 | 1 | 0.0014461 | 2 | Fhod1         |
| 0.768421886  | 1 | 0.0014573 | 2 | Ppip5k2       |
| 0.346309234  | 1 | 0.0014639 | 2 | Cdr2          |
| -0.281241541 | 1 | 0.0014732 | 2 | Mrpl34        |
| 0.273129224  | 1 | 0.0014739 | 2 | Gxylt1        |
| 0.314941532  | 1 | 0.0014894 | 2 | Ncf1          |
| -0.330252256 | 1 | 0.0014999 | 2 | Kpna1         |
| 0.374624085  | 1 | 0.0015026 | 2 | Tpcn1         |

|              |   |           |   |               |
|--------------|---|-----------|---|---------------|
| -0.327140711 | 1 | 0.0015064 | 2 | Wdr43         |
| 0.456538845  | 1 | 0.0015125 | 2 | Atg13         |
| 0.331955125  | 1 | 0.0015262 | 2 | Zbp1          |
| -0.296152236 | 1 | 0.0015265 | 2 | Slc39a6       |
| 0.665879869  | 1 | 0.0015316 | 2 | Zbtb4         |
| -0.361459038 | 1 | 0.0015463 | 2 | Mvp           |
| -0.364587833 | 1 | 0.0016244 | 2 | Slc35b2       |
| -0.432167399 | 1 | 0.0016251 | 2 | Mrpl17        |
| -0.336812187 | 1 | 0.0016369 | 2 | Polr2j        |
| -0.265176663 | 1 | 0.001637  | 2 | Acsl4         |
| -0.379621856 | 1 | 0.0016887 | 2 | Ints12        |
| -0.256866468 | 1 | 0.0017052 | 2 | Cxcl2         |
| -0.263785383 | 1 | 0.0017129 | 2 | St3gal1       |
| -0.372594241 | 1 | 0.0017187 | 2 | Cds1          |
| -0.311751614 | 1 | 0.0017202 | 2 | Ngfrap1       |
| -0.463606464 | 1 | 0.0017206 | 2 | Cdc42ep4      |
| -0.321962726 | 1 | 0.0017266 | 2 | Rpl18         |
| -0.320865089 | 1 | 0.0017451 | 2 | Tmem192       |
| -0.386211945 | 1 | 0.0017532 | 2 | Dda1          |
| -0.339933465 | 1 | 0.0017894 | 2 | Polr3k        |
| -0.312147703 | 1 | 0.0017998 | 2 | Zmym2         |
| 0.772602585  | 1 | 0.0018449 | 2 | Galk1         |
| 0.62314578   | 1 | 0.0018462 | 2 | Dnajc13       |
| -0.458531328 | 1 | 0.0018567 | 2 | Bola3         |
| 0.511916863  | 1 | 0.001862  | 2 | Tmem55b       |
| -0.347725273 | 1 | 0.0018706 | 2 | Mknk2         |
| 0.782098179  | 1 | 0.0018839 | 2 | Prune2        |
| 0.624087962  | 1 | 0.0019063 | 2 | Rere          |
| -0.383574389 | 1 | 0.001919  | 2 | Ahcyl2        |
| -0.38156306  | 1 | 0.0019241 | 2 | Dusp16        |
| -0.31942269  | 1 | 0.0019256 | 2 | Tnf           |
| -0.591529387 | 1 | 0.0019325 | 2 | Polr2b        |
| 0.559794555  | 1 | 0.0019361 | 2 | 2700089E24Rik |
| -0.254139744 | 1 | 0.0019494 | 2 | H2-Ab1        |
| -0.288024382 | 1 | 0.0019512 | 2 | Zfand3        |
| -0.372749088 | 1 | 0.001954  | 2 | Fopnl         |
| -0.276572107 | 1 | 0.001989  | 2 | Katna1        |
| 0.345558263  | 1 | 0.0019916 | 2 | Hip1          |
| 0.579918202  | 1 | 0.0020097 | 2 | Rasa1         |
| -0.287739465 | 1 | 0.0020307 | 2 | Mrpl45        |
| -0.282945615 | 1 | 0.0020445 | 2 | Zbtb11        |
| -0.39318578  | 1 | 0.0020624 | 2 | Dnajb6        |
| 0.250485719  | 1 | 0.0021084 | 2 | Naaa          |
| -0.271303122 | 1 | 0.0021109 | 2 | Cnppd1        |
| -0.42459975  | 1 | 0.0021232 | 2 | Ftsj3         |
| 0.454437066  | 1 | 0.0021288 | 2 | Dnajb1        |
| -0.302084676 | 1 | 0.0021331 | 2 | Ythdf1        |
| -0.327221878 | 1 | 0.0021391 | 2 | Selplg        |
| 0.624664117  | 1 | 0.0021517 | 2 | Dcxr          |
| -0.493495075 | 1 | 0.0021575 | 2 | Mgrn1         |
| -0.458467315 | 1 | 0.0021823 | 2 | Exosc9        |
| 0.283815584  | 1 | 0.0021978 | 2 | Tdrd7         |
| -0.437669572 | 1 | 0.002199  | 2 | Mmadhc        |
| -0.459335479 | 1 | 0.0022363 | 2 | Dst           |
| -0.293167911 | 1 | 0.0022494 | 2 | Wac           |
| -0.289352688 | 1 | 0.0022519 | 2 | Chmp2b        |
| -0.322705051 | 1 | 0.0022537 | 2 | 1500011K16Rik |
| -0.273144785 | 1 | 0.0022551 | 2 | Ranbp1        |
| 0.554498632  | 1 | 0.0022581 | 2 | Slc29a1       |
| -0.427596657 | 1 | 0.0022654 | 2 | Rpl19         |
| -0.26738707  | 1 | 0.0022734 | 2 | Pbrm1         |

|              |   |           |   |               |
|--------------|---|-----------|---|---------------|
| -0.267383681 | 1 | 0.0023376 | 2 | Med13l        |
| 0.462920795  | 1 | 0.0023397 | 2 | Kif1b         |
| -0.990413602 | 1 | 0.0023522 | 2 | Grap2         |
| -0.409564561 | 1 | 0.0023746 | 2 | Tssc1         |
| -0.39679977  | 1 | 0.002412  | 2 | Fau           |
| 0.691861242  | 1 | 0.0024266 | 2 | Cmklr1        |
| -0.606223292 | 1 | 0.0024292 | 2 | Zfp516        |
| -0.251017914 | 1 | 0.0024386 | 2 | Hspbp1        |
| -0.607787427 | 1 | 0.0024463 | 2 | Pls3          |
| 0.694001382  | 1 | 0.0024528 | 2 | Pde1b         |
| -0.533778357 | 1 | 0.002455  | 2 | Pdgfb         |
| -0.283152156 | 1 | 0.0024602 | 2 | Snx17         |
| -0.318355533 | 1 | 0.0024651 | 2 | Cln5          |
| -0.267379659 | 1 | 0.0025063 | 2 | Tspan14       |
| -0.288791452 | 1 | 0.0025211 | 2 | Ssu72         |
| -0.26472923  | 1 | 0.0025732 | 2 | Isy1          |
| 0.727498021  | 1 | 0.0025765 | 2 | Slc43a2       |
| -0.315337093 | 1 | 0.002579  | 2 | Slc11a1       |
| 0.557126954  | 1 | 0.0026093 | 2 | Mgat1         |
| -0.426785114 | 1 | 0.0026102 | 2 | Samd4b        |
| -0.403790557 | 1 | 0.0026241 | 2 | Gyg           |
| 0.520532286  | 1 | 0.0026308 | 2 | Rab31         |
| -0.49326677  | 1 | 0.0026459 | 2 | Pik3r1        |
| -0.431042703 | 1 | 0.0026636 | 2 | Srpr          |
| -0.747392396 | 1 | 0.002693  | 2 | Ptafr         |
| -0.298206669 | 1 | 0.0027264 | 2 | Kctd10        |
| -0.436955044 | 1 | 0.0027284 | 2 | Col14a1       |
| -0.409588661 | 1 | 0.0027751 | 2 | Eif3b         |
| -0.40132479  | 1 | 0.0027821 | 2 | Hmgcl         |
| -0.258516205 | 1 | 0.0027987 | 2 | Qdpr          |
| -0.559202362 | 1 | 0.0028095 | 2 | 2310045N01Rik |
| -0.439091036 | 1 | 0.0028149 | 2 | Mllt4         |
| 0.377693384  | 1 | 0.002823  | 2 | Ypel3         |
| -0.302948676 | 1 | 0.0028804 | 2 | Sar1b         |
| -0.274928838 | 1 | 0.0028947 | 2 | Ufd1l         |
| -0.346029511 | 1 | 0.0029064 | 2 | Cmas          |
| -0.290501786 | 1 | 0.0029615 | 2 | Rchy1         |
| -0.324141782 | 1 | 0.0029915 | 2 | Inpp5b        |
| -0.438238012 | 1 | 0.0030066 | 2 | Spast         |
| -0.424056436 | 1 | 0.0030233 | 2 | D16Ertd472e   |
| -0.264727422 | 1 | 0.0030293 | 2 | Mad2l2        |
| -0.260975737 | 1 | 0.0030367 | 2 | Copg1         |
| -0.598330786 | 1 | 0.0030633 | 2 | Itgb1bp1      |
| -0.475378958 | 1 | 0.0030727 | 2 | Mtfr1l        |
| 0.40782849   | 1 | 0.003163  | 2 | Tmem141       |
| -0.255072197 | 1 | 0.0032037 | 2 | Rpp21         |
| -0.517653359 | 1 | 0.0032297 | 2 | Dync1li1      |
| 0.443592015  | 1 | 0.0032585 | 2 | Fbxw4         |
| 0.464828671  | 1 | 0.0032657 | 2 | Pla2g16       |
| -0.25567718  | 1 | 0.0033961 | 2 | Vat1          |
| 0.342013707  | 1 | 0.0033987 | 2 | Cd37          |
| -0.389342752 | 1 | 0.0034154 | 2 | Bcas2         |
| -0.322639834 | 1 | 0.0034283 | 2 | Klhdc3        |
| 0.941008798  | 1 | 0.0034385 | 2 | Phyhd1        |
| -0.277630868 | 1 | 0.0034413 | 2 | Coa5          |
| -0.436444832 | 1 | 0.003446  | 2 | Vps26b        |
| -0.338030798 | 1 | 0.0035047 | 2 | Rps19         |
| -0.589087692 | 1 | 0.0035298 | 2 | Tbc1d1        |
| 0.397359826  | 1 | 0.0035992 | 2 | Osbpl11       |
| -0.819135355 | 1 | 0.0036358 | 2 | Stat4         |
| -0.391081817 | 1 | 0.0036681 | 2 | Olfm1         |



|              |   |           |   |               |
|--------------|---|-----------|---|---------------|
| 0.341445888  | 1 | 0.0037123 | 2 | Sdc3          |
| 0.264946404  | 1 | 0.0037266 | 2 | Asah1         |
| -0.285285825 | 1 | 0.0037338 | 2 | Rbbp7         |
| -0.374440086 | 1 | 0.0037498 | 2 | Zfp592        |
| -0.449121211 | 1 | 0.0037698 | 2 | Fcgr4         |
| 0.442160703  | 1 | 0.0037724 | 2 | Txndc16       |
| 0.514620395  | 1 | 0.0038031 | 2 | Dync1li2      |
| -0.653246951 | 1 | 0.0039417 | 2 | Smad7         |
| 0.379474304  | 1 | 0.0039931 | 2 | Ccdc134       |
| 0.536043146  | 1 | 0.0040336 | 2 | Lman1         |
| -0.251198434 | 1 | 0.0040851 | 2 | Mrpl24        |
| -0.382206762 | 1 | 0.0041236 | 2 | Hat1          |
| -0.251322794 | 1 | 0.0041251 | 2 | Usp15         |
| -0.422365401 | 1 | 0.0041402 | 2 | Wdr48         |
| 0.283653937  | 1 | 0.004186  | 2 | Kat6a         |
| -0.312420734 | 1 | 0.0042007 | 2 | Gpaa1         |
| -0.328998938 | 1 | 0.0042093 | 2 | Esco1         |
| -0.535576074 | 1 | 0.0042108 | 2 | Ube2d2a       |
| -0.333430715 | 1 | 0.0042363 | 2 | Ptp4a1        |
| -0.433214428 | 1 | 0.0042952 | 2 | Srf           |
| 0.487199075  | 1 | 0.0043165 | 2 | Pkp4          |
| -0.493261048 | 1 | 0.0043365 | 2 | Creb5         |
| -0.382590132 | 1 | 0.0043784 | 2 | Hnrnpdl       |
| 0.402723181  | 1 | 0.0043792 | 2 | Psmb9         |
| -0.492548103 | 1 | 0.004418  | 2 | Hscb          |
| -0.300944251 | 1 | 0.0044247 | 2 | Rsrc2         |
| -0.27335001  | 1 | 0.0044943 | 2 | Snx18         |
| -0.264507702 | 1 | 0.0045757 | 2 | Hbp1          |
| -0.331863106 | 1 | 0.0046247 | 2 | Trnau1ap      |
| -0.297265688 | 1 | 0.0047783 | 2 | Usp7          |
| -0.268844717 | 1 | 0.0047795 | 2 | Ikbkb         |
| -0.284525035 | 1 | 0.0047907 | 2 | Lamtor4       |
| -0.261080288 | 1 | 0.004882  | 2 | Ccdc53        |
| 0.452565917  | 1 | 0.0049387 | 2 | Ncoa1         |
| -0.56610182  | 1 | 0.0049924 | 2 | Pmaip1        |
| 0.676895045  | 1 | 0.0050001 | 2 | Mon2          |
| -0.279436636 | 1 | 0.005009  | 2 | Eif3i         |
| -0.533453798 | 1 | 0.0050538 | 2 | Lyar          |
| -0.477998155 | 1 | 0.0050909 | 2 | Pde1b         |
| 0.591854348  | 1 | 0.0051302 | 2 | Sh3pxd2a      |
| 0.395146152  | 1 | 0.0051479 | 2 | Nav1          |
| 0.446836117  | 1 | 0.0051905 | 2 | Zeb2os        |
| -0.454630917 | 1 | 0.0052338 | 2 | Prkrir        |
| 0.655879019  | 1 | 0.0053007 | 2 | Arhgap12      |
| -0.26600505  | 1 | 0.0053187 | 2 | Fam175b       |
| -0.343920511 | 1 | 0.0053191 | 2 | Trim27        |
| -0.374118581 | 1 | 0.0053381 | 2 | Fam134b       |
| -0.401023504 | 1 | 0.0053439 | 2 | Fubp1         |
| -0.433946463 | 1 | 0.0053648 | 2 | 1700025G04Rik |
| -0.446258137 | 1 | 0.0053801 | 2 | Rpl27a        |
| -0.444477736 | 1 | 0.0053885 | 2 | Cherp         |
| -0.32377362  | 1 | 0.0054032 | 2 | Aco2          |
| -0.566514067 | 1 | 0.0054586 | 2 | Tjp2          |
| -0.338489102 | 1 | 0.0055622 | 2 | Dohh          |
| -0.562327729 | 1 | 0.005608  | 2 | Lrch1         |
| -0.419132708 | 1 | 0.0057013 | 2 | Otud5         |
| -0.363872126 | 1 | 0.0057044 | 2 | Fxr2          |
| 0.859863918  | 1 | 0.0057457 | 2 | Itpripl1      |
| 0.27322606   | 1 | 0.0057895 | 2 | Ergic3        |
| 0.504648812  | 1 | 0.0058131 | 2 | Clec4b1       |
| -0.334771645 | 1 | 0.0058195 | 2 | Prkaa1        |

|              |          |           |   |           |
|--------------|----------|-----------|---|-----------|
| -0.30126687  | 1        | 0.0059521 | 2 | Ptrhd1    |
| 0.628786807  | 1        | 0.0059628 | 2 | Tnfaip8l2 |
| -0.267957446 | 1        | 0.0059713 | 2 | Ndufb2    |
| -0.322526632 | 1        | 0.0059946 | 2 | Adap1     |
| 0.353646304  | 1        | 0.0061324 | 2 | Crebrf    |
| -0.545023677 | 1        | 0.0062859 | 2 | Cspp1     |
| -0.371679193 | 1        | 0.0063536 | 2 | H2afy     |
| -0.296665425 | 1        | 0.0064476 | 2 | Mrpl32    |
| -0.393144382 | 1        | 0.0064713 | 2 | Nr4a1     |
| 0.401331829  | 1        | 0.0064855 | 2 | Fads1     |
| 0.280627756  | 1        | 0.0064907 | 2 | Irak3     |
| 0.440580649  | 1        | 0.006498  | 2 | Pdia4     |
| -0.258424331 | 1        | 0.0067237 | 2 | Dhx9      |
| -0.373109433 | 1        | 0.0067419 | 2 | Stk16     |
| 0.450985205  | 1        | 0.0067608 | 2 | Trib1     |
| -0.467261913 | 1        | 0.0068422 | 2 | Ube2z     |
| 0.28670093   | 1        | 0.0068838 | 2 | Hprt      |
| 0.616200084  | 1        | 0.00693   | 2 | Zfp467    |
| -0.610587999 | 1        | 0.006973  | 2 | Arl6ip5   |
| -0.399823882 | 1        | 0.0070517 | 2 | Ubqln2    |
| -0.312268577 | 1        | 0.0070694 | 2 | Tor1a     |
| -0.295990193 | 1        | 0.0072184 | 2 | Mrps16    |
| -0.336989413 | 1        | 0.0072357 | 2 | Gtf3c2    |
| 0.614972445  | 1        | 0.0072516 | 2 | Strn4     |
| -0.272603234 | 1        | 0.0072715 | 2 | Ndufb10   |
| -0.795733928 | 1        | 0.0074213 | 2 | Kif21b    |
| -0.281462092 | 1        | 0.0075426 | 2 | Plk3      |
| 0.409864436  | 1        | 0.0076716 | 2 | G3bp2     |
| -0.308647019 | 1        | 0.0076813 | 2 | Ash2l     |
| -0.275874902 | 1        | 0.0076955 | 2 | Erp44     |
| -0.675430347 | 1        | 0.0078925 | 2 | Rapgef1   |
| 0.417022258  | 1        | 0.0079192 | 2 | Eml4      |
| -0.576047345 | 1        | 0.0079277 | 2 | Hspa13    |
| 0.282203172  | 1        | 0.0080033 | 2 | Ap1s2     |
| -0.273851871 | 1        | 0.0080224 | 2 | Traf6     |
| 0.325721952  | 1        | 0.0080519 | 2 | Leng8     |
| -0.428502584 | 1        | 0.0080862 | 2 | Fam129a   |
| -0.270846757 | 1        | 0.0083102 | 2 | Sepn1     |
| -0.319736326 | 1        | 0.0083459 | 2 | Zmiz1     |
| -0.50497373  | 1        | 0.0084248 | 2 | Rpl31     |
| -0.271604546 | 1        | 0.0086222 | 2 | Etv6      |
| -0.396804833 | 1        | 0.0086266 | 2 | Lpcat2    |
| -0.376584348 | 1        | 0.0087005 | 2 | Oxa1l     |
| -0.342527348 | 1        | 0.0088488 | 2 | Dcun1d5   |
| 0.392455962  | 1        | 0.0088769 | 2 | Casp8     |
| -0.286462743 | 1        | 0.0089203 | 2 | Dock2     |
| -0.308955233 | 1        | 0.008998  | 2 | Acd       |
| 0.654456552  | 1        | 0.0090478 | 2 | Tbc1d14   |
| -0.409783149 | 1        | 0.0091401 | 2 | Psmd3     |
| -0.319529603 | 1        | 0.0091744 | 2 | Cyld      |
| -0.270024914 | 1        | 0.0091989 | 2 | Cyc1      |
| -0.368801241 | 1        | 0.0092217 | 2 | Kif3a     |
| 0.281366335  | 1        | 0.0092478 | 2 | Rtp4      |
| 0.580404251  | 1        | 0.0093138 | 2 | Abcc1     |
| 0.299685011  | 1        | 0.0093952 | 2 | Rsrp1     |
| -0.25865773  | 1        | 0.0093964 | 2 | Strap     |
| 0.4247052    | 1        | 0.009468  | 2 | Ptpa      |
| 0.610780727  | 1        | 0.0096951 | 2 | Tmem214   |
| -0.26386382  | 1        | 0.009804  | 2 | Ythdf2    |
| 0.268623712  | 1        | 0.0098272 | 2 | Hmox2     |
| -0.788186675 | 2.62E-23 | 1.97E-27  | 3 | Ly6e      |

|              |             |          |   |               |
|--------------|-------------|----------|---|---------------|
| 0.752622516  | 1.29E-15    | 9.66E-20 | 3 | Cd72          |
| -0.750696883 | 7.37E-14    | 5.52E-18 | 3 | Ifitm3        |
| -0.933922958 | 1.16E-13    | 8.70E-18 | 3 | Ccl9          |
| 0.516649481  | 1.31E-13    | 9.79E-18 | 3 | Hexb          |
| -1.277773409 | 1.56E-13    | 1.17E-17 | 3 | Mrc1          |
| 0.510564986  | 4.08E-13    | 3.06E-17 | 3 | Lpl           |
| -0.806415806 | 1.03E-11    | 7.73E-16 | 3 | Ccl6          |
| 0.383011122  | 1.10E-11    | 8.26E-16 | 3 | Mpeg1         |
| 0.567928571  | 2.06E-11    | 1.54E-15 | 3 | Tgfbr1        |
| 0.560010433  | 1.17E-10    | 8.75E-15 | 3 | Cd9           |
| 0.401189832  | 5.52E-10    | 4.14E-14 | 3 | Cxcl16        |
| -1.194269686 | 3.78E-09    | 2.83E-13 | 3 | Pf4           |
| 0.642214054  | 7.13E-09    | 5.34E-13 | 3 | Cpd           |
| 0.296228517  | 1.11E-08    | 8.28E-13 | 3 | Lgals3        |
| -1.635550152 | 1.19E-08    | 8.89E-13 | 3 | F13a1         |
| 0.734465501  | 3.15E-08    | 2.36E-12 | 3 | Syne1         |
| 0.494035126  | 5.86E-08    | 4.39E-12 | 3 | Gusb          |
| -1.537533496 | 6.12E-08    | 4.58E-12 | 3 | Ccl8          |
| -0.53194022  | 8.61E-08    | 6.45E-12 | 3 | H2-Ab1        |
| 0.796750036  | 8.78E-08    | 6.58E-12 | 3 | Syt11         |
| -1.555428345 | 9.13E-08    | 6.84E-12 | 3 | Cbr2          |
| 0.821505545  | 9.69E-08    | 7.26E-12 | 3 | Pdgfb         |
| 0.369687336  | 1.50E-07    | 1.12E-11 | 3 | Clic4         |
| -1.413929145 | 1.63E-07    | 1.22E-11 | 3 | Ccl5          |
| 0.392199858  | 2.78E-07    | 2.08E-11 | 3 | Ms4a7         |
| 0.686439576  | 2.94E-07    | 2.20E-11 | 3 | 2210408F21Rik |
| 0.39156518   | 3.16E-07    | 2.37E-11 | 3 | Trem2         |
| -0.739171897 | 3.48E-07    | 2.61E-11 | 3 | Ifi2712a      |
| 0.697632894  | 5.70E-07    | 4.27E-11 | 3 | Fam102b       |
| -0.602680686 | 7.70E-07    | 5.77E-11 | 3 | H2-Eb1        |
| 0.254019239  | 9.25E-07    | 6.93E-11 | 3 | Iqgap1        |
| 0.40811956   | 9.37E-07    | 7.02E-11 | 3 | Slamf9        |
| -0.489108831 | 1.04E-06    | 7.80E-11 | 3 | H2-Aa         |
| 0.464795472  | 1.17E-06    | 8.76E-11 | 3 | Ckb           |
| 0.44340605   | 1.42E-06    | 1.06E-10 | 3 | Abcg1         |
| 0.555051559  | 1.91E-06    | 1.43E-10 | 3 | Dpep2         |
| -1.037180368 | 2.61E-06    | 1.95E-10 | 3 | Cfh           |
| 0.28143296   | 2.69E-06    | 2.01E-10 | 3 | Anxa5         |
| 1.082915775  | 3.81E-06    | 2.85E-10 | 3 | Pcp4l1        |
| 0.647839001  | 6.28E-06    | 4.71E-10 | 3 | Nes           |
| 0.360605291  | 7.44E-06    | 5.57E-10 | 3 | Gatm          |
| 0.411588859  | 1.00E-05    | 7.49E-10 | 3 | Slamf7        |
| -0.726693574 | 1.01E-05    | 7.59E-10 | 3 | H2-DMa        |
| 0.730689632  | 1.20E-05    | 8.96E-10 | 3 | Cdk18         |
| 0.515648294  | 1.26E-05    | 9.47E-10 | 3 | Epb4.1l2      |
| 1.020020537  | 1.44E-05    | 1.08E-09 | 3 | Serpine1      |
| 0.469979419  | 1.53E-05    | 1.15E-09 | 3 | Glpr1         |
| 0.394390535  | 1.66E-05    | 1.25E-09 | 3 | Gng5          |
| 0.336510723  | 1.88E-05    | 1.41E-09 | 3 | Lsp1          |
| 0.607744242  | 2.22E-05    | 1.66E-09 | 3 | Zmynd15       |
| 0.566325698  | 2.28E-05    | 1.71E-09 | 3 | Atp5sl        |
| 0.592313775  | 4.34E-05    | 3.25E-09 | 3 | Flot2         |
| 0.581333666  | 4.95E-05    | 3.70E-09 | 3 | Atp8b4        |
| 0.348459706  | 5.24E-05    | 3.92E-09 | 3 | Capg          |
| 0.714120096  | 5.81E-05    | 4.35E-09 | 3 | Tnfsf13b      |
| 0.602290889  | 6.75E-05    | 5.05E-09 | 3 | Ptk2b         |
| 0.618390427  | 8.13E-05    | 6.09E-09 | 3 | Pdlim7        |
| 0.76819815   | 9.01E-05    | 6.75E-09 | 3 | Cadm1         |
| 0.324709703  | 0.000107196 | 8.03E-09 | 3 | Tkt           |
| -0.986713076 | 0.000120233 | 9.00E-09 | 3 | Ccl7          |
| 0.555326901  | 0.000127272 | 9.53E-09 | 3 | Abcc3         |

|              |             |          |   |               |
|--------------|-------------|----------|---|---------------|
| 0.38923441   | 0.000129971 | 9.73E-09 | 3 | Lipa          |
| -0.40774171  | 0.000155894 | 1.17E-08 | 3 | Cd74          |
| 0.412568     | 0.000164469 | 1.23E-08 | 3 | Cd84          |
| -0.809013366 | 0.000179577 | 1.34E-08 | 3 | Vps37b        |
| 0.82072286   | 0.000193033 | 1.45E-08 | 3 | Adcy3         |
| 0.416670666  | 0.000196998 | 1.48E-08 | 3 | Rasgef1b      |
| 0.255441765  | 0.000220828 | 1.65E-08 | 3 | Itgb1         |
| 0.347215916  | 0.000252766 | 1.89E-08 | 3 | 5730416F02Rik |
| -1.251524914 | 0.000273238 | 2.05E-08 | 3 | Mgl2          |
| 0.562144609  | 0.000308628 | 2.31E-08 | 3 | Spryd7        |
| -1.623488131 | 0.000367822 | 2.75E-08 | 3 | C4b           |
| 0.570377835  | 0.00043636  | 3.27E-08 | 3 | Kcnn4         |
| 0.577899641  | 0.000484317 | 3.63E-08 | 3 | Slc7a7        |
| -1.028019988 | 0.000500736 | 3.75E-08 | 3 | Folr2         |
| 0.622463788  | 0.000543951 | 4.07E-08 | 3 | Ncapg2        |
| 0.487867462  | 0.000736268 | 5.51E-08 | 3 | 2010111I01Rik |
| 0.55670523   | 0.000888971 | 6.66E-08 | 3 | Ptchd1        |
| 0.294369042  | 0.001041681 | 7.80E-08 | 3 | Gngt2         |
| 0.513697397  | 0.001215259 | 9.10E-08 | 3 | Spn           |
| -1.032399612 | 0.001435702 | 1.08E-07 | 3 | Sema4a        |
| 0.44731359   | 0.00148721  | 1.11E-07 | 3 | Gpr137b       |
| 0.472222035  | 0.001515235 | 1.13E-07 | 3 | Apobr         |
| 0.522503349  | 0.001944483 | 1.46E-07 | 3 | Dnase11l      |
| 0.535108237  | 0.002370086 | 1.78E-07 | 3 | Prkaca        |
| -0.588472847 | 0.002407824 | 1.80E-07 | 3 | Ccl2          |
| 0.372995954  | 0.002477882 | 1.86E-07 | 3 | Igf1          |
| -0.851774976 | 0.00261284  | 1.96E-07 | 3 | Tmem176a      |
| 0.464567809  | 0.002863208 | 2.14E-07 | 3 | Lat2          |
| -0.582683341 | 0.002913656 | 2.18E-07 | 3 | Cfp           |
| 0.739498286  | 0.003135432 | 2.35E-07 | 3 | Slmap         |
| 0.635592505  | 0.003192103 | 2.39E-07 | 3 | Cx3cr1        |
| -1.019474027 | 0.003693322 | 2.77E-07 | 3 | Ccnd2         |
| 0.296179155  | 0.004060756 | 3.04E-07 | 3 | Aprt          |
| 0.576187008  | 0.004232244 | 3.17E-07 | 3 | Itgax         |
| -0.933179255 | 0.004369637 | 3.27E-07 | 3 | Gas6          |
| 0.497865237  | 0.004477666 | 3.35E-07 | 3 | Fbxo32        |
| 0.48770149   | 0.005839196 | 4.37E-07 | 3 | Tmcc3         |
| 0.556230616  | 0.005955736 | 4.46E-07 | 3 | Senp2         |
| -0.512197426 | 0.005984468 | 4.48E-07 | 3 | Sepp1         |
| -1.015558345 | 0.006892316 | 5.16E-07 | 3 | C3            |
| 0.484926932  | 0.006982463 | 5.23E-07 | 3 | Tmem189       |
| 0.317869312  | 0.007021579 | 5.26E-07 | 3 | Tuba1c        |
| 0.857492521  | 0.007472454 | 5.60E-07 | 3 | Vash1         |
| 0.601303331  | 0.007666162 | 5.74E-07 | 3 | Slc6a8        |
| -0.68608101  | 0.007670821 | 5.75E-07 | 3 | Zcchc11       |
| 0.351629167  | 0.008169865 | 6.12E-07 | 3 | Alcam         |
| 0.463504504  | 0.008607843 | 6.45E-07 | 3 | Nceh1         |
| 0.368071021  | 0.008668803 | 6.49E-07 | 3 | Furin         |
| 0.422192511  | 0.008978475 | 6.72E-07 | 3 | Myo1e         |
| 0.45796751   | 0.00940157  | 7.04E-07 | 3 | Stmn1         |
| 0.341007192  | 0.01077834  | 8.07E-07 | 3 | Vdac2         |
| 0.265325773  | 0.01080269  | 8.09E-07 | 3 | Fyb           |
| 0.602168814  | 0.013535358 | 1.01E-06 | 3 | Tmem71        |
| 0.282927939  | 0.013857714 | 1.04E-06 | 3 | Col4a3bp      |
| 0.478419959  | 0.014612096 | 1.09E-06 | 3 | Stk38l        |
| 0.369282306  | 0.014783997 | 1.11E-06 | 3 | Axl           |
| -1.147988732 | 0.014804984 | 1.11E-06 | 3 | Rnasel        |
| 0.325224229  | 0.014880214 | 1.11E-06 | 3 | Flna          |
| 0.483469607  | 0.015401718 | 1.15E-06 | 3 | Dlat          |
| 0.261673475  | 0.016306772 | 1.22E-06 | 3 | Abhd12        |
| 0.81868486   | 0.018588701 | 1.39E-06 | 3 | Speg          |

|              |             |          |   |            |
|--------------|-------------|----------|---|------------|
| 0.286543779  | 0.018726792 | 1.40E-06 | 3 | Gsn        |
| 0.56819218   | 0.019493932 | 1.46E-06 | 3 | Mdfic      |
| -1.257539884 | 0.020175357 | 1.51E-06 | 3 | Cp         |
| 0.45938483   | 0.020666817 | 1.55E-06 | 3 | Tars       |
| -0.829279355 | 0.02116184  | 1.58E-06 | 3 | Maf        |
| 0.478830579  | 0.022297843 | 1.67E-06 | 3 | Apbb2      |
| 0.42487726   | 0.025565824 | 1.91E-06 | 3 | Stx3       |
| -0.610641624 | 0.025848819 | 1.94E-06 | 3 | Ms4a6b     |
| 0.46700331   | 0.026266786 | 1.97E-06 | 3 | Asph       |
| 0.767878515  | 0.027104592 | 2.03E-06 | 3 | Slc35e4    |
| 0.392012666  | 0.027501419 | 2.06E-06 | 3 | Itga6      |
| 0.387883728  | 0.027579661 | 2.07E-06 | 3 | Fbxo3      |
| 0.366818959  | 0.031420005 | 2.35E-06 | 3 | Mmp12      |
| 0.355817368  | 0.032367964 | 2.42E-06 | 3 | Nucb1      |
| -0.585325807 | 0.032657457 | 2.45E-06 | 3 | Slc9a9     |
| 0.396654831  | 0.035151405 | 2.63E-06 | 3 | Gpr137b-ps |
| 0.28464376   | 0.037002883 | 2.77E-06 | 3 | Pld3       |
| 0.700117796  | 0.037269512 | 2.79E-06 | 3 | Igf2r      |
| 0.490172781  | 0.039845737 | 2.98E-06 | 3 | Tmem237    |
| -1.728786255 | 0.040237452 | 3.01E-06 | 3 | Lyve1      |
| 0.274457051  | 0.040469556 | 3.03E-06 | 3 | Reep5      |
| -0.48412812  | 0.041777397 | 3.13E-06 | 3 | Ccr2       |
| 0.415489104  | 0.042939217 | 3.22E-06 | 3 | Zfand2a    |
| -1.53714824  | 0.045099985 | 3.38E-06 | 3 | Tbc1d4     |
| 0.299516379  | 0.045760073 | 3.43E-06 | 3 | Lmna       |
| 0.361244747  | 0.046153638 | 3.46E-06 | 3 | Ndufb4     |
| -1.177623193 | 0.047037482 | 3.52E-06 | 3 | Fgfr1      |
| 0.393978195  | 0.048301626 | 3.62E-06 | 3 | Myof       |
| 0.353017424  | 0.048622215 | 3.64E-06 | 3 | Trp53inp2  |
| 0.369954624  | 0.050308429 | 3.77E-06 | 3 | Mapk3      |
| 0.716361591  | 0.050903922 | 3.81E-06 | 3 | Zfand2b    |
| 0.382202617  | 0.05233217  | 3.92E-06 | 3 | Cope       |
| -1.349422402 | 0.055531928 | 4.16E-06 | 3 | H2-Oa      |
| 0.762107511  | 0.060403847 | 4.52E-06 | 3 | D8Erttd82e |
| 0.331852097  | 0.068466477 | 5.13E-06 | 3 | Itgb5      |
| 0.656120788  | 0.069564402 | 5.21E-06 | 3 | Dtx4       |
| 0.437146027  | 0.070264209 | 5.26E-06 | 3 | Olfml3     |
| 0.48132071   | 0.071392523 | 5.35E-06 | 3 | Pik3cb     |
| 0.360603393  | 0.07217737  | 5.41E-06 | 3 | Kcmf1      |
| 0.616157819  | 0.07227185  | 5.41E-06 | 3 | Hivep3     |
| -1.275239848 | 0.072662301 | 5.44E-06 | 3 | Clec10a    |
| -0.750074484 | 0.07425419  | 5.56E-06 | 3 | Itsn1      |
| 0.449626273  | 0.074275112 | 5.56E-06 | 3 | Creb5      |
| -0.441989019 | 0.078249794 | 5.86E-06 | 3 | Ifitm2     |
| -0.65038721  | 0.081194325 | 6.08E-06 | 3 | Sidt2      |
| 0.650259583  | 0.085282505 | 6.39E-06 | 3 | Mmgt1      |
| 0.269688272  | 0.086030996 | 6.44E-06 | 3 | Uqcrb      |
| 0.688724389  | 0.091103709 | 6.82E-06 | 3 | Mmgt2      |
| 0.469925951  | 0.094901358 | 7.11E-06 | 3 | Slc37a2    |
| 0.538743218  | 0.095758539 | 7.17E-06 | 3 | Tle1       |
| -1.206517389 | 0.100595114 | 7.53E-06 | 3 | Ly6a       |
| 0.589100086  | 0.101787868 | 7.62E-06 | 3 | Lxn        |
| 0.543361754  | 0.112927285 | 8.46E-06 | 3 | Map7d1     |
| 0.526115317  | 0.112978274 | 8.46E-06 | 3 | Arhgap22   |
| 0.452940247  | 0.116738478 | 8.74E-06 | 3 | Tes        |
| 0.555021614  | 0.133121043 | 9.97E-06 | 3 | Al427809   |
| -0.787291367 | 0.133236213 | 9.98E-06 | 3 | Marcks11   |
| -1.357685141 | 0.14072466  | 1.05E-05 | 3 | Il1r2      |
| 0.680312387  | 0.151316692 | 1.13E-05 | 3 | Tpx2       |
| -1.246854228 | 0.153002002 | 1.15E-05 | 3 | Ltc4s      |
| 0.561368828  | 0.157703068 | 1.18E-05 | 3 | Vopp1      |

|              |             |          |   |               |
|--------------|-------------|----------|---|---------------|
| 0.282142433  | 0.168520627 | 1.26E-05 | 3 | Fam134b       |
| 0.330859371  | 0.169140936 | 1.27E-05 | 3 | Bcl2l1        |
| 0.268376356  | 0.170408417 | 1.28E-05 | 3 | Tspo          |
| 0.680225676  | 0.17265888  | 1.29E-05 | 3 | 2510009E07Rik |
| -0.631628812 | 0.173122492 | 1.30E-05 | 3 | H2-DMb1       |
| -0.934519523 | 0.175100624 | 1.31E-05 | 3 | Cbfa2t3       |
| -0.686267993 | 0.182801798 | 1.37E-05 | 3 | Clec4n        |
| 0.399164107  | 0.187239916 | 1.40E-05 | 3 | Cap1          |
| 0.602061823  | 0.187943772 | 1.41E-05 | 3 | Stap1         |
| 0.550599068  | 0.188763717 | 1.41E-05 | 3 | Daglb         |
| 0.275887861  | 0.198890023 | 1.49E-05 | 3 | Plekhm3       |
| 0.618283605  | 0.21189253  | 1.59E-05 | 3 | Arap3         |
| -0.809355037 | 0.213574403 | 1.60E-05 | 3 | Txnip         |
| 0.382331196  | 0.215389176 | 1.61E-05 | 3 | Iscu          |
| 0.340627096  | 0.222812252 | 1.67E-05 | 3 | Rnf111        |
| 0.315243727  | 0.229844939 | 1.72E-05 | 3 | Vdac1         |
| 0.338893551  | 0.235150796 | 1.76E-05 | 3 | 2410089E03Rik |
| 0.370277989  | 0.236582673 | 1.77E-05 | 3 | Pparg         |
| 0.349143793  | 0.24825633  | 1.86E-05 | 3 | Slc15a3       |
| 0.383921474  | 0.265099728 | 1.99E-05 | 3 | Zfp385a       |
| 0.432017517  | 0.267710426 | 2.01E-05 | 3 | Pilra         |
| 0.331935795  | 0.286913264 | 2.15E-05 | 3 | Adam17        |
| 0.431369441  | 0.291038434 | 2.18E-05 | 3 | AA467197      |
| 0.364133241  | 0.316029802 | 2.37E-05 | 3 | Dda1          |
| -1.210775721 | 0.328474946 | 2.46E-05 | 3 | Rcn3          |
| -0.292587129 | 0.329291405 | 2.47E-05 | 3 | Itgal         |
| -1.593861399 | 0.346704639 | 2.60E-05 | 3 | Cd163         |
| -0.852124589 | 0.348180906 | 2.61E-05 | 3 | Fam46a        |
| 0.481300475  | 0.361234443 | 2.71E-05 | 3 | Tmem109       |
| -0.678760082 | 0.376263479 | 2.82E-05 | 3 | P2ry10        |
| 0.32213421   | 0.379038125 | 2.84E-05 | 3 | Apobec1       |
| -1.077642292 | 0.380952395 | 2.85E-05 | 3 | Nr4a2         |
| 0.371923452  | 0.392613432 | 2.94E-05 | 3 | Ciz1          |
| 0.549775374  | 0.406195405 | 3.04E-05 | 3 | Trio          |
| 0.401977567  | 0.445368186 | 3.34E-05 | 3 | Slc39a10      |
| -0.407284837 | 0.445468881 | 3.34E-05 | 3 | Fcgr2b        |
| 0.613724274  | 0.466933611 | 3.50E-05 | 3 | Synj2         |
| 0.326167168  | 0.497960545 | 3.73E-05 | 3 | Csk           |
| -0.939064765 | 0.501857827 | 3.76E-05 | 3 | Ccr1          |
| -0.930460962 | 0.506006229 | 3.79E-05 | 3 | Bank1         |
| 0.30984823   | 0.517230978 | 3.87E-05 | 3 | Bcl2l11       |
| -0.492701454 | 0.553685872 | 4.15E-05 | 3 | Il1b          |
| 0.596996511  | 0.556467778 | 4.17E-05 | 3 | Manba         |
| 0.766148691  | 0.566174818 | 4.24E-05 | 3 | Rai14         |
| 0.49353684   | 0.604921868 | 4.53E-05 | 3 | Ercc6         |
| 0.407663216  | 0.63285859  | 4.74E-05 | 3 | Soga1         |
| 0.281756494  | 0.639740494 | 4.79E-05 | 3 | Hypk          |
| 0.363411017  | 0.643811406 | 4.82E-05 | 3 | Ap3s2         |
| -0.719777538 | 0.676672243 | 5.07E-05 | 3 | Plbd1         |
| -0.891439105 | 0.689571843 | 5.16E-05 | 3 | Igfbp4        |
| 0.556132388  | 0.708108999 | 5.30E-05 | 3 | L1cam         |
| 0.263488967  | 0.741902731 | 5.56E-05 | 3 | Aldoa         |
| 0.556150845  | 0.801503445 | 6.00E-05 | 3 | Kif13b        |
| -0.544293225 | 0.827339208 | 6.20E-05 | 3 | Btg2          |
| -0.932112642 | 0.841089036 | 6.30E-05 | 3 | Fcgrt         |
| 0.558429727  | 0.854892303 | 6.40E-05 | 3 | Rusc2         |
| 0.477867575  | 0.873501592 | 6.54E-05 | 3 | Map4k3        |
| -0.615286484 | 0.875490403 | 6.56E-05 | 3 | Egr1          |
| -1.313638077 | 0.885548998 | 6.63E-05 | 3 | Cmah          |
| 0.353482589  | 0.89088118  | 6.67E-05 | 3 | Mrpl13        |
| -0.283685539 | 0.929874315 | 6.96E-05 | 3 | Klf2          |

|              |             |           |   |               |
|--------------|-------------|-----------|---|---------------|
| 0.382119672  | 0.941510919 | 7.05E-05  | 3 | Prkcsh        |
| 0.647935514  | 1           | 8.10E-05  | 3 | Angptl2       |
| 0.275763846  | 1           | 8.32E-05  | 3 | Gdf15         |
| 0.306616362  | 1           | 8.34E-05  | 3 | Sap30         |
| 0.617611527  | 1           | 8.53E-05  | 3 | Tmem119       |
| -0.483584919 | 1           | 8.86E-05  | 3 | H2-T23        |
| 0.250423829  | 1           | 9.15E-05  | 3 | Sema4d        |
| 0.269459895  | 1           | 9.15E-05  | 3 | Ran           |
| 0.293596228  | 1           | 9.30E-05  | 3 | Mmp14         |
| -0.672983227 | 1           | 9.33E-05  | 3 | Aoah          |
| 0.309303394  | 1           | 9.62E-05  | 3 | Ywhag         |
| 0.324910224  | 1           | 9.74E-05  | 3 | Naa16         |
| 0.302346142  | 1           | 9.80E-05  | 3 | Ivns1abp      |
| -0.731393989 | 1           | 0.0001    | 3 | Slc15a2       |
| 0.314917619  | 1           | 0.000101  | 3 | Scarb2        |
| 0.505935508  | 1           | 0.0001052 | 3 | Fhl3          |
| 0.330372047  | 1           | 0.0001098 | 3 | Lyn           |
| 0.497959634  | 1           | 0.0001116 | 3 | Otulin        |
| 0.322981847  | 1           | 0.000113  | 3 | Hcfc1r1       |
| 0.317243412  | 1           | 0.0001147 | 3 | Rab20         |
| 0.593435971  | 1           | 0.0001196 | 3 | Klc4          |
| -0.453361977 | 1           | 0.0001234 | 3 | Ier3          |
| 0.410986339  | 1           | 0.0001258 | 3 | Srxn1         |
| 0.459953525  | 1           | 0.000127  | 3 | Scoc          |
| 0.39486629   | 1           | 0.000131  | 3 | Mrpl51        |
| 0.780490769  | 1           | 0.0001373 | 3 | 4931406P16Rik |
| 0.27713998   | 1           | 0.0001378 | 3 | Pitpnc1       |
| 0.311464448  | 1           | 0.0001388 | 3 | MIlf2         |
| -0.668514512 | 1           | 0.0001406 | 3 | Gda           |
| -0.340620309 | 1           | 0.0001416 | 3 | Serinc3       |
| 0.271365202  | 1           | 0.0001424 | 3 | Tec           |
| 0.257942725  | 1           | 0.0001425 | 3 | Psme3         |
| 0.252543826  | 1           | 0.0001432 | 3 | Spcs1         |
| 0.540730511  | 1           | 0.0001439 | 3 | Pdgfa         |
| 0.345138706  | 1           | 0.000144  | 3 | 4833439L19Rik |
| -1.593489845 | 1           | 0.0001455 | 3 | Ccr7          |
| 0.277381749  | 1           | 0.0001456 | 3 | Lair1         |
| 0.684618851  | 1           | 0.0001461 | 3 | Gyk           |
| 0.523388817  | 1           | 0.0001467 | 3 | Xylt2         |
| 0.541282736  | 1           | 0.0001535 | 3 | Col14a1       |
| 0.330468228  | 1           | 0.000154  | 3 | Lrpprc        |
| 0.305220541  | 1           | 0.0001552 | 3 | Ppt2          |
| -1.630533922 | 1           | 0.0001562 | 3 | Nkg7          |
| 0.271601834  | 1           | 0.00016   | 3 | Erbp2ip       |
| 0.277609494  | 1           | 0.0001727 | 3 | Anpep         |
| -0.657909649 | 1           | 0.0001764 | 3 | Tsc22d3       |
| 0.315192621  | 1           | 0.000185  | 3 | Rhoc          |
| 0.337948981  | 1           | 0.0001854 | 3 | Acsl4         |
| -0.347256596 | 1           | 0.0001878 | 3 | Cd36          |
| -0.651089682 | 1           | 0.0001965 | 3 | Stat4         |
| 0.860014575  | 1           | 0.0001995 | 3 | Nelfcd        |
| -1.472395617 | 1           | 0.0002027 | 3 | Ccl24         |
| 0.345475176  | 1           | 0.0002175 | 3 | Tor1aip1      |
| 0.357978966  | 1           | 0.000228  | 3 | Prdx4         |
| -0.618184142 | 1           | 0.0002302 | 3 | Dguok         |
| 0.304946182  | 1           | 0.0002311 | 3 | Ggh           |
| 0.258809445  | 1           | 0.0002425 | 3 | Capns1        |
| 0.275176653  | 1           | 0.0002442 | 3 | Hsd17b11      |
| 0.345287224  | 1           | 0.0002482 | 3 | Tns3          |
| -1.379788476 | 1           | 0.0002601 | 3 | Ednrb         |
| 0.571749059  | 1           | 0.0002632 | 3 | Abi3          |

|              |   |           |   |               |
|--------------|---|-----------|---|---------------|
| 0.271340612  | 1 | 0.0002652 | 3 | Uap1l1        |
| 0.383504371  | 1 | 0.0002666 | 3 | Gas2l3        |
| 0.25836232   | 1 | 0.0002674 | 3 | Lpxn          |
| -0.524357659 | 1 | 0.000268  | 3 | Ubn1          |
| 0.314256971  | 1 | 0.0002688 | 3 | Pmepa1        |
| -0.538886119 | 1 | 0.0002695 | 3 | Emb           |
| -0.502645358 | 1 | 0.000273  | 3 | Irf7          |
| 0.449275525  | 1 | 0.0002809 | 3 | Dbnidd2       |
| 0.43306726   | 1 | 0.0002836 | 3 | Msrb2         |
| 0.416930659  | 1 | 0.000286  | 3 | Ilkap         |
| 0.335301778  | 1 | 0.0003151 | 3 | Actn1         |
| 0.540381823  | 1 | 0.0003157 | 3 | Ppp2r1b       |
| 0.341363712  | 1 | 0.000318  | 3 | Camk2d        |
| 0.853613033  | 1 | 0.0003263 | 3 | Cenpe         |
| 0.252269864  | 1 | 0.0003307 | 3 | Med11         |
| 0.407116383  | 1 | 0.0003326 | 3 | Milr1         |
| 0.276567451  | 1 | 0.0003352 | 3 | Aga           |
| 0.616495338  | 1 | 0.0003386 | 3 | Shmt2         |
| 0.307113065  | 1 | 0.0003414 | 3 | Ank           |
| -1.129285685 | 1 | 0.0003438 | 3 | Plac8         |
| -0.962515788 | 1 | 0.0003496 | 3 | Hspa1b        |
| 0.488129569  | 1 | 0.0003519 | 3 | Mpp6          |
| 0.879760943  | 1 | 0.0003667 | 3 | Trim36        |
| 0.250017995  | 1 | 0.000372  | 3 | Spg7          |
| -0.491529702 | 1 | 0.0003792 | 3 | Klf4          |
| 0.312318283  | 1 | 0.0003816 | 3 | Aldh9a1       |
| 0.58827074   | 1 | 0.0003889 | 3 | Ermp1         |
| -0.426424214 | 1 | 0.0003932 | 3 | Rsb1          |
| 0.354690837  | 1 | 0.0003949 | 3 | Eif3g         |
| -0.661974181 | 1 | 0.0003953 | 3 | P2ry12        |
| 0.895579432  | 1 | 0.0003975 | 3 | Prc1          |
| 0.379242774  | 1 | 0.0004084 | 3 | Fam86         |
| 0.312942972  | 1 | 0.0004265 | 3 | Tsg101        |
| -0.595778617 | 1 | 0.0004383 | 3 | Wdr41         |
| 0.28959425   | 1 | 0.0004436 | 3 | Mdm2          |
| 0.297833604  | 1 | 0.0004487 | 3 | Hpgds         |
| 0.482174356  | 1 | 0.0004495 | 3 | 2510003E04Rik |
| -0.606840052 | 1 | 0.0004683 | 3 | Prpf39        |
| -0.689340387 | 1 | 0.0004695 | 3 | Mthfr         |
| 0.486143665  | 1 | 0.0004754 | 3 | Psmg2         |
| -0.668379113 | 1 | 0.0004897 | 3 | Tns1          |
| 0.273117989  | 1 | 0.0005123 | 3 | Anxa3         |
| -0.561527953 | 1 | 0.0005183 | 3 | Trps1         |
| 0.256471096  | 1 | 0.000527  | 3 | Cpeb2         |
| -0.657059849 | 1 | 0.0005285 | 3 | Ago1          |
| 0.300808502  | 1 | 0.0005349 | 3 | Hp1bp3        |
| -1.443245581 | 1 | 0.000542  | 3 | F10           |
| 0.407836785  | 1 | 0.0005467 | 3 | Cox20         |
| 0.40604849   | 1 | 0.0005646 | 3 | Extl3         |
| 0.277314702  | 1 | 0.0005705 | 3 | Hadh          |
| -0.415540985 | 1 | 0.0005708 | 3 | Jun           |
| -1.116906588 | 1 | 0.0005711 | 3 | Fcna          |
| 0.480568291  | 1 | 0.0005785 | 3 | Pkp4          |
| -0.371618191 | 1 | 0.0005858 | 3 | Fam117b       |
| 0.337985509  | 1 | 0.0005956 | 3 | Exoc2         |
| 0.370351715  | 1 | 0.0006034 | 3 | Arap1         |
| 0.444943098  | 1 | 0.0006352 | 3 | Bmyc          |
| 0.432965852  | 1 | 0.0006534 | 3 | Exoc6b        |
| 0.41191883   | 1 | 0.000654  | 3 | Xpo1          |
| 0.362551267  | 1 | 0.0006557 | 3 | Coro2a        |
| 0.478705166  | 1 | 0.000658  | 3 | Clk4          |



|              |   |           |   |          |
|--------------|---|-----------|---|----------|
| -0.662133505 | 1 | 0.0006632 | 3 | Ccl12    |
| -0.527944707 | 1 | 0.0006831 | 3 | Cdk11b   |
| 0.437776154  | 1 | 0.0006834 | 3 | Mvb12b   |
| 0.265863972  | 1 | 0.0006892 | 3 | Ppp1r18  |
| 0.36819791   | 1 | 0.0006957 | 3 | Yme1l1   |
| -0.797983358 | 1 | 0.0007083 | 3 | Dennd1c  |
| -0.453035667 | 1 | 0.0007272 | 3 | Pfkfb3   |
| 0.287059926  | 1 | 0.0007282 | 3 | Galnt7   |
| -0.895940045 | 1 | 0.0007312 | 3 | Gimap6   |
| 0.41324397   | 1 | 0.0007405 | 3 | G6pdx    |
| 0.30088553   | 1 | 0.0007526 | 3 | Park7    |
| -1.180809438 | 1 | 0.0007533 | 3 | Apoe     |
| 0.459551942  | 1 | 0.0007706 | 3 | Acp1     |
| 0.398383459  | 1 | 0.0007864 | 3 | Spn      |
| -0.530921376 | 1 | 0.0007927 | 3 | Dgat1    |
| 0.368919933  | 1 | 0.000797  | 3 | Pon2     |
| 0.520522265  | 1 | 0.0008106 | 3 | Tpm1     |
| -1.175275567 | 1 | 0.0008164 | 3 | Fxyd2    |
| 0.366106214  | 1 | 0.0008206 | 3 | Npc1     |
| 0.505441589  | 1 | 0.0008233 | 3 | Zranb1   |
| 0.252895454  | 1 | 0.000844  | 3 | Tspan31  |
| 0.276800996  | 1 | 0.0008529 | 3 | Cdip1    |
| 0.649322297  | 1 | 0.0008623 | 3 | Ifnar1   |
| 0.330726962  | 1 | 0.0008714 | 3 | Rnf6     |
| 0.550412209  | 1 | 0.0008737 | 3 | Bcap29   |
| -0.655429477 | 1 | 0.0008808 | 3 | Ap2a2    |
| 0.420164605  | 1 | 0.0008955 | 3 | F11r     |
| 0.458713558  | 1 | 0.0008977 | 3 | Tmem55a  |
| 0.335216322  | 1 | 0.0009272 | 3 | Cd300lb  |
| 0.49544241   | 1 | 0.0009424 | 3 | Tpgs1    |
| 0.264639727  | 1 | 0.0009503 | 3 | Psma6    |
| 0.447004148  | 1 | 0.0009846 | 3 | Tnfaip1  |
| 0.379717454  | 1 | 0.0009919 | 3 | Atxn1    |
| -0.711708955 | 1 | 0.000998  | 3 | Cysltr1  |
| -0.489251462 | 1 | 0.0010284 | 3 | Atxn7    |
| 0.408674312  | 1 | 0.0010436 | 3 | Pdlim4   |
| -0.812900538 | 1 | 0.0010532 | 3 | Rcsd1    |
| -1.074732321 | 1 | 0.0010696 | 3 | Oas2     |
| 0.402543325  | 1 | 0.0010831 | 3 | Tnlp1    |
| 0.360560529  | 1 | 0.0011141 | 3 | Fibp     |
| -0.455310407 | 1 | 0.0011243 | 3 | Crem     |
| 0.294528008  | 1 | 0.0011331 | 3 | Slc25a39 |
| 0.298464993  | 1 | 0.00117   | 3 | Tmbim4   |
| 0.330735185  | 1 | 0.0011842 | 3 | Spsb2    |
| 0.685008535  | 1 | 0.0011891 | 3 | Nedd4l   |
| -0.503081205 | 1 | 0.0011931 | 3 | Tmem173  |
| 0.450785311  | 1 | 0.0011985 | 3 | Znrf1    |
| 0.33933269   | 1 | 0.0012005 | 3 | Eif2a    |
| 0.456038264  | 1 | 0.0012162 | 3 | Wdr74    |
| 0.321624372  | 1 | 0.0012171 | 3 | Ppm1g    |
| 0.372820661  | 1 | 0.0012293 | 3 | Dhrs1    |
| 0.362762782  | 1 | 0.0012302 | 3 | Cdk14    |
| 0.358650332  | 1 | 0.0012336 | 3 | Ebi3     |
| 0.350391821  | 1 | 0.0012464 | 3 | Slc2a1   |
| -0.556119108 | 1 | 0.0012644 | 3 | Mndal    |
| 0.385826955  | 1 | 0.0012775 | 3 | Rffl     |
| 0.304064575  | 1 | 0.0012828 | 3 | Klhdc10  |
| 0.400621423  | 1 | 0.0012995 | 3 | Pik3ca   |
| 0.381354315  | 1 | 0.0013243 | 3 | Ilgav    |
| 0.351698316  | 1 | 0.001361  | 3 | Abcd1    |
| 0.359263953  | 1 | 0.0013803 | 3 | Calu     |

|              |   |           |   |         |
|--------------|---|-----------|---|---------|
| -0.526752268 | 1 | 0.0014063 | 3 | Zfp445  |
| 0.66646679   | 1 | 0.0014157 | 3 | Mki67   |
| -0.418506757 | 1 | 0.0014187 | 3 | Slfn5   |
| -0.86067023  | 1 | 0.0014551 | 3 | Ahr     |
| 0.281666558  | 1 | 0.0014608 | 3 | Csnk1e  |
| -0.855330709 | 1 | 0.0014633 | 3 | Agtrap  |
| 0.36653908   | 1 | 0.001484  | 3 | Hmgn5   |
| 0.331572271  | 1 | 0.0015012 | 3 | Zbtb21  |
| 0.352116736  | 1 | 0.0015039 | 3 | Pisd    |
| 0.369896049  | 1 | 0.0015689 | 3 | Brcc3   |
| -0.295036266 | 1 | 0.0015808 | 3 | Jund    |
| -0.749404355 | 1 | 0.0015848 | 3 | Gm1966  |
| -0.77301874  | 1 | 0.0016052 | 3 | Morc3   |
| 0.600413623  | 1 | 0.0016371 | 3 | Phb     |
| 0.276421599  | 1 | 0.0016387 | 3 | Adam8   |
| 0.410882859  | 1 | 0.0016425 | 3 | Frrs1   |
| 0.547259562  | 1 | 0.0016507 | 3 | Mak16   |
| 0.277869276  | 1 | 0.0016532 | 3 | Gnl2    |
| -0.29071773  | 1 | 0.0016557 | 3 | Srrm2   |
| 0.328447573  | 1 | 0.0016574 | 3 | Wdr83os |
| 0.317628987  | 1 | 0.0017275 | 3 | Cgrrf1  |
| 0.273624726  | 1 | 0.0017749 | 3 | Rnf5    |
| 0.302057956  | 1 | 0.0017957 | 3 | Pfkip   |
| -0.695603529 | 1 | 0.0018494 | 3 | Hilpda  |
| 0.271346752  | 1 | 0.0018613 | 3 | Vps28   |
| -0.49387628  | 1 | 0.001868  | 3 | Clec7a  |
| 0.324652347  | 1 | 0.0018728 | 3 | Prnp    |
| -0.48973289  | 1 | 0.0019087 | 3 | Bbip1   |
| 0.456871923  | 1 | 0.0019192 | 3 | Pdcd10  |
| 0.431691135  | 1 | 0.0019581 | 3 | Fbxw7   |
| -0.604399133 | 1 | 0.0019679 | 3 | Alox5   |
| 0.424524417  | 1 | 0.0019937 | 3 | Wdr11   |
| 0.266915241  | 1 | 0.0020127 | 3 | Dpysl2  |
| 0.267079049  | 1 | 0.0020158 | 3 | Scp2    |
| -0.441812807 | 1 | 0.0020189 | 3 | Il4ra   |
| 0.561475113  | 1 | 0.0020196 | 3 | Fgd4    |
| 0.297474795  | 1 | 0.002062  | 3 | Snx17   |
| 0.251222197  | 1 | 0.0020818 | 3 | Fndc3b  |
| -0.64165411  | 1 | 0.0020818 | 3 | Lbr     |
| -0.27839807  | 1 | 0.0020933 | 3 | Igsf6   |
| -0.712097616 | 1 | 0.0021151 | 3 | Cd33    |
| 0.473134839  | 1 | 0.0021222 | 3 | Ppp2r5e |
| 0.264795003  | 1 | 0.0021628 | 3 | Map3k2  |
| -0.279123237 | 1 | 0.0021635 | 3 | Chd7    |
| -0.272675881 | 1 | 0.0021956 | 3 | Srgn    |
| -0.608786356 | 1 | 0.0022768 | 3 | Hpgd    |
| 0.440520482  | 1 | 0.0022821 | 3 | Vps18   |
| -0.800776267 | 1 | 0.0023081 | 3 | Dok2    |
| -0.501796201 | 1 | 0.0023168 | 3 | Top2b   |
| 0.337887998  | 1 | 0.0023176 | 3 | Fbxo11  |
| 0.343642084  | 1 | 0.0023631 | 3 | Slain2  |
| 0.316762796  | 1 | 0.0023868 | 3 | Eif2b2  |
| 0.545627546  | 1 | 0.0024246 | 3 | Cd180   |
| 0.254852215  | 1 | 0.002428  | 3 | Kansl1  |
| 0.284190418  | 1 | 0.0024446 | 3 | Gart    |
| -0.396935195 | 1 | 0.0025016 | 3 | H2afj   |
| -0.521638988 | 1 | 0.0025325 | 3 | Zc3hav1 |
| -0.658273931 | 1 | 0.0025427 | 3 | Ier2    |
| 0.587076988  | 1 | 0.0025612 | 3 | Top2a   |
| 0.597892014  | 1 | 0.0026234 | 3 | Vps16   |
| -0.409569576 | 1 | 0.0026618 | 3 | Zcchc6  |

|              |   |           |   |            |        |
|--------------|---|-----------|---|------------|--------|
| -0.728992919 | 1 | 0.0026881 | 3 | Arsb       |        |
| 0.373623868  | 1 | 0.0027028 | 3 | Tbc1d9b    |        |
| -0.576137124 | 1 | 0.0027079 | 3 | Cd24a      |        |
| 0.415954806  | 1 | 0.0027302 | 3 | Sntb2      |        |
| 0.276489446  | 1 | 0.0027351 | 3 | Ostm1      |        |
| 0.41124648   | 1 | 0.0027369 | 3 | Tpcn1      |        |
| 0.332418003  | 1 | 0.0027458 | 3 | Plec       |        |
| -0.57237035  | 1 | 0.002755  | 3 | Snhg8      |        |
| 0.74234908   | 1 | 0.0028768 | 3 | Kat7       |        |
| 0.288020685  | 1 | 0.0029195 | 3 | Dnmt3a     |        |
| 0.478051546  | 1 | 0.0029338 | 3 | Lrp12      |        |
| -0.265135066 | 1 | 0.0029453 | 3 | Pnrc1      |        |
| 0.409936555  | 1 | 0.0029661 | 3 | Akap8l     |        |
| 0.366243271  | 1 | 0.0030516 | 3 | Farsb      |        |
| 0.720611599  | 1 | 0.0030994 | 3 | BC005624   |        |
| 0.406673207  | 1 | 0.003186  | 3 | Enoph1     |        |
| 0.265671775  | 1 | 0.0032072 | 3 | Serf2      |        |
| 0.377169969  | 1 | 0.0032367 | 3 | Htatsf1    |        |
| -0.357764997 | 1 | 0.0033085 | 3 | Gbp3       |        |
| 0.442136473  | 1 | 0.0033238 | 3 | Myo9b      |        |
| 0.404877875  | 1 | 0.0034422 | 3 | Lap3       |        |
| 0.457989448  | 1 | 0.0034681 | 3 | Dynlt3     |        |
| 0.33775894   | 1 | 0.0035702 | 3 | Topbp1     |        |
| 0.297956584  | 1 | 0.0036206 | 3 | U2af1l4    |        |
| 0.315976152  | 1 | 0.0036374 | 3 | Uba52      |        |
| 0.271733241  | 1 | 0.0036957 | 3 | Cuedc2     |        |
| -0.721122168 | 1 | 0.003706  | 3 | AW112010   |        |
| 0.265447609  | 1 | 0.0037553 | 3 | Hmg20b     |        |
| 0.291918938  | 1 | 0.0037569 | 3 | Paip2      |        |
| 0.252930169  | 1 | 0.0038895 | 3 | Rab1b      |        |
| -0.304711231 | 1 | 0.0038925 | 3 | Tsyp1l     |        |
| 0.27602774   | 1 | 0.0038934 | 3 | Dhps       |        |
| -0.650543025 | 1 | 0.0038946 | 3 | Gbp7       |        |
| -0.365348621 | 1 | 0.0039047 | 3 | Nktr       |        |
| 0.469462667  | 1 | 0.0039467 | 3 | Mtx1       |        |
| 0.308099999  | 1 | 0.0040722 | 3 | Med8       |        |
| -0.438630242 | 1 | 0.0040786 | 3 | Cnp        |        |
| 0.32747885   | 1 | 0.0040856 | 3 | Hibadh     |        |
| -0.393712721 | 1 | 0.004092  | 3 | Abcf3      |        |
| 0.503821156  | 1 | 0.0041215 | 3 | Ptgr1      |        |
| 0.338007186  | 1 | 0.0041237 | 3 | Slc9a1     |        |
| 0.329899427  | 1 | 0.0041352 | 3 | Cnot6      |        |
| 0.310305225  | 1 | 0.0041599 | 3 | Dync1i2    |        |
| 0.319313851  | 1 | 0.0041867 | 3 | Arid1b     |        |
| 0.710042883  | 1 | 0.0042278 | 3 | Gdf3       |        |
| 0.332902105  | 1 | 0.0043177 | 3 | Ccdc23     |        |
| 0.506628966  | 1 | 0.0043476 | 3 | Thoc5      |        |
| 0.335662225  | 1 | 0.0043832 | 3 | Atp8a1     |        |
| -0.29047103  | 1 | 0.0044063 | 3 | Gadd45gip1 |        |
| 0.346040821  | 1 | 0.0044714 | 3 | Ramp1      |        |
| 0.250693324  | 1 | 0.0045163 | 3 | Yipf4      |        |
| -0.620497534 | 1 | 0.0045687 | 3 | Ahsa2      |        |
| -0.286279077 | 1 | 0.0045716 | 3 | Snx2       |        |
| 0.36294712   | 1 | 0.0046047 | 3 |            | Mar.05 |
| -0.472244475 | 1 | 0.0046776 | 3 | Batf3      |        |
| -0.488608451 | 1 | 0.004699  | 3 | St8sia4    |        |
| 0.287523308  | 1 | 0.0048208 | 3 | S100a13    |        |
| -0.456154975 | 1 | 0.0048405 | 3 | Snrpa1     |        |
| -0.347434802 | 1 | 0.0049703 | 3 | Anxa6      |        |
| -0.496244498 | 1 | 0.0049862 | 3 | Gas7       |        |
| 0.282677394  | 1 | 0.0049958 | 3 | Adam9      |        |

|              |   |           |   |           |
|--------------|---|-----------|---|-----------|
| 0.299322408  | 1 | 0.0050862 | 3 | Lyst      |
| 0.36983742   | 1 | 0.0051096 | 3 | Fmnl3     |
| 0.313806857  | 1 | 0.0051772 | 3 | Ubap1     |
| 0.250786502  | 1 | 0.0052245 | 3 | Emc7      |
| -0.363794296 | 1 | 0.0052298 | 3 | Map3k14   |
| -0.39999679  | 1 | 0.0052937 | 3 | Clec4a2   |
| 0.294801919  | 1 | 0.0056317 | 3 | Ccni      |
| -0.345991082 | 1 | 0.0056407 | 3 | Cd97      |
| 0.280235118  | 1 | 0.0056508 | 3 | Gab2      |
| -0.577873289 | 1 | 0.0056694 | 3 | Epsti1    |
| -0.30748277  | 1 | 0.0056858 | 3 | Tmem176b  |
| -1.362999246 | 1 | 0.0058224 | 3 | Ifitm1    |
| -0.448026914 | 1 | 0.005831  | 3 | Tmem141   |
| 0.296117817  | 1 | 0.005846  | 3 | Ap3b1     |
| -0.529813862 | 1 | 0.0058692 | 3 | Pisd-ps1  |
| -0.266887073 | 1 | 0.00599   | 3 | Efr3a     |
| -0.56374884  | 1 | 0.0060188 | 3 | Samm50    |
| 0.327689594  | 1 | 0.0060937 | 3 | Trim47    |
| 0.284144512  | 1 | 0.0060985 | 3 | Arhgap17  |
| -0.54821883  | 1 | 0.0061222 | 3 | Oas1a     |
| 0.306509415  | 1 | 0.0061261 | 3 | Sgcb      |
| -0.503721938 | 1 | 0.0061913 | 3 | Dusp7     |
| 0.611723237  | 1 | 0.0062069 | 3 | Adap1     |
| 0.263783868  | 1 | 0.006246  | 3 | Sirt7     |
| -0.46404394  | 1 | 0.0062482 | 3 | Malt1     |
| -0.433336495 | 1 | 0.0063753 | 3 | Atf7ip    |
| 0.439036787  | 1 | 0.0065844 | 3 | Cops8     |
| -0.789681011 | 1 | 0.0066073 | 3 | Itgb7     |
| 0.271343533  | 1 | 0.0066219 | 3 | Samd8     |
| 0.256050766  | 1 | 0.0066599 | 3 | Hpcal1    |
| -0.352034964 | 1 | 0.0070635 | 3 | Tiparp    |
| 0.274232289  | 1 | 0.0070688 | 3 | Paics     |
| 0.270433642  | 1 | 0.0071292 | 3 | Gpatch11  |
| 0.278526486  | 1 | 0.0072156 | 3 | Dapk1     |
| 0.310198885  | 1 | 0.0073209 | 3 | Atp2b4    |
| -0.474598929 | 1 | 0.0073232 | 3 | Rgl1      |
| 0.260036824  | 1 | 0.0073716 | 3 | Ctnnbp2nl |
| -0.287563913 | 1 | 0.0073988 | 3 | Kbtbd2    |
| -0.325703959 | 1 | 0.0076355 | 3 | Itga4     |
| -0.297479055 | 1 | 0.0076606 | 3 | Kctd12    |
| 0.664739422  | 1 | 0.0076606 | 3 | Zufsp     |
| 0.402296693  | 1 | 0.0076797 | 3 | Fam214b   |
| 0.277434003  | 1 | 0.0076943 | 3 | Klhl6     |
| 0.342801653  | 1 | 0.0078693 | 3 | Supt20    |
| -0.821981546 | 1 | 0.0079117 | 3 | Birc2     |
| 0.314912781  | 1 | 0.0079252 | 3 | Thumppd3  |
| -0.659046711 | 1 | 0.0079967 | 3 | Stat2     |
| -0.749136601 | 1 | 0.0080136 | 3 | Lifr      |
| 0.296255129  | 1 | 0.008209  | 3 | Fblim1    |
| 0.277563427  | 1 | 0.0082152 | 3 | Prr3      |
| 0.395382548  | 1 | 0.0082712 | 3 | Mrps26    |
| -0.435188608 | 1 | 0.0083213 | 3 | Aftph     |
| 0.489043825  | 1 | 0.0083537 | 3 | Bap1      |
| -0.383339559 | 1 | 0.0084435 | 3 | Wrn       |
| 0.253199699  | 1 | 0.0084533 | 3 | Atp6v1d   |
| -0.604731371 | 1 | 0.008533  | 3 | Rtp4      |
| -0.382601485 | 1 | 0.0085999 | 3 | Sde2      |
| 0.358170831  | 1 | 0.0087778 | 3 | Mpv17     |
| -1.058574471 | 1 | 0.0088709 | 3 | Cd209a    |
| 0.409522347  | 1 | 0.0089325 | 3 | Rhbdf2    |
| 0.288853757  | 1 | 0.0089713 | 3 | Dhx30     |

|              |          |           |   |               |
|--------------|----------|-----------|---|---------------|
| -0.378742659 | 1        | 0.0089882 | 3 | Sft2d2        |
| 0.310655295  | 1        | 0.0090334 | 3 | Emc3          |
| 0.327186481  | 1        | 0.009118  | 3 | Zmat2         |
| -0.435920821 | 1        | 0.0091656 | 3 | Sp140         |
| -0.389706775 | 1        | 0.0092008 | 3 | Slc12a7       |
| 0.300401421  | 1        | 0.0092143 | 3 | Tmem206       |
| 0.356119675  | 1        | 0.0092151 | 3 | Smarca4       |
| 0.34124951   | 1        | 0.0092823 | 3 | Psen2         |
| -0.294091841 | 1        | 0.0093074 | 3 | Marcks        |
| 0.258594536  | 1        | 0.0093445 | 3 | Pyurf         |
| -0.699506794 | 1        | 0.0093992 | 3 | Sorbs3        |
| -0.644496344 | 1        | 0.0094933 | 3 | Riok1         |
| -0.485549209 | 1        | 0.0095852 | 3 | Nfxl1         |
| -0.492442667 | 1        | 0.0096615 | 3 | Snhg12        |
| 0.271786216  | 1        | 0.0096751 | 3 | Plekhn2       |
| 0.557441946  | 1        | 0.0098542 | 3 | Pde8a         |
| -0.343818859 | 1        | 0.009908  | 3 | Ist1          |
| 0.258665334  | 1        | 0.0099458 | 3 | Wdr91         |
| 1.561685081  | 3.97E-44 | 2.97E-48  | 4 | L1cam         |
| 1.007600775  | 1.79E-43 | 1.34E-47  | 4 | Disp1         |
| 1.185419396  | 6.02E-37 | 4.51E-41  | 4 | Aasdhppt      |
| 1.461880036  | 4.95E-33 | 3.71E-37  | 4 | Hsd11b1       |
| 0.84455724   | 5.90E-30 | 4.42E-34  | 4 | Sccpdh        |
| 1.834560724  | 9.51E-30 | 7.12E-34  | 4 | Atrip         |
| 1.480771761  | 2.72E-29 | 2.04E-33  | 4 | Setmar        |
| 1.560568471  | 1.93E-28 | 1.44E-32  | 4 | Kdm2b         |
| 0.86635699   | 2.97E-28 | 2.22E-32  | 4 | Ttll1         |
| 1.042367105  | 3.53E-28 | 2.65E-32  | 4 | Tbc1d2        |
| 1.188601142  | 4.59E-28 | 3.44E-32  | 4 | Terf2ip       |
| 1.319559079  | 5.95E-27 | 4.46E-31  | 4 | Zfp580        |
| 0.967031737  | 2.44E-25 | 1.82E-29  | 4 | Enox2         |
| 0.785362131  | 5.66E-25 | 4.24E-29  | 4 | Ldlrap1       |
| 1.054570887  | 9.03E-25 | 6.76E-29  | 4 | Acs1          |
| 1.024816176  | 6.04E-23 | 4.52E-27  | 4 | Zbtb42        |
| 0.995013413  | 9.41E-23 | 7.05E-27  | 4 | Creb3l2       |
| 1.247838326  | 1.00E-22 | 7.53E-27  | 4 | Nudt14        |
| 0.776497206  | 1.10E-22 | 8.20E-27  | 4 | Osbpl1a       |
| 1.76296599   | 1.38E-22 | 1.04E-26  | 4 | Lrp8          |
| 1.057134795  | 1.78E-22 | 1.33E-26  | 4 | Irak3         |
| 1.300746819  | 2.21E-22 | 1.66E-26  | 4 | Lym1          |
| 0.95083067   | 2.50E-22 | 1.87E-26  | 4 | 2310061104Rik |
| 1.047105005  | 4.43E-22 | 3.32E-26  | 4 | Snx20         |
| 1.294397215  | 5.12E-22 | 3.83E-26  | 4 | Spn           |
| 0.777076397  | 1.18E-21 | 8.80E-26  | 4 | Itpr3         |
| 1.457445781  | 3.41E-21 | 2.55E-25  | 4 | Dnase1l3      |
| 0.847738706  | 1.22E-20 | 9.11E-25  | 4 | Mrps18a       |
| 1.13777006   | 1.42E-20 | 1.07E-24  | 4 | Nes           |
| 0.955696768  | 3.94E-20 | 2.95E-24  | 4 | Tspan4        |
| 0.812828997  | 7.92E-20 | 5.93E-24  | 4 | Pde8a         |
| 0.710831662  | 9.42E-20 | 7.06E-24  | 4 | Ttc28         |
| 1.176266163  | 1.37E-19 | 1.03E-23  | 4 | Med9          |
| 1.033957819  | 2.84E-19 | 2.13E-23  | 4 | Idh3g         |
| 0.876826511  | 3.70E-19 | 2.77E-23  | 4 | Cxcr3         |
| 0.579421464  | 4.42E-19 | 3.31E-23  | 4 | Zfp74         |
| 1.151905779  | 6.82E-19 | 5.11E-23  | 4 | Pdlim7        |
| 0.972723638  | 7.50E-19 | 5.62E-23  | 4 | Tnip1         |
| 0.798520822  | 7.80E-19 | 5.84E-23  | 4 | Gamt          |
| 1.271160125  | 1.48E-18 | 1.10E-22  | 4 | Mkl2          |
| 0.832245313  | 1.78E-18 | 1.33E-22  | 4 | Prkra         |
| 1.411930473  | 2.42E-18 | 1.82E-22  | 4 | 4931428F04Rik |
| 0.780607828  | 3.26E-18 | 2.44E-22  | 4 | Golga1        |

|              |          |          |   |               |
|--------------|----------|----------|---|---------------|
| 0.865678636  | 6.84E-18 | 5.12E-22 | 4 | 1600020E01Rik |
| 1.07256112   | 9.09E-18 | 6.80E-22 | 4 | Alg3          |
| 0.84183796   | 9.20E-18 | 6.89E-22 | 4 | Ammecr1       |
| 1.846137507  | 1.10E-17 | 8.22E-22 | 4 | Apoc2         |
| 0.625812192  | 1.80E-17 | 1.35E-21 | 4 | Gemin4        |
| 0.783454975  | 3.95E-17 | 2.96E-21 | 4 | Polr1a        |
| 1.459291186  | 4.93E-17 | 3.69E-21 | 4 | Pkd2          |
| 0.852048003  | 5.14E-17 | 3.85E-21 | 4 | Tomm70a       |
| 0.712745539  | 5.62E-17 | 4.21E-21 | 4 | Cxcl1         |
| 0.454719676  | 5.89E-17 | 4.41E-21 | 4 | Rrm2b         |
| 0.904363311  | 6.24E-17 | 4.67E-21 | 4 | Nenf          |
| 0.759819746  | 9.99E-17 | 7.48E-21 | 4 | Cd72          |
| 0.68193518   | 1.21E-16 | 9.08E-21 | 4 | Cep170b       |
| 1.123011424  | 1.58E-16 | 1.18E-20 | 4 | Gm5547        |
| 0.772946715  | 1.70E-16 | 1.28E-20 | 4 | Plekha1       |
| 0.776600895  | 2.03E-16 | 1.52E-20 | 4 | Gcc2          |
| 1.034205576  | 2.05E-16 | 1.54E-20 | 4 | Myo1e         |
| -1.045112379 | 2.67E-16 | 2.00E-20 | 4 | Gm1821        |
| 1.076779082  | 2.72E-16 | 2.04E-20 | 4 | Ptchd1        |
| 1.172020017  | 2.81E-16 | 2.11E-20 | 4 | Ppp1r13l      |
| 0.68640999   | 2.84E-16 | 2.12E-20 | 4 | Polr3a        |
| 1.056404797  | 3.21E-16 | 2.40E-20 | 4 | Tmem159       |
| 0.68205099   | 3.38E-16 | 2.53E-20 | 4 | 2810002D19Rik |
| 0.804264328  | 3.45E-16 | 2.59E-20 | 4 | Dhrs4         |
| 1.460754409  | 3.89E-16 | 2.91E-20 | 4 | Smox          |
| -0.760963512 | 5.01E-16 | 3.75E-20 | 4 | Pfn1          |
| 1.081140362  | 5.97E-16 | 4.47E-20 | 4 | Snx9          |
| 0.951344503  | 6.24E-16 | 4.68E-20 | 4 | Gdpd1         |
| 1.718862111  | 7.88E-16 | 5.90E-20 | 4 | Bik           |
| 1.032211108  | 8.66E-16 | 6.49E-20 | 4 | Fadd          |
| 0.780262045  | 9.03E-16 | 6.76E-20 | 4 | Mrps24        |
| 0.839058353  | 1.19E-15 | 8.90E-20 | 4 | Ndrp1         |
| 0.703862908  | 1.27E-15 | 9.53E-20 | 4 | Qdpr          |
| 1.158348757  | 1.31E-15 | 9.78E-20 | 4 | Angptl2       |
| 1.393494842  | 1.60E-15 | 1.20E-19 | 4 | Atg9a         |
| 0.804206096  | 1.76E-15 | 1.32E-19 | 4 | Atg2b         |
| 0.6076209    | 1.87E-15 | 1.40E-19 | 4 | Suox          |
| 1.011772032  | 1.94E-15 | 1.45E-19 | 4 | Atp2b4        |
| 0.76424665   | 2.09E-15 | 1.56E-19 | 4 | Ptafr         |
| 1.014832292  | 2.12E-15 | 1.59E-19 | 4 | Htr2b         |
| 1.122017275  | 2.15E-15 | 1.61E-19 | 4 | Apbb2         |
| 1.417387099  | 2.68E-15 | 2.01E-19 | 4 | Cep97         |
| 0.769000421  | 3.14E-15 | 2.35E-19 | 4 | Glipr1        |
| 1.044637463  | 3.52E-15 | 2.64E-19 | 4 | Slc39a11      |
| 0.740854708  | 4.13E-15 | 3.10E-19 | 4 | Sec24b        |
| 0.48071925   | 4.16E-15 | 3.12E-19 | 4 | Clec4b1       |
| 0.790448957  | 4.19E-15 | 3.14E-19 | 4 | Itgax         |
| 0.924238473  | 5.01E-15 | 3.75E-19 | 4 | Pdlim2        |
| 0.539198928  | 5.10E-15 | 3.82E-19 | 4 | Pot1a         |
| 0.821372199  | 5.33E-15 | 3.99E-19 | 4 | Clec4d        |
| 0.614366887  | 5.95E-15 | 4.45E-19 | 4 | Ltn1          |
| 0.440667969  | 6.04E-15 | 4.52E-19 | 4 | Taf5l         |
| 0.830437867  | 7.95E-15 | 5.95E-19 | 4 | Cdr2          |
| 0.939354776  | 8.56E-15 | 6.41E-19 | 4 | Phospho2      |
| 0.889024781  | 9.02E-15 | 6.75E-19 | 4 | P2ry10        |
| 0.683583952  | 9.38E-15 | 7.03E-19 | 4 | Papd7         |
| 0.715821518  | 1.62E-14 | 1.21E-18 | 4 | Kansl3        |
| 0.668090152  | 1.72E-14 | 1.29E-18 | 4 | Fbxl17        |
| -0.816516946 | 1.72E-14 | 1.29E-18 | 4 | Rps26         |
| 0.927428705  | 1.75E-14 | 1.31E-18 | 4 | Lactb2        |
| 0.647505017  | 1.91E-14 | 1.43E-18 | 4 | D11Wsu47e     |

|              |          |          |   |               |
|--------------|----------|----------|---|---------------|
| 0.881711304  | 2.33E-14 | 1.74E-18 | 4 | Mrpl45        |
| 0.549576414  | 2.92E-14 | 2.18E-18 | 4 | Map4k3        |
| 1.440702124  | 2.93E-14 | 2.20E-18 | 4 | Gpr84         |
| 0.901598323  | 3.15E-14 | 2.36E-18 | 4 | Pyurf         |
| 0.999754437  | 3.80E-14 | 2.84E-18 | 4 | Prss30        |
| 0.613550013  | 5.06E-14 | 3.79E-18 | 4 | Hivep1        |
| 0.567079291  | 5.42E-14 | 4.06E-18 | 4 | Stmn4         |
| 0.902919071  | 6.42E-14 | 4.81E-18 | 4 | Fcrl1         |
| 0.781407777  | 6.97E-14 | 5.22E-18 | 4 | Spsb2         |
| 0.844784765  | 7.22E-14 | 5.41E-18 | 4 | Fmn1          |
| 0.643927937  | 7.75E-14 | 5.81E-18 | 4 | Pqlc3         |
| 0.738187224  | 1.07E-13 | 8.01E-18 | 4 | Sdccag8       |
| 0.757596105  | 1.07E-13 | 8.02E-18 | 4 | Mrps35        |
| 0.690532275  | 1.11E-13 | 8.29E-18 | 4 | Mrps23        |
| 0.744721484  | 1.21E-13 | 9.05E-18 | 4 | Zfand2a       |
| 1.26262354   | 1.24E-13 | 9.32E-18 | 4 | Ddx56         |
| -0.845256436 | 1.34E-13 | 1.00E-17 | 4 | Mir6236       |
| 0.900666499  | 1.41E-13 | 1.05E-17 | 4 | Farsa         |
| 1.207264925  | 1.41E-13 | 1.06E-17 | 4 | Btd           |
| 0.591642713  | 1.75E-13 | 1.31E-17 | 4 | Gtf2f2        |
| 0.737194407  | 1.84E-13 | 1.38E-17 | 4 | Ubr2          |
| 0.589535794  | 1.96E-13 | 1.47E-17 | 4 | Ighmbp2       |
| 0.57057105   | 2.18E-13 | 1.63E-17 | 4 | Mir22hg       |
| 0.626594906  | 2.26E-13 | 1.69E-17 | 4 | Slc9a6        |
| 0.64637047   | 2.34E-13 | 1.75E-17 | 4 | Get4          |
| 0.824894322  | 2.63E-13 | 1.97E-17 | 4 | Ppp2r5a       |
| 0.592208222  | 2.69E-13 | 2.01E-17 | 4 | Leng1         |
| 0.661833772  | 2.74E-13 | 2.05E-17 | 4 | Ccdc66        |
| 0.88601726   | 2.90E-13 | 2.17E-17 | 4 | Pglyrp1       |
| 1.198576632  | 2.94E-13 | 2.20E-17 | 4 | Zdhhc16       |
| 0.299550244  | 3.22E-13 | 2.41E-17 | 4 | H2-Ke6        |
| 0.704840359  | 3.70E-13 | 2.77E-17 | 4 | Fgd3          |
| 1.044476183  | 3.87E-13 | 2.90E-17 | 4 | Fam98a        |
| 0.330041015  | 5.18E-13 | 3.88E-17 | 4 | Vgll4         |
| 0.762785936  | 5.33E-13 | 3.99E-17 | 4 | Tgm2          |
| 1.044143352  | 6.07E-13 | 4.55E-17 | 4 | Gcsh          |
| 1.324691039  | 6.19E-13 | 4.64E-17 | 4 | Ccdc15        |
| 0.68651192   | 6.23E-13 | 4.67E-17 | 4 | Ndufb10       |
| 0.851653866  | 7.26E-13 | 5.43E-17 | 4 | Dctpp1        |
| 0.755929438  | 7.56E-13 | 5.66E-17 | 4 | Fam110a       |
| 1.219130454  | 7.68E-13 | 5.75E-17 | 4 | Mrm1          |
| 0.690719781  | 7.93E-13 | 5.94E-17 | 4 | Tfpt          |
| 0.797594753  | 8.26E-13 | 6.18E-17 | 4 | Htra2         |
| 0.681286831  | 8.75E-13 | 6.55E-17 | 4 | Vash1         |
| 0.690262101  | 8.93E-13 | 6.69E-17 | 4 | Gpr137b       |
| 0.890430186  | 1.06E-12 | 7.97E-17 | 4 | Kcnn4         |
| 0.69728928   | 1.07E-12 | 7.99E-17 | 4 | Mphosph10     |
| 0.297767874  | 1.15E-12 | 8.59E-17 | 4 | Ppcs          |
| 0.898390863  | 1.22E-12 | 9.14E-17 | 4 | Ranbp3        |
| 0.515479102  | 1.23E-12 | 9.20E-17 | 4 | Rrp36         |
| 0.657262316  | 1.24E-12 | 9.31E-17 | 4 | Nsf           |
| 1.030192961  | 1.27E-12 | 9.55E-17 | 4 | Ltv1          |
| 1.231728029  | 1.57E-12 | 1.18E-16 | 4 | Zfp296        |
| 0.652464973  | 1.87E-12 | 1.40E-16 | 4 | Snupn         |
| 0.616049906  | 2.29E-12 | 1.72E-16 | 4 | Cpsf2         |
| 0.682331502  | 2.44E-12 | 1.83E-16 | 4 | Fam107b       |
| -1.013812863 | 2.45E-12 | 1.84E-16 | 4 | Zfp36         |
| 0.821021508  | 2.56E-12 | 1.91E-16 | 4 | Mvd           |
| 0.669702817  | 2.56E-12 | 1.92E-16 | 4 | Dpep2         |
| 0.893195312  | 2.60E-12 | 1.95E-16 | 4 | 2310009B15Rik |
| 0.634212265  | 2.73E-12 | 2.04E-16 | 4 | Echdc1        |

|              |          |          |   |               |
|--------------|----------|----------|---|---------------|
| 0.800493293  | 2.77E-12 | 2.08E-16 | 4 | Coq7          |
| 0.613258592  | 2.95E-12 | 2.21E-16 | 4 | Stx8          |
| 0.882269196  | 3.17E-12 | 2.38E-16 | 4 | Parn          |
| -0.50048498  | 3.24E-12 | 2.43E-16 | 4 | Cst3          |
| 0.659540324  | 3.98E-12 | 2.98E-16 | 4 | Psma6         |
| 0.928534996  | 3.99E-12 | 2.99E-16 | 4 | Cand1         |
| 0.63806837   | 4.34E-12 | 3.25E-16 | 4 | Cd320         |
| 0.994841004  | 4.46E-12 | 3.34E-16 | 4 | Cspg4         |
| 0.565899741  | 4.84E-12 | 3.63E-16 | 4 | Nudcd3        |
| 0.689096848  | 4.90E-12 | 3.67E-16 | 4 | Itpk1         |
| 0.86433404   | 5.61E-12 | 4.20E-16 | 4 | Plcl1         |
| 0.634510169  | 5.85E-12 | 4.38E-16 | 4 | Gbas          |
| 0.409812495  | 5.98E-12 | 4.48E-16 | 4 | Pttg1         |
| 0.79601951   | 6.29E-12 | 4.71E-16 | 4 | Bag6          |
| 0.598908451  | 6.37E-12 | 4.77E-16 | 4 | Nop58         |
| 0.678824494  | 6.62E-12 | 4.96E-16 | 4 | 4833439L19Rik |
| 1.0489202    | 8.13E-12 | 6.09E-16 | 4 | Ece2          |
| 0.540684854  | 8.53E-12 | 6.39E-16 | 4 | Arhgap22      |
| 0.626558768  | 8.56E-12 | 6.41E-16 | 4 | Gpatch2       |
| 0.808137102  | 9.26E-12 | 6.94E-16 | 4 | Arl5c         |
| 0.66511749   | 1.09E-11 | 8.15E-16 | 4 | Aldoc         |
| 0.766635055  | 1.13E-11 | 8.47E-16 | 4 | Phlpp1        |
| 1.016590338  | 1.20E-11 | 8.98E-16 | 4 | Fbxw2         |
| 0.700113792  | 1.26E-11 | 9.41E-16 | 4 | Mrpl54        |
| 0.290271903  | 1.28E-11 | 9.59E-16 | 4 | Heatr6        |
| 0.752718886  | 1.53E-11 | 1.14E-15 | 4 | Fbxl15        |
| 0.744330977  | 1.58E-11 | 1.18E-15 | 4 | Cd180         |
| 0.923936203  | 1.73E-11 | 1.30E-15 | 4 | Aak1          |
| 0.974342144  | 2.22E-11 | 1.67E-15 | 4 | Plrg1         |
| 0.741243     | 2.26E-11 | 1.70E-15 | 4 | Slc25a39      |
| 0.547062106  | 2.77E-11 | 2.07E-15 | 4 | Hif1an        |
| 0.764935292  | 3.01E-11 | 2.25E-15 | 4 | Slc35e4       |
| 0.5830576    | 3.03E-11 | 2.27E-15 | 4 | Fnta          |
| 0.573414824  | 3.16E-11 | 2.37E-15 | 4 | Tinf2         |
| 0.446173314  | 3.40E-11 | 2.55E-15 | 4 | Prps1         |
| 0.460046457  | 3.75E-11 | 2.81E-15 | 4 | Gtf2f1        |
| 0.566257732  | 4.04E-11 | 3.02E-15 | 4 | Tmx4          |
| 0.658310332  | 4.20E-11 | 3.14E-15 | 4 | Igf1          |
| 1.127240053  | 4.36E-11 | 3.27E-15 | 4 | Afmid         |
| 0.572595788  | 4.45E-11 | 3.33E-15 | 4 | Galnt7        |
| 0.696496506  | 4.52E-11 | 3.39E-15 | 4 | Ddb2          |
| 0.482651341  | 4.62E-11 | 3.46E-15 | 4 | Zbtb17        |
| 0.510388453  | 4.65E-11 | 3.48E-15 | 4 | Prkch         |
| -1.25843235  | 5.05E-11 | 3.78E-15 | 4 | Lyz1          |
| 0.717110676  | 5.09E-11 | 3.81E-15 | 4 | Maf1          |
| 0.677276656  | 5.26E-11 | 3.94E-15 | 4 | Golgb1        |
| 0.423055837  | 5.56E-11 | 4.16E-15 | 4 | Fam129a       |
| 0.546532497  | 5.65E-11 | 4.23E-15 | 4 | Fam50a        |
| 0.506277725  | 5.74E-11 | 4.30E-15 | 4 | Srfbp1        |
| 0.711454383  | 6.35E-11 | 4.76E-15 | 4 | Bre           |
| 0.686155707  | 6.48E-11 | 4.85E-15 | 4 | Tmem66        |
| -0.332428903 | 6.51E-11 | 4.88E-15 | 4 | B2m           |
| 0.589345945  | 6.52E-11 | 4.88E-15 | 4 | Fam217b       |
| 0.542177645  | 7.17E-11 | 5.37E-15 | 4 | Cx3cr1        |
| 0.549270782  | 7.63E-11 | 5.71E-15 | 4 | Sec61a2       |
| 0.535137266  | 7.97E-11 | 5.97E-15 | 4 | Uhrf1bp1      |
| 0.913304683  | 8.02E-11 | 6.00E-15 | 4 | Wdr75         |
| 0.630294352  | 8.57E-11 | 6.42E-15 | 4 | Traf7         |
| 0.710124305  | 8.74E-11 | 6.54E-15 | 4 | Nudt19        |
| 0.631463645  | 8.95E-11 | 6.70E-15 | 4 | Sod2          |
| 0.605194442  | 9.26E-11 | 6.94E-15 | 4 | Dtx2          |



|             |          |          |   |               |
|-------------|----------|----------|---|---------------|
| 0.753123695 | 9.27E-11 | 6.94E-15 | 4 | Rwdd4a        |
| 0.741738108 | 1.03E-10 | 7.74E-15 | 4 | Mrps34        |
| 0.995097258 | 1.04E-10 | 7.77E-15 | 4 | Gnptg         |
| 0.653568322 | 1.11E-10 | 8.28E-15 | 4 | Polr2f        |
| 0.627876567 | 1.13E-10 | 8.47E-15 | 4 | Polr2e        |
| 0.513616864 | 1.17E-10 | 8.79E-15 | 4 | Cacul1        |
| 0.550546726 | 1.24E-10 | 9.30E-15 | 4 | Pcyt1a        |
| 0.690221422 | 1.25E-10 | 9.35E-15 | 4 | Surf4         |
| 0.480779399 | 1.35E-10 | 1.01E-14 | 4 | Smad1         |
| 0.470491027 | 1.41E-10 | 1.06E-14 | 4 | Mrpl34        |
| 0.41151355  | 1.48E-10 | 1.11E-14 | 4 | Wdr18         |
| 0.905530569 | 1.50E-10 | 1.12E-14 | 4 | Sez6l2        |
| 0.828891488 | 1.50E-10 | 1.13E-14 | 4 | Nemf          |
| 0.522058287 | 1.50E-10 | 1.13E-14 | 4 | Exosc4        |
| 0.609501689 | 1.68E-10 | 1.26E-14 | 4 | Atp8b4        |
| 0.63469175  | 1.70E-10 | 1.28E-14 | 4 | Rilpl1        |
| 0.353082718 | 1.74E-10 | 1.30E-14 | 4 | Rexo1         |
| 0.777606173 | 1.77E-10 | 1.33E-14 | 4 | Scyl2         |
| 0.792403941 | 1.81E-10 | 1.36E-14 | 4 | Rilpl2        |
| 0.451135706 | 1.86E-10 | 1.40E-14 | 4 | Nsdhl         |
| 0.609561302 | 1.95E-10 | 1.46E-14 | 4 | Pfkip         |
| 0.832299009 | 2.08E-10 | 1.55E-14 | 4 | Zbtb48        |
| 0.55039292  | 2.22E-10 | 1.67E-14 | 4 | Ndr3          |
| 0.844091312 | 2.28E-10 | 1.71E-14 | 4 | Acot7         |
| 0.748212158 | 2.31E-10 | 1.73E-14 | 4 | Cdk2ap2       |
| 0.628211075 | 2.68E-10 | 2.00E-14 | 4 | Ppap2c        |
| 0.555500797 | 2.75E-10 | 2.06E-14 | 4 | Zdhhc3        |
| 0.600921581 | 2.81E-10 | 2.10E-14 | 4 | Cux1          |
| 0.711036137 | 2.84E-10 | 2.13E-14 | 4 | Polr2i        |
| 0.656212711 | 2.86E-10 | 2.14E-14 | 4 | Acot13        |
| 0.870663411 | 3.16E-10 | 2.37E-14 | 4 | Cd276         |
| 0.707262317 | 3.35E-10 | 2.51E-14 | 4 | Cblb          |
| 0.263795319 | 3.36E-10 | 2.52E-14 | 4 | Btbd7         |
| 1.067297292 | 3.54E-10 | 2.65E-14 | 4 | Trnau1ap      |
| 0.583816277 | 3.67E-10 | 2.75E-14 | 4 | Zbtb34        |
| 0.459708457 | 3.85E-10 | 2.88E-14 | 4 | Slc25a15      |
| 0.707329987 | 3.97E-10 | 2.98E-14 | 4 | Stxbp1        |
| 0.967380391 | 4.43E-10 | 3.32E-14 | 4 | Eif3b         |
| 0.657280449 | 4.48E-10 | 3.36E-14 | 4 | Fam129b       |
| 0.736265593 | 4.50E-10 | 3.37E-14 | 4 | Ercc6l2       |
| 0.606767929 | 4.53E-10 | 3.39E-14 | 4 | Kdm1b         |
| 0.69146814  | 4.89E-10 | 3.66E-14 | 4 | Pvr           |
| 0.633719953 | 5.33E-10 | 3.99E-14 | 4 | Cmtm8         |
| 0.452376559 | 5.40E-10 | 4.05E-14 | 4 | Mtmr10        |
| 0.713035688 | 6.02E-10 | 4.51E-14 | 4 | Bag3          |
| 0.693726327 | 6.82E-10 | 5.11E-14 | 4 | Pef1          |
| 0.607248792 | 7.10E-10 | 5.32E-14 | 4 | A430005L14Rik |
| 0.638278048 | 7.48E-10 | 5.60E-14 | 4 | Slc11a2       |
| 0.603355884 | 7.59E-10 | 5.69E-14 | 4 | Inpp5b        |
| 0.827521053 | 8.20E-10 | 6.14E-14 | 4 | Mtg2          |
| 0.704648328 | 8.52E-10 | 6.38E-14 | 4 | Fyn           |
| 0.631220251 | 9.00E-10 | 6.74E-14 | 4 | Asap1         |
| 0.513491644 | 9.83E-10 | 7.36E-14 | 4 | Cyp4v3        |
| 0.358134928 | 1.05E-09 | 7.84E-14 | 4 | Emc8          |
| 0.790720118 | 1.07E-09 | 8.03E-14 | 4 | Fam20b        |
| 0.451936484 | 1.09E-09 | 8.16E-14 | 4 | Copz2         |
| 0.554942862 | 1.14E-09 | 8.53E-14 | 4 | Pdia3         |
| 0.557691108 | 1.18E-09 | 8.85E-14 | 4 | Zfp672        |
| 0.511576835 | 1.21E-09 | 9.06E-14 | 4 | Extl3         |
| 0.584026297 | 1.42E-09 | 1.07E-13 | 4 | Rac2          |
| 0.575673762 | 1.43E-09 | 1.07E-13 | 4 | Exoc6b        |

|              |          |          |   |               |
|--------------|----------|----------|---|---------------|
| 0.486991984  | 1.45E-09 | 1.09E-13 | 4 | Cytip         |
| -0.337124849 | 1.47E-09 | 1.10E-13 | 4 | Actb          |
| 0.636802338  | 1.51E-09 | 1.13E-13 | 4 | Tep1          |
| 0.581707954  | 1.54E-09 | 1.15E-13 | 4 | Adam8         |
| 0.704127979  | 1.55E-09 | 1.16E-13 | 4 | Zdhhc4        |
| 0.478865054  | 1.60E-09 | 1.20E-13 | 4 | Sugt1         |
| 0.678843987  | 1.63E-09 | 1.22E-13 | 4 | Orc2          |
| 0.431218414  | 1.70E-09 | 1.27E-13 | 4 | Ola1          |
| 0.325091273  | 1.78E-09 | 1.34E-13 | 4 | Apex1         |
| 0.51219213   | 1.79E-09 | 1.34E-13 | 4 | Slc15a3       |
| 0.979311099  | 1.94E-09 | 1.46E-13 | 4 | Nr1h3         |
| 0.870563572  | 2.02E-09 | 1.52E-13 | 4 | Al462493      |
| 0.889774328  | 2.03E-09 | 1.52E-13 | 4 | Rusc2         |
| 0.789274453  | 2.03E-09 | 1.52E-13 | 4 | Dcstamp       |
| 0.746538442  | 2.19E-09 | 1.64E-13 | 4 | Pld3          |
| 0.591474533  | 2.24E-09 | 1.68E-13 | 4 | Gpr126        |
| 0.564577372  | 2.35E-09 | 1.76E-13 | 4 | Plec          |
| 0.416142397  | 2.47E-09 | 1.85E-13 | 4 | Pbxip1        |
| 0.623295915  | 2.48E-09 | 1.86E-13 | 4 | Il6st         |
| 0.577599687  | 2.56E-09 | 1.92E-13 | 4 | Cct6a         |
| 0.889332769  | 2.57E-09 | 1.92E-13 | 4 | Tchp          |
| 0.624717464  | 2.58E-09 | 1.93E-13 | 4 | Lrig2         |
| 0.56070828   | 2.65E-09 | 1.98E-13 | 4 | Sntb2         |
| 0.458900203  | 2.80E-09 | 2.10E-13 | 4 | Ntan1         |
| 0.568700208  | 3.06E-09 | 2.29E-13 | 4 | Cd200r1       |
| 0.781892838  | 3.23E-09 | 2.42E-13 | 4 | D17Wsu104e    |
| 0.663816957  | 3.45E-09 | 2.58E-13 | 4 | Tmem219       |
| 0.594597473  | 3.48E-09 | 2.61E-13 | 4 | Anxa3         |
| 0.280532922  | 3.49E-09 | 2.61E-13 | 4 | Akr1e1        |
| 1.252767365  | 3.51E-09 | 2.63E-13 | 4 | Pinx1         |
| 0.59869032   | 3.51E-09 | 2.63E-13 | 4 | Eif2b4        |
| 1.102391782  | 3.66E-09 | 2.74E-13 | 4 | Pigq          |
| 0.729250039  | 3.68E-09 | 2.76E-13 | 4 | Zfp142        |
| 0.369327336  | 3.69E-09 | 2.76E-13 | 4 | Exoc4         |
| 0.623906668  | 3.86E-09 | 2.89E-13 | 4 | Slc2a6        |
| 0.582881767  | 3.99E-09 | 2.99E-13 | 4 | Pdgfa         |
| 0.418458819  | 4.41E-09 | 3.30E-13 | 4 | Serpine1      |
| 0.283070991  | 4.42E-09 | 3.31E-13 | 4 | 1110001J03Rik |
| 0.606512042  | 4.49E-09 | 3.36E-13 | 4 | Atp7a         |
| 0.836312436  | 4.52E-09 | 3.39E-13 | 4 | Mtx2          |
| 0.691476956  | 4.66E-09 | 3.49E-13 | 4 | Cep250        |
| 1.077581674  | 4.77E-09 | 3.57E-13 | 4 | Rasa4         |
| 1.271670957  | 4.94E-09 | 3.70E-13 | 4 | Emr4          |
| 0.476505448  | 5.00E-09 | 3.75E-13 | 4 | Klhl11        |
| 1.079177962  | 5.06E-09 | 3.79E-13 | 4 | E130309D02Rik |
| 0.560189332  | 5.30E-09 | 3.97E-13 | 4 | Slc35e1       |
| 0.6955469    | 5.41E-09 | 4.05E-13 | 4 | Rbm33         |
| 0.492060152  | 5.50E-09 | 4.12E-13 | 4 | Dnaja3        |
| 0.600390312  | 6.05E-09 | 4.53E-13 | 4 | Srf           |
| 0.532739425  | 6.11E-09 | 4.57E-13 | 4 | Sec63         |
| 1.543833212  | 6.22E-09 | 4.66E-13 | 4 | Yars          |
| 0.388848754  | 6.34E-09 | 4.74E-13 | 4 | Rcan1         |
| 0.448052984  | 6.47E-09 | 4.84E-13 | 4 | Bmf           |
| 0.779554208  | 6.61E-09 | 4.95E-13 | 4 | Mrpl53        |
| 0.540694333  | 7.31E-09 | 5.47E-13 | 4 | Ppp2ca        |
| -0.349413389 | 7.44E-09 | 5.57E-13 | 4 | Tmsb4x        |
| 0.666564794  | 7.92E-09 | 5.93E-13 | 4 | Syt11         |
| 0.46267925   | 8.02E-09 | 6.01E-13 | 4 | Mcm5          |
| 0.562672766  | 8.29E-09 | 6.21E-13 | 4 | Ifitm1        |
| 0.388078611  | 8.47E-09 | 6.34E-13 | 4 | Cmtm4         |
| 0.610219663  | 8.97E-09 | 6.71E-13 | 4 | Il7r          |

|             |          |          |   |               |
|-------------|----------|----------|---|---------------|
| 0.384603528 | 9.09E-09 | 6.81E-13 | 4 | Msl2          |
| 1.243359761 | 9.10E-09 | 6.82E-13 | 4 | Ttyh2         |
| 0.666398808 | 9.50E-09 | 7.11E-13 | 4 | Mpp6          |
| 0.403255453 | 9.71E-09 | 7.27E-13 | 4 | Nsmce2        |
| 1.037414075 | 1.08E-08 | 8.07E-13 | 4 | Ift122        |
| 0.53608587  | 1.10E-08 | 8.25E-13 | 4 | Ccnd2         |
| 0.526694227 | 1.10E-08 | 8.25E-13 | 4 | Crat          |
| 0.531510854 | 1.12E-08 | 8.37E-13 | 4 | Tpd52l2       |
| 0.401140211 | 1.16E-08 | 8.69E-13 | 4 | Smarca4       |
| 0.648116529 | 1.17E-08 | 8.76E-13 | 4 | S100a1        |
| 0.446153309 | 1.22E-08 | 9.12E-13 | 4 | Rab6a         |
| 0.520845032 | 1.25E-08 | 9.37E-13 | 4 | Comtd1        |
| 0.392199319 | 1.26E-08 | 9.42E-13 | 4 | Alg5          |
| 0.397984769 | 1.28E-08 | 9.58E-13 | 4 | Triap1        |
| 0.620862535 | 1.29E-08 | 9.64E-13 | 4 | Fgd4          |
| 0.251857277 | 1.36E-08 | 1.02E-12 | 4 | Rcbtb2        |
| 0.66349316  | 1.38E-08 | 1.03E-12 | 4 | Ppa1          |
| 0.472025807 | 1.40E-08 | 1.05E-12 | 4 | Eri1          |
| 0.567672829 | 1.42E-08 | 1.06E-12 | 4 | Fuca1         |
| 0.755134932 | 1.45E-08 | 1.09E-12 | 4 | Chmp2b        |
| 0.471975255 | 1.57E-08 | 1.17E-12 | 4 | Znrd1         |
| 0.473765606 | 1.57E-08 | 1.17E-12 | 4 | Clec1b        |
| 0.536289101 | 1.59E-08 | 1.19E-12 | 4 | Pak1ip1       |
| 0.580307401 | 1.61E-08 | 1.20E-12 | 4 | G530011O06Rik |
| 0.586689446 | 1.64E-08 | 1.23E-12 | 4 | St7l          |
| 0.690677905 | 1.81E-08 | 1.36E-12 | 4 | Crlf2         |
| 0.689669656 | 1.84E-08 | 1.38E-12 | 4 | Fam168a       |
| 0.64513237  | 1.87E-08 | 1.40E-12 | 4 | Scoc          |
| 0.63891971  | 1.88E-08 | 1.41E-12 | 4 | Hspbp1        |
| 0.546802874 | 1.90E-08 | 1.43E-12 | 4 | 2210408F21Rik |
| 0.523913157 | 1.92E-08 | 1.44E-12 | 4 | Flnb          |
| 0.521716874 | 1.97E-08 | 1.47E-12 | 4 | Tcp1          |
| 0.452965184 | 1.98E-08 | 1.48E-12 | 4 | Psmc8         |
| 0.666422548 | 2.08E-08 | 1.56E-12 | 4 | Ubash3b       |
| 0.790801916 | 2.21E-08 | 1.66E-12 | 4 | Mefv          |
| 0.621169659 | 2.49E-08 | 1.87E-12 | 4 | Gsto1         |
| 0.573601088 | 2.49E-08 | 1.87E-12 | 4 | Eif3l         |
| 1.064199063 | 2.80E-08 | 2.10E-12 | 4 | Hipk2         |
| 0.670826889 | 2.81E-08 | 2.10E-12 | 4 | Wdr55         |
| 0.497149193 | 2.85E-08 | 2.14E-12 | 4 | B230118H07Rik |
| 0.549590561 | 2.89E-08 | 2.17E-12 | 4 | AB041803      |
| 0.76010664  | 2.98E-08 | 2.23E-12 | 4 | Eif2ak4       |
| 0.763062901 | 3.00E-08 | 2.25E-12 | 4 | Rnf14         |
| 0.50890907  | 3.03E-08 | 2.27E-12 | 4 | Lpl           |
| 0.455784547 | 3.52E-08 | 2.64E-12 | 4 | Ubqln1        |
| 0.737094568 | 3.77E-08 | 2.82E-12 | 4 | Sfswap        |
| 0.479397817 | 3.87E-08 | 2.90E-12 | 4 | Kat8          |
| 0.493476888 | 3.93E-08 | 2.94E-12 | 4 | Srp19         |
| 0.484803449 | 3.94E-08 | 2.95E-12 | 4 | Tacc1         |
| 0.481234819 | 4.00E-08 | 2.99E-12 | 4 | Icam1         |
| 0.372051267 | 4.01E-08 | 3.00E-12 | 4 | Znhit2        |
| 0.595369586 | 4.27E-08 | 3.20E-12 | 4 | Timm17a       |
| 0.589131583 | 4.28E-08 | 3.21E-12 | 4 | Lmf1          |
| 0.434081414 | 4.28E-08 | 3.21E-12 | 4 | Itgb1         |
| 0.534096989 | 4.31E-08 | 3.23E-12 | 4 | Hint2         |
| 0.342258947 | 4.61E-08 | 3.45E-12 | 4 | Hsd17b4       |
| 0.752944991 | 4.62E-08 | 3.46E-12 | 4 | Slc12a2       |
| 0.775842098 | 4.83E-08 | 3.61E-12 | 4 | Mier2         |
| 0.550393707 | 4.85E-08 | 3.63E-12 | 4 | Fiz1          |
| 0.556958867 | 4.86E-08 | 3.64E-12 | 4 | Sra1          |
| 0.471757289 | 5.02E-08 | 3.76E-12 | 4 | Neurl3        |

|              |          |          |   |               |
|--------------|----------|----------|---|---------------|
| 0.932510708  | 5.05E-08 | 3.78E-12 | 4 | Arhgef7       |
| -1.197267167 | 5.08E-08 | 3.80E-12 | 4 | Tgif1         |
| 0.948498083  | 5.09E-08 | 3.81E-12 | 4 | D6Wsu163e     |
| 0.527597954  | 5.11E-08 | 3.83E-12 | 4 | Gusb          |
| 0.499440436  | 5.24E-08 | 3.93E-12 | 4 | Alkbh2        |
| 0.527099984  | 5.46E-08 | 4.09E-12 | 4 | Naa38         |
| 0.589818699  | 5.56E-08 | 4.16E-12 | 4 | Ccdc77        |
| 0.489850465  | 5.79E-08 | 4.34E-12 | 4 | 1110007C09Rik |
| 0.539812913  | 5.84E-08 | 4.38E-12 | 4 | B4galt5       |
| 0.625218253  | 6.04E-08 | 4.52E-12 | 4 | Chordc1       |
| 0.847794613  | 6.08E-08 | 4.56E-12 | 4 | Cnnm2         |
| 0.353039371  | 6.34E-08 | 4.75E-12 | 4 | Ndufs2        |
| 0.396644861  | 6.52E-08 | 4.88E-12 | 4 | Arhgef3       |
| 0.402610207  | 6.68E-08 | 5.00E-12 | 4 | Pdlim1        |
| 0.526549081  | 6.86E-08 | 5.14E-12 | 4 | Sqrdl         |
| 0.334918116  | 6.88E-08 | 5.15E-12 | 4 | Ppcdc         |
| 0.505979181  | 7.12E-08 | 5.33E-12 | 4 | 2010111I01Rik |
| 0.407890749  | 7.18E-08 | 5.38E-12 | 4 | Ppfibp1       |
| 0.51249031   | 7.31E-08 | 5.48E-12 | 4 | Tmem205       |
| 0.562080896  | 7.39E-08 | 5.53E-12 | 4 | Mrpl20        |
| 0.73666109   | 7.39E-08 | 5.54E-12 | 4 | Zbtb20        |
| 1.239984478  | 7.58E-08 | 5.68E-12 | 4 | Tbl1x         |
| 0.586732706  | 7.65E-08 | 5.73E-12 | 4 | Rps19bp1      |
| 0.462514994  | 7.69E-08 | 5.76E-12 | 4 | Arid4b        |
| 0.553617431  | 7.85E-08 | 5.88E-12 | 4 | R3hdm1        |
| 1.078503197  | 7.88E-08 | 5.90E-12 | 4 | Snrnp35       |
| 0.597329368  | 7.96E-08 | 5.96E-12 | 4 | Psm12         |
| 0.869677861  | 8.01E-08 | 6.00E-12 | 4 | Ercc8         |
| 0.484842459  | 8.11E-08 | 6.08E-12 | 4 | Pqlc1         |
| 0.643474696  | 8.29E-08 | 6.21E-12 | 4 | Anapc5        |
| 0.532136102  | 8.30E-08 | 6.22E-12 | 4 | Eif4enif1     |
| 0.752557144  | 8.32E-08 | 6.23E-12 | 4 | Gmeb1         |
| 0.622321602  | 8.74E-08 | 6.55E-12 | 4 | Rab28         |
| 0.472592658  | 9.04E-08 | 6.77E-12 | 4 | Flii          |
| 0.763991031  | 9.08E-08 | 6.80E-12 | 4 | Crem          |
| 0.843436671  | 9.16E-08 | 6.86E-12 | 4 | Cpsf3         |
| 0.319766404  | 9.21E-08 | 6.90E-12 | 4 | Utrn          |
| 0.623373505  | 9.69E-08 | 7.26E-12 | 4 | G6pc3         |
| 0.560679028  | 1.02E-07 | 7.64E-12 | 4 | Mfsd6         |
| 0.300649106  | 1.11E-07 | 8.32E-12 | 4 | Rnf214        |
| 0.930423     | 1.15E-07 | 8.58E-12 | 4 | Trim33        |
| 0.479078018  | 1.16E-07 | 8.66E-12 | 4 | Anapc13       |
| 0.910922467  | 1.17E-07 | 8.74E-12 | 4 | Kctd10        |
| 0.579282792  | 1.17E-07 | 8.76E-12 | 4 | Rnf220        |
| 0.260226168  | 1.18E-07 | 8.82E-12 | 4 | Mrpl48        |
| 0.672832222  | 1.20E-07 | 8.96E-12 | 4 | Baiap2        |
| 0.6355559    | 1.20E-07 | 8.97E-12 | 4 | Rpp30         |
| 0.264044199  | 1.21E-07 | 9.10E-12 | 4 | Abcb9         |
| 0.377921428  | 1.24E-07 | 9.26E-12 | 4 | Etf1d         |
| 0.581747995  | 1.26E-07 | 9.41E-12 | 4 | Dtnbp1        |
| 1.039526727  | 1.31E-07 | 9.80E-12 | 4 | Cep83         |
| 0.302384921  | 1.33E-07 | 9.95E-12 | 4 | Sypl          |
| 0.514350157  | 1.35E-07 | 1.01E-11 | 4 | Dst           |
| 0.38445202   | 1.37E-07 | 1.02E-11 | 4 | Fam134c       |
| 0.38774274   | 1.39E-07 | 1.04E-11 | 4 | Ulk1          |
| 0.596658445  | 1.47E-07 | 1.10E-11 | 4 | Chchd5        |
| 0.349511784  | 1.50E-07 | 1.12E-11 | 4 | Cdkn2aipnl    |
| 0.654765007  | 1.66E-07 | 1.25E-11 | 4 | Mob1a         |
| 0.792114256  | 1.73E-07 | 1.29E-11 | 4 | Diap1         |
| 0.531640495  | 1.76E-07 | 1.31E-11 | 4 | Hvcn1         |
| 1.41678516   | 1.76E-07 | 1.32E-11 | 4 | Mycbp         |

|              |          |          |   |               |
|--------------|----------|----------|---|---------------|
| 0.694239672  | 1.78E-07 | 1.34E-11 | 4 | Pold3         |
| 0.528247702  | 1.99E-07 | 1.49E-11 | 4 | Tspan13       |
| 0.570737629  | 2.04E-07 | 1.53E-11 | 4 | Polr3k        |
| 0.425063466  | 2.19E-07 | 1.64E-11 | 4 | BC003965      |
| 0.70464154   | 2.22E-07 | 1.66E-11 | 4 | Psmc1         |
| 0.443147142  | 2.25E-07 | 1.68E-11 | 4 | Carkd         |
| 0.699929174  | 2.35E-07 | 1.76E-11 | 4 | Actn1         |
| 0.637961388  | 2.43E-07 | 1.82E-11 | 4 | Ipo7          |
| 0.719223719  | 2.46E-07 | 1.85E-11 | 4 | Rc3h1         |
| 0.411686487  | 2.56E-07 | 1.91E-11 | 4 | Tars2         |
| 0.566963108  | 2.57E-07 | 1.92E-11 | 4 | Gorasp2       |
| 0.358969642  | 2.65E-07 | 1.99E-11 | 4 | Tlk1          |
| 0.642867711  | 2.66E-07 | 1.99E-11 | 4 | Rabl3         |
| 0.449235381  | 2.82E-07 | 2.12E-11 | 4 | Trim2         |
| 0.250874027  | 2.84E-07 | 2.12E-11 | 4 | Endod1        |
| 1.294428421  | 2.85E-07 | 2.13E-11 | 4 | Stradb        |
| 0.322328594  | 3.03E-07 | 2.27E-11 | 4 | Erap1         |
| 0.452752348  | 3.04E-07 | 2.28E-11 | 4 | Mrpl24        |
| 0.585918963  | 3.14E-07 | 2.35E-11 | 4 | Cdc25b        |
| 0.40908358   | 3.19E-07 | 2.39E-11 | 4 | Psph          |
| 0.58443609   | 3.23E-07 | 2.42E-11 | 4 | Emc4          |
| 0.717393762  | 3.25E-07 | 2.43E-11 | 4 | Gab2          |
| 0.481199385  | 3.29E-07 | 2.46E-11 | 4 | Nap1l4        |
| 0.490998311  | 3.40E-07 | 2.54E-11 | 4 | Atp5g3        |
| 0.319867438  | 3.51E-07 | 2.63E-11 | 4 | Fam20c        |
| 0.464610763  | 3.55E-07 | 2.66E-11 | 4 | Tmem229b      |
| 0.438592066  | 3.56E-07 | 2.67E-11 | 4 | Rbm10         |
| 0.589520771  | 3.58E-07 | 2.68E-11 | 4 | Cpd           |
| 0.595920816  | 3.66E-07 | 2.74E-11 | 4 | Zranb1        |
| 0.71657801   | 3.72E-07 | 2.79E-11 | 4 | Eva1b         |
| 0.527379033  | 3.72E-07 | 2.79E-11 | 4 | Mrpl16        |
| 0.543497756  | 3.77E-07 | 2.82E-11 | 4 | Hck           |
| 0.50196176   | 3.93E-07 | 2.95E-11 | 4 | Napa          |
| 0.338220114  | 4.06E-07 | 3.04E-11 | 4 | Ptprcap       |
| 0.515078412  | 4.18E-07 | 3.13E-11 | 4 | Rtca          |
| 0.451773617  | 4.42E-07 | 3.31E-11 | 4 | Dbnidd2       |
| 1.170820597  | 4.43E-07 | 3.32E-11 | 4 | Vps13a        |
| 0.298469801  | 4.56E-07 | 3.41E-11 | 4 | Mamdc2        |
| 0.390050787  | 4.67E-07 | 3.50E-11 | 4 | Peak1         |
| 0.437717648  | 4.82E-07 | 3.61E-11 | 4 | Gde1          |
| 0.629905032  | 4.87E-07 | 3.65E-11 | 4 | Slc11a1       |
| 0.439200356  | 4.93E-07 | 3.69E-11 | 4 | Oxr1          |
| 0.507746239  | 4.99E-07 | 3.73E-11 | 4 | Setd2         |
| 0.843602667  | 4.99E-07 | 3.74E-11 | 4 | 1110012L19Rik |
| 0.435394425  | 5.46E-07 | 4.09E-11 | 4 | Tmem55a       |
| 0.333869083  | 5.65E-07 | 4.23E-11 | 4 | Brcc3         |
| 0.421149567  | 5.74E-07 | 4.30E-11 | 4 | Abtb2         |
| 0.446913349  | 5.82E-07 | 4.36E-11 | 4 | Mrps25        |
| 0.443321235  | 5.94E-07 | 4.45E-11 | 4 | Xpo7          |
| 0.405227434  | 5.95E-07 | 4.46E-11 | 4 | Slc3a2        |
| 0.869337138  | 5.99E-07 | 4.49E-11 | 4 | Kctd17        |
| 0.409980865  | 6.03E-07 | 4.52E-11 | 4 | Ykt6          |
| 0.534348474  | 6.21E-07 | 4.65E-11 | 4 | Anxa6         |
| 0.457266607  | 6.24E-07 | 4.68E-11 | 4 | Casc3         |
| 0.613140685  | 6.27E-07 | 4.70E-11 | 4 | Rhoc          |
| 1.060084688  | 6.29E-07 | 4.71E-11 | 4 | Hmgcr         |
| 0.491260468  | 6.34E-07 | 4.75E-11 | 4 | Snrnp25       |
| 0.57786437   | 6.38E-07 | 4.78E-11 | 4 | Nduf2         |
| 0.355124073  | 6.47E-07 | 4.85E-11 | 4 | Sec61a1       |
| 0.516604959  | 6.60E-07 | 4.94E-11 | 4 | Ammecr1l      |
| -0.282024513 | 6.65E-07 | 4.98E-11 | 4 | Malat1        |

|              |          |          |   |          |
|--------------|----------|----------|---|----------|
| 0.377309035  | 7.07E-07 | 5.29E-11 | 4 | Ptpra    |
| 0.555102422  | 7.13E-07 | 5.34E-11 | 4 | Lrrfip1  |
| 0.306158725  | 7.17E-07 | 5.37E-11 | 4 | N4bp2    |
| 0.508801148  | 7.31E-07 | 5.48E-11 | 4 | Brd2     |
| 0.268568417  | 7.33E-07 | 5.49E-11 | 4 | Igbp1    |
| 0.988275925  | 7.34E-07 | 5.50E-11 | 4 | Gpatch4  |
| 0.392289566  | 7.35E-07 | 5.51E-11 | 4 | Runx3    |
| 0.506246004  | 7.41E-07 | 5.55E-11 | 4 | Rabac1   |
| 0.293902305  | 7.51E-07 | 5.62E-11 | 4 | Tia1     |
| 0.468558534  | 8.13E-07 | 6.09E-11 | 4 | Birc6    |
| 0.485629787  | 8.27E-07 | 6.20E-11 | 4 | Laptm4b  |
| 0.267149246  | 8.79E-07 | 6.59E-11 | 4 | Stap1    |
| 0.5184028    | 8.89E-07 | 6.66E-11 | 4 | Trappc5  |
| 0.318356274  | 8.91E-07 | 6.67E-11 | 4 | Immt     |
| 0.569038818  | 9.03E-07 | 6.76E-11 | 4 | Wdr91    |
| 0.498018257  | 9.20E-07 | 6.89E-11 | 4 | Kif16b   |
| 0.544539233  | 1.06E-06 | 7.91E-11 | 4 | BC004004 |
| 0.567605432  | 1.07E-06 | 7.99E-11 | 4 | Ywhaq    |
| 0.270270071  | 1.07E-06 | 8.03E-11 | 4 | Bach1    |
| 0.890308419  | 1.08E-06 | 8.07E-11 | 4 | Dgcr14   |
| 0.510817377  | 1.14E-06 | 8.51E-11 | 4 | Ndufa8   |
| 0.54777262   | 1.15E-06 | 8.59E-11 | 4 | Chid1    |
| 0.29610713   | 1.16E-06 | 8.68E-11 | 4 | Tbpl1    |
| 0.495692604  | 1.17E-06 | 8.74E-11 | 4 | Limd2    |
| 0.367429738  | 1.18E-06 | 8.87E-11 | 4 | Psmc5    |
| 1.002444612  | 1.20E-06 | 9.02E-11 | 4 | Ago1     |
| 0.92533716   | 1.21E-06 | 9.04E-11 | 4 | Stk16    |
| 0.339871417  | 1.24E-06 | 9.32E-11 | 4 | Sap30l   |
| 0.58955221   | 1.30E-06 | 9.73E-11 | 4 | Lrpprc   |
| 0.292867764  | 1.34E-06 | 1.00E-10 | 4 | Zmpste24 |
| 0.369742191  | 1.37E-06 | 1.03E-10 | 4 | Zdhhc20  |
| 0.494007281  | 1.38E-06 | 1.04E-10 | 4 | Nipbl    |
| -1.001757279 | 1.40E-06 | 1.05E-10 | 4 | Cebpb    |
| 0.784188836  | 1.46E-06 | 1.09E-10 | 4 | Ndufaf5  |
| 0.648726064  | 1.47E-06 | 1.10E-10 | 4 | Slk      |
| 0.50245013   | 1.50E-06 | 1.12E-10 | 4 | Letmd1   |
| 0.614840281  | 1.53E-06 | 1.14E-10 | 4 | Elp5     |
| 0.402664278  | 1.53E-06 | 1.15E-10 | 4 | Map7d1   |
| 0.518826505  | 1.55E-06 | 1.16E-10 | 4 | AK010878 |
| 0.409942456  | 1.59E-06 | 1.19E-10 | 4 | Ppt1     |
| 0.383931922  | 1.62E-06 | 1.21E-10 | 4 | Sltm     |
| 0.425464616  | 1.63E-06 | 1.22E-10 | 4 | Havcr2   |
| 0.377372807  | 1.66E-06 | 1.24E-10 | 4 | Zfp637   |
| 0.68582345   | 1.84E-06 | 1.38E-10 | 4 | Pik3r5   |
| 0.609876813  | 1.84E-06 | 1.38E-10 | 4 | Mtf2     |
| 0.590730588  | 1.89E-06 | 1.42E-10 | 4 | Dohh     |
| 0.821517571  | 1.91E-06 | 1.43E-10 | 4 | Ntmt1    |
| 0.357260363  | 1.93E-06 | 1.45E-10 | 4 | Gadd45g  |
| 0.522326772  | 2.00E-06 | 1.50E-10 | 4 | Slc39a9  |
| -0.436702393 | 2.00E-06 | 1.50E-10 | 4 | Junb     |
| 0.766929973  | 2.09E-06 | 1.57E-10 | 4 | Bud13    |
| 0.298451498  | 2.10E-06 | 1.57E-10 | 4 | Pus7     |
| 0.535963285  | 2.10E-06 | 1.58E-10 | 4 | Tmem86a  |
| 0.418357225  | 2.37E-06 | 1.78E-10 | 4 | Cd97     |
| 0.446801244  | 2.46E-06 | 1.84E-10 | 4 | Mob2     |
| 0.432466039  | 2.48E-06 | 1.86E-10 | 4 | Slamf9   |
| 0.621562723  | 2.48E-06 | 1.86E-10 | 4 | Stk24    |
| 0.493175813  | 2.53E-06 | 1.89E-10 | 4 | Coa3     |
| 0.351542521  | 2.55E-06 | 1.91E-10 | 4 | Eea1     |
| 0.678085562  | 2.57E-06 | 1.93E-10 | 4 | Cyb5r3   |
| 0.532959972  | 2.58E-06 | 1.94E-10 | 4 | Prpf40a  |

|              |          |          |   |               |
|--------------|----------|----------|---|---------------|
| 0.701766716  | 2.69E-06 | 2.01E-10 | 4 | R3hcc1l       |
| 0.330950175  | 2.77E-06 | 2.08E-10 | 4 | Ttc17         |
| 0.391171907  | 2.82E-06 | 2.11E-10 | 4 | Aip           |
| 0.373087664  | 2.82E-06 | 2.11E-10 | 4 | Lsp1          |
| 0.804223203  | 2.87E-06 | 2.15E-10 | 4 | Trappc1       |
| 0.470978045  | 2.88E-06 | 2.16E-10 | 4 | Trex1         |
| 0.649875676  | 2.92E-06 | 2.19E-10 | 4 | Dstn          |
| 0.918762595  | 3.06E-06 | 2.29E-10 | 4 | Mfsd11        |
| 0.411358072  | 3.07E-06 | 2.30E-10 | 4 | Ythdf2        |
| 0.542307854  | 3.10E-06 | 2.33E-10 | 4 | Cd151         |
| 0.61303553   | 3.13E-06 | 2.35E-10 | 4 | Elov1         |
| 0.507388239  | 3.18E-06 | 2.38E-10 | 4 | Cd93          |
| 0.630402393  | 3.18E-06 | 2.38E-10 | 4 | Skiv2l2       |
| 0.401465367  | 3.21E-06 | 2.40E-10 | 4 | Vipas39       |
| 0.467185108  | 3.22E-06 | 2.41E-10 | 4 | Arih2         |
| 0.414950283  | 3.33E-06 | 2.50E-10 | 4 | Polr2a        |
| 0.331790639  | 3.50E-06 | 2.62E-10 | 4 | Gemin7        |
| 0.990499732  | 3.68E-06 | 2.75E-10 | 4 | Ttc27         |
| 0.754380511  | 3.81E-06 | 2.85E-10 | 4 | Tmem70        |
| 0.445710399  | 3.88E-06 | 2.90E-10 | 4 | Usp16         |
| 0.292315935  | 4.01E-06 | 3.00E-10 | 4 | Prps2         |
| 0.320385607  | 4.12E-06 | 3.09E-10 | 4 | Mcm6          |
| 0.432122319  | 4.27E-06 | 3.20E-10 | 4 | Syng1         |
| 0.507268649  | 4.34E-06 | 3.25E-10 | 4 | Smn1          |
| 0.410658785  | 4.41E-06 | 3.30E-10 | 4 | Tmem179b      |
| 0.483463512  | 4.41E-06 | 3.31E-10 | 4 | Lasp1         |
| 0.40652275   | 4.42E-06 | 3.31E-10 | 4 | Elov15        |
| 0.449191354  | 4.72E-06 | 3.54E-10 | 4 | Trak1         |
| 0.580904763  | 4.79E-06 | 3.59E-10 | 4 | Tmem42        |
| 0.302467771  | 4.83E-06 | 3.62E-10 | 4 | Prdx6         |
| 0.568506338  | 5.15E-06 | 3.86E-10 | 4 | Mrps6         |
| 0.593807886  | 5.28E-06 | 3.96E-10 | 4 | Crkl          |
| 0.485308739  | 5.33E-06 | 3.99E-10 | 4 | Il1rn         |
| 0.780081866  | 5.38E-06 | 4.03E-10 | 4 | Plac8         |
| -0.558748467 | 5.39E-06 | 4.04E-10 | 4 | Rps18         |
| 0.422597926  | 5.53E-06 | 4.14E-10 | 4 | Fopnl         |
| 0.444329733  | 5.59E-06 | 4.18E-10 | 4 | Aco1          |
| 0.484428075  | 5.71E-06 | 4.28E-10 | 4 | Pilrb2        |
| 0.252547209  | 5.75E-06 | 4.30E-10 | 4 | Snrnp48       |
| 0.26598424   | 5.78E-06 | 4.33E-10 | 4 | Blzf1         |
| 0.512647663  | 5.84E-06 | 4.37E-10 | 4 | Tmem11        |
| 0.632867562  | 5.86E-06 | 4.39E-10 | 4 | Akr1b10       |
| 0.591241523  | 5.94E-06 | 4.45E-10 | 4 | Glg1          |
| 0.27454811   | 6.12E-06 | 4.59E-10 | 4 | Ralbp1        |
| 0.406657511  | 6.15E-06 | 4.60E-10 | 4 | Eprs          |
| 0.412077804  | 6.61E-06 | 4.95E-10 | 4 | Stk38         |
| 0.633553171  | 6.63E-06 | 4.97E-10 | 4 | Smarcd1       |
| -1.798949118 | 6.66E-06 | 4.99E-10 | 4 | Maf           |
| 0.402669152  | 6.76E-06 | 5.06E-10 | 4 | Ifnar2        |
| 0.427568778  | 6.84E-06 | 5.13E-10 | 4 | Cep350        |
| 0.262372307  | 6.86E-06 | 5.13E-10 | 4 | H2-Oa         |
| 0.848670438  | 6.96E-06 | 5.21E-10 | 4 | Trim35        |
| 0.532627216  | 7.33E-06 | 5.49E-10 | 4 | D930015E06Rik |
| 0.384323358  | 7.35E-06 | 5.50E-10 | 4 | Api5          |
| 0.538580849  | 7.35E-06 | 5.50E-10 | 4 | Cwc25         |
| 0.996135759  | 7.45E-06 | 5.58E-10 | 4 | Mrps30        |
| 0.554929166  | 7.58E-06 | 5.68E-10 | 4 | Qtrt1         |
| 0.337217572  | 7.67E-06 | 5.75E-10 | 4 | Gdf15         |
| 0.548168654  | 7.81E-06 | 5.85E-10 | 4 | Msra          |
| 0.71758966   | 7.97E-06 | 5.97E-10 | 4 | Por           |
| 0.555554987  | 7.98E-06 | 5.98E-10 | 4 | Pds5b         |

|              |          |          |   |               |
|--------------|----------|----------|---|---------------|
| 0.377367489  | 7.98E-06 | 5.98E-10 | 4 | Sptan1        |
| 0.469652622  | 8.03E-06 | 6.01E-10 | 4 | Fis1          |
| 0.401457714  | 8.08E-06 | 6.05E-10 | 4 | Trem2         |
| 0.405049456  | 8.41E-06 | 6.30E-10 | 4 | Cdk18         |
| 0.267544802  | 8.52E-06 | 6.38E-10 | 4 | Aarsd1        |
| 0.264413502  | 8.61E-06 | 6.45E-10 | 4 | Cks1b         |
| 0.585385     | 8.85E-06 | 6.63E-10 | 4 | Alcam         |
| 0.987809147  | 9.09E-06 | 6.81E-10 | 4 | Ercc6         |
| 1.221738821  | 9.17E-06 | 6.87E-10 | 4 | Naf1          |
| 0.679955716  | 9.57E-06 | 7.16E-10 | 4 | Rps6kb2       |
| -0.63392573  | 9.57E-06 | 7.17E-10 | 4 | Jund          |
| 0.664764247  | 9.60E-06 | 7.19E-10 | 4 | Abcd4         |
| 0.354962768  | 9.66E-06 | 7.24E-10 | 4 | Sde2          |
| 0.347676803  | 9.78E-06 | 7.32E-10 | 4 | Jdp2          |
| 0.693582068  | 9.80E-06 | 7.34E-10 | 4 | Zfp318        |
| 0.553711386  | 1.00E-05 | 7.51E-10 | 4 | Rfc3          |
| 0.336989436  | 1.02E-05 | 7.65E-10 | 4 | Pon3          |
| 0.848657816  | 1.02E-05 | 7.65E-10 | 4 | Pptc7         |
| 0.349646827  | 1.03E-05 | 7.72E-10 | 4 | Wasf2         |
| 0.474182632  | 1.05E-05 | 7.88E-10 | 4 | A930013F10Rik |
| 0.405000001  | 1.05E-05 | 7.89E-10 | 4 | Syne1         |
| 0.569010657  | 1.09E-05 | 8.16E-10 | 4 | Tmed10        |
| 0.46798247   | 1.10E-05 | 8.21E-10 | 4 | Upf2          |
| 0.679068273  | 1.10E-05 | 8.26E-10 | 4 | Sh3tc1        |
| 0.378063412  | 1.15E-05 | 8.58E-10 | 4 | Gpr132        |
| 0.711924857  | 1.15E-05 | 8.64E-10 | 4 | Ms4a4b        |
| 0.365152504  | 1.18E-05 | 8.80E-10 | 4 | Csnk1d        |
| 0.39134483   | 1.18E-05 | 8.81E-10 | 4 | Atg101        |
| 0.450133565  | 1.18E-05 | 8.83E-10 | 4 | Ints4         |
| 0.39596556   | 1.21E-05 | 9.08E-10 | 4 | Sigmar1       |
| 0.57814634   | 1.35E-05 | 1.01E-09 | 4 | Cd5           |
| 0.341022353  | 1.39E-05 | 1.04E-09 | 4 | Pdzd8         |
| 0.571467296  | 1.43E-05 | 1.07E-09 | 4 | Cltb          |
| 0.518950027  | 1.48E-05 | 1.11E-09 | 4 | Letm1         |
| 0.447616351  | 1.48E-05 | 1.11E-09 | 4 | Zfp524        |
| 0.771912889  | 1.49E-05 | 1.11E-09 | 4 | Wdr74         |
| 0.464749644  | 1.53E-05 | 1.15E-09 | 4 | Nucb2         |
| 0.379964915  | 1.54E-05 | 1.15E-09 | 4 | Rwdd1         |
| 0.31015813   | 1.56E-05 | 1.17E-09 | 4 | Pigf          |
| 0.57057105   | 1.59E-05 | 1.19E-09 | 4 | Clasp1        |
| 0.982767817  | 1.63E-05 | 1.22E-09 | 4 | Ttc12         |
| 0.365467038  | 1.63E-05 | 1.22E-09 | 4 | Nhp2          |
| 0.674240275  | 1.66E-05 | 1.24E-09 | 4 | Stam2         |
| 0.369979802  | 1.72E-05 | 1.29E-09 | 4 | Rit1          |
| 0.771743879  | 1.72E-05 | 1.29E-09 | 4 | Myo10         |
| 0.635776553  | 1.74E-05 | 1.30E-09 | 4 | Scd1          |
| 0.448324138  | 1.74E-05 | 1.30E-09 | 4 | Slc25a33      |
| 0.266273466  | 1.84E-05 | 1.38E-09 | 4 | Mrpl17        |
| 0.45601458   | 1.95E-05 | 1.46E-09 | 4 | Pggt1b        |
| 0.40244211   | 1.98E-05 | 1.48E-09 | 4 | Capg          |
| 0.377528517  | 1.98E-05 | 1.48E-09 | 4 | Ctcf          |
| 0.347300147  | 1.98E-05 | 1.49E-09 | 4 | Ddx24         |
| 0.31857327   | 1.99E-05 | 1.49E-09 | 4 | Cbr3          |
| 0.689275843  | 2.04E-05 | 1.53E-09 | 4 | Napg          |
| -0.579499432 | 2.12E-05 | 1.59E-09 | 4 | H2-K1         |
| 0.445939499  | 2.19E-05 | 1.64E-09 | 4 | Mdm2          |
| 0.493320232  | 2.24E-05 | 1.68E-09 | 4 | Phactr4       |
| 0.482750708  | 2.24E-05 | 1.68E-09 | 4 | Ext1          |
| 0.784851599  | 2.25E-05 | 1.69E-09 | 4 | Ticam1        |
| 0.313028442  | 2.27E-05 | 1.70E-09 | 4 | Ech1          |
| 0.37653284   | 2.34E-05 | 1.75E-09 | 4 | Arl5b         |



|              |          |          |   |               |
|--------------|----------|----------|---|---------------|
| 0.288741256  | 2.36E-05 | 1.77E-09 | 4 | Ap1g1         |
| 0.637488801  | 2.39E-05 | 1.79E-09 | 4 | Ift43         |
| 0.583985444  | 2.42E-05 | 1.81E-09 | 4 | Atad5         |
| 0.512516247  | 2.48E-05 | 1.85E-09 | 4 | Fdx1          |
| 0.890475144  | 2.59E-05 | 1.94E-09 | 4 | Arhgap6       |
| 0.603692868  | 2.63E-05 | 1.97E-09 | 4 | Mmgt1         |
| 0.296093085  | 2.64E-05 | 1.98E-09 | 4 | Dnttip2       |
| 0.376072463  | 2.64E-05 | 1.98E-09 | 4 | Vimp          |
| -0.619656124 | 2.65E-05 | 1.98E-09 | 4 | Sat1          |
| 1.177587474  | 2.65E-05 | 1.99E-09 | 4 | Nudt6         |
| 0.340887301  | 2.66E-05 | 1.99E-09 | 4 | Prpf38a       |
| 0.558266882  | 2.69E-05 | 2.02E-09 | 4 | Fam96b        |
| 0.532144782  | 2.79E-05 | 2.09E-09 | 4 | Rest          |
| 0.502444989  | 2.80E-05 | 2.10E-09 | 4 | Chmp6         |
| 0.418439881  | 2.91E-05 | 2.18E-09 | 4 | Uvrag         |
| 1.033862792  | 2.96E-05 | 2.22E-09 | 4 | Caprin1       |
| 0.395156389  | 3.04E-05 | 2.28E-09 | 4 | Sdf4          |
| 0.401418727  | 3.13E-05 | 2.35E-09 | 4 | Uba1          |
| 0.435373373  | 3.14E-05 | 2.35E-09 | 4 | S100a4        |
| 0.330461     | 3.19E-05 | 2.39E-09 | 4 | Tcf3          |
| 0.305942638  | 3.21E-05 | 2.41E-09 | 4 | Foxn3         |
| 0.844208678  | 3.22E-05 | 2.41E-09 | 4 | Gm5617        |
| 0.374500252  | 3.45E-05 | 2.58E-09 | 4 | Rps6ka1       |
| 0.37429829   | 3.62E-05 | 2.71E-09 | 4 | Tln1          |
| 0.446757261  | 3.87E-05 | 2.90E-09 | 4 | Slc6a8        |
| 0.279250567  | 3.91E-05 | 2.92E-09 | 4 | Ccdc23        |
| 0.301325587  | 3.91E-05 | 2.93E-09 | 4 | Usp8          |
| 0.287979817  | 3.95E-05 | 2.96E-09 | 4 | Adam17        |
| 0.365107517  | 3.97E-05 | 2.97E-09 | 4 | Vdac2         |
| 0.853657039  | 4.27E-05 | 3.20E-09 | 4 | Ermp1         |
| 0.300368598  | 4.47E-05 | 3.35E-09 | 4 | 3110043O21Rik |
| -0.750363291 | 4.49E-05 | 3.36E-09 | 4 | Rpl39         |
| 0.372978079  | 4.50E-05 | 3.37E-09 | 4 | Arpp19        |
| 0.263928051  | 4.53E-05 | 3.39E-09 | 4 | Prkcb         |
| 0.634521564  | 4.74E-05 | 3.55E-09 | 4 | Arfgap1       |
| 0.565366894  | 4.79E-05 | 3.59E-09 | 4 | Dhfr          |
| 0.317837314  | 4.84E-05 | 3.62E-09 | 4 | Fkrp          |
| 0.724558488  | 4.84E-05 | 3.63E-09 | 4 | Yif1a         |
| 0.506301155  | 4.86E-05 | 3.64E-09 | 4 | D8Erttd82e    |
| 0.564780446  | 4.89E-05 | 3.66E-09 | 4 | Ube2a         |
| 0.548757101  | 4.98E-05 | 3.73E-09 | 4 | Rpain         |
| 0.425063466  | 4.99E-05 | 3.74E-09 | 4 | Ercc5         |
| 0.309645896  | 5.04E-05 | 3.77E-09 | 4 | Ncf4          |
| 0.386666284  | 5.04E-05 | 3.78E-09 | 4 | Ddost         |
| -1.244826887 | 5.05E-05 | 3.78E-09 | 4 | Ier3          |
| 0.3901819    | 5.11E-05 | 3.83E-09 | 4 | Ptpn6         |
| 0.441417847  | 5.52E-05 | 4.13E-09 | 4 | Bop1          |
| 0.579480139  | 5.52E-05 | 4.13E-09 | 4 | Cyb5d2        |
| 0.48080105   | 5.58E-05 | 4.18E-09 | 4 | Slc48a1       |
| 0.890469386  | 5.90E-05 | 4.42E-09 | 4 | Arhgap10      |
| 0.422241953  | 6.04E-05 | 4.52E-09 | 4 | Hsd17b12      |
| 0.432560049  | 6.24E-05 | 4.67E-09 | 4 | Msanttd4      |
| 0.679687891  | 6.44E-05 | 4.82E-09 | 4 | Traf1         |
| 0.407240983  | 6.67E-05 | 5.00E-09 | 4 | Cox7a2        |
| 0.421870893  | 7.02E-05 | 5.26E-09 | 4 | Rhoh          |
| 0.347905099  | 7.08E-05 | 5.31E-09 | 4 | Ell2          |
| 0.306821399  | 7.17E-05 | 5.37E-09 | 4 | Tfam          |
| 0.303030859  | 7.39E-05 | 5.53E-09 | 4 | Phf7          |
| 0.457078796  | 7.40E-05 | 5.54E-09 | 4 | Akip1         |
| 0.415387266  | 7.50E-05 | 5.62E-09 | 4 | Appt          |
| 0.965457291  | 7.78E-05 | 5.83E-09 | 4 | Pdzd11        |

|              |             |          |   |               |
|--------------|-------------|----------|---|---------------|
| 0.449345809  | 7.82E-05    | 5.86E-09 | 4 | Arhgap24      |
| 0.427786752  | 7.88E-05    | 5.90E-09 | 4 | Grcc10        |
| 1.212467896  | 7.95E-05    | 5.95E-09 | 4 | Nrf1          |
| 0.531260778  | 7.95E-05    | 5.96E-09 | 4 | Lrrc59        |
| 0.605500008  | 8.19E-05    | 6.14E-09 | 4 | Rad52         |
| -0.748608722 | 8.76E-05    | 6.56E-09 | 4 | Rpl37a        |
| 0.422974571  | 8.82E-05    | 6.60E-09 | 4 | Cox5a         |
| 0.629577131  | 8.82E-05    | 6.60E-09 | 4 | Cct7          |
| 0.476356761  | 8.86E-05    | 6.64E-09 | 4 | Abcc1         |
| 0.319139449  | 8.94E-05    | 6.70E-09 | 4 | 4921524J17Rik |
| 0.390739517  | 9.14E-05    | 6.85E-09 | 4 | Ckb           |
| 0.424162121  | 9.21E-05    | 6.89E-09 | 4 | Abcg1         |
| 0.369597927  | 9.29E-05    | 6.96E-09 | 4 | Anxa7         |
| 0.351847056  | 9.38E-05    | 7.02E-09 | 4 | Chchd1        |
| 0.490515647  | 9.39E-05    | 7.03E-09 | 4 | Cdt1          |
| 0.419793993  | 9.47E-05    | 7.09E-09 | 4 | Tmem208       |
| 0.52561943   | 9.73E-05    | 7.29E-09 | 4 | Daglb         |
| 0.281010695  | 0.000101806 | 7.62E-09 | 4 | Josd1         |
| 0.304135324  | 0.000105232 | 7.88E-09 | 4 | U2surp        |
| 0.815937271  | 0.00010677  | 8.00E-09 | 4 | Vps41         |
| 0.260416122  | 0.000107671 | 8.06E-09 | 4 | Tmem43        |
| 0.534075242  | 0.000108381 | 8.12E-09 | 4 | Fra10ac1      |
| 0.293468572  | 0.000108417 | 8.12E-09 | 4 | Prpf38b       |
| 0.401168238  | 0.000109969 | 8.24E-09 | 4 | 2310036O22Rik |
| 0.958854333  | 0.000111097 | 8.32E-09 | 4 | Map4k2        |
| 0.620659266  | 0.00011245  | 8.42E-09 | 4 | Dync1h1       |
| 0.939353797  | 0.000112685 | 8.44E-09 | 4 | Srpr          |
| 0.318255236  | 0.000112739 | 8.44E-09 | 4 | 2410006H16Rik |
| 0.326835798  | 0.000112795 | 8.45E-09 | 4 | Nceh1         |
| 0.256004274  | 0.000112838 | 8.45E-09 | 4 | Pde4b         |
| 0.287015925  | 0.000113807 | 8.52E-09 | 4 | Jtb           |
| 0.337604161  | 0.000115503 | 8.65E-09 | 4 | Lxn           |
| 0.786453644  | 0.000117424 | 8.79E-09 | 4 | Dcun1d5       |
| 0.607737198  | 0.000119414 | 8.94E-09 | 4 | Stx5a         |
| 0.368014997  | 0.000121719 | 9.12E-09 | 4 | Chd2          |
| 0.347341679  | 0.00012281  | 9.20E-09 | 4 | Bmi1          |
| 0.413614109  | 0.000123501 | 9.25E-09 | 4 | Sec31a        |
| 0.255648725  | 0.000126036 | 9.44E-09 | 4 | Acadm         |
| 0.441584965  | 0.000127188 | 9.53E-09 | 4 | Slc7a6os      |
| 0.399264468  | 0.000127238 | 9.53E-09 | 4 | Lipa          |
| 0.870188945  | 0.000127622 | 9.56E-09 | 4 | Slc50a1       |
| 0.289161468  | 0.000133751 | 1.00E-08 | 4 | Nob1          |
| 0.48222188   | 0.000138188 | 1.03E-08 | 4 | Ubr5          |
| 0.478633555  | 0.000140796 | 1.05E-08 | 4 | Prpf31        |
| 0.351596314  | 0.000145229 | 1.09E-08 | 4 | Dhrs1         |
| 0.303102151  | 0.000153437 | 1.15E-08 | 4 | Phf23         |
| 0.284579821  | 0.000153604 | 1.15E-08 | 4 | Nat9          |
| 0.322931582  | 0.000154513 | 1.16E-08 | 4 | Mtmt14        |
| 0.271571331  | 0.00016266  | 1.22E-08 | 4 | Epc1          |
| 0.482517405  | 0.00016311  | 1.22E-08 | 4 | Opa1          |
| 0.512371976  | 0.000163763 | 1.23E-08 | 4 | Trappc9       |
| 0.782161154  | 0.000164432 | 1.23E-08 | 4 | Extl2         |
| 0.516201178  | 0.000166548 | 1.25E-08 | 4 | Igf2r         |
| 0.483027158  | 0.000166747 | 1.25E-08 | 4 | Zbp1          |
| -1.663303291 | 0.000167481 | 1.25E-08 | 4 | Mrc1          |
| 0.325721023  | 0.000169988 | 1.27E-08 | 4 | Trappc4       |
| 0.273700992  | 0.000170289 | 1.28E-08 | 4 | Smu1          |
| 0.361367217  | 0.00017235  | 1.29E-08 | 4 | Rhoq          |
| 0.355330128  | 0.000177613 | 1.33E-08 | 4 | Ralgapa2      |
| 0.660482941  | 0.000183811 | 1.38E-08 | 4 | Dctn3         |
| 0.320367453  | 0.000186707 | 1.40E-08 | 4 | Lrp1          |

|              |             |          |   |          |
|--------------|-------------|----------|---|----------|
| 0.339204675  | 0.000187776 | 1.41E-08 | 4 | Ndufa10  |
| 0.344142024  | 0.000188951 | 1.42E-08 | 4 | Ccdc107  |
| 0.34520703   | 0.000189068 | 1.42E-08 | 4 | Eif3d    |
| 0.282701994  | 0.000189804 | 1.42E-08 | 4 | Wdr48    |
| 0.345629512  | 0.000190518 | 1.43E-08 | 4 | Vps36    |
| 0.581319921  | 0.00019708  | 1.48E-08 | 4 | Sh2b2    |
| 0.710352239  | 0.000201791 | 1.51E-08 | 4 | Prpf6    |
| 0.52306268   | 0.000202621 | 1.52E-08 | 4 | Kbtbd3   |
| 0.317076637  | 0.000204607 | 1.53E-08 | 4 | Top1     |
| 0.548225025  | 0.000205227 | 1.54E-08 | 4 | Iah1     |
| 0.291631256  | 0.000205928 | 1.54E-08 | 4 | Cct8     |
| 0.36961384   | 0.000206203 | 1.54E-08 | 4 | Psme2b   |
| 0.41594729   | 0.000207369 | 1.55E-08 | 4 | Sppl2a   |
| 0.554661717  | 0.000211058 | 1.58E-08 | 4 | Ptplb    |
| 0.541340656  | 0.000212841 | 1.59E-08 | 4 | Adcy3    |
| 1.089145332  | 0.000220476 | 1.65E-08 | 4 | Hdac7    |
| 0.340933812  | 0.000221604 | 1.66E-08 | 4 | Cnih4    |
| 0.345707808  | 0.000224108 | 1.68E-08 | 4 | Cirh1a   |
| 0.795416631  | 0.000233117 | 1.75E-08 | 4 | Tmem135  |
| 0.319153827  | 0.000236272 | 1.77E-08 | 4 | Tgfb1    |
| 0.816215439  | 0.000241956 | 1.81E-08 | 4 | Dnajc4   |
| 0.382010951  | 0.000244363 | 1.83E-08 | 4 | Ripk3    |
| 0.268702841  | 0.00024849  | 1.86E-08 | 4 | Pop4     |
| 0.489287571  | 0.000251413 | 1.88E-08 | 4 | Cdc16    |
| 0.482602025  | 0.00025256  | 1.89E-08 | 4 | Gatad1   |
| 0.31652942   | 0.000258773 | 1.94E-08 | 4 | Cbl      |
| 0.525140286  | 0.000267031 | 2.00E-08 | 4 | Rasa1    |
| 0.383671369  | 0.000268683 | 2.01E-08 | 4 | Metap1d  |
| 0.359446813  | 0.000280512 | 2.10E-08 | 4 | Clic4    |
| 0.320923207  | 0.00028127  | 2.11E-08 | 4 | Ctdspl   |
| 0.947284177  | 0.000282426 | 2.12E-08 | 4 | Wdr83    |
| 0.447425829  | 0.000286767 | 2.15E-08 | 4 | Pold4    |
| 0.332733915  | 0.000293747 | 2.20E-08 | 4 | Lin37    |
| 0.275698365  | 0.000293826 | 2.20E-08 | 4 | Snap23   |
| 0.351902586  | 0.000294996 | 2.21E-08 | 4 | Rcor1    |
| 0.680399733  | 0.00029788  | 2.23E-08 | 4 | Prkrip1  |
| 0.386638709  | 0.000302592 | 2.27E-08 | 4 | Mtor     |
| 0.494924268  | 0.000302974 | 2.27E-08 | 4 | Bcl2     |
| 0.337489185  | 0.000303593 | 2.27E-08 | 4 | Ric8     |
| 0.440415076  | 0.000310634 | 2.33E-08 | 4 | Chmp7    |
| 0.48494811   | 0.0003125   | 2.34E-08 | 4 | Arl2     |
| 0.613654636  | 0.000313366 | 2.35E-08 | 4 | Vps8     |
| 0.83143347   | 0.000318556 | 2.39E-08 | 4 | Pcp4l1   |
| -1.920145276 | 0.00032261  | 2.42E-08 | 4 | C4b      |
| 0.272081238  | 0.000327427 | 2.45E-08 | 4 | Dnase1l1 |
| 0.473802149  | 0.000335289 | 2.51E-08 | 4 | Galns    |
| 0.644789205  | 0.000339483 | 2.54E-08 | 4 | Tmed1    |
| 0.344689248  | 0.000346235 | 2.59E-08 | 4 | Ssb      |
| 1.322129392  | 0.000348307 | 2.61E-08 | 4 | Rhof     |
| 0.478259711  | 0.000350694 | 2.63E-08 | 4 | Arid2    |
| 0.363638844  | 0.000353488 | 2.65E-08 | 4 | Mfn2     |
| 0.623508093  | 0.000362057 | 2.71E-08 | 4 | Mbp      |
| 0.335207137  | 0.000375957 | 2.82E-08 | 4 | Smek2    |
| -1.0144294   | 0.000382674 | 2.87E-08 | 4 | Coro1a   |
| 0.261796953  | 0.000382712 | 2.87E-08 | 4 | Abhd5    |
| 0.350792042  | 0.00038591  | 2.89E-08 | 4 | Sh3kbp1  |
| 0.293393561  | 0.000391165 | 2.93E-08 | 4 | Map4     |
| -0.576330796 | 0.000397005 | 2.97E-08 | 4 | Rps3a1   |
| 1.164357249  | 0.000406468 | 3.04E-08 | 4 | Trim16   |
| 0.39501866   | 0.000420391 | 3.15E-08 | 4 | Churc1   |
| 0.384425185  | 0.000422967 | 3.17E-08 | 4 | Os9      |

|              |             |          |   |               |
|--------------|-------------|----------|---|---------------|
| 0.386828437  | 0.000426934 | 3.20E-08 | 4 | Cct5          |
| 0.340797847  | 0.000429799 | 3.22E-08 | 4 | Tns3          |
| -1.505183569 | 0.000441316 | 3.31E-08 | 4 | Ccl8          |
| 0.330144791  | 0.00044653  | 3.34E-08 | 4 | Fnip2         |
| 0.250360554  | 0.000449644 | 3.37E-08 | 4 | Snw1          |
| 0.76884463   | 0.00045156  | 3.38E-08 | 4 | Ceacam1       |
| 0.602982962  | 0.000467438 | 3.50E-08 | 4 | Abcg3         |
| 0.578152422  | 0.000485797 | 3.64E-08 | 4 | Ehd1          |
| 0.361182573  | 0.000490035 | 3.67E-08 | 4 | Hcfc1r1       |
| 0.40669372   | 0.000495136 | 3.71E-08 | 4 | Lpxn          |
| 0.745831263  | 0.000497039 | 3.72E-08 | 4 | 1190002N15Rik |
| 0.390521094  | 0.000499294 | 3.74E-08 | 4 | 4931406P16Rik |
| 0.304048808  | 0.000501468 | 3.76E-08 | 4 | Vps29         |
| 0.364618018  | 0.000504766 | 3.78E-08 | 4 | Fundc2        |
| 0.466265307  | 0.000512999 | 3.84E-08 | 4 | Ankrd33b      |
| 0.809300274  | 0.000526377 | 3.94E-08 | 4 | Zfp790        |
| 0.337550923  | 0.000536285 | 4.02E-08 | 4 | Tlr2          |
| 0.472266775  | 0.000544397 | 4.08E-08 | 4 | Sh2d2a        |
| 0.280262191  | 0.000544688 | 4.08E-08 | 4 | Elmo1         |
| 0.373191635  | 0.000548618 | 4.11E-08 | 4 | Fam86         |
| 0.397893561  | 0.000549099 | 4.11E-08 | 4 | Mta3          |
| 0.49455447   | 0.000554765 | 4.15E-08 | 4 | Ap2s1         |
| 0.532774159  | 0.000561837 | 4.21E-08 | 4 | Paf1          |
| 0.296969346  | 0.000605863 | 4.54E-08 | 4 | Rsl1d1        |
| 0.471162301  | 0.000618506 | 4.63E-08 | 4 | Spast         |
| 0.567063594  | 0.00061965  | 4.64E-08 | 4 | Wbp4          |
| 0.269100957  | 0.000628052 | 4.70E-08 | 4 | Bloc1s1       |
| 0.434032136  | 0.000631717 | 4.73E-08 | 4 | Pros1         |
| 0.618640599  | 0.00064     | 4.79E-08 | 4 | Glt8d1        |
| 0.258780532  | 0.000642533 | 4.81E-08 | 4 | Pds5a         |
| 0.331430393  | 0.000649579 | 4.87E-08 | 4 | Nckap1l       |
| 0.816459247  | 0.000680123 | 5.09E-08 | 4 | Zfp131        |
| 0.436676826  | 0.000681353 | 5.10E-08 | 4 | Wrn           |
| 0.276433777  | 0.000681655 | 5.11E-08 | 4 | Tnfsf9        |
| 0.742598502  | 0.000689705 | 5.17E-08 | 4 | Rbm15         |
| 0.438241128  | 0.000700465 | 5.25E-08 | 4 | Usp5          |
| 0.426510359  | 0.000708822 | 5.31E-08 | 4 | Hspa9         |
| 0.307160577  | 0.000709818 | 5.32E-08 | 4 | 2810474O19Rik |
| 0.370240928  | 0.000711747 | 5.33E-08 | 4 | Ube2k         |
| 0.829194351  | 0.000720911 | 5.40E-08 | 4 | Slc16a3       |
| -0.54869862  | 0.000743682 | 5.57E-08 | 4 | Klf6          |
| 0.33986559   | 0.00076971  | 5.76E-08 | 4 | Lmna          |
| 0.302003373  | 0.000769984 | 5.77E-08 | 4 | Ccdc101       |
| 0.289364642  | 0.000775164 | 5.81E-08 | 4 | Uqcrc1        |
| 0.958105037  | 0.000787447 | 5.90E-08 | 4 | Ins16         |
| 0.290687388  | 0.000806971 | 6.04E-08 | 4 | Mapre1        |
| 0.71884214   | 0.000825403 | 6.18E-08 | 4 | Nup50         |
| 0.646023675  | 0.000827561 | 6.20E-08 | 4 | Osgin1        |
| -0.845304243 | 0.000855666 | 6.41E-08 | 4 | Eif4a1        |
| 0.459665885  | 0.000869568 | 6.51E-08 | 4 | 2810428I15Rik |
| 0.343503691  | 0.000896903 | 6.72E-08 | 4 | Diablo        |
| 0.505332298  | 0.000897306 | 6.72E-08 | 4 | Fhod1         |
| -1.569293532 | 0.000901461 | 6.75E-08 | 4 | Thbs1         |
| 0.265271022  | 0.000910656 | 6.82E-08 | 4 | Entpd5        |
| 0.384241472  | 0.000910783 | 6.82E-08 | 4 | Ngrn          |
| 0.255504161  | 0.000914095 | 6.85E-08 | 4 | Lhfpl2        |
| 0.373490869  | 0.000914188 | 6.85E-08 | 4 | AF251705      |
| 0.679519891  | 0.000917828 | 6.87E-08 | 4 | Pibf1         |
| 0.471142662  | 0.000942565 | 7.06E-08 | 4 | Isg20         |
| -0.328277827 | 0.000982368 | 7.36E-08 | 4 | Cfl1          |
| 0.931069309  | 0.000998738 | 7.48E-08 | 4 | Hes1          |

|              |             |          |   |          |
|--------------|-------------|----------|---|----------|
| 0.471468546  | 0.001009847 | 7.56E-08 | 4 | Rbm28    |
| 0.365193277  | 0.001014751 | 7.60E-08 | 4 | Trim27   |
| 0.465769512  | 0.001026582 | 7.69E-08 | 4 | Arcn1    |
| 0.288241779  | 0.001035435 | 7.75E-08 | 4 | Mdp1     |
| -0.657913034 | 0.001046971 | 7.84E-08 | 4 | Rpl3     |
| 0.2691134    | 0.001052009 | 7.88E-08 | 4 | Stt3b    |
| 0.406065188  | 0.001057731 | 7.92E-08 | 4 | Me2      |
| -0.500885119 | 0.001066067 | 7.98E-08 | 4 | Rpl18a   |
| 0.273098197  | 0.001084845 | 8.12E-08 | 4 | Ddx27    |
| 0.455166711  | 0.001088073 | 8.15E-08 | 4 | Psmg2    |
| -1.235839601 | 0.001096167 | 8.21E-08 | 4 | Hmgb2    |
| 0.383229326  | 0.001101443 | 8.25E-08 | 4 | Aamdc    |
| 0.531416538  | 0.001124862 | 8.42E-08 | 4 | Dmxl2    |
| 0.473755979  | 0.001129173 | 8.46E-08 | 4 | Timm50   |
| 0.268037727  | 0.001134759 | 8.50E-08 | 4 | Tmbim4   |
| 0.322750352  | 0.001135249 | 8.50E-08 | 4 | Pgd      |
| 0.482883037  | 0.001148668 | 8.60E-08 | 4 | Golph3l  |
| 0.53150594   | 0.001164689 | 8.72E-08 | 4 | Pqlc2    |
| 0.401099186  | 0.001170828 | 8.77E-08 | 4 | Coa7     |
| 0.380321891  | 0.001198183 | 8.97E-08 | 4 | Uchl5    |
| 0.669146655  | 0.001211003 | 9.07E-08 | 4 | Ccdc22   |
| 0.41324413   | 0.001252525 | 9.38E-08 | 4 | Pnkp     |
| 0.270143378  | 0.001271169 | 9.52E-08 | 4 | Map3k3   |
| 0.604055039  | 0.001271198 | 9.52E-08 | 4 | Stag2    |
| 0.304036834  | 0.001284501 | 9.62E-08 | 4 | Rbm14    |
| 0.269128665  | 0.001307354 | 9.79E-08 | 4 | Pmm1     |
| 0.316011178  | 0.001310134 | 9.81E-08 | 4 | Mtmr6    |
| 0.293891791  | 0.00133415  | 9.99E-08 | 4 | Sel1l    |
| 0.315074828  | 0.001347557 | 1.01E-07 | 4 | Srrm2    |
| 0.348621771  | 0.001437982 | 1.08E-07 | 4 | Grap     |
| 0.308857718  | 0.001444913 | 1.08E-07 | 4 | Sergef   |
| 0.936730251  | 0.001471826 | 1.10E-07 | 4 | Ampd2    |
| 0.80896052   | 0.001495381 | 1.12E-07 | 4 | Mtif3    |
| 0.33162782   | 0.00149925  | 1.12E-07 | 4 | Emilin2  |
| 0.441924564  | 0.001515759 | 1.14E-07 | 4 | Cops4    |
| -0.555044796 | 0.001548328 | 1.16E-07 | 4 | Serinc3  |
| 0.475187853  | 0.001549456 | 1.16E-07 | 4 | Abl2     |
| 0.33412943   | 0.001580052 | 1.18E-07 | 4 | Bud31    |
| 0.44546671   | 0.001583788 | 1.19E-07 | 4 | Lsm1     |
| 0.602658825  | 0.001605183 | 1.20E-07 | 4 | Bcas2    |
| 0.346089074  | 0.001606095 | 1.20E-07 | 4 | Psmc3    |
| 0.561432933  | 0.001652242 | 1.24E-07 | 4 | Nrd1     |
| 0.486303255  | 0.001675932 | 1.26E-07 | 4 | H2-K2    |
| 0.491673407  | 0.0017414   | 1.30E-07 | 4 | Mcur1    |
| 0.579482807  | 0.001743618 | 1.31E-07 | 4 | Desi2    |
| 0.260616733  | 0.001762211 | 1.32E-07 | 4 | Ak2      |
| 0.308483655  | 0.001781375 | 1.33E-07 | 4 | Sh3bp5   |
| 0.347237994  | 0.001842014 | 1.38E-07 | 4 | Gng2     |
| 0.300668836  | 0.001850662 | 1.39E-07 | 4 | Fastkd2  |
| 0.283738779  | 0.001872329 | 1.40E-07 | 4 | Dph3     |
| 0.498354778  | 0.001919287 | 1.44E-07 | 4 | Mrpl11   |
| 0.327501878  | 0.001944728 | 1.46E-07 | 4 | Nav1     |
| 0.286006825  | 0.001957175 | 1.47E-07 | 4 | Kcnq1ot1 |
| 0.2777246    | 0.00196024  | 1.47E-07 | 4 | Gatad2a  |
| 0.558458814  | 0.001984947 | 1.49E-07 | 4 | Kmt2e    |
| 0.584355546  | 0.001993046 | 1.49E-07 | 4 | Nt5dc3   |
| 0.270669108  | 0.002005517 | 1.50E-07 | 4 | Pgl3     |
| 0.467273718  | 0.00204949  | 1.53E-07 | 4 | Usp9x    |
| 0.428310808  | 0.002086114 | 1.56E-07 | 4 | Actr1b   |
| 0.552712489  | 0.002092498 | 1.57E-07 | 4 | Slc5a3   |
| 0.65854901   | 0.002130784 | 1.60E-07 | 4 | Csnk1g2  |

|              |             |          |   |               |
|--------------|-------------|----------|---|---------------|
| 0.316324277  | 0.00216203  | 1.62E-07 | 4 | Zfp710        |
| 0.261314978  | 0.002183707 | 1.64E-07 | 4 | Mtpn          |
| 0.331237686  | 0.002219997 | 1.66E-07 | 4 | Psmb6         |
| -1.26676056  | 0.002234723 | 1.67E-07 | 4 | Ppp4c         |
| 0.624681767  | 0.002239318 | 1.68E-07 | 4 | Fam195a       |
| 0.256809923  | 0.002352052 | 1.76E-07 | 4 | Ppm1g         |
| 0.729042612  | 0.002392493 | 1.79E-07 | 4 | Zkscan6       |
| 0.51217115   | 0.002423521 | 1.82E-07 | 4 | Ddx10         |
| 0.281821859  | 0.002507034 | 1.88E-07 | 4 | Flna          |
| 0.329614715  | 0.00254309  | 1.90E-07 | 4 | Stx7          |
| 0.371744633  | 0.002567928 | 1.92E-07 | 4 | Lrrc75a       |
| 0.348201856  | 0.002576606 | 1.93E-07 | 4 | Tspo          |
| 0.319894645  | 0.002650494 | 1.99E-07 | 4 | Clptm1l       |
| 0.380284708  | 0.002663634 | 1.99E-07 | 4 | Nsmce1        |
| 0.305544922  | 0.00267123  | 2.00E-07 | 4 | Il2rg         |
| 0.355239147  | 0.002673416 | 2.00E-07 | 4 | Nsfl1c        |
| 0.355275155  | 0.002808255 | 2.10E-07 | 4 | Abcd1         |
| 0.394899228  | 0.002830032 | 2.12E-07 | 4 | Bcap31        |
| 0.327189136  | 0.00285017  | 2.13E-07 | 4 | Rrp1          |
| 0.313505078  | 0.002901109 | 2.17E-07 | 4 | Hsbp1         |
| 0.561332711  | 0.002934359 | 2.20E-07 | 4 | A630007B06Rik |
| 1.014612246  | 0.002959439 | 2.22E-07 | 4 | Rmdn3         |
| 0.685181779  | 0.003069608 | 2.30E-07 | 4 | Stx11         |
| 0.497479045  | 0.003207364 | 2.40E-07 | 4 | Txn2          |
| 0.56436112   | 0.003282024 | 2.46E-07 | 4 | Adck4         |
| 0.28309028   | 0.003340332 | 2.50E-07 | 4 | Commdd4       |
| 0.792469012  | 0.003343307 | 2.50E-07 | 4 | Mrpl43        |
| 0.268056842  | 0.003383477 | 2.53E-07 | 4 | Gppbp1        |
| 0.467856235  | 0.003448161 | 2.58E-07 | 4 | St3gal1       |
| 0.387057934  | 0.003463262 | 2.59E-07 | 4 | Fbxo28        |
| 0.291357889  | 0.003473259 | 2.60E-07 | 4 | Glud1         |
| 0.369233403  | 0.003528465 | 2.64E-07 | 4 | Stk40         |
| -0.410142348 | 0.003609822 | 2.70E-07 | 4 | Gm6654        |
| -1.002412537 | 0.003629532 | 2.72E-07 | 4 | Uqcrb         |
| 0.273288233  | 0.003634752 | 2.72E-07 | 4 | Tbc1d5        |
| 0.300438488  | 0.003664937 | 2.74E-07 | 4 | Cttnbp2nl     |
| 0.419629806  | 0.003690196 | 2.76E-07 | 4 | Dctn2         |
| 0.435276735  | 0.003709052 | 2.78E-07 | 4 | Rps6ka3       |
| 0.314063826  | 0.003729894 | 2.79E-07 | 4 | Ptpn1         |
| 0.387792071  | 0.003775647 | 2.83E-07 | 4 | Ufl1          |
| -1.15351616  | 0.003782132 | 2.83E-07 | 4 | Zfp361l       |
| 0.69984879   | 0.003782285 | 2.83E-07 | 4 | Kctd13        |
| 0.294976369  | 0.003816831 | 2.86E-07 | 4 | Gabpa         |
| 0.472495037  | 0.003858037 | 2.89E-07 | 4 | Usp15         |
| 0.539065779  | 0.003921386 | 2.94E-07 | 4 | Lancl2        |
| 0.550044476  | 0.003953796 | 2.96E-07 | 4 | Elf4          |
| 0.286951349  | 0.003983858 | 2.98E-07 | 4 | Zfp868        |
| 0.339046349  | 0.003985164 | 2.98E-07 | 4 | Nucb1         |
| 0.33709674   | 0.00401159  | 3.00E-07 | 4 | Dennd4a       |
| 0.616021501  | 0.004115901 | 3.08E-07 | 4 | Gpr65         |
| 0.477235424  | 0.004197946 | 3.14E-07 | 4 | Mapkap1       |
| 0.391823793  | 0.004297897 | 3.22E-07 | 4 | Hbs1l         |
| 0.345464217  | 0.004348995 | 3.26E-07 | 4 | Enpp1         |
| 0.402827045  | 0.004415365 | 3.31E-07 | 4 | Ctla2a        |
| 0.462658995  | 0.004463122 | 3.34E-07 | 4 | Eif4ebp3      |
| 0.294627754  | 0.004553302 | 3.41E-07 | 4 | Cyp4f18       |
| 0.509924713  | 0.004575567 | 3.43E-07 | 4 | Hbp1          |
| 0.491985779  | 0.004670328 | 3.50E-07 | 4 | Shkbp1        |
| 0.279175536  | 0.004719411 | 3.53E-07 | 4 | Plcb2         |
| 0.297173636  | 0.004745958 | 3.55E-07 | 4 | Atp6v0e       |
| 0.76765367   | 0.004835392 | 3.62E-07 | 4 | Ftsj3         |

|              |             |          |   |           |
|--------------|-------------|----------|---|-----------|
| -1.597502427 | 0.005014177 | 3.76E-07 | 4 | Oas2      |
| 0.318919939  | 0.005101401 | 3.82E-07 | 4 | Ddx21     |
| 0.436126886  | 0.005113786 | 3.83E-07 | 4 | Mapk8     |
| -1.367058707 | 0.005180136 | 3.88E-07 | 4 | Fcgr2b    |
| 0.484275498  | 0.005199826 | 3.89E-07 | 4 | Napsa     |
| 0.6299831    | 0.0052426   | 3.93E-07 | 4 | Tnfaip2   |
| 0.542351198  | 0.005245409 | 3.93E-07 | 4 | Txndc11   |
| 0.477447358  | 0.005269622 | 3.95E-07 | 4 | Unc45a    |
| 0.737034655  | 0.005270378 | 3.95E-07 | 4 | Hint3     |
| 0.395855041  | 0.005295445 | 3.97E-07 | 4 | Hivep3    |
| 0.266981726  | 0.005296707 | 3.97E-07 | 4 | Gpnmb     |
| 0.263099597  | 0.005447327 | 4.08E-07 | 4 | Nt5dc1    |
| 0.424447555  | 0.005594936 | 4.19E-07 | 4 | Ndufb9    |
| -1.140097624 | 0.005603096 | 4.20E-07 | 4 | Jun       |
| 0.373220382  | 0.005675953 | 4.25E-07 | 4 | Glt25d1   |
| 0.251150591  | 0.005797888 | 4.34E-07 | 4 | Gadd45b   |
| -0.289735015 | 0.005846728 | 4.38E-07 | 4 | Lyz2      |
| 0.54170037   | 0.005917527 | 4.43E-07 | 4 | Dennd1c   |
| 0.260054117  | 0.005942569 | 4.45E-07 | 4 | Nup98     |
| 0.339787254  | 0.00602744  | 4.51E-07 | 4 | Sqstm1    |
| 0.556807016  | 0.006077206 | 4.55E-07 | 4 | Tbcd      |
| 0.860778022  | 0.006117365 | 4.58E-07 | 4 | Slc25a13  |
| 0.273828524  | 0.006164171 | 4.62E-07 | 4 | Ufm1      |
| 0.336965723  | 0.006183697 | 4.63E-07 | 4 | Ezr       |
| 0.335875726  | 0.006359469 | 4.76E-07 | 4 | Aff1      |
| 0.339789709  | 0.006369173 | 4.77E-07 | 4 | Rnf185    |
| 0.295577186  | 0.006428671 | 4.81E-07 | 4 | Trp53inp2 |
| 0.409222447  | 0.006529915 | 4.89E-07 | 4 | Vps33b    |
| 0.39755682   | 0.006701942 | 5.02E-07 | 4 | Psmc3     |
| 0.882748911  | 0.006802238 | 5.09E-07 | 4 | Map2k3os  |
| 0.254734673  | 0.006842804 | 5.12E-07 | 4 | Chrac1    |
| -0.536082353 | 0.006911818 | 5.18E-07 | 4 | Rps10     |
| 0.5510248    | 0.006912824 | 5.18E-07 | 4 | Dennd2c   |
| 0.369256273  | 0.006971305 | 5.22E-07 | 4 | Wapal     |
| 0.474678438  | 0.007209913 | 5.40E-07 | 4 | Tbc1d13   |
| 0.270471188  | 0.007251253 | 5.43E-07 | 4 | Map2k4    |
| -0.628743338 | 0.007715451 | 5.78E-07 | 4 | Sepw1     |
| 0.459186086  | 0.007863502 | 5.89E-07 | 4 | Ero1lb    |
| 0.252588697  | 0.008146132 | 6.10E-07 | 4 | Apoa1bp   |
| 0.303192535  | 0.008239722 | 6.17E-07 | 4 | Acadl     |
| 0.364870828  | 0.008256391 | 6.18E-07 | 4 | Stra13    |
| 0.431889431  | 0.008356179 | 6.26E-07 | 4 | Nudt8     |
| 0.571346986  | 0.008457646 | 6.33E-07 | 4 | Bfar      |
| 0.805896787  | 0.008697619 | 6.51E-07 | 4 | Nup155    |
| 0.619688664  | 0.008712925 | 6.53E-07 | 4 | Bcl2l11   |
| 0.288651611  | 0.008723334 | 6.53E-07 | 4 | Lsm6      |
| 0.290039246  | 0.008815999 | 6.60E-07 | 4 | Riok3     |
| 0.301598597  | 0.009035641 | 6.77E-07 | 4 | Glod4     |
| 0.251185399  | 0.009051424 | 6.78E-07 | 4 | Sepn1     |
| 0.616317416  | 0.009066347 | 6.79E-07 | 4 | Narg2     |
| 1.355630884  | 0.009074964 | 6.80E-07 | 4 | Krit1     |
| 0.508801518  | 0.00921586  | 6.90E-07 | 4 | Akap8     |
| 0.491762593  | 0.00934717  | 7.00E-07 | 4 | Phf20     |
| 0.537288727  | 0.009378863 | 7.02E-07 | 4 | Arhgap21  |
| 0.78033227   | 0.009459165 | 7.08E-07 | 4 | Dhrs7b    |
| 0.308452187  | 0.009541909 | 7.15E-07 | 4 | Tax1bp1   |
| -1.316682265 | 0.009623022 | 7.21E-07 | 4 | Rassf2    |
| 0.696037786  | 0.009663856 | 7.24E-07 | 4 | Ccdc174   |
| 0.289165276  | 0.009703793 | 7.27E-07 | 4 | Stat6     |
| 0.352538315  | 0.009945651 | 7.45E-07 | 4 | Lst1      |
| 0.562071108  | 0.009996521 | 7.49E-07 | 4 | Acadvl    |

|              |             |          |   |               |
|--------------|-------------|----------|---|---------------|
| 0.498741312  | 0.010061038 | 7.54E-07 | 4 | Tpm1          |
| -0.277966228 | 0.010116435 | 7.58E-07 | 4 | Mir682        |
| 0.318126524  | 0.010143116 | 7.60E-07 | 4 | Fam53b        |
| 0.340588231  | 0.010204647 | 7.64E-07 | 4 | Lats2         |
| 0.48725732   | 0.010360966 | 7.76E-07 | 4 | Mybpc3        |
| 0.671923544  | 0.010410195 | 7.80E-07 | 4 | Mbip          |
| 0.568829093  | 0.010643148 | 7.97E-07 | 4 | Lonp2         |
| 0.618813719  | 0.011214313 | 8.40E-07 | 4 | Trip4         |
| 0.25574876   | 0.011905143 | 8.92E-07 | 4 | Rbbp7         |
| 0.303082209  | 0.012100515 | 9.06E-07 | 4 | Rnasek        |
| 0.427067762  | 0.012134624 | 9.09E-07 | 4 | Plekha3       |
| 0.582481913  | 0.012350309 | 9.25E-07 | 4 | Senp6         |
| 0.284784743  | 0.012521858 | 9.38E-07 | 4 | Smc3          |
| 0.494628527  | 0.012806414 | 9.59E-07 | 4 | Sssca1        |
| 0.353316176  | 0.013603288 | 1.02E-06 | 4 | Fut11         |
| 0.439469056  | 0.013904313 | 1.04E-06 | 4 | Rell1         |
| 0.30686202   | 0.013936418 | 1.04E-06 | 4 | Cd209a        |
| 0.334336666  | 0.014160481 | 1.06E-06 | 4 | Taldo1        |
| -0.433841035 | 0.014804896 | 1.11E-06 | 4 | Tpm3          |
| 0.379404703  | 0.014934431 | 1.12E-06 | 4 | Zfp180        |
| 0.292352507  | 0.015143704 | 1.13E-06 | 4 | Plagl2        |
| 0.565867618  | 0.015342436 | 1.15E-06 | 4 | Lars          |
| 0.405214595  | 0.015384175 | 1.15E-06 | 4 | Snx14         |
| 0.489662103  | 0.015441727 | 1.16E-06 | 4 | Brpf1         |
| 0.685225915  | 0.015610125 | 1.17E-06 | 4 | Ddhd2         |
| 0.292719347  | 0.015826681 | 1.19E-06 | 4 | Gtf2h5        |
| 0.273119499  | 0.016370738 | 1.23E-06 | 4 | Vps28         |
| 0.269852528  | 0.016855983 | 1.26E-06 | 4 | Mrpl39        |
| -0.955328771 | 0.016896208 | 1.27E-06 | 4 | Ddx39b        |
| 0.277967987  | 0.017205992 | 1.29E-06 | 4 | Mprip         |
| 0.42342008   | 0.01731122  | 1.30E-06 | 4 | Arfgap3       |
| 0.659308834  | 0.017442402 | 1.31E-06 | 4 | Actr8         |
| 0.310341098  | 0.017588612 | 1.32E-06 | 4 | Krtcap2       |
| 0.307008393  | 0.017906535 | 1.34E-06 | 4 | S100a6        |
| 0.255247919  | 0.01829252  | 1.37E-06 | 4 | Emr1          |
| 0.283256563  | 0.018337059 | 1.37E-06 | 4 | Zfand3        |
| 0.424339091  | 0.018618194 | 1.39E-06 | 4 | Pex2          |
| 0.632702831  | 0.018910807 | 1.42E-06 | 4 | Polr3d        |
| 0.611072015  | 0.018993822 | 1.42E-06 | 4 | Fmnl3         |
| 0.730406576  | 0.019036698 | 1.43E-06 | 4 | 1810011H11Rik |
| 0.315410557  | 0.019196208 | 1.44E-06 | 4 | Actr1a        |
| 0.462265626  | 0.019624188 | 1.47E-06 | 4 | Tuba1a        |
| 0.597664974  | 0.019659509 | 1.47E-06 | 4 | Mmd           |
| -0.579545574 | 0.019754052 | 1.48E-06 | 4 | Rpl6          |
| 0.266007071  | 0.019792101 | 1.48E-06 | 4 | Mdh2          |
| 0.526580991  | 0.020048898 | 1.50E-06 | 4 | Impa1         |
| -0.274943393 | 0.020111113 | 1.51E-06 | 4 | Itm2b         |
| -1.906908409 | 0.020388229 | 1.53E-06 | 4 | Cd163         |
| 0.426373224  | 0.020753976 | 1.55E-06 | 4 | Dusp3         |
| 0.391954064  | 0.021806244 | 1.63E-06 | 4 | Srp14         |
| 0.308377523  | 0.022128957 | 1.66E-06 | 4 | Aar2          |
| -1.510410354 | 0.022216255 | 1.66E-06 | 4 | Chil3         |
| 0.258490266  | 0.022224434 | 1.66E-06 | 4 | Tusc2         |
| 0.332662504  | 0.022585559 | 1.69E-06 | 4 | Ankrd13c      |
| -1.034789829 | 0.022916444 | 1.72E-06 | 4 | Ptges3        |
| 0.252389501  | 0.023285113 | 1.74E-06 | 4 | Smc1a         |
| 0.308531212  | 0.023364175 | 1.75E-06 | 4 | Dusp2         |
| 0.568537021  | 0.023957591 | 1.79E-06 | 4 | Tmed3         |
| 0.397803458  | 0.024452233 | 1.83E-06 | 4 | Serpinb6a     |
| -1.547036107 | 0.025044645 | 1.88E-06 | 4 | Sowahc        |
| -1.200318097 | 0.025540949 | 1.91E-06 | 4 | Cmas          |



|              |             |          |   |               |
|--------------|-------------|----------|---|---------------|
| 0.554842509  | 0.025750143 | 1.93E-06 | 4 | Git2          |
| 0.411228884  | 0.027191108 | 2.04E-06 | 4 | Asxl1         |
| 0.352436278  | 0.027696181 | 2.07E-06 | 4 | Tm2d3         |
| 0.25393117   | 0.027956285 | 2.09E-06 | 4 | Fcrls         |
| 0.29890806   | 0.027975659 | 2.10E-06 | 4 | Lnpep         |
| 0.272867821  | 0.028129332 | 2.11E-06 | 4 | Dpcd          |
| 0.806507266  | 0.028245927 | 2.12E-06 | 4 | Dgka          |
| -0.400719382 | 0.028289122 | 2.12E-06 | 4 | Lgmn          |
| 0.463889992  | 0.028407063 | 2.13E-06 | 4 | Mettl14       |
| 0.318300873  | 0.029289271 | 2.19E-06 | 4 | Fam195b       |
| 0.252892987  | 0.02935139  | 2.20E-06 | 4 | lws1          |
| 0.345020759  | 0.030044611 | 2.25E-06 | 4 | Dis3l         |
| 0.365423     | 0.030237786 | 2.26E-06 | 4 | Cstf3         |
| 0.709696092  | 0.030981376 | 2.32E-06 | 4 | Tsr3          |
| 0.358386441  | 0.031153253 | 2.33E-06 | 4 | Mphosph8      |
| 0.419735803  | 0.031616791 | 2.37E-06 | 4 | Tnip2         |
| 0.319369037  | 0.031697764 | 2.37E-06 | 4 | Rgl2          |
| 0.383133438  | 0.032196468 | 2.41E-06 | 4 | Acap2         |
| 0.537097809  | 0.03239658  | 2.43E-06 | 4 | 1600002K03Rik |
| 0.275368764  | 0.03243967  | 2.43E-06 | 4 | Dennd1b       |
| 0.274221453  | 0.03324063  | 2.49E-06 | 4 | Aup1          |
| 0.369122131  | 0.033287703 | 2.49E-06 | 4 | 2810004N23Rik |
| -0.625527713 | 0.034137711 | 2.56E-06 | 4 | Ly6e          |
| 0.475808665  | 0.034645357 | 2.59E-06 | 4 | Atpaf2        |
| -1.099291123 | 0.037070381 | 2.78E-06 | 4 | Ssfa2         |
| 0.258326218  | 0.037274885 | 2.79E-06 | 4 | Tmem256       |
| 0.322784617  | 0.037489751 | 2.81E-06 | 4 | Nkiras2       |
| 0.386506931  | 0.037804495 | 2.83E-06 | 4 | Epb4.1        |
| -0.271938761 | 0.037813576 | 2.83E-06 | 4 | NP-904328.1   |
| 0.873975894  | 0.03792522  | 2.84E-06 | 4 | Pex11b        |
| 0.264747246  | 0.038279285 | 2.87E-06 | 4 | Stk4          |
| 0.383150256  | 0.039419247 | 2.95E-06 | 4 | Dync1li1      |
| 0.464765836  | 0.039571957 | 2.96E-06 | 4 | Ccdc59        |
| 0.260712265  | 0.040013253 | 3.00E-06 | 4 | Ier3ip1       |
| 0.559823612  | 0.040304165 | 3.02E-06 | 4 | Gas2l1        |
| 0.731660986  | 0.040392082 | 3.03E-06 | 4 | Pdxdc1        |
| 0.32150496   | 0.040620255 | 3.04E-06 | 4 | Rab11a        |
| 0.260247777  | 0.041121883 | 3.08E-06 | 4 | Pfdn1         |
| 0.30287171   | 0.042557968 | 3.19E-06 | 4 | Chmp2a        |
| 0.256540148  | 0.042620378 | 3.19E-06 | 4 | Osgep         |
| 0.270998231  | 0.043002869 | 3.22E-06 | 4 | Agap1         |
| 0.28189575   | 0.043063846 | 3.23E-06 | 4 | Nars          |
| 0.270321012  | 0.043265684 | 3.24E-06 | 4 | 0610037L13Rik |
| 0.359981185  | 0.043349893 | 3.25E-06 | 4 | Ptpn12        |
| 0.617187004  | 0.043485264 | 3.26E-06 | 4 | Cyp4f13       |
| 0.271756787  | 0.043596735 | 3.27E-06 | 4 | Cox19         |
| -0.656107351 | 0.044134602 | 3.31E-06 | 4 | Rpl35a        |
| -1.871113124 | 0.044529116 | 3.34E-06 | 4 | F13a1         |
| 0.290378039  | 0.045374754 | 3.40E-06 | 4 | Slc39a7       |
| 0.312263162  | 0.046210088 | 3.46E-06 | 4 | Mob3a         |
| 0.505175161  | 0.046614091 | 3.49E-06 | 4 | Apoc4         |
| 0.529663236  | 0.046943    | 3.52E-06 | 4 | Mms19         |
| 0.325025973  | 0.047313147 | 3.54E-06 | 4 | Foxk1         |
| 0.463262365  | 0.048551233 | 3.64E-06 | 4 | Gabarapl1     |
| 0.621955542  | 0.05045534  | 3.78E-06 | 4 | Ate1          |
| 0.325035466  | 0.051266444 | 3.84E-06 | 4 | Csnk1e        |
| 0.258144013  | 0.051587235 | 3.86E-06 | 4 | Creg1         |
| 0.477648035  | 0.052093053 | 3.90E-06 | 4 | Elmsan1       |
| 0.969272443  | 0.052120059 | 3.90E-06 | 4 | Smpdl3b       |
| -1.405066014 | 0.05280626  | 3.95E-06 | 4 | Acat1         |
| -1.012730969 | 0.052860417 | 3.96E-06 | 4 | Tmed2         |

|              |             |          |   |               |
|--------------|-------------|----------|---|---------------|
| -1.118896517 | 0.052862174 | 3.96E-06 | 4 | Mmp19         |
| 0.46979936   | 0.05315845  | 3.98E-06 | 4 | Hsd17b10      |
| 0.577281778  | 0.053447326 | 4.00E-06 | 4 | Slc4a2        |
| 0.361666312  | 0.053645359 | 4.02E-06 | 4 | Uqcr10        |
| 0.470746562  | 0.054457929 | 4.08E-06 | 4 | Slamf7        |
| 0.453687961  | 0.055824267 | 4.18E-06 | 4 | Ercc1         |
| -1.549329621 | 0.056741126 | 4.25E-06 | 4 | Cmah          |
| 0.63324469   | 0.057635497 | 4.32E-06 | 4 | Fam120b       |
| 0.25731636   | 0.060818714 | 4.56E-06 | 4 | Rtn4          |
| 0.259665269  | 0.063414669 | 4.75E-06 | 4 | Arl4a         |
| 0.257481508  | 0.063836176 | 4.78E-06 | 4 | Snx15         |
| 0.285899184  | 0.065259905 | 4.89E-06 | 4 | Slc1a5        |
| 0.275244265  | 0.065560552 | 4.91E-06 | 4 | Bcl2l13       |
| 0.579449313  | 0.068586944 | 5.14E-06 | 4 | Cd22          |
| 0.283726999  | 0.069058943 | 5.17E-06 | 4 | Tnip3         |
| -0.279743503 | 0.069582527 | 5.21E-06 | 4 | Mrps15        |
| 0.268201965  | 0.069753241 | 5.22E-06 | 4 | Ndufs8        |
| -0.25560954  | 0.070075425 | 5.25E-06 | 4 | Rpl18         |
| 0.862950367  | 0.071262739 | 5.34E-06 | 4 | Faf1          |
| 0.520911425  | 0.07134637  | 5.34E-06 | 4 | Gmps          |
| 0.327856043  | 0.071622876 | 5.36E-06 | 4 | Rab10os       |
| 0.288192221  | 0.071717156 | 5.37E-06 | 4 | Ssu72         |
| 0.321911269  | 0.072253777 | 5.41E-06 | 4 | Sms           |
| -0.609990213 | 0.073863575 | 5.53E-06 | 4 | Rps15a        |
| 0.299108781  | 0.07425053  | 5.56E-06 | 4 | Zwint         |
| 0.36927467   | 0.074420621 | 5.57E-06 | 4 | Acvrl1        |
| 0.503236179  | 0.076228111 | 5.71E-06 | 4 | Surf1         |
| 0.429640133  | 0.076797462 | 5.75E-06 | 4 | Rgs12         |
| 0.354495653  | 0.078499624 | 5.88E-06 | 4 | Cmklr1        |
| 0.626518519  | 0.08331367  | 6.24E-06 | 4 | Manea         |
| 0.257723817  | 0.08374077  | 6.27E-06 | 4 | Smpdl3a       |
| -1.155464035 | 0.085662571 | 6.42E-06 | 4 | Ncstn         |
| 0.611430462  | 0.086497538 | 6.48E-06 | 4 | Xrn1          |
| 1.070936783  | 0.088174791 | 6.60E-06 | 4 | Pip5k1a       |
| 0.310844519  | 0.090841079 | 6.80E-06 | 4 | Rpl31         |
| 0.445138097  | 0.092627118 | 6.94E-06 | 4 | Noa1          |
| 0.271777651  | 0.097267505 | 7.28E-06 | 4 | Ppp2r4        |
| 0.441168276  | 0.097664824 | 7.31E-06 | 4 | 2210013O21Rik |
| 0.315882134  | 0.098040577 | 7.34E-06 | 4 | Grap2         |
| -0.614958274 | 0.099761751 | 7.47E-06 | 4 | Cebpa         |
| 0.419128731  | 0.101276276 | 7.59E-06 | 4 | Nop14         |
| 0.272537482  | 0.1034169   | 7.75E-06 | 4 | Avl9          |
| 0.65050323   | 0.103587353 | 7.76E-06 | 4 | Sap30bp       |
| 0.693579573  | 0.103750157 | 7.77E-06 | 4 | Lztr1         |
| 0.312025729  | 0.104006903 | 7.79E-06 | 4 | Vezf1         |
| 0.306753976  | 0.104240019 | 7.81E-06 | 4 | Efcab14       |
| 0.260457834  | 0.107406956 | 8.04E-06 | 4 | Sec62         |
| 0.314131905  | 0.110908513 | 8.31E-06 | 4 | Dr1           |
| 0.674711808  | 0.111419541 | 8.34E-06 | 4 | Tecpr1        |
| 0.278910228  | 0.112619587 | 8.43E-06 | 4 | Cox6a1        |
| 0.323906981  | 0.117649684 | 8.81E-06 | 4 | Incenp        |
| 0.255582283  | 0.122176641 | 9.15E-06 | 4 | Rab10         |
| 0.75290592   | 0.125231529 | 9.38E-06 | 4 | Ccs           |
| 0.364026422  | 0.127023585 | 9.51E-06 | 4 | Vasp          |
| 1.535674939  | 0.130908603 | 9.80E-06 | 4 | Ccdc28a       |
| 1.176434307  | 0.131365878 | 9.84E-06 | 4 | Cyb561d2      |
| 0.527037716  | 0.133483401 | 1.00E-05 | 4 | Adam15        |
| 0.518362512  | 0.135481084 | 1.01E-05 | 4 | Tpst2         |
| 0.452613418  | 0.136535216 | 1.02E-05 | 4 | Guf1          |
| 0.67455474   | 0.138179358 | 1.03E-05 | 4 | Ipo4          |
| 0.713207966  | 0.13971936  | 1.05E-05 | 4 | Tyk2          |

|              |             |          |   |               |
|--------------|-------------|----------|---|---------------|
| 0.383584971  | 0.142178875 | 1.06E-05 | 4 | Pofut2        |
| -0.322480293 | 0.142313335 | 1.07E-05 | 4 | C1qc          |
| -0.713680924 | 0.14284744  | 1.07E-05 | 4 | Rps25         |
| 0.260889068  | 0.144921023 | 1.09E-05 | 4 | Pon2          |
| 0.27975256   | 0.150643742 | 1.13E-05 | 4 | Qars          |
| 0.665309804  | 0.152082645 | 1.14E-05 | 4 | Vps51         |
| 0.368879553  | 0.154703184 | 1.16E-05 | 4 | Vapb          |
| 0.616258196  | 0.154752842 | 1.16E-05 | 4 | Mef2d         |
| 0.433831956  | 0.157503797 | 1.18E-05 | 4 | Gfm1          |
| -0.847368359 | 0.160812347 | 1.20E-05 | 4 | Rps16         |
| 0.287323574  | 0.165809709 | 1.24E-05 | 4 | Gpatch2l      |
| 0.569714432  | 0.166270075 | 1.25E-05 | 4 | Zfp68         |
| 0.522989003  | 0.166654812 | 1.25E-05 | 4 | Pdrg1         |
| -1.174240397 | 0.17037653  | 1.28E-05 | 4 | Ewsr1         |
| -1.464303326 | 0.170457423 | 1.28E-05 | 4 | Slfn5         |
| 0.253888201  | 0.182341255 | 1.37E-05 | 4 | Fgr           |
| 0.345304648  | 0.18259045  | 1.37E-05 | 4 | Cinp          |
| 1.047236269  | 0.182621036 | 1.37E-05 | 4 | 6430548M08Rik |
| 0.491232511  | 0.186432379 | 1.40E-05 | 4 | Abcf1         |
| 0.31345329   | 0.193920171 | 1.45E-05 | 4 | Zmat5         |
| 0.702707309  | 0.195300459 | 1.46E-05 | 4 | Speg          |
| 0.549049446  | 0.202863672 | 1.52E-05 | 4 | 1700112E06Rik |
| 0.333316304  | 0.203699629 | 1.53E-05 | 4 | 2010107E04Rik |
| 0.262181879  | 0.204895802 | 1.53E-05 | 4 | D1Erttd622e   |
| 0.257475336  | 0.208994954 | 1.57E-05 | 4 | Zc3h7a        |
| 0.272321237  | 0.211831745 | 1.59E-05 | 4 | Npy           |
| 0.250827216  | 0.212947011 | 1.59E-05 | 4 | Cox8a         |
| 0.425422382  | 0.215743731 | 1.62E-05 | 4 | Snrpb2        |
| 0.276308924  | 0.219280304 | 1.64E-05 | 4 | Orai1         |
| 0.738476484  | 0.219835115 | 1.65E-05 | 4 | Zak           |
| 0.965104353  | 0.221312581 | 1.66E-05 | 4 | Cd244         |
| 0.268665594  | 0.222542539 | 1.67E-05 | 4 | Ggh           |
| -0.351379231 | 0.22463056  | 1.68E-05 | 4 | Ccnd1         |
| 0.631717124  | 0.225270075 | 1.69E-05 | 4 | Brap          |
| 0.341181982  | 0.225648117 | 1.69E-05 | 4 | Gtf3a         |
| 0.270846157  | 0.234074376 | 1.75E-05 | 4 | Ehbp1l1       |
| -1.219140404 | 0.234808619 | 1.76E-05 | 4 | Ifi204        |
| -0.458883044 | 0.23524219  | 1.76E-05 | 4 | Mir703        |
| 0.270737194  | 0.237399002 | 1.78E-05 | 4 | Ssh2          |
| -1.158395569 | 0.239581506 | 1.79E-05 | 4 | Gpr183        |
| 0.429045949  | 0.239755568 | 1.80E-05 | 4 | Pitpnb        |
| 0.507557363  | 0.245966919 | 1.84E-05 | 4 | Eif4ebp1      |
| 0.615319151  | 0.247304921 | 1.85E-05 | 4 | Tmco4         |
| 0.328953559  | 0.250569128 | 1.88E-05 | 4 | Txndc9        |
| 0.340987183  | 0.254375711 | 1.91E-05 | 4 | Stam          |
| 0.389305187  | 0.254795076 | 1.91E-05 | 4 | Nf2           |
| 0.255741911  | 0.254964444 | 1.91E-05 | 4 | Scamp4        |
| 0.314788723  | 0.260076435 | 1.95E-05 | 4 | Ccl5          |
| 0.752145962  | 0.262077771 | 1.96E-05 | 4 | Ldlrad4       |
| -0.529975683 | 0.266260703 | 1.99E-05 | 4 | Rps19         |
| 0.30704151   | 0.267577771 | 2.00E-05 | 4 | Ube3b         |
| 0.443978913  | 0.272136346 | 2.04E-05 | 4 | Cgrrf1        |
| -1.464738138 | 0.273373654 | 2.05E-05 | 4 | Tbc1d4        |
| 0.611806548  | 0.275023656 | 2.06E-05 | 4 | Agpat6        |
| -1.106412905 | 0.279923222 | 2.10E-05 | 4 | Hmox1         |
| 0.259773431  | 0.284440393 | 2.13E-05 | 4 | Tmem183a      |
| -1.151437946 | 0.288126498 | 2.16E-05 | 4 | Abi3          |
| 0.682988907  | 0.294398754 | 2.20E-05 | 4 | Xpnpep1       |
| 1.084600222  | 0.296233721 | 2.22E-05 | 4 | Taf1          |
| -0.485009629 | 0.296892316 | 2.22E-05 | 4 | Rps7          |
| 0.604352243  | 0.297039575 | 2.22E-05 | 4 | Ebi3          |

|              |             |          |   |               |
|--------------|-------------|----------|---|---------------|
| 0.455261202  | 0.301818553 | 2.26E-05 | 4 | Ggnbp2        |
| 0.323227366  | 0.305301758 | 2.29E-05 | 4 | Pogz          |
| 0.334232861  | 0.312101198 | 2.34E-05 | 4 | 2310009A05Rik |
| 0.34137043   | 0.316347142 | 2.37E-05 | 4 | Fam3a         |
| 0.311724092  | 0.325694797 | 2.44E-05 | 4 | Brd4          |
| 0.510500326  | 0.336206021 | 2.52E-05 | 4 | Clip1         |
| 0.436830872  | 0.338613178 | 2.54E-05 | 4 | Kif1c         |
| 0.291900972  | 0.344749622 | 2.58E-05 | 4 | Emc10         |
| 0.256369215  | 0.349944143 | 2.62E-05 | 4 | Hdlbp         |
| 1.20666069   | 0.350621272 | 2.63E-05 | 4 | Il18bp        |
| 0.309964996  | 0.358162941 | 2.68E-05 | 4 | Mrpl37        |
| 0.329829941  | 0.363054859 | 2.72E-05 | 4 | Med13         |
| -0.788456641 | 0.377025505 | 2.82E-05 | 4 | Btf3          |
| 0.255941724  | 0.384455725 | 2.88E-05 | 4 | Atxn1         |
| -1.013271773 | 0.386462174 | 2.89E-05 | 4 | Atxn2         |
| 0.280899729  | 0.40022868  | 3.00E-05 | 4 | Wars          |
| -1.07014412  | 0.404079438 | 3.03E-05 | 4 | Hnrnpl        |
| -1.519768516 | 0.414315524 | 3.10E-05 | 4 | Fgl2          |
| 0.323922717  | 0.415456287 | 3.11E-05 | 4 | Cry1          |
| 0.308196492  | 0.425155917 | 3.18E-05 | 4 | Pea15a        |
| 0.305471109  | 0.42629281  | 3.19E-05 | 4 | Ubl5          |
| -1.358250655 | 0.457776926 | 3.43E-05 | 4 | Rnasel        |
| 0.489413148  | 0.461467601 | 3.46E-05 | 4 | Fbxo3         |
| 1.288556012  | 0.472500791 | 3.54E-05 | 4 | Cdadcl        |
| 0.496127296  | 0.498649244 | 3.73E-05 | 4 | Bhlhe41       |
| 1.010175141  | 0.508878175 | 3.81E-05 | 4 | Supv3l1       |
| 0.308178701  | 0.512687219 | 3.84E-05 | 4 | Ccdc47        |
| 0.458442688  | 0.522130415 | 3.91E-05 | 4 | Yeats2        |
| 0.339262689  | 0.53083359  | 3.98E-05 | 4 | Ube3c         |
| 0.25709405   | 0.53155096  | 3.98E-05 | 4 | Tubg1         |
| 0.265884329  | 0.537051949 | 4.02E-05 | 4 | Rnh1          |
| 0.281792253  | 0.543859661 | 4.07E-05 | 4 | Camsap2       |
| -0.686185098 | 0.545196758 | 4.08E-05 | 4 | Matk          |
| 0.432917128  | 0.547557611 | 4.10E-05 | 4 | Srxn1         |
| 0.356311471  | 0.569942574 | 4.27E-05 | 4 | Xylt2         |
| -0.805688609 | 0.584718611 | 4.38E-05 | 4 | Aftph         |
| 0.254206751  | 0.617109038 | 4.62E-05 | 4 | 1700017B05Rik |
| 0.473613275  | 0.621302064 | 4.65E-05 | 4 | AU040320      |
| -1.226317763 | 0.63585865  | 4.76E-05 | 4 | Safb          |
| 0.631358925  | 0.645160215 | 4.83E-05 | 4 | Klrb1b        |
| -0.700389231 | 0.677715627 | 5.08E-05 | 4 | Atp5l         |
| 0.477396082  | 0.679495499 | 5.09E-05 | 4 | Polb          |
| -0.704668731 | 0.682023824 | 5.11E-05 | 4 | Ywhah         |
| 1.061360162  | 0.699134259 | 5.24E-05 | 4 | Glcci1        |
| -0.993622807 | 0.73338645  | 5.49E-05 | 4 | Atp5k         |
| 0.294113384  | 0.755832564 | 5.66E-05 | 4 | Sdhd          |
| -0.382775557 | 0.761655979 | 5.70E-05 | 4 | Gm4832        |
| 0.356505326  | 0.762999886 | 5.71E-05 | 4 | Mylipl        |
| -0.542608524 | 0.767782412 | 5.75E-05 | 4 | Ifitm2        |
| 0.433822646  | 0.789507086 | 5.91E-05 | 4 | Tulp4         |
| 0.310111689  | 0.806665203 | 6.04E-05 | 4 | Ttc33         |
| 0.360858461  | 0.807259917 | 6.05E-05 | 4 | Atm           |
| 0.293487108  | 0.819677688 | 6.14E-05 | 4 | Gstm1         |
| 0.332579118  | 0.822230618 | 6.16E-05 | 4 | Fas           |
| 0.619963805  | 0.826547162 | 6.19E-05 | 4 | Trak2         |
| -1.118760078 | 0.827546494 | 6.20E-05 | 4 | Dcaf8         |
| 0.399962488  | 0.835821292 | 6.26E-05 | 4 | Irs2          |
| 0.353692472  | 0.857507486 | 6.42E-05 | 4 | Lyar          |
| 0.28694356   | 0.867136111 | 6.49E-05 | 4 | Hmgxb3        |
| 0.308226504  | 0.868353964 | 6.50E-05 | 4 | Ubn1          |
| 0.270439173  | 0.881126985 | 6.60E-05 | 4 | Uqcrq         |

|              |             |           |   |               |
|--------------|-------------|-----------|---|---------------|
| 0.340404478  | 0.881398971 | 6.60E-05  | 4 | Tbcc          |
| 0.373250291  | 0.944078445 | 7.07E-05  | 4 | Ncor1         |
| 0.961273674  | 0.945577604 | 7.08E-05  | 4 | Ano10         |
| 0.407215223  | 0.971965697 | 7.28E-05  | 4 | Plekha2       |
| -1.012495074 | 0.973679599 | 7.29E-05  | 4 | Ctnnb1        |
| 0.276969116  | 0.977580062 | 7.32E-05  | 4 | Med6          |
| -0.399261003 | 0.979393968 | 7.34E-05  | 4 | Gm6548        |
| 0.381801702  | 0.985266613 | 7.38E-05  | 4 | Gimap6        |
| 0.438219331  | 1           | 7.52E-05  | 4 | Srebf1        |
| 0.284937538  | 1           | 7.55E-05  | 4 | Gclm          |
| 0.295529414  | 1           | 7.82E-05  | 4 | Pilrb1        |
| 0.252480447  | 1           | 7.88E-05  | 4 | Degs1         |
| 0.418361292  | 1           | 8.11E-05  | 4 | Rora          |
| 0.314661528  | 1           | 8.42E-05  | 4 | Ppp1r15b      |
| 0.419782186  | 1           | 8.49E-05  | 4 | Tomm34        |
| 0.265058287  | 1           | 8.85E-05  | 4 | Gsdmd         |
| 0.32098781   | 1           | 8.88E-05  | 4 | Psen1         |
| 0.317646897  | 1           | 8.95E-05  | 4 | Adrbk1        |
| -1.419765917 | 1           | 9.05E-05  | 4 | Rcn3          |
| 0.570880026  | 1           | 9.06E-05  | 4 | Stxbp6        |
| -0.587170493 | 1           | 9.13E-05  | 4 | Sepp1         |
| 0.29843746   | 1           | 9.60E-05  | 4 | Arl11         |
| 0.337357886  | 1           | 9.76E-05  | 4 | Aimp1         |
| -0.359978979 | 1           | 9.79E-05  | 4 | Sap30         |
| 0.330558664  | 1           | 9.97E-05  | 4 | 2310039H08Rik |
| 1.43970006   | 1           | 0.0001013 | 4 | Slc25a38      |
| 0.318561775  | 1           | 0.0001019 | 4 | Mafg          |
| 0.529159074  | 1           | 0.0001049 | 4 | Tppp3         |
| -1.433554051 | 1           | 0.0001061 | 4 | Ccl7          |
| 0.406015271  | 1           | 0.0001072 | 4 | Ctbp2         |
| 0.323866635  | 1           | 0.0001075 | 4 | Ocrl          |
| -1.058462992 | 1           | 0.0001091 | 4 | Golga2        |
| 0.44215311   | 1           | 0.000111  | 4 | Uspl1         |
| 0.455258766  | 1           | 0.000112  | 4 | Shc1          |
| 0.387969342  | 1           | 0.0001146 | 4 | Pomt1         |
| 0.368774315  | 1           | 0.0001184 | 4 | Crebbp        |
| 0.607295099  | 1           | 0.0001185 | 4 | Hspa13        |
| 0.726703212  | 1           | 0.0001193 | 4 | Arl13b        |
| 0.369387308  | 1           | 0.0001195 | 4 | Alkbh1        |
| 0.274855172  | 1           | 0.0001248 | 4 | Mga           |
| 0.298493843  | 1           | 0.0001287 | 4 | Psmb4         |
| -0.495889279 | 1           | 0.0001288 | 4 | Rps8          |
| 0.259713007  | 1           | 0.0001304 | 4 | Hint1         |
| 0.602734835  | 1           | 0.000131  | 4 | Myo7a         |
| 0.272451571  | 1           | 0.0001313 | 4 | Trmt1         |
| 0.289998652  | 1           | 0.0001326 | 4 | Ndufa9        |
| -1.221404831 | 1           | 0.0001337 | 4 | Wdfy3         |
| 0.325746626  | 1           | 0.0001343 | 4 | Abhd17c       |
| -0.743671832 | 1           | 0.0001361 | 4 | Ndufb4        |
| 0.367418789  | 1           | 0.000138  | 4 | Trim26        |
| -0.666276063 | 1           | 0.0001403 | 4 | Mir684-1      |
| 0.549482086  | 1           | 0.0001417 | 4 | Synj2bp       |
| 0.432263719  | 1           | 0.0001422 | 4 | Taf15         |
| 0.560430985  | 1           | 0.0001433 | 4 | Madd          |
| -0.862019961 | 1           | 0.0001455 | 4 | Gmfg          |
| 0.291794162  | 1           | 0.0001462 | 4 | Tmem164       |
| 0.455916508  | 1           | 0.0001469 | 4 | Cdc40         |
| 0.303693725  | 1           | 0.000148  | 4 | Maea          |
| 0.589757794  | 1           | 0.0001535 | 4 | Lrrc8a        |
| 0.513251083  | 1           | 0.000154  | 4 | 1810026J23Rik |
| 0.526877307  | 1           | 0.000161  | 4 | Gse1          |

|              |   |           |   |               |
|--------------|---|-----------|---|---------------|
| -1.422800621 | 1 | 0.0001614 | 4 | Stard8        |
| 0.454287293  | 1 | 0.0001616 | 4 | Hgs           |
| -1.12583559  | 1 | 0.0001654 | 4 | Nqo2          |
| -0.571373918 | 1 | 0.0001655 | 4 | Prcp          |
| 0.355253319  | 1 | 0.0001719 | 4 | Nupr1         |
| -1.072565267 | 1 | 0.0001761 | 4 | Sft2d1        |
| -0.28944071  | 1 | 0.0001829 | 4 | Crip1         |
| 0.322717962  | 1 | 0.000186  | 4 | BC028528      |
| 0.953115098  | 1 | 0.0001879 | 4 | Tjp2          |
| -1.173432447 | 1 | 0.0001893 | 4 | Nfil3         |
| -1.385678182 | 1 | 0.0001902 | 4 | Gda           |
| -0.943583961 | 1 | 0.0001915 | 4 | Lman1         |
| 0.776181437  | 1 | 0.0001969 | 4 | Zpr1          |
| -0.255753102 | 1 | 0.0002023 | 4 | Dusp22        |
| -1.084736734 | 1 | 0.0002028 | 4 | Nkap          |
| 0.420199428  | 1 | 0.0002036 | 4 | Ap1m1         |
| 0.29880067   | 1 | 0.0002053 | 4 | Klhdc3        |
| 0.269917266  | 1 | 0.0002058 | 4 | Cdc37l1       |
| -0.364198653 | 1 | 0.0002065 | 4 | Shfm1         |
| -0.276570328 | 1 | 0.0002091 | 4 | Fam98c        |
| 0.457799819  | 1 | 0.0002102 | 4 | Bcl2l1        |
| 0.287937468  | 1 | 0.0002123 | 4 | Nod1          |
| 0.34302475   | 1 | 0.0002141 | 4 | Adap1         |
| -1.061097709 | 1 | 0.0002203 | 4 | Adap2         |
| 0.567280775  | 1 | 0.0002225 | 4 | Fhl3          |
| 0.250521136  | 1 | 0.0002254 | 4 | Syk           |
| 0.349194827  | 1 | 0.0002257 | 4 | Ube2j1        |
| 0.439705016  | 1 | 0.0002267 | 4 | Samd8         |
| 0.347887117  | 1 | 0.0002296 | 4 | Spns1         |
| -1.192890711 | 1 | 0.0002397 | 4 | Mfsd7b        |
| 0.301174873  | 1 | 0.0002416 | 4 | Coq10a        |
| 0.323113124  | 1 | 0.0002445 | 4 | Trem1         |
| -0.727050149 | 1 | 0.0002528 | 4 | Gnb1          |
| -0.983032565 | 1 | 0.0002534 | 4 | Khdrbs1       |
| 0.353140419  | 1 | 0.0002545 | 4 | Fbxo32        |
| 0.414041582  | 1 | 0.0002575 | 4 | Rps6kb1       |
| -0.423983564 | 1 | 0.0002594 | 4 | Rps2          |
| 0.274904258  | 1 | 0.0002621 | 4 | Lcmt1         |
| 0.581808181  | 1 | 0.0002675 | 4 | Xrcc6         |
| -0.942919091 | 1 | 0.0002727 | 4 | Cox7c         |
| 0.61628857   | 1 | 0.0002782 | 4 | Vhl           |
| 0.346663759  | 1 | 0.0002801 | 4 | Aldh3b1       |
| 1.02742208   | 1 | 0.0002816 | 4 | Ago3          |
| -1.212299472 | 1 | 0.0002817 | 4 | Vrk2          |
| 0.311256579  | 1 | 0.0002817 | 4 | Eif3i         |
| -1.011914418 | 1 | 0.0002948 | 4 | Arf5          |
| 0.31242183   | 1 | 0.0003004 | 4 | Rpl7          |
| -1.065355182 | 1 | 0.0003046 | 4 | Abl1          |
| 0.351670902  | 1 | 0.0003068 | 4 | Cdk5          |
| -1.008923966 | 1 | 0.0003083 | 4 | Rsrp1         |
| 0.332956126  | 1 | 0.0003112 | 4 | Ssr1          |
| 0.262408676  | 1 | 0.0003171 | 4 | Rnf187        |
| 0.880974721  | 1 | 0.0003195 | 4 | Plxdc2        |
| 0.413514254  | 1 | 0.0003232 | 4 | Kif2a         |
| 0.422289539  | 1 | 0.0003249 | 4 | Emc9          |
| 0.50200564   | 1 | 0.0003385 | 4 | 5830432E09Rik |
| -1.095846769 | 1 | 0.0003448 | 4 | Vcam1         |
| 0.371120384  | 1 | 0.0003501 | 4 | Parvb         |
| 0.390116436  | 1 | 0.0003604 | 4 | Aph1a         |
| -0.967887369 | 1 | 0.0003676 | 4 | Ccl9          |
| -1.089487564 | 1 | 0.0003757 | 4 | Chuk          |

|              |   |           |   |               |
|--------------|---|-----------|---|---------------|
| -1.363335844 | 1 | 0.0003792 | 4 | Gsr           |
| 0.355671473  | 1 | 0.0003865 | 4 | Cd84          |
| 0.443970729  | 1 | 0.0003911 | 4 | Cdk6          |
| 0.403840569  | 1 | 0.0003924 | 4 | Ercc3         |
| 0.534085648  | 1 | 0.0003973 | 4 | Ehmt1         |
| -0.275957771 | 1 | 0.000403  | 4 | Nostrin       |
| -0.710151401 | 1 | 0.0004061 | 4 | Tpt1          |
| 0.260962455  | 1 | 0.0004115 | 4 | Slfn8         |
| 0.250669757  | 1 | 0.0004139 | 4 | Fam172a       |
| -0.862790822 | 1 | 0.0004207 | 4 | Atp5g1        |
| 0.3738736    | 1 | 0.0004216 | 4 | Eif3f         |
| -0.954623867 | 1 | 0.0004245 | 4 | Zfp703        |
| 0.293448951  | 1 | 0.0004772 | 4 | Ncoa5         |
| -0.363704381 | 1 | 0.0004859 | 4 | Cxcl10        |
| 0.575714741  | 1 | 0.0004874 | 4 | Rassf3        |
| 0.364576614  | 1 | 0.0004922 | 4 | Frmd8         |
| -0.554090277 | 1 | 0.0005101 | 4 | Arpc3         |
| -0.438182219 | 1 | 0.000511  | 4 | 2900060B14Rik |
| 0.318258907  | 1 | 0.0005329 | 4 | Vdac1         |
| 0.661140766  | 1 | 0.0005526 | 4 | Ing1          |
| 1.058245206  | 1 | 0.0005538 | 4 | Ogfrl1        |
| -0.488969079 | 1 | 0.0005799 | 4 | Psemb7        |
| -0.494965723 | 1 | 0.0005814 | 4 | Btg1          |
| 0.411935728  | 1 | 0.0005834 | 4 | Cdc73         |
| -0.963648744 | 1 | 0.0005836 | 4 | Rnf181        |
| 0.418216394  | 1 | 0.000597  | 4 | Lpgat1        |
| -0.262022123 | 1 | 0.0006015 | 4 | Nipa2         |
| -0.877216737 | 1 | 0.0006442 | 4 | Rab3gap1      |
| 0.431880125  | 1 | 0.000647  | 4 | Txndc5        |
| -1.288690728 | 1 | 0.0006535 | 4 | Adar          |
| -0.482578865 | 1 | 0.0006573 | 4 | Sf3b4         |
| -0.33199376  | 1 | 0.0006637 | 4 | Zzef1         |
| 0.415418282  | 1 | 0.0006718 | 4 | Bbx           |
| -1.118774756 | 1 | 0.0006904 | 4 | Gpx3          |
| 0.344763524  | 1 | 0.0006972 | 4 | Ubxn6         |
| 0.31148742   | 1 | 0.000709  | 4 | Fam160b1      |
| -0.362524167 | 1 | 0.000711  | 4 | Gclc          |
| -0.56631329  | 1 | 0.0007193 | 4 | Pcbp2         |
| 0.457940705  | 1 | 0.0007199 | 4 | Abhd11        |
| 0.258784819  | 1 | 0.000723  | 4 | Eepd1         |
| 0.272537482  | 1 | 0.0007305 | 4 | Sash1         |
| 0.307941369  | 1 | 0.0007314 | 4 | Hcst          |
| 0.339697598  | 1 | 0.0007445 | 4 | Copb1         |
| 0.493192655  | 1 | 0.0007562 | 4 | Gpatch11      |
| 0.35419735   | 1 | 0.0007594 | 4 | Commdd9       |
| 0.666343288  | 1 | 0.0007624 | 4 | Kdm5b         |
| 0.37373506   | 1 | 0.0007633 | 4 | Deb1          |
| 0.469623288  | 1 | 0.0007672 | 4 | Ubtcd1        |
| -0.750478687 | 1 | 0.0007891 | 4 | Prcc2a        |
| 0.298518052  | 1 | 0.0007892 | 4 | Pik3r1        |
| -1.18420887  | 1 | 0.0007902 | 4 | Zbtb4         |
| -0.333830181 | 1 | 0.0007981 | 4 | Clta          |
| 0.391259823  | 1 | 0.0008021 | 4 | Irf5          |
| 0.71167344   | 1 | 0.0008127 | 4 | Nkg7          |
| 0.441341064  | 1 | 0.0008133 | 4 | Tmem140       |
| 0.432890274  | 1 | 0.0008197 | 4 | 2310045N01Rik |
| 1.08922311   | 1 | 0.0008441 | 4 | Gosr1         |
| -0.471893226 | 1 | 0.0008857 | 4 | Snx5          |
| -1.061590029 | 1 | 0.0008967 | 4 | Ccl2          |
| -0.709266905 | 1 | 0.0009219 | 4 | Rhob          |
| -0.295692031 | 1 | 0.0009467 | 4 | Txlina        |

|              |   |           |   |          |
|--------------|---|-----------|---|----------|
| -0.874721652 | 1 | 0.0009532 | 4 | Psmb3    |
| -0.278588688 | 1 | 0.0009559 | 4 | Slc25a46 |
| 0.388904666  | 1 | 0.0009623 | 4 | Smarcc2  |
| -0.337366399 | 1 | 0.0009835 | 4 | Psme2    |
| -1.161814174 | 1 | 0.000997  | 4 | Gbp7     |
| -0.676906408 | 1 | 0.0010088 | 4 | Kctd12   |
| -0.319086269 | 1 | 0.0010161 | 4 | Rpl37    |
| -1.288066905 | 1 | 0.0010266 | 4 | Foxj2    |
| -1.116796829 | 1 | 0.0010397 | 4 | Agps     |
| -1.00610969  | 1 | 0.0010681 | 4 | Gnb2     |
| 0.277104757  | 1 | 0.0010743 | 4 | Rhbdd1   |
| -1.209067059 | 1 | 0.0010793 | 4 | Nfxl1    |
| -1.016311651 | 1 | 0.0010851 | 4 | Egr2     |
| 0.33013533   | 1 | 0.0011191 | 4 | Il10     |
| 0.485895338  | 1 | 0.0011261 | 4 | Zfp516   |
| -0.308785941 | 1 | 0.0011288 | 4 | Dok1     |
| 0.43229632   | 1 | 0.0011386 | 4 | Mrpl36   |
| -1.067070127 | 1 | 0.0011422 | 4 | Nfu1     |
| 0.514845476  | 1 | 0.0011427 | 4 | Larp1    |
| -1.041881986 | 1 | 0.001161  | 4 | Trps1    |
| 0.768259286  | 1 | 0.0011793 | 4 | Atmin    |
| -1.147775294 | 1 | 0.0011942 | 4 | Snrpf    |
| -0.448994268 | 1 | 0.0011991 | 4 | Marcks   |
| 0.352263678  | 1 | 0.0012132 | 4 | P2ry6    |
| 0.350251596  | 1 | 0.0012141 | 4 | Vps52    |
| 0.433281667  | 1 | 0.0012262 | 4 | Anapc2   |
| 0.312836     | 1 | 0.0012481 | 4 | Kmt2b    |
| 0.257399067  | 1 | 0.0012563 | 4 | Fzr1     |
| 0.382624283  | 1 | 0.0012717 | 4 | Wdr77    |
| 0.976945869  | 1 | 0.0012917 | 4 | Smim13   |
| -0.359350818 | 1 | 0.0012924 | 4 | Etfa     |
| 0.292175745  | 1 | 0.0013284 | 4 | Myeov2   |
| -0.379641741 | 1 | 0.0013329 | 4 | Hexim1   |
| 0.261343335  | 1 | 0.0013509 | 4 | Vcpip1   |
| 0.466846984  | 1 | 0.0013515 | 4 | Bet1     |
| 0.707273569  | 1 | 0.0013628 | 4 | Ampd3    |
| -0.628579475 | 1 | 0.0013691 | 4 | Atp5h    |
| -1.186257421 | 1 | 0.001373  | 4 | Pf4      |
| 0.254942217  | 1 | 0.0013759 | 4 | Hras     |
| 0.621042891  | 1 | 0.001383  | 4 | Zmym5    |
| 0.806667793  | 1 | 0.0013859 | 4 | Taf5     |
| -0.780123878 | 1 | 0.0014066 | 4 | Sema4a   |
| -0.327082055 | 1 | 0.0014251 | 4 | Eno1b    |
| -0.270349291 | 1 | 0.0014344 | 4 | Pxdc1    |
| 0.473757035  | 1 | 0.0014492 | 4 | Pkp4     |
| 0.375721172  | 1 | 0.0014589 | 4 | Ppfibp2  |
| -1.135685628 | 1 | 0.0014909 | 4 | Birc2    |
| -0.878366268 | 1 | 0.001505  | 4 | Dtx3l    |
| -0.856574461 | 1 | 0.0015489 | 4 | Irf2bp2  |
| -0.489202564 | 1 | 0.001565  | 4 | Unc93b1  |
| -0.268382713 | 1 | 0.0016243 | 4 | Mon1a    |
| 0.285167341  | 1 | 0.0016431 | 4 | Cbfa2t3  |
| -0.405625553 | 1 | 0.0016843 | 4 | Phax     |
| -0.666080528 | 1 | 0.0017394 | 4 | Set      |
| -0.942911542 | 1 | 0.0017517 | 4 | Sh3bp1   |
| -0.2936935   | 1 | 0.0017564 | 4 | Rnf20    |
| 0.399517914  | 1 | 0.0017614 | 4 | Rad17    |
| -0.252493367 | 1 | 0.001784  | 4 | H3f3b    |
| -0.914462833 | 1 | 0.001785  | 4 | Ube2m    |
| 0.461449428  | 1 | 0.0017889 | 4 | Gps2     |
| 0.254809379  | 1 | 0.0018378 | 4 | Nt5dc2   |



|              |   |           |   |               |
|--------------|---|-----------|---|---------------|
| 0.571135664  | 1 | 0.001883  | 4 | Scnm1         |
| -1.190171564 | 1 | 0.0018855 | 4 | Fgfr1         |
| 0.979576334  | 1 | 0.0019265 | 4 | Srm           |
| 0.555792166  | 1 | 0.001931  | 4 | Appl1         |
| -0.271145611 | 1 | 0.0019335 | 4 | Ip6k1         |
| -0.459694127 | 1 | 0.0019495 | 4 | Cd74          |
| 0.298513937  | 1 | 0.0019543 | 4 | Aifm1         |
| -0.953460848 | 1 | 0.0020329 | 4 | Slc43a2       |
| -0.774029028 | 1 | 0.0020399 | 4 | Pcna          |
| -0.593811911 | 1 | 0.0020814 | 4 | Rpl36a1       |
| 0.272288788  | 1 | 0.0020904 | 4 | 5031439G07Rik |
| -1.034927598 | 1 | 0.0020915 | 4 | Ints6         |
| -0.259566722 | 1 | 0.0021027 | 4 | Spg7          |
| -1.04454382  | 1 | 0.0021121 | 4 | Osm           |
| 0.33130561   | 1 | 0.0021938 | 4 | Nomo1         |
| 0.276039604  | 1 | 0.0022372 | 4 | Vamp3         |
| -0.251675211 | 1 | 0.0023126 | 4 | Setd8         |
| -0.722769686 | 1 | 0.0023187 | 4 | Nr4a1         |
| 0.619812523  | 1 | 0.0023191 | 4 | Rsbn1         |
| -0.614989479 | 1 | 0.002366  | 4 | Ccl6          |
| 0.299304316  | 1 | 0.0023845 | 4 | Tbc1d22a      |
| 0.412821191  | 1 | 0.0023917 | 4 | Lrwd1         |
| -0.308834314 | 1 | 0.0024666 | 4 | Calr          |
| -0.305288062 | 1 | 0.0024797 | 4 | Fut8          |
| -0.581004564 | 1 | 0.00255   | 4 | Slc29a1       |
| 0.418851131  | 1 | 0.0025645 | 4 | 1500011K16Rik |
| 0.539579297  | 1 | 0.0026162 | 4 | Herc1         |
| -1.099957104 | 1 | 0.0026427 | 4 | Arl8a         |
| 0.886172066  | 1 | 0.0026707 | 4 | Pou2f1        |
| -1.23744894  | 1 | 0.0026708 | 4 | Wdfy4         |
| -1.166338374 | 1 | 0.0026867 | 4 | Pmaip1        |
| -1.154237352 | 1 | 0.0027153 | 4 | 4833420G17Rik |
| 0.348341917  | 1 | 0.002773  | 4 | Slc25a44      |
| 0.39794316   | 1 | 0.0027819 | 4 | Crip2         |
| 0.304615377  | 1 | 0.0028339 | 4 | Pop7          |
| -0.924784109 | 1 | 0.0028533 | 4 | Dnajc19       |
| -0.784274666 | 1 | 0.0028811 | 4 | Dusp6         |
| -0.313742478 | 1 | 0.0028836 | 4 | 5730416F02Rik |
| 0.255600064  | 1 | 0.0030602 | 4 | Poglut1       |
| -0.296483863 | 1 | 0.0031915 | 4 | Msl1          |
| 0.431393555  | 1 | 0.0032134 | 4 | Def6          |
| -0.348962193 | 1 | 0.003295  | 4 | Jade2         |
| 0.348916145  | 1 | 0.0033348 | 4 | Tcerg1        |
| -1.084584976 | 1 | 0.0033563 | 4 | Naaa          |
| -0.331895227 | 1 | 0.0033804 | 4 | Al837181      |
| -0.561885417 | 1 | 0.0034199 | 4 | Psenen        |
| -1.046716146 | 1 | 0.0034342 | 4 | Tfe3          |
| 0.416909031  | 1 | 0.0034468 | 4 | Ptdss1        |
| -1.141567766 | 1 | 0.0034493 | 4 | Srgap2        |
| 0.637652151  | 1 | 0.0034514 | 4 | Upf3a         |
| -1.241928405 | 1 | 0.0035262 | 4 | Irf7          |
| 0.253517484  | 1 | 0.0035382 | 4 | Dhx8          |
| -0.289567381 | 1 | 0.0035505 | 4 | Tmsb10        |
| 0.259520905  | 1 | 0.0035959 | 4 | Kif3a         |
| 0.370748014  | 1 | 0.0036125 | 4 | Tmem192       |
| -0.253100868 | 1 | 0.0036561 | 4 | Pabpc1        |
| -0.737655886 | 1 | 0.0036957 | 4 | Chmp1a        |
| 0.448392853  | 1 | 0.0037016 | 4 | Gpcpd1        |
| -0.933131444 | 1 | 0.003725  | 4 | Wipf2         |
| 0.316714463  | 1 | 0.0038339 | 4 | Gm12942       |
| -0.291010695 | 1 | 0.0038371 | 4 | 5430427O19Rik |

|              |   |           |   |               |
|--------------|---|-----------|---|---------------|
| 0.49185678   | 1 | 0.0038693 | 4 | Impad1        |
| -0.250065209 | 1 | 0.0039469 | 4 | Rnf44         |
| 0.558186195  | 1 | 0.0039562 | 4 | Sik1          |
| -0.497190313 | 1 | 0.0040369 | 4 | Eps15l1       |
| -0.399049119 | 1 | 0.0040512 | 4 | Adap2         |
| -1.0054896   | 1 | 0.0040619 | 4 | Mfge8         |
| -0.267807127 | 1 | 0.0040759 | 4 | Fam219b       |
| -0.25079655  | 1 | 0.0041631 | 4 | 1500012F01Rik |
| -0.556803454 | 1 | 0.0042589 | 4 | Midn          |
| 0.562367558  | 1 | 0.0043052 | 4 | Plod3         |
| -1.270607408 | 1 | 0.0043236 | 4 | Clec10a       |
| -0.297943588 | 1 | 0.004351  | 4 | Osgin2        |
| -0.77826693  | 1 | 0.004365  | 4 | Clec4n        |
| -0.565664549 | 1 | 0.0045085 | 4 | Csde1         |
| -0.306681014 | 1 | 0.0045174 | 4 | Med21         |
| 1.054017489  | 1 | 0.0045445 | 4 | Rpp25l        |
| -0.302391028 | 1 | 0.0045833 | 4 | Atxn1l        |
| -0.332537313 | 1 | 0.0046426 | 4 | Umps          |
| 0.896624728  | 1 | 0.0046779 | 4 | Zc3h4         |
| 1.146465314  | 1 | 0.0047224 | 4 | Lsg1          |
| -0.439520007 | 1 | 0.0047847 | 4 | Rbm39         |
| 0.307566104  | 1 | 0.0047848 | 4 | Ext2          |
| -0.290334323 | 1 | 0.0047848 | 4 | D17Wsu92e     |
| 0.861695167  | 1 | 0.0048269 | 4 | Mcoln2        |
| -0.620610634 | 1 | 0.0048419 | 4 | Fli1          |
| 0.301118032  | 1 | 0.0049073 | 4 | Map3k2        |
| -0.899889586 | 1 | 0.0049245 | 4 | Cmpk1         |
| -0.587868847 | 1 | 0.0049567 | 4 | Nufip2        |
| -0.728380111 | 1 | 0.0052294 | 4 | Hnrnpa1       |
| -1.095543233 | 1 | 0.0052527 | 4 | Zfhx3         |
| -1.020963854 | 1 | 0.0053362 | 4 | Ralgapa1      |
| -0.266331769 | 1 | 0.0054254 | 4 | Ptpro         |
| -0.425114006 | 1 | 0.0055382 | 4 | Cd40          |
| -0.789349304 | 1 | 0.0057857 | 4 | Sh3gl1        |
| 0.473416663  | 1 | 0.0059344 | 4 | Sap18         |
| -0.550701292 | 1 | 0.0059625 | 4 | Snrpd2        |
| -1.127663926 | 1 | 0.0059799 | 4 | Arpc1a        |
| -0.882706132 | 1 | 0.0059934 | 4 | Psma5         |
| -0.964766305 | 1 | 0.0060581 | 4 | Cysltr1       |
| -0.645470107 | 1 | 0.0061062 | 4 | Purb          |
| 0.37796905   | 1 | 0.0062182 | 4 | Nfam1         |
| 0.366857518  | 1 | 0.0062827 | 4 | Ddx6          |
| -0.9225254   | 1 | 0.0063776 | 4 | Fn1           |
| -1.041059905 | 1 | 0.0064045 | 4 | Ino80d        |
| 0.472849366  | 1 | 0.0064103 | 4 | Lin7c         |
| -1.202014551 | 1 | 0.0064203 | 4 | Olfm1         |
| -0.957953278 | 1 | 0.0065836 | 4 | C3            |
| 0.433303007  | 1 | 0.0066141 | 4 | Eno3          |
| 0.47251014   | 1 | 0.0066361 | 4 | Naca          |
| -0.956355919 | 1 | 0.0066688 | 4 | Vmp1          |
| -0.897189763 | 1 | 0.0066893 | 4 | Fyttd1        |
| -0.991231841 | 1 | 0.006714  | 4 | Tm9sf1        |
| -0.272748016 | 1 | 0.0067581 | 4 | Psd4          |
| 0.546227647  | 1 | 0.0067946 | 4 | Dnlz          |
| -0.506430767 | 1 | 0.0068216 | 4 | Slc25a5       |
| -0.77901014  | 1 | 0.0068802 | 4 | 1810022K09Rik |
| 0.276542555  | 1 | 0.0068912 | 4 | Rnf139        |
| -0.803040511 | 1 | 0.0069102 | 4 | Rab5c         |
| -0.650764111 | 1 | 0.0070434 | 4 | Tma7          |
| -0.811134485 | 1 | 0.007122  | 4 | Synrg         |
| 0.575561477  | 1 | 0.007412  | 4 | Arap2         |

|                     |                 |                 |          |               |
|---------------------|-----------------|-----------------|----------|---------------|
| -0.396745991        | 1               | 0.0075038       | 4        | App           |
| -1.031789818        | 1               | 0.0075504       | 4        | Mrpl3         |
| 0.253824059         | 1               | 0.0075878       | 4        | lqgap1        |
| -1.102063353        | 1               | 0.0076823       | 4        | Ang           |
| -0.917540206        | 1               | 0.0077152       | 4        | Taf4a         |
| -1.033430425        | 1               | 0.007729        | 4        | 4932438A13Rik |
| -1.087273565        | 1               | 0.007854        | 4        | Cited2        |
| -0.320810252        | 1               | 0.0078673       | 4        | Soga1         |
| -0.400926245        | 1               | 0.0079333       | 4        | Cd53          |
| -0.294743395        | 1               | 0.0079514       | 4        | Mtmr4         |
| -0.354139514        | 1               | 0.0079557       | 4        | Dusp1         |
| 0.413572563         | 1               | 0.0080131       | 4        | Ap1g2         |
| -0.863342394        | 1               | 0.0081339       | 4        | Tmem165       |
| 0.27971767          | 1               | 0.0082101       | 4        | Jade1         |
| -0.274969237        | 1               | 0.0082756       | 4        | C1qa          |
| -0.300172029        | 1               | 0.0084849       | 4        | Creb5         |
| -0.379317238        | 1               | 0.0085546       | 4        | Kansl1        |
| -1.014371074        | 1               | 0.0085792       | 4        | Tns1          |
| -0.299316734        | 1               | 0.0090399       | 4        | Nans          |
| -0.685745825        | 1               | 0.0092465       | 4        | Plxnd1        |
| -1.234640081        | 1               | 0.009248        | 4        | Oasl1         |
| 0.526273368         | 1               | 0.0094072       | 4        | Elk3          |
| 0.317152179         | 1               | 0.0094677       | 4        | Pcnt          |
| 0.378750083         | 1               | 0.0095408       | 4        | Usp45         |
| 0.532087283         | 1               | 0.009588        | 4        | Prelid1       |
| -1.016755091        | 1               | 0.0095924       | 4        | Rbm47         |
| -0.255351177        | 1               | 0.0099675       | 4        | Pbx3          |
| -1.795984227        | 1.25E-32        | 9.39E-37        | 5        | C1qc          |
| -1.422824816        | 1.28E-32        | 9.62E-37        | 5        | C1qb          |
| -1.838456837        | 1.02E-29        | 7.64E-34        | 5        | C1qa          |
| 0.971909889         | 8.84E-26        | 6.62E-30        | 5        | Tmsb10        |
| -1.976061496        | 1.43E-25        | 1.07E-29        | 5        | C3ar1         |
| -1.808998682        | 9.41E-24        | 7.05E-28        | 5        | Ms4a7         |
| -1.123672056        | 3.82E-23        | 2.86E-27        | 5        | Lyz2          |
| -1.741611547        | 5.48E-23        | 4.11E-27        | 5        | Timp2         |
| 0.827199065         | 5.94E-22        | 4.45E-26        | 5        | H2-Aa         |
| 1.57816466          | 1.04E-21        | 7.81E-26        | 5        | H2-DMb2       |
| -1.579720167        | 1.11E-21        | 8.35E-26        | 5        | Sepp1         |
| -1.827149374        | 2.27E-21        | 1.70E-25        | 5        | Emr1          |
| 0.807122734         | 2.67E-21        | 2.00E-25        | 5        | H2-Ab1        |
| -0.734394316        | 1.06E-20        | 7.95E-25        | 5        | Ctsb          |
| -1.462752027        | 2.86E-20        | 2.14E-24        | 5        | Fcgr3         |
| 0.833147018         | 4.03E-20        | 3.02E-24        | 5        | H2-Eb1        |
| 0.771421076         | 7.27E-19        | 5.44E-23        | 5        | Cd74          |
| -1.704787192        | 7.38E-19        | 5.53E-23        | 5        | Mafb          |
| 1.725883157         | 2.77E-18        | 2.07E-22        | 5        | Spint2        |
| -2.062918699        | 5.02E-18        | 3.76E-22        | 5        | Igf1          |
| <b>-1.182506725</b> | <b>5.13E-18</b> | <b>3.84E-22</b> | <b>5</b> | <b>Csf1r</b>  |
| 1.804269389         | 2.31E-17        | 1.73E-21        | 5        | P2ry10        |
| 0.973711306         | 3.31E-17        | 2.48E-21        | 5        | Rps19         |
| 1.435494185         | 3.45E-17        | 2.58E-21        | 5        | Cytip         |
| -1.643653273        | 1.38E-16        | 1.03E-20        | 5        | Trem2         |
| -1.402321552        | 3.08E-16        | 2.31E-20        | 5        | Abca1         |
| 0.821004019         | 6.00E-16        | 4.49E-20        | 5        | Lsp1          |
| -1.939223106        | 1.85E-15        | 1.39E-19        | 5        | Cd84          |
| 0.928317584         | 6.19E-15        | 4.64E-19        | 5        | Sub1          |
| -1.153956199        | 2.10E-14        | 1.57E-18        | 5        | Dhrs3         |
| -1.533146392        | 2.21E-14        | 1.65E-18        | 5        | Ccl3          |
| -0.91347448         | 4.49E-14        | 3.36E-18        | 5        | Ctsd          |
| 0.52306473          | 5.21E-14        | 3.90E-18        | 5        | Rpl41         |
| 2.013846527         | 1.29E-13        | 9.69E-18        | 5        | H2-Eb2        |

|              |          |          |   |               |
|--------------|----------|----------|---|---------------|
| -1.154514027 | 1.33E-13 | 9.96E-18 | 5 | Cxcl2         |
| -2.076124534 | 1.84E-13 | 1.38E-17 | 5 | Serpinb6a     |
| -1.764557565 | 2.63E-13 | 1.97E-17 | 5 | C5ar1         |
| 0.577018035  | 3.06E-13 | 2.29E-17 | 5 | Rps9          |
| -1.150465938 | 4.64E-13 | 3.48E-17 | 5 | Nrp1          |
| -1.372497901 | 5.07E-13 | 3.80E-17 | 5 | Stab1         |
| 0.478634936  | 5.21E-13 | 3.90E-17 | 5 | Ifitm7        |
| -0.751168878 | 6.56E-13 | 4.91E-17 | 5 | Grn           |
| 0.466216388  | 8.60E-13 | 6.44E-17 | 5 | Tmsb4x        |
| -1.342529476 | 9.31E-13 | 6.97E-17 | 5 | Tnf           |
| 1.774598393  | 1.07E-12 | 8.04E-17 | 5 | Flt3          |
| 1.039999294  | 1.35E-12 | 1.01E-16 | 5 | S100a11       |
| -1.524741088 | 2.51E-12 | 1.88E-16 | 5 | Tmem106a      |
| -1.260676748 | 2.82E-12 | 2.11E-16 | 5 | Rhob          |
| -1.999727406 | 3.89E-12 | 2.91E-16 | 5 | Pmp22         |
| -0.993886513 | 7.61E-12 | 5.70E-16 | 5 | Pltp          |
| -1.441985794 | 7.69E-12 | 5.76E-16 | 5 | Tgfbr2        |
| -0.910432694 | 9.62E-12 | 7.21E-16 | 5 | Fyb           |
| -0.802729875 | 1.36E-11 | 1.02E-15 | 5 | Cd63          |
| -1.325200727 | 1.47E-11 | 1.10E-15 | 5 | Glul          |
| -1.07387063  | 2.95E-11 | 2.21E-15 | 5 | 5430435G22Rik |
| -1.521493596 | 3.44E-11 | 2.58E-15 | 5 | Ecm1          |
| -1.2240538   | 3.67E-11 | 2.75E-15 | 5 | Zeb2          |
| -1.844860094 | 3.85E-11 | 2.88E-15 | 5 | Itgb5         |
| -1.342082057 | 4.80E-11 | 3.60E-15 | 5 | Cd81          |
| -1.446035643 | 8.68E-11 | 6.50E-15 | 5 | Pla2g7        |
| -0.695782887 | 1.85E-10 | 1.38E-14 | 5 | Lamp1         |
| 0.49856138   | 2.60E-10 | 1.94E-14 | 5 | Rplp0         |
| -1.554620261 | 3.33E-10 | 2.49E-14 | 5 | Cd93          |
| -1.87147633  | 3.65E-10 | 2.73E-14 | 5 | Pf4           |
| 0.809714791  | 4.49E-10 | 3.36E-14 | 5 | Rpl18         |
| -1.198067507 | 6.21E-10 | 4.65E-14 | 5 | 4632428N05Rik |
| 0.416443636  | 6.25E-10 | 4.68E-14 | 5 | Rps14         |
| 1.009407112  | 8.60E-10 | 6.44E-14 | 5 | Syngt2        |
| -1.613452404 | 8.72E-10 | 6.53E-14 | 5 | Slc11a1       |
| -1.042045742 | 8.90E-10 | 6.66E-14 | 5 | Lipa          |
| -2.294686022 | 9.80E-10 | 7.34E-14 | 5 | Folr2         |
| 0.608014948  | 1.03E-09 | 7.70E-14 | 5 | Cd52          |
| 2.055183219  | 1.03E-09 | 7.72E-14 | 5 | Btla          |
| 0.90551      | 1.16E-09 | 8.72E-14 | 5 | Psme2         |
| -0.758982773 | 1.22E-09 | 9.11E-14 | 5 | Cd14          |
| 0.435254695  | 1.69E-09 | 1.27E-13 | 5 | Mir682        |
| 0.607765996  | 1.74E-09 | 1.30E-13 | 5 | Gm6654        |
| 0.501024835  | 2.24E-09 | 1.67E-13 | 5 | Rps15         |
| -1.636417548 | 2.44E-09 | 1.83E-13 | 5 | Fcrls         |
| -1.879491716 | 3.08E-09 | 2.31E-13 | 5 | Rnase4        |
| 1.457052147  | 3.50E-09 | 2.62E-13 | 5 | Jak2          |
| -1.479230516 | 3.60E-09 | 2.70E-13 | 5 | Nfic          |
| 0.562450764  | 3.61E-09 | 2.70E-13 | 5 | Rpl14         |
| 0.694021179  | 3.81E-09 | 2.85E-13 | 5 | Rpl6          |
| -1.122542498 | 5.10E-09 | 3.82E-13 | 5 | Ehd4          |
| 0.648383612  | 9.23E-09 | 6.92E-13 | 5 | Rpl18a        |
| 0.556877361  | 1.48E-08 | 1.11E-12 | 5 | Rpl14-ps1     |
| 0.612258173  | 1.56E-08 | 1.17E-12 | 5 | Rps18         |
| -1.272328069 | 1.73E-08 | 1.29E-12 | 5 | Blvrb         |
| 0.498634385  | 2.28E-08 | 1.71E-12 | 5 | Rps20         |
| -0.887384361 | 2.35E-08 | 1.76E-12 | 5 | Al607873      |
| -1.086415171 | 2.45E-08 | 1.83E-12 | 5 | Camk1         |
| -1.354541877 | 3.19E-08 | 2.39E-12 | 5 | Acp2          |
| -1.400747874 | 3.51E-08 | 2.63E-12 | 5 | Mrc1          |
| -0.977763724 | 3.56E-08 | 2.67E-12 | 5 | Ninj1         |

|              |          |          |   |           |
|--------------|----------|----------|---|-----------|
| 0.451508075  | 4.64E-08 | 3.48E-12 | 5 | Gm1821    |
| 0.495599461  | 4.67E-08 | 3.50E-12 | 5 | Rps3a1    |
| -0.835097223 | 4.78E-08 | 3.58E-12 | 5 | Metrn1    |
| 0.478805732  | 4.96E-08 | 3.72E-12 | 5 | Rps4x     |
| 0.720209633  | 5.05E-08 | 3.78E-12 | 5 | Gas5      |
| 0.925821167  | 5.17E-08 | 3.87E-12 | 5 | Rpl35a    |
| 0.298424434  | 5.56E-08 | 4.17E-12 | 5 | Rps19-ps3 |
| -1.862787323 | 5.86E-08 | 4.39E-12 | 5 | Ccl7      |
| 0.550719148  | 7.34E-08 | 5.50E-12 | 5 | Rps2      |
| -1.018358687 | 7.95E-08 | 5.96E-12 | 5 | Tgfbr1    |
| -0.904135416 | 9.44E-08 | 7.07E-12 | 5 | Ccl4      |
| 0.44157582   | 9.91E-08 | 7.43E-12 | 5 | Rps26     |
| 0.723468671  | 1.00E-07 | 7.49E-12 | 5 | Rpl39     |
| -1.993873548 | 1.07E-07 | 8.00E-12 | 5 | Cbr2      |
| -1.523972919 | 1.08E-07 | 8.06E-12 | 5 | Ccl2      |
| -1.301588811 | 1.50E-07 | 1.12E-11 | 5 | Ctsl      |
| -1.510190327 | 1.59E-07 | 1.19E-11 | 5 | Msr1      |
| -1.898646311 | 1.70E-07 | 1.27E-11 | 5 | Cpd       |
| 0.304788438  | 2.22E-07 | 1.67E-11 | 5 | Actb      |
| 1.487964252  | 2.24E-07 | 1.68E-11 | 5 | Il1r2     |
| 0.451471654  | 2.41E-07 | 1.81E-11 | 5 | Rplp2     |
| -1.526996403 | 2.51E-07 | 1.88E-11 | 5 | Plau      |
| -0.794702856 | 3.09E-07 | 2.31E-11 | 5 | Ctsc      |
| -1.859634738 | 3.20E-07 | 2.40E-11 | 5 | Rab31     |
| 0.43332952   | 3.37E-07 | 2.52E-11 | 5 | Rpl8      |
| -1.965237745 | 3.62E-07 | 2.71E-11 | 5 | Tspan4    |
| -1.629320082 | 3.71E-07 | 2.78E-11 | 5 | Tmem37    |
| 0.739074946  | 3.83E-07 | 2.87E-11 | 5 | Rpsa      |
| -0.766523333 | 4.65E-07 | 3.48E-11 | 5 | Mpeg1     |
| 1.652037356  | 5.75E-07 | 4.31E-11 | 5 | H2-Ob     |
| 1.777929109  | 6.23E-07 | 4.67E-11 | 5 | Klrd1     |
| -0.872365972 | 6.84E-07 | 5.12E-11 | 5 | Trf       |
| -1.605843338 | 7.12E-07 | 5.33E-11 | 5 | Gas7      |
| 1.49726315   | 7.39E-07 | 5.54E-11 | 5 | Samsn1    |
| 1.317755884  | 7.83E-07 | 5.86E-11 | 5 | Itgb7     |
| -0.826716066 | 8.08E-07 | 6.05E-11 | 5 | Plin2     |
| 0.514796877  | 8.32E-07 | 6.23E-11 | 5 | Rps11     |
| -1.248229665 | 8.54E-07 | 6.40E-11 | 5 | Itpr1p2   |
| -1.93813626  | 9.01E-07 | 6.75E-11 | 5 | Wwp1      |
| 0.564936961  | 9.10E-07 | 6.82E-11 | 5 | Gm6251    |
| -0.502329265 | 1.04E-06 | 7.80E-11 | 5 | Itm2b     |
| -0.71355356  | 1.09E-06 | 8.16E-11 | 5 | Ets2      |
| -1.241760316 | 1.18E-06 | 8.87E-11 | 5 | Hpgds     |
| 2.553557516  | 1.25E-06 | 9.40E-11 | 5 | Ccr7      |
| 0.636538802  | 1.30E-06 | 9.72E-11 | 5 | Btg1      |
| 1.945741254  | 1.45E-06 | 1.09E-10 | 5 | Glipr2    |
| 0.392429029  | 1.46E-06 | 1.09E-10 | 5 | Rpl32     |
| -0.639688697 | 1.53E-06 | 1.15E-10 | 5 | Lamp2     |
| 0.676155249  | 1.54E-06 | 1.15E-10 | 5 | Rps7      |
| -0.668836926 | 1.65E-06 | 1.24E-10 | 5 | Tpp1      |
| -1.134294674 | 1.86E-06 | 1.40E-10 | 5 | S100a1    |
| -1.715540419 | 1.93E-06 | 1.44E-10 | 5 | Tmem9b    |
| 1.014624139  | 2.29E-06 | 1.72E-10 | 5 | Gpr132    |
| 0.477837897  | 2.33E-06 | 1.75E-10 | 5 | Srgn      |
| 0.619546436  | 2.50E-06 | 1.87E-10 | 5 | Rpl13a    |
| -1.333755987 | 2.68E-06 | 2.01E-10 | 5 | Nceh1     |
| -1.287538304 | 2.74E-06 | 2.05E-10 | 5 | Cln8      |
| -1.329700784 | 3.04E-06 | 2.28E-10 | 5 | Egr1      |
| 1.46628834   | 3.11E-06 | 2.33E-10 | 5 | Dpp4      |
| -0.702300427 | 3.37E-06 | 2.53E-10 | 5 | Aif1      |
| -1.081147734 | 3.41E-06 | 2.55E-10 | 5 | Rab3il1   |

|              |             |          |   |               |
|--------------|-------------|----------|---|---------------|
| 0.370433928  | 3.55E-06    | 2.66E-10 | 5 | Calm1         |
| -1.171308465 | 4.01E-06    | 3.00E-10 | 5 | Cebpa         |
| 0.522648899  | 4.29E-06    | 3.21E-10 | 5 | Coro1a        |
| 0.463708247  | 4.92E-06    | 3.68E-10 | 5 | Pfn1          |
| 0.332302362  | 6.30E-06    | 4.72E-10 | 5 | Eef1a1        |
| -1.174659577 | 6.56E-06    | 4.91E-10 | 5 | P2ry6         |
| -0.586080615 | 6.74E-06    | 5.05E-10 | 5 | Hexa          |
| 0.33750737   | 7.09E-06    | 5.31E-10 | 5 | Rps24         |
| -1.018406098 | 8.01E-06    | 6.00E-10 | 5 | Blnk          |
| -1.466304562 | 8.29E-06    | 6.21E-10 | 5 | Lpl           |
| -0.749368761 | 8.75E-06    | 6.55E-10 | 5 | Ccl6          |
| -1.228998228 | 9.34E-06    | 6.99E-10 | 5 | Zfhx3         |
| 1.265833176  | 9.37E-06    | 7.02E-10 | 5 | Strbp         |
| -0.710989091 | 1.02E-05    | 7.62E-10 | 5 | Mtss1         |
| -0.741206104 | 1.02E-05    | 7.65E-10 | 5 | Abhd12        |
| -0.669434429 | 1.10E-05    | 8.26E-10 | 5 | Cyfp1         |
| -0.777174061 | 1.25E-05    | 9.40E-10 | 5 | Ms4a6d        |
| -1.069624418 | 1.28E-05    | 9.57E-10 | 5 | Gdf15         |
| -1.288283191 | 1.33E-05    | 9.94E-10 | 5 | Tanc2         |
| 0.710341327  | 1.36E-05    | 1.02E-09 | 5 | Rps15a-ps6    |
| -0.969862783 | 1.58E-05    | 1.19E-09 | 5 | Cd302         |
| -1.023357735 | 1.62E-05    | 1.22E-09 | 5 | Nucb1         |
| -0.654466974 | 1.64E-05    | 1.23E-09 | 5 | Cndp2         |
| 0.500752431  | 1.77E-05    | 1.32E-09 | 5 | Shfm1         |
| -0.605402649 | 1.95E-05    | 1.46E-09 | 5 | Psap          |
| -0.762864713 | 2.47E-05    | 1.85E-09 | 5 | Apobec1       |
| -1.237656941 | 2.52E-05    | 1.89E-09 | 5 | Fcgr1         |
| -1.219673387 | 2.86E-05    | 2.14E-09 | 5 | Sash1         |
| 0.368081462  | 3.05E-05    | 2.28E-09 | 5 | Gm11517       |
| -0.733957731 | 3.31E-05    | 2.48E-09 | 5 | Atp6v1a       |
| 0.586405912  | 3.33E-05    | 2.49E-09 | 5 | Mir703        |
| 2.111862338  | 3.37E-05    | 2.53E-09 | 5 | Tbc1d4        |
| -0.499823151 | 3.45E-05    | 2.58E-09 | 5 | Ctsa          |
| 0.389818933  | 3.60E-05    | 2.69E-09 | 5 | Rps5          |
| -0.917623863 | 3.93E-05    | 2.95E-09 | 5 | Rhoc          |
| -0.920732523 | 4.07E-05    | 3.05E-09 | 5 | Gusb          |
| 0.433433204  | 4.12E-05    | 3.08E-09 | 5 | Gnb2l1        |
| -0.560295296 | 4.47E-05    | 3.35E-09 | 5 | Serinc3       |
| -0.868172405 | 4.50E-05    | 3.37E-09 | 5 | Snx6          |
| 1.218084353  | 4.87E-05    | 3.64E-09 | 5 | Rab11fip1     |
| -1.035875959 | 4.90E-05    | 3.67E-09 | 5 | Pon2          |
| 1.908672006  | 4.90E-05    | 3.67E-09 | 5 | Tmem39a       |
| 0.501539309  | 4.93E-05    | 3.69E-09 | 5 | Atox1         |
| -0.885197013 | 5.09E-05    | 3.81E-09 | 5 | Sec14l1       |
| -1.88228843  | 5.18E-05    | 3.88E-09 | 5 | Rgl1          |
| -0.853313158 | 5.90E-05    | 4.42E-09 | 5 | Lat2          |
| -0.989229882 | 6.24E-05    | 4.67E-09 | 5 | Lair1         |
| -1.059569346 | 6.32E-05    | 4.74E-09 | 5 | 2610507B11Rik |
| 0.723127949  | 6.32E-05    | 4.74E-09 | 5 | Bcl2a1d       |
| -0.937296297 | 6.64E-05    | 4.98E-09 | 5 | Cd300ld       |
| -0.594842593 | 7.00E-05    | 5.24E-09 | 5 | Capg          |
| -0.912072924 | 7.77E-05    | 5.82E-09 | 5 | Il10rb        |
| -0.836647686 | 7.78E-05    | 5.82E-09 | 5 | Creg1         |
| -0.69683324  | 7.78E-05    | 5.82E-09 | 5 | Sirpa         |
| -1.716477862 | 8.51E-05    | 6.37E-09 | 5 | F13a1         |
| 0.319303953  | 9.75E-05    | 7.30E-09 | 5 | Rpl13         |
| 0.545338943  | 0.000102499 | 7.68E-09 | 5 | Rpl22         |
| -0.460032485 | 0.000103499 | 7.75E-09 | 5 | Cybb          |
| -0.651739007 | 0.000108097 | 8.10E-09 | 5 | Pea15a        |
| -1.073449316 | 0.000121528 | 9.10E-09 | 5 | Pld3          |
| 0.555439427  | 0.00013043  | 9.77E-09 | 5 | Rpl37a        |

|              |             |          |   |               |
|--------------|-------------|----------|---|---------------|
| -0.45277911  | 0.000133198 | 9.98E-09 | 5 | Nfkbiz        |
| -0.523110357 | 0.000161836 | 1.21E-08 | 5 | Lrp1          |
| -0.687090312 | 0.000164816 | 1.23E-08 | 5 | Clec12a       |
| -0.692695646 | 0.000175794 | 1.32E-08 | 5 | Mfsd1         |
| 0.654772621  | 0.000187314 | 1.40E-08 | 5 | Rpl29         |
| 0.336924133  | 0.000196769 | 1.47E-08 | 5 | Cox4i1        |
| -1.404321783 | 0.000198599 | 1.49E-08 | 5 | Dst           |
| -0.56540014  | 0.000220265 | 1.65E-08 | 5 | Atp6ap1       |
| 0.33516284   | 0.000221598 | 1.66E-08 | 5 | Pabpc1        |
| 0.706557813  | 0.000222667 | 1.67E-08 | 5 | S100a4        |
| -0.605354102 | 0.000256815 | 1.92E-08 | 5 | Tmem50a       |
| -0.422953052 | 0.000257371 | 1.93E-08 | 5 | Gns           |
| -0.445446349 | 0.000257637 | 1.93E-08 | 5 | Anxa5         |
| -1.121274667 | 0.000265739 | 1.99E-08 | 5 | Mpp1          |
| -0.727937241 | 0.000272657 | 2.04E-08 | 5 | Rab11fip5     |
| 0.822378354  | 0.000275789 | 2.07E-08 | 5 | H2afz         |
| 1.765259496  | 0.000289052 | 2.16E-08 | 5 | 4930523C07Rik |
| 0.914356604  | 0.000309401 | 2.32E-08 | 5 | Rpl36a1       |
| 0.481443804  | 0.00031561  | 2.36E-08 | 5 | Rps8          |
| -1.508665721 | 0.000321839 | 2.41E-08 | 5 | Cfh           |
| 0.807311783  | 0.000341409 | 2.56E-08 | 5 | Bhlhe40       |
| 1.298781326  | 0.000361183 | 2.71E-08 | 5 | Plscr1        |
| -0.636004278 | 0.000365504 | 2.74E-08 | 5 | Tlr2          |
| 1.252893194  | 0.000397238 | 2.98E-08 | 5 | Klrb1b        |
| -0.479061663 | 0.000404319 | 3.03E-08 | 5 | Cd68          |
| -0.545859252 | 0.000412682 | 3.09E-08 | 5 | Atp6v0a1      |
| 0.258494576  | 0.000456294 | 3.42E-08 | 5 | Gm4832        |
| -0.721560282 | 0.000456761 | 3.42E-08 | 5 | Ier3          |
| -1.370799852 | 0.000498815 | 3.74E-08 | 5 | Slc37a2       |
| -1.406079414 | 0.000536242 | 4.02E-08 | 5 | Rin2          |
| -1.461061192 | 0.000554433 | 4.15E-08 | 5 | Gstm1         |
| -1.433475564 | 0.000555173 | 4.16E-08 | 5 | Cxcl10        |
| -0.487594805 | 0.000594928 | 4.46E-08 | 5 | Akr1a1        |
| -0.475132176 | 0.000597659 | 4.48E-08 | 5 | Lgals1        |
| 0.769567723  | 0.000649697 | 4.87E-08 | 5 | Rps16         |
| -1.054962825 | 0.000663698 | 4.97E-08 | 5 | Cd36          |
| -0.999149518 | 0.000711983 | 5.33E-08 | 5 | Cx3cr1        |
| -1.085612313 | 0.000731139 | 5.48E-08 | 5 | Rassf4        |
| -0.699131466 | 0.000747065 | 5.60E-08 | 5 | Tmem66        |
| -1.272016505 | 0.000765064 | 5.73E-08 | 5 | Rcan1         |
| 1.420378744  | 0.00077527  | 5.81E-08 | 5 | Ramp3         |
| -0.503103423 | 0.000803941 | 6.02E-08 | 5 | Lgals3bp      |
| -0.639510792 | 0.000864426 | 6.47E-08 | 5 | Slamf9        |
| 1.443342703  | 0.000869342 | 6.51E-08 | 5 | Ifitm1        |
| -0.516911256 | 0.000870708 | 6.52E-08 | 5 | Myof          |
| 0.707910291  | 0.000897857 | 6.72E-08 | 5 | Ifi30         |
| -0.652901685 | 0.000902439 | 6.76E-08 | 5 | Hexb          |
| -0.666375135 | 0.000912357 | 6.83E-08 | 5 | Lmna          |
| -1.667199593 | 0.000982944 | 7.36E-08 | 5 | Ccl12         |
| -1.254543794 | 0.001099773 | 8.24E-08 | 5 | Cxcl1         |
| -0.881215943 | 0.001165764 | 8.73E-08 | 5 | Dstn          |
| 0.326098049  | 0.001211809 | 9.08E-08 | 5 | Gm13826       |
| -0.682253668 | 0.001243438 | 9.31E-08 | 5 | Lgals9        |
| -0.562444862 | 0.00132278  | 9.91E-08 | 5 | Dab2          |
| 0.608865808  | 0.001446784 | 1.08E-07 | 5 | Gm2a          |
| -0.634063998 | 0.001467656 | 1.10E-07 | 5 | Ppt1          |
| -1.092401491 | 0.001480099 | 1.11E-07 | 5 | P2rx4         |
| -1.131705274 | 0.001485094 | 1.11E-07 | 5 | Tlr7          |
| -0.462859568 | 0.001761934 | 1.32E-07 | 5 | Cyth4         |
| -1.38673635  | 0.001838888 | 1.38E-07 | 5 | Asph          |
| 0.391414559  | 0.001874566 | 1.40E-07 | 5 | H2-K1         |

|              |             |          |   |               |
|--------------|-------------|----------|---|---------------|
| -0.79878316  | 0.001947175 | 1.46E-07 | 5 | Arap1         |
| 0.747573611  | 0.002065705 | 1.55E-07 | 5 | Myl6          |
| -1.449330603 | 0.002130842 | 1.60E-07 | 5 | Gas6          |
| -1.56553336  | 0.002138569 | 1.60E-07 | 5 | Alas1         |
| 1.615689657  | 0.002241143 | 1.68E-07 | 5 | Avpi1         |
| 1.517147604  | 0.002255868 | 1.69E-07 | 5 | H2-Oa         |
| -0.654325407 | 0.002280228 | 1.71E-07 | 5 | Usp8          |
| -0.642594956 | 0.002409923 | 1.80E-07 | 5 | Ptplad2       |
| -0.746766044 | 0.00256426  | 1.92E-07 | 5 | Ptpre         |
| -1.070555474 | 0.002732535 | 2.05E-07 | 5 | Ifi27         |
| -1.471863135 | 0.002988568 | 2.24E-07 | 5 | Apbb2         |
| 0.300242623  | 0.003117674 | 2.33E-07 | 5 | Rplp1         |
| -0.387117484 | 0.003122832 | 2.34E-07 | 5 | Unc93b1       |
| -0.615916625 | 0.003338852 | 2.50E-07 | 5 | 2010111I01Rik |
| 2.273794048  | 0.003349539 | 2.51E-07 | 5 | Ccl22         |
| -0.664775307 | 0.003355948 | 2.51E-07 | 5 | Hspa1a        |
| 0.788685687  | 0.003358875 | 2.52E-07 | 5 | H2-DMa        |
| -1.116050077 | 0.003477992 | 2.60E-07 | 5 | Sypl          |
| 0.882694876  | 0.003562025 | 2.67E-07 | 5 | H2afy         |
| -1.64961799  | 0.003587111 | 2.69E-07 | 5 | Pon3          |
| -1.095632872 | 0.003663792 | 2.74E-07 | 5 | Itga6         |
| 1.305884602  | 0.003741222 | 2.80E-07 | 5 | Myo1g         |
| 0.337435409  | 0.003995238 | 2.99E-07 | 5 | Rps15a-ps4    |
| 0.809790121  | 0.004158004 | 3.11E-07 | 5 | Psme2b        |
| 1.281845196  | 0.004284167 | 3.21E-07 | 5 | Zbtb18        |
| -0.545323939 | 0.00433235  | 3.24E-07 | 5 | Jun           |
| -0.734960823 | 0.00437883  | 3.28E-07 | 5 | Myo5a         |
| -1.674812389 | 0.00443467  | 3.32E-07 | 5 | Cdk18         |
| -0.859113063 | 0.004470465 | 3.35E-07 | 5 | Clec4a3       |
| -0.801140188 | 0.004574993 | 3.43E-07 | 5 | Tmem189       |
| 1.472828826  | 0.004756237 | 3.56E-07 | 5 | Map3k14       |
| -0.592319742 | 0.004936813 | 3.70E-07 | 5 | Laptm4a       |
| 0.454251858  | 0.005182225 | 3.88E-07 | 5 | Crip1         |
| -0.673388614 | 0.005532139 | 4.14E-07 | 5 | Dnase2a       |
| -0.450827619 | 0.005586942 | 4.18E-07 | 5 | Sdc3          |
| 0.599967705  | 0.005716717 | 4.28E-07 | 5 | Rps23         |
| 1.007182021  | 0.005814062 | 4.35E-07 | 5 | Mbtd1         |
| 0.635934774  | 0.005886362 | 4.41E-07 | 5 | Eif5a         |
| -0.667785828 | 0.006141358 | 4.60E-07 | 5 | Hprt          |
| -0.387960154 | 0.006342424 | 4.75E-07 | 5 | Mfsd11        |
| -0.955300566 | 0.006356743 | 4.76E-07 | 5 | Oxct1         |
| -0.532297302 | 0.006653537 | 4.98E-07 | 5 | Aplp2         |
| -1.123502069 | 0.006810822 | 5.10E-07 | 5 | Fcgrt         |
| -1.054057904 | 0.007216097 | 5.40E-07 | 5 | Gab2          |
| -0.274244012 | 0.007329837 | 5.49E-07 | 5 | Scamp2        |
| 1.829594285  | 0.007444398 | 5.58E-07 | 5 | Cd209a        |
| -0.37585472  | 0.007557875 | 5.66E-07 | 5 | Map7d1        |
| -1.094892666 | 0.007901204 | 5.92E-07 | 5 | Uap1l1        |
| -0.442464693 | 0.008508832 | 6.37E-07 | 5 | Lgmn          |
| -0.987818936 | 0.008744998 | 6.55E-07 | 5 | Atp13a2       |
| -1.415895989 | 0.008758337 | 6.56E-07 | 5 | Daglb         |
| -0.561899074 | 0.009296543 | 6.96E-07 | 5 | Axl           |
| 0.515995192  | 0.009344879 | 7.00E-07 | 5 | Rps15a        |
| 0.782470483  | 0.009933834 | 7.44E-07 | 5 | Psmb8         |
| 0.976778013  | 0.010672492 | 7.99E-07 | 5 | Napsa         |
| -0.665644448 | 0.010698899 | 8.01E-07 | 5 | Renbp         |
| -0.438895031 | 0.010818988 | 8.10E-07 | 5 | Gp49a         |
| -0.977384658 | 0.010879307 | 8.15E-07 | 5 | Ptpa          |
| -0.505957814 | 0.011092277 | 8.31E-07 | 5 | Rtn4          |
| 0.516175476  | 0.011480715 | 8.60E-07 | 5 | Rpl35         |
| -0.643112416 | 0.01162034  | 8.70E-07 | 5 | Fam89b        |



|              |             |          |   |               |
|--------------|-------------|----------|---|---------------|
| -0.389066437 | 0.011820389 | 8.85E-07 | 5 | Lilrb4        |
| -0.994115347 | 0.011899466 | 8.91E-07 | 5 | Frmd4b        |
| -0.929344578 | 0.013522356 | 1.01E-06 | 5 | Aprt          |
| -1.930770168 | 0.014045456 | 1.05E-06 | 5 | Stard8        |
| -1.606560562 | 0.014659232 | 1.10E-06 | 5 | Acaa2         |
| -0.878389524 | 0.014845947 | 1.11E-06 | 5 | Sgk1          |
| 0.301578769  | 0.015148147 | 1.13E-06 | 5 | Hsp90ab1      |
| -0.517271381 | 0.015201929 | 1.14E-06 | 5 | Atf3          |
| -1.063960718 | 0.015264681 | 1.14E-06 | 5 | Clec4d        |
| -0.640666432 | 0.0152813   | 1.14E-06 | 5 | Mapk3         |
| -0.537845049 | 0.015683864 | 1.17E-06 | 5 | Ski           |
| -0.615300461 | 0.016124914 | 1.21E-06 | 5 | Mef2a         |
| -0.537852015 | 0.016156048 | 1.21E-06 | 5 | Tnfsf12       |
| -0.378935928 | 0.017348326 | 1.30E-06 | 5 | Qk            |
| -1.056035419 | 0.017783881 | 1.33E-06 | 5 | Milr1         |
| -0.498249795 | 0.01851302  | 1.39E-06 | 5 | Mapre2        |
| 1.598777839  | 0.018699962 | 1.40E-06 | 5 | Klrk1         |
| -0.94436074  | 0.018877368 | 1.41E-06 | 5 | Pmepa1        |
| -0.710446435 | 0.019992621 | 1.50E-06 | 5 | Ccl9          |
| -0.373794246 | 0.021199885 | 1.59E-06 | 5 | Snx5          |
| -0.481727796 | 0.021513555 | 1.61E-06 | 5 | Macf1         |
| -0.649006224 | 0.022051365 | 1.65E-06 | 5 | Ano6          |
| 1.302878465  | 0.022067449 | 1.65E-06 | 5 | Crem          |
| 1.242019537  | 0.022962399 | 1.72E-06 | 5 | Gcnt2         |
| 1.027829187  | 0.023341716 | 1.75E-06 | 5 | Lmnb1         |
| -0.663362298 | 0.024505466 | 1.84E-06 | 5 | Lrpap1        |
| -1.546991385 | 0.024560528 | 1.84E-06 | 5 | P2ry12        |
| -0.73639947  | 0.026189392 | 1.96E-06 | 5 | 0610031J06Rik |
| -1.071706323 | 0.026771757 | 2.01E-06 | 5 | Dnase1l1      |
| -1.917777964 | 0.027947494 | 2.09E-06 | 5 | Nes           |
| -1.615305537 | 0.029552425 | 2.21E-06 | 5 | Pdgfa         |
| 1.333730804  | 0.030575769 | 2.29E-06 | 5 | Cd24a         |
| -1.190119884 | 0.031328629 | 2.35E-06 | 5 | Slc43a2       |
| 0.980026748  | 0.032012624 | 2.40E-06 | 5 | Plbd1         |
| -0.61652601  | 0.033494629 | 2.51E-06 | 5 | Eea1          |
| -0.52633165  | 0.033795036 | 2.53E-06 | 5 | Mef2c         |
| -0.660283218 | 0.035167881 | 2.63E-06 | 5 | Cttnbp2nl     |
| -0.30331375  | 0.035511337 | 2.66E-06 | 5 | Vamp3         |
| -1.58602892  | 0.036457217 | 2.73E-06 | 5 | Wdfy3         |
| -1.377995418 | 0.036617213 | 2.74E-06 | 5 | Clec5a        |
| 0.935422225  | 0.03708674  | 2.78E-06 | 5 | Got1          |
| -0.359171058 | 0.037860728 | 2.84E-06 | 5 | App           |
| -0.923276727 | 0.038675695 | 2.90E-06 | 5 | Fnip2         |
| -0.999176087 | 0.038919994 | 2.91E-06 | 5 | Mrps18a       |
| -0.979257629 | 0.039326721 | 2.95E-06 | 5 | Plbd2         |
| -0.547844184 | 0.039710616 | 2.97E-06 | 5 | Emp1          |
| -0.438892702 | 0.040948769 | 3.07E-06 | 5 | Sdcbp         |
| -0.85871138  | 0.041701847 | 3.12E-06 | 5 | Gde1          |
| 0.779191444  | 0.04325522  | 3.24E-06 | 5 | Ece1          |
| -0.52065538  | 0.043943779 | 3.29E-06 | 5 | Ier2          |
| -0.337676091 | 0.044216267 | 3.31E-06 | 5 | Tcn2          |
| -0.948516433 | 0.052058051 | 3.90E-06 | 5 | Por           |
| -1.467288022 | 0.057572454 | 4.31E-06 | 5 | Mt2           |
| -0.61198205  | 0.059945738 | 4.49E-06 | 5 | Pafah1b2      |
| 0.819711981  | 0.060965298 | 4.57E-06 | 5 | Csf2rb        |
| 0.538601029  | 0.063196506 | 4.73E-06 | 5 | Pcbp2         |
| -0.54900198  | 0.063217026 | 4.73E-06 | 5 | Wbp2          |
| -0.423486008 | 0.064000446 | 4.79E-06 | 5 | Itgam         |
| -0.318363443 | 0.067149095 | 5.03E-06 | 5 | Tgfb1         |
| 0.610703794  | 0.067172971 | 5.03E-06 | 5 | Tma7          |
| -1.199617303 | 0.067802671 | 5.08E-06 | 5 | Itfg3         |

|              |             |          |   |          |
|--------------|-------------|----------|---|----------|
| -0.652812617 | 0.069756761 | 5.22E-06 | 5 | Cyb5r3   |
| -0.615047797 | 0.070415469 | 5.27E-06 | 5 | U2af1l4  |
| 0.793620274  | 0.072346224 | 5.42E-06 | 5 | U2af1    |
| -0.600554893 | 0.072683014 | 5.44E-06 | 5 | Ccrl2    |
| 1.034168539  | 0.072885311 | 5.46E-06 | 5 | Cd274    |
| -0.602826024 | 0.074589516 | 5.59E-06 | 5 | Tubb6    |
| -1.345998883 | 0.078150985 | 5.85E-06 | 5 | Mtmt10   |
| -0.675848022 | 0.078151476 | 5.85E-06 | 5 | Ms4a6b   |
| -0.785688702 | 0.078357525 | 5.87E-06 | 5 | Plod3    |
| -0.58276868  | 0.081527371 | 6.11E-06 | 5 | Plk2     |
| -1.10663974  | 0.082671982 | 6.19E-06 | 5 | Idh2     |
| -0.597535513 | 0.08324489  | 6.23E-06 | 5 | Prkacb   |
| -0.575505576 | 0.084798463 | 6.35E-06 | 5 | Jmjd1c   |
| -0.779622751 | 0.085997457 | 6.44E-06 | 5 | Phlda1   |
| -0.573792282 | 0.08617901  | 6.45E-06 | 5 | Atp6v1b2 |
| 0.704053391  | 0.086675777 | 6.49E-06 | 5 | Btf3     |
| -0.531499218 | 0.088539945 | 6.63E-06 | 5 | Fam3c    |
| 0.704111648  | 0.089470802 | 6.70E-06 | 5 | Map3k1   |
| -0.749608998 | 0.090342729 | 6.77E-06 | 5 | Pilra    |
| 0.4668398    | 0.092551863 | 6.93E-06 | 5 | Npm1     |
| -0.26064809  | 0.094564015 | 7.08E-06 | 5 | Anxa3    |
| -0.773339906 | 0.098091842 | 7.35E-06 | 5 | Cited2   |
| -0.395806509 | 0.10556635  | 7.91E-06 | 5 | Rgs10    |
| 0.972717565  | 0.106066362 | 7.94E-06 | 5 | Bloc1s2  |
| -0.560789958 | 0.10620783  | 7.95E-06 | 5 | Npc1     |
| -1.117678132 | 0.106870097 | 8.00E-06 | 5 | Rasa1    |
| 0.578051171  | 0.107732128 | 8.07E-06 | 5 | Vasp     |
| -0.668255934 | 0.110329535 | 8.26E-06 | 5 | Dok3     |
| 0.968654939  | 0.111739802 | 8.37E-06 | 5 | Tspan13  |
| -0.385534165 | 0.111845642 | 8.38E-06 | 5 | Adam17   |
| 1.216696643  | 0.118837563 | 8.90E-06 | 5 | Traf1    |
| -1.525248543 | 0.119239776 | 8.93E-06 | 5 | Igfbp4   |
| 1.197784992  | 0.122359193 | 9.16E-06 | 5 | Uck2     |
| -1.433396592 | 0.123221067 | 9.23E-06 | 5 | Xdh      |
| -0.38651101  | 0.125058176 | 9.37E-06 | 5 | Tmem59   |
| -1.290714342 | 0.125069219 | 9.37E-06 | 5 | Angptl2  |
| 1.027559138  | 0.125381572 | 9.39E-06 | 5 | Nup210   |
| -1.366944045 | 0.125635799 | 9.41E-06 | 5 | Hk3      |
| -0.581716326 | 0.126703808 | 9.49E-06 | 5 | Fam21    |
| -1.366953126 | 0.127083887 | 9.52E-06 | 5 | Tmem86a  |
| -0.817028042 | 0.129400826 | 9.69E-06 | 5 | Hspa1b   |
| -1.387406192 | 0.129856701 | 9.73E-06 | 5 | Pla2g15  |
| -0.552343967 | 0.138304861 | 1.04E-05 | 5 | Ilk      |
| -0.524769711 | 0.138569431 | 1.04E-05 | 5 | Lmo2     |
| -1.208752291 | 0.140176639 | 1.05E-05 | 5 | Hmg20b   |
| 0.487881034  | 0.141832606 | 1.06E-05 | 5 | Ifitm2   |
| 0.375030641  | 0.147020204 | 1.10E-05 | 5 | Uba52    |
| 0.903402903  | 0.147069251 | 1.10E-05 | 5 | Etv3     |
| -0.978490675 | 0.152775115 | 1.14E-05 | 5 | Vma21    |
| -0.652317239 | 0.160389752 | 1.20E-05 | 5 | Plxnb2   |
| -1.521768535 | 0.164177285 | 1.23E-05 | 5 | Lifr     |
| -0.972706734 | 0.169333143 | 1.27E-05 | 5 | Tlr13    |
| -0.427481355 | 0.16955399  | 1.27E-05 | 5 | Rrbp1    |
| 1.014074156  | 0.173242595 | 1.30E-05 | 5 | Gpr171   |
| -0.847556622 | 0.173782922 | 1.30E-05 | 5 | Lyz1     |
| -0.385384962 | 0.174387952 | 1.31E-05 | 5 | Fos      |
| -0.802526699 | 0.17553806  | 1.31E-05 | 5 | Vat1     |
| -0.418045153 | 0.179220096 | 1.34E-05 | 5 | Wfdc17   |
| -0.943466933 | 0.18189491  | 1.36E-05 | 5 | Pdlim4   |
| -0.792231648 | 0.182925922 | 1.37E-05 | 5 | Tns3     |
| -0.84097121  | 0.18381819  | 1.38E-05 | 5 | Fcgr4    |

|              |             |          |   |               |
|--------------|-------------|----------|---|---------------|
| 0.304304959  | 0.190533198 | 1.43E-05 | 5 | Rps21         |
| -0.769401558 | 0.191386567 | 1.43E-05 | 5 | Snx30         |
| -0.508401619 | 0.192708738 | 1.44E-05 | 5 | Tpd52         |
| 1.164565997  | 0.193256449 | 1.45E-05 | 5 | Gm11974       |
| -0.427110917 | 0.19327564  | 1.45E-05 | 5 | Os9           |
| -0.330975328 | 0.198500421 | 1.49E-05 | 5 | Atp2b1        |
| -1.186778658 | 0.199879214 | 1.50E-05 | 5 | Tmem205       |
| -1.462318227 | 0.20011192  | 1.50E-05 | 5 | Ltc4s         |
| -0.686992113 | 0.203426988 | 1.52E-05 | 5 | Dnmt3a        |
| -0.660960249 | 0.203893549 | 1.53E-05 | 5 | Cpt1a         |
| -0.447888433 | 0.205327122 | 1.54E-05 | 5 | Sdc4          |
| -0.340820249 | 0.205374509 | 1.54E-05 | 5 | Mat2a         |
| 1.265947851  | 0.212302873 | 1.59E-05 | 5 | Ahr           |
| -0.468891112 | 0.217604923 | 1.63E-05 | 5 | Fuca1         |
| -0.523128556 | 0.222556574 | 1.67E-05 | 5 | Ergic3        |
| -1.091724855 | 0.222673526 | 1.67E-05 | 5 | Idh1          |
| -1.441202972 | 0.224265132 | 1.68E-05 | 5 | Lonrf3        |
| 0.722057601  | 0.226049101 | 1.69E-05 | 5 | Il2rg         |
| 0.619449515  | 0.226663346 | 1.70E-05 | 5 | Il1b          |
| -0.652749375 | 0.227219736 | 1.70E-05 | 5 | Plec          |
| 0.448694804  | 0.237211328 | 1.78E-05 | 5 | S100a6        |
| 2.157322267  | 0.237936457 | 1.78E-05 | 5 | Ly6d          |
| -1.52194803  | 0.238844276 | 1.79E-05 | 5 | Maf           |
| -0.322418151 | 0.240582434 | 1.80E-05 | 5 | Rabac1        |
| -0.987321735 | 0.241055074 | 1.81E-05 | 5 | Gas2l3        |
| -0.774161437 | 0.254548904 | 1.91E-05 | 5 | Cebpg         |
| -1.659944644 | 0.272681082 | 2.04E-05 | 5 | Dusp6         |
| -0.756285218 | 0.272831002 | 2.04E-05 | 5 | Blvra         |
| -0.341637714 | 0.285963698 | 2.14E-05 | 5 | Stom          |
| -1.06534556  | 0.29052641  | 2.18E-05 | 5 | Ube3a         |
| -0.572301101 | 0.301551456 | 2.26E-05 | 5 | Entpd1        |
| 1.271375174  | 0.30773888  | 2.30E-05 | 5 | B3gnt5        |
| -1.310163487 | 0.311487639 | 2.33E-05 | 5 | Lhfpl2        |
| -1.432998032 | 0.311705319 | 2.33E-05 | 5 | Cmklr1        |
| -0.444803789 | 0.329941428 | 2.47E-05 | 5 | Ppp1r12c      |
| -0.41607631  | 0.330537849 | 2.48E-05 | 5 | Pfdn1         |
| -0.806942406 | 0.338148231 | 2.53E-05 | 5 | 1110058L19Rik |
| -0.895520105 | 0.340727599 | 2.55E-05 | 5 | Pdxk          |
| -0.807937957 | 0.372344474 | 2.79E-05 | 5 | Alg5          |
| -0.581864214 | 0.375381948 | 2.81E-05 | 5 | Zfand2a       |
| -0.474979029 | 0.38764589  | 2.90E-05 | 5 | Psmd12        |
| 0.508317216  | 0.397226983 | 2.98E-05 | 5 | Rps10         |
| -0.374522356 | 0.398068597 | 2.98E-05 | 5 | Ociad1        |
| -0.602646379 | 0.42806453  | 3.21E-05 | 5 | Nupr1         |
| -0.547476793 | 0.430087003 | 3.22E-05 | 5 | Adam15        |
| -0.374773675 | 0.440125906 | 3.30E-05 | 5 | Emp3          |
| -1.285937565 | 0.441839672 | 3.31E-05 | 5 | Abca9         |
| 0.33258979   | 0.444645555 | 3.33E-05 | 5 | Rps3          |
| -0.467973172 | 0.447106666 | 3.35E-05 | 5 | Tbxas1        |
| -1.698698246 | 0.456922828 | 3.42E-05 | 5 | Ccl8          |
| -0.311194944 | 0.46367709  | 3.47E-05 | 5 | Cenpb         |
| -0.5200636   | 0.468811112 | 3.51E-05 | 5 | Rragc         |
| 1.090869045  | 0.482212852 | 3.61E-05 | 5 | Grasp         |
| -0.44072602  | 0.509824285 | 3.82E-05 | 5 | Krtcap2       |
| -0.277699198 | 0.515753594 | 3.86E-05 | 5 | Rasgef1b      |
| -0.845253353 | 0.517274323 | 3.87E-05 | 5 | Dynlt3        |
| 0.280992257  | 0.535975432 | 4.01E-05 | 5 | Sh3bgrl3      |
| 0.777613564  | 0.548242619 | 4.11E-05 | 5 | Nr4a2         |
| -1.387057205 | 0.559801914 | 4.19E-05 | 5 | Pura          |
| -1.484194694 | 0.564637289 | 4.23E-05 | 5 | Itga9         |
| -0.748575585 | 0.583438277 | 4.37E-05 | 5 | Fam195b       |

|              |             |          |   |               |
|--------------|-------------|----------|---|---------------|
| -1.084905842 | 0.585760634 | 4.39E-05 | 5 | Galc          |
| 0.982923423  | 0.589072349 | 4.41E-05 | 5 | Gng10         |
| -0.486071657 | 0.590501222 | 4.42E-05 | 5 | Scamp3        |
| 1.34783991   | 0.601414563 | 4.50E-05 | 5 | Stat4         |
| 1.0078021    | 0.602506618 | 4.51E-05 | 5 | Pmvk          |
| 0.776716976  | 0.605956659 | 4.54E-05 | 5 | Dennd4a       |
| -0.48714057  | 0.614579637 | 4.60E-05 | 5 | Fam46a        |
| -1.318051698 | 0.620504894 | 4.65E-05 | 5 | Cyb561d2      |
| 0.662803069  | 0.631048928 | 4.73E-05 | 5 | Sec61b        |
| -0.678087908 | 0.631723819 | 4.73E-05 | 5 | Ndufs7        |
| -1.176095447 | 0.633136969 | 4.74E-05 | 5 | 1810011H11Rik |
| -0.682195114 | 0.636518173 | 4.77E-05 | 5 | Ppt2          |
| -1.569463489 | 0.636601729 | 4.77E-05 | 5 | Fblim1        |
| -2.070394552 | 0.640882635 | 4.80E-05 | 5 | Lyve1         |
| -1.244311169 | 0.663346973 | 4.97E-05 | 5 | Slc16a10      |
| 0.320347549  | 0.663834115 | 4.97E-05 | 5 | Lrrc58        |
| -0.801947471 | 0.68674538  | 5.14E-05 | 5 | Tmem43        |
| -0.566397652 | 0.690602908 | 5.17E-05 | 5 | Gng2          |
| -0.555043873 | 0.692862809 | 5.19E-05 | 5 | Bin1          |
| -0.605324605 | 0.704845269 | 5.28E-05 | 5 | Glipr1        |
| 0.434602522  | 0.707461453 | 5.30E-05 | 5 | Cnbp          |
| 1.170829145  | 0.716852064 | 5.37E-05 | 5 | Pvrl1         |
| -0.310125354 | 0.721073538 | 5.40E-05 | 5 | Rnf13         |
| 0.366763363  | 0.738677082 | 5.53E-05 | 5 | Naca          |
| 0.844167162  | 0.739183041 | 5.54E-05 | 5 | Psma5         |
| -1.203982239 | 0.75304195  | 5.64E-05 | 5 | Slc29a1       |
| -0.862692918 | 0.762700358 | 5.71E-05 | 5 | Ctnnd1        |
| -0.589906078 | 0.77508714  | 5.81E-05 | 5 | Atp6v1e1      |
| 0.284738471  | 0.804381853 | 6.02E-05 | 5 | Hnrnpf        |
| -0.458261456 | 0.818170129 | 6.13E-05 | 5 | Ncf1          |
| -0.966462662 | 0.828168311 | 6.20E-05 | 5 | Phb           |
| -0.603093587 | 0.838673933 | 6.28E-05 | 5 | Sptlc2        |
| -1.029035505 | 0.849646653 | 6.36E-05 | 5 | Abcc3         |
| -1.393575654 | 0.850779461 | 6.37E-05 | 5 | Slc6a8        |
| -0.566927962 | 0.866464972 | 6.49E-05 | 5 | Gnaq          |
| -1.287978709 | 0.878546229 | 6.58E-05 | 5 | Arap3         |
| -0.9564384   | 0.943307571 | 7.06E-05 | 5 | Ppm1h         |
| -0.45585644  | 0.954298926 | 7.15E-05 | 5 | Szrd1         |
| 0.894742956  | 0.977319814 | 7.32E-05 | 5 | Malt1         |
| -0.436203874 | 0.989063324 | 7.41E-05 | 5 | Lamtor4       |
| -0.543018359 | 0.992273875 | 7.43E-05 | 5 | Arhgap17      |
| -0.7073461   | 0.993577365 | 7.44E-05 | 5 | Itgav         |
| -0.595429288 | 0.995720377 | 7.46E-05 | 5 | Pttg1ip       |
| 0.477232888  | 1           | 7.67E-05 | 5 | Ywhaz         |
| -0.504859525 | 1           | 7.95E-05 | 5 | Cpsf2         |
| -0.535267715 | 1           | 8.05E-05 | 5 | Ifnar1        |
| -0.299015507 | 1           | 8.23E-05 | 5 | Nckap1l       |
| -0.733783956 | 1           | 8.25E-05 | 5 | Bag3          |
| -1.164419451 | 1           | 8.36E-05 | 5 | Map4k3        |
| -0.485458444 | 1           | 8.41E-05 | 5 | Mmp14         |
| -0.336760072 | 1           | 8.47E-05 | 5 | Usf2          |
| 1.04137251   | 1           | 8.48E-05 | 5 | Rhof          |
| -0.636072285 | 1           | 8.64E-05 | 5 | Man1c1        |
| -0.340923036 | 1           | 8.78E-05 | 5 | Magt1         |
| -0.339085232 | 1           | 8.78E-05 | 5 | Itgb1         |
| -0.429349333 | 1           | 8.78E-05 | 5 | Bag6          |
| -1.173686264 | 1           | 8.86E-05 | 5 | Slc9a9        |
| -0.697199049 | 1           | 8.97E-05 | 5 | Sfmbt1        |
| -0.578090027 | 1           | 9.04E-05 | 5 | Gatm          |
| 0.613838274  | 1           | 9.20E-05 | 5 | Hmgb2         |
| -0.742058353 | 1           | 9.20E-05 | 5 | Pacsin2       |

|              |   |           |   |               |        |
|--------------|---|-----------|---|---------------|--------|
| -0.330234334 | 1 | 9.35E-05  | 5 | Nisch         |        |
| -0.441325524 | 1 | 9.36E-05  | 5 | Grina         |        |
| -1.037697608 | 1 | 9.45E-05  | 5 | Ulk2          |        |
| -0.361843147 | 1 | 9.58E-05  | 5 | Ash1l         |        |
| -0.611459496 | 1 | 9.59E-05  | 5 | Bcl2l1        |        |
| -0.289637721 | 1 | 9.70E-05  | 5 | Atp6v1h       |        |
| -0.665856005 | 1 | 9.92E-05  | 5 | Lxn           |        |
| -0.671053954 | 1 | 9.99E-05  | 5 | Casp4         |        |
| -0.329112895 | 1 | 0.0001    | 5 | AF251705      |        |
| -0.358927861 | 1 | 0.0001009 | 5 | Myliip        |        |
| -0.455960248 | 1 | 0.0001011 | 5 | Peak1         |        |
| -0.512068615 | 1 | 0.0001066 | 5 | Cebpb         |        |
| 0.977476416  | 1 | 0.0001078 | 5 |               | Sep.06 |
| -0.547350271 | 1 | 0.0001089 | 5 | Rnpep         |        |
| -0.664741147 | 1 | 0.0001089 | 5 | Lilra5        |        |
| 0.933637736  | 1 | 0.0001091 | 5 | Isy1          |        |
| 0.694511906  | 1 | 0.0001099 | 5 | Rpl22l1       |        |
| -0.807861597 | 1 | 0.0001103 | 5 | Ccrn4l        |        |
| 1.056584205  | 1 | 0.0001116 | 5 | Birc2         |        |
| -0.380192209 | 1 | 0.000113  | 5 | Ly86          |        |
| 0.417295461  | 1 | 0.0001159 | 5 | Sik3          |        |
| -0.701053969 | 1 | 0.0001179 | 5 | Ascc3         |        |
| -0.581301622 | 1 | 0.0001198 | 5 | Pitpnc1       |        |
| -0.815639467 | 1 | 0.0001218 | 5 | Add1          |        |
| -0.652814698 | 1 | 0.0001241 | 5 | Myo1e         |        |
| -0.285860496 | 1 | 0.0001246 | 5 | Prkcb         |        |
| -0.574781567 | 1 | 0.0001261 | 5 | Igsf6         |        |
| -1.244539112 | 1 | 0.0001287 | 5 | Crat          |        |
| -0.531500263 | 1 | 0.0001319 | 5 | Trip11        |        |
| -0.326629162 | 1 | 0.0001331 | 5 | Rap2b         |        |
| -0.464770623 | 1 | 0.0001367 | 5 | Vdac2         |        |
| -0.378059836 | 1 | 0.0001373 | 5 | A230046K03Rik |        |
| -1.358578875 | 1 | 0.0001385 | 5 | Igf2r         |        |
| -0.673003978 | 1 | 0.0001468 | 5 | Rufy1         |        |
| 0.45893057   | 1 | 0.0001479 | 5 | Gm6402        |        |
| -0.538900711 | 1 | 0.0001504 | 5 | Rnf7          |        |
| -0.769257999 | 1 | 0.0001521 | 5 | Mrps15        |        |
| -0.268664554 | 1 | 0.0001543 | 5 | Rcbtb2        |        |
| -1.142194751 | 1 | 0.0001547 | 5 | Arhgap22      |        |
| -0.570670789 | 1 | 0.0001556 | 5 | Polr2f        |        |
| -0.680952456 | 1 | 0.0001561 | 5 | Leprot        |        |
| -0.563991506 | 1 | 0.0001574 | 5 | Nrp2          |        |
| -0.711915124 | 1 | 0.0001579 | 5 | Kpnb1         |        |
| 0.618732767  | 1 | 0.0001589 | 5 | Sik1          |        |
| 1.166200449  | 1 | 0.00016   | 5 | Arl5c         |        |
| -1.060364733 | 1 | 0.0001602 | 5 | Rnf150        |        |
| -1.238079662 | 1 | 0.0001639 | 5 | Gtf3a         |        |
| -0.882721643 | 1 | 0.0001653 | 5 | Tbpl1         |        |
| -0.632870708 | 1 | 0.0001667 | 5 | Cmtm3         |        |
| 1.077376292  | 1 | 0.0001671 | 5 | Cmtr1         |        |
| -0.962572843 | 1 | 0.0001683 | 5 | Sepn1         |        |
| -0.64186369  | 1 | 0.0001685 | 5 | Capn2         |        |
| -0.419765401 | 1 | 0.0001738 | 5 | Atp1b3        |        |
| -1.552526134 | 1 | 0.000177  | 5 | P2rx7         |        |
| -0.458308584 | 1 | 0.0001778 | 5 | Rock2         |        |
| -0.684632451 | 1 | 0.0001786 | 5 | Gmfb          |        |
| -0.483214453 | 1 | 0.0001804 | 5 | Prdx5         |        |
| -0.750242635 | 1 | 0.0001804 | 5 | Pik3cg        |        |
| -0.461556009 | 1 | 0.0001831 | 5 | Vkorc1        |        |
| 0.842920931  | 1 | 0.0001839 | 5 | Spint1        |        |
| -1.526140722 | 1 | 0.0001853 | 5 | Slco2b1       |        |

|              |   |           |   |          |
|--------------|---|-----------|---|----------|
| -0.86326547  | 1 | 0.0001883 | 5 | Mpv17    |
| -0.65017453  | 1 | 0.0001896 | 5 | lqgap2   |
| -1.201354672 | 1 | 0.0001906 | 5 | Trim47   |
| -0.550227222 | 1 | 0.0001906 | 5 | Cpeb4    |
| -0.725844192 | 1 | 0.0001922 | 5 | Mbd3     |
| -0.837476424 | 1 | 0.0001935 | 5 | Selm     |
| -0.34174276  | 1 | 0.000195  | 5 | ltgb2    |
| -0.455538962 | 1 | 0.0001953 | 5 | Hook3    |
| -0.470391443 | 1 | 0.0001964 | 5 | Ech1     |
| -0.349840982 | 1 | 0.0001981 | 5 | Rab14    |
| -1.529967641 | 1 | 0.0002    | 5 | Pkp4     |
| -1.069749835 | 1 | 0.0002    | 5 | Pofut2   |
| 0.736499579  | 1 | 0.0002038 | 5 | Slc7a11  |
| -0.754230793 | 1 | 0.0002128 | 5 | Cgrrf1   |
| -0.77849581  | 1 | 0.0002156 | 5 | Stx3     |
| -0.851045195 | 1 | 0.0002217 | 5 | Hcst     |
| -0.965951586 | 1 | 0.0002222 | 5 | Mgat1    |
| -0.268313207 | 1 | 0.0002224 | 5 | Fcer1g   |
| -1.092498879 | 1 | 0.0002307 | 5 | Pros1    |
| -0.294704474 | 1 | 0.0002323 | 5 | Snx2     |
| -0.335472202 | 1 | 0.0002329 | 5 | Napa     |
| -1.688193069 | 1 | 0.0002339 | 5 | Syngn1   |
| -0.591683636 | 1 | 0.0002368 | 5 | Ap3d1    |
| -0.868709526 | 1 | 0.000239  | 5 | Hgsnat   |
| -0.276178472 | 1 | 0.0002393 | 5 | Rel1     |
| -0.323175494 | 1 | 0.0002414 | 5 | Fam111a  |
| -1.07170922  | 1 | 0.0002426 | 5 | Hpgd     |
| -0.347752308 | 1 | 0.0002452 | 5 | Elovl1   |
| -1.359764485 | 1 | 0.0002492 | 5 | Oxr1     |
| -0.360119031 | 1 | 0.0002505 | 5 | Spred1   |
| -0.458013973 | 1 | 0.0002517 | 5 | Metap2   |
| -1.234041404 | 1 | 0.000252  | 5 | Arl11    |
| -0.707419457 | 1 | 0.0002539 | 5 | Ldlrap1  |
| -0.494497449 | 1 | 0.0002559 | 5 | Tnfaip2  |
| -1.559338511 | 1 | 0.0002593 | 5 | C4b      |
| -0.644639366 | 1 | 0.0002616 | 5 | Pitpnb   |
| -0.589539365 | 1 | 0.0002623 | 5 | Ap1s2    |
| -0.566021705 | 1 | 0.0002631 | 5 | Lpcat3   |
| -0.47373965  | 1 | 0.0002634 | 5 | Fcho2    |
| -0.763419222 | 1 | 0.0002661 | 5 | Serpinb8 |
| -0.720923813 | 1 | 0.0002751 | 5 | Neu1     |
| -0.56053922  | 1 | 0.0002755 | 5 | Sod2     |
| -0.281073544 | 1 | 0.0002766 | 5 | Eif2ak1  |
| -1.111390897 | 1 | 0.0002776 | 5 | Olfml3   |
| 0.757413136  | 1 | 0.0002776 | 5 | Rel      |
| 0.601609669  | 1 | 0.0002797 | 5 | Hnrnpa1  |
| 0.73024465   | 1 | 0.0002833 | 5 | Dnajb6   |
| 0.6230168    | 1 | 0.0002839 | 5 | Ube2j2   |
| -1.433557409 | 1 | 0.0002842 | 5 | Ctla2b   |
| 0.419636084  | 1 | 0.0002865 | 5 | Rpl7     |
| -0.632130315 | 1 | 0.000291  | 5 | BC031181 |
| 0.523538507  | 1 | 0.0002937 | 5 | Rab8b    |
| -0.297993306 | 1 | 0.0002962 | 5 | Ebp      |
| 0.334311148  | 1 | 0.0002966 | 5 | Eif4a1   |
| -0.470172929 | 1 | 0.0002983 | 5 | Cuedc2   |
| -0.551266538 | 1 | 0.0003007 | 5 | lfngr2   |
| -0.331427374 | 1 | 0.0003032 | 5 | Ypel3    |
| -0.430347953 | 1 | 0.0003073 | 5 | Arhgef3  |
| -0.387320444 | 1 | 0.0003094 | 5 | Rnf187   |
| -0.325812637 | 1 | 0.0003128 | 5 | Epb4.1l2 |
| -0.286189623 | 1 | 0.000315  | 5 | Eif4ebp1 |

|              |   |           |   |           |
|--------------|---|-----------|---|-----------|
| 0.299828922  | 1 | 0.000327  | 5 | Cst3      |
| -0.768347011 | 1 | 0.0003284 | 5 | Syt11     |
| 0.393915281  | 1 | 0.0003316 | 5 | Rpl3      |
| -1.88257877  | 1 | 0.0003359 | 5 | Cd163     |
| -0.578999616 | 1 | 0.0003382 | 5 | Slc25a28  |
| -0.893616692 | 1 | 0.0003408 | 5 | P4ha1     |
| -0.334407618 | 1 | 0.0003424 | 5 | Coa3      |
| -0.372180341 | 1 | 0.0003429 | 5 | Pnp       |
| -0.801120596 | 1 | 0.0003478 | 5 | Dtnbp1    |
| -0.413414973 | 1 | 0.000348  | 5 | Jak1      |
| -0.529078517 | 1 | 0.0003486 | 5 | Tec       |
| 0.921984816  | 1 | 0.0003505 | 5 | Ccnd2     |
| 0.59694126   | 1 | 0.0003507 | 5 | Cd82      |
| -0.584654652 | 1 | 0.0003609 | 5 | Lima1     |
| -0.54083807  | 1 | 0.000369  | 5 | Clock     |
| -0.301861475 | 1 | 0.0003703 | 5 | Mdm2      |
| 0.840250962  | 1 | 0.000371  | 5 | Adrbk2    |
| 0.576833763  | 1 | 0.0003731 | 5 | Atp5l     |
| -0.575606037 | 1 | 0.0003846 | 5 | Mrpl57    |
| -0.618941557 | 1 | 0.0003869 | 5 | Cadm1     |
| -0.594939003 | 1 | 0.0003873 | 5 | Lacc1     |
| -0.442276095 | 1 | 0.0003938 | 5 | Smc1a     |
| 0.761852216  | 1 | 0.0003964 | 5 | Nsa2      |
| -0.732362388 | 1 | 0.0003965 | 5 | Leprotl1  |
| -0.281616686 | 1 | 0.0003966 | 5 | Pld4      |
| -0.523080647 | 1 | 0.0003985 | 5 | Adcy7     |
| -1.315092134 | 1 | 0.0004003 | 5 | Fmn1      |
| -1.070991825 | 1 | 0.0004068 | 5 | Rfc1      |
| -0.526181689 | 1 | 0.0004121 | 5 | Map4      |
| -1.327928194 | 1 | 0.000416  | 5 | Ltbp3     |
| 0.773096401  | 1 | 0.0004205 | 5 | Elmsan1   |
| -0.463088835 | 1 | 0.0004214 | 5 | Tmem234   |
| -0.54023024  | 1 | 0.0004241 | 5 | Baz1b     |
| -0.499003574 | 1 | 0.0004342 | 5 | Atp8b4    |
| -0.407073876 | 1 | 0.0004375 | 5 | Hsbp1     |
| -0.861887736 | 1 | 0.0004397 | 5 | Aldh3b1   |
| -1.402836726 | 1 | 0.0004407 | 5 | Fgd4      |
| -1.508428661 | 1 | 0.0004437 | 5 | Fam20c    |
| -0.393576485 | 1 | 0.0004472 | 5 | Ppp1r18   |
| 0.496925296  | 1 | 0.0004524 | 5 | Eef1b2    |
| -0.553803508 | 1 | 0.0004697 | 5 | Stt3b     |
| -0.440242687 | 1 | 0.0004759 | 5 | Aip       |
| -1.097706734 | 1 | 0.0004775 | 5 | Plekhg3   |
| -0.322366986 | 1 | 0.000489  | 5 | Tmem109   |
| -0.850246158 | 1 | 0.0004891 | 5 | Dpep2     |
| -0.813941785 | 1 | 0.0004907 | 5 | Itsn1     |
| -0.270347031 | 1 | 0.0004969 | 5 | Evi2a     |
| -1.203842153 | 1 | 0.000515  | 5 | Cpq       |
| -0.40977277  | 1 | 0.0005172 | 5 | Adam10    |
| -0.881352066 | 1 | 0.0005259 | 5 | Snpc5     |
| -1.0473474   | 1 | 0.0005278 | 5 | Ntpcr     |
| -0.338310629 | 1 | 0.0005279 | 5 | Ifi27l2a  |
| -0.362381433 | 1 | 0.0005322 | 5 | Tecr      |
| -0.394894779 | 1 | 0.000536  | 5 | Tmem30a   |
| -0.709937566 | 1 | 0.0005418 | 5 | B4galt6   |
| -1.459028099 | 1 | 0.0005423 | 5 | Fez2      |
| -0.583525702 | 1 | 0.0005451 | 5 | Man2a1    |
| -0.974426395 | 1 | 0.0005464 | 5 | Kidins220 |
| 1.457774207  | 1 | 0.0005516 | 5 | Mcomp1    |
| -0.410411161 | 1 | 0.0005619 | 5 | Fundc2    |
| -0.514806463 | 1 | 0.0005699 | 5 | D17Wsu92e |

|              |   |           |   |               |
|--------------|---|-----------|---|---------------|
| 1.110990465  | 1 | 0.0005755 | 5 | Arap2         |
| -0.370972099 | 1 | 0.0005836 | 5 | Lst1          |
| -0.840025279 | 1 | 0.000603  | 5 | Ip6k1         |
| 0.585965603  | 1 | 0.0006034 | 5 | Heatr3        |
| -1.122597754 | 1 | 0.0006064 | 5 | Aoah          |
| -0.463036011 | 1 | 0.0006094 | 5 | Parp2         |
| -0.753455666 | 1 | 0.0006232 | 5 | Mrpl13        |
| -0.326111406 | 1 | 0.000627  | 5 | Jkamp         |
| -0.325240969 | 1 | 0.0006369 | 5 | Sdhd          |
| -0.506825443 | 1 | 0.000645  | 5 | Nagk          |
| -0.315446404 | 1 | 0.0006451 | 5 | Man2b1        |
| -0.318124433 | 1 | 0.0006513 | 5 | Fkbp2         |
| -0.282876772 | 1 | 0.0006516 | 5 | Dlgap4        |
| -1.075322038 | 1 | 0.0006562 | 5 | Ophn1         |
| -0.442200492 | 1 | 0.0006622 | 5 | Lrp6          |
| -0.89356742  | 1 | 0.0006624 | 5 | Tmem55a       |
| -0.287411559 | 1 | 0.0006637 | 5 | Ap1b1         |
| -1.094453487 | 1 | 0.000668  | 5 | Tmem106b      |
| -1.125888066 | 1 | 0.0006777 | 5 | Gpnmb         |
| -0.683458926 | 1 | 0.0006798 | 5 | Slc7a7        |
| -0.265869112 | 1 | 0.0006896 | 5 | Wdr26         |
| -0.650108262 | 1 | 0.0006906 | 5 | 0610012G03Rik |
| -0.437978241 | 1 | 0.000704  | 5 | Exoc6b        |
| -0.614139265 | 1 | 0.0007101 | 5 | Diap2         |
| -0.490185817 | 1 | 0.0007136 | 5 | Frrs1         |
| -0.308218297 | 1 | 0.0007177 | 5 | Wbp4          |
| -0.725047776 | 1 | 0.0007249 | 5 | Prdx4         |
| -0.48065619  | 1 | 0.0007379 | 5 | Tmbim1        |
| 0.255783356  | 1 | 0.0007521 | 5 | Cox6b1        |
| -0.857408894 | 1 | 0.0007526 | 5 | Ubqln2        |
| -0.431419618 | 1 | 0.0007551 | 5 | Tlk1          |
| -0.512265816 | 1 | 0.000756  | 5 | Ctns          |
| -0.376613828 | 1 | 0.0007733 | 5 | Derl1         |
| -0.510572816 | 1 | 0.0007742 | 5 | Psmc5         |
| -0.342699874 | 1 | 0.0007874 | 5 | Gsk3b         |
| -0.893935258 | 1 | 0.000788  | 5 | Clcn7         |
| -0.496539995 | 1 | 0.0007906 | 5 | Atp6v1c1      |
| -0.271031884 | 1 | 0.0007952 | 5 | S100a13       |
| -0.432245626 | 1 | 0.0007978 | 5 | Acsl4         |
| -0.925262248 | 1 | 0.0008006 | 5 | Plod1         |
| -0.618477539 | 1 | 0.0008177 | 5 | Senp2         |
| -0.339628705 | 1 | 0.0008194 | 5 | Gadd45g       |
| -0.567483946 | 1 | 0.0008334 | 5 | Dnajc13       |
| -1.008091164 | 1 | 0.0008368 | 5 | Tmem206       |
| -0.582557208 | 1 | 0.0008437 | 5 | Agps          |
| -0.439208225 | 1 | 0.0008506 | 5 | Bag1          |
| -0.316546302 | 1 | 0.0008522 | 5 | Tsc22d3       |
| -0.882099367 | 1 | 0.0008626 | 5 | Acp5          |
| 0.442049846  | 1 | 0.0008683 | 5 | Ppp1ca        |
| -1.056307932 | 1 | 0.0008802 | 5 | Aldh9a1       |
| -0.282898403 | 1 | 0.0008874 | 5 | Tor1aip1      |
| -0.364969097 | 1 | 0.0008943 | 5 | Ssh2          |
| -1.124428307 | 1 | 0.0008957 | 5 | Rfc2          |
| -0.726335722 | 1 | 0.0009083 | 5 | Tmcc3         |
| -0.620153733 | 1 | 0.0009162 | 5 | Apc           |
| -0.40869423  | 1 | 0.0009173 | 5 | Txn1          |
| -0.292005158 | 1 | 0.0009212 | 5 | Tmed3         |
| -0.370780875 | 1 | 0.0009244 | 5 | Slc15a3       |
| -1.04529448  | 1 | 0.0009268 | 5 | Nbr1          |
| -0.906671008 | 1 | 0.000936  | 5 | Atp2b4        |
| -0.531586233 | 1 | 0.0009388 | 5 | Kif1b         |



|              |   |           |   |               |
|--------------|---|-----------|---|---------------|
| -1.147523461 | 1 | 0.0009553 | 5 | Col14a1       |
| -0.285631543 | 1 | 0.0009557 | 5 | Slc6a6        |
| 0.51746133   | 1 | 0.0009567 | 5 | Srsf3         |
| 0.535007701  | 1 | 0.0009585 | 5 | Rpl23         |
| -1.011820692 | 1 | 0.0009613 | 5 | St3gal6       |
| -0.272952144 | 1 | 0.0009761 | 5 | Kdm7a         |
| -0.632498688 | 1 | 0.000994  | 5 | Prrc1         |
| -0.864315865 | 1 | 0.0009964 | 5 | Scoc          |
| -0.356677018 | 1 | 0.0010052 | 5 | Scaf11        |
| -0.843985581 | 1 | 0.0010115 | 5 | Sgsh          |
| -0.675627708 | 1 | 0.0010188 | 5 | Pik3ca        |
| -0.293755399 | 1 | 0.0010274 | 5 | Apobr         |
| -0.816605656 | 1 | 0.0010317 | 5 | Agap3         |
| 0.887644053  | 1 | 0.0010328 | 5 | Runx3         |
| -0.267529332 | 1 | 0.0010337 | 5 | Ehbp1l1       |
| -0.34246911  | 1 | 0.0010473 | 5 | Gpr65         |
| -0.591158506 | 1 | 0.001048  | 5 | Nlrp3         |
| -0.974467562 | 1 | 0.001055  | 5 | Cyp4v3        |
| -0.660875738 | 1 | 0.0010626 | 5 | Med15         |
| -0.520850291 | 1 | 0.0010647 | 5 | Cds2          |
| 0.314137102  | 1 | 0.0010656 | 5 | Rpl4          |
| -0.7739743   | 1 | 0.0010817 | 5 | Smagp         |
| -0.345416875 | 1 | 0.0010846 | 5 | Hip1          |
| -1.149136989 | 1 | 0.0010877 | 5 | Tex264        |
| -0.295838677 | 1 | 0.001088  | 5 | Mctp1         |
| -0.273147777 | 1 | 0.0010925 | 5 | Rbm5          |
| -0.310793679 | 1 | 0.0010949 | 5 | Cdt1          |
| -0.649070704 | 1 | 0.0010978 | 5 | Adap2         |
| -0.660522129 | 1 | 0.0011022 | 5 | Usp24         |
| -0.646371858 | 1 | 0.0011088 | 5 | Hadh          |
| 0.784924995  | 1 | 0.0011171 | 5 | Map4k1        |
| 0.947626845  | 1 | 0.0011229 | 5 | Vps37b        |
| -0.804930834 | 1 | 0.0011236 | 5 | Stxbp5        |
| -0.970408038 | 1 | 0.0011237 | 5 | Arhgap10      |
| -0.426653285 | 1 | 0.0011366 | 5 | 1810058I24Rik |
| -0.328523016 | 1 | 0.0011497 | 5 | BC003331      |
| -0.827612322 | 1 | 0.0011579 | 5 | 1700017B05Rik |
| -0.306420219 | 1 | 0.0011597 | 5 | Bsg           |
| -1.175929419 | 1 | 0.0011616 | 5 | Creb5         |
| -0.764215406 | 1 | 0.0011661 | 5 | Mfsd5         |
| -0.470185364 | 1 | 0.0011663 | 5 | Cox20         |
| -1.021331795 | 1 | 0.0011718 | 5 | Tmem214       |
| -0.714118984 | 1 | 0.0011861 | 5 | Ephx1         |
| -0.434312123 | 1 | 0.00119   | 5 | Atp7a         |
| -0.78717283  | 1 | 0.0011966 | 5 | Baiap2        |
| 0.354551319  | 1 | 0.0012132 | 5 | Msn           |
| -0.788402902 | 1 | 0.0012395 | 5 | Ncln          |
| -0.540681884 | 1 | 0.0012768 | 5 | Trappc2l      |
| -1.069682199 | 1 | 0.001277  | 5 | Alox5         |
| -0.295919981 | 1 | 0.0012774 | 5 | Polr2j        |
| -0.361834209 | 1 | 0.0012929 | 5 | Cab39         |
| 0.615328858  | 1 | 0.0012944 | 5 | Psme1         |
| -0.267597417 | 1 | 0.001296  | 5 | Csf2ra        |
| -1.253090814 | 1 | 0.0013276 | 5 | Ptgs1         |
| -1.090525165 | 1 | 0.0013278 | 5 | Ch25h         |
| -0.439984354 | 1 | 0.0013421 | 5 | Cers2         |
| -0.262680087 | 1 | 0.0013441 | 5 | 1110007C09Rik |
| 1.637732508  | 1 | 0.0013649 | 5 | Cyb561a3      |
| 0.857686053  | 1 | 0.0013658 | 5 | Cbfa2t3       |
| -0.329565914 | 1 | 0.0013852 | 5 | Flna          |
| 0.442810747  | 1 | 0.001424  | 5 | Pcgf5         |

|              |   |           |   |          |
|--------------|---|-----------|---|----------|
| 0.26011652   | 1 | 0.0015057 | 5 | Son      |
| -0.401012668 | 1 | 0.0015127 | 5 | Abi1     |
| -0.662562497 | 1 | 0.0015167 | 5 | Actr8    |
| -0.283985049 | 1 | 0.0015243 | 5 | Glg1     |
| -0.438210863 | 1 | 0.0015368 | 5 | Utp11l   |
| -0.48810304  | 1 | 0.0015479 | 5 | Usp48    |
| -0.745515705 | 1 | 0.0015508 | 5 | Slc31a1  |
| -0.413677797 | 1 | 0.0015579 | 5 | Itgb1bp1 |
| 1.44078882   | 1 | 0.0015638 | 5 | Tbc1d8   |
| -0.913584408 | 1 | 0.0015741 | 5 | Stard3   |
| -0.481026815 | 1 | 0.0016089 | 5 | Usp14    |
| -0.533324976 | 1 | 0.001611  | 5 | Chordc1  |
| -0.523101835 | 1 | 0.0016146 | 5 | Bre      |
| 0.346127535  | 1 | 0.0016153 | 5 | Rpl37    |
| -0.327649271 | 1 | 0.0016193 | 5 | Myo1f    |
| 0.813371681  | 1 | 0.0016242 | 5 | Fig4     |
| -0.43720449  | 1 | 0.0016298 | 5 | Cops8    |
| 0.340952663  | 1 | 0.00165   | 5 | Rhog     |
| -0.463456196 | 1 | 0.0016547 | 5 | Abcc1    |
| -0.395200345 | 1 | 0.0016548 | 5 | Lasp1    |
| 1.497940082  | 1 | 0.0016551 | 5 | Plac8    |
| 0.504352357  | 1 | 0.0016589 | 5 | Rpl36    |
| 1.751016047  | 1 | 0.0016825 | 5 | Rogdi    |
| -0.751217023 | 1 | 0.0016862 | 5 | Tbc1d9b  |
| 0.606584877  | 1 | 0.0016891 | 5 | Sod1     |
| -0.456198877 | 1 | 0.0017097 | 5 | Osbpl8   |
| 0.754512381  | 1 | 0.0017183 | 5 | Atp11b   |
| 0.535327415  | 1 | 0.0017408 | 5 | Hnrnpc   |
| -0.883588477 | 1 | 0.0017444 | 5 | Atg7     |
| -0.369529051 | 1 | 0.0017581 | 5 | Stau1    |
| -0.366257621 | 1 | 0.0017898 | 5 | Klf4     |
| -0.294513173 | 1 | 0.0017959 | 5 | Ccdc23   |
| 0.351012352  | 1 | 0.0018112 | 5 | Pfdn5    |
| -0.364343513 | 1 | 0.0018257 | 5 | Grcc10   |
| -0.526269984 | 1 | 0.0018307 | 5 | Atraid   |
| -0.297926292 | 1 | 0.001856  | 5 | Ccp1     |
| -0.408189963 | 1 | 0.0018643 | 5 | Wdr91    |
| -0.351111216 | 1 | 0.0018672 | 5 | Kcnn4    |
| -0.361633174 | 1 | 0.0018787 | 5 | Zbtb7a   |
| -0.299630095 | 1 | 0.0019201 | 5 | Nap1l4   |
| -1.203032582 | 1 | 0.0019279 | 5 | Hes1     |
| 0.555100467  | 1 | 0.0019479 | 5 | Fmn1     |
| -0.710856368 | 1 | 0.0019534 | 5 | Tmem223  |
| -1.218511167 | 1 | 0.0019653 | 5 | Fmn13    |
| -0.33545956  | 1 | 0.0020092 | 5 | Apoa1bp  |
| -0.48953225  | 1 | 0.0020382 | 5 | Psm1     |
| -0.665251548 | 1 | 0.0020614 | 5 | Ndufa9   |
| 0.589412798  | 1 | 0.0020646 | 5 | Cnn2     |
| -0.86410027  | 1 | 0.0020794 | 5 | Pcbd2    |
| -0.440743452 | 1 | 0.0021228 | 5 | Atp2a2   |
| -0.964561988 | 1 | 0.0021251 | 5 | Tgfb1    |
| -1.216286265 | 1 | 0.002138  | 5 | Kcnk13   |
| -1.105346096 | 1 | 0.0021395 | 5 | Rsd2     |
| 0.698706747  | 1 | 0.0021703 | 5 | Etv6     |
| -0.30662056  | 1 | 0.0021705 | 5 | Manf     |
| 0.260294458  | 1 | 0.0021793 | 5 | Sumo1    |
| -0.437359724 | 1 | 0.0021805 | 5 | Psen2    |
| -0.565757673 | 1 | 0.0021862 | 5 | Med10    |
| -0.563971833 | 1 | 0.0022141 | 5 | Mgea5    |
| -0.260683229 | 1 | 0.0022165 | 5 | Peli1    |
| -0.474746159 | 1 | 0.00222   | 5 | Jmjd6    |

|              |   |           |   |               |        |
|--------------|---|-----------|---|---------------|--------|
| 0.478276647  | 1 | 0.0022343 | 5 | Arpp19        |        |
| -0.91274685  | 1 | 0.0022364 | 5 | Topors        |        |
| -0.526980969 | 1 | 0.0022731 | 5 | Errfi1        |        |
| -1.490847303 | 1 | 0.0022742 | 5 | Gpx3          |        |
| -0.985078522 | 1 | 0.0022863 | 5 | Slc35e4       |        |
| 0.388410909  | 1 | 0.002313  | 5 | Eif2s2        |        |
| -1.27192721  | 1 | 0.002329  | 5 | Gbp7          |        |
| -0.928840069 | 1 | 0.0023493 | 5 | Cdr2          |        |
| -0.814944708 | 1 | 0.0023564 | 5 | Slc25a46      |        |
| -0.359897378 | 1 | 0.0023618 | 5 | Tnfaip8l2     |        |
| -0.309022784 | 1 | 0.0023863 | 5 | Tuba1c        |        |
| -1.271112289 | 1 | 0.0024169 | 5 | Agpat2        |        |
| -0.320765789 | 1 | 0.0024317 | 5 | Rab1          |        |
| 1.041204778  | 1 | 0.0025023 | 5 | Trim11        |        |
| -0.667071703 | 1 | 0.0025066 | 5 | Mob2          |        |
| 0.644819279  | 1 | 0.0025223 | 5 | Mir684-1      |        |
| -0.375979575 | 1 | 0.0025838 | 5 | Tmx1          |        |
| -0.398745545 | 1 | 0.0025854 | 5 | Rbm47         |        |
| -0.873359862 | 1 | 0.0025923 | 5 | Cpsf1         |        |
| -0.545173908 | 1 | 0.0025976 | 5 | Wasf2         |        |
| -0.554753965 | 1 | 0.0025994 | 5 | Dpm2          |        |
| -0.343745196 | 1 | 0.0026275 | 5 | Casp1         |        |
| -0.722004479 | 1 | 0.0026369 | 5 | Nfam1         |        |
| 0.929930959  | 1 | 0.0026507 | 5 | 2810008D09Rik |        |
| -0.652108665 | 1 | 0.0026724 | 5 | Cnot8         |        |
| -0.29322768  | 1 | 0.0027468 | 5 | Spcs1         |        |
| -0.876181766 | 1 | 0.0027538 | 5 | Extl3         |        |
| -0.693977745 | 1 | 0.0028076 | 5 | B3gnt2        |        |
| 0.940090152  | 1 | 0.0028092 | 5 | Phlpp1        |        |
| -0.353150454 | 1 | 0.0028413 | 5 |               | Mar.02 |
| -0.548179246 | 1 | 0.0028439 | 5 | Rraga         |        |
| -0.301460802 | 1 | 0.0028503 | 5 | Akap8l        |        |
| -0.838010539 | 1 | 0.0028592 | 5 | Arhgef12      |        |
| -0.506760578 | 1 | 0.0028695 | 5 | Lcp2          |        |
| 1.09054527   | 1 | 0.0028798 | 5 | Ms4a4c        |        |
| -0.983595981 | 1 | 0.0028821 | 5 | Cant1         |        |
| 0.803284533  | 1 | 0.0029174 | 5 | Slc38a1       |        |
| 0.963770701  | 1 | 0.0029537 | 5 | Bri3bp        |        |
| -0.751239494 | 1 | 0.0029643 | 5 | Agpat5        |        |
| -0.762885219 | 1 | 0.0029737 | 5 | Tnfrsf11a     |        |
| -1.105840892 | 1 | 0.0030038 | 5 | Vps13c        |        |
| -0.515545799 | 1 | 0.0030318 | 5 | Cav2          |        |
| -0.774144593 | 1 | 0.0030483 | 5 | Calu          |        |
| -0.704458272 | 1 | 0.0030642 | 5 | Dmxl2         |        |
| -0.861236058 | 1 | 0.0030848 | 5 | Fam160b1      |        |
| 0.549587342  | 1 | 0.0031085 | 5 | Gm15421       |        |
| -0.2592313   | 1 | 0.003134  | 5 | Mknk1         |        |
| -0.532427859 | 1 | 0.0031384 | 5 | Rtcb          |        |
| -0.376466897 | 1 | 0.0031675 | 5 | Fermt3        |        |
| -0.472993782 | 1 | 0.0031817 | 5 | Ifi203        |        |
| 0.453447576  | 1 | 0.003199  | 5 | Tmem161b      |        |
| -0.283833032 | 1 | 0.0032095 | 5 | Dgkz          |        |
| -1.280969137 | 1 | 0.0032233 | 5 | Nr1h3         |        |
| -0.370269674 | 1 | 0.0032803 | 5 | Eid1          |        |
| -0.413766705 | 1 | 0.0033266 | 5 | Fnbp1l        |        |
| -0.40421189  | 1 | 0.0033284 | 5 | Sec24b        |        |
| -0.729262666 | 1 | 0.0034062 | 5 | Ccdc132       |        |
| -0.402802242 | 1 | 0.0034309 | 5 | Rap1gds1      |        |
| -0.560463819 | 1 | 0.003432  | 5 | Dtx4          |        |
| -1.09036639  | 1 | 0.0034603 | 5 | Spn           |        |
| 0.795814429  | 1 | 0.0034661 | 5 | Fgfr1op       |        |

|              |   |           |   |             |
|--------------|---|-----------|---|-------------|
| -0.922189237 | 1 | 0.0034692 | 5 | Ckap5       |
| -0.355777776 | 1 | 0.0034713 | 5 | Nudc        |
| -0.422296407 | 1 | 0.003487  | 5 | Slc39a10    |
| -0.875136197 | 1 | 0.0035024 | 5 | Fhl3        |
| 0.742737013  | 1 | 0.0035106 | 5 | Wdfy4       |
| -0.515021125 | 1 | 0.0035333 | 5 | Gapvd1      |
| -0.657034097 | 1 | 0.0035432 | 5 | Dhrs7       |
| 1.094975604  | 1 | 0.0035556 | 5 | Uap1        |
| 0.856981564  | 1 | 0.0035601 | 5 | Rusc1       |
| -0.777047573 | 1 | 0.0035909 | 5 | Evi5        |
| -0.890459322 | 1 | 0.0036108 | 5 | Abhd4       |
| -0.319874051 | 1 | 0.0036167 | 5 | Alkbh5      |
| -0.546514939 | 1 | 0.0036237 | 5 | Lamtor3     |
| -0.426430895 | 1 | 0.003645  | 5 | Lman2       |
| -0.311483772 | 1 | 0.0036505 | 5 | Fam120b     |
| -0.71632122  | 1 | 0.0036648 | 5 | Spp1        |
| -0.846908203 | 1 | 0.0036668 | 5 | Lars        |
| -0.389646576 | 1 | 0.0037311 | 5 | Wbp5        |
| -0.803847538 | 1 | 0.0037452 | 5 | Socs6       |
| -0.444618386 | 1 | 0.0037663 | 5 | Ptov1       |
| -1.217827359 | 1 | 0.0037824 | 5 | Sqrdl       |
| -0.435155737 | 1 | 0.0037994 | 5 | D19Bwg1357e |
| 0.706453884  | 1 | 0.003814  | 5 | H2-DMb1     |
| -0.617992024 | 1 | 0.0038208 | 5 | Pisd        |
| -1.380806367 | 1 | 0.003827  | 5 | Dok2        |
| -0.351931492 | 1 | 0.0038394 | 5 | Cln5        |
| -0.285767385 | 1 | 0.0038691 | 5 | St6galnac4  |
| 1.17043282   | 1 | 0.0038724 | 5 | Irf4        |
| 0.660937736  | 1 | 0.0038728 | 5 | Arl2bp      |
| 1.112598933  | 1 | 0.003903  | 5 | Ppie        |
| -0.738228029 | 1 | 0.0039604 | 5 | Msrb1       |
| -0.480062212 | 1 | 0.0039744 | 5 | Fam63b      |
| -1.040352293 | 1 | 0.0039909 | 5 | Slc7a8      |
| -0.46806709  | 1 | 0.0040405 | 5 | Tubb2a      |
| -0.508577751 | 1 | 0.0040571 | 5 | Drg1        |
| -0.369447849 | 1 | 0.0040734 | 5 | Dync1h1     |
| 0.434742793  | 1 | 0.0041183 | 5 | Nubp2       |
| -0.443307685 | 1 | 0.0041849 | 5 | Ubap1       |
| -0.255055295 | 1 | 0.0041979 | 5 | Romo1       |
| -0.288923097 | 1 | 0.0042141 | 5 | Znfx1       |
| -0.894892391 | 1 | 0.0042924 | 5 | Cklf        |
| -0.739803453 | 1 | 0.0043111 | 5 | Mrpl28      |
| -0.276293344 | 1 | 0.0043917 | 5 | Plekho2     |
| -0.733552646 | 1 | 0.0043936 | 5 | Tbk1        |
| -0.392162156 | 1 | 0.0044342 | 5 | Mtpn        |
| -0.621777922 | 1 | 0.0044403 | 5 | Itpripl1    |
| -0.729271894 | 1 | 0.004451  | 5 | Mmp12       |
| -0.374910185 | 1 | 0.0044612 | 5 | Lpxn        |
| -0.29845102  | 1 | 0.004463  | 5 | Rabep1      |
| -0.540868939 | 1 | 0.0044695 | 5 | Rars        |
| -0.336396834 | 1 | 0.0044878 | 5 | Rbms1       |
| -0.456707245 | 1 | 0.0045402 | 5 | Tmem55b     |
| -0.335953727 | 1 | 0.0045556 | 5 | Ankhd1      |
| -0.310930827 | 1 | 0.0045729 | 5 | Zfr         |
| -0.498155842 | 1 | 0.004582  | 5 | Smim15      |
| -0.367487421 | 1 | 0.0045858 | 5 | Adrbk1      |
| -0.313652634 | 1 | 0.0046004 | 5 | Pfkfb3      |
| -0.266146285 | 1 | 0.0046281 | 5 | Prdx1       |
| -0.356924224 | 1 | 0.0047064 | 5 | Plcl2       |
| -0.646769498 | 1 | 0.0047262 | 5 | Ints1       |
| -0.946222277 | 1 | 0.0047315 | 5 | Nt5dc2      |

|              |   |           |   |            |
|--------------|---|-----------|---|------------|
| 0.872004676  | 1 | 0.0048059 | 5 | Vrk1       |
| -0.856304123 | 1 | 0.0048505 | 5 | Arfrp1     |
| -1.015027158 | 1 | 0.0048978 | 5 | Smim20     |
| 0.307803744  | 1 | 0.0049112 | 5 | Prcp       |
| 0.914264389  | 1 | 0.0049775 | 5 | Map4k4     |
| -0.323932569 | 1 | 0.0050062 | 5 | Gpr137b-ps |
| 0.590074072  | 1 | 0.0050338 | 5 | Cox17      |
| -0.36448843  | 1 | 0.0050437 | 5 | Brpf1      |
| -1.631235218 | 1 | 0.0051227 | 5 | Cp         |
| -0.361900909 | 1 | 0.005129  | 5 | Atp6v1d    |
| -0.856840968 | 1 | 0.0051406 | 5 | Sord       |
| -0.607256445 | 1 | 0.0051489 | 5 | Sh3bp2     |
| 0.481051598  | 1 | 0.005151  | 5 | Ndufa6     |
| -0.314824812 | 1 | 0.0052096 | 5 | Ptprij     |
| -0.671825578 | 1 | 0.0052569 | 5 | Naip2      |
| -0.943810816 | 1 | 0.005261  | 5 | Heatr5a    |
| -0.57542288  | 1 | 0.0052931 | 5 | Cln3       |
| -0.332219024 | 1 | 0.0053905 | 5 | Samd9l     |
| 0.284424107  | 1 | 0.0054227 | 5 | Sugt1      |
| -0.748337831 | 1 | 0.0054333 | 5 | Nfxl1      |
| 0.408310213  | 1 | 0.0054343 | 5 | Dazap2     |
| -0.848301207 | 1 | 0.0054378 | 5 | Srm        |
| -0.498286563 | 1 | 0.0055333 | 5 | Gda        |
| -0.262592601 | 1 | 0.0055403 | 5 | Ddx21      |
| -0.870205423 | 1 | 0.005546  | 5 | Ube4b      |
| -0.796421313 | 1 | 0.0055702 | 5 | Fnta       |
| -0.253788309 | 1 | 0.0055958 | 5 | Fes        |
| -0.260107131 | 1 | 0.0056563 | 5 | Arl6ip1    |
| -0.463226788 | 1 | 0.0057261 | 5 | Mad2l2     |
| 0.787395073  | 1 | 0.0057657 | 5 | Cdkn1b     |
| -0.648735294 | 1 | 0.0057709 | 5 | Emc1       |
| -0.669404998 | 1 | 0.0057735 | 5 | Ptpn7      |
| -0.752330431 | 1 | 0.0058283 | 5 | Tbc1d14    |
| -0.646535492 | 1 | 0.0058713 | 5 | Fech       |
| 0.698444837  | 1 | 0.0059016 | 5 | Cpne2      |
| -0.669491323 | 1 | 0.005958  | 5 | Irf3       |
| -0.487233857 | 1 | 0.0059793 | 5 | Acsl1      |
| -0.534866677 | 1 | 0.0059845 | 5 | Pla2g16    |
| -0.250771415 | 1 | 0.0060376 | 5 | Ahsa1      |
| -0.695268568 | 1 | 0.0061131 | 5 | Bfar       |
| -0.341709793 | 1 | 0.0061213 | 5 | Nkap       |
| -0.266553283 | 1 | 0.0061298 | 5 | Bscl2      |
| -0.346534219 | 1 | 0.0061682 | 5 | Znhit1     |
| -1.205368526 | 1 | 0.0062131 | 5 | Slc38a6    |
| 1.150159401  | 1 | 0.0063309 | 5 | Itpr1      |
| -0.254359996 | 1 | 0.0063497 | 5 | Suco       |
| -1.465480922 | 1 | 0.0063965 | 5 | Il10       |
| 0.700511578  | 1 | 0.006414  | 5 | Smg5       |
| -0.3619125   | 1 | 0.006424  | 5 | Arhgap5    |
| -0.613135998 | 1 | 0.0064402 | 5 | Sipa1      |
| 0.802551931  | 1 | 0.0064416 | 5 | Eif4a2     |
| -0.903593515 | 1 | 0.0064703 | 5 | Slc39a11   |
| 0.512129665  | 1 | 0.0064791 | 5 | Selplg     |
| -0.379029937 | 1 | 0.0065254 | 5 | Gtf2i      |
| -0.702406915 | 1 | 0.0065593 | 5 | Sbf2       |
| 0.371999603  | 1 | 0.0065942 | 5 | Cox6c      |
| 0.985981516  | 1 | 0.006612  | 5 | Utp18      |
| -0.875041673 | 1 | 0.0066123 | 5 | Ncoa2      |
| -0.750840918 | 1 | 0.0067386 | 5 | Gclm       |
| -0.333510068 | 1 | 0.0067713 | 5 | Osm        |
| -1.023228014 | 1 | 0.0067849 | 5 | Rnf128     |

|              |   |           |   |               |
|--------------|---|-----------|---|---------------|
| -0.321430338 | 1 | 0.0068594 | 5 | Tcirg1        |
| -0.498569503 | 1 | 0.0068971 | 5 | Chmp2b        |
| -0.595211128 | 1 | 0.0069838 | 5 | Plekha3       |
| -0.503862595 | 1 | 0.0070057 | 5 | Cd72          |
| -0.324374467 | 1 | 0.0070395 | 5 | 2810004N23Rik |
| -0.306587071 | 1 | 0.0071031 | 5 | Otulin        |
| -1.42266004  | 1 | 0.0071122 | 5 | Lyl1          |
| -0.626390567 | 1 | 0.0071322 | 5 | Lemd2         |
| -0.311144035 | 1 | 0.0071826 | 5 | Ppm1g         |
| 0.766631887  | 1 | 0.0072799 | 5 | Aebp2         |
| 1.024568086  | 1 | 0.0072996 | 5 | Rbm38         |
| -0.339649346 | 1 | 0.0073162 | 5 | Nipbl         |
| -1.17376595  | 1 | 0.0073285 | 5 | Zfp704        |
| -0.259741023 | 1 | 0.007333  | 5 | Eftud2        |
| 0.509708403  | 1 | 0.0073442 | 5 | Rpl38         |
| -0.903090677 | 1 | 0.0073822 | 5 | Enox2         |
| -0.449053744 | 1 | 0.0073882 | 5 | Ggh           |
| 1.024236851  | 1 | 0.0074572 | 5 | Rfxap         |
| -0.341900492 | 1 | 0.0074758 | 5 | Arrb2         |
| -0.256435805 | 1 | 0.0075406 | 5 | Fam129b       |
| -1.139190846 | 1 | 0.0075702 | 5 | Fam213b       |
| -0.277275162 | 1 | 0.0075846 | 5 | Abcg1         |
| -1.131403407 | 1 | 0.0075966 | 5 | Msl3          |
| -0.431264257 | 1 | 0.0076416 | 5 | Commdd9       |
| 0.334678591  | 1 | 0.0076897 | 5 | Uqcrh         |
| -0.259388694 | 1 | 0.0077187 | 5 | Myo9b         |
| -0.428715017 | 1 | 0.0077309 | 5 | Mgat2         |
| -0.338600405 | 1 | 0.0077467 | 5 | Tfe3          |
| 0.776532535  | 1 | 0.0077729 | 5 | Mllt6         |
| -0.279058858 | 1 | 0.0078658 | 5 | Mrpl42        |
| -0.298467502 | 1 | 0.0078684 | 5 | Mapkap1       |
| 0.850845529  | 1 | 0.0080518 | 5 | Fyn           |
| -0.629824958 | 1 | 0.0080555 | 5 | Adi1          |
| -0.735698375 | 1 | 0.0080645 | 5 | Tpcn1         |
| -0.944456112 | 1 | 0.0080707 | 5 | Inpp5k        |
| -0.34802624  | 1 | 0.0080824 | 5 | 2210016F16Rik |
| -0.520123419 | 1 | 0.0081272 | 5 | Mrpl48        |
| -0.949310237 | 1 | 0.0081733 | 5 | Msra          |
| -0.581886823 | 1 | 0.0082564 | 5 | Gxylt1        |
| -1.041524489 | 1 | 0.0082939 | 5 | 2510009E07Rik |
| 0.458123535  | 1 | 0.0083213 | 5 | Basp1         |
| -0.489860264 | 1 | 0.0084064 | 5 | Rps19bp1      |
| -0.693033886 | 1 | 0.0084212 | 5 | Usp5          |
| -0.300968167 | 1 | 0.0084848 | 5 | Ralgapb       |
| -0.745014768 | 1 | 0.0085636 | 5 | 1110057K04Rik |
| -0.323267726 | 1 | 0.00857   | 5 | Fxyd2         |
| -1.030656157 | 1 | 0.0086613 | 5 | Tm7sf3        |
| 0.378276972  | 1 | 0.0086636 | 5 | Tpm4          |
| -0.403585196 | 1 | 0.0086872 | 5 | Ids           |
| -0.455949148 | 1 | 0.0087299 | 5 | Slc48a1       |
| 0.318276657  | 1 | 0.0087559 | 5 | Pim1          |
| 0.675211843  | 1 | 0.0088325 | 5 | Agpat4        |
| -0.369435966 | 1 | 0.008852  | 5 | Ralb          |
| -0.625071284 | 1 | 0.0088593 | 5 | Ptpmt1        |
| 0.809554458  | 1 | 0.0088731 | 5 | Sin3a         |
| 0.981434623  | 1 | 0.0088999 | 5 | Ccser2        |
| -0.345671051 | 1 | 0.0089276 | 5 | Parp14        |
| -0.318238917 | 1 | 0.0089618 | 5 | Dynll2        |
| 0.622899422  | 1 | 0.0089914 | 5 | Tmem131       |
| -0.612443871 | 1 | 0.0090001 | 5 | Tmem242       |
| -0.626644213 | 1 | 0.0090162 | 5 | Pmm2          |

|              |          |           |   |               |        |
|--------------|----------|-----------|---|---------------|--------|
| 0.698612996  | 1        | 0.0091224 | 5 | Smchd1        |        |
| -0.7134104   | 1        | 0.0091565 | 5 | Snapin        |        |
| -0.562133395 | 1        | 0.0091643 | 5 | Nus1          |        |
| -0.319116425 | 1        | 0.0092024 | 5 | Napg          |        |
| -0.272869255 | 1        | 0.0093125 | 5 | Vapa          |        |
| -0.267219949 | 1        | 0.0093625 | 5 | Cd164         |        |
| -0.766693564 | 1        | 0.0093699 | 5 | Dnajc4        |        |
| -0.925938821 | 1        | 0.0093944 | 5 | Ilkap         |        |
| -0.943463454 | 1        | 0.009397  | 5 |               | Sep.08 |
| -0.500093459 | 1        | 0.0093993 | 5 | Tmem120a      |        |
| 0.548063206  | 1        | 0.0094012 | 5 | Uvrag         |        |
| -0.472073527 | 1        | 0.0094038 | 5 | Spns1         |        |
| 0.287390474  | 1        | 0.0094684 | 5 | Cmip          |        |
| -0.301314509 | 1        | 0.0095071 | 5 | Ggnbp2        |        |
| -0.439025471 | 1        | 0.0095324 | 5 | Parvb         |        |
| -0.29976581  | 1        | 0.0095387 | 5 | Fam168a       |        |
| -0.480771477 | 1        | 0.0095413 | 5 | Arhgef2       |        |
| -0.657193204 | 1        | 0.0095781 | 5 | Agtrap        |        |
| -1.135614909 | 1        | 0.00958   | 5 | Ttyh2         |        |
| -0.458511991 | 1        | 0.009587  | 5 | Tm2d3         |        |
| -0.253973414 | 1        | 0.0095993 | 5 | 2210013O21Rik |        |
| 0.550110106  | 1        | 0.0096134 | 5 | Taf10         |        |
| 0.474248459  | 1        | 0.0096382 | 5 | Psma7         |        |
| -0.362896909 | 1        | 0.0096752 | 5 | Srgap2        |        |
| -0.991248842 | 1        | 0.0096774 | 5 | Il18bp        |        |
| -0.381006709 | 1        | 0.0096885 | 5 | Med8          |        |
| -0.630946384 | 1        | 0.0096948 | 5 | Srpr          |        |
| -0.276188274 | 1        | 0.0097369 | 5 | Rpl7l1        |        |
| 0.622566296  | 1        | 0.00974   | 5 | Prdx6         |        |
| -0.621376933 | 1        | 0.0098245 | 5 | Hbegf         |        |
| 1.463843116  | 1        | 0.0098707 | 5 | Serpinb9      |        |
| -0.502958041 | 1        | 0.0099918 | 5 | Strn4         |        |
| 2.030581647  | 1.09E-40 | 8.18E-45  | 6 | Klrc1         |        |
| 2.694960433  | 7.27E-31 | 5.44E-35  | 6 | Cd3e          |        |
| 3.35997087   | 1.01E-28 | 7.53E-33  | 6 | Cd3g          |        |
| 2.642595667  | 7.41E-26 | 5.55E-30  | 6 | Ptprcap       |        |
| 2.49453385   | 6.05E-25 | 4.53E-29  | 6 | Gata3         |        |
| 3.100310605  | 7.57E-25 | 5.67E-29  | 6 | Cd96          |        |
| 2.862403485  | 5.26E-24 | 3.94E-28  | 6 | Itk           |        |
| 2.786529187  | 5.35E-24 | 4.01E-28  | 6 | Fasl          |        |
| 1.872914424  | 7.87E-24 | 5.90E-28  | 6 | Bcl11b        |        |
| 2.172726167  | 1.93E-23 | 1.45E-27  | 6 | Gimap3        |        |
| 2.63386361   | 3.05E-23 | 2.29E-27  | 6 |               | Sep.01 |
| 2.470757751  | 4.06E-21 | 3.04E-25  | 6 | Klre1         |        |
| 2.055125118  | 2.98E-19 | 2.23E-23  | 6 | Ikzf3         |        |
| 2.751684564  | 6.17E-19 | 4.62E-23  | 6 | Ms4a4b        |        |
| 2.856070665  | 1.69E-18 | 1.27E-22  | 6 | Cd247         |        |
| 3.229915294  | 2.62E-18 | 1.96E-22  | 6 | Cd3d          |        |
| 2.954288682  | 2.71E-17 | 2.03E-21  | 6 | Sh2d2a        |        |
| 2.311410219  | 2.72E-17 | 2.04E-21  | 6 | Skap1         |        |
| 2.074984821  | 8.13E-17 | 6.09E-21  | 6 | Ets1          |        |
| 3.144490941  | 2.20E-16 | 1.65E-20  | 6 | Lat           |        |
| 2.376754827  | 1.59E-15 | 1.19E-19  | 6 | Xcl1          |        |
| 2.651876072  | 2.57E-15 | 1.93E-19  | 6 | Gimap4        |        |
| 2.421922008  | 2.74E-15 | 2.05E-19  | 6 | Lck           |        |
| 2.246544251  | 1.32E-13 | 9.92E-18  | 6 | Ifng          |        |
| 1.860891452  | 2.69E-13 | 2.01E-17  | 6 | Acap1         |        |
| 1.619796947  | 2.81E-13 | 2.10E-17  | 6 | Clnk          |        |
| 1.771904845  | 7.51E-13 | 5.62E-17  | 6 | Faah          |        |
| 2.811666212  | 1.53E-11 | 1.14E-15  | 6 | Il2rb         |        |
| 1.416841343  | 2.27E-11 | 1.70E-15  | 6 | Ltb           |        |

|              |             |          |   |            |
|--------------|-------------|----------|---|------------|
| 2.670382995  | 3.95E-11    | 2.96E-15 | 6 | Cd8a       |
| 2.880247093  | 4.08E-11    | 3.06E-15 | 6 | Icos       |
| 2.293829638  | 5.83E-11    | 4.36E-15 | 6 | Actn2      |
| 2.900505758  | 1.06E-10    | 7.97E-15 | 6 | Thy1       |
| 2.841790965  | 6.32E-10    | 4.74E-14 | 6 | Ctsw       |
| 2.074203635  | 1.94E-09    | 1.45E-13 | 6 | Ppp1r16b   |
| 2.225982458  | 1.97E-09    | 1.47E-13 | 6 | Ablim1     |
| -0.735161222 | 3.77E-09    | 2.82E-13 | 6 | Ftl1       |
| 0.785863672  | 5.14E-09    | 3.85E-13 | 6 | Tmsb10     |
| 2.975413515  | 7.78E-09    | 5.83E-13 | 6 | Gzmb       |
| -0.885313182 | 8.36E-09    | 6.26E-13 | 6 | Ctss       |
| 1.855781051  | 8.88E-09    | 6.65E-13 | 6 | Ikzf2      |
| -1.544649932 | 1.25E-08    | 9.40E-13 | 6 | Tgfb1      |
| 3.141747981  | 1.30E-08    | 9.74E-13 | 6 | Nkg7       |
| 2.565541038  | 2.44E-08    | 1.83E-12 | 6 | Pdcd1      |
| -1.481660382 | 4.83E-08    | 3.61E-12 | 6 | Pltp       |
| 2.647850982  | 5.25E-08    | 3.94E-12 | 6 | Cxcr6      |
| -0.743744726 | 2.14E-07    | 1.60E-11 | 6 | Ctsb       |
| -1.272091013 | 2.76E-07    | 2.07E-11 | 6 | Ctsh       |
| 1.661489559  | 3.82E-07    | 2.86E-11 | 6 | Pkp3       |
| -1.32557845  | 4.49E-07    | 3.37E-11 | 6 | Lamp2      |
| 2.463269228  | 5.72E-07    | 4.28E-11 | 6 | Ccl5       |
| 1.283047891  | 5.79E-07    | 4.34E-11 | 6 | Cd82       |
| -1.086870716 | 7.24E-07    | 5.42E-11 | 6 | Cd68       |
| 2.150005505  | 1.36E-06    | 1.02E-10 | 6 | Ptpn22     |
| 2.013542227  | 1.99E-06    | 1.49E-10 | 6 | AW112010   |
| 2.138055852  | 2.35E-06    | 1.76E-10 | 6 | Gramd3     |
| 2.120311878  | 2.52E-06    | 1.89E-10 | 6 | Zap70      |
| 1.807303338  | 3.22E-06    | 2.41E-10 | 6 | F2r        |
| -0.907366186 | 4.65E-06    | 3.48E-10 | 6 | Ctsz       |
| -1.001639665 | 9.31E-06    | 6.97E-10 | 6 | Lilrb4     |
| -1.083071657 | 1.08E-05    | 8.07E-10 | 6 | Hexa       |
| -0.869004567 | 1.39E-05    | 1.04E-09 | 6 | Lyz2       |
| 2.292690876  | 1.54E-05    | 1.15E-09 | 6 | Ctla2a     |
| 2.145928427  | 1.90E-05    | 1.42E-09 | 6 | Camk4      |
| 1.589220038  | 2.27E-05    | 1.70E-09 | 6 | Kif21b     |
| 0.459177862  | 2.47E-05    | 1.85E-09 | 6 | Rps15a-ps4 |
| -0.81922866  | 2.85E-05    | 2.14E-09 | 6 | Cst3       |
| -1.028036392 | 3.80E-05    | 2.85E-09 | 6 | C1qa       |
| -1.189803228 | 3.93E-05    | 2.94E-09 | 6 | Cd63       |
| -1.066632049 | 5.54E-05    | 4.15E-09 | 6 | Wfdc17     |
| 2.285520881  | 5.95E-05    | 4.46E-09 | 6 | Tbc1d10c   |
| -0.863277095 | 7.36E-05    | 5.51E-09 | 6 | Cybb       |
| -1.60527207  | 7.81E-05    | 5.85E-09 | 6 | Nrros      |
| -0.787833415 | 8.67E-05    | 6.49E-09 | 6 | C1qb       |
| -1.272779133 | 0.000114105 | 8.55E-09 | 6 | Basp1      |
| -1.111713431 | 0.000125493 | 9.40E-09 | 6 | Cxcl16     |
| -0.879381247 | 0.000131387 | 9.84E-09 | 6 | Ctsa       |
| 1.530175097  | 0.000158419 | 1.19E-08 | 6 | P2ry10     |
| 0.571975736  | 0.000162631 | 1.22E-08 | 6 | H2-K1      |
| -1.488338771 | 0.000199643 | 1.50E-08 | 6 | Ifi30      |
| -1.354400997 | 0.000242298 | 1.81E-08 | 6 | Emr1       |
| -1.143760013 | 0.000261258 | 1.96E-08 | 6 | Ifitm2     |
| -0.9932566   | 0.000273808 | 2.05E-08 | 6 | Alox5ap    |
| -0.708685305 | 0.000301571 | 2.26E-08 | 6 | Tyrobp     |
| -0.839670545 | 0.000379741 | 2.84E-08 | 6 | Grn        |
| 2.004154065  | 0.000474292 | 3.55E-08 | 6 | Cd2        |
| -1.856384265 | 0.000481627 | 3.61E-08 | 6 | Slc11a1    |
| -1.059774107 | 0.000563534 | 4.22E-08 | 6 | App        |
| -1.707909957 | 0.000627902 | 4.70E-08 | 6 | Tlr2       |
| -1.036914023 | 0.00065498  | 4.91E-08 | 6 | Sdc3       |



|                     |                    |                 |          |               |
|---------------------|--------------------|-----------------|----------|---------------|
| -1.041363242        | 0.000722255        | 5.41E-08        | 6        | Mpeg1         |
| 1.832381014         | 0.000731135        | 5.48E-08        | 6        | Lax1          |
| -1.031559801        | 0.000799816        | 5.99E-08        | 6        | Atp6v0b       |
| <b>-0.971176513</b> | <b>0.000815887</b> | <b>6.11E-08</b> | <b>6</b> | <b>Csf1r</b>  |
| 0.700253034         | 0.000821725        | 6.15E-08        | 6        | Gm6251        |
| -0.836759305        | 0.000847203        | 6.35E-08        | 6        | Anxa5         |
| -0.90213342         | 0.000911797        | 6.83E-08        | 6        | Cd14          |
| -1.459432185        | 0.000977504        | 7.32E-08        | 6        | Cndp2         |
| 1.05594449          | 0.00120163         | 9.00E-08        | 6        | Rasgrp1       |
| -1.09990862         | 0.001349046        | 1.01E-07        | 6        | Ms4a7         |
| -1.49251263         | 0.001810358        | 1.36E-07        | 6        | Pirb          |
| 1.715007837         | 0.001816544        | 1.36E-07        | 6        | Cd28          |
| 1.944653135         | 0.001837245        | 1.38E-07        | 6        | Ifi47         |
| -1.396808075        | 0.001841422        | 1.38E-07        | 6        | Mafb          |
| -0.755379389        | 0.002070501        | 1.55E-07        | 6        | Gp49a         |
| -1.019542817        | 0.002288997        | 1.71E-07        | 6        | Asah1         |
| -1.265667687        | 0.002483274        | 1.86E-07        | 6        | Ifitm3        |
| -1.621034215        | 0.002824721        | 2.12E-07        | 6        | H2-DMa        |
| -0.711731035        | 0.003034734        | 2.27E-07        | 6        | Lamp1         |
| -1.311192646        | 0.003659962        | 2.74E-07        | 6        | AF251705      |
| -0.862500338        | 0.004125437        | 3.09E-07        | 6        | Lgmn          |
| -0.87375168         | 0.005272538        | 3.95E-07        | 6        | Hexb          |
| -1.00738823         | 0.005311885        | 3.98E-07        | 6        | Gm2a          |
| -1.165609844        | 0.007371489        | 5.52E-07        | 6        | Trem2         |
| 0.903644178         | 0.007396476        | 5.54E-07        | 6        | Rac2          |
| -1.451124083        | 0.008403276        | 6.29E-07        | 6        | Dusp3         |
| 0.457052834         | 0.008934727        | 6.69E-07        | 6        | Rps4x         |
| -2.008689388        | 0.009059665        | 6.79E-07        | 6        | Glt25d1       |
| -2.046434569        | 0.009620674        | 7.21E-07        | 6        | Pilra         |
| -0.890035367        | 0.010008829        | 7.50E-07        | 6        | Psap          |
| -1.331560589        | 0.010459461        | 7.83E-07        | 6        | Gusb          |
| -1.246173946        | 0.010810533        | 8.10E-07        | 6        | Syk           |
| -1.014768443        | 0.011374621        | 8.52E-07        | 6        | Sirpa         |
| 0.496382083         | 0.012292413        | 9.21E-07        | 6        | Rps15         |
| -0.901981212        | 0.012298258        | 9.21E-07        | 6        | Cd83          |
| -0.734632329        | 0.014218158        | 1.06E-06        | 6        | C1qc          |
| -1.040796657        | 0.014280793        | 1.07E-06        | 6        | Spi1          |
| 0.483017202         | 0.015688538        | 1.17E-06        | 6        | Rps20         |
| -1.377208401        | 0.015796574        | 1.18E-06        | 6        | Sgpl1         |
| -1.08132177         | 0.018535771        | 1.39E-06        | 6        | Trf           |
| -1.808486182        | 0.020653942        | 1.55E-06        | 6        | Csf2rb        |
| 1.013355127         | 0.021546247        | 1.61E-06        | 6        | Osbpl3        |
| 0.616145732         | 0.021736164        | 1.63E-06        | 6        | Gm1821        |
| 2.372868304         | 0.023525992        | 1.76E-06        | 6        | Cd8b1         |
| -0.782705706        | 0.026033651        | 1.95E-06        | 6        | Ctsc          |
| 0.762000156         | 0.027390313        | 2.05E-06        | 6        | Sub1          |
| -0.726645185        | 0.030312649        | 2.27E-06        | 6        | Lgals3        |
| -1.025577318        | 0.036046315        | 2.70E-06        | 6        | Plekho2       |
| -1.383686165        | 0.036448607        | 2.73E-06        | 6        | Ctsl          |
| -0.980371622        | 0.037412311        | 2.80E-06        | 6        | Cstb          |
| -1.510336569        | 0.037576744        | 2.81E-06        | 6        | Ms4a6c        |
| -1.337865795        | 0.038109408        | 2.85E-06        | 6        | Cyfp1         |
| 1.324154553         | 0.040120153        | 3.00E-06        | 6        | Lbh           |
| -1.280886411        | 0.04092072         | 3.06E-06        | 6        | Cfp           |
| 0.490852769         | 0.042307878        | 3.17E-06        | 6        | Rpl13a        |
| -1.135942681        | 0.042448144        | 3.18E-06        | 6        | 5430435G22Rik |
| -0.573327715        | 0.047347828        | 3.55E-06        | 6        | Npc2          |
| -0.825537767        | 0.05732552         | 4.29E-06        | 6        | Atf3          |
| -1.015348525        | 0.057482019        | 4.31E-06        | 6        | Ctnna1        |
| -0.712153227        | 0.05751654         | 4.31E-06        | 6        | Akr1a1        |
| -1.478039728        | 0.058673215        | 4.39E-06        | 6        | Msr1          |

|              |             |          |   |               |
|--------------|-------------|----------|---|---------------|
| 0.452174203  | 0.06326308  | 4.74E-06 | 6 | Rps26         |
| -0.967589646 | 0.064525849 | 4.83E-06 | 6 | Timp2         |
| -1.426830322 | 0.065674176 | 4.92E-06 | 6 | Myof          |
| 2.946073074  | 0.072835703 | 5.46E-06 | 6 | Gzma          |
| -0.912068756 | 0.074562167 | 5.58E-06 | 6 | Abca1         |
| -0.653173621 | 0.075330269 | 5.64E-06 | 6 | Ctsd          |
| -0.795286347 | 0.083956642 | 6.29E-06 | 6 | Ly86          |
| -1.260276855 | 0.084839154 | 6.35E-06 | 6 | Ptpre         |
| 1.282152075  | 0.085061556 | 6.37E-06 | 6 | Rnf138        |
| 0.558503009  | 0.085648081 | 6.41E-06 | 6 | Rplp0         |
| 1.909940296  | 0.089013816 | 6.67E-06 | 6 | Gimap6        |
| 1.528623166  | 0.089914797 | 6.73E-06 | 6 | Pdcd4         |
| -0.853548293 | 0.091363766 | 6.84E-06 | 6 | Kctd12        |
| 1.054733627  | 0.095019482 | 7.12E-06 | 6 | Ogt           |
| -1.6159544   | 0.100478857 | 7.53E-06 | 6 | Fnip2         |
| 1.774065586  | 0.106323769 | 7.96E-06 | 6 | 1190002F15Rik |
| 1.835623479  | 0.108038306 | 8.09E-06 | 6 | Serpinb9      |
| 1.088037621  | 0.108781913 | 8.15E-06 | 6 | Hmgb2         |
| 0.683966671  | 0.111507927 | 8.35E-06 | 6 | Rabgap1l      |
| -1.138945586 | 0.116470599 | 8.72E-06 | 6 | Igf1          |
| 0.288616847  | 0.123505489 | 9.25E-06 | 6 | B2m           |
| -1.034160498 | 0.123792615 | 9.27E-06 | 6 | Ccl6          |
| 0.716709853  | 0.123883132 | 9.28E-06 | 6 | Btg1          |
| 1.868516442  | 0.125132692 | 9.37E-06 | 6 | Grap2         |
| -0.771222369 | 0.132614041 | 9.93E-06 | 6 | Mt1           |
| -0.36809319  | 0.13366738  | 1.00E-05 | 6 | Fth1          |
| -1.870874775 | 0.135491511 | 1.01E-05 | 6 | Il1rn         |
| -1.095504917 | 0.137335444 | 1.03E-05 | 6 | Ms4a6d        |
| -0.656070039 | 0.137816353 | 1.03E-05 | 6 | Fcgr3         |
| -0.920104266 | 0.152070667 | 1.14E-05 | 6 | Pea15a        |
| -0.665356171 | 0.15365845  | 1.15E-05 | 6 | Gabarap       |
| 1.169996934  | 0.162931748 | 1.22E-05 | 6 | Hcst          |
| -1.285904335 | 0.164871491 | 1.23E-05 | 6 | Mfsd1         |
| 1.242700678  | 0.168476746 | 1.26E-05 | 6 | Smad7         |
| 1.449994479  | 0.169219182 | 1.27E-05 | 6 | Dusp2         |
| -0.834463902 | 0.176105491 | 1.32E-05 | 6 | Got1          |
| 0.403028569  | 0.18226244  | 1.37E-05 | 6 | Mir682        |
| 1.48470309   | 0.18858306  | 1.41E-05 | 6 | 2700094K13Rik |
| -0.695324612 | 0.189337686 | 1.42E-05 | 6 | Sdcbp         |
| -0.91226117  | 0.190339073 | 1.43E-05 | 6 | H2-Eb1        |
| -0.811418591 | 0.194459822 | 1.46E-05 | 6 | Nceh1         |
| 0.662149332  | 0.207201707 | 1.55E-05 | 6 | Aes           |
| 0.624184135  | 0.211710226 | 1.59E-05 | 6 | Rps15a-ps6    |
| 1.050596546  | 0.218664129 | 1.64E-05 | 6 | Ccnd2         |
| -0.761087892 | 0.23716515  | 1.78E-05 | 6 | Sh3bgrl       |
| 1.673003197  | 0.238629251 | 1.79E-05 | 6 | Fam102a       |
| -1.191216627 | 0.243766476 | 1.83E-05 | 6 | Cd300ld       |
| 1.427382916  | 0.256504569 | 1.92E-05 | 6 | Dgat1         |
| 0.368614152  | 0.258570444 | 1.94E-05 | 6 | Rps5          |
| -1.073615381 | 0.264571373 | 1.98E-05 | 6 | Plekho1       |
| -0.867260101 | 0.265550372 | 1.99E-05 | 6 | H2-Aa         |
| 0.921744583  | 0.267608727 | 2.00E-05 | 6 | Map4k2        |
| -0.92159409  | 0.271849422 | 2.04E-05 | 6 | Mbnl2         |
| 1.173408969  | 0.275767716 | 2.07E-05 | 6 | Pdpf          |
| 2.520802073  | 0.283984997 | 2.13E-05 | 6 | Cd163l1       |
| 0.570539883  | 0.290027866 | 2.17E-05 | 6 | Rps18         |
| 0.454209331  | 0.29366718  | 2.20E-05 | 6 | Rpl4          |
| 1.543855059  | 0.293747746 | 2.20E-05 | 6 | Il18rap       |
| -1.482577777 | 0.294053208 | 2.20E-05 | 6 | Gnaq          |
| -0.829238663 | 0.30080618  | 2.25E-05 | 6 | H2-Ab1        |
| -1.109175746 | 0.30415365  | 2.28E-05 | 6 | Cers2         |

|              |             |          |   |          |
|--------------|-------------|----------|---|----------|
| -1.026197858 | 0.310404203 | 2.32E-05 | 6 | Aif1     |
| 1.466707261  | 0.323125063 | 2.42E-05 | 6 | Cd7      |
| 1.468646899  | 0.335885785 | 2.52E-05 | 6 | Dgka     |
| 0.563341588  | 0.346911154 | 2.60E-05 | 6 | Rps15a   |
| -1.526706515 | 0.347347072 | 2.60E-05 | 6 | Tbc1d9   |
| -1.404823574 | 0.351582816 | 2.63E-05 | 6 | Lst1     |
| -1.865107135 | 0.356439748 | 2.67E-05 | 6 | Gla      |
| -0.974262243 | 0.359361285 | 2.69E-05 | 6 | Atp6v1b2 |
| 0.37569789   | 0.368015101 | 2.76E-05 | 6 | Rpl32    |
| -0.421596807 | 0.368727224 | 2.76E-05 | 6 | Tpp1     |
| -0.791336327 | 0.373983828 | 2.80E-05 | 6 | Tpd52    |
| 1.078225519  | 0.37830574  | 2.83E-05 | 6 | Bcl2     |
| -1.25754295  | 0.378830613 | 2.84E-05 | 6 | S100a1   |
| -0.751446458 | 0.394923354 | 2.96E-05 | 6 | Marcks   |
| -0.709652926 | 0.401071002 | 3.00E-05 | 6 | Unc93b1  |
| -1.317350847 | 0.428961125 | 3.21E-05 | 6 | Ifngr2   |
| -0.924947212 | 0.431907437 | 3.23E-05 | 6 | Ninj1    |
| -1.195576111 | 0.452906922 | 3.39E-05 | 6 | Tmem106a |
| -1.088005711 | 0.463362974 | 3.47E-05 | 6 | Trim25   |
| 1.176712787  | 0.468420178 | 3.51E-05 | 6 | Mettl7a1 |
| -1.428903333 | 0.475619974 | 3.56E-05 | 6 | Clec7a   |
| 1.499220661  | 0.531675696 | 3.98E-05 | 6 | Fasn     |
| -1.215557009 | 0.53371134  | 4.00E-05 | 6 | Pla2g7   |
| -1.314078645 | 0.540949631 | 4.05E-05 | 6 | Anxa1    |
| -1.040734002 | 0.551340689 | 4.13E-05 | 6 | Slamf9   |
| 0.796339884  | 0.574258105 | 4.30E-05 | 6 | Rps16    |
| 0.657780103  | 0.577900273 | 4.33E-05 | 6 | Rpl18a   |
| -0.698939058 | 0.577901556 | 4.33E-05 | 6 | Metrl    |
| -0.68777191  | 0.585913164 | 4.39E-05 | 6 | Cxcl2    |
| -0.56980407  | 0.588921025 | 4.41E-05 | 6 | Atox1    |
| -0.847920247 | 0.630705405 | 4.72E-05 | 6 | Csf2ra   |
| -0.692774634 | 0.630784756 | 4.72E-05 | 6 | Plek     |
| -0.409934232 | 0.63288687  | 4.74E-05 | 6 | Gpx1     |
| -0.844829758 | 0.633256214 | 4.74E-05 | 6 | Tmed10   |
| 0.651400867  | 0.635669401 | 4.76E-05 | 6 | Npm1     |
| 1.024497441  | 0.640759924 | 4.80E-05 | 6 | Zfp3612  |
| 0.617062103  | 0.66211583  | 4.96E-05 | 6 | Mbnl1    |
| -1.244819584 | 0.664599766 | 4.98E-05 | 6 | Dnase2a  |
| -1.257387026 | 0.667244586 | 5.00E-05 | 6 | Skap2    |
| -0.687591587 | 0.688745856 | 5.16E-05 | 6 | C3ar1    |
| -1.297863866 | 0.705116011 | 5.28E-05 | 6 | Scarb2   |
| -1.204638633 | 0.709139159 | 5.31E-05 | 6 | Lpl      |
| -0.765384429 | 0.721665574 | 5.40E-05 | 6 | Lmna     |
| 0.78700084   | 0.732355207 | 5.48E-05 | 6 | Prkar1a  |
| -1.704457202 | 0.747780007 | 5.60E-05 | 6 | Nuak2    |
| 0.561657149  | 0.756098389 | 5.66E-05 | 6 | Gm4832   |
| -1.397034485 | 0.773982694 | 5.80E-05 | 6 | Pid1     |
| -0.926785354 | 0.815447636 | 6.11E-05 | 6 | Stab1    |
| -1.592156909 | 0.817937624 | 6.13E-05 | 6 | Cib1     |
| -1.047426393 | 0.840757885 | 6.30E-05 | 6 | Alcam    |
| -1.327239425 | 0.851105764 | 6.37E-05 | 6 | H2-DMb1  |
| 0.372733105  | 0.856582827 | 6.42E-05 | 6 | Pfn1     |
| -0.978791239 | 0.860812458 | 6.45E-05 | 6 | Rab3il1  |
| -0.731868554 | 0.869805226 | 6.51E-05 | 6 | Abhd12   |
| -1.561489279 | 0.944844285 | 7.08E-05 | 6 | Emilin2  |
| -0.859783773 | 0.972386823 | 7.28E-05 | 6 | Tnfrsf1a |
| -1.432080104 | 0.973745688 | 7.29E-05 | 6 | Tgm2     |
| 1.140592268  | 0.98216976  | 7.36E-05 | 6 | Itgal    |
| -0.68267668  | 1           | 7.62E-05 | 6 | Cd74     |
| 1.176630858  | 1           | 7.62E-05 | 6 | Snrpf    |
| -0.750290688 | 1           | 7.67E-05 | 6 | Al607873 |

|              |   |           |   |           |
|--------------|---|-----------|---|-----------|
| -1.204088323 | 1 | 7.73E-05  | 6 | Rbpj      |
| -1.066609924 | 1 | 7.91E-05  | 6 | Ncf1      |
| 0.708054694  | 1 | 7.99E-05  | 6 | Snrpg     |
| 0.862991136  | 1 | 8.40E-05  | 6 | Selplg    |
| -1.449740151 | 1 | 8.41E-05  | 6 | Acer3     |
| 1.739354853  | 1 | 8.52E-05  | 6 | Lime1     |
| 0.618956478  | 1 | 8.54E-05  | 6 | Coro1a    |
| -1.194977076 | 1 | 8.63E-05  | 6 | Gsn       |
| 0.548199448  | 1 | 8.70E-05  | 6 | Cd52      |
| -0.592096565 | 1 | 8.94E-05  | 6 | Scpep1    |
| -0.73864879  | 1 | 9.15E-05  | 6 | Dab2      |
| -0.863407816 | 1 | 9.29E-05  | 6 | Nckap1l   |
| -0.825021274 | 1 | 9.39E-05  | 6 | Hsd17b11  |
| -0.600985308 | 1 | 9.45E-05  | 6 | Clta      |
| -1.16914508  | 1 | 9.60E-05  | 6 | Fes       |
| 0.510169058  | 1 | 9.66E-05  | 6 | Rps21     |
| -0.724032067 | 1 | 9.66E-05  | 6 | Atpif1    |
| -0.96884855  | 1 | 9.76E-05  | 6 | Swap70    |
| -0.820746449 | 1 | 9.81E-05  | 6 | Creg1     |
| -0.542432203 | 1 | 9.90E-05  | 6 | Rtn4      |
| -0.74035264  | 1 | 0.0001008 | 6 | Rgs10     |
| -0.990044632 | 1 | 0.0001021 | 6 | Itgb5     |
| -1.299578504 | 1 | 0.000103  | 6 | Hck       |
| 0.693543902  | 1 | 0.0001047 | 6 | Myl12b    |
| -1.388189792 | 1 | 0.0001091 | 6 | Rab11fip5 |
| -1.297025806 | 1 | 0.0001098 | 6 | Prcp      |
| 1.138152581  | 1 | 0.0001107 | 6 | Cyfip2    |
| -1.194513248 | 1 | 0.0001161 | 6 | Cd300a    |
| 0.367183976  | 1 | 0.000117  | 6 | Rps19-ps3 |
| 1.191935118  | 1 | 0.0001181 | 6 | Emb       |
| 1.291690587  | 1 | 0.0001226 | 6 | Mfng      |
| -0.850492086 | 1 | 0.0001233 | 6 | Ndufb9    |
| 0.496435481  | 1 | 0.0001248 | 6 | Rpl18     |
| -0.756581555 | 1 | 0.0001252 | 6 | Rnf130    |
| -0.627627033 | 1 | 0.0001263 | 6 | Atp6ap1   |
| -0.567216797 | 1 | 0.0001263 | 6 | Rragc     |
| 0.78866041   | 1 | 0.0001276 | 6 | Rbm38     |
| -1.041556299 | 1 | 0.0001306 | 6 | Camk1     |
| 1.493834553  | 1 | 0.0001331 | 6 | Nfatc3    |
| -0.825527163 | 1 | 0.0001443 | 6 | Gns       |
| 0.467938059  | 1 | 0.00015   | 6 | Pabpc1    |
| -1.278083921 | 1 | 0.0001522 | 6 | Pepd      |
| 1.315291178  | 1 | 0.0001605 | 6 | Nedd9     |
| 1.385469974  | 1 | 0.0001607 | 6 | Ssbp3     |
| -0.796380714 | 1 | 0.0001638 | 6 | Lrp1      |
| -1.155804278 | 1 | 0.0001702 | 6 | Rnf13     |
| -0.878645723 | 1 | 0.0001733 | 6 | Rnh1      |
| -1.204442366 | 1 | 0.0001739 | 6 | P2rx4     |
| -0.88109197  | 1 | 0.0001744 | 6 | Rasgef1b  |
| -1.011760854 | 1 | 0.0001786 | 6 | Rab31     |
| -0.778136709 | 1 | 0.0001868 | 6 | Pip4k2a   |
| -0.91278743  | 1 | 0.00019   | 6 | Apobec1   |
| 0.376318404  | 1 | 0.0001901 | 6 | Rpl8      |
| -1.42998061  | 1 | 0.0001953 | 6 | Mpp1      |
| -0.996429781 | 1 | 0.0001954 | 6 | Ccl9      |
| -1.313315255 | 1 | 0.0002    | 6 | Fcgr1     |
| -0.765606215 | 1 | 0.0002002 | 6 | Ap3d1     |
| -0.597416335 | 1 | 0.0002008 | 6 | Ecm1      |
| -0.474294613 | 1 | 0.0002044 | 6 | Taok1     |
| 0.865196278  | 1 | 0.0002093 | 6 | Atp11b    |
| 0.815514192  | 1 | 0.0002111 | 6 | Rps8      |

|              |   |           |   |          |
|--------------|---|-----------|---|----------|
| -0.801678537 | 1 | 0.000222  | 6 | Irf5     |
| 0.517093043  | 1 | 0.0002221 | 6 | Mir703   |
| -0.938965073 | 1 | 0.000226  | 6 | Hpgds    |
| -0.441583513 | 1 | 0.000228  | 6 | Iqgap1   |
| -1.662651381 | 1 | 0.0002319 | 6 | Hip1     |
| -0.714061172 | 1 | 0.0002347 | 6 | Man2b1   |
| 0.780489927  | 1 | 0.0002486 | 6 | Psip1    |
| -0.673022777 | 1 | 0.0002507 | 6 | Tubb6    |
| -0.725178967 | 1 | 0.0002558 | 6 | Cd81     |
| -1.333525849 | 1 | 0.000259  | 6 | Ralb     |
| -1.222519756 | 1 | 0.0002636 | 6 | Cd72     |
| -0.687245449 | 1 | 0.0002674 | 6 | Jmjd1c   |
| 0.644805333  | 1 | 0.0002727 | 6 | Rps3a1   |
| -1.221957225 | 1 | 0.0002746 | 6 | Dpep2    |
| -0.665971774 | 1 | 0.0002827 | 6 | Slc6a6   |
| -0.47295192  | 1 | 0.0002831 | 6 | Nfe2l2   |
| -1.696124667 | 1 | 0.0002876 | 6 | Zmynd15  |
| -0.476009514 | 1 | 0.0002885 | 6 | Sqstm1   |
| 1.170611369  | 1 | 0.0003121 | 6 | Tfam     |
| -0.628792893 | 1 | 0.0003191 | 6 | Clec12a  |
| -1.261688182 | 1 | 0.0003198 | 6 | Tnfaip2  |
| -0.908537177 | 1 | 0.0003228 | 6 | Fndc3a   |
| -1.18836653  | 1 | 0.0003241 | 6 | Ncf2     |
| -0.641851403 | 1 | 0.0003289 | 6 | Smdt1    |
| -0.364941858 | 1 | 0.0003306 | 6 | Vim      |
| -0.896263398 | 1 | 0.0003515 | 6 | Fuca1    |
| -0.772644831 | 1 | 0.0003547 | 6 | Blvrb    |
| 0.890567057  | 1 | 0.0003582 | 6 | Gstp1    |
| -1.283657076 | 1 | 0.0003617 | 6 | Atp6v1c1 |
| 0.781975929  | 1 | 0.0003635 | 6 | Ncoa2    |
| 0.998400392  | 1 | 0.000378  | 6 | Rps2     |
| -0.663544612 | 1 | 0.0003825 | 6 | Plin2    |
| -0.757193707 | 1 | 0.0003844 | 6 | Manf     |
| -0.522363624 | 1 | 0.0003928 | 6 | Vamp8    |
| -1.603771151 | 1 | 0.0003996 | 6 | Clec4d   |
| -1.19206535  | 1 | 0.0004231 | 6 | Reep3    |
| -0.650514834 | 1 | 0.0004253 | 6 | Dync1h1  |
| -1.038006759 | 1 | 0.0004292 | 6 | Gdf15    |
| -0.596323348 | 1 | 0.0004296 | 6 | Pld4     |
| -0.663984593 | 1 | 0.000443  | 6 | Psma7    |
| -1.082950355 | 1 | 0.0004553 | 6 | Dstn     |
| 0.543830799  | 1 | 0.000477  | 6 | Gm6654   |
| -1.68535257  | 1 | 0.0004787 | 6 | Atp13a2  |
| 0.710284871  | 1 | 0.0004839 | 6 | S100a10  |
| 0.646737313  | 1 | 0.0004989 | 6 | Ncapd2   |
| 1.008740598  | 1 | 0.0005009 | 6 | Akirin2  |
| 1.467775484  | 1 | 0.0005021 | 6 | Klrd1    |
| -0.935415742 | 1 | 0.0005031 | 6 | Anxa3    |
| -0.71356914  | 1 | 0.0005036 | 6 | Ncf4     |
| -0.824920594 | 1 | 0.0005132 | 6 | Fcrls    |
| -0.926432563 | 1 | 0.0005135 | 6 | Gas7     |
| -1.365019818 | 1 | 0.0005259 | 6 | Tns3     |
| -1.162910515 | 1 | 0.0005299 | 6 | Stom     |
| -0.940647799 | 1 | 0.0005348 | 6 | Trib1    |
| -0.740532373 | 1 | 0.0005383 | 6 | Ap2s1    |
| 1.261771083  | 1 | 0.0005507 | 6 | Nsmaf    |
| -1.236985394 | 1 | 0.000551  | 6 | Sel1l    |
| 1.10938087   | 1 | 0.0005545 | 6 | Dnajc9   |
| -0.719692607 | 1 | 0.0005549 | 6 | Zfand5   |
| -1.251282099 | 1 | 0.000579  | 6 | Nav1     |
| -0.370274477 | 1 | 0.0005797 | 6 | Fcer1g   |

|              |   |           |   |               |
|--------------|---|-----------|---|---------------|
| -1.099866283 | 1 | 0.0005803 | 6 | Spred1        |
| -1.109962436 | 1 | 0.0005823 | 6 | Zfp263        |
| 0.522810018  | 1 | 0.0005894 | 6 | Gas5          |
| 0.585087672  | 1 | 0.0006004 | 6 | Rhof          |
| -1.723332117 | 1 | 0.0006113 | 6 | Mmp14         |
| -1.087790141 | 1 | 0.0006123 | 6 | Lyz1          |
| -1.237706101 | 1 | 0.0006193 | 6 | Ash1l         |
| 1.155200545  | 1 | 0.0006266 | 6 | Ubtf          |
| 0.427093605  | 1 | 0.0006448 | 6 | Eef2          |
| -0.868062572 | 1 | 0.0006448 | 6 | Arl8b         |
| 0.765176376  | 1 | 0.0006474 | 6 | Tmem154       |
| -1.351439017 | 1 | 0.0006539 | 6 | Sash1         |
| 1.890255504  | 1 | 0.0006573 | 6 | Heca          |
| -0.93044618  | 1 | 0.0006595 | 6 | Eif4ebp1      |
| 0.632930127  | 1 | 0.0006658 | 6 | Rps7          |
| -1.023282752 | 1 | 0.0006726 | 6 | Cebpa         |
| -1.39843968  | 1 | 0.0006742 | 6 | Vps41         |
| 0.975805822  | 1 | 0.0006881 | 6 | Fam107b       |
| -1.463620673 | 1 | 0.0006996 | 6 | Plbd1         |
| 1.417956064  | 1 | 0.0007008 | 6 | Asb6          |
| -0.947587815 | 1 | 0.0007048 | 6 | Plau          |
| -0.745572749 | 1 | 0.0007072 | 6 | Daglb         |
| 0.947424062  | 1 | 0.0007139 | 6 | Prr3          |
| -1.108338002 | 1 | 0.0007144 | 6 | Ctnnbp2nl     |
| -0.530639706 | 1 | 0.00074   | 6 | Mrpl17        |
| -0.92761312  | 1 | 0.0007767 | 6 | Emp1          |
| 0.385112724  | 1 | 0.0007838 | 6 | H3f3b         |
| -0.811174387 | 1 | 0.0007874 | 6 | Itgam         |
| -1.141948602 | 1 | 0.0007921 | 6 | Lactb         |
| -0.538281495 | 1 | 0.0007944 | 6 | Dhrs3         |
| -1.559843672 | 1 | 0.0007969 | 6 | Fam20c        |
| -0.818274718 | 1 | 0.0007982 | 6 | Cpeb4         |
| 0.443109044  | 1 | 0.0008151 | 6 | Rpl39         |
| 1.079791846  | 1 | 0.0008189 | 6 | 2810417H13Rik |
| -1.443152889 | 1 | 0.0008239 | 6 | Map1lc3a      |
| -0.970543797 | 1 | 0.000828  | 6 | Pld3          |
| -0.721708667 | 1 | 0.0008356 | 6 | Erp29         |
| -1.317718707 | 1 | 0.0008417 | 6 | Pqlc1         |
| 0.317733975  | 1 | 0.0008586 | 6 | Rpl41         |
| -1.381051459 | 1 | 0.0008675 | 6 | Actn1         |
| -0.901232158 | 1 | 0.0008785 | 6 | Dnase1l1      |
| -1.658274443 | 1 | 0.0008793 | 6 | Mtmr10        |
| 0.764475312  | 1 | 0.0008943 | 6 | Nr3c1         |
| -1.020074053 | 1 | 0.0008975 | 6 | Tcirg1        |
| 0.298512413  | 1 | 0.0009022 | 6 | Rps24         |
| -0.658083681 | 1 | 0.0009029 | 6 | Qk            |
| 0.987135895  | 1 | 0.0009033 | 6 | Mta2          |
| -0.604501407 | 1 | 0.0009123 | 6 | Rnasek        |
| -0.430543578 | 1 | 0.0009142 | 6 | Asap1         |
| 0.851620108  | 1 | 0.0009257 | 6 | Spn           |
| -1.245091471 | 1 | 0.0009283 | 6 | Clec5a        |
| -0.845437986 | 1 | 0.000937  | 6 | Rsu1          |
| 0.750713756  | 1 | 0.0009373 | 6 | Stk17b        |
| -1.120273906 | 1 | 0.0009514 | 6 | Tmem37        |
| -1.124373689 | 1 | 0.000953  | 6 | Plod3         |
| -0.719998439 | 1 | 0.0009668 | 6 | Tcf4          |
| -1.472730458 | 1 | 0.0009843 | 6 | Kcnn4         |
| -0.428100538 | 1 | 0.0010073 | 6 | Atp2b1        |
| -1.021466226 | 1 | 0.0010189 | 6 | Pcyt1a        |
| -0.764768264 | 1 | 0.001021  | 6 | Anxa4         |
| -0.710783735 | 1 | 0.0010254 | 6 | Tuba1c        |

|              |   |           |   |               |
|--------------|---|-----------|---|---------------|
| -1.272064084 | 1 | 0.0010259 | 6 | Ctnnd1        |
| 1.007633682  | 1 | 0.0010344 | 6 | Zcchc11       |
| 0.292519627  | 1 | 0.0010576 | 6 | Rps14         |
| -1.088092329 | 1 | 0.0010634 | 6 | Ifnar1        |
| -0.783700542 | 1 | 0.001066  | 6 | Cenpb         |
| -0.54492088  | 1 | 0.0010662 | 6 | Pkm           |
| 0.668709744  | 1 | 0.0010727 | 6 | Dnajb6        |
| -1.185299043 | 1 | 0.0011059 | 6 | Rit1          |
| -0.8305845   | 1 | 0.0011224 | 6 | Lair1         |
| -0.554355298 | 1 | 0.0011298 | 6 | Nrp1          |
| -0.703399869 | 1 | 0.0011483 | 6 | C5ar1         |
| -0.944425545 | 1 | 0.0011714 | 6 | Vat1          |
| -0.894667511 | 1 | 0.0011717 | 6 | Clcn7         |
| 0.664959104  | 1 | 0.0012169 | 6 | Shisa5        |
| -0.758609626 | 1 | 0.0012224 | 6 | Degs1         |
| -0.377435917 | 1 | 0.0012331 | 6 | Atp6v1a       |
| -0.665714814 | 1 | 0.0012457 | 6 | Zeb2          |
| -0.993105483 | 1 | 0.0012729 | 6 | Dram2         |
| -0.589344659 | 1 | 0.0012743 | 6 | Uqcr11        |
| 1.737604784  | 1 | 0.001278  | 6 | Cst7          |
| -0.415824549 | 1 | 0.0012807 | 6 | Rrbp1         |
| -0.538105747 | 1 | 0.001284  | 6 | Phf23         |
| -0.437944401 | 1 | 0.001284  | 6 | Fos           |
| -0.584357447 | 1 | 0.0012847 | 6 | Tnf           |
| -0.744719067 | 1 | 0.0012853 | 6 | Ier3          |
| -0.723614668 | 1 | 0.001297  | 6 | Fam21         |
| -0.67956993  | 1 | 0.0013127 | 6 | Dbi           |
| -0.936689327 | 1 | 0.0013163 | 6 | Sypl          |
| -1.680805773 | 1 | 0.0013192 | 6 | Stx3          |
| -0.980690142 | 1 | 0.0013335 | 6 | Ptpro         |
| -0.642460912 | 1 | 0.0013604 | 6 | Senp2         |
| -1.10216796  | 1 | 0.0013647 | 6 | Clec4a3       |
| -0.889794245 | 1 | 0.0013665 | 6 | Arhgap17      |
| -0.607650146 | 1 | 0.0013683 | 6 | Prkcd         |
| -1.02914984  | 1 | 0.0013726 | 6 | Uap1l1        |
| -0.305321677 | 1 | 0.001374  | 6 | Rnpep         |
| -0.935820476 | 1 | 0.0013802 | 6 | Cd84          |
| -1.337936863 | 1 | 0.0013844 | 6 | Naaa          |
| -0.564671272 | 1 | 0.0014146 | 6 | Csrnp1        |
| -1.165294547 | 1 | 0.001428  | 6 | Fcgrt         |
| -1.430082652 | 1 | 0.001437  | 6 | Gga3          |
| -0.546177145 | 1 | 0.0014483 | 6 | Nucb1         |
| -1.10812476  | 1 | 0.0014689 | 6 | Rhoc          |
| -0.920908607 | 1 | 0.0014755 | 6 | Gngt2         |
| 0.624721385  | 1 | 0.0014918 | 6 | Serbp1        |
| -1.012660187 | 1 | 0.0015016 | 6 | 5031439G07Rik |
| -1.24709335  | 1 | 0.0015048 | 6 | Tep1          |
| -0.56496691  | 1 | 0.0015058 | 6 | Ap2a2         |
| 0.511199255  | 1 | 0.0015075 | 6 | Gmfg          |
| -1.1385822   | 1 | 0.0015198 | 6 | Uvrag         |
| -1.127084766 | 1 | 0.0015244 | 6 | Acp2          |
| -1.088082285 | 1 | 0.0015466 | 6 | Slc29a3       |
| -0.804626914 | 1 | 0.0015512 | 6 | Fam129b       |
| -1.018325763 | 1 | 0.0015897 | 6 | P2rx7         |
| -0.818888134 | 1 | 0.0015926 | 6 | Tmbim1        |
| 0.836965189  | 1 | 0.0016248 | 6 | Cish          |
| -1.227263242 | 1 | 0.0016298 | 6 | Pvr           |
| -0.730703713 | 1 | 0.0016361 | 6 | Myadm         |
| -0.864090831 | 1 | 0.0016645 | 6 | Slc15a3       |
| 1.333342836  | 1 | 0.0016806 | 6 | Tshz1         |
| 0.334819529  | 1 | 0.0016861 | 6 | Bysl          |

|              |   |           |   |            |
|--------------|---|-----------|---|------------|
| -0.535554183 | 1 | 0.0016971 | 6 | Serpinb6a  |
| -1.044611158 | 1 | 0.0017019 | 6 | Pf4        |
| -1.289686441 | 1 | 0.0017076 | 6 | Dctpp1     |
| 1.222040488  | 1 | 0.0017105 | 6 | Rpa1       |
| -1.236224923 | 1 | 0.0017305 | 6 | Gpr137b-ps |
| -1.333384503 | 1 | 0.0017372 | 6 | Rnf115     |
| -0.618068127 | 1 | 0.0017456 | 6 | Dnajb11    |
| 0.480235571  | 1 | 0.0017477 | 6 | S100a11    |
| -0.689094338 | 1 | 0.0017485 | 6 | Vamp3      |
| -0.455771154 | 1 | 0.0017598 | 6 | Tmx1       |
| 1.460569945  | 1 | 0.0017825 | 6 | Itgb7      |
| 0.88923287   | 1 | 0.0017842 | 6 | Rassf5     |
| -1.006739398 | 1 | 0.00179   | 6 | Mrpl54     |
| -0.506130727 | 1 | 0.001819  | 6 | Cuedc2     |
| -0.451896601 | 1 | 0.0018334 | 6 | Ptpa       |
| 1.177734432  | 1 | 0.0018591 | 6 | Vps37b     |
| -0.793904055 | 1 | 0.0018692 | 6 | P2ry6      |
| -0.687588361 | 1 | 0.0019165 | 6 | Nfe2l1     |
| 0.749620036  | 1 | 0.0019192 | 6 | Pmf1       |
| -0.600705006 | 1 | 0.0019219 | 6 | Pdia6      |
| -0.687543094 | 1 | 0.0019477 | 6 | Pgls       |
| -0.35798909  | 1 | 0.0020291 | 6 | Picalm     |
| -1.243194359 | 1 | 0.0020345 | 6 | Gpr137b    |
| -1.377838989 | 1 | 0.0020428 | 6 | Sh3pxd2a   |
| -0.842887123 | 1 | 0.0020651 | 6 | Glpr1      |
| 0.833193786  | 1 | 0.0020726 | 6 | Rpl36a1    |
| -0.742539936 | 1 | 0.0021116 | 6 | Idh2       |
| -0.780250515 | 1 | 0.0021357 | 6 | Txndc17    |
| 0.607650012  | 1 | 0.0021461 | 6 | Ndufa13    |
| -0.84552311  | 1 | 0.0021569 | 6 | Ergic3     |
| -0.832294501 | 1 | 0.0021725 | 6 | Vipas39    |
| -0.881258142 | 1 | 0.0021795 | 6 | Frmd4b     |
| -1.172822613 | 1 | 0.0021892 | 6 | Eif2a      |
| 0.367277464  | 1 | 0.0022144 | 6 | Rps3       |
| 0.823597953  | 1 | 0.0022399 | 6 | Gltscr2    |
| -0.585725918 | 1 | 0.0022564 | 6 | Capg       |
| -1.242109523 | 1 | 0.0022728 | 6 | Cxcl1      |
| -0.826595701 | 1 | 0.0022821 | 6 | Filip1l    |
| -1.123930097 | 1 | 0.0023093 | 6 | Hist1h2bc  |
| -1.364419573 | 1 | 0.0023254 | 6 | Ccl12      |
| -1.233389094 | 1 | 0.0023262 | 6 | Ntpcr      |
| 1.225014156  | 1 | 0.0023358 | 6 | Trp53inp1  |
| -0.536292341 | 1 | 0.0023692 | 6 | Hspa9      |
| -0.820204    | 1 | 0.0023738 | 6 | Cd86       |
| -0.605193645 | 1 | 0.0023816 | 6 | Farsb      |
| -1.716436459 | 1 | 0.0023921 | 6 | Wdfy4      |
| 1.048795244  | 1 | 0.0023936 | 6 | Tmpo       |
| -0.526366258 | 1 | 0.0024054 | 6 | Rab10      |
| -1.037415235 | 1 | 0.0024234 | 6 | Myo9a      |
| -1.379118867 | 1 | 0.0024289 | 6 | Hbp1       |
| -0.447528091 | 1 | 0.0024415 | 6 | Chchd1     |
| -1.048734748 | 1 | 0.0024446 | 6 | Mitf       |
| -0.309719299 | 1 | 0.0024512 | 6 | Emp3       |
| -0.715086946 | 1 | 0.0024615 | 6 | Atp6v0a1   |
| -0.404312822 | 1 | 0.0024693 | 6 | Fam105a    |
| -1.291373589 | 1 | 0.0024949 | 6 | Rufy1      |
| -0.65185705  | 1 | 0.0025041 | 6 | Brk1       |
| -0.551350336 | 1 | 0.0025525 | 6 | St3gal1    |
| 1.412406386  | 1 | 0.0025631 | 6 | Rora       |
| -0.996633597 | 1 | 0.0025767 | 6 | Galc       |
| -1.55237584  | 1 | 0.0026014 | 6 | Fn1        |



|              |   |           |   |           |
|--------------|---|-----------|---|-----------|
| 1.158375269  | 1 | 0.0026244 | 6 | Rapgef1   |
| -1.028333159 | 1 | 0.0026716 | 6 | Plk2      |
| -0.957855006 | 1 | 0.0027037 | 6 | Selm      |
| -1.25681596  | 1 | 0.0027085 | 6 | Ephx1     |
| -0.625285166 | 1 | 0.0027146 | 6 | Rab11a    |
| 0.667654792  | 1 | 0.0027563 | 6 | Eml4      |
| -0.400045654 | 1 | 0.0027645 | 6 | Rel       |
| -1.453126062 | 1 | 0.0027835 | 6 | Clec4n    |
| -1.295257268 | 1 | 0.0028392 | 6 | Ptplad2   |
| -0.883669901 | 1 | 0.0028611 | 6 | Ndufb10   |
| -1.335359738 | 1 | 0.0029615 | 6 | Sh3bp2    |
| -0.366344712 | 1 | 0.0030056 | 6 | Cyba      |
| 0.894846738  | 1 | 0.0030129 | 6 | Lbr       |
| -0.872253939 | 1 | 0.0030361 | 6 | Cpne3     |
| -0.544084611 | 1 | 0.0030379 | 6 | Sh3pxd2b  |
| 0.935993829  | 1 | 0.003063  | 6 | Per1      |
| -0.615343135 | 1 | 0.003077  | 6 | Atp6v0d1  |
| -0.639620763 | 1 | 0.0030786 | 6 | Plaur     |
| -0.74717899  | 1 | 0.0030888 | 6 | Coro1c    |
| 0.336369143  | 1 | 0.003099  | 6 | Rps19     |
| 1.161305006  | 1 | 0.0031268 | 6 | Ttc5      |
| -0.455384002 | 1 | 0.0032255 | 6 | Nfkbiz    |
| -0.676300738 | 1 | 0.0032408 | 6 | Dync1i2   |
| 1.113080039  | 1 | 0.0032462 | 6 | Cd69      |
| -0.721741818 | 1 | 0.0032693 | 6 | Lgals3bp  |
| -1.231371865 | 1 | 0.0032718 | 6 | Rab5c     |
| 0.660625836  | 1 | 0.0033484 | 6 | Cbx4      |
| 0.592697572  | 1 | 0.0033562 | 6 | Rpl6      |
| -0.58794742  | 1 | 0.0033782 | 6 | Rnf149    |
| 2.146706085  | 1 | 0.0033843 | 6 | Ly6c2     |
| 1.39182431   | 1 | 0.0033944 | 6 | H2afv     |
| 0.510725307  | 1 | 0.0033971 | 6 | Eif1      |
| -1.267986883 | 1 | 0.0034185 | 6 | Cgrrf1    |
| -0.795183505 | 1 | 0.0034245 | 6 | Capn2     |
| -0.597988455 | 1 | 0.003433  | 6 | Mef2a     |
| 0.802259268  | 1 | 0.0035086 | 6 | Srsf7     |
| -0.358856311 | 1 | 0.00352   | 6 | Cltc      |
| -0.602205374 | 1 | 0.003535  | 6 | Dctn2     |
| -1.509869919 | 1 | 0.0035498 | 6 | Dok3      |
| -0.902525539 | 1 | 0.0035997 | 6 | Slc7a7    |
| -0.414435519 | 1 | 0.0036377 | 6 | Litaf     |
| -0.334766947 | 1 | 0.0036399 | 6 | Mcl1      |
| -0.827823459 | 1 | 0.0036848 | 6 | Msra      |
| -0.336088848 | 1 | 0.003692  | 6 | Hspa5     |
| 0.715693881  | 1 | 0.003707  | 6 | Rpsa      |
| -0.705544951 | 1 | 0.0037155 | 6 | Herpud1   |
| -0.688889611 | 1 | 0.0037243 | 6 | Gm6377    |
| 0.363340677  | 1 | 0.0037261 | 6 | Rpl14-ps1 |
| -0.858398339 | 1 | 0.0037933 | 6 | Nus1      |
| -1.293889631 | 1 | 0.0037977 | 6 | Mgat1     |
| -0.420097862 | 1 | 0.0038097 | 6 | Uqcrq     |
| -0.401065554 | 1 | 0.0038127 | 6 | Phb2      |
| -0.518135379 | 1 | 0.0038712 | 6 | Pomp      |
| -1.057820974 | 1 | 0.0039718 | 6 | Il4ra     |
| 0.449193359  | 1 | 0.0039759 | 6 | Tsc22d2   |
| -0.631887597 | 1 | 0.0039874 | 6 | Ube2f     |
| -0.376284979 | 1 | 0.0040059 | 6 | Gltf      |
| 1.267783281  | 1 | 0.0040211 | 6 | Rnf145    |
| -0.551614579 | 1 | 0.0040452 | 6 | Cux1      |
| 0.331067847  | 1 | 0.0040742 | 6 | Rps11     |
| -0.327024985 | 1 | 0.0040979 | 6 | Acaa1a    |

|              |   |           |   |          |
|--------------|---|-----------|---|----------|
| 1.057234732  | 1 | 0.0041473 | 6 | Stat4    |
| -0.566296605 | 1 | 0.0042065 | 6 | Smim7    |
| -1.198961894 | 1 | 0.0042131 | 6 | Mdfic    |
| -0.906207872 | 1 | 0.0043059 | 6 | Ehd1     |
| -0.748595834 | 1 | 0.0043134 | 6 | Wwp1     |
| -1.558639892 | 1 | 0.0043141 | 6 | Lima1    |
| -0.372151951 | 1 | 0.0043632 | 6 | Atp6v1e1 |
| -0.554480009 | 1 | 0.0044031 | 6 | Abcg1    |
| -1.488416924 | 1 | 0.0044234 | 6 | Rbm47    |
| -0.404633547 | 1 | 0.004485  | 6 | Rnase4   |
| -0.493623533 | 1 | 0.0044931 | 6 | Exoc5    |
| -0.652863067 | 1 | 0.0045685 | 6 | Eif1a    |
| -0.342012845 | 1 | 0.0045837 | 6 | Ano6     |
| -0.585339104 | 1 | 0.0045937 | 6 | Lamtor1  |
| -1.438331571 | 1 | 0.004648  | 6 | Syng1    |
| -0.476914324 | 1 | 0.0046568 | 6 | Anapc13  |
| -0.797482659 | 1 | 0.0046677 | 6 | Tnip1    |
| -1.378300989 | 1 | 0.0046916 | 6 | Cdr2     |
| -0.431091606 | 1 | 0.0046974 | 6 | Rala     |
| -1.403915355 | 1 | 0.0046992 | 6 | Igsf6    |
| -0.598005576 | 1 | 0.0047099 | 6 | Lipa     |
| -0.619114106 | 1 | 0.0047126 | 6 | Myo5a    |
| -0.412214969 | 1 | 0.0047863 | 6 | Fnip1    |
| -0.736378354 | 1 | 0.0047919 | 6 | Diap2    |
| -0.607071408 | 1 | 0.0048156 | 6 | Fcgr2b   |
| -1.153800376 | 1 | 0.0048174 | 6 | Fh1      |
| -1.197752504 | 1 | 0.0048238 | 6 | Slc39a1  |
| -0.67865514  | 1 | 0.0048308 | 6 | Il10rb   |
| -1.068680742 | 1 | 0.0048564 | 6 | Rgl1     |
| -1.05674391  | 1 | 0.0049109 | 6 | Hs6st1   |
| -0.35238992  | 1 | 0.0049699 | 6 | Chmp2a   |
| -0.684681596 | 1 | 0.0049793 | 6 | Lrrc59   |
| 0.477855895  | 1 | 0.0049828 | 6 | Tnfaip3  |
| -0.442667642 | 1 | 0.0051259 | 6 | Zfp36    |
| -0.636579387 | 1 | 0.0051754 | 6 | Hpgd     |
| -1.356268935 | 1 | 0.0051909 | 6 | BC028528 |
| 0.83490903   | 1 | 0.0052028 | 6 | Emg1     |
| -0.776563286 | 1 | 0.0052103 | 6 | Mef2c    |
| -0.45994144  | 1 | 0.0052367 | 6 | Wasf2    |
| -1.468270791 | 1 | 0.0052537 | 6 | Cd300lf  |
| -0.813825749 | 1 | 0.0053514 | 6 | Aprt     |
| -0.359454307 | 1 | 0.0053566 | 6 | Arl4c    |
| -0.577291101 | 1 | 0.0053834 | 6 | Casp4    |
| -1.068822845 | 1 | 0.0053838 | 6 | Il1b     |
| 0.868874381  | 1 | 0.0054125 | 6 | Ikzf1    |
| -0.597318655 | 1 | 0.005499  | 6 | Mapre2   |
| 0.566386562  | 1 | 0.0055037 | 6 | Eif3h    |
| -0.49866488  | 1 | 0.0055284 | 6 | Snap23   |
| -0.630738026 | 1 | 0.0055671 | 6 | Maf1     |
| -0.578369274 | 1 | 0.0055709 | 6 | Eps8     |
| 1.020533909  | 1 | 0.0055778 | 6 | Ptpn7    |
| -1.40497338  | 1 | 0.0056032 | 6 | Bst1     |
| -0.814690651 | 1 | 0.0056045 | 6 | Snx1     |
| -0.877032845 | 1 | 0.0056251 | 6 | Rrp1     |
| -1.0317269   | 1 | 0.0056278 | 6 | Tlr13    |
| 0.905476786  | 1 | 0.0056425 | 6 | Elf1     |
| -1.146964235 | 1 | 0.0056711 | 6 | Nagk     |
| -0.805129795 | 1 | 0.0056799 | 6 | Cnih4    |
| -0.915181858 | 1 | 0.0057382 | 6 | Psmd7    |
| -0.478259638 | 1 | 0.0058291 | 6 | Lims1    |
| -0.714143521 | 1 | 0.005839  | 6 | Cic      |

|              |   |           |   |               |
|--------------|---|-----------|---|---------------|
| -0.65677854  | 1 | 0.0058485 | 6 | Rhob          |
| 1.622909807  | 1 | 0.0058906 | 6 | D16Ert472e    |
| -0.794759585 | 1 | 0.0059012 | 6 | Snx30         |
| -0.711317776 | 1 | 0.0059554 | 6 | Slc8b1        |
| -0.534762211 | 1 | 0.0059689 | 6 | Pip5k1c       |
| 1.078032921  | 1 | 0.0059699 | 6 | Ints6         |
| 0.722048071  | 1 | 0.0059751 | 6 | Vps72         |
| -1.418921993 | 1 | 0.0060436 | 6 | Fgr           |
| -0.48066206  | 1 | 0.0060613 | 6 | Ehd4          |
| -0.67267899  | 1 | 0.006081  | 6 | Tgfbr1        |
| 0.737611419  | 1 | 0.0061122 | 6 | Nr1d1         |
| 0.56754501   | 1 | 0.0061141 | 6 | Prkdc         |
| 0.847187606  | 1 | 0.0061258 | 6 | Alyref        |
| -0.825410109 | 1 | 0.0061767 | 6 | Ppp4r2        |
| 0.402224665  | 1 | 0.0061851 | 6 | Rpl7          |
| -0.953641719 | 1 | 0.0062054 | 6 | Plin3         |
| 1.105574576  | 1 | 0.006218  | 6 | Rmnd5b        |
| -0.864322563 | 1 | 0.0062215 | 6 | Renbp         |
| 0.610229023  | 1 | 0.0062414 | 6 | Cnn2          |
| -0.317630493 | 1 | 0.0062582 | 6 | Ptms          |
| -0.371358911 | 1 | 0.0063387 | 6 | Sat1          |
| -0.734163898 | 1 | 0.0063495 | 6 | Pon3          |
| 1.028009666  | 1 | 0.0063657 | 6 | 2410004B18Rik |
| -1.132260738 | 1 | 0.0063871 | 6 | Nrp2          |
| -1.159607389 | 1 | 0.0063884 | 6 | Gabarapl1     |
| 1.510873921  | 1 | 0.0063953 | 6 | Sep.06        |
| -1.187859864 | 1 | 0.0064354 | 6 | Zak           |
| 0.821406126  | 1 | 0.0064639 | 6 | Pla2g16       |
| -0.490129617 | 1 | 0.0064867 | 6 | Il10ra        |
| -0.709133294 | 1 | 0.00657   | 6 | Cd93          |
| -0.516223047 | 1 | 0.0066267 | 6 | Wdr26         |
| 0.998124598  | 1 | 0.0066574 | 6 | Satb1         |
| -0.927133743 | 1 | 0.0066601 | 6 | Irf1          |
| -0.57080552  | 1 | 0.006672  | 6 | Atp7a         |
| -0.354455918 | 1 | 0.0066871 | 6 | Ywhae         |
| -1.159689449 | 1 | 0.0066972 | 6 | Folr2         |
| 0.755283443  | 1 | 0.0067041 | 6 | Srsf3         |
| 0.359851889  | 1 | 0.0067522 | 6 | Srgn          |
| -0.902498223 | 1 | 0.0067972 | 6 | Cd302         |
| -0.831189468 | 1 | 0.0068013 | 6 | Mrc1          |
| 0.984403376  | 1 | 0.0069642 | 6 | Crbn          |
| -1.270950874 | 1 | 0.0070167 | 6 | Dusp16        |
| -0.384201282 | 1 | 0.00705   | 6 | Sdf2          |
| -1.223218278 | 1 | 0.007138  | 6 | Cdc34         |
| -0.388021057 | 1 | 0.0071578 | 6 | Map7d1        |
| -0.523008541 | 1 | 0.0071759 | 6 | Baz2b         |
| -0.927133743 | 1 | 0.0071882 | 6 | Rap2a         |
| 0.333167091  | 1 | 0.0072426 | 6 | Hnrnpf        |
| -0.792420081 | 1 | 0.0072702 | 6 | Elovl1        |
| 0.449840618  | 1 | 0.0073761 | 6 | Rplp2         |
| -0.419541468 | 1 | 0.0073789 | 6 | Ccrl2         |
| -1.136779113 | 1 | 0.0073958 | 6 | Adam15        |
| -0.422997008 | 1 | 0.0074362 | 6 | Nudt9         |
| -1.101699474 | 1 | 0.0075438 | 6 | Bcl3          |
| -0.82591799  | 1 | 0.0076093 | 6 | Usp8          |
| -0.670777456 | 1 | 0.0076139 | 6 | Ndufs8        |
| 0.689288717  | 1 | 0.007636  | 6 | Cmc1          |
| -1.439347251 | 1 | 0.0076361 | 6 | Mgrn1         |
| -0.2828752   | 1 | 0.0076731 | 6 | Mrpl52        |
| 0.614828676  | 1 | 0.0077848 | 6 | Nfatc1        |
| -0.452764165 | 1 | 0.0077849 | 6 | Setd2         |

|              |   |           |   |               |
|--------------|---|-----------|---|---------------|
| -0.649794979 | 1 | 0.0078363 | 6 | Rpain         |
| 0.591036414  | 1 | 0.00793   | 6 | Ifngr1        |
| -1.018413294 | 1 | 0.0079704 | 6 | Rab32         |
| -0.458299694 | 1 | 0.0080273 | 6 | Sepp1         |
| -0.767267454 | 1 | 0.008076  | 6 | Axl           |
| -1.038675519 | 1 | 0.0080938 | 6 | Srsf9         |
| -0.718916591 | 1 | 0.0081705 | 6 | Psma6         |
| 0.844907959  | 1 | 0.0081817 | 6 | Hk1           |
| -0.352625998 | 1 | 0.008208  | 6 | Ctnnb1        |
| 1.050446032  | 1 | 0.0082099 | 6 | Dnajc1        |
| -0.584709181 | 1 | 0.0082893 | 6 | Grb2          |
| -0.671995717 | 1 | 0.0082971 | 6 | Ccl2          |
| -0.638105775 | 1 | 0.0083111 | 6 | Nampt         |
| -0.390536975 | 1 | 0.008349  | 6 | Ech1          |
| -1.408366401 | 1 | 0.0083651 | 6 | Slc37a2       |
| -0.364521876 | 1 | 0.0084823 | 6 | Ccl3          |
| -0.941470441 | 1 | 0.0085215 | 6 | Myo9b         |
| -0.389095027 | 1 | 0.0085528 | 6 | Mir692-1      |
| 0.663841605  | 1 | 0.0085595 | 6 | B3glct        |
| 0.739165817  | 1 | 0.0086084 | 6 | Orai2         |
| 0.532880391  | 1 | 0.0086214 | 6 | Rpl37         |
| 0.985717367  | 1 | 0.0086714 | 6 | Alad          |
| -0.893358833 | 1 | 0.0086851 | 6 | Mrpl11        |
| -1.404772865 | 1 | 0.0087321 | 6 | Kif1c         |
| -0.300391224 | 1 | 0.0087662 | 6 | Glud1         |
| -1.001790799 | 1 | 0.008792  | 6 | Mtfr1l        |
| -0.811796286 | 1 | 0.0087977 | 6 | Cebpg         |
| -0.290886719 | 1 | 0.0088539 | 6 | Atp6ap2       |
| -0.350271275 | 1 | 0.00893   | 6 | Stard3        |
| -0.407081196 | 1 | 0.0089346 | 6 | Ergic2        |
| -0.847095028 | 1 | 0.0089854 | 6 | Cmtm3         |
| -0.584665229 | 1 | 0.009034  | 6 | Cops5         |
| 0.959170452  | 1 | 0.0090673 | 6 | Mmd           |
| -0.674473419 | 1 | 0.0091057 | 6 | Map3k5        |
| 0.70652421   | 1 | 0.0091285 | 6 | Ncor1         |
| -1.144760455 | 1 | 0.009144  | 6 | Msmo1         |
| -0.781122787 | 1 | 0.009152  | 6 | Mpc2          |
| -0.830356227 | 1 | 0.0092495 | 6 | Spp1          |
| -0.523167692 | 1 | 0.009268  | 6 | Ncoa7         |
| -1.193554118 | 1 | 0.0092761 | 6 | Adrbk2        |
| -1.064597467 | 1 | 0.0093116 | 6 | Mmp12         |
| 0.540835042  | 1 | 0.0093554 | 6 | Tmem66        |
| -0.838271292 | 1 | 0.0093795 | 6 | Htra2         |
| -0.49742892  | 1 | 0.0093979 | 6 | Gatm          |
| -0.847606018 | 1 | 0.0094296 | 6 | Ndrgr1        |
| -0.468244347 | 1 | 0.0094631 | 6 | Dynlt3        |
| 0.984435161  | 1 | 0.0095294 | 6 | Sh2b1         |
| 0.387081242  | 1 | 0.0095682 | 6 | Rpl14         |
| -0.820114429 | 1 | 0.0096063 | 6 | Kdm5c         |
| -0.616264033 | 1 | 0.0096171 | 6 | Lmo2          |
| -0.509344263 | 1 | 0.0096432 | 6 | Tmem208       |
| -0.59565018  | 1 | 0.0096662 | 6 | lds           |
| -0.938384542 | 1 | 0.0097044 | 6 | 0610012G03Rik |
| 0.409734188  | 1 | 0.0097303 | 6 | Mir684-1      |
| -1.034741275 | 1 | 0.0097342 | 6 | Rnf111        |
| -1.081400927 | 1 | 0.0097369 | 6 | Cyp27a1       |
| 1.002469857  | 1 | 0.0097391 | 6 | Sh3gl1        |
| -1.240049558 | 1 | 0.0097654 | 6 | Mfsd11        |
| -1.45113244  | 1 | 0.0098185 | 6 | Ttyh2         |
| -0.458682332 | 1 | 0.0098408 | 6 | N4bp1         |
| 1.159069568  | 1 | 0.0098671 | 6 | Nfyb          |

|              |             |           |   |          |
|--------------|-------------|-----------|---|----------|
| -1.010252546 | 1           | 0.0098813 | 6 | Atp8a1   |
| 1.77645789   | 1.76E-11    | 1.32E-15  | 7 | Ccl7     |
| 1.416369902  | 1.90E-10    | 1.42E-14  | 7 | Ccl2     |
| 1.361740983  | 6.67E-10    | 5.00E-14  | 7 | Cbr2     |
| 1.320544478  | 5.50E-09    | 4.12E-13  | 7 | F13a1    |
| 1.132567537  | 2.38E-08    | 1.78E-12  | 7 | Mrc1     |
| 0.961772705  | 2.68E-07    | 2.01E-11  | 7 | Ccl3     |
| 0.849597623  | 3.46E-07    | 2.59E-11  | 7 | Cxcl2    |
| 0.881897796  | 7.42E-07    | 5.56E-11  | 7 | Ccl4     |
| 1.271946141  | 1.00E-06    | 7.52E-11  | 7 | Folr2    |
| -2.299760056 | 1.79E-06    | 1.34E-10  | 7 | Gngt2    |
| 1.607586862  | 2.14E-06    | 1.60E-10  | 7 | Ccl12    |
| 1.492956917  | 5.86E-06    | 4.39E-10  | 7 | Rgl1     |
| 1.250488919  | 6.05E-06    | 4.53E-10  | 7 | Cd163    |
| 1.241755741  | 7.79E-06    | 5.83E-10  | 7 | Lyve1    |
| 1.150771199  | 1.03E-05    | 7.69E-10  | 7 | Gas6     |
| 1.050062613  | 1.41E-05    | 1.06E-09  | 7 | Pf4      |
| 0.66468407   | 1.77E-05    | 1.32E-09  | 7 | Sepp1    |
| -1.917280834 | 4.83E-05    | 3.62E-09  | 7 | Lpl      |
| 0.971577239  | 6.64E-05    | 4.97E-09  | 7 | Ier3     |
| 0.969098754  | 7.37E-05    | 5.52E-09  | 7 | C4b      |
| 0.833252947  | 0.000161478 | 1.21E-08  | 7 | Al607873 |
| 1.070370148  | 0.000173558 | 1.30E-08  | 7 | Marcksl1 |
| 1.509583574  | 0.000178493 | 1.34E-08  | 7 | Ltc4s    |
| 1.233417545  | 0.000258059 | 1.93E-08  | 7 | Fcgrt    |
| 0.700633828  | 0.000473225 | 3.54E-08  | 7 | Ifitm3   |
| -0.919236513 | 0.000583347 | 4.37E-08  | 7 | Lgals3   |
| -2.104255065 | 0.000681703 | 5.11E-08  | 7 | Lhfpl2   |
| 0.452860952  | 0.00118203  | 8.85E-08  | 7 | C1qc     |
| -1.834759026 | 0.001257566 | 9.42E-08  | 7 | Anxa1    |
| -1.033633075 | 0.001414949 | 1.06E-07  | 7 | Cd52     |
| 0.582677359  | 0.001468991 | 1.10E-07  | 7 | Plek     |
| 0.547440191  | 0.001934072 | 1.45E-07  | 7 | Serinc3  |
| 0.634418917  | 0.002200385 | 1.65E-07  | 7 | Jund     |
| 1.144415885  | 0.003904412 | 2.92E-07  | 7 | Cxcl10   |
| 0.667503508  | 0.003957268 | 2.96E-07  | 7 | Dab2     |
| 0.590912802  | 0.004318314 | 3.23E-07  | 7 | Ifitm2   |
| 0.565239869  | 0.005077689 | 3.80E-07  | 7 | Ly6e     |
| -1.322557587 | 0.006230793 | 4.67E-07  | 7 | Aprt     |
| -2.118086411 | 0.007055533 | 5.28E-07  | 7 | Gpnmb    |
| -1.091500611 | 0.00925923  | 6.93E-07  | 7 | Anxa2    |
| 1.704034429  | 0.009468054 | 7.09E-07  | 7 | Ccl24    |
| 0.752684125  | 0.010330954 | 7.74E-07  | 7 | Ccl8     |
| -1.914302411 | 0.011790875 | 8.83E-07  | 7 | Adam8    |
| 0.743647834  | 0.013511146 | 1.01E-06  | 7 | Ifi27l2a |
| 1.441576329  | 0.014559317 | 1.09E-06  | 7 | Timd4    |
| 1.025385452  | 0.016399719 | 1.23E-06  | 7 | Cfh      |
| -0.763897155 | 0.017552626 | 1.31E-06  | 7 | Atox1    |
| 1.695472588  | 0.021579842 | 1.62E-06  | 7 | Ifit3    |
| -0.946473029 | 0.0220635   | 1.65E-06  | 7 | S100a6   |
| 1.144415383  | 0.024268135 | 1.82E-06  | 7 | Mtmr12   |
| 1.106165011  | 0.027023161 | 2.02E-06  | 7 | Isg15    |
| 0.75035731   | 0.03259009  | 2.44E-06  | 7 | Ctsc     |
| -1.049183466 | 0.034102648 | 2.55E-06  | 7 | Gm2a     |
| 0.828353131  | 0.035166723 | 2.63E-06  | 7 | C5ar1    |
| -1.099379019 | 0.037895816 | 2.84E-06  | 7 | Cd72     |
| -1.711023081 | 0.039065661 | 2.93E-06  | 7 | Csf2rb2  |
| -1.473406866 | 0.04209778  | 3.15E-06  | 7 | Pfkip    |
| 1.313330315  | 0.042446461 | 3.18E-06  | 7 | Pla2g2d  |
| -0.89450811  | 0.04309925  | 3.23E-06  | 7 | Arpp19   |
| -1.708381398 | 0.044905833 | 3.36E-06  | 7 | Mmp12    |

|                    |                    |                 |          |              |
|--------------------|--------------------|-----------------|----------|--------------|
| 1.375998805        | 0.04980838         | 3.73E-06        | 7        | Cp           |
| -1.457682714       | 0.053959117        | 4.04E-06        | 7        | Ncf4         |
| -0.737471862       | 0.061809914        | 4.63E-06        | 7        | Mpeg1        |
| 0.522509294        | 0.067576062        | 5.06E-06        | 7        | Klf6         |
| -1.221820874       | 0.070162639        | 5.25E-06        | 7        | Clec7a       |
| 1.050214819        | 0.072602855        | 5.44E-06        | 7        | Abca9        |
| -0.722072338       | 0.07514335         | 5.63E-06        | 7        | Ddost        |
| -1.442369892       | 0.07839703         | 5.87E-06        | 7        | Polr2e       |
| 0.355720714        | 0.080296057        | 6.01E-06        | 7        | C1qb         |
| -1.352829062       | 0.082012318        | 6.14E-06        | 7        | Ezr          |
| 0.936202914        | 0.089768008        | 6.72E-06        | 7        | Trib1        |
| 1.116571955        | 0.096056885        | 7.19E-06        | 7        | Igfbp4       |
| -1.055965567       | 0.097176072        | 7.28E-06        | 7        | Fam107b      |
| -1.528045          | 0.097921688        | 7.33E-06        | 7        | Fn1          |
| -1.977171328       | 0.099920797        | 7.48E-06        | 7        | Il7r         |
| -1.274168835       | 0.111162374        | 8.33E-06        | 7        | Cd9          |
| 0.851943309        | 0.11920661         | 8.93E-06        | 7        | Pmp22        |
| 0.582217451        | 0.129431716        | 9.69E-06        | 7        | Cltc         |
| -2.118768628       | 0.131190366        | 9.83E-06        | 7        | Hilpda       |
| 0.713014983        | 0.137344181        | 1.03E-05        | 7        | Cd81         |
| 1.425044364        | 0.152072075        | 1.14E-05        | 7        | Npl          |
| -0.75093935        | 0.178380854        | 1.34E-05        | 7        | Alcam        |
| -0.879824694       | 0.189013128        | 1.42E-05        | 7        | AB124611     |
| 0.594626691        | 0.191616348        | 1.44E-05        | 7        | Stab1        |
| -1.8106221         | 0.196455332        | 1.47E-05        | 7        | Fam20c       |
| 0.97509775         | 0.201162941        | 1.51E-05        | 7        | Mnda         |
| -1.31397132        | 0.209245504        | 1.57E-05        | 7        | Nhp2         |
| 0.43224953         | 0.210304939        | 1.58E-05        | 7        | Atp2b1       |
| -1.291785525       | 0.221346793        | 1.66E-05        | 7        | Api5         |
| 0.47806712         | 0.227132712        | 1.70E-05        | 7        | Cdk2         |
| -1.325986926       | 0.25132503         | 1.88E-05        | 7        | Yy1          |
| 0.339767736        | 0.258497535        | 1.94E-05        | 7        | Ubc          |
| 0.852060789        | 0.277081351        | 2.08E-05        | 7        | Ccl9         |
| 1.031201972        | 0.285484852        | 2.14E-05        | 7        | Usp18        |
| -0.81408228        | 0.30237111         | 2.26E-05        | 7        | Lsp1         |
| 0.989773824        | 0.306932609        | 2.30E-05        | 7        | Birc3        |
| 0.888902254        | 0.310314992        | 2.32E-05        | 7        | Plau         |
| 1.277002609        | 0.334993642        | 2.51E-05        | 7        | Colec12      |
| <b>0.414658624</b> | <b>0.344796762</b> | <b>2.58E-05</b> | <b>7</b> | <b>Csf1r</b> |
| 0.592200592        | 0.349874651        | 2.62E-05        | 7        | Aoah         |
| -1.235271902       | 0.359656155        | 2.69E-05        | 7        | Jak2         |
| -1.795281936       | 0.375533226        | 2.81E-05        | 7        | Itgax        |
| -1.300882497       | 0.39868163         | 2.99E-05        | 7        | Sel1l        |
| -1.409393893       | 0.416501214        | 3.12E-05        | 7        | Mrpl30       |
| -0.75560279        | 0.422464907        | 3.16E-05        | 7        | Sdhb         |
| -1.069187608       | 0.431559788        | 3.23E-05        | 7        | Abcg1        |
| 0.945486208        | 0.440997478        | 3.30E-05        | 7        | Gas7         |
| 1.162052024        | 0.4415454          | 3.31E-05        | 7        | Errfi1       |
| 0.971270663        | 0.458223396        | 3.43E-05        | 7        | Cd209f       |
| 0.965381146        | 0.465538354        | 3.49E-05        | 7        | Hmox1        |
| -1.387793113       | 0.465679517        | 3.49E-05        | 7        | Malt1        |
| -1.593107359       | 0.48826895         | 3.66E-05        | 7        | Tspan13      |
| -1.862702523       | 0.495987315        | 3.71E-05        | 7        | Tes          |
| 0.384967823        | 0.49631505         | 3.72E-05        | 7        | Mcl1         |
| -1.699018664       | 0.503964271        | 3.77E-05        | 7        | Cytip        |
| -0.854828381       | 0.517141259        | 3.87E-05        | 7        | Myeov2       |
| -0.986335592       | 0.527650052        | 3.95E-05        | 7        | Vdac2        |
| -1.72981113        | 0.529555971        | 3.97E-05        | 7        | Tgm2         |
| -0.90322523        | 0.537723537        | 4.03E-05        | 7        | Mmp14        |
| -2.212023966       | 0.542667405        | 4.06E-05        | 7        | Napsa        |
| 0.60664591         | 0.555350631        | 4.16E-05        | 7        | Aif1         |

|              |             |           |   |          |
|--------------|-------------|-----------|---|----------|
| 0.802629475  | 0.561203506 | 4.20E-05  | 7 | Rnase4   |
| -1.182230044 | 0.568153476 | 4.26E-05  | 7 | Zfp207   |
| 0.490315249  | 0.568583701 | 4.26E-05  | 7 | Cd14     |
| -1.412522353 | 0.616782858 | 4.62E-05  | 7 | Bhlhe40  |
| 0.795568281  | 0.619746657 | 4.64E-05  | 7 | Runx1    |
| -0.923337891 | 0.626716398 | 4.69E-05  | 7 | Ifi30    |
| 0.653974138  | 0.666216443 | 4.99E-05  | 7 | Ednrb    |
| -1.311145967 | 0.708794752 | 5.31E-05  | 7 | Dpep2    |
| -1.826786062 | 0.732371162 | 5.49E-05  | 7 | Mrps34   |
| 1.524236589  | 0.758900255 | 5.68E-05  | 7 | Rcan1    |
| -0.735102451 | 0.760701971 | 5.70E-05  | 7 | Aldoa    |
| -0.435531793 | 0.794203123 | 5.95E-05  | 7 | Rps3     |
| -1.849239554 | 0.814256965 | 6.10E-05  | 7 | Pdlim7   |
| 0.252886333  | 0.822446816 | 6.16E-05  | 7 | Cst3     |
| 1.34376789   | 0.830769554 | 6.22E-05  | 7 | Fxyd2    |
| -0.998282622 | 0.853615644 | 6.39E-05  | 7 | Csf2rb   |
| -0.915549062 | 0.906347449 | 6.79E-05  | 7 | Copb2    |
| -1.175534802 | 0.920846964 | 6.90E-05  | 7 | Commdd8  |
| -0.830420426 | 0.970308624 | 7.27E-05  | 7 | S100a11  |
| 0.493271909  | 1           | 7.52E-05  | 7 | Mt1      |
| 0.6378805    | 1           | 7.53E-05  | 7 | Tnf      |
| -1.153368235 | 1           | 7.56E-05  | 7 | Spp1     |
| -1.103633145 | 1           | 7.60E-05  | 7 | Acp5     |
| -0.417642168 | 1           | 7.83E-05  | 7 | Pbxip1   |
| -1.98142922  | 1           | 8.10E-05  | 7 | Syng1    |
| -0.88075929  | 1           | 8.18E-05  | 7 | Tpm4     |
| -1.120105641 | 1           | 8.34E-05  | 7 | Sema4d   |
| -1.406421978 | 1           | 8.65E-05  | 7 | Yipf3    |
| -1.055896803 | 1           | 8.66E-05  | 7 | Polr2g   |
| -0.432325549 | 1           | 8.74E-05  | 7 | Rpl32    |
| 1.780176328  | 1           | 8.96E-05  | 7 | Elk1     |
| -0.812299039 | 1           | 9.26E-05  | 7 | Rpl23    |
| -1.625343114 | 1           | 9.29E-05  | 7 | Eepd1    |
| -1.20882817  | 1           | 9.30E-05  | 7 | Ssr2     |
| -0.877345154 | 1           | 9.79E-05  | 7 | Rgs1     |
| -0.908139694 | 1           | 0.0001009 | 7 | Pik3cb   |
| 0.526239654  | 1           | 0.0001037 | 7 | Zfp36    |
| -1.254643255 | 1           | 0.0001102 | 7 | Slc37a2  |
| 0.640947964  | 1           | 0.0001111 | 7 | Plekhg5  |
| -0.993454876 | 1           | 0.0001112 | 7 | Eef1d    |
| -1.715651908 | 1           | 0.0001118 | 7 | Tmem43   |
| 1.009351556  | 1           | 0.0001171 | 7 | P2ry12   |
| 0.486354778  | 1           | 0.0001242 | 7 | Tmem176b |
| -0.649338355 | 1           | 0.0001261 | 7 | Psap     |
| -0.999524757 | 1           | 0.0001347 | 7 | Stk24    |
| -1.101605798 | 1           | 0.0001369 | 7 | Ptpre    |
| 1.202299576  | 1           | 0.0001389 | 7 | Ifit2    |
| -1.847661151 | 1           | 0.0001396 | 7 | Emb      |
| -1.049453934 | 1           | 0.0001404 | 7 | Ssrp1    |
| -0.959303318 | 1           | 0.0001433 | 7 | Mien1    |
| -0.685744706 | 1           | 0.0001451 | 7 | Dad1     |
| -1.521889763 | 1           | 0.0001454 | 7 | Fgr      |
| -0.922721815 | 1           | 0.0001464 | 7 | Tmem160  |
| 0.320959058  | 1           | 0.0001498 | 7 | Lyz2     |
| 0.630532623  | 1           | 0.0001568 | 7 | Cd83     |
| -0.448693461 | 1           | 0.0001592 | 7 | Rilpl2   |
| 0.704874875  | 1           | 0.0001608 | 7 | Kdm6b    |
| 0.662550775  | 1           | 0.000167  | 7 | Ppp1r15a |
| -1.699610247 | 1           | 0.0001699 | 7 | Gcc2     |
| 1.394158496  | 1           | 0.0001782 | 7 | Tfpi     |
| -0.943106262 | 1           | 0.0001813 | 7 | Smpdl3a  |

|              |   |           |   |               |
|--------------|---|-----------|---|---------------|
| -0.918126425 | 1 | 0.0001825 | 7 | Myo1f         |
| 1.394635416  | 1 | 0.000184  | 7 | Lpin1         |
| -0.83077192  | 1 | 0.0001903 | 7 | Rnh1          |
| -0.742655424 | 1 | 0.0001907 | 7 | Smdt1         |
| -1.705030488 | 1 | 0.0001935 | 7 | Hint2         |
| 0.860090728  | 1 | 0.000209  | 7 | Gda           |
| -0.83012289  | 1 | 0.0002191 | 7 | Tomm70a       |
| -0.563700449 | 1 | 0.0002227 | 7 | Psmc4         |
| -1.090513864 | 1 | 0.0002373 | 7 | Tmed3         |
| 1.271218993  | 1 | 0.0002391 | 7 | Chd1          |
| 1.899955717  | 1 | 0.0002426 | 7 | Oasl1         |
| -0.273132941 | 1 | 0.0002463 | 7 | Psen2         |
| -1.425089708 | 1 | 0.0002479 | 7 | Fuca2         |
| 1.348402221  | 1 | 0.0002522 | 7 | Calml4        |
| -1.017898687 | 1 | 0.0002665 | 7 | Ndufb7        |
| 0.497995963  | 1 | 0.0002851 | 7 | Zfp361l       |
| -1.136562351 | 1 | 0.0002863 | 7 | Ndrgr1        |
| -0.329393375 | 1 | 0.0002905 | 7 | Caprin1       |
| 0.535241856  | 1 | 0.0002908 | 7 | Nfkbiz        |
| -0.33395121  | 1 | 0.0002933 | 7 | Gm13826       |
| 0.483536961  | 1 | 0.0002965 | 7 | Trf           |
| -0.521314908 | 1 | 0.0003056 | 7 | Fxyd5         |
| -0.559042748 | 1 | 0.0003098 | 7 | Scarb2        |
| -0.899184763 | 1 | 0.0003179 | 7 | Hspe1         |
| -0.938237946 | 1 | 0.0003247 | 7 | Glipr1        |
| 1.528364265  | 1 | 0.000329  | 7 | Ifit1         |
| -1.109198681 | 1 | 0.0003295 | 7 | Rnf7          |
| -0.554755304 | 1 | 0.0003319 | 7 | Cox6a1        |
| -1.087142102 | 1 | 0.0003335 | 7 | Stat6         |
| -0.704032866 | 1 | 0.0003433 | 7 | Ccdc12        |
| -0.700060562 | 1 | 0.0003467 | 7 | Cd47          |
| 0.944426245  | 1 | 0.0003522 | 7 | Samd9l        |
| -1.144164597 | 1 | 0.0003591 | 7 | Slc25a39      |
| -1.589972189 | 1 | 0.0003639 | 7 | Scd2          |
| -1.651861014 | 1 | 0.0003657 | 7 | Cops5         |
| -0.712102482 | 1 | 0.0003683 | 7 | Cct4          |
| 0.703560982  | 1 | 0.0003695 | 7 | Ehd4          |
| -1.000042758 | 1 | 0.0003699 | 7 | Gpr137b-ps    |
| -0.52397963  | 1 | 0.0003763 | 7 | Cotl1         |
| -0.559091289 | 1 | 0.0003785 | 7 | Ndufa2        |
| -0.609831318 | 1 | 0.0003827 | 7 | Myl12a        |
| 0.318096845  | 1 | 0.0003879 | 7 | NP-904329.1   |
| -1.164567727 | 1 | 0.0004089 | 7 | Pdhh          |
| -0.411908603 | 1 | 0.0004159 | 7 | Ppp1ca        |
| -0.928527995 | 1 | 0.0004227 | 7 | Psmc2         |
| -0.675524792 | 1 | 0.0004305 | 7 | Pum1          |
| 0.290587238  | 1 | 0.0004514 | 7 | 2900060B14Rik |
| -0.583602458 | 1 | 0.0004576 | 7 | Psmc1         |
| 0.848648277  | 1 | 0.0004679 | 7 | Slc9a9        |
| -1.775023655 | 1 | 0.0004802 | 7 | Slc7a11       |
| 0.649970725  | 1 | 0.0004826 | 7 | Tmem127       |
| -0.257146292 | 1 | 0.0004837 | 7 | Pdia6         |
| 0.707328253  | 1 | 0.0004885 | 7 | Wwp1          |
| -0.710051161 | 1 | 0.00049   | 7 | Psma6         |
| -1.551273853 | 1 | 0.0005016 | 7 | 1700123O20Rik |
| -0.469303349 | 1 | 0.0005039 | 7 | Gns           |
| -1.598411868 | 1 | 0.0005042 | 7 | Galnt6        |
| 0.748012995  | 1 | 0.00052   | 7 | Zfhx3         |
| -1.094181357 | 1 | 0.0005359 | 7 | Wsb2          |
| -0.89944764  | 1 | 0.0005376 | 7 | Bin2          |
| -0.887615363 | 1 | 0.0005397 | 7 | Pld3          |



|              |   |           |   |          |        |
|--------------|---|-----------|---|----------|--------|
| -0.575436662 | 1 | 0.0005398 | 7 | Ggh      |        |
| -1.881484078 | 1 | 0.000541  | 7 | Mrpl34   |        |
| 1.190306364  | 1 | 0.0005453 | 7 | Ifi203   |        |
| -0.605906298 | 1 | 0.000551  | 7 | Chp1     |        |
| 0.384179071  | 1 | 0.0005705 | 7 | C1qa     |        |
| -0.849026542 | 1 | 0.0005745 | 7 | Vps28    |        |
| 1.383218191  | 1 | 0.0005786 | 7 | Etv1     |        |
| -0.521230615 | 1 | 0.0005856 | 7 | H13      |        |
| -1.546177539 | 1 | 0.0005884 | 7 | Frrs1    |        |
| -1.853278418 | 1 | 0.0005888 | 7 | Itgal    |        |
| -1.746340514 | 1 | 0.0005899 | 7 | Cadm1    |        |
| -0.485351944 | 1 | 0.0005968 | 7 | Snx1     |        |
| 0.312448722  | 1 | 0.0006196 | 7 | Slc46a3  |        |
| -1.13622289  | 1 | 0.0006216 | 7 | Cpd      |        |
| -1.137569663 | 1 | 0.0006255 | 7 | Hsd17b10 |        |
| -0.699797717 | 1 | 0.0006386 | 7 | Snrpg    |        |
| -0.986771325 | 1 | 0.0006522 | 7 | Dusp2    |        |
| -0.834806857 | 1 | 0.0006525 | 7 | Il2rg    |        |
| -0.783674809 | 1 | 0.0006717 | 7 | Ptpn6    |        |
| -0.686458987 | 1 | 0.000685  | 7 | Ndufc1   |        |
| -0.668378324 | 1 | 0.0007155 | 7 | Ndufa6   |        |
| -0.781344606 | 1 | 0.0007359 | 7 | Lipa     |        |
| -1.223108924 | 1 | 0.0007619 | 7 | Otulin   |        |
| -1.030596118 | 1 | 0.0007642 | 7 | Ube2a    |        |
| -0.729678115 | 1 | 0.0007699 | 7 | Rpl3     |        |
| -0.826231084 | 1 | 0.0007722 | 7 | Gsn      |        |
| 0.77347241   | 1 | 0.0007812 | 7 | Maf      |        |
| 0.574379703  | 1 | 0.000786  | 7 | Csrnp1   |        |
| -0.60264618  | 1 | 0.0007893 | 7 | Acsl4    |        |
| 1.095167475  | 1 | 0.0008005 | 7 | Hip1     |        |
| -0.91316952  | 1 | 0.0008312 | 7 | Stk4     |        |
| -0.701560161 | 1 | 0.0008341 | 7 | Mgea5    |        |
| -1.243738432 | 1 | 0.0008393 | 7 | Fam173a  |        |
| -1.207182627 | 1 | 0.0008413 | 7 | Pgk1     |        |
| 0.369470657  | 1 | 0.0008436 | 7 | Fcgr3    |        |
| -0.663691113 | 1 | 0.0008482 | 7 | Mical1   |        |
| 0.506889308  | 1 | 0.0008689 | 7 | Kctd12   |        |
| -0.680687825 | 1 | 0.000882  | 7 | Psmc1    |        |
| -0.937469574 | 1 | 0.0008823 | 7 | Psmd12   |        |
| -1.406222759 | 1 | 0.0008856 | 7 | Gsdmd    |        |
| -0.519502798 | 1 | 0.000886  | 7 | Itgb2    |        |
| 1.440503038  | 1 | 0.0008906 | 7 | Optn     |        |
| -0.53852644  | 1 | 0.000907  | 7 | Gnas     |        |
| 0.676311304  | 1 | 0.000938  | 7 | Zfp703   |        |
| -0.942305384 | 1 | 0.00094   | 7 |          | Sep.11 |
| -1.654977953 | 1 | 0.0009457 | 7 | Kcnn4    |        |
| -1.562679408 | 1 | 0.0009464 | 7 | Msl1     |        |
| -1.064817421 | 1 | 0.0009515 | 7 | Ndufb6   |        |
| -0.555076704 | 1 | 0.0009661 | 7 | Creg1    |        |
| -0.612892452 | 1 | 0.0009703 | 7 | Trappc4  |        |
| -0.844669782 | 1 | 0.000979  | 7 | Rsrp1    |        |
| -0.473451887 | 1 | 0.0009813 | 7 | M6pr     |        |
| -0.825312349 | 1 | 0.0009839 | 7 | Mrpl4    |        |
| 1.421275244  | 1 | 0.0009888 | 7 | Spic     |        |
| 0.862784948  | 1 | 0.0009894 | 7 | Ap2a2    |        |
| -1.596036758 | 1 | 0.001003  | 7 | Gpr35    |        |
| -1.637188439 | 1 | 0.0010089 | 7 | Arl5c    |        |
| 1.453409594  | 1 | 0.001027  | 7 | Pld1     |        |
| -1.030206392 | 1 | 0.0010302 | 7 | Tpm1     |        |
| -0.763112082 | 1 | 0.0010489 | 7 | Hpcal1   |        |
| -1.514235835 | 1 | 0.0010506 | 7 | Rhoq     |        |

|              |   |           |   |               |
|--------------|---|-----------|---|---------------|
| -0.76717036  | 1 | 0.001063  | 7 | Nemf          |
| -0.752306631 | 1 | 0.0010895 | 7 | Sla           |
| -0.729863196 | 1 | 0.0010927 | 7 | Stx3          |
| -1.599181929 | 1 | 0.0011013 | 7 | AA467197      |
| 1.27099505   | 1 | 0.0011175 | 7 | Mylk          |
| 0.450038212  | 1 | 0.0011286 | 7 | Cebpb         |
| -0.351219312 | 1 | 0.0011354 | 7 | Rtfcd1        |
| -1.409364499 | 1 | 0.0011482 | 7 | Usp4          |
| -0.819748621 | 1 | 0.0011598 | 7 | Tmbim4        |
| -1.511083083 | 1 | 0.0011781 | 7 | Zranb2        |
| 0.533043019  | 1 | 0.0011782 | 7 | Slc15a2       |
| -1.427016197 | 1 | 0.001198  | 7 | Odc1          |
| -0.571613845 | 1 | 0.0012072 | 7 | Pomp          |
| -0.374294679 | 1 | 0.0012156 | 7 | Bcas2         |
| 0.595421539  | 1 | 0.0012165 | 7 | Cflar         |
| -1.012007366 | 1 | 0.0012331 | 7 | Trappc6a      |
| -1.103295961 | 1 | 0.0012334 | 7 | Pdpn          |
| -0.527293931 | 1 | 0.0012377 | 7 | Actn4         |
| 1.038791552  | 1 | 0.0012486 | 7 | Ophn1         |
| 0.521469454  | 1 | 0.0012493 | 7 | Tgfbr2        |
| -1.546918292 | 1 | 0.0012557 | 7 | Ptprs         |
| -1.531540511 | 1 | 0.001258  | 7 | Cdkn2aipnl    |
| -1.216346731 | 1 | 0.0012594 | 7 | Cnot7         |
| -0.764335838 | 1 | 0.00126   | 7 | Eif3g         |
| 0.486817915  | 1 | 0.0012605 | 7 | Efhd2         |
| -0.499641414 | 1 | 0.0012621 | 7 | Snrpe         |
| -1.18357194  | 1 | 0.0012649 | 7 | Apex1         |
| -1.340182646 | 1 | 0.0012725 | 7 | Apbb2         |
| -0.835692626 | 1 | 0.0012869 | 7 | 1810026B05Rik |
| -0.636642914 | 1 | 0.0012941 | 7 | Cox5a         |
| -0.601727009 | 1 | 0.0013043 | 7 | Ppib          |
| -1.626586907 | 1 | 0.0013077 | 7 | Stx8          |
| -1.475555094 | 1 | 0.0013127 | 7 | Arrdc1        |
| -0.268043291 | 1 | 0.0013132 | 7 | Cyfip2        |
| 1.0491996    | 1 | 0.0013206 | 7 | Itsn1         |
| -0.895490682 | 1 | 0.0013278 | 7 | 2410015M20Rik |
| -0.93758922  | 1 | 0.00137   | 7 | Srsf11        |
| 1.130847611  | 1 | 0.0013741 | 7 | Rnasel        |
| -0.426693616 | 1 | 0.0013888 | 7 | Paip2         |
| -0.930072673 | 1 | 0.0013994 | 7 | Ngdn          |
| 0.966383077  | 1 | 0.0014231 | 7 | Slco2b1       |
| 0.615999471  | 1 | 0.0014354 | 7 | Hivep2        |
| -2.001790059 | 1 | 0.0014366 | 7 | Nkg7          |
| -0.672278042 | 1 | 0.0014634 | 7 | Bcl2l11       |
| 0.893967456  | 1 | 0.0014789 | 7 | Ppp1r10       |
| -0.60446795  | 1 | 0.0014914 | 7 | Timm13        |
| -1.005924599 | 1 | 0.0015004 | 7 | Clptm1l       |
| -0.638150905 | 1 | 0.001514  | 7 | Tmsb10        |
| 0.793938064  | 1 | 0.0015221 | 7 | Ubtf          |
| -1.575657713 | 1 | 0.0015297 | 7 | Zak           |
| -1.301833788 | 1 | 0.001531  | 7 | Glrx3         |
| -1.08095256  | 1 | 0.0015687 | 7 | Apoa1bp       |
| 0.574643184  | 1 | 0.0015713 | 7 | Hpgd          |
| 0.781678032  | 1 | 0.0015885 | 7 | Gmfg          |
| -0.529534114 | 1 | 0.0016055 | 7 | Psemb1        |
| -1.232208151 | 1 | 0.0016056 | 7 | Plxnc1        |
| 0.470296264  | 1 | 0.0016226 | 7 | Mob3c         |
| 0.999527097  | 1 | 0.0016293 | 7 | Ddx60         |
| -0.607792254 | 1 | 0.0016401 | 7 | Ech1          |
| -1.0331763   | 1 | 0.0016457 | 7 | Csnk2b        |
| -0.918780945 | 1 | 0.0016493 | 7 | R3hdm1        |

|              |   |           |   |           |
|--------------|---|-----------|---|-----------|
| 1.218239524  | 1 | 0.0016777 | 7 | Tmod1     |
| 0.950539084  | 1 | 0.00169   | 7 | Grap      |
| -0.523242231 | 1 | 0.0016911 | 7 | Minos1    |
| -0.606648751 | 1 | 0.0017357 | 7 | Dnm2      |
| -0.502618023 | 1 | 0.0017463 | 7 | Itga6     |
| -1.425323384 | 1 | 0.0017671 | 7 | Gcsh      |
| -0.530195172 | 1 | 0.001785  | 7 | Sirpa     |
| -1.292233567 | 1 | 0.0017888 | 7 | Smc4      |
| -1.573398154 | 1 | 0.0018012 | 7 | Polr2b    |
| 0.679524668  | 1 | 0.0018079 | 7 | Vwa5a     |
| 1.252143664  | 1 | 0.0018149 | 7 | Hmga2-ps1 |
| -0.577021723 | 1 | 0.0018172 | 7 | Pcbp1     |
| -0.806752661 | 1 | 0.0018352 | 7 | Zfand2a   |
| -0.5038257   | 1 | 0.0018472 | 7 | S100a13   |
| -0.75109963  | 1 | 0.0018475 | 7 | Atp8b4    |
| 0.304396186  | 1 | 0.0018498 | 7 | Mir6236   |
| -1.059223512 | 1 | 0.0018663 | 7 | Otud4     |
| -0.865252898 | 1 | 0.0018665 | 7 | Dtx4      |
| -1.087711668 | 1 | 0.0018719 | 7 | Smim11    |
| -0.714522762 | 1 | 0.0018792 | 7 | S100a4    |
| -0.437862429 | 1 | 0.0018946 | 7 | Tmem147   |
| 0.539445473  | 1 | 0.0018948 | 7 | Insig1    |
| -0.741056647 | 1 | 0.0018981 | 7 | Anxa7     |
| -0.526422016 | 1 | 0.0019201 | 7 | Gusb      |
| 0.883031242  | 1 | 0.001939  | 7 | Fcna      |
| -1.483215237 | 1 | 0.0019454 | 7 | Rnf128    |
| -0.450354879 | 1 | 0.0019906 | 7 | Uqcrrs1   |
| -1.206561458 | 1 | 0.0020022 | 7 | Fabp5     |
| 0.78667031   | 1 | 0.0020134 | 7 | Tmem88    |
| -1.532984421 | 1 | 0.0020171 | 7 | Mmp19     |
| -0.723701241 | 1 | 0.0020288 | 7 | Mrpl20    |
| -0.933672766 | 1 | 0.0020316 | 7 | Dap3      |
| -1.044748596 | 1 | 0.0020526 | 7 | Vdac1     |
| -0.287690589 | 1 | 0.002068  | 7 | Gab2      |
| -1.029154605 | 1 | 0.0020837 | 7 | Pstpip1   |
| -0.617066541 | 1 | 0.0021011 | 7 | BC031181  |
| -0.495849811 | 1 | 0.0021217 | 7 | Pttg1ip   |
| -1.315242767 | 1 | 0.0021317 | 7 | Cd300lf   |
| -0.482917925 | 1 | 0.0021361 | 7 | Atp5e     |
| 1.189581843  | 1 | 0.0021386 | 7 | Rsad2     |
| 0.535814048  | 1 | 0.0021399 | 7 | Eif4a1    |
| 0.507185443  | 1 | 0.0021423 | 7 | Sfpq      |
| -0.962789337 | 1 | 0.0021491 | 7 | Prdx6     |
| -1.241071071 | 1 | 0.0021526 | 7 | Atp2b4    |
| -0.701856465 | 1 | 0.0021696 | 7 | Coro1a    |
| -0.890425101 | 1 | 0.0021917 | 7 | Msrbl1    |
| -0.620189313 | 1 | 0.0021929 | 7 | Anp32e    |
| 0.798381759  | 1 | 0.0022067 | 7 | Nme4      |
| 0.788153915  | 1 | 0.0022166 | 7 | Sdc4      |
| 1.105868172  | 1 | 0.0022369 | 7 | Hrh1      |
| -0.403413382 | 1 | 0.0022956 | 7 | Ptk2b     |
| -0.575079777 | 1 | 0.0022958 | 7 | Capg      |
| -1.222357379 | 1 | 0.0023011 | 7 | BC004004  |
| -1.125372443 | 1 | 0.0023047 | 7 | Tmem134   |
| -0.603490441 | 1 | 0.0023292 | 7 | Psmb6     |
| -0.66591051  | 1 | 0.0023381 | 7 | Axl       |
| -0.49309916  | 1 | 0.0023585 | 7 | Capns1    |
| 0.935171454  | 1 | 0.0023629 | 7 | Cxcl3     |
| -0.629061631 | 1 | 0.0023716 | 7 | Cnih1     |
| -0.691252182 | 1 | 0.0023719 | 7 | Smim14    |
| 0.385306607  | 1 | 0.0023856 | 7 | Nr4a1     |

|              |   |           |   |               |
|--------------|---|-----------|---|---------------|
| -1.296019353 | 1 | 0.0024057 | 7 | Pqlc3         |
| -1.174787845 | 1 | 0.0024191 | 7 | Sdhd          |
| -0.601113454 | 1 | 0.0024341 | 7 | Psmc6         |
| -0.936967257 | 1 | 0.0024508 | 7 | Ak2           |
| -0.721020858 | 1 | 0.0024945 | 7 | Rpp21         |
| -1.271935372 | 1 | 0.002508  | 7 | Agpat4        |
| -1.10885709  | 1 | 0.0025124 | 7 | Cox14         |
| -1.309410987 | 1 | 0.0025145 | 7 | Pin1          |
| 0.762703425  | 1 | 0.0025465 | 7 | Ifih1         |
| -0.29071146  | 1 | 0.0025478 | 7 | Cd300a        |
| -1.403030549 | 1 | 0.0025561 | 7 | Gnptg         |
| 0.64948944   | 1 | 0.002568  | 7 | Rtp4          |
| -1.648370038 | 1 | 0.0025891 | 7 | Ict1          |
| -0.975118805 | 1 | 0.0025951 | 7 | Gtf3c2        |
| -0.618421834 | 1 | 0.0026271 | 7 | Selplg        |
| -0.375571401 | 1 | 0.0026294 | 7 | Tgfbr1        |
| 0.454032428  | 1 | 0.0026372 | 7 | Snx3          |
| -0.357280738 | 1 | 0.0026759 | 7 | Ccar1         |
| -0.890100007 | 1 | 0.0026788 | 7 | Nceh1         |
| 0.378503645  | 1 | 0.0026898 | 7 | Cmah          |
| -0.767998442 | 1 | 0.0027204 | 7 | Rnpep         |
| -1.160955525 | 1 | 0.0027245 | 7 | Timm10b       |
| -0.487049162 | 1 | 0.0027358 | 7 | Rbm5          |
| -0.403618441 | 1 | 0.0027402 | 7 | Mrpl52        |
| -0.467431251 | 1 | 0.0027412 | 7 | Tmem123       |
| -0.267126725 | 1 | 0.0027446 | 7 | Eef1a1        |
| -0.488459606 | 1 | 0.0027496 | 7 | Cxcl16        |
| 1.141634287  | 1 | 0.0027526 | 7 | Ppard         |
| -1.459650439 | 1 | 0.0027777 | 7 | Galns         |
| 0.676547637  | 1 | 0.0027795 | 7 | Snx2          |
| -0.390280803 | 1 | 0.0027844 | 7 | Sri           |
| 0.868707756  | 1 | 0.0027894 | 7 | Rapgef2       |
| -0.844899008 | 1 | 0.0027969 | 7 | 2700029M09Rik |
| -0.68571631  | 1 | 0.002801  | 7 | Tnfaip2       |
| 0.670499343  | 1 | 0.002802  | 7 | Tiparp        |
| -0.542571548 | 1 | 0.0028076 | 7 | Tln1          |
| -0.75877823  | 1 | 0.0028456 | 7 | Snapc5        |
| -0.426781999 | 1 | 0.0028491 | 7 | Psmc3         |
| -1.021342739 | 1 | 0.0028608 | 7 | Ubp1          |
| -0.255149007 | 1 | 0.0028653 | 7 | Cops6         |
| -0.911099286 | 1 | 0.0029108 | 7 | Sdf2l1        |
| -0.60894336  | 1 | 0.0029974 | 7 | Scamp3        |
| -0.439099056 | 1 | 0.0030361 | 7 | Rer1          |
| -0.546615208 | 1 | 0.0030534 | 7 | Atp6v1b2      |
| 0.437377104  | 1 | 0.0030665 | 7 | Kmt2e         |
| -0.517327884 | 1 | 0.0030727 | 7 | Nmt1          |
| -1.149729839 | 1 | 0.0030903 | 7 | Wdr74         |
| -1.169652685 | 1 | 0.0031099 | 7 | Lpcat3        |
| -1.172700671 | 1 | 0.0031175 | 7 | Rab4b         |
| -0.976047895 | 1 | 0.0031228 | 7 | Dnajc2        |
| -1.670257959 | 1 | 0.0031262 | 7 | Nes           |
| 1.093130891  | 1 | 0.0031281 | 7 | Gpr34         |
| 0.440978825  | 1 | 0.0031329 | 7 | Fgfr1         |
| 0.677791602  | 1 | 0.0031449 | 7 | Clec10a       |
| -0.689180175 | 1 | 0.0031525 | 7 | Lmo4          |
| -1.217066905 | 1 | 0.0031754 | 7 | Map4k3        |
| -1.521527224 | 1 | 0.0031777 | 7 | Sec13         |
| 0.323025314  | 1 | 0.0031875 | 7 | Lgmn          |
| 0.44734956   | 1 | 0.003202  | 7 | Gp49a         |
| -1.489162977 | 1 | 0.0032216 | 7 | Ddx39         |
| -1.292632498 | 1 | 0.0032477 | 7 | Crnl1         |

|              |   |           |   |          |
|--------------|---|-----------|---|----------|
| -1.356796163 | 1 | 0.0032479 | 7 | Metap1d  |
| -0.444289115 | 1 | 0.0032497 | 7 | Ctsh     |
| -0.362874566 | 1 | 0.0032916 | 7 | Sf3b6    |
| -1.662297158 | 1 | 0.0033125 | 7 | Sorl1    |
| 1.018960929  | 1 | 0.0033573 | 7 | Alox5    |
| -0.559800699 | 1 | 0.003367  | 7 | Gm3258   |
| -0.754914609 | 1 | 0.0033706 | 7 | Tns3     |
| -0.488788463 | 1 | 0.0034129 | 7 | Rab2a    |
| -0.896484221 | 1 | 0.0034323 | 7 | Lpgat1   |
| -1.040101497 | 1 | 0.0034553 | 7 | Leprotl1 |
| 0.936578914  | 1 | 0.0034618 | 7 | Casp4    |
| 0.272247005  | 1 | 0.0034838 | 7 | Clta     |
| -0.646728292 | 1 | 0.0034929 | 7 | Snd1     |
| -0.934883537 | 1 | 0.003502  | 7 | Uqcrc2   |
| -0.986248128 | 1 | 0.0035058 | 7 | Akip1    |
| -0.594405012 | 1 | 0.0035307 | 7 | Fubp1    |
| -0.437480712 | 1 | 0.0035323 | 7 | Tmem66   |
| -1.464007996 | 1 | 0.0036294 | 7 | Chchd3   |
| 0.902308212  | 1 | 0.0036619 | 7 | Mndal    |
| -0.284959682 | 1 | 0.0036875 | 7 | Eif3f    |
| -1.145245911 | 1 | 0.0036914 | 7 | Amdhd2   |
| -1.363801446 | 1 | 0.00371   | 7 | Ddx47    |
| 0.737828449  | 1 | 0.003716  | 7 | Gm6377   |
| -1.105921006 | 1 | 0.0037198 | 7 | Tlk1     |
| -1.463403077 | 1 | 0.0037208 | 7 | Vps4a    |
| -1.336450557 | 1 | 0.0037474 | 7 | Mllt4    |
| -0.827553595 | 1 | 0.0037624 | 7 | Tbc1d10b |
| -0.854937248 | 1 | 0.0037865 | 7 | Paf1     |
| -0.527942951 | 1 | 0.0038041 | 7 | Eif4a3   |
| 0.831773759  | 1 | 0.0038269 | 7 | Kansl1l  |
| -0.801889795 | 1 | 0.0038523 | 7 | Use1     |
| -0.703934162 | 1 | 0.0038781 | 7 | Dtnbp1   |
| -0.643867571 | 1 | 0.0039123 | 7 | Eif3l    |
| 0.437219818  | 1 | 0.003962  | 7 | Ccl6     |
| -0.797244763 | 1 | 0.0040196 | 7 | Psmd3    |
| -1.52835655  | 1 | 0.0040687 | 7 | Cyp4f18  |
| 0.784171453  | 1 | 0.00416   | 7 | Tank     |
| 0.771213687  | 1 | 0.0041725 | 7 | Tlr8     |
| 0.473402683  | 1 | 0.0041791 | 7 | Pag1     |
| -0.274194219 | 1 | 0.0041848 | 7 | Ifi27    |
| -0.727360339 | 1 | 0.0042429 | 7 | Stt3b    |
| -0.415866258 | 1 | 0.0042684 | 7 | Ostf1    |
| -0.888134225 | 1 | 0.0042935 | 7 | Ykt6     |
| -1.569733944 | 1 | 0.0043138 | 7 | Havcr2   |
| -0.628302891 | 1 | 0.0043143 | 7 | Cct3     |
| -1.62143597  | 1 | 0.0043897 | 7 | Cyb5r1   |
| -0.36513933  | 1 | 0.0044057 | 7 | Actr1a   |
| -0.470094748 | 1 | 0.0044474 | 7 | Bola2    |
| 0.994481692  | 1 | 0.0044718 | 7 | Ifi204   |
| -0.704686163 | 1 | 0.0044755 | 7 | Clec4e   |
| -0.74758285  | 1 | 0.004479  | 7 | Pdcd6    |
| -1.424356522 | 1 | 0.0044952 | 7 | Comtd1   |
| -0.52739851  | 1 | 0.0045102 | 7 | Cd44     |
| -0.676281892 | 1 | 0.0045803 | 7 | Irf8     |
| -0.993479238 | 1 | 0.0045829 | 7 | Slc16a3  |
| -0.932960994 | 1 | 0.0046044 | 7 | Golgb1   |
| -0.532507043 | 1 | 0.0046066 | 7 | Hvcn1    |
| -0.598340568 | 1 | 0.0046415 | 7 | Mtpn     |
| -1.151155611 | 1 | 0.0046533 | 7 | Surf2    |
| -0.65387118  | 1 | 0.0046713 | 7 | Hsd17b12 |
| -0.817327545 | 1 | 0.0047075 | 7 | Brd8     |

|              |   |           |   |          |
|--------------|---|-----------|---|----------|
| -1.467542932 | 1 | 0.0047691 | 7 | Abi3     |
| -0.391636203 | 1 | 0.0047708 | 7 | Metap2   |
| -0.264970983 | 1 | 0.0047783 | 7 | Map4k4   |
| -0.480300897 | 1 | 0.0048148 | 7 | Basp1    |
| -1.336490334 | 1 | 0.0048161 | 7 | Sipa1    |
| -1.23353872  | 1 | 0.0048186 | 7 | Thbs1    |
| -0.827659079 | 1 | 0.0048578 | 7 | Pqbp1    |
| 0.537732822  | 1 | 0.0049029 | 7 | Faf1     |
| -0.548087565 | 1 | 0.0049505 | 7 | Tkt      |
| -0.287920226 | 1 | 0.0049854 | 7 | Lair1    |
| -1.124148519 | 1 | 0.0050002 | 7 | Larp1    |
| 0.960122508  | 1 | 0.0050065 | 7 | Tns1     |
| -0.789925686 | 1 | 0.0050498 | 7 | St8sia4  |
| -0.685365652 | 1 | 0.0050595 | 7 | Hsp90aa1 |
| -0.35222439  | 1 | 0.0050784 | 7 | Cyba     |
| -0.802391981 | 1 | 0.0051    | 7 | Ddx42    |
| 0.60245166   | 1 | 0.0051798 | 7 | Jmjd1c   |
| 1.124359806  | 1 | 0.0052051 | 7 | Arid5a   |
| -0.536133355 | 1 | 0.0052067 | 7 | Rac2     |
| 0.307276476  | 1 | 0.0052651 | 7 | Dazap2   |
| -0.47311349  | 1 | 0.0052673 | 7 | Sec61a1  |
| -0.977152831 | 1 | 0.0053472 | 7 | Lman2    |
| 0.860129684  | 1 | 0.0053764 | 7 | Slfn5    |
| -0.444481996 | 1 | 0.0054294 | 7 | Rchy1    |
| -1.199076126 | 1 | 0.0054353 | 7 | Rgcc     |
| -0.269947649 | 1 | 0.0054852 | 7 | Rps14    |
| -0.41733213  | 1 | 0.0054857 | 7 | Akr1a1   |
| 0.971501186  | 1 | 0.0055358 | 7 | Ppm1k    |
| -0.654323044 | 1 | 0.0055627 | 7 | Gpr132   |
| -0.490853913 | 1 | 0.0055823 | 7 | Arf6     |
| -1.258028784 | 1 | 0.0056075 | 7 | Tle1     |
| -1.715788754 | 1 | 0.0056156 | 7 | F10      |
| -0.696532467 | 1 | 0.0056201 | 7 | Mmd      |
| -0.279435308 | 1 | 0.0056286 | 7 | Hnrnpd   |
| -0.551069464 | 1 | 0.0056512 | 7 | Sgk1     |
| 0.515211152  | 1 | 0.0056551 | 7 | Zfand5   |
| -0.291200936 | 1 | 0.0056577 | 7 | Tmem242  |
| -0.892835713 | 1 | 0.0057057 | 7 | Poldip3  |
| -0.446219452 | 1 | 0.0057263 | 7 | Emilin2  |
| -0.802631222 | 1 | 0.0057421 | 7 | Ubalcl1  |
| -0.458973377 | 1 | 0.0057514 | 7 | Ndufa3   |
| -1.153207042 | 1 | 0.0058305 | 7 | Plin3    |
| -0.686962193 | 1 | 0.005879  | 7 | Pdcd6ip  |
| -0.661862458 | 1 | 0.0059027 | 7 | Ssr1     |
| -0.355159233 | 1 | 0.0059146 | 7 | Ifngr2   |
| 0.691704648  | 1 | 0.0059226 | 7 | Rbm47    |
| -0.554497189 | 1 | 0.0059743 | 7 | Eif3i    |
| -1.244373785 | 1 | 0.0060049 | 7 | Ccr2     |
| -0.556286    | 1 | 0.0060144 | 7 | Cox7a2   |
| -0.725565027 | 1 | 0.006049  | 7 | Plbd1    |
| -1.485793181 | 1 | 0.006083  | 7 | Lsm3     |
| 0.704701434  | 1 | 0.0061063 | 7 | Fcgr2b   |
| -1.15841015  | 1 | 0.0061318 | 7 | Ltbp3    |
| -1.438999574 | 1 | 0.006137  | 7 | Ercc1    |
| -0.594676286 | 1 | 0.0061941 | 7 | Tbxas1   |
| -0.475459221 | 1 | 0.0062151 | 7 | Psma1    |
| -0.374452711 | 1 | 0.0062587 | 7 | Rit1     |
| 0.35941542   | 1 | 0.0064058 | 7 | Ahnak    |
| -0.328743145 | 1 | 0.0064084 | 7 | Osbp18   |
| -1.034960834 | 1 | 0.0064264 | 7 | Glt25d1  |
| -0.866373612 | 1 | 0.0064776 | 7 | Lat2     |

|              |   |           |   |               |        |
|--------------|---|-----------|---|---------------|--------|
| -0.417846601 | 1 | 0.0064802 | 7 | Senp2         |        |
| -0.833833687 | 1 | 0.0064922 | 7 | Snx10         |        |
| -0.845506924 | 1 | 0.0064957 | 7 | Gm11974       |        |
| -1.311267371 | 1 | 0.0064972 | 7 | Cisd2         |        |
| -0.500606344 | 1 | 0.0065137 | 7 | Flna          |        |
| -0.57091215  | 1 | 0.0065187 | 7 | Trem2         |        |
| -1.243122127 | 1 | 0.0065289 | 7 | Cyb561d2      |        |
| -0.800026509 | 1 | 0.0066047 | 7 | Dctn4         |        |
| -0.60205535  | 1 | 0.0066083 | 7 | Eif3b         |        |
| -0.527604514 | 1 | 0.006623  | 7 | Psmd8         |        |
| -1.397840014 | 1 | 0.0067291 | 7 | Esf1          |        |
| -1.105682086 | 1 | 0.0068025 | 7 | Camta2        |        |
| -0.872116876 | 1 | 0.0068488 | 7 | Smim3         |        |
| 1.329830468  | 1 | 0.006887  | 7 | Vsig4         |        |
| -0.740467208 | 1 | 0.0069634 | 7 | Snhg1         |        |
| -0.844708597 | 1 | 0.0069705 | 7 | Lims1         |        |
| -0.902762747 | 1 | 0.0069789 | 7 | Mgst1         |        |
| 0.825600406  | 1 | 0.0070178 | 7 | Sorbs3        |        |
| -0.453166591 | 1 | 0.0070192 | 7 | Ndufb3        |        |
| -1.193481065 | 1 | 0.0070349 | 7 | Aebp2         |        |
| -1.202718708 | 1 | 0.0070406 | 7 | Mrps26        |        |
| -0.8950466   | 1 | 0.007077  | 7 | Dennd5a       |        |
| -0.820793213 | 1 | 0.0070855 | 7 | Mrpl17        |        |
| -1.217640144 | 1 | 0.0070999 | 7 | Plekha1       |        |
| 0.297198969  | 1 | 0.0071299 | 7 | Wfdc17        |        |
| 0.664142307  | 1 | 0.0071376 | 7 | Tspan31       |        |
| 0.777719705  | 1 | 0.0071936 | 7 | Cd38          |        |
| -1.073701582 | 1 | 0.0072091 | 7 | Plrg1         |        |
| -0.50056964  | 1 | 0.0072157 | 7 | Xbp1          |        |
| -0.916033548 | 1 | 0.007269  | 7 | Gfpt1         |        |
| -0.786487055 | 1 | 0.0072893 | 7 | Myo1e         |        |
| -1.299187043 | 1 | 0.0073068 | 7 | Cep83         |        |
| -0.2893173   | 1 | 0.0073296 | 7 | Eprs          |        |
| -0.91131186  | 1 | 0.0073394 | 7 | Rab11fip1     |        |
| -0.449975    | 1 | 0.007358  | 7 | Igsf8         |        |
| -0.997988363 | 1 | 0.0073585 | 7 | E430025E21Rik |        |
| -0.764124297 | 1 | 0.0074521 | 7 | Lbr           |        |
| -0.481910813 | 1 | 0.0075035 | 7 | Slc29a3       |        |
| -0.354691789 | 1 | 0.0075135 | 7 | Hp1bp3        |        |
| -1.025354092 | 1 | 0.0076013 | 7 | Uggt1         |        |
| -1.151680623 | 1 | 0.0076875 | 7 | Zbed6         |        |
| -1.377010337 | 1 | 0.0077136 | 7 | Scd1          |        |
| -0.358235949 | 1 | 0.0077139 | 7 |               | Mar.02 |
| -1.106475422 | 1 | 0.007754  | 7 | Gnl1          |        |
| -0.885055525 | 1 | 0.0077615 | 7 | Tmem248       |        |
| -1.365193281 | 1 | 0.0077703 | 7 | Cdk4          |        |
| -0.431453634 | 1 | 0.0077739 | 7 | Psme2b        |        |
| -0.426659351 | 1 | 0.007793  | 7 | Rpl14-ps1     |        |
| -1.815966527 | 1 | 0.0077994 | 7 | Spn           |        |
| -0.982047791 | 1 | 0.0078222 | 7 | Srp19         |        |
| -1.099034999 | 1 | 0.0078403 | 7 | Mak16         |        |
| -0.612055094 | 1 | 0.0078591 | 7 | Esd           |        |
| -1.03542587  | 1 | 0.0078713 | 7 | Elf4          |        |
| -0.512110723 | 1 | 0.0078969 | 7 | Derl1         |        |
| 0.401626332  | 1 | 0.0079049 | 7 | Rnd3          |        |
| -0.272811221 | 1 | 0.0079136 | 7 | Pik3cd        |        |
| -0.76080399  | 1 | 0.0079399 | 7 | Vmp1          |        |
| 0.557115481  | 1 | 0.0079475 | 7 | Fnip1         |        |
| -1.122996298 | 1 | 0.0079821 | 7 | Gtf2h2        |        |
| -1.265041908 | 1 | 0.0080032 | 7 | Apobr         |        |
| -0.422003505 | 1 | 0.0080299 | 7 | Tmem14c       |        |

|              |           |           |   |          |
|--------------|-----------|-----------|---|----------|
| -1.033612289 | 1         | 0.0080314 | 7 | Prkrir   |
| 0.695246302  | 1         | 0.0080591 | 7 | Tcf4     |
| -1.266263656 | 1         | 0.0080702 | 7 | Plcb2    |
| -0.379448742 | 1         | 0.0081412 | 7 | Rab6a    |
| -0.439824716 | 1         | 0.0081591 | 7 | AF251705 |
| -0.990059471 | 1         | 0.0081688 | 7 | Arhgap25 |
| -0.59070138  | 1         | 0.0081811 | 7 | Bcl2l1   |
| -1.14848062  | 1         | 0.0081815 | 7 | Mrpl32   |
| -0.44340787  | 1         | 0.008218  | 7 | Strap    |
| -0.565515729 | 1         | 0.0082411 | 7 | Sin3b    |
| -0.383709941 | 1         | 0.0082515 | 7 | Rassf3   |
| 0.544762226  | 1         | 0.0082672 | 7 | Sema4a   |
| 0.295248216  | 1         | 0.0082785 | 7 | Marcks   |
| -1.173009892 | 1         | 0.0083033 | 7 | Wbp1l    |
| -0.70466177  | 1         | 0.0083603 | 7 | Fyn      |
| -1.22815696  | 1         | 0.0084176 | 7 | Smad4    |
| 1.068440067  | 1         | 0.0084192 | 7 | Serpinb8 |
| 0.326269162  | 1         | 0.0085622 | 7 | Clpp     |
| 1.28585914   | 1         | 0.008609  | 7 | Cyr61    |
| -0.458505441 | 1         | 0.0086374 | 7 | Serp1    |
| -1.088995167 | 1         | 0.008672  | 7 | Cav2     |
| -1.184314827 | 1         | 0.0087097 | 7 | Lnpep    |
| 0.550523255  | 1         | 0.0087195 | 7 | Mgl2     |
| -0.428823098 | 1         | 0.0087216 | 7 | Man2b1   |
| -0.808368045 | 1         | 0.0087625 | 7 | B4galnt1 |
| -0.441799246 | 1         | 0.0088256 | 7 | Ran      |
| -0.393703849 | 1         | 0.0088372 | 7 | Srp14    |
| -0.885159265 | 1         | 0.0088472 | 7 | Abhd5    |
| 0.823779657  | 1         | 0.0088745 | 7 | Abl2     |
| -0.904349734 | 1         | 0.0088869 | 7 | Appl1    |
| 0.285027907  | 1         | 0.0088903 | 7 | App      |
| -0.801537084 | 1         | 0.0089615 | 7 | Rps6kb1  |
| -0.892121019 | 1         | 0.009018  | 7 | Pilra    |
| -1.001407111 | 1         | 0.0091469 | 7 | Ank      |
| -0.500558538 | 1         | 0.0091739 | 7 | H2afy    |
| -1.088134977 | 1         | 0.0091953 | 7 | Cd276    |
| -0.498223687 | 1         | 0.0092392 | 7 | Ankrd13a |
| -0.348351915 | 1         | 0.0092705 | 7 | AW112010 |
| -0.71124838  | 1         | 0.0093056 | 7 | Ndufs7   |
| -1.192527224 | 1         | 0.0093151 | 7 | Cpq      |
| -0.520852724 | 1         | 0.0093426 | 7 | Psma7    |
| -0.636226482 | 1         | 0.0093565 | 7 | Srsf3    |
| -0.341199833 | 1         | 0.0094239 | 7 | Coro1b   |
| -0.39777749  | 1         | 0.0094417 | 7 | Sdc3     |
| -0.693325769 | 1         | 0.0094513 | 7 | Sepr1    |
| -0.568019995 | 1         | 0.0094537 | 7 | Emc1     |
| -1.365724449 | 1         | 0.0095327 | 7 | Igf2r    |
| -0.694725223 | 1         | 0.0095745 | 7 | Tmem126a |
| -1.303651188 | 1         | 0.0096179 | 7 | Isyna1   |
| -0.800925691 | 1         | 0.009661  | 7 | Ptpmt1   |
| -0.418845538 | 1         | 0.0096811 | 7 | Mrpl12   |
| 0.276680143  | 1         | 0.0097388 | 7 | Lilrb4   |
| -1.222150039 | 1         | 0.0097727 | 7 | Ercc6    |
| 1.03713577   | 1         | 0.0098434 | 7 | Tlcd2    |
| -0.275995509 | 1         | 0.0098857 | 7 | Ptprc    |
| -0.598110834 | 1         | 0.0098865 | 7 | Pgls     |
| -0.352950547 | 1         | 0.0099021 | 7 | Chmp3    |
| -0.420043012 | 1         | 0.0099046 | 7 | Soat1    |
| 1.994565199  | 9.55E-125 | 7.15E-129 | 8 | Leprel4  |
| 2.210960677  | 4.61E-123 | 3.45E-127 | 8 | Ramp2    |
| 2.422862263  | 4.37E-115 | 3.28E-119 | 8 | Fbln2    |



|             |           |           |   |          |
|-------------|-----------|-----------|---|----------|
| 3.411462899 | 1.33E-106 | 9.97E-111 | 8 | Ltbp4    |
| 2.017218999 | 5.84E-106 | 4.37E-110 | 8 | Lhfp     |
| 2.137409181 | 1.87E-100 | 1.40E-104 | 8 | AU021092 |
| 1.685912598 | 2.88E-100 | 2.16E-104 | 8 | Tie1     |
| 1.798220907 | 4.57E-97  | 3.42E-101 | 8 | Tshz2    |
| 2.730907071 | 2.90E-93  | 2.17E-97  | 8 | Adh7     |
| 2.132599167 | 3.61E-92  | 2.70E-96  | 8 | Selp     |
| 2.141666889 | 4.54E-91  | 3.40E-95  | 8 | Sulf1    |
| 1.531508348 | 9.21E-91  | 6.90E-95  | 8 | Parm1    |
| 2.507646008 | 1.35E-89  | 1.01E-93  | 8 | Lims2    |
| 3.199058181 | 2.48E-89  | 1.86E-93  | 8 | Bmp4     |
| 2.150703442 | 1.50E-87  | 1.12E-91  | 8 | Gja4     |
| 1.511514227 | 2.73E-86  | 2.04E-90  | 8 | Col4a3   |
| 1.494156562 | 3.58E-82  | 2.68E-86  | 8 | Parva    |
| 1.275655914 | 5.21E-82  | 3.90E-86  | 8 | Twist1   |
| 2.941986373 | 1.99E-80  | 1.49E-84  | 8 | Adh1     |
| 1.581167939 | 2.54E-76  | 1.90E-80  | 8 | Gpr116   |
| 1.862189063 | 2.75E-76  | 2.06E-80  | 8 | Krt18    |
| 1.639045512 | 3.06E-76  | 2.29E-80  | 8 | Phldb2   |
| 2.982250697 | 4.31E-74  | 3.23E-78  | 8 | Ptprb    |
| 2.250589798 | 1.30E-73  | 9.71E-78  | 8 | Ptgis    |
| 2.184613004 | 5.55E-73  | 4.16E-77  | 8 | Fmo1     |
| 1.873428466 | 7.39E-73  | 5.54E-77  | 8 | Tinagl1  |
| 1.513894218 | 1.97E-72  | 1.48E-76  | 8 | Tspan7   |
| 1.786200394 | 9.13E-72  | 6.84E-76  | 8 | Ecscr    |
| 2.143568019 | 1.20E-71  | 8.99E-76  | 8 | Tek      |
| 2.177080011 | 2.24E-71  | 1.68E-75  | 8 | Smoc1    |
| 1.785962352 | 6.61E-70  | 4.95E-74  | 8 | Gkn3     |
| 1.572600412 | 7.43E-70  | 5.57E-74  | 8 | Cdh13    |
| 1.389988072 | 1.79E-69  | 1.34E-73  | 8 | Tspan6   |
| 3.267922669 | 1.62E-68  | 1.21E-72  | 8 | Clu      |
| 1.894449756 | 1.62E-68  | 1.22E-72  | 8 | Msx1     |
| 2.071719496 | 2.28E-68  | 1.71E-72  | 8 | Boc      |
| 1.628034558 | 2.74E-68  | 2.05E-72  | 8 | Car8     |
| 1.599100174 | 2.28E-67  | 1.71E-71  | 8 | Aldh3a1  |
| 1.057969201 | 2.58E-67  | 1.93E-71  | 8 | Pvrl2    |
| 2.477119965 | 3.34E-67  | 2.50E-71  | 8 | Ctgf     |
| 3.191310265 | 4.24E-66  | 3.18E-70  | 8 | Rbp1     |
| 1.385325838 | 1.79E-65  | 1.34E-69  | 8 | Ndn      |
| 1.122035219 | 1.79E-65  | 1.34E-69  | 8 | Npr2     |
| 1.848098888 | 2.30E-65  | 1.72E-69  | 8 | Trabd2b  |
| 1.26253545  | 3.07E-65  | 2.30E-69  | 8 | Bcar1    |
| 1.021198315 | 3.28E-65  | 2.46E-69  | 8 | Exoc3l   |
| 0.938269639 | 9.08E-65  | 6.80E-69  | 8 | Pcdh9    |
| 1.440361582 | 9.09E-65  | 6.81E-69  | 8 | Nanos2   |
| 2.551271327 | 1.13E-64  | 8.50E-69  | 8 | Emcn     |
| 1.867523553 | 1.18E-64  | 8.86E-69  | 8 | Ephx2    |
| 3.909848884 | 2.33E-64  | 1.74E-68  | 8 | Cytl1    |
| 2.064471313 | 2.54E-64  | 1.90E-68  | 8 | Gpr4     |
| 1.730812507 | 5.76E-64  | 4.31E-68  | 8 | Lmcd1    |
| 2.866997986 | 2.18E-62  | 1.64E-66  | 8 | Sfrp1    |
| 1.581167939 | 8.02E-62  | 6.00E-66  | 8 | Pkhd1l1  |
| 2.05666445  | 1.19E-61  | 8.88E-66  | 8 | Egfl7    |
| 2.073273278 | 8.52E-61  | 6.38E-65  | 8 | Wnk4     |
| 1.115540207 | 1.47E-60  | 1.10E-64  | 8 | Sardh    |
| 1.019715139 | 3.92E-59  | 2.94E-63  | 8 | Pla2g5   |
| 2.631600256 | 6.14E-58  | 4.60E-62  | 8 | Mmrn2    |
| 1.886684233 | 6.29E-58  | 4.71E-62  | 8 | Fermt2   |
| 0.993654052 | 4.37E-57  | 3.28E-61  | 8 | Wipf3    |
| 1.667216389 | 4.56E-57  | 3.41E-61  | 8 | Clec14a  |
| 0.982104357 | 6.96E-57  | 5.21E-61  | 8 | Gpam     |

|             |          |          |   |               |
|-------------|----------|----------|---|---------------|
| 1.162644376 | 7.56E-57 | 5.67E-61 | 8 | 2900041M22Rik |
| 2.264115754 | 1.30E-56 | 9.73E-61 | 8 | Pcolce2       |
| 1.134979933 | 2.50E-56 | 1.87E-60 | 8 | Tmod2         |
| 1.856196883 | 3.52E-54 | 2.63E-58 | 8 | 1500015O10Rik |
| 1.005325468 | 7.56E-54 | 5.66E-58 | 8 | Ugt8a         |
| 1.429759073 | 1.18E-53 | 8.86E-58 | 8 | Nnmt          |
| 0.983248365 | 2.07E-53 | 1.55E-57 | 8 | 1700030C10Rik |
| 1.757972127 | 3.30E-53 | 2.47E-57 | 8 | Jam2          |
| 1.506234544 | 4.60E-53 | 3.44E-57 | 8 | Mtap7d3       |
| 1.485857759 | 5.07E-53 | 3.80E-57 | 8 | Smtnl2        |
| 1.271305924 | 5.26E-53 | 3.94E-57 | 8 | Ddah1         |
| 1.273745694 | 1.02E-52 | 7.62E-57 | 8 | Irf6          |
| 1.576752125 | 1.16E-52 | 8.65E-57 | 8 | Cnn3          |
| 0.992686466 | 5.80E-51 | 4.34E-55 | 8 | Cdc42ep5      |
| 2.232890406 | 7.37E-51 | 5.52E-55 | 8 | Aldh1a1       |
| 0.918837577 | 7.82E-51 | 5.85E-55 | 8 | Myzap         |
| 0.937301116 | 9.20E-49 | 6.89E-53 | 8 | Cyp4b1        |
| 0.862077694 | 9.20E-49 | 6.89E-53 | 8 | Gdf6          |
| 3.623339186 | 1.56E-48 | 1.17E-52 | 8 | Tm4sf1        |
| 2.347851572 | 3.06E-48 | 2.29E-52 | 8 | Frzb          |
| 1.499437017 | 1.47E-47 | 1.10E-51 | 8 | Snora68       |
| 1.265608566 | 6.12E-46 | 4.58E-50 | 8 | Rps6kl1       |
| 1.787920693 | 1.08E-45 | 8.10E-50 | 8 | BC100451      |
| 1.64343971  | 5.56E-45 | 4.17E-49 | 8 | Lox           |
| 1.375837596 | 1.04E-44 | 7.78E-49 | 8 | Il9r          |
| 1.353611714 | 1.31E-44 | 9.83E-49 | 8 | Gnmt          |
| 1.145339967 | 1.35E-44 | 1.01E-48 | 8 | Ncam1         |
| 1.844076073 | 1.38E-44 | 1.03E-48 | 8 | Eln           |
| 1.624025172 | 1.44E-44 | 1.08E-48 | 8 | Tlcd1         |
| 2.553811475 | 5.96E-44 | 4.46E-48 | 8 | Ace           |
| 0.793270123 | 1.13E-42 | 8.45E-47 | 8 | Tead2         |
| 1.516509001 | 4.66E-42 | 3.49E-46 | 8 | Tmtc1         |
| 1.120987991 | 5.44E-42 | 4.08E-46 | 8 | Notch4        |
| 1.106923061 | 8.89E-42 | 6.66E-46 | 8 | Tcf7l1        |
| 1.319325782 | 9.09E-42 | 6.81E-46 | 8 | Ston1         |
| 2.175502191 | 1.09E-41 | 8.13E-46 | 8 | Nedd4         |
| 1.526715435 | 6.50E-41 | 4.87E-45 | 8 | Adcy4         |
| 1.564728834 | 1.18E-40 | 8.81E-45 | 8 | Prex2         |
| 1.394851317 | 1.55E-40 | 1.16E-44 | 8 | Foxc1         |
| 2.476635304 | 3.22E-40 | 2.41E-44 | 8 | Timp3         |
| 1.858813276 | 1.41E-38 | 1.06E-42 | 8 | Efna5         |
| 1.932172128 | 1.82E-38 | 1.37E-42 | 8 | Spon1         |
| 1.003394965 | 3.86E-38 | 2.89E-42 | 8 | Ushbp1        |
| 1.039285433 | 4.15E-38 | 3.11E-42 | 8 | Hoxa5         |
| 0.833849355 | 4.76E-38 | 3.56E-42 | 8 | Mn1           |
| 2.490597974 | 5.25E-38 | 3.93E-42 | 8 | Ccdc80        |
| 2.500720518 | 5.96E-38 | 4.46E-42 | 8 | Sod3          |
| 0.839604517 | 7.13E-38 | 5.34E-42 | 8 | Fam109b       |
| 0.929748887 | 7.86E-38 | 5.89E-42 | 8 | Ntn4          |
| 1.598365173 | 1.08E-37 | 8.12E-42 | 8 | Rab4a         |
| 1.541432804 | 1.99E-37 | 1.49E-41 | 8 | Klk8          |
| 2.147678028 | 3.37E-37 | 2.53E-41 | 8 | Cyp1b1        |
| 3.246086822 | 3.69E-37 | 2.77E-41 | 8 | Bgn           |
| 1.736761862 | 9.12E-37 | 6.83E-41 | 8 | Fbln5         |
| 1.434206058 | 9.89E-37 | 7.40E-41 | 8 | Gata6         |
| 2.39206954  | 1.03E-36 | 7.75E-41 | 8 | Pecam1        |
| 1.711611537 | 1.92E-36 | 1.44E-40 | 8 | Pdgfrb        |
| 1.956092629 | 2.43E-35 | 1.82E-39 | 8 | Prelp         |
| 1.585268039 | 3.14E-35 | 2.35E-39 | 8 | Osbpl5        |
| 1.811992354 | 1.65E-34 | 1.23E-38 | 8 | Col5a2        |
| 0.889949399 | 2.64E-34 | 1.97E-38 | 8 | Plvap         |

|             |          |          |   |               |
|-------------|----------|----------|---|---------------|
| 1.210189378 | 2.64E-34 | 1.97E-38 | 8 | Megf6         |
| 0.932472521 | 2.90E-34 | 2.17E-38 | 8 | Rasgrf2       |
| 0.862211742 | 4.13E-34 | 3.09E-38 | 8 | Slc4a3        |
| 1.040727395 | 4.23E-34 | 3.17E-38 | 8 | Fzd6          |
| 0.845044241 | 5.43E-34 | 4.07E-38 | 8 | Tcte2         |
| 3.22320969  | 1.08E-33 | 8.08E-38 | 8 | Cpe           |
| 2.227245648 | 1.41E-33 | 1.05E-37 | 8 | Sdpr          |
| 2.078611322 | 1.41E-33 | 1.06E-37 | 8 | Mxra8         |
| 1.57982902  | 1.65E-33 | 1.24E-37 | 8 | Sh3d21        |
| 2.215370924 | 1.22E-32 | 9.16E-37 | 8 | Fxyd6         |
| 1.492231633 | 1.59E-32 | 1.19E-36 | 8 | Zfp423        |
| 2.455069594 | 2.34E-32 | 1.75E-36 | 8 | Mmp2          |
| 1.107738105 | 4.36E-32 | 3.26E-36 | 8 | Ephb4         |
| 1.247360043 | 4.61E-32 | 3.45E-36 | 8 | Mcc           |
| 1.459264584 | 5.52E-32 | 4.13E-36 | 8 | Msrb3         |
| 0.951232821 | 5.87E-31 | 4.40E-35 | 8 | Bmx           |
| 0.992401461 | 5.87E-31 | 4.40E-35 | 8 | She           |
| 1.037882442 | 6.33E-31 | 4.74E-35 | 8 | Baiap3        |
| 2.532316952 | 1.07E-30 | 8.03E-35 | 8 | Edn1          |
| 1.42494459  | 2.73E-30 | 2.05E-34 | 8 | Tmem204       |
| 1.541809243 | 3.17E-30 | 2.38E-34 | 8 | Wwtr1         |
| 1.582528946 | 6.22E-30 | 4.66E-34 | 8 | Sox5          |
| 0.776761849 | 1.09E-29 | 8.16E-34 | 8 | Fxyd7         |
| 1.359114032 | 1.89E-29 | 1.42E-33 | 8 | Card10        |
| 0.971794748 | 4.53E-29 | 3.39E-33 | 8 | Hap1          |
| 1.364801177 | 2.08E-28 | 1.56E-32 | 8 | Zfp507        |
| 1.985005163 | 2.13E-28 | 1.59E-32 | 8 | Cdc42bpa      |
| 1.176995245 | 3.03E-28 | 2.27E-32 | 8 | Pdzk1ip1      |
| 1.241741084 | 3.03E-28 | 2.27E-32 | 8 | Gata2         |
| 1.361221943 | 3.28E-28 | 2.46E-32 | 8 | Foxc2         |
| 1.169683731 | 3.84E-28 | 2.88E-32 | 8 | Cdh5          |
| 0.819294708 | 5.28E-28 | 3.96E-32 | 8 | Kcnt2         |
| 1.236946243 | 6.65E-28 | 4.98E-32 | 8 | Grb10         |
| 2.21309258  | 1.30E-27 | 9.71E-32 | 8 | Nfib          |
| 1.821294747 | 2.06E-27 | 1.54E-31 | 8 | Meg3          |
| 1.078467723 | 4.95E-27 | 3.71E-31 | 8 | Oxld1         |
| 1.917855883 | 6.66E-27 | 4.98E-31 | 8 | C230052I12Rik |
| 1.432007868 | 9.09E-27 | 6.81E-31 | 8 | Rasip1        |
| 1.49216333  | 2.14E-26 | 1.60E-30 | 8 | Aph1b         |
| 1.126820919 | 4.01E-26 | 3.00E-30 | 8 | Hid1          |
| 1.354530831 | 5.43E-26 | 4.07E-30 | 8 | Ppap2a        |
| 1.72313876  | 5.47E-26 | 4.09E-30 | 8 | Hspg2         |
| 0.933490706 | 6.65E-26 | 4.98E-30 | 8 | 9930014A18Rik |
| 1.373782742 | 8.63E-26 | 6.46E-30 | 8 | S100a16       |
| 1.346493142 | 1.22E-25 | 9.11E-30 | 8 | 1700056E22Rik |
| 0.926241971 | 2.25E-25 | 1.68E-29 | 8 | Acer2         |
| 2.352970678 | 4.43E-25 | 3.32E-29 | 8 | Sparc         |
| 1.527573946 | 1.31E-24 | 9.80E-29 | 8 | Cdc42ep2      |
| 2.21650175  | 4.24E-24 | 3.17E-28 | 8 | Pam           |
| 2.208985083 | 6.07E-24 | 4.55E-28 | 8 | Dos           |
| 1.753787767 | 6.32E-24 | 4.74E-28 | 8 | Itgae         |
| 1.755642958 | 2.47E-23 | 1.85E-27 | 8 | Tmem158       |
| 1.192972834 | 2.94E-23 | 2.20E-27 | 8 | Adat2         |
| 2.705471234 | 5.78E-23 | 4.33E-27 | 8 | Mgp           |
| 2.636013803 | 6.09E-23 | 4.56E-27 | 8 | Vwf           |
| 1.486777783 | 6.17E-23 | 4.62E-27 | 8 | Stard13       |
| 1.141446702 | 6.55E-23 | 4.90E-27 | 8 | Lysmd2        |
| 1.116799942 | 7.36E-23 | 5.52E-27 | 8 | Spns2         |
| 1.87496869  | 1.07E-22 | 7.98E-27 | 8 | A630089N07Rik |
| 0.707198934 | 1.18E-22 | 8.82E-27 | 8 | Adcy6         |
| 1.653055168 | 1.37E-22 | 1.03E-26 | 8 | Ece1          |

|             |          |          |   |               |
|-------------|----------|----------|---|---------------|
| 2.07367058  | 2.13E-22 | 1.59E-26 | 8 | Mfap5         |
| 1.933447044 | 3.58E-22 | 2.68E-26 | 8 | Antxr1        |
| 1.201860871 | 3.71E-22 | 2.78E-26 | 8 | Zscan18       |
| 1.414679237 | 3.88E-22 | 2.91E-26 | 8 | Tenc1         |
| 2.564915751 | 3.97E-22 | 2.97E-26 | 8 | Fstl1         |
| 1.294189129 | 6.52E-22 | 4.88E-26 | 8 | Dyrk1b        |
| 1.205154462 | 6.58E-22 | 4.93E-26 | 8 | Dsel          |
| 0.61319863  | 6.61E-22 | 4.95E-26 | 8 | Ehd2          |
| 1.125877212 | 8.50E-22 | 6.36E-26 | 8 | Tex14         |
| 2.709984885 | 1.17E-21 | 8.76E-26 | 8 | Igfbp7        |
| 1.125299022 | 1.34E-21 | 1.00E-25 | 8 | 2510002D24Rik |
| 1.975656811 | 2.82E-21 | 2.11E-25 | 8 | Icam2         |
| 1.420680915 | 4.02E-21 | 3.01E-25 | 8 | Gtf2ird2      |
| 1.571626685 | 4.55E-21 | 3.41E-25 | 8 | Lamb2         |
| 1.515846969 | 6.21E-21 | 4.65E-25 | 8 | D3Ertd254e    |
| 1.811464086 | 2.06E-20 | 1.54E-24 | 8 | Gstt1         |
| 0.529901771 | 3.02E-20 | 2.26E-24 | 8 | Inca1         |
| 1.841075501 | 3.08E-20 | 2.31E-24 | 8 | Fxyd1         |
| 1.342651824 | 3.15E-20 | 2.36E-24 | 8 | 9430020K01Rik |
| 0.631741156 | 3.33E-20 | 2.49E-24 | 8 | Cdon          |
| 1.19985177  | 4.56E-20 | 3.41E-24 | 8 | BC051142      |
| 1.400790847 | 4.93E-20 | 3.69E-24 | 8 | Smad6         |
| 1.529128807 | 6.27E-20 | 4.70E-24 | 8 | Sorbs1        |
| 1.232117726 | 7.91E-20 | 5.93E-24 | 8 | Gbp4          |
| 1.039986928 | 9.28E-20 | 6.95E-24 | 8 | A530099J19Rik |
| 1.576848741 | 1.09E-19 | 8.15E-24 | 8 | Synpo         |
| 1.871889515 | 1.29E-19 | 9.67E-24 | 8 | Lpar1         |
| 2.059591743 | 2.16E-19 | 1.62E-23 | 8 | Fhl1          |
| 1.029277478 | 3.64E-19 | 2.72E-23 | 8 | Nadk2         |
| 2.01766279  | 3.82E-19 | 2.86E-23 | 8 | Lphn1         |
| 0.65822402  | 4.22E-19 | 3.16E-23 | 8 | Nek8          |
| 1.987867816 | 5.62E-19 | 4.21E-23 | 8 | Cav1          |
| 1.336155439 | 6.37E-19 | 4.77E-23 | 8 | Magee1        |
| 0.816526202 | 8.61E-19 | 6.45E-23 | 8 | Plat          |
| 1.864364262 | 1.01E-18 | 7.57E-23 | 8 | Ptrf          |
| 0.845526175 | 2.37E-18 | 1.78E-22 | 8 | E130311K13Rik |
| 1.275998698 | 2.81E-18 | 2.10E-22 | 8 | Tanc1         |
| 1.649420744 | 3.10E-18 | 2.32E-22 | 8 | Gid4          |
| 1.972851125 | 4.22E-18 | 3.16E-22 | 8 | Cgnl1         |
| 1.021401216 | 4.41E-18 | 3.30E-22 | 8 | 2810001G20Rik |
| 1.626419818 | 5.49E-18 | 4.11E-22 | 8 | Pcdh19        |
| 1.122659448 | 5.85E-18 | 4.38E-22 | 8 | Gm5512        |
| 0.783535489 | 5.88E-18 | 4.40E-22 | 8 | Znrd1as       |
| 1.206659774 | 1.87E-17 | 1.40E-21 | 8 | Dock6         |
| 0.787768229 | 1.95E-17 | 1.46E-21 | 8 | Mxra7         |
| 0.765948727 | 2.05E-17 | 1.54E-21 | 8 | Gm527         |
| 0.976356223 | 2.39E-17 | 1.79E-21 | 8 | Bicd1         |
| 0.686718037 | 2.41E-17 | 1.81E-21 | 8 | Abca8b        |
| 1.039986928 | 3.08E-17 | 2.30E-21 | 8 | Top1mt        |
| 1.408165107 | 3.60E-17 | 2.69E-21 | 8 | Ablim1        |
| 1.750342534 | 3.98E-17 | 2.98E-21 | 8 | Nfia          |
| 1.238641046 | 4.32E-17 | 3.24E-21 | 8 | Tacc2         |
| 1.365677986 | 4.56E-17 | 3.42E-21 | 8 | Pop1          |
| 1.350482928 | 7.35E-17 | 5.51E-21 | 8 | Rab26os       |
| 1.137700431 | 7.67E-17 | 5.75E-21 | 8 | Adm           |
| 1.123706508 | 8.78E-17 | 6.57E-21 | 8 | Ears2         |
| 1.703401303 | 9.25E-17 | 6.92E-21 | 8 | Htra1         |
| 0.896848906 | 1.50E-16 | 1.12E-20 | 8 | Nr3c2         |
| 1.342950632 | 1.71E-16 | 1.28E-20 | 8 | Endog         |
| 1.234479597 | 2.65E-16 | 1.98E-20 | 8 | Xcl1          |
| 1.452423052 | 3.03E-16 | 2.27E-20 | 8 | Snora78       |

|             |          |          |   |               |
|-------------|----------|----------|---|---------------|
| 1.032647252 | 4.55E-16 | 3.41E-20 | 8 | Sox7          |
| 0.645343799 | 5.07E-16 | 3.80E-20 | 8 | Spaca6        |
| 2.006467921 | 5.74E-16 | 4.30E-20 | 8 | Slc43a3       |
| 1.648750278 | 9.59E-16 | 7.18E-20 | 8 | Adamts1       |
| 1.175752237 | 1.13E-15 | 8.43E-20 | 8 | 4933433G15Rik |
| 0.733627236 | 1.29E-15 | 9.66E-20 | 8 | Ajuba         |
| 1.18826987  | 1.38E-15 | 1.03E-19 | 8 | Polr3g        |
| 0.941298414 | 1.54E-15 | 1.16E-19 | 8 | Itga1         |
| 2.785854621 | 1.74E-15 | 1.31E-19 | 8 | Dcn           |
| 1.470643599 | 1.76E-15 | 1.32E-19 | 8 | Cald1         |
| 1.104689181 | 2.82E-15 | 2.11E-19 | 8 | Pik3ip1       |
| 1.149293775 | 3.65E-15 | 2.73E-19 | 8 | Bcdin3d       |
| 1.887691644 | 4.24E-15 | 3.18E-19 | 8 | Xcr1          |
| 1.369975982 | 6.96E-15 | 5.21E-19 | 8 | Mrpl49        |
| 1.147146672 | 8.15E-15 | 6.10E-19 | 8 | Klhl2         |
| 1.235787977 | 4.59E-14 | 3.44E-18 | 8 | Ccdc102a      |
| 1.396044759 | 4.87E-14 | 3.65E-18 | 8 | Zfp664        |
| 1.067538652 | 6.46E-14 | 4.84E-18 | 8 | Gm14403       |
| 1.084640582 | 8.71E-14 | 6.52E-18 | 8 | Smarcd3       |
| 1.833122961 | 9.28E-14 | 6.95E-18 | 8 | Mical2        |
| 1.549655485 | 1.13E-13 | 8.44E-18 | 8 | Cyr61         |
| 1.643944633 | 1.25E-13 | 9.37E-18 | 8 | Ctla2a        |
| 1.405517039 | 1.28E-13 | 9.61E-18 | 8 | Rhbdd2        |
| 1.055959982 | 1.51E-13 | 1.13E-17 | 8 | Pdia5         |
| 0.876399403 | 2.39E-13 | 1.79E-17 | 8 | Palm          |
| 0.681343551 | 2.40E-13 | 1.79E-17 | 8 | Ggnbp1        |
| 1.011156193 | 2.55E-13 | 1.91E-17 | 8 | Asap2         |
| 1.860174604 | 2.85E-13 | 2.14E-17 | 8 | Ift27         |
| 1.421659316 | 3.18E-13 | 2.38E-17 | 8 | Otud7b        |
| 1.070111128 | 4.59E-13 | 3.44E-17 | 8 | Bbs4          |
| 0.872846522 | 5.12E-13 | 3.83E-17 | 8 | Slc9a3r2      |
| 0.937870009 | 5.13E-13 | 3.84E-17 | 8 | Amotl2        |
| 1.323968181 | 6.01E-13 | 4.50E-17 | 8 | Elp4          |
| 1.704513157 | 6.21E-13 | 4.65E-17 | 8 | Fosl1         |
| 0.640764364 | 7.20E-13 | 5.39E-17 | 8 | Rab19         |
| 0.892635205 | 7.44E-13 | 5.57E-17 | 8 | 2310022B05Rik |
| 1.385337227 | 8.44E-13 | 6.32E-17 | 8 | Epn2          |
| 0.604102987 | 9.33E-13 | 6.99E-17 | 8 | Slc19a2       |
| 1.13655692  | 1.21E-12 | 9.04E-17 | 8 | Pigc          |
| 1.609417655 | 1.26E-12 | 9.41E-17 | 8 | Rhbdf1        |
| 1.138730187 | 1.69E-12 | 1.26E-16 | 8 | Megf8         |
| 0.631660045 | 1.81E-12 | 1.36E-16 | 8 | Marveld2      |
| 1.075364539 | 2.34E-12 | 1.76E-16 | 8 | Plekhh3       |
| 0.965570517 | 2.41E-12 | 1.80E-16 | 8 | Hepacam2      |
| 1.528794424 | 2.50E-12 | 1.87E-16 | 8 | Nxn           |
| 1.500356558 | 2.65E-12 | 1.99E-16 | 8 | Cd200         |
| 0.89582966  | 2.96E-12 | 2.22E-16 | 8 | E130012A19Rik |
| 0.846949084 | 3.32E-12 | 2.49E-16 | 8 | Hoxb3         |
| 1.161237457 | 3.38E-12 | 2.53E-16 | 8 | Cdc23         |
| 1.426972013 | 3.59E-12 | 2.69E-16 | 8 | Alkbh6        |
| 1.289839664 | 3.61E-12 | 2.70E-16 | 8 | Gem           |
| 0.891122177 | 6.24E-12 | 4.67E-16 | 8 | Nr4a3         |
| 0.937909792 | 9.41E-12 | 7.05E-16 | 8 | Rab11fip2     |
| 1.019093613 | 1.12E-11 | 8.36E-16 | 8 | Klhl24        |
| 1.27600681  | 1.22E-11 | 9.13E-16 | 8 | Hebp2         |
| 0.747214402 | 1.24E-11 | 9.29E-16 | 8 | Ints2         |
| 1.063894454 | 1.51E-11 | 1.13E-15 | 8 | Tctn3         |
| 1.499917902 | 1.98E-11 | 1.48E-15 | 8 | Areg          |
| 0.866670348 | 2.00E-11 | 1.49E-15 | 8 | 6720489N17Rik |
| 1.499737543 | 2.59E-11 | 1.94E-15 | 8 | 2900026A02Rik |
| 1.290401133 | 2.77E-11 | 2.07E-15 | 8 | Spef1         |

|             |          |          |   |               |
|-------------|----------|----------|---|---------------|
| 1.252513679 | 2.86E-11 | 2.14E-15 | 8 | Pcnx          |
| 1.619274179 | 2.87E-11 | 2.15E-15 | 8 | Vcam1         |
| 0.874972964 | 3.32E-11 | 2.49E-15 | 8 | Dbt           |
| 1.382880223 | 4.61E-11 | 3.45E-15 | 8 | Tagln         |
| 1.245188862 | 4.94E-11 | 3.70E-15 | 8 | Tpgs2         |
| 1.496254028 | 5.14E-11 | 3.85E-15 | 8 | Ifi205        |
| 0.828008361 | 5.66E-11 | 4.24E-15 | 8 | Lcor          |
| 1.313734647 | 5.99E-11 | 4.49E-15 | 8 | Tbc1d10c      |
| 1.749787783 | 6.36E-11 | 4.76E-15 | 8 | Nbeal1        |
| 1.334871525 | 6.67E-11 | 5.00E-15 | 8 | Rad52         |
| 0.508743545 | 6.90E-11 | 5.17E-15 | 8 | Gpr82         |
| 0.936385209 | 8.60E-11 | 6.44E-15 | 8 | Abi2          |
| 1.093877787 | 1.06E-10 | 7.96E-15 | 8 | Homer3        |
| 1.1695359   | 1.11E-10 | 8.30E-15 | 8 | Leprel2       |
| 1.199842599 | 1.27E-10 | 9.48E-15 | 8 | Ifit1         |
| 1.400131729 | 1.30E-10 | 9.76E-15 | 8 | Fbxo25        |
| 1.336312598 | 1.31E-10 | 9.80E-15 | 8 | Dpysl3        |
| 0.785032998 | 1.74E-10 | 1.31E-14 | 8 | Acyp1         |
| 0.928661581 | 1.79E-10 | 1.34E-14 | 8 | B3gnt7        |
| 1.097245234 | 1.88E-10 | 1.41E-14 | 8 | Ttc38         |
| 0.53027849  | 1.97E-10 | 1.48E-14 | 8 | Ildr1         |
| 0.785644251 | 2.03E-10 | 1.52E-14 | 8 | Htra4         |
| 1.067682313 | 2.43E-10 | 1.82E-14 | 8 | Tmem9         |
| 1.235556221 | 2.71E-10 | 2.03E-14 | 8 | Acsf3         |
| 1.177022025 | 2.94E-10 | 2.20E-14 | 8 | Taf4b         |
| 0.812764557 | 3.62E-10 | 2.71E-14 | 8 | D3Erttd751e   |
| 0.899318163 | 5.22E-10 | 3.91E-14 | 8 | Plxdc2        |
| 0.937779425 | 5.22E-10 | 3.91E-14 | 8 | Phykpl        |
| 1.273040469 | 5.96E-10 | 4.47E-14 | 8 | Gng11         |
| 0.778227473 | 9.53E-10 | 7.14E-14 | 8 | Myom1         |
| 0.995297297 | 1.01E-09 | 7.59E-14 | 8 | Slc2a4rg-ps   |
| 1.276063713 | 1.11E-09 | 8.28E-14 | 8 | Mta1          |
| 0.806900375 | 1.17E-09 | 8.77E-14 | 8 | Cryzl1        |
| 1.436436328 | 1.20E-09 | 8.98E-14 | 8 | Epas1         |
| 0.770376778 | 1.32E-09 | 9.86E-14 | 8 | Naip6         |
| 0.959839735 | 1.34E-09 | 1.00E-13 | 8 | Zfp518b       |
| 1.160076601 | 1.39E-09 | 1.04E-13 | 8 | Golim4        |
| 0.797373909 | 1.59E-09 | 1.19E-13 | 8 | Map6          |
| 1.141532094 | 1.72E-09 | 1.29E-13 | 8 | Trim62        |
| 1.518600816 | 1.73E-09 | 1.30E-13 | 8 | Syne2         |
| 0.999043417 | 1.74E-09 | 1.30E-13 | 8 | Ikbip         |
| 0.980829253 | 1.83E-09 | 1.37E-13 | 8 | Zdhhc24       |
| 1.420734058 | 1.86E-09 | 1.39E-13 | 8 | Arl16         |
| 0.90954287  | 1.98E-09 | 1.48E-13 | 8 | Rab33b        |
| 0.515859414 | 2.88E-09 | 2.16E-13 | 8 | Mr1           |
| 0.415352829 | 2.95E-09 | 2.21E-13 | 8 | Sipa1l2       |
| 0.826014342 | 3.25E-09 | 2.43E-13 | 8 | Slc40a1       |
| 1.572817329 | 3.51E-09 | 2.63E-13 | 8 | Mfsd3         |
| 0.806482417 | 3.52E-09 | 2.63E-13 | 8 | Fam53a        |
| 0.879327919 | 3.52E-09 | 2.63E-13 | 8 | Sel1l3        |
| 0.764489405 | 3.54E-09 | 2.65E-13 | 8 | Ifng          |
| 0.862341744 | 3.88E-09 | 2.91E-13 | 8 | Sgce          |
| 0.742245267 | 4.00E-09 | 3.00E-13 | 8 | Gzma          |
| 0.655687759 | 4.49E-09 | 3.36E-13 | 8 | Ccdc137       |
| 0.820780758 | 5.67E-09 | 4.25E-13 | 8 | Zfp120        |
| 1.255778307 | 5.96E-09 | 4.47E-13 | 8 | Kdelc2        |
| 0.967890071 | 6.67E-09 | 4.99E-13 | 8 | Mrpl9         |
| 0.570723765 | 7.86E-09 | 5.89E-13 | 8 | 6530402F18Rik |
| 0.922487216 | 9.10E-09 | 6.81E-13 | 8 | Sdcbp2        |
| 1.091981442 | 9.59E-09 | 7.18E-13 | 8 | Cyth3         |
| 0.634576651 | 1.03E-08 | 7.70E-13 | 8 | Zgpat         |

|             |          |          |   |               |        |
|-------------|----------|----------|---|---------------|--------|
| 1.058679883 | 1.11E-08 | 8.34E-13 | 8 | B3glct        |        |
| 0.906096497 | 1.46E-08 | 1.10E-12 | 8 | Usp53         |        |
| 0.898853473 | 1.47E-08 | 1.10E-12 | 8 | Rnase6        |        |
| 1.264914787 | 1.54E-08 | 1.15E-12 | 8 | Zbtb22        |        |
| 0.936558064 | 1.84E-08 | 1.38E-12 | 8 | Gpr160        |        |
| 1.291584052 | 1.93E-08 | 1.45E-12 | 8 | Zfp26         |        |
| 1.315079491 | 1.98E-08 | 1.48E-12 | 8 | Cycs          |        |
| 0.997526011 | 1.99E-08 | 1.49E-12 | 8 | Id1           |        |
| 0.829335447 | 2.06E-08 | 1.54E-12 | 8 | Med16         |        |
| 0.927318546 | 2.12E-08 | 1.59E-12 | 8 | Eva1b         |        |
| 1.29497415  | 2.17E-08 | 1.62E-12 | 8 | Mrps11        |        |
| 1.177972979 | 2.38E-08 | 1.78E-12 | 8 | Bpgm          |        |
| 1.720994912 | 2.47E-08 | 1.85E-12 | 8 | Serpinh1      |        |
| 1.181857794 | 2.58E-08 | 1.93E-12 | 8 | Dcp1b         |        |
| 1.630986249 | 2.85E-08 | 2.13E-12 | 8 | Bphl          |        |
| 0.586633576 | 2.95E-08 | 2.21E-12 | 8 | Gins4         |        |
| 0.848704066 | 3.29E-08 | 2.46E-12 | 8 |               | Mar.07 |
| 0.908981932 | 3.42E-08 | 2.56E-12 | 8 | Gimap4        |        |
| 0.73419126  | 3.99E-08 | 2.99E-12 | 8 | Gzmb          |        |
| 0.971298888 | 4.62E-08 | 3.46E-12 | 8 | Bcs1l         |        |
| 0.461582527 | 4.73E-08 | 3.54E-12 | 8 | Ifi44         |        |
| 1.18546624  | 4.88E-08 | 3.65E-12 | 8 | Cox18         |        |
| 0.918325413 | 5.27E-08 | 3.95E-12 | 8 | Pak4          |        |
| 0.944800911 | 5.42E-08 | 4.06E-12 | 8 | Pex14         |        |
| 0.840887264 | 5.83E-08 | 4.37E-12 | 8 | Grpel2        |        |
| 1.111765417 | 6.14E-08 | 4.60E-12 | 8 | Slc39a14      |        |
| 0.957282166 | 6.82E-08 | 5.11E-12 | 8 | Rcn3          |        |
| 1.266295535 | 7.05E-08 | 5.28E-12 | 8 | Ly6a          |        |
| 1.12990562  | 7.45E-08 | 5.58E-12 | 8 | Uhmk1         |        |
| 0.961373788 | 8.36E-08 | 6.26E-12 | 8 | Sptlc1        |        |
| 1.197597819 | 9.19E-08 | 6.88E-12 | 8 | H2-Q4         |        |
| 1.144121693 | 9.69E-08 | 7.26E-12 | 8 | Kremen1       |        |
| 1.026776629 | 1.03E-07 | 7.72E-12 | 8 | Usp39         |        |
| 1.536389931 | 1.12E-07 | 8.37E-12 | 8 | Crbn          |        |
| 0.589157467 | 1.40E-07 | 1.05E-11 | 8 | Camk4         |        |
| 0.643791685 | 1.41E-07 | 1.05E-11 | 8 | Med14         |        |
| 0.715499127 | 1.56E-07 | 1.17E-11 | 8 | Lysmd3        |        |
| 0.649451071 | 1.66E-07 | 1.24E-11 | 8 | Cd28          |        |
| 0.766136962 | 1.70E-07 | 1.27E-11 | 8 | Apoe          |        |
| 1.081758791 | 2.04E-07 | 1.53E-11 | 8 | Oasl1         |        |
| 0.991515337 | 2.29E-07 | 1.71E-11 | 8 | Ubxn2a        |        |
| 0.658071899 | 2.43E-07 | 1.82E-11 | 8 | Sugp1         |        |
| 0.940300731 | 2.47E-07 | 1.85E-11 | 8 | Ginm1         |        |
| 1.075772303 | 2.67E-07 | 2.00E-11 | 8 | Lrrc42        |        |
| 0.723396628 | 2.77E-07 | 2.07E-11 | 8 | Vars          |        |
| 0.531666996 | 3.03E-07 | 2.27E-11 | 8 | Gm11696       |        |
| 1.024833699 | 3.26E-07 | 2.44E-11 | 8 | Itpr2         |        |
| 0.636480207 | 3.75E-07 | 2.81E-11 | 8 | Slc22a15      |        |
| 0.934549217 | 3.82E-07 | 2.86E-11 | 8 | Cd24a         |        |
| 1.059167987 | 3.86E-07 | 2.89E-11 | 8 | Csrp2         |        |
| 1.373092849 | 4.27E-07 | 3.20E-11 | 8 | Crim1         |        |
| 1.013160981 | 4.55E-07 | 3.41E-11 | 8 | AW549877      |        |
| 0.733850875 | 4.75E-07 | 3.56E-11 | 8 | Nol11         |        |
| 0.805496368 | 5.32E-07 | 3.98E-11 | 8 | 1110059G10Rik |        |
| 1.291811806 | 5.37E-07 | 4.02E-11 | 8 | Aven          |        |
| 1.19918147  | 5.52E-07 | 4.13E-11 | 8 | Gm16523       |        |
| 0.814465106 | 5.79E-07 | 4.34E-11 | 8 | Gm20324       |        |
| 0.527354926 | 6.01E-07 | 4.50E-11 | 8 | Kif1a         |        |
| 0.71347411  | 6.05E-07 | 4.53E-11 | 8 | Whamm         |        |
| 1.091709976 | 7.06E-07 | 5.29E-11 | 8 | Lmf2          |        |
| 0.683086734 | 7.53E-07 | 5.64E-11 | 8 | Cobl11        |        |

|             |          |          |   |               |
|-------------|----------|----------|---|---------------|
| 1.549417222 | 7.54E-07 | 5.65E-11 | 8 | Ptar1         |
| 0.686425635 | 8.86E-07 | 6.63E-11 | 8 | Lsm1          |
| 1.285652025 | 9.15E-07 | 6.85E-11 | 8 | Slfn10-ps     |
| 0.704003237 | 1.00E-06 | 7.51E-11 | 8 | Slc23a3       |
| 1.035599447 | 1.04E-06 | 7.76E-11 | 8 | Fnbp1l        |
| 0.9248034   | 1.10E-06 | 8.21E-11 | 8 | Pogk          |
| 0.612210418 | 1.10E-06 | 8.23E-11 | 8 | Socs5         |
| 1.234154973 | 1.36E-06 | 1.02E-10 | 8 | Ctdspl        |
| 1.460819155 | 1.40E-06 | 1.05E-10 | 8 | Map3k12       |
| 0.821244858 | 1.41E-06 | 1.05E-10 | 8 | Gprc5a        |
| 1.058223185 | 1.50E-06 | 1.12E-10 | 8 | Hspbp1        |
| 0.920061717 | 1.56E-06 | 1.17E-10 | 8 | Clstn1        |
| 0.826794743 | 1.91E-06 | 1.43E-10 | 8 | Myh10         |
| 1.221661026 | 2.12E-06 | 1.59E-10 | 8 | Tcf12         |
| 0.678434458 | 2.22E-06 | 1.66E-10 | 8 | Zfp788        |
| 1.169321346 | 2.23E-06 | 1.67E-10 | 8 | Arhgap23      |
| 1.487840402 | 2.38E-06 | 1.78E-10 | 8 | Selo          |
| 1.185953638 | 2.40E-06 | 1.80E-10 | 8 | Ogfod2        |
| 0.75252381  | 2.45E-06 | 1.83E-10 | 8 | Plgrkt        |
| 0.732102148 | 2.45E-06 | 1.84E-10 | 8 | Cdc14a        |
| 0.850946099 | 2.55E-06 | 1.91E-10 | 8 | Map3k3        |
| 1.188862862 | 2.70E-06 | 2.02E-10 | 8 | Ranbp10       |
| 1.076734119 | 2.88E-06 | 2.16E-10 | 8 | C030006K11Rik |
| 1.05424942  | 3.47E-06 | 2.60E-10 | 8 | Prpf18        |
| 0.929877387 | 3.68E-06 | 2.76E-10 | 8 | Oaf           |
| 0.723348817 | 3.84E-06 | 2.88E-10 | 8 | O610009L18Rik |
| 0.876399403 | 4.19E-06 | 3.14E-10 | 8 | Cd3eap        |
| 0.638700893 | 4.42E-06 | 3.31E-10 | 8 | Tmem106b      |
| 0.908550195 | 4.62E-06 | 3.46E-10 | 8 | Ankrd46       |
| 0.60558363  | 4.73E-06 | 3.54E-10 | 8 | Sp100         |
| 1.690207629 | 5.10E-06 | 3.82E-10 | 8 | Maged2        |
| 1.086220289 | 5.73E-06 | 4.29E-10 | 8 | Id3           |
| 0.977863023 | 5.83E-06 | 4.36E-10 | 8 | Trio          |
| 1.081760449 | 6.23E-06 | 4.67E-10 | 8 | Ift122        |
| 1.035030137 | 6.52E-06 | 4.88E-10 | 8 | Myo1c         |
| 0.918369303 | 7.51E-06 | 5.62E-10 | 8 | Ubap2         |
| 0.594190965 | 7.73E-06 | 5.79E-10 | 8 | Zfp945        |
| 0.806636713 | 7.92E-06 | 5.93E-10 | 8 | Sptbn1        |
| 1.005808676 | 8.14E-06 | 6.09E-10 | 8 | Hmgn3         |
| 0.669346303 | 8.14E-06 | 6.10E-10 | 8 | Pwwp2a        |
| 1.154430713 | 8.21E-06 | 6.15E-10 | 8 | Hmgcr         |
| 0.756176723 | 8.31E-06 | 6.23E-10 | 8 | Fmnl2         |
| 0.740363317 | 8.43E-06 | 6.31E-10 | 8 | Rcn1          |
| 1.219632658 | 8.49E-06 | 6.36E-10 | 8 | Mfge8         |
| 0.845435122 | 8.70E-06 | 6.51E-10 | 8 | Cnih1         |
| 1.032265621 | 9.04E-06 | 6.77E-10 | 8 | Ilvbl         |
| 0.64600836  | 9.20E-06 | 6.89E-10 | 8 | Kif13a        |
| 0.734516182 | 1.03E-05 | 7.73E-10 | 8 | Efemp2        |
| 0.86170345  | 1.06E-05 | 7.91E-10 | 8 | Myo6          |
| 0.768363822 | 1.08E-05 | 8.09E-10 | 8 | Erlec1        |
| 1.004842492 | 1.09E-05 | 8.20E-10 | 8 | Impa2         |
| 1.041910127 | 1.10E-05 | 8.25E-10 | 8 | Mapk9         |
| 0.789787148 | 1.12E-05 | 8.41E-10 | 8 | Ago1          |
| 0.468454442 | 1.16E-05 | 8.66E-10 | 8 | Zfp869        |
| 0.905837767 | 1.18E-05 | 8.87E-10 | 8 | Acad9         |
| 0.786688609 | 1.27E-05 | 9.55E-10 | 8 | Fam114a2      |
| 0.638571529 | 1.28E-05 | 9.62E-10 | 8 | Nrp           |
| 1.133039516 | 1.32E-05 | 9.90E-10 | 8 | Tex264        |
| 1.156635313 | 1.33E-05 | 9.95E-10 | 8 | CntlIn        |
| 1.310416898 | 1.51E-05 | 1.13E-09 | 8 | Hyal1         |
| 1.00807033  | 1.60E-05 | 1.20E-09 | 8 | Cers4         |



|              |          |          |   |         |
|--------------|----------|----------|---|---------|
| 0.758616367  | 1.68E-05 | 1.26E-09 | 8 | Cmtm8   |
| 0.660690362  | 1.72E-05 | 1.29E-09 | 8 | Pycr2   |
| 0.860267335  | 1.75E-05 | 1.31E-09 | 8 | Scimp   |
| 0.892135092  | 1.82E-05 | 1.36E-09 | 8 | Gmpr2   |
| 0.665053313  | 1.84E-05 | 1.38E-09 | 8 | Ddx23   |
| 1.074811411  | 1.87E-05 | 1.40E-09 | 8 | Wrb     |
| 0.983261921  | 1.90E-05 | 1.42E-09 | 8 | Zmym3   |
| 0.732546801  | 1.94E-05 | 1.46E-09 | 8 | Zwint   |
| 0.731215325  | 1.96E-05 | 1.47E-09 | 8 | Trub1   |
| 0.756797672  | 1.96E-05 | 1.47E-09 | 8 | Chst14  |
| 0.633798617  | 2.11E-05 | 1.58E-09 | 8 | Ldlrad4 |
| -1.173037137 | 2.14E-05 | 1.60E-09 | 8 | Lgmn    |
| 1.105361623  | 2.14E-05 | 1.60E-09 | 8 | Ccdc93  |
| 1.335621704  | 2.21E-05 | 1.65E-09 | 8 | Gpr84   |
| 1.014156362  | 2.24E-05 | 1.68E-09 | 8 | Arid5b  |
| 0.842151082  | 2.25E-05 | 1.69E-09 | 8 | Fam3c   |
| 0.784949869  | 2.33E-05 | 1.74E-09 | 8 | Ifnb1   |
| 0.931897391  | 2.35E-05 | 1.76E-09 | 8 | Rasgrp3 |
| 1.139391172  | 2.43E-05 | 1.82E-09 | 8 | Zfp652  |
| 0.722113343  | 2.62E-05 | 1.96E-09 | 8 | Itpr1   |
| 0.616832343  | 2.65E-05 | 1.98E-09 | 8 | Cdhr3   |
| 0.932755911  | 2.96E-05 | 2.22E-09 | 8 | Dcaf17  |
| 0.611659344  | 3.06E-05 | 2.29E-09 | 8 | Osgin2  |
| 0.958774169  | 3.24E-05 | 2.42E-09 | 8 | Prkcsh  |
| 0.568122984  | 3.27E-05 | 2.45E-09 | 8 | Nr6a1   |
| 0.751657397  | 3.31E-05 | 2.48E-09 | 8 | Fndc4   |
| 0.798165757  | 3.35E-05 | 2.51E-09 | 8 | Zbtb4   |
| 0.697575576  | 3.38E-05 | 2.53E-09 | 8 | Tmtc4   |
| 0.817784064  | 3.41E-05 | 2.55E-09 | 8 | Hmgn5   |
| 0.825452433  | 3.42E-05 | 2.56E-09 | 8 | Hscb    |
| 1.119913131  | 3.43E-05 | 2.57E-09 | 8 | Nmb     |
| 0.316126585  | 3.52E-05 | 2.64E-09 | 8 | Irg1    |
| 1.388038392  | 3.60E-05 | 2.70E-09 | 8 | Adss    |
| 0.613848192  | 3.74E-05 | 2.80E-09 | 8 | Ncbp1   |
| 0.805248712  | 3.80E-05 | 2.85E-09 | 8 | Cep57   |
| 0.483645295  | 3.88E-05 | 2.91E-09 | 8 | Fpr2    |
| 0.622638775  | 3.93E-05 | 2.95E-09 | 8 | Prpf40b |
| 0.813623442  | 3.99E-05 | 2.99E-09 | 8 | Apopt1  |
| 1.076852996  | 4.09E-05 | 3.06E-09 | 8 | Ins16   |
| -1.065348569 | 4.31E-05 | 3.23E-09 | 8 | Pfn1    |
| 0.738007445  | 4.34E-05 | 3.25E-09 | 8 | Spry2   |
| 0.934636552  | 4.54E-05 | 3.40E-09 | 8 | Utrn    |
| 0.61536948   | 5.05E-05 | 3.78E-09 | 8 | Fh1     |
| 1.226056472  | 5.17E-05 | 3.87E-09 | 8 | Cog2    |
| 0.910566446  | 5.46E-05 | 4.09E-09 | 8 | Ppp6r3  |
| 1.037628539  | 5.48E-05 | 4.10E-09 | 8 | Adpgk   |
| 0.733500726  | 5.58E-05 | 4.18E-09 | 8 | Tsen54  |
| 0.350564655  | 5.65E-05 | 4.23E-09 | 8 | Dnmbp   |
| 1.108331428  | 5.91E-05 | 4.42E-09 | 8 | Jag1    |
| 0.8318262    | 6.20E-05 | 4.64E-09 | 8 | Ptplad1 |
| 0.80556584   | 6.38E-05 | 4.78E-09 | 8 | Glg1    |
| 1.012728     | 6.43E-05 | 4.81E-09 | 8 | Lrsam1  |
| 0.587795749  | 6.45E-05 | 4.83E-09 | 8 | Trmt12  |
| 0.722508598  | 6.56E-05 | 4.91E-09 | 8 | Hnmt    |
| 0.750092356  | 7.10E-05 | 5.32E-09 | 8 | Il18bp  |
| 0.951879273  | 7.13E-05 | 5.34E-09 | 8 | Fn1     |
| 0.72316011   | 7.18E-05 | 5.38E-09 | 8 | Phkb    |
| 0.72884097   | 7.30E-05 | 5.47E-09 | 8 | Vps37c  |
| 0.616226099  | 7.31E-05 | 5.48E-09 | 8 | Mbtps1  |
| 0.601383873  | 7.41E-05 | 5.55E-09 | 8 | Srpk2   |
| 0.82087388   | 7.70E-05 | 5.77E-09 | 8 | Sptan1  |

|             |             |          |   |               |
|-------------|-------------|----------|---|---------------|
| 0.774977199 | 8.15E-05    | 6.10E-09 | 8 | Angptl2       |
| 0.529901771 | 8.36E-05    | 6.26E-09 | 8 | Zc3h6         |
| 0.722226242 | 9.01E-05    | 6.75E-09 | 8 | Rapgef5       |
| 1.518886797 | 9.29E-05    | 6.96E-09 | 8 | Cdk6          |
| 0.403353175 | 9.48E-05    | 7.10E-09 | 8 | Slc2a8        |
| 0.523671221 | 9.95E-05    | 7.45E-09 | 8 | Slc4a7        |
| 0.764101588 | 0.000100866 | 7.55E-09 | 8 | Mlxip         |
| 0.6193543   | 0.000101403 | 7.59E-09 | 8 | Sema6d        |
| 0.626158901 | 0.000101712 | 7.62E-09 | 8 | Trmt61b       |
| 0.580973016 | 0.00010598  | 7.94E-09 | 8 | Tyw5          |
| 1.208407401 | 0.000106239 | 7.96E-09 | 8 | Setd5         |
| 1.110278769 | 0.000116621 | 8.73E-09 | 8 | Alkbh1        |
| 0.650202767 | 0.000118113 | 8.85E-09 | 8 | Hes1          |
| 0.693808075 | 0.000118699 | 8.89E-09 | 8 | Haao          |
| 0.789453712 | 0.000121837 | 9.13E-09 | 8 | Cd300lg       |
| 0.685077404 | 0.000124483 | 9.32E-09 | 8 | H2-M2         |
| 0.639968178 | 0.000127926 | 9.58E-09 | 8 | Timeless      |
| 1.037627304 | 0.000129091 | 9.67E-09 | 8 | Srp68         |
| 0.701346367 | 0.000133599 | 1.00E-08 | 8 | Chchd6        |
| 0.409215285 | 0.000134309 | 1.01E-08 | 8 | Plac8         |
| 0.518851935 | 0.000138636 | 1.04E-08 | 8 | B930059L03Rik |
| 0.902142071 | 0.000142545 | 1.07E-08 | 8 | Man1a         |
| 0.764218623 | 0.000143342 | 1.07E-08 | 8 | Dgke          |
| 0.688542598 | 0.000144018 | 1.08E-08 | 8 | Soga1         |
| 0.942093362 | 0.000144848 | 1.08E-08 | 8 | Fars2         |
| 0.479735443 | 0.000155169 | 1.16E-08 | 8 | Slc19a1       |
| 0.921891476 | 0.000169426 | 1.27E-08 | 8 | Icam1         |
| 0.706873678 | 0.000170478 | 1.28E-08 | 8 | Tigd2         |
| 0.610137734 | 0.000173651 | 1.30E-08 | 8 | Cfl2          |
| 0.539530033 | 0.000187532 | 1.40E-08 | 8 | Kmo           |
| 0.978031266 | 0.000203915 | 1.53E-08 | 8 | Usp31         |
| 0.709692099 | 0.000204526 | 1.53E-08 | 8 | Lyst          |
| 0.959464431 | 0.000206304 | 1.55E-08 | 8 | Lman2l        |
| 1.021760018 | 0.000208291 | 1.56E-08 | 8 | Rasgrp4       |
| 0.38967243  | 0.000213674 | 1.60E-08 | 8 | St3gal5       |
| 1.003883673 | 0.000226037 | 1.69E-08 | 8 | Cd19          |
| 0.525314607 | 0.000234595 | 1.76E-08 | 8 | Usp22         |
| 0.535144247 | 0.000235305 | 1.76E-08 | 8 | Rit1          |
| 0.980829253 | 0.000238826 | 1.79E-08 | 8 | Agps          |
| 0.872967396 | 0.000243036 | 1.82E-08 | 8 | Pbx1          |
| 0.328752721 | 0.000247477 | 1.85E-08 | 8 | Chmp1a        |
| 0.858512272 | 0.00025699  | 1.92E-08 | 8 | Zfp574        |
| 0.734883642 | 0.000264434 | 1.98E-08 | 8 | Zfp768        |
| 0.842376679 | 0.000266688 | 2.00E-08 | 8 | Cept1         |
| 0.874542875 | 0.000269405 | 2.02E-08 | 8 | F2r           |
| 0.857909799 | 0.000284883 | 2.13E-08 | 8 | Selm          |
| 0.815931128 | 0.000284906 | 2.13E-08 | 8 | Flot1         |
| 0.647217626 | 0.000285089 | 2.14E-08 | 8 | Igflr1        |
| 0.946645194 | 0.000287167 | 2.15E-08 | 8 | Rilp          |
| 0.99814855  | 0.000297198 | 2.23E-08 | 8 | Mkks          |
| 0.680635562 | 0.000311214 | 2.33E-08 | 8 | Rps6kc1       |
| 0.794699549 | 0.000340871 | 2.55E-08 | 8 | Zfp758        |
| 1.040494484 | 0.000346053 | 2.59E-08 | 8 | Ercc4         |
| 0.651715909 | 0.000364018 | 2.73E-08 | 8 | Tbc1d16       |
| 0.705768018 | 0.000364569 | 2.73E-08 | 8 | Mrpl2         |
| 1.179563839 | 0.000365905 | 2.74E-08 | 8 | Spin1         |
| 0.911229892 | 0.000366536 | 2.75E-08 | 8 | Kctd10        |
| 0.751657397 | 0.000392059 | 2.94E-08 | 8 | Rpusd4        |
| 0.881208129 | 0.00039884  | 2.99E-08 | 8 | Il6           |
| 0.89711422  | 0.000409179 | 3.06E-08 | 8 | Btla          |
| 0.644242462 | 0.000412601 | 3.09E-08 | 8 | Letm2         |

|             |             |          |   |           |
|-------------|-------------|----------|---|-----------|
| 0.949705296 | 0.000422872 | 3.17E-08 | 8 | Dusp8     |
| 1.152356565 | 0.000438302 | 3.28E-08 | 8 | Akap2     |
| 0.554481221 | 0.000442778 | 3.32E-08 | 8 | Ermard    |
| 0.831305909 | 0.000449694 | 3.37E-08 | 8 | Dohh      |
| 1.142699824 | 0.000450993 | 3.38E-08 | 8 | E4f1      |
| 1.137628412 | 0.000462663 | 3.47E-08 | 8 | Lamc1     |
| 0.557256654 | 0.000466847 | 3.50E-08 | 8 | Nub1      |
| 0.973210465 | 0.000468856 | 3.51E-08 | 8 | Gpatch2l  |
| 0.629108421 | 0.000469327 | 3.52E-08 | 8 | Gabpb2    |
| 0.969716359 | 0.000469807 | 3.52E-08 | 8 | Prpsap1   |
| 0.99395628  | 0.00047139  | 3.53E-08 | 8 | Eif2b2    |
| 0.938083745 | 0.000478919 | 3.59E-08 | 8 | Ednrb     |
| 1.052753168 | 0.000490964 | 3.68E-08 | 8 | Hirip3    |
| 0.722212447 | 0.000491122 | 3.68E-08 | 8 | Fam210a   |
| 1.773851683 | 0.000508557 | 3.81E-08 | 8 | Ppm1m     |
| 0.621964781 | 0.000534028 | 4.00E-08 | 8 | Pura      |
| 0.394788297 | 0.000548954 | 4.11E-08 | 8 | Araf      |
| 0.755962599 | 0.000571469 | 4.28E-08 | 8 | Prkacb    |
| 0.86842028  | 0.000582569 | 4.36E-08 | 8 | Nek9      |
| 0.838126895 | 0.000584979 | 4.38E-08 | 8 | Tmem173   |
| 0.669410334 | 0.000610585 | 4.57E-08 | 8 | Kank2     |
| 0.950554087 | 0.000626134 | 4.69E-08 | 8 | Spib      |
| 0.764334067 | 0.000630333 | 4.72E-08 | 8 | Dst       |
| 0.963201678 | 0.000645935 | 4.84E-08 | 8 | Inpp5f    |
| 0.91644141  | 0.000648385 | 4.86E-08 | 8 | Ms4a1     |
| 0.929448355 | 0.00068003  | 5.09E-08 | 8 | Tex30     |
| 0.563803323 | 0.000688528 | 5.16E-08 | 8 | Ccdc32    |
| 0.623304938 | 0.000700679 | 5.25E-08 | 8 | Wdr44     |
| 0.911316321 | 0.00078057  | 5.85E-08 | 8 | Ercc1     |
| 1.306802238 | 0.000806112 | 6.04E-08 | 8 | Ptgfrn    |
| 0.499416053 | 0.000811661 | 6.08E-08 | 8 | Nfil3     |
| 0.405379612 | 0.000818638 | 6.13E-08 | 8 | Phb       |
| 0.517505801 | 0.000838811 | 6.28E-08 | 8 | Trmt2a    |
| 0.876688567 | 0.000865263 | 6.48E-08 | 8 | Gabarapl1 |
| 0.902577056 | 0.000876247 | 6.56E-08 | 8 | Wdr77     |
| 0.444583281 | 0.000882804 | 6.61E-08 | 8 | Nfix      |
| 0.401068899 | 0.000883953 | 6.62E-08 | 8 | Mtmt9     |
| 0.64238392  | 0.000928815 | 6.96E-08 | 8 | Gpatch8   |
| 0.738755282 | 0.000934733 | 7.00E-08 | 8 | Pcmt1d1   |
| 0.87368197  | 0.000968784 | 7.26E-08 | 8 | Gas2l1    |
| 0.843160086 | 0.000994674 | 7.45E-08 | 8 | Jdp2      |
| 1.098162013 | 0.00103908  | 7.78E-08 | 8 | Zfp35     |
| 0.670571298 | 0.001049054 | 7.86E-08 | 8 | Mff       |
| 0.748620021 | 0.001098042 | 8.22E-08 | 8 | Ankrd17   |
| 0.723282216 | 0.001175772 | 8.81E-08 | 8 | Eif4g1    |
| 0.862740503 | 0.001209222 | 9.06E-08 | 8 | Otud5     |
| 0.856163684 | 0.001262306 | 9.45E-08 | 8 | F11r      |
| 0.843996906 | 0.001292076 | 9.68E-08 | 8 | Hyal2     |
| 0.815808982 | 0.00135765  | 1.02E-07 | 8 | Ppfibp1   |
| 0.532587366 | 0.001378472 | 1.03E-07 | 8 | Timm9     |
| 0.965173196 | 0.001393832 | 1.04E-07 | 8 | Diap1     |
| 0.952880461 | 0.001419056 | 1.06E-07 | 8 | Gpd2      |
| 0.89418826  | 0.00144785  | 1.08E-07 | 8 | Dnajb2    |
| 0.958890707 | 0.001473911 | 1.10E-07 | 8 | Sorbs3    |
| 0.799867727 | 0.001479745 | 1.11E-07 | 8 | Dpp7      |
| 2.701455472 | 0.001624476 | 1.22E-07 | 8 | Serping1  |
| 0.760277361 | 0.001625478 | 1.22E-07 | 8 | Zbtb11    |
| 0.818759502 | 0.001633315 | 1.22E-07 | 8 | Snx16     |
| 1.106565689 | 0.001667619 | 1.25E-07 | 8 | Slc25a25  |
| 0.970787693 | 0.001669229 | 1.25E-07 | 8 | B3gnt5    |
| 1.299975951 | 0.001675216 | 1.25E-07 | 8 | Crip2     |

|              |             |          |   |               |
|--------------|-------------|----------|---|---------------|
| 1.210456395  | 0.001707751 | 1.28E-07 | 8 | Nuak1         |
| 0.653844087  | 0.001720171 | 1.29E-07 | 8 | Zfp715        |
| 0.649171059  | 0.001732869 | 1.30E-07 | 8 | Aatf          |
| 0.902939572  | 0.001738268 | 1.30E-07 | 8 | Gpsm1         |
| 0.680474629  | 0.00175894  | 1.32E-07 | 8 | Sec24d        |
| 0.882848845  | 0.001769708 | 1.33E-07 | 8 | Laptm4b       |
| 1.109549603  | 0.001803032 | 1.35E-07 | 8 | Clcn3         |
| 0.534911641  | 0.001853815 | 1.39E-07 | 8 | 1700123O20Rik |
| 1.357850992  | 0.001891844 | 1.42E-07 | 8 | E230008N13Rik |
| 0.712827955  | 0.001928507 | 1.44E-07 | 8 | Emc3          |
| 0.707788731  | 0.001947355 | 1.46E-07 | 8 | Add3          |
| 0.691956966  | 0.001999778 | 1.50E-07 | 8 | Tmed3         |
| 0.740250412  | 0.002021942 | 1.51E-07 | 8 | Ntan1         |
| 0.834460714  | 0.002075889 | 1.55E-07 | 8 | Pilrb1        |
| 2.05823799   | 0.002113738 | 1.58E-07 | 8 | Aebp1         |
| 0.895827475  | 0.002151058 | 1.61E-07 | 8 | Rhoq          |
| 0.874139121  | 0.002157508 | 1.62E-07 | 8 | Fblim1        |
| 0.818700651  | 0.002175171 | 1.63E-07 | 8 | Dopey1        |
| 1.017139477  | 0.002189322 | 1.64E-07 | 8 | Fam78a        |
| 0.844126199  | 0.002208129 | 1.65E-07 | 8 | Hdac5         |
| 0.435243482  | 0.002262759 | 1.69E-07 | 8 | Sec13         |
| 1.12454113   | 0.002273161 | 1.70E-07 | 8 | Lrrc32        |
| 0.891753603  | 0.002277666 | 1.71E-07 | 8 | 1810032O08Rik |
| 0.786381742  | 0.002351141 | 1.76E-07 | 8 | Ptges2        |
| 1.046014199  | 0.002454141 | 1.84E-07 | 8 | Havcr2        |
| 0.886181942  | 0.002509991 | 1.88E-07 | 8 | Dkc1          |
| 0.501015458  | 0.002574482 | 1.93E-07 | 8 | Gopc          |
| 1.940870824  | 0.002593456 | 1.94E-07 | 8 | Rarres2       |
| 0.729139801  | 0.002596808 | 1.94E-07 | 8 | Men1          |
| -0.497354603 | 0.002619535 | 1.96E-07 | 8 | Ctsb          |
| 0.652168528  | 0.002738448 | 2.05E-07 | 8 | Ppp2r5e       |
| 1.234343076  | 0.002868066 | 2.15E-07 | 8 | Zrsr1         |
| 0.755874178  | 0.002872537 | 2.15E-07 | 8 | Frrs1         |
| 0.440481583  | 0.00290335  | 2.17E-07 | 8 | Map3k4        |
| 0.695951547  | 0.002916157 | 2.18E-07 | 8 | Rusc1         |
| 0.948577111  | 0.002993813 | 2.24E-07 | 8 | Col4a2        |
| 0.559285504  | 0.003034395 | 2.27E-07 | 8 | 1700021K19Rik |
| 0.551668329  | 0.003169924 | 2.37E-07 | 8 | Rapgef1       |
| 0.6924207    | 0.003243549 | 2.43E-07 | 8 | Hdhd2         |
| 0.725778842  | 0.003363089 | 2.52E-07 | 8 | Lpp           |
| 0.655375595  | 0.003425893 | 2.57E-07 | 8 | Ampd2         |
| 0.874355698  | 0.003429387 | 2.57E-07 | 8 | Tceanc2       |
| 0.847361334  | 0.003523891 | 2.64E-07 | 8 | Aga           |
| 0.667210584  | 0.003549638 | 2.66E-07 | 8 | Nenf          |
| 0.571577821  | 0.003625222 | 2.72E-07 | 8 | Chtop         |
| 1.095823952  | 0.003745271 | 2.81E-07 | 8 | Osbpl7        |
| 0.401687519  | 0.003865524 | 2.90E-07 | 8 | Parp9         |
| 0.510213816  | 0.003872744 | 2.90E-07 | 8 | Pop5          |
| 0.83113908   | 0.003963121 | 2.97E-07 | 8 | Ubfd1         |
| 0.494248668  | 0.003984451 | 2.98E-07 | 8 | Cox14         |
| 0.495379146  | 0.004193611 | 3.14E-07 | 8 | Fam78b        |
| 1.151944418  | 0.004268895 | 3.20E-07 | 8 | Mrpl1         |
| 0.435470326  | 0.004560465 | 3.42E-07 | 8 | Pi4k2b        |
| 0.882868637  | 0.004639035 | 3.47E-07 | 8 | Aspa          |
| 0.539769418  | 0.004762684 | 3.57E-07 | 8 | Ndufaf2       |
| 0.473264755  | 0.004815082 | 3.61E-07 | 8 | Blk           |
| 0.630001703  | 0.004835279 | 3.62E-07 | 8 | Psmd10        |
| 0.792423652  | 0.004894627 | 3.67E-07 | 8 | Mrpl11        |
| 0.45294073   | 0.005122666 | 3.84E-07 | 8 | Plekkg2       |
| 0.647684806  | 0.005146051 | 3.85E-07 | 8 | Firre         |
| 0.746181877  | 0.005189951 | 3.89E-07 | 8 | Imp3          |

|              |             |          |   |               |
|--------------|-------------|----------|---|---------------|
| 0.916290732  | 0.005214644 | 3.91E-07 | 8 | Fam199x       |
| 0.603143709  | 0.005230739 | 3.92E-07 | 8 | Scyl2         |
| 0.429135124  | 0.005546528 | 4.15E-07 | 8 | Fance         |
| 0.796955376  | 0.005747849 | 4.30E-07 | 8 | Cpsf1         |
| 0.570039463  | 0.005810944 | 4.35E-07 | 8 | Scd1          |
| 0.386346709  | 0.005896751 | 4.42E-07 | 8 | Thada         |
| 0.715627809  | 0.005964172 | 4.47E-07 | 8 | Dhx16         |
| 0.673457884  | 0.006062692 | 4.54E-07 | 8 | Enoph1        |
| 0.757577541  | 0.006089031 | 4.56E-07 | 8 | Rif1          |
| 0.677389961  | 0.006090007 | 4.56E-07 | 8 | Cenpw         |
| 0.708154482  | 0.006196074 | 4.64E-07 | 8 | Slmo2         |
| 1.013628766  | 0.006263206 | 4.69E-07 | 8 | Cdc42ep3      |
| 0.776761849  | 0.006402948 | 4.80E-07 | 8 | Zdhhc17       |
| 0.496479637  | 0.006989791 | 5.24E-07 | 8 | Gorab         |
| 0.483524033  | 0.007054382 | 5.28E-07 | 8 | Arhgap31      |
| 0.943126375  | 0.007492521 | 5.61E-07 | 8 | Ctsf          |
| 1.025854102  | 0.007590346 | 5.68E-07 | 8 | Zfp580        |
| 0.542549726  | 0.007753851 | 5.81E-07 | 8 | Ube2h         |
| 0.703605596  | 0.00782847  | 5.86E-07 | 8 | Hectd1        |
| 0.829328627  | 0.007915261 | 5.93E-07 | 8 | 5830418K08Rik |
| 0.663027469  | 0.008106067 | 6.07E-07 | 8 | Ptgs1         |
| 0.580745324  | 0.008116207 | 6.08E-07 | 8 | Polr2c        |
| 0.521131533  | 0.008187852 | 6.13E-07 | 8 | Zfp62         |
| 0.741188709  | 0.008201969 | 6.14E-07 | 8 | Slc25a28      |
| 0.288187761  | 0.008243599 | 6.17E-07 | 8 | Lsr           |
| 0.675187214  | 0.008789517 | 6.58E-07 | 8 | Cwc27         |
| 0.752706626  | 0.008889479 | 6.66E-07 | 8 | Nol8          |
| 0.54909572   | 0.008905765 | 6.67E-07 | 8 | Rsf1          |
| 0.649748791  | 0.008993145 | 6.74E-07 | 8 | Pla2g16       |
| 0.885506103  | 0.009123362 | 6.83E-07 | 8 | Drosha        |
| 1.300009993  | 0.009326497 | 6.99E-07 | 8 | Al837181      |
| 0.715789256  | 0.009469517 | 7.09E-07 | 8 | Tmem57        |
| 0.557681335  | 0.009622268 | 7.21E-07 | 8 | St7l          |
| 0.75353277   | 0.009749839 | 7.30E-07 | 8 | Msl3          |
| 0.45395514   | 0.01004458  | 7.52E-07 | 8 | Mettl25       |
| 0.649096058  | 0.010063605 | 7.54E-07 | 8 | Srrt          |
| 0.996735825  | 0.010126385 | 7.58E-07 | 8 | Hspb11        |
| 0.683024173  | 0.010274932 | 7.70E-07 | 8 | Gmeb2         |
| 0.575259864  | 0.01027569  | 7.70E-07 | 8 | Ccnd2         |
| 1.01228141   | 0.010319274 | 7.73E-07 | 8 | Calcr1        |
| 0.33086411   | 0.010371418 | 7.77E-07 | 8 | Snrnp25       |
| 0.609965887  | 0.010657536 | 7.98E-07 | 8 | Hnrnp3        |
| 0.572529146  | 0.010767409 | 8.06E-07 | 8 | Plbd2         |
| 0.374832973  | 0.011044243 | 8.27E-07 | 8 | P2ry10        |
| 0.41709133   | 0.011281176 | 8.45E-07 | 8 | Tap1          |
| 0.538159746  | 0.011295534 | 8.46E-07 | 8 | Med13l        |
| 0.625675282  | 0.011310761 | 8.47E-07 | 8 | Adipor2       |
| 0.633827772  | 0.012183907 | 9.13E-07 | 8 | Aldh4a1       |
| -0.429956965 | 0.012336092 | 9.24E-07 | 8 | Actb          |
| 0.643654086  | 0.012364598 | 9.26E-07 | 8 | Axl           |
| 0.716262482  | 0.012392197 | 9.28E-07 | 8 | Pddc1         |
| 0.524955347  | 0.012421339 | 9.30E-07 | 8 | Ccdc28a       |
| 0.608998424  | 0.012457711 | 9.33E-07 | 8 | Osgin1        |
| 0.896606889  | 0.012479205 | 9.35E-07 | 8 | Rrp9          |
| 0.682105812  | 0.012695533 | 9.51E-07 | 8 | Lbr           |
| 0.54731346   | 0.013145167 | 9.85E-07 | 8 | Gdi1          |
| 0.761263984  | 0.013177118 | 9.87E-07 | 8 | Mpc2          |
| 0.818008146  | 0.013335566 | 9.99E-07 | 8 | Timm22        |
| 0.761981932  | 0.01339092  | 1.00E-06 | 8 | Mrps23        |
| 0.978650436  | 0.014072792 | 1.05E-06 | 8 | Denr          |
| 0.35734789   | 0.014451727 | 1.08E-06 | 8 | Hspa14        |

|              |             |          |   |               |
|--------------|-------------|----------|---|---------------|
| 0.588483304  | 0.01451567  | 1.09E-06 | 8 | Pkd1          |
| 0.34439767   | 0.014942768 | 1.12E-06 | 8 | Phactr2       |
| 0.559823451  | 0.015211063 | 1.14E-06 | 8 | Map3k9        |
| 0.667138871  | 0.015579589 | 1.17E-06 | 8 | Snhg9         |
| 0.590096932  | 0.015698781 | 1.18E-06 | 8 | Gm16062       |
| 0.847438986  | 0.015962426 | 1.20E-06 | 8 | Cd59a         |
| 0.421786432  | 0.016250036 | 1.22E-06 | 8 | Fam73a        |
| 0.702794237  | 0.016365613 | 1.23E-06 | 8 | 4931406C07Rik |
| 0.788384689  | 0.017010116 | 1.27E-06 | 8 | Zfand2b       |
| 0.505829718  | 0.017034708 | 1.28E-06 | 8 | Zfp644        |
| 1.309015942  | 0.017052361 | 1.28E-06 | 8 | Dtx2          |
| 0.699132912  | 0.017059645 | 1.28E-06 | 8 | Zmynd11       |
| 0.675074034  | 0.017419095 | 1.30E-06 | 8 | Ddt           |
| 0.537653015  | 0.017630998 | 1.32E-06 | 8 | Camsap2       |
| 0.895246885  | 0.01776805  | 1.33E-06 | 8 | Zfp512        |
| 0.487982339  | 0.017992296 | 1.35E-06 | 8 | Crebrf        |
| 0.390180425  | 0.018047174 | 1.35E-06 | 8 | Pibf1         |
| 0.597090032  | 0.01820032  | 1.36E-06 | 8 | Spty2d1       |
| 0.67326699   | 0.018211042 | 1.36E-06 | 8 | Bod1          |
| 0.936121881  | 0.018329523 | 1.37E-06 | 8 | Slc39a6       |
| 1.169014729  | 0.018575914 | 1.39E-06 | 8 | Irak3         |
| 0.677985422  | 0.018679386 | 1.40E-06 | 8 | Stk40         |
| 1.113974411  | 0.018941581 | 1.42E-06 | 8 | Cactin        |
| 0.524863977  | 0.01992141  | 1.49E-06 | 8 | Nudt1         |
| 0.606793249  | 0.020190951 | 1.51E-06 | 8 | Klhl21        |
| 0.649942993  | 0.020264118 | 1.52E-06 | 8 | Abcf2         |
| 0.394309796  | 0.02038708  | 1.53E-06 | 8 | Abcc5         |
| 0.535595157  | 0.020471329 | 1.53E-06 | 8 | Gm14005       |
| 0.367467233  | 0.020511078 | 1.54E-06 | 8 | Birc2         |
| 0.4248953    | 0.020591528 | 1.54E-06 | 8 | Atg10         |
| 0.335092375  | 0.021171631 | 1.59E-06 | 8 | Qpctl         |
| 0.489600985  | 0.021497478 | 1.61E-06 | 8 | Rnf113a2      |
| 0.964570385  | 0.022496308 | 1.68E-06 | 8 | Zufsp         |
| 0.618955738  | 0.022505467 | 1.69E-06 | 8 | Klrb1b        |
| 0.501020996  | 0.022968781 | 1.72E-06 | 8 | Nxpe5         |
| 1.029838836  | 0.022970463 | 1.72E-06 | 8 | Fancm         |
| 0.681966196  | 0.023075471 | 1.73E-06 | 8 | Gmps          |
| 0.573729751  | 0.023308035 | 1.75E-06 | 8 | Lima1         |
| 0.830178792  | 0.023619303 | 1.77E-06 | 8 | Mthfr         |
| 0.600894643  | 0.023629953 | 1.77E-06 | 8 | Ggps1         |
| 0.516121311  | 0.023753345 | 1.78E-06 | 8 | Mtf2          |
| 0.940600239  | 0.024835626 | 1.86E-06 | 8 | Plbd1         |
| 0.419900876  | 0.024845257 | 1.86E-06 | 8 | Zfp410        |
| 0.518731184  | 0.025895916 | 1.94E-06 | 8 | Tnpo2         |
| 0.819535063  | 0.026076281 | 1.95E-06 | 8 | Mtmr10        |
| 0.816050152  | 0.026162426 | 1.96E-06 | 8 | AU022252      |
| 0.503128882  | 0.026216087 | 1.96E-06 | 8 | Pik3r1        |
| 0.53361235   | 0.026618055 | 1.99E-06 | 8 | Wdyhv1        |
| 0.546463279  | 0.027211953 | 2.04E-06 | 8 | Lpar6         |
| 0.989750547  | 0.028000591 | 2.10E-06 | 8 | Daam1         |
| 0.650915827  | 0.028120793 | 2.11E-06 | 8 | Dld           |
| 0.540379281  | 0.028717999 | 2.15E-06 | 8 | Kctd5         |
| -0.453358302 | 0.029010236 | 2.17E-06 | 8 | Tmsb4x        |
| 0.351461905  | 0.029722845 | 2.23E-06 | 8 | Batf3         |
| 0.622708627  | 0.030590648 | 2.29E-06 | 8 | Sap18         |
| 0.516038993  | 0.030855624 | 2.31E-06 | 8 | Phf5a         |
| 0.840362837  | 0.031020955 | 2.32E-06 | 8 | Rwdd2b        |
| 0.465683814  | 0.03118717  | 2.34E-06 | 8 | Fkrp          |
| 0.743737836  | 0.03206255  | 2.40E-06 | 8 | Rrp1b         |
| 0.562898125  | 0.032080562 | 2.40E-06 | 8 | Serpine1      |
| 0.304770778  | 0.032350337 | 2.42E-06 | 8 | Usp12         |

|              |             |          |   |               |
|--------------|-------------|----------|---|---------------|
| 0.490055862  | 0.032434437 | 2.43E-06 | 8 | Nmral1        |
| 0.778128188  | 0.033440156 | 2.50E-06 | 8 | Cfh           |
| 0.671294672  | 0.033814348 | 2.53E-06 | 8 | Ifi35         |
| 0.6695436    | 0.033945991 | 2.54E-06 | 8 | Ccdc174       |
| 0.508868491  | 0.034322945 | 2.57E-06 | 8 | Tprgl         |
| 0.981351992  | 0.034369023 | 2.57E-06 | 8 | Cdt1          |
| 0.627766163  | 0.035384075 | 2.65E-06 | 8 | Ddx26b        |
| 0.700161533  | 0.035637527 | 2.67E-06 | 8 | Abcb9         |
| 0.307139244  | 0.035958756 | 2.69E-06 | 8 | E030024N20Rik |
| 0.739682867  | 0.03698348  | 2.77E-06 | 8 | Yme111        |
| 0.525686608  | 0.03699576  | 2.77E-06 | 8 | Slc25a38      |
| 0.561252301  | 0.037663447 | 2.82E-06 | 8 | Mief1         |
| 0.992285226  | 0.037686393 | 2.82E-06 | 8 | Narfl         |
| 0.383109375  | 0.0382957   | 2.87E-06 | 8 | Ppa1          |
| 0.727399636  | 0.039030682 | 2.92E-06 | 8 | Fech          |
| 0.712454568  | 0.040878512 | 3.06E-06 | 8 | Ep400         |
| 0.502550633  | 0.041477999 | 3.11E-06 | 8 | Tap2          |
| 0.767553349  | 0.042205259 | 3.16E-06 | 8 | Calml4        |
| 0.450917825  | 0.042208982 | 3.16E-06 | 8 | Slc44a2       |
| 0.66951221   | 0.043596868 | 3.27E-06 | 8 | Pxn           |
| 0.48573929   | 0.043740298 | 3.28E-06 | 8 | Syvn1         |
| 0.491940039  | 0.044889155 | 3.36E-06 | 8 | Ccdc82        |
| -0.507145753 | 0.045848512 | 3.43E-06 | 8 | Ctss          |
| 0.432437517  | 0.045959542 | 3.44E-06 | 8 | Klhl6         |
| 1.006280571  | 0.046234948 | 3.46E-06 | 8 | Z310033P09Rik |
| 0.612222441  | 0.04625439  | 3.46E-06 | 8 | Erap1         |
| 0.671888408  | 0.047722154 | 3.57E-06 | 8 | Rpp14         |
| 0.547565274  | 0.047805964 | 3.58E-06 | 8 | Atg2b         |
| 0.644384473  | 0.047951487 | 3.59E-06 | 8 | Ptov1         |
| 0.981836276  | 0.048149578 | 3.61E-06 | 8 | Calu          |
| 0.564093136  | 0.048316322 | 3.62E-06 | 8 | 1600002K03Rik |
| 0.284926708  | 0.048316863 | 3.62E-06 | 8 | Klhl22        |
| 0.675658659  | 0.048436025 | 3.63E-06 | 8 | Micu3         |
| 0.578164215  | 0.048607954 | 3.64E-06 | 8 | Akt1          |
| -0.42301978  | 0.049597016 | 3.71E-06 | 8 | B2m           |
| 0.619340333  | 0.04965795  | 3.72E-06 | 8 | Dhdds         |
| 0.463746434  | 0.049922065 | 3.74E-06 | 8 | Lman1         |
| 0.28534048   | 0.05289384  | 3.96E-06 | 8 | Kansl1l       |
| 0.631979635  | 0.053396288 | 4.00E-06 | 8 | Ccp1          |
| 1.044100079  | 0.053399691 | 4.00E-06 | 8 | Gramd4        |
| 0.831355588  | 0.054295211 | 4.07E-06 | 8 | Rras          |
| 0.447363823  | 0.055459318 | 4.15E-06 | 8 | Casp3         |
| 0.477265072  | 0.055464084 | 4.15E-06 | 8 | Mmp13         |
| 0.319908277  | 0.055816979 | 4.18E-06 | 8 | Strn          |
| 0.75222565   | 0.057984974 | 4.34E-06 | 8 | Grsf1         |
| 0.449173962  | 0.058262179 | 4.36E-06 | 8 | Cenpa         |
| 0.492344359  | 0.058517594 | 4.38E-06 | 8 | Ppme1         |
| 0.330045518  | 0.058677145 | 4.39E-06 | 8 | Pdk1          |
| 0.591186333  | 0.059113569 | 4.43E-06 | 8 | Fam134c       |
| 0.37005307   | 0.059226787 | 4.44E-06 | 8 | Cped1         |
| 0.656592285  | 0.063108024 | 4.73E-06 | 8 | Cdc123        |
| 0.375184971  | 0.063603673 | 4.76E-06 | 8 | Cdc40         |
| 0.541449673  | 0.063808218 | 4.78E-06 | 8 | Tmem64        |
| 0.508555475  | 0.064443117 | 4.83E-06 | 8 | Galc          |
| 0.470141597  | 0.064681606 | 4.84E-06 | 8 | Pnpla8        |
| 0.647039853  | 0.064821414 | 4.85E-06 | 8 | Fgfr1op2      |
| 0.281691002  | 0.06504648  | 4.87E-06 | 8 | Itpr1p1       |
| 0.624538777  | 0.066623725 | 4.99E-06 | 8 | Tmem50b       |
| 0.778770213  | 0.066915389 | 5.01E-06 | 8 | Cdc37l1       |
| 0.512597531  | 0.068174929 | 5.11E-06 | 8 | Tnip3         |
| 0.683794086  | 0.068697696 | 5.15E-06 | 8 | D330023K18Rik |

|              |             |          |   |               |
|--------------|-------------|----------|---|---------------|
| 0.409086083  | 0.069055463 | 5.17E-06 | 8 | Atp11a        |
| 0.823515844  | 0.069297379 | 5.19E-06 | 8 | Acss1         |
| 1.358513155  | 0.070546054 | 5.28E-06 | 8 | Col4a1        |
| 0.467618042  | 0.070624518 | 5.29E-06 | 8 | Dexi          |
| 0.634696131  | 0.071550018 | 5.36E-06 | 8 | Chuk          |
| 0.548628524  | 0.071815972 | 5.38E-06 | 8 | Il2rb         |
| 0.550605237  | 0.072386496 | 5.42E-06 | 8 | Ptpn4         |
| 0.407016163  | 0.076584928 | 5.74E-06 | 8 | Ctdsp1        |
| 0.659368963  | 0.077327001 | 5.79E-06 | 8 | Pygm          |
| 0.50625202   | 0.080127728 | 6.00E-06 | 8 | Sec23ip       |
| 0.772276684  | 0.081501169 | 6.10E-06 | 8 | Mfng          |
| 0.748052801  | 0.081987011 | 6.14E-06 | 8 | Rbpms         |
| 0.373754262  | 0.082899141 | 6.21E-06 | 8 | Nufip1        |
| 0.586494129  | 0.083444666 | 6.25E-06 | 8 | Sh3glb2       |
| 0.995223639  | 0.083591296 | 6.26E-06 | 8 | Eif2b1        |
| 0.86363319   | 0.083794234 | 6.28E-06 | 8 | Amz1          |
| 0.528015388  | 0.083916122 | 6.28E-06 | 8 | Slc25a19      |
| 0.551691333  | 0.08402502  | 6.29E-06 | 8 | 5430437J10Rik |
| 0.656682822  | 0.084232275 | 6.31E-06 | 8 | Itpripl2      |
| 0.89837831   | 0.08481994  | 6.35E-06 | 8 | Enpp4         |
| 0.675922913  | 0.085355539 | 6.39E-06 | 8 | Cltb          |
| 0.490477578  | 0.085410546 | 6.40E-06 | 8 | Apbb2         |
| 1.144227991  | 0.086367208 | 6.47E-06 | 8 | Dnm1          |
| 0.256108811  | 0.086861628 | 6.51E-06 | 8 | Zcchc11       |
| 1.727188038  | 0.088354652 | 6.62E-06 | 8 | C3            |
| 0.721722851  | 0.088487353 | 6.63E-06 | 8 | Lrpprc        |
| 0.572047392  | 0.090934448 | 6.81E-06 | 8 | Ndr3          |
| 0.517049394  | 0.090962191 | 6.81E-06 | 8 | Al314180      |
| 0.510668502  | 0.091140582 | 6.83E-06 | 8 | Ivd           |
| 0.661520538  | 0.091225815 | 6.83E-06 | 8 | Cpq           |
| 0.348602448  | 0.092039987 | 6.89E-06 | 8 | Frmd8         |
| 0.452072419  | 0.092116813 | 6.90E-06 | 8 | Ppp1r15a      |
| 0.360116377  | 0.092415933 | 6.92E-06 | 8 | Mtmr2         |
| 0.359003234  | 0.093035271 | 6.97E-06 | 8 | Ccdc66        |
| 0.333054312  | 0.093608992 | 7.01E-06 | 8 | 1190002N15Rik |
| 0.790155332  | 0.095265551 | 7.13E-06 | 8 | Hgs           |
| 0.994176363  | 0.097522203 | 7.30E-06 | 8 | Ankrd11       |
| 0.770363187  | 0.097564735 | 7.31E-06 | 8 | Slc7a7        |
| 0.598007724  | 0.097966863 | 7.34E-06 | 8 | Herc6         |
| 0.423863519  | 0.09818199  | 7.35E-06 | 8 | Casd1         |
| 0.371104275  | 0.099668892 | 7.46E-06 | 8 | Rsb1l         |
| 0.740728326  | 0.100352339 | 7.52E-06 | 8 | Dopey2        |
| 0.545181309  | 0.104068041 | 7.79E-06 | 8 | Kansl1        |
| 0.541005285  | 0.104422377 | 7.82E-06 | 8 | Cdk2ap2       |
| 0.641856914  | 0.107291916 | 8.04E-06 | 8 | Sfr1          |
| 0.686003671  | 0.107449945 | 8.05E-06 | 8 | Dcaf5         |
| 0.413788463  | 0.108665814 | 8.14E-06 | 8 | Taf7          |
| 0.337577498  | 0.109327603 | 8.19E-06 | 8 | Pkp3          |
| -0.399393491 | 0.110867817 | 8.30E-06 | 8 | Fcer1g        |
| 0.708526466  | 0.111639146 | 8.36E-06 | 8 | Synrg         |
| 0.621970371  | 0.11218646  | 8.40E-06 | 8 | Ccnl2         |
| 0.528385741  | 0.113020493 | 8.46E-06 | 8 | Smad2         |
| 1.06015111   | 0.114566664 | 8.58E-06 | 8 | Ddx51         |
| 0.364267133  | 0.11554028  | 8.65E-06 | 8 | Sh2d1b1       |
| 0.563407047  | 0.115697861 | 8.67E-06 | 8 | Dhx29         |
| 0.469772542  | 0.117635204 | 8.81E-06 | 8 | Gtf2e2        |
| 0.667462434  | 0.119870402 | 8.98E-06 | 8 | BC005561      |
| 0.352432032  | 0.121242976 | 9.08E-06 | 8 | Elmsan1       |
| 0.527300989  | 0.12128667  | 9.08E-06 | 8 | Sltn          |
| 0.756610388  | 0.122032589 | 9.14E-06 | 8 | Rps6ka4       |
| 0.551201606  | 0.123806748 | 9.27E-06 | 8 | Zc3hav1       |



|             |             |          |   |               |
|-------------|-------------|----------|---|---------------|
| 0.579157159 | 0.125480967 | 9.40E-06 | 8 | Dhx30         |
| 0.728391986 | 0.126596563 | 9.48E-06 | 8 | Hsdl2         |
| 0.442711775 | 0.128370497 | 9.61E-06 | 8 | Vezf1         |
| 0.631453612 | 0.129235397 | 9.68E-06 | 8 | Pmm1          |
| 0.689508906 | 0.129332673 | 9.69E-06 | 8 | Cmas          |
| 0.747428764 | 0.130124055 | 9.75E-06 | 8 | Fbxo18        |
| 0.484170438 | 0.130877797 | 9.80E-06 | 8 | Phf13         |
| 0.656459249 | 0.13208413  | 9.89E-06 | 8 | Gtf2a2        |
| 0.561864615 | 0.133856962 | 1.00E-05 | 8 | Kank3         |
| 0.288782615 | 0.134007732 | 1.00E-05 | 8 | Nae1          |
| 0.660452535 | 0.141299615 | 1.06E-05 | 8 | Actn1         |
| 0.320874481 | 0.144687703 | 1.08E-05 | 8 | Epc1          |
| 0.648658043 | 0.147518697 | 1.10E-05 | 8 | Itga9         |
| 0.579334116 | 0.148451613 | 1.11E-05 | 8 | Insr          |
| 0.291107907 | 0.149715082 | 1.12E-05 | 8 | Ddit3         |
| 0.756694961 | 0.152074261 | 1.14E-05 | 8 | Sla           |
| 0.260568837 | 0.152313953 | 1.14E-05 | 8 | Clpx          |
| 0.373807257 | 0.15645234  | 1.17E-05 | 8 | Usp6nl        |
| 0.670729886 | 0.156899939 | 1.18E-05 | 8 | Dnm2          |
| 0.838714117 | 0.157290965 | 1.18E-05 | 8 | Rbm10         |
| 0.540338559 | 0.160116194 | 1.20E-05 | 8 | Mafk          |
| 0.410253568 | 0.160396347 | 1.20E-05 | 8 | Sf3a1         |
| 0.424541255 | 0.161312363 | 1.21E-05 | 8 | Vegfa         |
| 0.412001164 | 0.164357782 | 1.23E-05 | 8 | Zbed6         |
| 0.508759334 | 0.165237703 | 1.24E-05 | 8 | Fgd6          |
| 0.646435587 | 0.165815924 | 1.24E-05 | 8 | Rprd1b        |
| 0.79449073  | 0.166555724 | 1.25E-05 | 8 | Tada2b        |
| 1.01973025  | 0.166650459 | 1.25E-05 | 8 | Maged1        |
| 0.614915849 | 0.169087768 | 1.27E-05 | 8 | Psm1          |
| 0.777924918 | 0.169868105 | 1.27E-05 | 8 | Rcl1          |
| 0.515907358 | 0.170299564 | 1.28E-05 | 8 | Eif3h         |
| 0.480077369 | 0.176933243 | 1.33E-05 | 8 | Syap1         |
| 0.668239441 | 0.179793705 | 1.35E-05 | 8 | Yipf6         |
| 0.555697993 | 0.180526745 | 1.35E-05 | 8 | Rab18         |
| 0.839329691 | 0.181050543 | 1.36E-05 | 8 | Zscan21       |
| 0.552374627 | 0.18309951  | 1.37E-05 | 8 | Bmp2k         |
| 0.719150337 | 0.185503436 | 1.39E-05 | 8 | Vipas39       |
| 0.512510028 | 0.190107832 | 1.42E-05 | 8 | Prss30        |
| 0.868380376 | 0.191441142 | 1.43E-05 | 8 | 9430076C15Rik |
| 0.412820736 | 0.19415386  | 1.45E-05 | 8 | Mier1         |
| 0.503356646 | 0.194924271 | 1.46E-05 | 8 | Smad3         |
| 0.664624349 | 0.198327282 | 1.49E-05 | 8 | Fubp3         |
| 1.010262639 | 0.198383883 | 1.49E-05 | 8 | Cd79b         |
| 0.421408911 | 0.198953118 | 1.49E-05 | 8 | Nop14         |
| 0.417177133 | 0.201337143 | 1.51E-05 | 8 | Casp6         |
| 0.749850895 | 0.202288695 | 1.52E-05 | 8 | Las1l         |
| 0.733997127 | 0.20491613  | 1.53E-05 | 8 | Ing4          |
| 0.625065211 | 0.208573226 | 1.56E-05 | 8 | Cul1          |
| 0.844988627 | 0.209178166 | 1.57E-05 | 8 | Syne1         |
| 0.345935477 | 0.213429387 | 1.60E-05 | 8 | Shprh         |
| 0.433770315 | 0.214427629 | 1.61E-05 | 8 | Atf7ip        |
| 0.456078132 | 0.215667685 | 1.62E-05 | 8 | Alkbh4        |
| 0.576390663 | 0.216443478 | 1.62E-05 | 8 | Preb          |
| 0.294475778 | 0.217777753 | 1.63E-05 | 8 | Pdzd8         |
| 0.650775999 | 0.21895631  | 1.64E-05 | 8 | Plcb4         |
| 0.548489667 | 0.21919782  | 1.64E-05 | 8 | Stub1         |
| 0.929052018 | 0.21937537  | 1.64E-05 | 8 | Snord104      |
| 0.326883801 | 0.224977769 | 1.68E-05 | 8 | Scyl1         |
| 0.496670154 | 0.234274565 | 1.75E-05 | 8 | Dars2         |
| 0.487030943 | 0.234478385 | 1.76E-05 | 8 | Rock2         |
| 0.381118267 | 0.235613111 | 1.76E-05 | 8 | Gmnn          |

|             |             |          |   |         |        |
|-------------|-------------|----------|---|---------|--------|
| 0.505393352 | 0.236100564 | 1.77E-05 | 8 | Pdap1   |        |
| 0.386411316 | 0.236782711 | 1.77E-05 | 8 | Egr1    |        |
| 0.649528125 | 0.23828239  | 1.78E-05 | 8 | Ist1    |        |
| 0.828061353 | 0.245093324 | 1.84E-05 | 8 | Gstm5   |        |
| 0.661437479 | 0.245109061 | 1.84E-05 | 8 | Irf9    |        |
| 0.43399759  | 0.247329635 | 1.85E-05 | 8 | Plxna2  |        |
| 0.445994223 | 0.248637475 | 1.86E-05 | 8 | Mtif3   |        |
| 0.280498633 | 0.252700416 | 1.89E-05 | 8 | Ramp3   |        |
| 0.373717036 | 0.25598586  | 1.92E-05 | 8 | Cdk5    |        |
| 0.424918685 | 0.257827221 | 1.93E-05 | 8 | Ino80b  |        |
| 0.560037499 | 0.260082651 | 1.95E-05 | 8 | Gskip   |        |
| 1.274770236 | 0.260870298 | 1.95E-05 | 8 | Hdgfrp3 |        |
| 0.674049735 | 0.274484011 | 2.06E-05 | 8 | Tbc1d20 |        |
| 0.431364481 | 0.275879803 | 2.07E-05 | 8 | Mfap1a  |        |
| 0.588017581 | 0.288769345 | 2.16E-05 | 8 | Snhg12  |        |
| 0.750160598 | 0.290153911 | 2.17E-05 | 8 | N6amt2  |        |
| 0.386452404 | 0.294549496 | 2.21E-05 | 8 | Tubb4b  |        |
| 0.463830682 | 0.295423519 | 2.21E-05 | 8 | Sec24a  |        |
| 1.439827109 | 0.298948467 | 2.24E-05 | 8 | C1ra    |        |
| 1.081700484 | 0.299782295 | 2.25E-05 | 8 | Slc30a4 |        |
| 0.391807051 | 0.302774624 | 2.27E-05 | 8 | Sdhc    |        |
| 0.586654587 | 0.303764935 | 2.28E-05 | 8 | Med27   |        |
| 0.80503443  | 0.303857053 | 2.28E-05 | 8 | Cspp1   |        |
| 0.399623527 | 0.31007246  | 2.32E-05 | 8 | Nudt14  |        |
| 0.711463685 | 0.310765661 | 2.33E-05 | 8 | Usp47   |        |
| 0.64545153  | 0.312850085 | 2.34E-05 | 8 | Mepce   |        |
| 0.338471498 | 0.315603665 | 2.36E-05 | 8 | Sik2    |        |
| 0.435534797 | 0.317387049 | 2.38E-05 | 8 | Trim11  |        |
| 0.677637129 | 0.320058423 | 2.40E-05 | 8 | Rnf14   |        |
| 0.538581305 | 0.320716157 | 2.40E-05 | 8 | Zfp821  |        |
| 0.624586797 | 0.322749818 | 2.42E-05 | 8 | Cbx1    |        |
| 0.47155522  | 0.323611334 | 2.42E-05 | 8 | Samd4b  |        |
| 0.32515775  | 0.325759935 | 2.44E-05 | 8 | Fam129a |        |
| 0.490462727 | 0.32660614  | 2.45E-05 | 8 | Ier3    |        |
| 0.878824229 | 0.327105732 | 2.45E-05 | 8 | Trappc5 |        |
| 0.513600741 | 0.330154199 | 2.47E-05 | 8 |         | Sep.02 |
| 0.726433853 | 0.337210775 | 2.53E-05 | 8 | Nudt2   |        |
| 0.567001279 | 0.343182945 | 2.57E-05 | 8 | Fem1c   |        |
| 0.792068524 | 0.344336134 | 2.58E-05 | 8 | Fam135a |        |
| 0.470182536 | 0.347985422 | 2.61E-05 | 8 | Ap3m1   |        |
| 0.848269816 | 0.349415007 | 2.62E-05 | 8 | Ssfa2   |        |
| 0.667942083 | 0.349714274 | 2.62E-05 | 8 | Mrpl3   |        |
| 0.311798221 | 0.35361957  | 2.65E-05 | 8 | Inpp4b  |        |
| 0.818050152 | 0.355238853 | 2.66E-05 | 8 | Zfp11   |        |
| 0.720744377 | 0.355366604 | 2.66E-05 | 8 | Pmpca   |        |
| 0.351647327 | 0.35559044  | 2.66E-05 | 8 | Yars2   |        |
| 0.608381206 | 0.357835812 | 2.68E-05 | 8 | Btbd1   |        |
| 0.522832798 | 0.362209043 | 2.71E-05 | 8 | Paip2   |        |
| 0.293911796 | 0.366632633 | 2.75E-05 | 8 | Me2     |        |
| 0.39254405  | 0.37410227  | 2.80E-05 | 8 | Metap1d |        |
| 0.451439349 | 0.381071514 | 2.85E-05 | 8 | Ccl7    |        |
| 0.45735167  | 0.387600642 | 2.90E-05 | 8 | Eif2s3y |        |
| 0.410790084 | 0.391973296 | 2.94E-05 | 8 | Dhx57   |        |
| 0.507344607 | 0.396154731 | 2.97E-05 | 8 | Ash1l   |        |
| 0.750294289 | 0.398181914 | 2.98E-05 | 8 | Cenpv   |        |
| 1.0447274   | 0.398323849 | 2.98E-05 | 8 | Sash3   |        |
| 0.463058216 | 0.399936762 | 3.00E-05 | 8 | Ankrd12 |        |
| 0.403035716 | 0.404371415 | 3.03E-05 | 8 | Capns1  |        |
| 0.667917793 | 0.404677842 | 3.03E-05 | 8 | Fam46c  |        |
| 0.527391099 | 0.405205074 | 3.03E-05 | 8 | Pdlim1  |        |
| 0.497302842 | 0.42425625  | 3.18E-05 | 8 | Polr2i  |        |

|              |             |          |   |            |
|--------------|-------------|----------|---|------------|
| -1.037102543 | 0.426325006 | 3.19E-05 | 8 | Ctsc       |
| 1.10498595   | 0.435679446 | 3.26E-05 | 8 | Tlcd2      |
| 0.686761817  | 0.439759615 | 3.29E-05 | 8 | Ermp1      |
| 0.651179277  | 0.443720557 | 3.32E-05 | 8 | Git1       |
| 0.886733886  | 0.448587658 | 3.36E-05 | 8 | Jade1      |
| 0.371118979  | 0.456333386 | 3.42E-05 | 8 | Ubr4       |
| 0.481842843  | 0.45813001  | 3.43E-05 | 8 | Ccl5       |
| -0.719885113 | 0.458625326 | 3.43E-05 | 8 | Rps26      |
| 0.485590725  | 0.460407616 | 3.45E-05 | 8 | Rpn1       |
| 0.751872301  | 0.464924365 | 3.48E-05 | 8 | Snip1      |
| 0.419704486  | 0.465949165 | 3.49E-05 | 8 | Wdr37      |
| 0.452140867  | 0.472882187 | 3.54E-05 | 8 | Gm4285     |
| 1.013197864  | 0.474846964 | 3.56E-05 | 8 | Gbp9       |
| 0.67537751   | 0.480721366 | 3.60E-05 | 8 | Csf2rb2    |
| 1.268625893  | 0.486121304 | 3.64E-05 | 8 | Herpud2    |
| 0.898449935  | 0.49050722  | 3.67E-05 | 8 | Batf       |
| -0.922686982 | 0.492273413 | 3.69E-05 | 8 | Fcgr3      |
| 0.569929557  | 0.501212974 | 3.75E-05 | 8 | Aebp2      |
| 0.555020831  | 0.504244463 | 3.78E-05 | 8 | Pctp       |
| 0.677912372  | 0.506059488 | 3.79E-05 | 8 | Timm17b    |
| 0.573984615  | 0.510936196 | 3.83E-05 | 8 | Tns1       |
| 0.982053993  | 0.519610902 | 3.89E-05 | 8 | Ltbp3      |
| 0.346938159  | 0.52248303  | 3.91E-05 | 8 | Polr2j     |
| 0.555995296  | 0.528755882 | 3.96E-05 | 8 | Acot7      |
| 0.456911413  | 0.533603353 | 4.00E-05 | 8 | Uba6       |
| 0.451030226  | 0.534317016 | 4.00E-05 | 8 | Smc1a      |
| 0.536676553  | 0.540504036 | 4.05E-05 | 8 | Add1       |
| 0.468512859  | 0.542158462 | 4.06E-05 | 8 | Copa       |
| -0.367782508 | 0.550237538 | 4.12E-05 | 8 | Ftl1       |
| 0.415525416  | 0.550261445 | 4.12E-05 | 8 | Itga5      |
| -0.44731603  | 0.558033016 | 4.18E-05 | 8 | C1qb       |
| 1.204061571  | 0.561623764 | 4.21E-05 | 8 | Cstf2      |
| 0.308498864  | 0.56518378  | 4.23E-05 | 8 | Cog8       |
| 0.340521598  | 0.565859096 | 4.24E-05 | 8 | Cep350     |
| 0.759939863  | 0.566571815 | 4.24E-05 | 8 | D17Wsu104e |
| 0.563985788  | 0.570371266 | 4.27E-05 | 8 | Ctsw       |
| 0.330074297  | 0.572615305 | 4.29E-05 | 8 | Surf1      |
| 0.278112621  | 0.581571623 | 4.36E-05 | 8 | Memo1      |
| 0.679471234  | 0.58259051  | 4.36E-05 | 8 | Rpl23      |
| 0.446233166  | 0.587506668 | 4.40E-05 | 8 | Rnf169     |
| 0.623995035  | 0.600928871 | 4.50E-05 | 8 | Met        |
| 0.529482571  | 0.601319554 | 4.50E-05 | 8 | Peli2      |
| 0.668926088  | 0.612709942 | 4.59E-05 | 8 | Polr2g     |
| 0.32545639   | 0.614241738 | 4.60E-05 | 8 | Acvrl1     |
| 0.692501394  | 0.642411318 | 4.81E-05 | 8 | Themis2    |
| 0.43154489   | 0.645061648 | 4.83E-05 | 8 | Usp34      |
| 0.521233833  | 0.653797432 | 4.90E-05 | 8 | Rexo1      |
| 0.379816572  | 0.654427353 | 4.90E-05 | 8 | Ift20      |
| 0.523671221  | 0.660706085 | 4.95E-05 | 8 | Tsc22d1    |
| 0.578499646  | 0.677283721 | 5.07E-05 | 8 | Ap3m2      |
| 0.79329093   | 0.678504153 | 5.08E-05 | 8 | Mesdc2     |
| 0.410808818  | 0.688229146 | 5.15E-05 | 8 | Oraov1     |
| 0.32963382   | 0.689326358 | 5.16E-05 | 8 | Tmem176a   |
| 0.526705378  | 0.691302328 | 5.18E-05 | 8 | Dnajb4     |
| 0.689110848  | 0.701778832 | 5.26E-05 | 8 | Mars       |
| 0.438801746  | 0.702619907 | 5.26E-05 | 8 | E2f1       |
| 0.445062891  | 0.705171342 | 5.28E-05 | 8 | Gart       |
| 0.484112215  | 0.706669717 | 5.29E-05 | 8 | Fam76b     |
| 0.699583245  | 0.713696894 | 5.35E-05 | 8 | Ift88      |
| 0.650156996  | 0.715927845 | 5.36E-05 | 8 | Rnf219     |
| 0.271207235  | 0.726542309 | 5.44E-05 | 8 | Jade2      |

|              |             |          |   |         |
|--------------|-------------|----------|---|---------|
| 0.528762819  | 0.741100192 | 5.55E-05 | 8 | Elf2    |
| 0.397033187  | 0.743203471 | 5.57E-05 | 8 | Tango2  |
| 0.49400262   | 0.744531756 | 5.58E-05 | 8 | Cct2    |
| 0.323897729  | 0.751149212 | 5.63E-05 | 8 | Wdr8    |
| 0.611330794  | 0.751895963 | 5.63E-05 | 8 | Rcbtb1  |
| 0.446079968  | 0.753021659 | 5.64E-05 | 8 | Stxbp3b |
| 1.097655155  | 0.75641558  | 5.67E-05 | 8 | Ddah2   |
| 0.66599661   | 0.75806717  | 5.68E-05 | 8 | Smim8   |
| 0.35640751   | 0.76095404  | 5.70E-05 | 8 | Katna1  |
| 0.292833229  | 0.768871846 | 5.76E-05 | 8 | Kmt2c   |
| 0.458359719  | 0.769026993 | 5.76E-05 | 8 | Cbx6    |
| 0.320061127  | 0.788326506 | 5.90E-05 | 8 | Fam193a |
| 1.043871063  | 0.788425933 | 5.90E-05 | 8 | Rhoj    |
| 0.323188761  | 0.789240385 | 5.91E-05 | 8 | Ghdc    |
| 0.289239777  | 0.78948932  | 5.91E-05 | 8 | Tusc2   |
| 0.498417224  | 0.834805549 | 6.25E-05 | 8 | Slco2b1 |
| -0.436466541 | 0.837682509 | 6.27E-05 | 8 | Cfl1    |
| 0.363925252  | 0.864288427 | 6.47E-05 | 8 | Skil    |
| 0.434775263  | 0.869638824 | 6.51E-05 | 8 | Cul5    |
| 0.421701689  | 0.870660951 | 6.52E-05 | 8 | Nek7    |
| 0.346786169  | 0.871125829 | 6.52E-05 | 8 | Snapc5  |
| 0.279191091  | 0.872403971 | 6.53E-05 | 8 | Sdhaf2  |
| 0.475248009  | 0.878554003 | 6.58E-05 | 8 | Exoc3   |
| 0.270721209  | 0.879954763 | 6.59E-05 | 8 | Ppfibp2 |
| 0.558050413  | 0.887991908 | 6.65E-05 | 8 | Flcn    |
| 0.40647416   | 0.894794453 | 6.70E-05 | 8 | Ext2    |
| -1.656262994 | 0.915026033 | 6.85E-05 | 8 | Bicd2   |
| 0.65029237   | 0.921041948 | 6.90E-05 | 8 | Tfpi    |
| 0.412459834  | 0.922339538 | 6.91E-05 | 8 | Mfhas1  |
| 0.372176535  | 0.9372584   | 7.02E-05 | 8 | Ampd3   |
| 0.314086594  | 0.938260887 | 7.03E-05 | 8 | Msl1    |
| 0.849493251  | 0.948452073 | 7.10E-05 | 8 | Rfx7    |
| 0.331713493  | 0.950572123 | 7.12E-05 | 8 | Dhcr7   |
| 0.530413935  | 0.953673513 | 7.14E-05 | 8 | Rabggtb |
| 0.522521664  | 0.96476672  | 7.23E-05 | 8 | Dph6    |
| 0.800200759  | 0.966141691 | 7.24E-05 | 8 | Vps37b  |
| 0.743225276  | 0.967434707 | 7.25E-05 | 8 | Vbp1    |
| 0.493142814  | 1           | 7.51E-05 | 8 | Galk1   |
| 0.776077202  | 1           | 7.74E-05 | 8 | Optn    |
| 0.42255565   | 1           | 7.82E-05 | 8 | Ube2e3  |
| 0.501990837  | 1           | 7.98E-05 | 8 | Anks3   |
| 0.34367156   | 1           | 8.04E-05 | 8 | Slc48a1 |
| 0.397081742  | 1           | 8.09E-05 | 8 | Swap70  |
| 0.587997636  | 1           | 8.11E-05 | 8 | Yaf2    |
| 0.523257228  | 1           | 8.18E-05 | 8 | Dennd4c |
| 0.431340272  | 1           | 8.18E-05 | 8 | Exoc1   |
| 0.279575485  | 1           | 8.25E-05 | 8 | Srsf10  |
| 0.897887147  | 1           | 8.32E-05 | 8 | Nomo1   |
| 0.74110092   | 1           | 8.44E-05 | 8 | Ergic3  |
| 0.619462299  | 1           | 8.46E-05 | 8 | Ephx1   |
| 0.554509339  | 1           | 8.47E-05 | 8 | Paf1    |
| 0.507310682  | 1           | 8.49E-05 | 8 | Erich1  |
| 0.446618026  | 1           | 8.52E-05 | 8 | Eif2a   |
| 0.501264276  | 1           | 8.59E-05 | 8 | Phf3    |
| 0.618720593  | 1           | 8.61E-05 | 8 | Tmem11  |
| 0.287682072  | 1           | 8.64E-05 | 8 | Ccnd3   |
| 0.47278951   | 1           | 8.71E-05 | 8 | Ppp2r1b |
| 0.459120732  | 1           | 8.71E-05 | 8 | Cam1    |
| 0.421000732  | 1           | 8.76E-05 | 8 | Lyve1   |
| -0.84704866  | 1           | 9.00E-05 | 8 | Gm1821  |
| 0.784716666  | 1           | 9.08E-05 | 8 | Akap7   |

|              |   |           |   |               |
|--------------|---|-----------|---|---------------|
| 0.478578036  | 1 | 9.31E-05  | 8 | Syn1          |
| 0.537482516  | 1 | 9.31E-05  | 8 | Cpd           |
| 0.541354612  | 1 | 9.40E-05  | 8 | Arrb1         |
| 0.401829698  | 1 | 9.41E-05  | 8 | Tmem147       |
| 0.518603345  | 1 | 9.46E-05  | 8 | Mapre2        |
| 1.027791578  | 1 | 9.51E-05  | 8 | Ap5s1         |
| 0.475296853  | 1 | 9.78E-05  | 8 | Atg3          |
| 0.340616398  | 1 | 9.83E-05  | 8 | Agap3         |
| 0.28128122   | 1 | 9.87E-05  | 8 | Fam189b       |
| 0.285394346  | 1 | 9.92E-05  | 8 | Pom121        |
| 0.483531411  | 1 | 0.0001011 | 8 | Taf1b         |
| 0.44670115   | 1 | 0.0001013 | 8 | Dyrk1a        |
| 0.300555275  | 1 | 0.0001016 | 8 | P2rx7         |
| 0.554451471  | 1 | 0.000102  | 8 | Mrpl40        |
| 0.442418221  | 1 | 0.0001023 | 8 | Ints12        |
| 0.599556237  | 1 | 0.0001035 | 8 | Slc16a3       |
| 0.371469324  | 1 | 0.00011   | 8 | Asb2          |
| -0.878650165 | 1 | 0.0001106 | 8 | Mir6236       |
| 0.362216722  | 1 | 0.0001124 | 8 | 9130401M01Rik |
| 0.399492754  | 1 | 0.0001126 | 8 | Tapbp         |
| 0.3931798    | 1 | 0.0001133 | 8 | Cic           |
| 0.402601875  | 1 | 0.0001148 | 8 | Nr4a2         |
| 0.344679559  | 1 | 0.0001151 | 8 | Aco2          |
| 2.154794966  | 1 | 0.0001159 | 8 | Serpina3n     |
| 0.424880296  | 1 | 0.0001159 | 8 | Ndufv1        |
| 0.520552712  | 1 | 0.0001167 | 8 | Gm15708       |
| 0.340387063  | 1 | 0.0001168 | 8 | Txndc11       |
| 0.307991955  | 1 | 0.0001174 | 8 | A630001G21Rik |
| 0.361576466  | 1 | 0.0001183 | 8 | Zfp106        |
| 0.364598559  | 1 | 0.0001186 | 8 | Pdlim7        |
| 0.544226098  | 1 | 0.0001193 | 8 | Ttc4          |
| 0.445342781  | 1 | 0.0001203 | 8 | Pten          |
| 0.53166433   | 1 | 0.0001234 | 8 | Chd8          |
| 0.500813988  | 1 | 0.0001237 | 8 | Guk1          |
| 0.532753248  | 1 | 0.0001244 | 8 | Herpud1       |
| 0.576069115  | 1 | 0.0001245 | 8 | Strada        |
| 0.744996989  | 1 | 0.0001246 | 8 | Gnpat         |
| 0.522425046  | 1 | 0.0001249 | 8 | Ncor1         |
| 0.46536325   | 1 | 0.0001253 | 8 | Eci2          |
| 0.369944072  | 1 | 0.0001253 | 8 | Rnf11         |
| 0.631550605  | 1 | 0.0001275 | 8 | Fahd2a        |
| 0.409513497  | 1 | 0.0001281 | 8 | Vps18         |
| 0.488352768  | 1 | 0.0001292 | 8 | Dnajc25       |
| -0.295046148 | 1 | 0.0001295 | 8 | Fth1          |
| 0.467276394  | 1 | 0.0001299 | 8 | Bet1l         |
| 0.322005535  | 1 | 0.0001305 | 8 | Clcn4-2       |
| 0.405503908  | 1 | 0.0001305 | 8 | Psmd4         |
| 0.415656114  | 1 | 0.0001313 | 8 | Rbms1         |
| 0.614575648  | 1 | 0.0001319 | 8 | Tmem62        |
| 0.543165352  | 1 | 0.0001335 | 8 | Slc25a4       |
| 0.647413987  | 1 | 0.0001341 | 8 | Tcf25         |
| 0.688580681  | 1 | 0.0001342 | 8 | Arhgef2       |
| 0.278192359  | 1 | 0.0001345 | 8 | Dnaja3        |
| 0.689033356  | 1 | 0.0001359 | 8 | Igfbp4        |
| 0.501751819  | 1 | 0.000136  | 8 | Ganab         |
| 0.661103011  | 1 | 0.0001363 | 8 | Glipr1        |
| 0.417216793  | 1 | 0.0001368 | 8 | Phb2          |
| 0.366642375  | 1 | 0.0001371 | 8 | Rcan1         |
| 0.684788557  | 1 | 0.0001382 | 8 | Dapk1         |
| 0.684559488  | 1 | 0.0001401 | 8 | Slc38a1       |
| 0.261052647  | 1 | 0.0001409 | 8 | Slc12a7       |

|              |   |           |   |               |
|--------------|---|-----------|---|---------------|
| 0.42863124   | 1 | 0.0001413 | 8 | Uqcrc2        |
| 0.374270706  | 1 | 0.0001454 | 8 | Zfp110        |
| 0.507315568  | 1 | 0.0001457 | 8 | Eif4g3        |
| 0.659679533  | 1 | 0.0001468 | 8 | Hmgxb3        |
| 0.338006182  | 1 | 0.0001481 | 8 | Kdm3a         |
| 0.610389022  | 1 | 0.0001484 | 8 | Zcwpw1        |
| 0.475625439  | 1 | 0.0001499 | 8 | Arl3          |
| 0.465564558  | 1 | 0.0001516 | 8 | Cct7          |
| 0.5150829    | 1 | 0.0001523 | 8 | Rrp1          |
| 0.396387658  | 1 | 0.0001526 | 8 | Timp2         |
| 0.484910004  | 1 | 0.0001537 | 8 | Gm3219        |
| 0.277836149  | 1 | 0.0001545 | 8 | Slc1a5        |
| 0.533334965  | 1 | 0.0001556 | 8 | Gaa           |
| 0.512152989  | 1 | 0.0001581 | 8 | Slc26a11      |
| 0.733905982  | 1 | 0.0001588 | 8 | Wars          |
| 0.388161901  | 1 | 0.0001636 | 8 | Ipo7          |
| 0.365533667  | 1 | 0.0001661 | 8 | Mrpl30        |
| 0.528421386  | 1 | 0.00017   | 8 | Qser1         |
| 0.275237467  | 1 | 0.0001705 | 8 | Smim24        |
| 0.488268511  | 1 | 0.0001709 | 8 | Cbfa2t2       |
| 0.284937428  | 1 | 0.0001755 | 8 | Tbc1d9        |
| -1.129992928 | 1 | 0.0001774 | 8 | Camta2        |
| 0.545485966  | 1 | 0.0001783 | 8 | Fopnl         |
| 0.40055679   | 1 | 0.0001807 | 8 | Anxa6         |
| 0.499903575  | 1 | 0.0001836 | 8 | Mettl9        |
| 0.434960799  | 1 | 0.0001838 | 8 | Snrpd1        |
| 0.652550996  | 1 | 0.0001843 | 8 | Gkap1         |
| 1.013823543  | 1 | 0.0001858 | 8 | Lrch3         |
| 0.399602307  | 1 | 0.0001863 | 8 | Trmt1         |
| 0.345193578  | 1 | 0.0001911 | 8 | Pphln1        |
| 0.429173481  | 1 | 0.0001911 | 8 | Mbtd1         |
| 0.373247961  | 1 | 0.0001934 | 8 | Yeats2        |
| 0.457834473  | 1 | 0.0001976 | 8 | Nme3          |
| 0.272055614  | 1 | 0.0001978 | 8 | Gtf3c2        |
| 0.576230982  | 1 | 0.0002013 | 8 | Mien1         |
| 0.354426207  | 1 | 0.0002037 | 8 | Npepps        |
| 0.775724811  | 1 | 0.0002047 | 8 | Eif1ad        |
| 0.265531832  | 1 | 0.0002065 | 8 | Nr1h3         |
| 0.548490523  | 1 | 0.0002067 | 8 | Rbck1         |
| 1.121508808  | 1 | 0.0002072 | 8 | Slc35c2       |
| 0.361780964  | 1 | 0.000208  | 8 | Atf2          |
| 0.423695459  | 1 | 0.000208  | 8 | Ano6          |
| 0.327757959  | 1 | 0.0002084 | 8 | Snrpa1        |
| 0.528277075  | 1 | 0.0002086 | 8 | Ccnyl1        |
| 0.417732191  | 1 | 0.0002096 | 8 | Acap2         |
| 0.463865571  | 1 | 0.0002112 | 8 | 1110038F14Rik |
| 0.360002734  | 1 | 0.0002131 | 8 | Iqsec2        |
| 0.827696893  | 1 | 0.0002144 | 8 | Ict1          |
| 0.25882361   | 1 | 0.0002208 | 8 | Zfp622        |
| 1.112797192  | 1 | 0.0002209 | 8 | Taf2          |
| 0.306677415  | 1 | 0.0002214 | 8 | Phospho2      |
| 0.444900961  | 1 | 0.0002215 | 8 | Acaa2         |
| 0.582400295  | 1 | 0.000222  | 8 | Yif1b         |
| -0.325665718 | 1 | 0.0002228 | 8 | Gpx1          |
| 0.496628999  | 1 | 0.0002228 | 8 | Il1r2         |
| 1.924081889  | 1 | 0.0002238 | 8 | Wbp1l         |
| 0.727590631  | 1 | 0.0002284 | 8 | Grpel1        |
| 0.5286306    | 1 | 0.0002317 | 8 | Cox20         |
| 0.414994213  | 1 | 0.0002324 | 8 | 2010012O05Rik |
| 0.563965226  | 1 | 0.0002344 | 8 | Pwwp2b        |
| 0.55033589   | 1 | 0.0002346 | 8 | Gtf2h1        |

|              |   |           |   |          |
|--------------|---|-----------|---|----------|
| 0.362211053  | 1 | 0.0002347 | 8 | Mrpl15   |
| 0.514055762  | 1 | 0.0002366 | 8 | Ints1    |
| 0.550208501  | 1 | 0.000241  | 8 | Bcl2l11  |
| 0.298150682  | 1 | 0.0002413 | 8 | Cant1    |
| 0.390802153  | 1 | 0.0002445 | 8 | Klf4     |
| 0.550191696  | 1 | 0.0002458 | 8 | Adamtsl5 |
| 0.300224852  | 1 | 0.0002459 | 8 | Ankrd10  |
| 0.482786232  | 1 | 0.000246  | 8 | Arhgap15 |
| 0.459069963  | 1 | 0.0002484 | 8 | Insig2   |
| 0.624276716  | 1 | 0.0002489 | 8 | Cep152   |
| 0.270293728  | 1 | 0.0002495 | 8 | Mrs2     |
| 0.569942445  | 1 | 0.0002495 | 8 | Phlpp1   |
| 0.39171414   | 1 | 0.00025   | 8 | Spcs2    |
| 0.388030764  | 1 | 0.0002553 | 8 | Chp1     |
| 0.520793055  | 1 | 0.0002587 | 8 | Zranb3   |
| 0.642758688  | 1 | 0.0002587 | 8 | Eng      |
| 0.68096444   | 1 | 0.0002611 | 8 | Dcp2     |
| 0.617444921  | 1 | 0.0002631 | 8 | Trappc8  |
| 0.371948805  | 1 | 0.0002632 | 8 | Reps2    |
| 0.761763773  | 1 | 0.0002637 | 8 | Siglec1  |
| 0.257804429  | 1 | 0.000264  | 8 | Nup205   |
| 0.478266655  | 1 | 0.0002657 | 8 | Tspan17  |
| 0.384781507  | 1 | 0.0002671 | 8 | Ankle2   |
| 0.274636028  | 1 | 0.0002671 | 8 | Trim44   |
| 0.427911414  | 1 | 0.0002692 | 8 | Fbxw8    |
| 0.581269093  | 1 | 0.0002693 | 8 | Oat      |
| 1.071190459  | 1 | 0.0002718 | 8 | Khdrbs1  |
| 0.332662516  | 1 | 0.000273  | 8 | Glod4    |
| 0.406536979  | 1 | 0.000273  | 8 | Zranb2   |
| 0.291523508  | 1 | 0.0002738 | 8 | Tmem214  |
| 0.430961823  | 1 | 0.0002748 | 8 | Zfp296   |
| 0.37277479   | 1 | 0.0002793 | 8 | Mlx      |
| 0.319663615  | 1 | 0.0002854 | 8 | Parvb    |
| 0.256729823  | 1 | 0.0002863 | 8 | Pdrg1    |
| 0.426418015  | 1 | 0.0002867 | 8 | Ddb2     |
| 0.339704526  | 1 | 0.000289  | 8 | Impad1   |
| 0.348628083  | 1 | 0.0002913 | 8 | Lsm4     |
| 0.384222244  | 1 | 0.0002923 | 8 | Cstf3    |
| 0.351592256  | 1 | 0.0002924 | 8 | Zcchc9   |
| 0.350229222  | 1 | 0.0002927 | 8 | Galnt2   |
| 0.48255565   | 1 | 0.0002946 | 8 | B9d2     |
| 0.341741012  | 1 | 0.0002969 | 8 | B4galt1  |
| 0.570490366  | 1 | 0.0002976 | 8 | Srsf11   |
| 0.440155483  | 1 | 0.0003007 | 8 | Dda1     |
| 0.657631014  | 1 | 0.0003009 | 8 | Tppp3    |
| 0.851654941  | 1 | 0.000306  | 8 | Pus3     |
| 0.467970813  | 1 | 0.0003062 | 8 | Ctbp2    |
| 0.25673901   | 1 | 0.0003091 | 8 | Mrps7    |
| 0.484977925  | 1 | 0.00031   | 8 | Pign     |
| 0.375707604  | 1 | 0.0003117 | 8 | Rexo2    |
| 0.384458844  | 1 | 0.000312  | 8 | Eif4h    |
| 0.374785374  | 1 | 0.0003127 | 8 | Raf1     |
| 0.978114729  | 1 | 0.0003174 | 8 | Rnpc3    |
| -0.602341737 | 1 | 0.0003211 | 8 | H2-K1    |
| 0.647369399  | 1 | 0.0003213 | 8 | Klf9     |
| 0.261706586  | 1 | 0.0003226 | 8 | Fyn      |
| 0.587652827  | 1 | 0.0003228 | 8 | Srd5a3   |
| 0.364719724  | 1 | 0.0003331 | 8 | Nt5m     |
| 0.85429119   | 1 | 0.000335  | 8 | Mrpl36   |
| 0.357732585  | 1 | 0.000338  | 8 | Tmppe    |
| 1.668199044  | 1 | 0.0003395 | 8 | Spsb1    |

|              |   |           |   |           |
|--------------|---|-----------|---|-----------|
| 0.478712387  | 1 | 0.0003402 | 8 | Tnfrsf1a  |
| 0.95960185   | 1 | 0.0003405 | 8 | Trim39    |
| 0.534894334  | 1 | 0.0003417 | 8 | Mknk2     |
| 0.614114851  | 1 | 0.0003424 | 8 | Agfg1     |
| 0.344573597  | 1 | 0.0003442 | 8 | Cyld      |
| -1.644561309 | 1 | 0.0003486 | 8 | Bcl10     |
| 0.540144849  | 1 | 0.00035   | 8 | Xrn2      |
| 0.325286297  | 1 | 0.0003528 | 8 | Comtd1    |
| 0.260435545  | 1 | 0.0003541 | 8 | Nadk      |
| 0.533845352  | 1 | 0.0003544 | 8 | Atxn10    |
| -1.607066981 | 1 | 0.0003559 | 8 | Plxnc1    |
| -0.486293511 | 1 | 0.0003567 | 8 | Lyz2      |
| 0.307537446  | 1 | 0.0003571 | 8 | Mrpl12    |
| 0.305700578  | 1 | 0.0003579 | 8 | Suv420h2  |
| 0.851250846  | 1 | 0.0003583 | 8 | Tomm20    |
| 0.576409897  | 1 | 0.0003608 | 8 | Tmem60    |
| 0.335765267  | 1 | 0.0003662 | 8 | Parp1     |
| 0.660456372  | 1 | 0.0003678 | 8 | Ttc1      |
| 0.469712974  | 1 | 0.0003689 | 8 | Wbp1      |
| -1.579424983 | 1 | 0.0003691 | 8 | Msr1      |
| 0.322262406  | 1 | 0.0003708 | 8 | Fcgrt     |
| 0.392244043  | 1 | 0.0003721 | 8 | Map3k1    |
| 0.28488939   | 1 | 0.0003738 | 8 | Eif2ak3   |
| 0.523957414  | 1 | 0.0003817 | 8 | Ube2z     |
| 0.343883352  | 1 | 0.0003829 | 8 | Hbp1      |
| 0.250124878  | 1 | 0.0003832 | 8 | Stx2      |
| 0.396090775  | 1 | 0.0003833 | 8 | Ndufa9    |
| 0.735177937  | 1 | 0.0003843 | 8 | Psmg2     |
| 0.342404866  | 1 | 0.0003902 | 8 | Pja2      |
| 0.33217914   | 1 | 0.0003941 | 8 | Mesdc1    |
| 0.548312333  | 1 | 0.0003972 | 8 | Gramd1b   |
| 0.272746289  | 1 | 0.0003974 | 8 | Cep120    |
| -1.766071474 | 1 | 0.0003977 | 8 | Kat7      |
| 0.559823451  | 1 | 0.0003999 | 8 | Notch2    |
| 0.291388722  | 1 | 0.000404  | 8 | Ap5z1     |
| 0.356748722  | 1 | 0.0004086 | 8 | Polr2f    |
| 0.437253291  | 1 | 0.0004117 | 8 | Rab11fip1 |
| 0.285448433  | 1 | 0.0004172 | 8 | Abcd3     |
| 0.311420838  | 1 | 0.0004185 | 8 | Cntrl     |
| 1.813335794  | 1 | 0.0004191 | 8 | Heatr5a   |
| 0.305058704  | 1 | 0.0004226 | 8 | Atad5     |
| 0.420571246  | 1 | 0.0004227 | 8 | Spred1    |
| 0.664491925  | 1 | 0.000424  | 8 | Aktip     |
| 0.558153134  | 1 | 0.000425  | 8 | Bcap29    |
| 0.48143372   | 1 | 0.0004265 | 8 | Tmem2     |
| 0.581222781  | 1 | 0.0004282 | 8 | Txndc15   |
| 0.260100124  | 1 | 0.0004295 | 8 | Fkbp3     |
| 0.393596451  | 1 | 0.0004374 | 8 | Pold3     |
| 0.328401544  | 1 | 0.0004389 | 8 | Hint2     |
| 0.315543235  | 1 | 0.0004409 | 8 | Sgms1     |
| 0.461710816  | 1 | 0.000442  | 8 | Bcl2l1    |
| 0.274180444  | 1 | 0.0004434 | 8 | Arhgap35  |
| 0.394127033  | 1 | 0.0004444 | 8 | Pabpn1    |
| 0.337898927  | 1 | 0.00045   | 8 | Plk2      |
| 0.253530873  | 1 | 0.0004504 | 8 | Eif2b4    |
| 0.58055602   | 1 | 0.0004519 | 8 | Bfar      |
| 0.444290551  | 1 | 0.0004553 | 8 | Wdr4      |
| 0.522695713  | 1 | 0.0004595 | 8 | Psmc2     |
| 0.545269801  | 1 | 0.0004603 | 8 | Dpm1      |
| 0.602621818  | 1 | 0.0004662 | 8 | Prr24     |
| 0.263192822  | 1 | 0.0004692 | 8 | Pnp       |



|              |   |           |   |          |
|--------------|---|-----------|---|----------|
| 0.408301521  | 1 | 0.0004713 | 8 | Atp5j    |
| 0.604108928  | 1 | 0.000475  | 8 | Cast     |
| 0.43027193   | 1 | 0.0004784 | 8 | Thbs1    |
| 0.392304581  | 1 | 0.000489  | 8 | Eif4a3   |
| 0.288512982  | 1 | 0.0004926 | 8 | Ugp2     |
| 0.480744089  | 1 | 0.0004931 | 8 | Lrrc59   |
| 0.263388123  | 1 | 0.0004964 | 8 | Cyp27a1  |
| 0.36776584   | 1 | 0.0004974 | 8 | Vps25    |
| 0.309929147  | 1 | 0.0004979 | 8 | Laptm4a  |
| 0.538574852  | 1 | 0.000498  | 8 | Map2k7   |
| 0.549507926  | 1 | 0.0005054 | 8 | Serf1    |
| 0.330374586  | 1 | 0.0005145 | 8 | Carhsp1  |
| 0.363412559  | 1 | 0.0005187 | 8 | Mafg     |
| 0.402467835  | 1 | 0.0005203 | 8 | Dhrs4    |
| 0.32177233   | 1 | 0.0005224 | 8 | Rangap1  |
| 0.306405548  | 1 | 0.0005297 | 8 | Arid4b   |
| 0.484401643  | 1 | 0.0005298 | 8 | Mgat1    |
| 0.341693122  | 1 | 0.0005324 | 8 | Rab43    |
| 0.572624238  | 1 | 0.0005341 | 8 | Zmiz2    |
| 0.34385078   | 1 | 0.0005431 | 8 | Grcc10   |
| 0.39707386   | 1 | 0.0005727 | 8 | Zfp472   |
| 0.392805312  | 1 | 0.0005742 | 8 | Mios     |
| 0.478584322  | 1 | 0.0005784 | 8 | Mocs1    |
| 0.386247756  | 1 | 0.0005874 | 8 | Otud1    |
| 0.482745968  | 1 | 0.0005903 | 8 | Mrpl43   |
| 0.350587735  | 1 | 0.000598  | 8 | Rala     |
| -0.759989535 | 1 | 0.0005987 | 8 | Rps19    |
| 0.715059486  | 1 | 0.0006045 | 8 | Crk      |
| 0.484438419  | 1 | 0.0006077 | 8 | Pbrm1    |
| 0.295407272  | 1 | 0.0006081 | 8 | Gnl3     |
| 0.619800071  | 1 | 0.0006108 | 8 | Rb1      |
| 0.2686259    | 1 | 0.0006136 | 8 | Rc3h1    |
| 0.455767563  | 1 | 0.0006159 | 8 | Vps36    |
| 0.35282269   | 1 | 0.0006264 | 8 | Spen     |
| 0.441118265  | 1 | 0.0006273 | 8 | Elovl1   |
| 0.343619813  | 1 | 0.0006316 | 8 | Prpf39   |
| 0.573222052  | 1 | 0.0006384 | 8 | Atp5d    |
| 0.718602606  | 1 | 0.0006394 | 8 | Dedd2    |
| 0.795455538  | 1 | 0.0006426 | 8 | Parp3    |
| 0.396035762  | 1 | 0.0006498 | 8 | Ppapdc1b |
| 0.519813936  | 1 | 0.0006543 | 8 | Ppp1r10  |
| 0.371362696  | 1 | 0.0006554 | 8 | Tbxas1   |
| 0.422548357  | 1 | 0.0006563 | 8 | Pde4b    |
| 0.387370362  | 1 | 0.0006593 | 8 | Stag2    |
| 0.685091412  | 1 | 0.000664  | 8 | Tiparp   |
| -1.554895772 | 1 | 0.0006818 | 8 | Eif4e    |
| 0.32119781   | 1 | 0.0006838 | 8 | Ids      |
| 0.406215577  | 1 | 0.0006949 | 8 | Icosl    |
| 0.522886339  | 1 | 0.0007016 | 8 | Asph     |
| 0.45009009   | 1 | 0.0007029 | 8 | Sergef   |
| 0.633086007  | 1 | 0.0007035 | 8 | Spg20    |
| 0.461134914  | 1 | 0.0007056 | 8 | Mtm1     |
| -1.430383842 | 1 | 0.0007066 | 8 | Spast    |
| 0.365236185  | 1 | 0.0007195 | 8 | Tmco4    |
| 0.691430895  | 1 | 0.0007222 | 8 | Ppan     |
| 0.429115459  | 1 | 0.0007291 | 8 | Sgsh     |
| 0.332676809  | 1 | 0.0007369 | 8 | Vamp4    |
| 0.346292798  | 1 | 0.0007371 | 8 | Qars     |
| 0.398041048  | 1 | 0.0007442 | 8 | Zyx      |
| 0.763449918  | 1 | 0.0007447 | 8 | Cdk19    |
| 0.737870524  | 1 | 0.0007461 | 8 | Cnst     |

|              |   |           |   |             |
|--------------|---|-----------|---|-------------|
| 0.606703462  | 1 | 0.0007503 | 8 | Dap3        |
| 0.487592131  | 1 | 0.0007554 | 8 | Uspl1       |
| 0.429682655  | 1 | 0.0007668 | 8 | Pcnt        |
| 0.502342253  | 1 | 0.0007729 | 8 | Pnp0        |
| 0.47429188   | 1 | 0.0007735 | 8 | Zfp53       |
| 0.47563596   | 1 | 0.0007738 | 8 | Fryl        |
| 0.273601299  | 1 | 0.0007739 | 8 | Fam65b      |
| 0.468353177  | 1 | 0.0007821 | 8 | Uggt1       |
| -1.518434189 | 1 | 0.0007862 | 8 | Map2k1      |
| -1.427086757 | 1 | 0.0007967 | 8 | Pla2g15     |
| 0.319240443  | 1 | 0.0007974 | 8 | Mrpl47      |
| 0.466872684  | 1 | 0.0008071 | 8 | Mcmbp       |
| 0.266373741  | 1 | 0.0008075 | 8 | NP-904338.1 |
| 0.660672002  | 1 | 0.0008109 | 8 | Hemk1       |
| 0.287562204  | 1 | 0.0008111 | 8 | RbmX        |
| 0.556557761  | 1 | 0.0008143 | 8 | C2cd2l      |
| 0.622518709  | 1 | 0.0008213 | 8 | Il6st       |
| 0.298729236  | 1 | 0.000853  | 8 | Cep250      |
| 0.311641233  | 1 | 0.0008545 | 8 | Cox16       |
| 0.285237083  | 1 | 0.0008622 | 8 | Prdm1       |
| 0.374706109  | 1 | 0.0008634 | 8 | Rab2a       |
| 0.469882151  | 1 | 0.0008786 | 8 | Mak16       |
| 0.328504067  | 1 | 0.000892  | 8 | Sp140       |
| 0.358280081  | 1 | 0.0009018 | 8 | Ndufa8      |
| 0.562719547  | 1 | 0.0009109 | 8 | Arl14ep     |
| 0.499880755  | 1 | 0.0009109 | 8 | Hibch       |
| 0.722567472  | 1 | 0.0009132 | 8 | Rab3d       |
| 0.254387826  | 1 | 0.0009186 | 8 | Chst12      |
| 0.270724697  | 1 | 0.0009226 | 8 | Anp32a      |
| 0.876668359  | 1 | 0.0009228 | 8 | Mus81       |
| 0.524624714  | 1 | 0.0009282 | 8 | Birc5       |
| 0.291443985  | 1 | 0.0009299 | 8 | Dnm1l       |
| 0.319697002  | 1 | 0.0009306 | 8 | Casp2       |
| 0.543374566  | 1 | 0.0009334 | 8 | Dhps        |
| 0.578169196  | 1 | 0.0009403 | 8 | Snx20       |
| 0.262323641  | 1 | 0.0009415 | 8 | Ctnnb1      |
| -1.568429304 | 1 | 0.000942  | 8 | Ythdf3      |
| 0.382268658  | 1 | 0.0009448 | 8 | Suco        |
| 0.250757727  | 1 | 0.0009453 | 8 | Tmbim1      |
| 0.513271901  | 1 | 0.0009477 | 8 | Psmf1       |
| 0.511213296  | 1 | 0.0009482 | 8 | Vkorc1      |
| 0.256910414  | 1 | 0.0009502 | 8 | Dlst        |
| 0.374043149  | 1 | 0.0009656 | 8 | Tmem140     |
| 0.255203521  | 1 | 0.0009706 | 8 | Sema4d      |
| 0.270925148  | 1 | 0.0009895 | 8 | Rab11fip5   |
| 0.254452267  | 1 | 0.0009964 | 8 | Brd2        |
| 0.577692435  | 1 | 0.0009995 | 8 | Jmy         |
| 0.389006256  | 1 | 0.0010001 | 8 | Ttc3        |
| 0.556770238  | 1 | 0.001005  | 8 | Nme6        |
| 0.463602464  | 1 | 0.0010103 | 8 | Smarca2     |
| 0.792097699  | 1 | 0.0010156 | 8 | Tubg1       |
| 0.622633578  | 1 | 0.0010271 | 8 | Diap2       |
| 0.383599865  | 1 | 0.001032  | 8 | Snrk        |
| 0.851926275  | 1 | 0.0010388 | 8 | Usp33       |
| 0.462933115  | 1 | 0.0010402 | 8 | Gpatch4     |
| 0.831045864  | 1 | 0.0010451 | 8 | Serpinb6b   |
| 0.353294515  | 1 | 0.0010511 | 8 | Mettl16     |
| 0.439034923  | 1 | 0.0010566 | 8 | Rftn1       |
| 0.505405556  | 1 | 0.0010753 | 8 | Mtmr1       |
| 0.336049861  | 1 | 0.0010772 | 8 | Cxcl1       |
| 0.486416659  | 1 | 0.0010866 | 8 | Trap1       |

|              |   |           |   |               |
|--------------|---|-----------|---|---------------|
| 0.955413811  | 1 | 0.0010983 | 8 | Smim11        |
| 0.313700133  | 1 | 0.0011    | 8 | Utp6          |
| 0.348530333  | 1 | 0.0011025 | 8 | Pik3c2a       |
| 0.31121257   | 1 | 0.0011071 | 8 | Tfip11        |
| 0.257554062  | 1 | 0.0011141 | 8 | Afg3l2        |
| 0.415476771  | 1 | 0.0011345 | 8 | Ibtk          |
| 0.341861828  | 1 | 0.0011417 | 8 | Gnptg         |
| 0.36317557   | 1 | 0.0011431 | 8 | Aqr           |
| 0.343891357  | 1 | 0.0011475 | 8 | Rab8a         |
| 0.371837192  | 1 | 0.0011479 | 8 | Stag1         |
| 0.348760434  | 1 | 0.0011517 | 8 | Tm7sf3        |
| 0.411165761  | 1 | 0.0011577 | 8 | Carm1         |
| 0.30329469   | 1 | 0.0011593 | 8 | Taf1d         |
| 0.261924769  | 1 | 0.001181  | 8 | 1500012F01Rik |
| 0.524814551  | 1 | 0.0011844 | 8 | Csrp1         |
| 0.379841076  | 1 | 0.0011844 | 8 | Zfp52         |
| -1.553616417 | 1 | 0.0011905 | 8 | Dirc2         |
| 0.276793067  | 1 | 0.0011985 | 8 | Anxa2         |
| 0.257529034  | 1 | 0.0011991 | 8 | Manf          |
| -0.389985506 | 1 | 0.0011996 | 8 | Cyba          |
| 0.254273069  | 1 | 0.0012065 | 8 | Limd1         |
| 0.339300152  | 1 | 0.0012077 | 8 | Nat9          |
| 0.362009463  | 1 | 0.0012148 | 8 | Dapp1         |
| 0.360310663  | 1 | 0.0012154 | 8 | Ndufv2        |
| 0.329620364  | 1 | 0.0012162 | 8 | Wbp2          |
| 0.43699949   | 1 | 0.0012483 | 8 | Morc3         |
| -0.519803388 | 1 | 0.001274  | 8 | Lars2         |
| 0.480362616  | 1 | 0.0012773 | 8 | Plau          |
| 0.468447712  | 1 | 0.0012911 | 8 | Mpp6          |
| 0.429865136  | 1 | 0.0013067 | 8 | Kdm6a         |
| 0.481678661  | 1 | 0.0013077 | 8 | Anxa7         |
| 0.340919074  | 1 | 0.0013234 | 8 | Itch          |
| 0.700020854  | 1 | 0.0013424 | 8 | Slx4          |
| 0.364573249  | 1 | 0.0013674 | 8 | Atp8a1        |
| 0.333721972  | 1 | 0.0013824 | 8 | Eif3d         |
| 0.405192091  | 1 | 0.0014032 | 8 | Kpna3         |
| 0.284515843  | 1 | 0.001409  | 8 | Mbd6          |
| 0.528155481  | 1 | 0.0014153 | 8 | Lrrk2         |
| 0.378134882  | 1 | 0.0014161 | 8 | Fam172a       |
| 0.552374627  | 1 | 0.0014186 | 8 | Ddx41         |
| 0.278112621  | 1 | 0.0014294 | 8 | Dus3l         |
| 0.444143902  | 1 | 0.0014361 | 8 | Stap1         |
| 0.335224845  | 1 | 0.001452  | 8 | Erlin2        |
| 0.411077483  | 1 | 0.0014563 | 8 | Mkl1          |
| 0.906256273  | 1 | 0.0014681 | 8 | Gpaa1         |
| 0.40097498   | 1 | 0.0014888 | 8 | Glrx5         |
| 0.359652328  | 1 | 0.0014982 | 8 | Nupr1         |
| 0.452784467  | 1 | 0.0015018 | 8 | Tysnd1        |
| 0.733340251  | 1 | 0.0015045 | 8 | Thbd          |
| 0.418197781  | 1 | 0.0015359 | 8 | Cdk2          |
| 0.343678371  | 1 | 0.0015427 | 8 | Smox          |
| 0.386516953  | 1 | 0.0015499 | 8 | Tmx4          |
| 0.282498985  | 1 | 0.0015633 | 8 | Park7         |
| 0.352754476  | 1 | 0.0015841 | 8 | Surf2         |
| 0.253809232  | 1 | 0.0015907 | 8 | Khsrp         |
| 0.48503275   | 1 | 0.0015972 | 8 | Smad7         |
| 0.605305584  | 1 | 0.0016089 | 8 | Ccdc23        |
| -0.629137061 | 1 | 0.001615  | 8 | Rps15a        |
| 0.83967319   | 1 | 0.0016197 | 8 | Lipo1         |
| 0.360747692  | 1 | 0.001632  | 8 | Stt3a         |
| 0.610286141  | 1 | 0.0016782 | 8 | Prkar1a       |

|              |   |           |   |               |
|--------------|---|-----------|---|---------------|
| 0.264733579  | 1 | 0.001683  | 8 | Nucb2         |
| 0.372349282  | 1 | 0.0016982 | 8 | Polr2m        |
| 0.359886462  | 1 | 0.001701  | 8 | Lsm6          |
| 0.298950396  | 1 | 0.0017058 | 8 | 0610010F05Rik |
| -1.471177749 | 1 | 0.0017341 | 8 | Clec4n        |
| -0.330526016 | 1 | 0.0017342 | 8 | Tyrobp        |
| 0.554507582  | 1 | 0.0017763 | 8 | Pcyox1        |
| 0.262354039  | 1 | 0.0017816 | 8 | Asxl1         |
| 0.638373453  | 1 | 0.0017884 | 8 | Ado           |
| 0.327140097  | 1 | 0.0017903 | 8 | Bud31         |
| -1.296763235 | 1 | 0.001795  | 8 | Mgat2         |
| 0.566763364  | 1 | 0.0018252 | 8 | Gatsl3        |
| 0.508531137  | 1 | 0.0018331 | 8 | Ube3c         |
| 0.301135582  | 1 | 0.0018412 | 8 | Anapc16       |
| 0.617141545  | 1 | 0.0018571 | 8 | Gm15421       |
| 0.357732585  | 1 | 0.001858  | 8 | Donson        |
| 0.267926082  | 1 | 0.0018594 | 8 | Stom          |
| 0.435957525  | 1 | 0.0018623 | 8 | Tbk1          |
| 0.507495651  | 1 | 0.0018777 | 8 | Mt2           |
| 0.400629435  | 1 | 0.0018836 | 8 | Swi5          |
| -0.278840455 | 1 | 0.001895  | 8 | Calm1         |
| 0.535963544  | 1 | 0.0018955 | 8 | Map2k3        |
| 0.508518634  | 1 | 0.0019236 | 8 | Ap1g1         |
| -0.440421358 | 1 | 0.0019574 | 8 | Arpc5         |
| 0.25485328   | 1 | 0.0019579 | 8 | Riok1         |
| 0.784885928  | 1 | 0.0019699 | 8 | Tmcc3         |
| 0.280791973  | 1 | 0.0019866 | 8 | Lmo4          |
| 0.655848117  | 1 | 0.001988  | 8 | Tmem237       |
| 0.540197647  | 1 | 0.0019981 | 8 | Cr1l          |
| 0.26145106   | 1 | 0.0020473 | 8 | Fxyd2         |
| 0.29824753   | 1 | 0.0020636 | 8 | Snx13         |
| 0.372799222  | 1 | 0.0020766 | 8 | Rac2          |
| 0.450516742  | 1 | 0.0020865 | 8 | Sqrdl         |
| 0.461236915  | 1 | 0.0020964 | 8 | Mphosph6      |
| 0.492195737  | 1 | 0.0021444 | 8 | Procr         |
| 0.362354099  | 1 | 0.0021465 | 8 | Ndufb10       |
| 0.259026817  | 1 | 0.0021607 | 8 | Eps8          |
| 0.284296338  | 1 | 0.0022095 | 8 | Pde1b         |
| 0.457834983  | 1 | 0.0022146 | 8 | Pbxip1        |
| 0.713039988  | 1 | 0.0022476 | 8 | Mlec          |
| 0.688872365  | 1 | 0.0022639 | 8 | Cdc42bpg      |
| 0.331506389  | 1 | 0.0023091 | 8 | Irgq          |
| 0.615227596  | 1 | 0.0023129 | 8 | Higd1a        |
| 1.084609776  | 1 | 0.002313  | 8 | Pofut1        |
| 0.756403445  | 1 | 0.0023263 | 8 | Abhd14a       |
| 0.307681077  | 1 | 0.0023315 | 8 | Tbc1d10b      |
| 0.417408857  | 1 | 0.0023436 | 8 | Bank1         |
| 0.316666137  | 1 | 0.0023606 | 8 | Kansl3        |
| 0.288597045  | 1 | 0.0023885 | 8 | Gatc          |
| 0.401837973  | 1 | 0.0023984 | 8 | Sgcb          |
| 0.491121074  | 1 | 0.0024174 | 8 | Tesk1         |
| 0.407510632  | 1 | 0.0024229 | 8 | Mad2l2        |
| 0.257575086  | 1 | 0.0024427 | 8 | Nin           |
| -0.500720178 | 1 | 0.0024453 | 8 | C1qa          |
| 0.456879636  | 1 | 0.0024801 | 8 | Phf20l1       |
| 0.299113772  | 1 | 0.0025023 | 8 | Sec62         |
| 0.458523946  | 1 | 0.0025124 | 8 | Zfp623        |
| -1.442048421 | 1 | 0.0025145 | 8 | Phf20         |
| 0.38411795   | 1 | 0.0025235 | 8 | Aplp2         |
| 0.330642089  | 1 | 0.0025359 | 8 | Cyfp2         |
| 0.671393604  | 1 | 0.0025499 | 8 | Glcci1        |

|              |   |           |   |               |
|--------------|---|-----------|---|---------------|
| -1.448286037 | 1 | 0.0025881 | 8 | Cacul1        |
| 0.32759249   | 1 | 0.0025924 | 8 | Mrpl35        |
| 0.594746041  | 1 | 0.0026158 | 8 | Adamts10      |
| 0.267942873  | 1 | 0.0026173 | 8 | Serpinb6a     |
| -0.479888841 | 1 | 0.0026228 | 8 | Cybb          |
| 0.546332312  | 1 | 0.0026397 | 8 | Dgkd          |
| 0.325747709  | 1 | 0.0026695 | 8 | Cog1          |
| 1.092995823  | 1 | 0.0026939 | 8 | Tecr          |
| -1.158398114 | 1 | 0.0027157 | 8 | Fcho2         |
| 0.681278524  | 1 | 0.0027222 | 8 | Samm50        |
| 0.26331987   | 1 | 0.0027255 | 8 | Polk          |
| 0.269381233  | 1 | 0.0027294 | 8 | 2410006H16Rik |
| 0.257598391  | 1 | 0.0027482 | 8 | Stk24         |
| 0.363850911  | 1 | 0.002774  | 8 | Mrpl14        |
| 0.258172603  | 1 | 0.0027786 | 8 | Cops5         |
| 0.834332253  | 1 | 0.0028386 | 8 | Per1          |
| 0.373344351  | 1 | 0.0028646 | 8 | Cds2          |
| 0.359910826  | 1 | 0.0029068 | 8 | Zfp217        |
| 0.536972782  | 1 | 0.0029187 | 8 | Ttc12         |
| 0.333039973  | 1 | 0.0029197 | 8 | Esco1         |
| 0.255087523  | 1 | 0.0029396 | 8 | Dph5          |
| 0.396370378  | 1 | 0.00297   | 8 | Rpl22l1       |
| 0.258766094  | 1 | 0.0029759 | 8 | Tbrg1         |
| 0.455154344  | 1 | 0.0029782 | 8 | Tuba1a        |
| 0.534059781  | 1 | 0.0030032 | 8 | Pitpnb        |
| 0.283393372  | 1 | 0.00301   | 8 | Ldha          |
| 0.294179437  | 1 | 0.0030315 | 8 | Helb          |
| 0.390383844  | 1 | 0.0030482 | 8 | Btbd2         |
| 0.745323276  | 1 | 0.0030578 | 8 | Txndc5        |
| 0.30553969   | 1 | 0.0030809 | 8 | Fzr1          |
| 0.365739497  | 1 | 0.0031405 | 8 | Ptms          |
| 0.490194321  | 1 | 0.0031532 | 8 | Hps5          |
| 0.33443942   | 1 | 0.0031954 | 8 | Zfp667        |
| 0.358281343  | 1 | 0.0032049 | 8 | Emc10         |
| 0.695404116  | 1 | 0.0032342 | 8 | Ankrd27       |
| 0.497977481  | 1 | 0.0032421 | 8 | Mtg2          |
| 0.869408911  | 1 | 0.0032644 | 8 | Lypla1        |
| -1.328378381 | 1 | 0.0032729 | 8 | Tssc1         |
| -1.341222866 | 1 | 0.0032732 | 8 | Cat           |
| 0.45539567   | 1 | 0.0033572 | 8 | Vimp          |
| 0.263070494  | 1 | 0.003404  | 8 | Akt3          |
| 0.345767798  | 1 | 0.0034362 | 8 | Hgsnat        |
| 0.852479219  | 1 | 0.0034402 | 8 | Rbbp5         |
| -1.358444203 | 1 | 0.0034848 | 8 | Slc27a1       |
| 0.870303286  | 1 | 0.0034893 | 8 | Urgcp         |
| -1.441621709 | 1 | 0.0035013 | 8 | Usp3          |
| 0.361714725  | 1 | 0.0035454 | 8 | Coa6          |
| 0.515951006  | 1 | 0.0035485 | 8 | Eif2d         |
| 0.478757881  | 1 | 0.0035494 | 8 | Btbd10        |
| 0.459895768  | 1 | 0.0035696 | 8 | Tatdn2        |
| 0.372289895  | 1 | 0.0035705 | 8 | Ccdc86        |
| 0.301763681  | 1 | 0.003601  | 8 | Cers5         |
| 0.580508921  | 1 | 0.0036546 | 8 | Chmp4b        |
| 0.349835006  | 1 | 0.0036864 | 8 | Snap29        |
| 0.602403418  | 1 | 0.0036888 | 8 | Il4ra         |
| 0.380061443  | 1 | 0.0036992 | 8 | Ssb           |
| 0.452659153  | 1 | 0.0037024 | 8 | Cct6a         |
| -1.276943944 | 1 | 0.0037052 | 8 | Fam105a       |
| 0.341295826  | 1 | 0.0037271 | 8 | Bmpr2         |
| 0.447363823  | 1 | 0.0037671 | 8 | Usp2          |
| 0.300861379  | 1 | 0.0038156 | 8 | Pdcd11        |

|              |   |           |   |               |
|--------------|---|-----------|---|---------------|
| 0.37306849   | 1 | 0.0038651 | 8 | Traf5         |
| 0.605912215  | 1 | 0.0038654 | 8 | Igf1r         |
| 0.374342215  | 1 | 0.0039139 | 8 | Irf1          |
| -0.639771218 | 1 | 0.0039591 | 8 | Dazap2        |
| 0.273953358  | 1 | 0.0039626 | 8 | Irf3          |
| 0.307290227  | 1 | 0.0039813 | 8 | S100a13       |
| -1.028561776 | 1 | 0.0039989 | 8 | Imp4          |
| -0.886333477 | 1 | 0.0040049 | 8 | Cebpb         |
| 0.334596832  | 1 | 0.0040272 | 8 | Nfkbid        |
| 0.414296879  | 1 | 0.004058  | 8 | Clp1          |
| -1.41723859  | 1 | 0.004058  | 8 | Cd38          |
| 0.287236052  | 1 | 0.0040953 | 8 | Ywhae         |
| -0.995991679 | 1 | 0.0040982 | 8 | 0610012G03Rik |
| 0.606338359  | 1 | 0.0041165 | 8 | Prcc2a        |
| -0.25890384  | 1 | 0.004127  | 8 | Inpp5k        |
| 0.414672754  | 1 | 0.0041837 | 8 | Pelp1         |
| 0.378475888  | 1 | 0.004213  | 8 | Mllt1         |
| -1.410409813 | 1 | 0.0042157 | 8 | Prosc         |
| -1.113838162 | 1 | 0.0042199 | 8 | Rbm22         |
| -1.259473907 | 1 | 0.0042511 | 8 | Cdc42ep4      |
| 0.867158629  | 1 | 0.0042946 | 8 | Cd22          |
| 0.5999349    | 1 | 0.0043107 | 8 | Clpp          |
| 0.298759109  | 1 | 0.0043147 | 8 | Tmem59        |
| 0.352715521  | 1 | 0.0043177 | 8 | Cinp          |
| 0.269747452  | 1 | 0.0043191 | 8 | Abhd17a       |
| 0.499293442  | 1 | 0.0043212 | 8 | Itgal         |
| -1.416993115 | 1 | 0.0043489 | 8 | Ahcyl2        |
| 0.308170151  | 1 | 0.004353  | 8 | Eid1          |
| 0.297818704  | 1 | 0.0043571 | 8 | Krr1          |
| 0.277106957  | 1 | 0.0044106 | 8 | Tipin         |
| 0.58426298   | 1 | 0.0045152 | 8 | Pdlim2        |
| -1.178274781 | 1 | 0.0045891 | 8 | Trafd1        |
| 0.30624553   | 1 | 0.0047004 | 8 | Wdr33         |
| 0.455224603  | 1 | 0.0047039 | 8 | 2810004N23Rik |
| 0.527290803  | 1 | 0.0047098 | 8 | Mrps10        |
| -1.262179708 | 1 | 0.004713  | 8 | Sowahc        |
| 0.458161355  | 1 | 0.0047392 | 8 | Mylk          |
| -0.609828765 | 1 | 0.0047507 | 8 | Rpl18         |
| -1.230558123 | 1 | 0.0047647 | 8 | Tmem189       |
| -0.267101905 | 1 | 0.0047694 | 8 | Ptger4        |
| 0.903575226  | 1 | 0.00478   | 8 | Sh3bp2        |
| 0.382577056  | 1 | 0.0047926 | 8 | Phxr4         |
| 0.437043324  | 1 | 0.0048047 | 8 | Hps4          |
| -1.357889119 | 1 | 0.0048584 | 8 | Smad1         |
| 0.25838743   | 1 | 0.0049061 | 8 | Rpl7          |
| -0.738529166 | 1 | 0.004936  | 8 | Sat1          |
| -0.405772009 | 1 | 0.0049499 | 8 | Mir682        |
| -1.688442514 | 1 | 0.0050005 | 8 | Pfdn2         |
| -1.307053257 | 1 | 0.0050086 | 8 | Mybbp1a       |
| 0.396764933  | 1 | 0.00511   | 8 | Zfp704        |
| 0.459295553  | 1 | 0.0051407 | 8 | Scmh1         |
| 0.294094434  | 1 | 0.0051961 | 8 | Cox7a2        |
| 0.500130852  | 1 | 0.0052668 | 8 | Mat2b         |
| 0.402695726  | 1 | 0.0052843 | 8 | Ndufs4        |
| -1.54484125  | 1 | 0.0052955 | 8 | Tbc1d1        |
| 0.381650813  | 1 | 0.0052987 | 8 | Coa5          |
| 0.313349946  | 1 | 0.0053013 | 8 | Dnajb1        |
| 0.300413943  | 1 | 0.0053143 | 8 | Rcn2          |
| -1.610649802 | 1 | 0.0053262 | 8 | Dok2          |
| 0.772189484  | 1 | 0.0053409 | 8 | Cp            |
| 2.154119734  | 1 | 0.0054415 | 8 | Smarcd2       |

|              |   |           |   |               |
|--------------|---|-----------|---|---------------|
| -1.104830801 | 1 | 0.005442  | 8 | Irf2bp2       |
| 0.275614279  | 1 | 0.0054452 | 8 | Appl1         |
| -0.463561976 | 1 | 0.0054708 | 8 | Wfdc17        |
| 0.434753519  | 1 | 0.0054807 | 8 | Ppt1          |
| 1.012179439  | 1 | 0.0054982 | 8 | Xpo6          |
| -0.783675923 | 1 | 0.0055072 | 8 | Atp5j2        |
| -0.933453188 | 1 | 0.005512  | 8 | Dnaja1        |
| 0.423957484  | 1 | 0.0055477 | 8 | Dpf2          |
| 0.511552632  | 1 | 0.0055909 | 8 | Agpat6        |
| 0.280930397  | 1 | 0.005627  | 8 | Ptpro         |
| -0.559110099 | 1 | 0.0056448 | 8 | Tpd52         |
| -0.763152062 | 1 | 0.0056555 | 8 | Cyth4         |
| 0.39034989   | 1 | 0.005668  | 8 | Nrm           |
| 0.277728881  | 1 | 0.0056766 | 8 | Snrpe         |
| 0.367332905  | 1 | 0.0056845 | 8 | Wdtdc1        |
| 0.451285321  | 1 | 0.0057231 | 8 | Elf1          |
| -0.656002924 | 1 | 0.0057389 | 8 | Unc93b1       |
| 1.098191545  | 1 | 0.005765  | 8 | 1500011K16Rik |
| 0.294863432  | 1 | 0.0060988 | 8 | Hook2         |
| -1.358129417 | 1 | 0.0061107 | 8 | Atg13         |
| 0.270702312  | 1 | 0.0061263 | 8 | Myo1e         |
| 0.566402173  | 1 | 0.0061386 | 8 | Mllt4         |
| 0.476688399  | 1 | 0.0061548 | 8 | Scaper        |
| 0.517631678  | 1 | 0.006165  | 8 | Pim1          |
| 0.465943544  | 1 | 0.0062224 | 8 | Rbm39         |
| -1.026570606 | 1 | 0.0063388 | 8 | Sarnp         |
| 0.260293402  | 1 | 0.0063868 | 8 | H13           |
| 0.298187459  | 1 | 0.0064045 | 8 | Rbm15         |
| -1.088165468 | 1 | 0.0066284 | 8 | Lhfp12        |
| 0.303988458  | 1 | 0.0066606 | 8 | Igsf8         |
| -1.315624123 | 1 | 0.0066709 | 8 | Gtf2f2        |
| -1.247652769 | 1 | 0.0067055 | 8 | Cxcr4         |
| 0.256199985  | 1 | 0.0067313 | 8 | Pilra         |
| 0.254901398  | 1 | 0.0067408 | 8 | Nr4a1         |
| 0.265921811  | 1 | 0.0067821 | 8 | Tmco3         |
| -1.360948601 | 1 | 0.0067854 | 8 | Kdm1a         |
| 0.259122579  | 1 | 0.0067937 | 8 | Traf3         |
| 0.289734361  | 1 | 0.0069459 | 8 | Dad1          |
| 0.378416575  | 1 | 0.0070004 | 8 | Nqo2          |
| 0.388041632  | 1 | 0.0070318 | 8 | Brd3          |
| 0.327194069  | 1 | 0.007076  | 8 | Ndufs7        |
| -1.272028027 | 1 | 0.0071252 | 8 | Gng2          |
| -1.511318558 | 1 | 0.0071257 | 8 | Gramd3        |
| -1.43512942  | 1 | 0.0071523 | 8 | Abcc1         |
| 0.280226627  | 1 | 0.0071829 | 8 | Cep83         |
| 0.250493533  | 1 | 0.0072613 | 8 | Jmjd6         |
| 0.390247188  | 1 | 0.0072681 | 8 | Rab3gap1      |
| 0.349506069  | 1 | 0.0072731 | 8 | Mocs2         |
| 0.490309518  | 1 | 0.0073834 | 8 | 0610037L13Rik |
| 0.45739842   | 1 | 0.0073842 | 8 | Slc6a8        |
| -0.31666322  | 1 | 0.0073868 | 8 | Brix1         |
| -0.448235691 | 1 | 0.0073887 | 8 | Mir692-1      |
| -1.27895419  | 1 | 0.0074681 | 8 | Psen2         |
| 0.616403507  | 1 | 0.0074697 | 8 | Rpl3          |
| 0.556736155  | 1 | 0.0075125 | 8 | Bambi         |
| -0.44899547  | 1 | 0.0075721 | 8 | Sdcbp         |
| 0.629155254  | 1 | 0.0076065 | 8 | Tiam1         |
| 0.430460378  | 1 | 0.007614  | 8 | Morf4l1       |
| -0.551337493 | 1 | 0.0076372 | 8 | Arpc4         |
| 0.464784713  | 1 | 0.0076389 | 8 | Cox10         |
| 0.301643119  | 1 | 0.0076477 | 8 | Bbx           |

|              |           |           |   |               |
|--------------|-----------|-----------|---|---------------|
| 0.419704486  | 1         | 0.0077005 | 8 | Mcm2          |
| -1.242221724 | 1         | 0.0077154 | 8 | Cldn25        |
| -1.370889627 | 1         | 0.0077972 | 8 | Cherp         |
| 0.298762349  | 1         | 0.0078552 | 8 | Ddx21         |
| 1.038242921  | 1         | 0.0078618 | 8 | Cfb           |
| -0.602609563 | 1         | 0.0078671 | 8 | Gm6251        |
| 0.376606157  | 1         | 0.0080041 | 8 | 4932438A13Rik |
| 0.259270281  | 1         | 0.0080303 | 8 | Myeov2        |
| -0.579427298 | 1         | 0.0080482 | 8 | Rps18         |
| 0.255893     | 1         | 0.0081032 | 8 | Ubxn6         |
| -1.319298042 | 1         | 0.0081208 | 8 | Pou2f2        |
| -1.198356684 | 1         | 0.0081741 | 8 | Pofut2        |
| -1.329981738 | 1         | 0.0081822 | 8 | Cyb561d2      |
| 0.257510133  | 1         | 0.0082951 | 8 | Huwe1         |
| 0.280842216  | 1         | 0.0083561 | 8 | Rbbp8         |
| -0.310022029 | 1         | 0.0083662 | 8 | Pkp4          |
| 0.420196964  | 1         | 0.0083998 | 8 | Tbcd          |
| -1.206070892 | 1         | 0.0084105 | 8 | Fabp5         |
| -0.554884574 | 1         | 0.0084554 | 8 | Actr2         |
| -1.186959045 | 1         | 0.0085234 | 8 | Kat6a         |
| 0.352319559  | 1         | 0.0085407 | 8 | Rev3l         |
| 0.259287607  | 1         | 0.0085545 | 8 | Abr           |
| -1.431756735 | 1         | 0.0085681 | 8 | Pet100        |
| 0.251382948  | 1         | 0.0085872 | 8 | Ifi27         |
| 0.441348373  | 1         | 0.0086441 | 8 | Taldo1        |
| 0.663606339  | 1         | 0.0087646 | 8 | Atxn7l3b      |
| 0.582745725  | 1         | 0.0088038 | 8 | Zfp236        |
| 0.255411745  | 1         | 0.0088235 | 8 | Ppm1a         |
| -0.830137552 | 1         | 0.0088843 | 8 | Tgif1         |
| 0.311941699  | 1         | 0.0089352 | 8 | Mpv17         |
| 0.409126692  | 1         | 0.0089927 | 8 | Aptx          |
| 0.505159886  | 1         | 0.0090649 | 8 | Tacc3         |
| -1.04015344  | 1         | 0.009135  | 8 | Thoc6         |
| 0.447210055  | 1         | 0.0091594 | 8 | 9030617O03Rik |
| 0.2934377    | 1         | 0.0092329 | 8 | Dcaf11        |
| -0.343401682 | 1         | 0.0092941 | 8 | C1qc          |
| 1.040271118  | 1         | 0.0093727 | 8 | Rbbp6         |
| 0.27418589   | 1         | 0.0094087 | 8 | B3gnt1        |
| -1.14808447  | 1         | 0.0094328 | 8 | Slc15a4       |
| -0.266193379 | 1         | 0.0094481 | 8 | Slc30a9       |
| -1.316692169 | 1         | 0.0094576 | 8 | Srp72         |
| 0.279313823  | 1         | 0.009601  | 8 | Nt5dc3        |
| 0.325033125  | 1         | 0.0096554 | 8 | Vps35         |
| 0.839032484  | 1         | 0.0097059 | 8 | Prnp          |
| 0.331831857  | 1         | 0.0098365 | 8 | Akap10        |
| 0.397497664  | 1         | 0.0098573 | 8 | Hiat1         |
| 0.690231226  | 1         | 0.0098745 | 8 | Baz2b         |
| -1.088837479 | 1         | 0.0099105 | 8 | Cpt1a         |
| -1.090377743 | 1         | 0.0099592 | 8 | Tra2b         |
| 1.708736591  | 5.00E-104 | 3.74E-108 | 9 | Smyd1         |
| 1.431223517  | 4.07E-100 | 3.05E-104 | 9 | E230025N22Rik |
| 1.355748808  | 1.18E-99  | 8.87E-104 | 9 | Klk1          |
| 2.074949266  | 1.08E-98  | 8.12E-103 | 9 | B4galt2       |
| 2.088530546  | 2.13E-91  | 1.60E-95  | 9 | Nrxn2         |
| 1.473657479  | 7.23E-83  | 5.41E-87  | 9 | Klf8          |
| 1.871945948  | 9.07E-81  | 6.79E-85  | 9 | Gm1673        |
| 1.7401716    | 9.98E-80  | 7.48E-84  | 9 | Al464131      |
| 1.761123648  | 1.80E-77  | 1.35E-81  | 9 | Rad54b        |
| 1.308448679  | 1.97E-75  | 1.48E-79  | 9 | Crybb3        |
| 1.374680792  | 1.32E-73  | 9.89E-78  | 9 | Spaca1        |
| 2.19266843   | 1.97E-68  | 1.47E-72  | 9 | Map6          |



|             |          |          |   |               |
|-------------|----------|----------|---|---------------|
| 1.419729137 | 1.64E-67 | 1.23E-71 | 9 | Havcr1        |
| 1.401295436 | 3.26E-64 | 2.44E-68 | 9 | Bahcc1        |
| 1.368296964 | 6.55E-62 | 4.91E-66 | 9 | Polq          |
| 2.364100334 | 8.69E-62 | 6.51E-66 | 9 | Ccne2         |
| 1.481261429 | 9.13E-62 | 6.84E-66 | 9 | Esco2         |
| 2.94636572  | 2.13E-59 | 1.59E-63 | 9 | Tcf19         |
| 1.732122037 | 3.74E-56 | 2.80E-60 | 9 | Rad51ap1      |
| 0.993884867 | 3.07E-55 | 2.30E-59 | 9 | Lipn          |
| 1.010406744 | 1.05E-53 | 7.87E-58 | 9 | Casq1         |
| 1.588805467 | 1.69E-53 | 1.26E-57 | 9 | Pole          |
| 1.587258677 | 3.66E-53 | 2.74E-57 | 9 | Ccne1         |
| 2.374029195 | 1.20E-52 | 9.00E-57 | 9 | Gdpd5         |
| 3.083234271 | 4.53E-52 | 3.39E-56 | 9 | Gins1         |
| 1.376604711 | 8.77E-52 | 6.57E-56 | 9 | Mcm8          |
| 1.39579901  | 2.07E-51 | 1.55E-55 | 9 | Calhm2        |
| 1.897764938 | 4.83E-51 | 3.62E-55 | 9 | Telo2         |
| 1.531962532 | 2.76E-50 | 2.06E-54 | 9 | Foxd2os       |
| 0.8017515   | 1.03E-49 | 7.71E-54 | 9 | Bpifa6        |
| 0.998923364 | 2.59E-49 | 1.94E-53 | 9 | Lrp11         |
| 1.320015604 | 6.54E-49 | 4.90E-53 | 9 | Gtse1         |
| 1.359205073 | 1.21E-47 | 9.03E-52 | 9 | Trmt44        |
| 1.236530772 | 3.33E-47 | 2.49E-51 | 9 | Npnt          |
| 2.156129691 | 4.45E-47 | 3.33E-51 | 9 | Rnf121        |
| 1.838003204 | 4.90E-47 | 3.67E-51 | 9 | D6Ertd527e    |
| 1.220878278 | 1.25E-46 | 9.36E-51 | 9 | Fads2         |
| 1.962263188 | 4.46E-45 | 3.34E-49 | 9 | Chaf1a        |
| 1.644476538 | 5.20E-45 | 3.89E-49 | 9 | C78339        |
| 1.717767684 | 5.84E-45 | 4.37E-49 | 9 | Bend6         |
| 1.705222683 | 4.86E-44 | 3.64E-48 | 9 | Spib          |
| 1.720051145 | 1.07E-43 | 7.98E-48 | 9 | Cyp20a1       |
| 1.283498688 | 1.13E-43 | 8.46E-48 | 9 | Tonsl         |
| 1.647562814 | 6.85E-43 | 5.13E-47 | 9 | 1110051M20Rik |
| 1.410753149 | 1.91E-42 | 1.43E-46 | 9 | A430033K04Rik |
| 1.928032692 | 6.05E-42 | 4.53E-46 | 9 | Gm16039       |
| 1.927450133 | 7.13E-42 | 5.34E-46 | 9 | Prss46        |
| 2.166761406 | 7.14E-42 | 5.35E-46 | 9 | Col4a1        |
| 1.465649408 | 7.38E-42 | 5.52E-46 | 9 | Hmga2         |
| 0.763623228 | 3.87E-41 | 2.90E-45 | 9 | Gucy1b3       |
| 1.308503502 | 6.48E-41 | 4.86E-45 | 9 | Gemin6        |
| 1.88186903  | 1.32E-40 | 9.90E-45 | 9 | Athl1         |
| 1.303254146 | 2.03E-40 | 1.52E-44 | 9 | Chtf18        |
| 1.636353288 | 5.09E-40 | 3.81E-44 | 9 | Lipt2         |
| 1.557763014 | 5.09E-40 | 3.81E-44 | 9 | Gm20748       |
| 1.900477306 | 9.70E-40 | 7.27E-44 | 9 | Csrnp2        |
| 1.729261594 | 1.94E-39 | 1.45E-43 | 9 | Fam219a       |
| 1.297730939 | 2.98E-39 | 2.23E-43 | 9 | 2200002D01Rik |
| 1.646989131 | 5.09E-39 | 3.82E-43 | 9 | Tmem107       |
| 1.42671551  | 1.97E-38 | 1.47E-42 | 9 | 1110008L16Rik |
| 2.506614213 | 2.36E-38 | 1.77E-42 | 9 | Sep.03        |
| 1.51363786  | 1.14E-37 | 8.51E-42 | 9 | Dgat2         |
| 1.996804147 | 1.24E-37 | 9.29E-42 | 9 | Spryd4        |
| 1.889460695 | 4.68E-37 | 3.51E-41 | 9 | Dcaf4         |
| 1.159339207 | 5.48E-37 | 4.10E-41 | 9 | Tbx21         |
| 1.365562616 | 5.57E-37 | 4.17E-41 | 9 | Zdhhc2        |
| 1.264400948 | 7.30E-37 | 5.47E-41 | 9 | Gm614         |
| 1.157364873 | 1.17E-36 | 8.76E-41 | 9 | Ap5b1         |
| 1.353239396 | 2.65E-36 | 1.99E-40 | 9 | Hectd2        |
| 1.554137338 | 3.74E-36 | 2.80E-40 | 9 | Heatr2        |
| 2.087796633 | 1.22E-35 | 9.17E-40 | 9 | Gm16515       |
| 1.483198711 | 4.81E-35 | 3.60E-39 | 9 | Bcl9          |
| 2.689163096 | 6.98E-35 | 5.23E-39 | 9 | Bend4         |

|             |          |          |   |               |
|-------------|----------|----------|---|---------------|
| 1.069072266 | 9.16E-35 | 6.86E-39 | 9 | Zfp873        |
| 2.439727733 | 1.20E-34 | 8.98E-39 | 9 | Cspg4         |
| 2.401895045 | 2.89E-34 | 2.16E-38 | 9 | Chaf1b        |
| 2.115558483 | 4.07E-34 | 3.05E-38 | 9 | Tex9          |
| 1.236008    | 6.08E-34 | 4.55E-38 | 9 | Wdr60         |
| 1.972169642 | 7.20E-34 | 5.39E-38 | 9 | Pgm2          |
| 0.680596843 | 1.11E-33 | 8.35E-38 | 9 | Tmem52b       |
| 1.112244437 | 7.84E-33 | 5.87E-37 | 9 | Angpt2        |
| 1.344937508 | 8.54E-33 | 6.39E-37 | 9 | Accs          |
| 2.192182648 | 1.46E-32 | 1.09E-36 | 9 | Ccr9          |
| 2.117455313 | 1.86E-32 | 1.39E-36 | 9 | Asf1b         |
| 1.643510647 | 2.67E-32 | 2.00E-36 | 9 | Gnb1l         |
| 1.728789375 | 4.05E-32 | 3.03E-36 | 9 | Gpr180        |
| 1.279589194 | 7.77E-32 | 5.82E-36 | 9 | Lix1          |
| 1.138938891 | 2.22E-31 | 1.67E-35 | 9 | Fsd1l         |
| 1.258971758 | 2.70E-31 | 2.02E-35 | 9 | Zfp408        |
| 1.387481614 | 3.20E-31 | 2.40E-35 | 9 | Aasdh         |
| 2.377308997 | 4.55E-31 | 3.41E-35 | 9 | E2f2          |
| 1.492635908 | 8.74E-31 | 6.54E-35 | 9 | BC017158      |
| 1.513909004 | 1.27E-30 | 9.54E-35 | 9 | Ankrd32       |
| 1.850512053 | 4.66E-30 | 3.49E-34 | 9 | Ndc1          |
| 1.393682428 | 9.78E-30 | 7.33E-34 | 9 | Cdhr3         |
| 2.423559927 | 1.24E-29 | 9.31E-34 | 9 | Cenpm         |
| 1.394727835 | 1.27E-29 | 9.52E-34 | 9 | Abcb9         |
| 1.483416956 | 1.77E-29 | 1.33E-33 | 9 | Rmdn1         |
| 1.666482554 | 2.91E-29 | 2.18E-33 | 9 | Trmu          |
| 1.536873399 | 2.93E-29 | 2.19E-33 | 9 | Areg          |
| 0.963556987 | 4.68E-29 | 3.51E-33 | 9 | Tmem144       |
| 1.117404788 | 6.53E-29 | 4.89E-33 | 9 | 4930427A07Rik |
| 1.150158815 | 1.04E-28 | 7.76E-33 | 9 | Cpt2          |
| 1.249087548 | 1.10E-28 | 8.20E-33 | 9 | Stbd1         |
| 1.722010009 | 3.58E-28 | 2.68E-32 | 9 | Rab34         |
| 1.64642509  | 4.34E-28 | 3.25E-32 | 9 | Wdr86         |
| 1.803833118 | 7.13E-28 | 5.34E-32 | 9 | Zfp597        |
| 1.155490458 | 1.02E-27 | 7.64E-32 | 9 | Nup43         |
| 1.473927601 | 1.17E-27 | 8.77E-32 | 9 | Dtl           |
| 1.101662328 | 1.86E-27 | 1.40E-31 | 9 | Fam189a2      |
| 1.423306959 | 4.77E-27 | 3.57E-31 | 9 | Ffar2         |
| 1.482047902 | 7.02E-27 | 5.26E-31 | 9 | BC027231      |
| 1.899677522 | 1.03E-26 | 7.68E-31 | 9 | Tmem263       |
| 1.826309517 | 1.21E-26 | 9.09E-31 | 9 | Mpi           |
| 1.4445129   | 1.32E-26 | 9.86E-31 | 9 | Ptgfrn        |
| 1.324418957 | 3.16E-26 | 2.37E-30 | 9 | Lrrc42        |
| 1.485334894 | 7.19E-26 | 5.39E-30 | 9 | Bub1b         |
| 1.660373696 | 1.07E-25 | 8.02E-30 | 9 | Asb2          |
| 1.522268777 | 1.46E-25 | 1.09E-29 | 9 | Dut           |
| 1.180771442 | 4.83E-25 | 3.62E-29 | 9 | 1810055G02Rik |
| 0.704031131 | 5.79E-25 | 4.34E-29 | 9 | Hoxa7         |
| 1.806940805 | 6.34E-25 | 4.75E-29 | 9 | Cox6a2        |
| 1.855845399 | 7.67E-25 | 5.75E-29 | 9 | Map2k5        |
| 1.012957693 | 8.49E-25 | 6.36E-29 | 9 | Txnrd3        |
| 1.909134266 | 9.46E-25 | 7.08E-29 | 9 | Cd109         |
| 1.168765648 | 9.92E-25 | 7.43E-29 | 9 | Gpr85         |
| 1.059179357 | 1.42E-24 | 1.06E-28 | 9 | Ccsap         |
| 1.268179239 | 1.42E-24 | 1.07E-28 | 9 | Spata2l       |
| 1.793645888 | 3.55E-24 | 2.66E-28 | 9 | Ssx2ip        |
| 1.957261509 | 3.56E-24 | 2.67E-28 | 9 | Gm14005       |
| 1.361970303 | 3.93E-24 | 2.94E-28 | 9 | Tmem126b      |
| 1.709107563 | 4.34E-24 | 3.25E-28 | 9 | Diap3         |
| 1.774663437 | 4.58E-24 | 3.43E-28 | 9 | Rpa2          |
| 2.056040377 | 8.30E-24 | 6.21E-28 | 9 | Dcbld2        |

|             |          |          |   |               |
|-------------|----------|----------|---|---------------|
| 1.057921756 | 9.15E-24 | 6.86E-28 | 9 | Nanos1        |
| 1.604492698 | 1.32E-23 | 9.87E-28 | 9 | Homer3        |
| 1.107103038 | 1.69E-23 | 1.27E-27 | 9 | Hist1h4h      |
| 1.377472275 | 1.94E-23 | 1.45E-27 | 9 | Mcm4          |
| 1.337366916 | 2.30E-23 | 1.73E-27 | 9 | Fam65a        |
| 1.363069104 | 3.07E-23 | 2.30E-27 | 9 | Noc4l         |
| 1.652903821 | 3.10E-23 | 2.32E-27 | 9 | Lrrc28        |
| 1.429260583 | 3.19E-23 | 2.39E-27 | 9 | Fbrsl1        |
| 1.332433248 | 4.71E-23 | 3.53E-27 | 9 | Clpb          |
| 1.387212725 | 4.72E-23 | 3.54E-27 | 9 | Pex26         |
| 1.271676037 | 1.04E-22 | 7.78E-27 | 9 | Chchd6        |
| 1.505614841 | 1.12E-22 | 8.37E-27 | 9 | Gins2         |
| 1.742450202 | 1.52E-22 | 1.14E-26 | 9 | Usp1          |
| 1.81034159  | 2.31E-22 | 1.73E-26 | 9 | Psat1         |
| 1.042735703 | 2.38E-22 | 1.79E-26 | 9 | Mtbp          |
| 1.084631471 | 2.69E-22 | 2.01E-26 | 9 | Ube2e2        |
| 1.694165983 | 3.97E-22 | 2.97E-26 | 9 | Aig1          |
| 0.838598071 | 5.21E-22 | 3.91E-26 | 9 | Hist2h2be     |
| 0.986177331 | 7.35E-22 | 5.51E-26 | 9 | Pfkfb2        |
| 1.321546218 | 8.16E-22 | 6.11E-26 | 9 | Morn2         |
| 1.239682894 | 1.01E-21 | 7.54E-26 | 9 | Tpm2          |
| 2.112876318 | 1.03E-21 | 7.70E-26 | 9 | Stambp        |
| 1.394355465 | 1.38E-21 | 1.03E-25 | 9 | Ccdc91        |
| 1.359041605 | 2.03E-21 | 1.52E-25 | 9 | MIh1          |
| 1.877925613 | 2.24E-21 | 1.68E-25 | 9 | Pnpla6        |
| 0.5442604   | 7.65E-21 | 5.73E-25 | 9 | Ttc30a1       |
| 1.255426086 | 8.26E-21 | 6.19E-25 | 9 | Zfp771        |
| 1.462490997 | 1.06E-20 | 7.91E-25 | 9 | Ezh2          |
| 1.189941043 | 1.25E-20 | 9.36E-25 | 9 | Pigo          |
| 1.412611669 | 1.56E-20 | 1.17E-24 | 9 | Lyrm9         |
| 1.697647707 | 1.62E-20 | 1.21E-24 | 9 | Haus4         |
| 2.447511163 | 2.12E-20 | 1.59E-24 | 9 | Tprkb         |
| 1.549909622 | 2.48E-20 | 1.86E-24 | 9 | 3110040N11Rik |
| 1.415737116 | 3.01E-20 | 2.25E-24 | 9 | Ttpal         |
| 1.945066889 | 3.12E-20 | 2.33E-24 | 9 | Pmm1          |
| 0.980918187 | 3.21E-20 | 2.40E-24 | 9 | Loxl3         |
| 0.558246642 | 3.34E-20 | 2.50E-24 | 9 | Mapk13        |
| 1.542622976 | 4.41E-20 | 3.30E-24 | 9 | Dnah2         |
| 0.991424537 | 4.45E-20 | 3.33E-24 | 9 | Tatdn3        |
| 1.414092877 | 5.42E-20 | 4.06E-24 | 9 | Vti1a         |
| 1.131515291 | 5.79E-20 | 4.33E-24 | 9 | Figl1         |
| 1.380109938 | 7.60E-20 | 5.69E-24 | 9 | Tstd3         |
| 1.047099672 | 9.17E-20 | 6.87E-24 | 9 | Mcm10         |
| 1.129092853 | 1.14E-19 | 8.51E-24 | 9 | Dnmbp         |
| 1.851705371 | 1.28E-19 | 9.61E-24 | 9 | Ncapg         |
| 1.235557441 | 1.57E-19 | 1.18E-23 | 9 | Xcr1          |
| 1.40423996  | 1.86E-19 | 1.39E-23 | 9 | Rfc4          |
| 0.974924615 | 1.98E-19 | 1.48E-23 | 9 | Arhgef5       |
| 1.51729017  | 2.37E-19 | 1.78E-23 | 9 | Ccdc163       |
| 0.889100886 | 2.71E-19 | 2.03E-23 | 9 | Fancg         |
| 1.487726488 | 3.65E-19 | 2.74E-23 | 9 | Cdc37l1       |
| 1.75879934  | 3.76E-19 | 2.82E-23 | 9 | Ubl4          |
| 1.181793568 | 3.85E-19 | 2.88E-23 | 9 | Dnph1         |
| 1.318250492 | 4.25E-19 | 3.19E-23 | 9 | Cenpv         |
| 1.283927596 | 4.61E-19 | 3.45E-23 | 9 | Ada           |
| 1.388208695 | 4.65E-19 | 3.48E-23 | 9 | Zranb3        |
| 1.67073966  | 4.82E-19 | 3.61E-23 | 9 | Gmnn          |
| 1.62364457  | 5.31E-19 | 3.97E-23 | 9 | Mcm5          |
| 1.187800756 | 6.20E-19 | 4.64E-23 | 9 | Mcat          |
| 0.662866142 | 7.47E-19 | 5.59E-23 | 9 | Dscc1         |
| 1.771127024 | 1.20E-18 | 8.99E-23 | 9 | Flnb          |

|             |          |          |   |               |
|-------------|----------|----------|---|---------------|
| 2.667145978 | 1.73E-18 | 1.30E-22 | 9 | Npy           |
| 0.924607575 | 1.74E-18 | 1.31E-22 | 9 | Gcfc2         |
| 1.180332838 | 2.17E-18 | 1.62E-22 | 9 | Mpp7          |
| 1.645233965 | 2.45E-18 | 1.84E-22 | 9 | Smyd2         |
| 1.529964967 | 2.95E-18 | 2.21E-22 | 9 | 2210015D19Rik |
| 0.986822494 | 3.17E-18 | 2.37E-22 | 9 | Nmrk1         |
| 1.287455932 | 3.21E-18 | 2.40E-22 | 9 | Tipin         |
| 1.046251705 | 3.63E-18 | 2.72E-22 | 9 | Lrp4          |
| 1.081188648 | 5.49E-18 | 4.11E-22 | 9 | Ints5         |
| 1.289260942 | 8.68E-18 | 6.50E-22 | 9 | Scrib         |
| 1.285437577 | 9.68E-18 | 7.25E-22 | 9 | Slc27a4       |
| 1.203577716 | 9.76E-18 | 7.31E-22 | 9 | E2f6          |
| 1.1525687   | 1.38E-17 | 1.03E-21 | 9 | Ctdspl        |
| 1.658421153 | 1.84E-17 | 1.37E-21 | 9 | Usp38         |
| 1.947141785 | 1.84E-17 | 1.38E-21 | 9 | Ivd           |
| 1.028045087 | 1.94E-17 | 1.45E-21 | 9 | Rbm43         |
| 1.107549593 | 1.96E-17 | 1.47E-21 | 9 | Ttc37         |
| 0.890691976 | 2.11E-17 | 1.58E-21 | 9 | 2700099C18Rik |
| 1.439819099 | 2.20E-17 | 1.64E-21 | 9 | Vps16         |
| 1.88054434  | 2.26E-17 | 1.69E-21 | 9 | Snap47        |
| 0.930009645 | 2.52E-17 | 1.89E-21 | 9 | MIkl          |
| 1.438681551 | 2.55E-17 | 1.91E-21 | 9 | Lrrc75a       |
| 1.694045276 | 2.82E-17 | 2.11E-21 | 9 | Abhd11        |
| 1.316513778 | 3.03E-17 | 2.27E-21 | 9 | Ptges3l       |
| 1.106147743 | 3.06E-17 | 2.29E-21 | 9 | Cd34          |
| 1.443076501 | 3.24E-17 | 2.42E-21 | 9 | Btbd2         |
| 1.270559788 | 3.32E-17 | 2.49E-21 | 9 | Srr           |
| 1.461874759 | 3.47E-17 | 2.60E-21 | 9 | Prim2         |
| 1.537558642 | 3.81E-17 | 2.85E-21 | 9 | Carm1         |
| 1.345085594 | 3.98E-17 | 2.98E-21 | 9 | Rbl1          |
| 1.264691539 | 4.78E-17 | 3.58E-21 | 9 | Mib2          |
| 1.953863528 | 5.22E-17 | 3.91E-21 | 9 | Clcc1         |
| 1.220686934 | 6.50E-17 | 4.87E-21 | 9 | Dxo           |
| 1.133215972 | 6.91E-17 | 5.17E-21 | 9 | R74862        |
| 1.485750238 | 7.63E-17 | 5.71E-21 | 9 | Map3k9        |
| 1.702719605 | 8.98E-17 | 6.72E-21 | 9 | Prkar2a       |
| 1.526612882 | 9.72E-17 | 7.28E-21 | 9 | 5730408K05Rik |
| 1.32726391  | 1.00E-16 | 7.49E-21 | 9 | Timp1         |
| 1.48242584  | 1.00E-16 | 7.51E-21 | 9 | Pmvk          |
| 1.033997693 | 1.07E-16 | 8.00E-21 | 9 | Plxdc1        |
| 0.827784462 | 1.33E-16 | 9.99E-21 | 9 | Orc5          |
| 1.125520788 | 1.46E-16 | 1.09E-20 | 9 | Gmppb         |
| 1.22673244  | 1.46E-16 | 1.10E-20 | 9 | E230008N13Rik |
| 1.301202093 | 1.63E-16 | 1.22E-20 | 9 | Ece1          |
| 1.189175919 | 1.69E-16 | 1.27E-20 | 9 | Dyrk2         |
| 1.643845925 | 1.87E-16 | 1.40E-20 | 9 | Ctu2          |
| 1.408549262 | 2.01E-16 | 1.50E-20 | 9 | Mad2l1        |
| 1.035849495 | 2.02E-16 | 1.51E-20 | 9 | Col4a2        |
| 1.443891386 | 3.42E-16 | 2.56E-20 | 9 | Cse1l         |
| 1.266858594 | 3.48E-16 | 2.61E-20 | 9 | Psmg1         |
| 1.807952439 | 4.22E-16 | 3.16E-20 | 9 | Cds1          |
| 1.200797835 | 4.26E-16 | 3.19E-20 | 9 | Nup210        |
| 0.738039752 | 4.35E-16 | 3.25E-20 | 9 | Fastkd5       |
| 1.1220606   | 4.52E-16 | 3.39E-20 | 9 | 1810034E14Rik |
| 1.25282112  | 4.90E-16 | 3.67E-20 | 9 | Nup160        |
| 1.180373627 | 5.04E-16 | 3.78E-20 | 9 | Espl1         |
| 0.99360925  | 5.18E-16 | 3.88E-20 | 9 | Rad51d        |
| 0.721887112 | 5.82E-16 | 4.36E-20 | 9 | MIst8         |
| 1.026312368 | 9.74E-16 | 7.30E-20 | 9 | Runx2         |
| 1.843019778 | 1.05E-15 | 7.84E-20 | 9 | Tmem63a       |
| 0.857763172 | 1.09E-15 | 8.18E-20 | 9 | Traf4         |

|             |          |          |   |               |
|-------------|----------|----------|---|---------------|
| 1.532937227 | 1.14E-15 | 8.52E-20 | 9 | A530064D06Rik |
| 1.305096671 | 1.24E-15 | 9.27E-20 | 9 | Casp2         |
| 0.774463443 | 1.27E-15 | 9.55E-20 | 9 | Rad51         |
| 1.311346876 | 1.45E-15 | 1.08E-19 | 9 | Polr1e        |
| 0.923605657 | 1.47E-15 | 1.10E-19 | 9 | Gbe1          |
| 1.61903624  | 1.93E-15 | 1.45E-19 | 9 | Riok1         |
| 1.415482846 | 2.49E-15 | 1.87E-19 | 9 | Tmed8         |
| 0.684960282 | 2.64E-15 | 1.98E-19 | 9 | Zfp951        |
| 1.360836118 | 2.98E-15 | 2.23E-19 | 9 | Aaas          |
| 1.065999703 | 3.25E-15 | 2.44E-19 | 9 | Apitd1        |
| 1.405544502 | 3.31E-15 | 2.48E-19 | 9 | Slc25a44      |
| 1.560072932 | 3.34E-15 | 2.50E-19 | 9 | Fert2         |
| 0.986449341 | 3.92E-15 | 2.93E-19 | 9 | Zfp959        |
| 1.100025586 | 4.26E-15 | 3.19E-19 | 9 | Hn1l          |
| 1.489215422 | 4.33E-15 | 3.25E-19 | 9 | Zyg11b        |
| 1.571984179 | 4.72E-15 | 3.53E-19 | 9 | Gm3219        |
| 1.779425231 | 6.00E-15 | 4.49E-19 | 9 | H2-Oa         |
| 1.898731467 | 6.34E-15 | 4.75E-19 | 9 | Dctpp1        |
| 0.904298747 | 6.82E-15 | 5.11E-19 | 9 | Cenph         |
| 1.073013533 | 7.24E-15 | 5.42E-19 | 9 | Snupn         |
| 1.495050219 | 7.86E-15 | 5.89E-19 | 9 | Ccdc25        |
| 1.432173742 | 8.54E-15 | 6.39E-19 | 9 | Gdap2         |
| 1.068586711 | 9.24E-15 | 6.92E-19 | 9 | Tut1          |
| 1.253708882 | 1.22E-14 | 9.13E-19 | 9 | Tk1           |
| 0.943860389 | 1.28E-14 | 9.55E-19 | 9 | Enho          |
| 1.079278115 | 1.31E-14 | 9.78E-19 | 9 | Smurf1        |
| 1.720754034 | 1.38E-14 | 1.03E-18 | 9 | Tmem2         |
| 1.142819162 | 1.74E-14 | 1.30E-18 | 9 | Cox18         |
| 0.705190767 | 1.80E-14 | 1.35E-18 | 9 | Pim2          |
| 1.223331852 | 1.94E-14 | 1.46E-18 | 9 | Pusl1         |
| 1.076498596 | 1.96E-14 | 1.47E-18 | 9 | Haus7         |
| 1.279098007 | 2.38E-14 | 1.78E-18 | 9 | Dhcr7         |
| 0.833465702 | 2.41E-14 | 1.81E-18 | 9 | Kntc1         |
| 0.912660562 | 2.71E-14 | 2.03E-18 | 9 | Alkbh4        |
| 1.471022432 | 2.86E-14 | 2.14E-18 | 9 | Nlrp1b        |
| 0.912778414 | 3.00E-14 | 2.25E-18 | 9 | Slc25a13      |
| 1.114001002 | 3.01E-14 | 2.25E-18 | 9 | Atrip         |
| 1.123563598 | 3.05E-14 | 2.28E-18 | 9 | Mcm2          |
| 1.027112172 | 3.23E-14 | 2.42E-18 | 9 | Paxip1        |
| 1.279439258 | 3.27E-14 | 2.45E-18 | 9 | Vps45         |
| 1.749863476 | 3.39E-14 | 2.54E-18 | 9 | Ipo11         |
| 1.451855636 | 3.48E-14 | 2.61E-18 | 9 | Nf2           |
| 1.423681252 | 3.55E-14 | 2.66E-18 | 9 | Gtpbp1        |
| 1.185881657 | 3.55E-14 | 2.66E-18 | 9 | Sco2          |
| 0.939775177 | 3.98E-14 | 2.98E-18 | 9 | Bloc1s4       |
| 1.337888337 | 4.79E-14 | 3.59E-18 | 9 | Nbeal2        |
| 1.226231234 | 5.71E-14 | 4.28E-18 | 9 | Osbpl2        |
| 1.123748262 | 6.06E-14 | 4.54E-18 | 9 | 1700052N19Rik |
| 0.94022876  | 7.18E-14 | 5.38E-18 | 9 | Ric8b         |
| 0.666313905 | 8.56E-14 | 6.41E-18 | 9 | Gcc1          |
| 1.147008048 | 9.10E-14 | 6.82E-18 | 9 | Retsat        |
| 0.733155238 | 9.35E-14 | 7.00E-18 | 9 | Ifitm6        |
| 0.854009566 | 1.02E-13 | 7.65E-18 | 9 | Zfp346        |
| 0.805570368 | 1.11E-13 | 8.28E-18 | 9 | Zfp946        |
| 1.285066309 | 1.23E-13 | 9.19E-18 | 9 | Pola1         |
| 1.400907383 | 1.32E-13 | 9.87E-18 | 9 | Taf6          |
| 1.137013293 | 1.33E-13 | 9.95E-18 | 9 | Actl6a        |
| 1.508394774 | 1.47E-13 | 1.10E-17 | 9 | Spire1        |
| 1.491445677 | 1.55E-13 | 1.16E-17 | 9 | Ftsj1         |
| 1.152823539 | 1.69E-13 | 1.26E-17 | 9 | Tbc1d19       |
| 1.504548561 | 2.10E-13 | 1.57E-17 | 9 | Herc6         |

|             |          |          |   |               |
|-------------|----------|----------|---|---------------|
| 1.069885164 | 2.27E-13 | 1.70E-17 | 9 | Arap2         |
| 1.048680381 | 2.37E-13 | 1.78E-17 | 9 | Casc5         |
| 0.581301672 | 3.09E-13 | 2.32E-17 | 9 | Mms22l        |
| 0.551229069 | 3.53E-13 | 2.65E-17 | 9 | Cdc6          |
| 0.974520167 | 3.72E-13 | 2.79E-17 | 9 | Cep57         |
| 0.83618426  | 3.73E-13 | 2.79E-17 | 9 | Zadh2         |
| 0.910504795 | 4.05E-13 | 3.03E-17 | 9 | B230217O12Rik |
| 1.564754909 | 4.15E-13 | 3.11E-17 | 9 | Zeb1          |
| 2.068570466 | 4.31E-13 | 3.23E-17 | 9 | Mcm6          |
| 1.241963397 | 4.41E-13 | 3.30E-17 | 9 | Rcbtb1        |
| 0.958093758 | 4.64E-13 | 3.47E-17 | 9 | Dars2         |
| 1.158803722 | 4.83E-13 | 3.62E-17 | 9 | Rnf24         |
| 1.105831223 | 5.37E-13 | 4.02E-17 | 9 | Wdr47         |
| 1.645547202 | 5.64E-13 | 4.22E-17 | 9 | Hells         |
| 0.810592581 | 5.95E-13 | 4.46E-17 | 9 | Ppp1r3b       |
| 0.974924615 | 6.64E-13 | 4.97E-17 | 9 | Acot11        |
| 0.983451143 | 6.76E-13 | 5.07E-17 | 9 | Dppa3         |
| 1.265085968 | 6.93E-13 | 5.19E-17 | 9 | Rpgrip1       |
| 1.221797507 | 8.30E-13 | 6.22E-17 | 9 | Lonp1         |
| 1.658472711 | 8.64E-13 | 6.47E-17 | 9 | Cdc42ep4      |
| 0.702676436 | 1.07E-12 | 8.05E-17 | 9 | Klhl8         |
| 1.470453164 | 1.16E-12 | 8.68E-17 | 9 | Tbc1d4        |
| 1.449129074 | 1.27E-12 | 9.49E-17 | 9 | Kifap3        |
| 0.947924247 | 1.28E-12 | 9.59E-17 | 9 | Eif5a2        |
| 1.277783523 | 1.50E-12 | 1.12E-16 | 9 | Srgap3        |
| 0.960686524 | 1.57E-12 | 1.17E-16 | 9 | Pik3c3        |
| 1.133855929 | 1.66E-12 | 1.24E-16 | 9 | Thyn1         |
| 0.878956437 | 2.06E-12 | 1.55E-16 | 9 | Mmachc        |
| 1.461705831 | 2.08E-12 | 1.56E-16 | 9 | Dhx8          |
| 1.100064019 | 2.11E-12 | 1.58E-16 | 9 | Mrps11        |
| 1.027628551 | 2.24E-12 | 1.68E-16 | 9 | 2810025M15Rik |
| 1.061450542 | 2.27E-12 | 1.70E-16 | 9 | Haus8         |
| 1.209825389 | 2.47E-12 | 1.85E-16 | 9 | Cox19         |
| 0.987561042 | 2.49E-12 | 1.87E-16 | 9 | Tmem238       |
| 0.906382422 | 2.52E-12 | 1.88E-16 | 9 | Elk1          |
| 0.946525505 | 2.68E-12 | 2.00E-16 | 9 | Ttll12        |
| 0.925263018 | 2.83E-12 | 2.12E-16 | 9 | Ercc6l        |
| 0.824096056 | 3.03E-12 | 2.27E-16 | 9 | Tmem154       |
| 1.091978295 | 3.83E-12 | 2.87E-16 | 9 | Pla2g4a       |
| 1.602121493 | 4.03E-12 | 3.02E-16 | 9 | Trmt1         |
| 0.836297067 | 4.71E-12 | 3.53E-16 | 9 | Rasgrp3       |
| 1.111917693 | 4.77E-12 | 3.57E-16 | 9 | Ei24          |
| 1.746397663 | 5.34E-12 | 4.00E-16 | 9 | Pdpn          |
| 1.127592714 | 5.64E-12 | 4.23E-16 | 9 | Trit1         |
| 1.222134421 | 5.80E-12 | 4.34E-16 | 9 | Pknox1        |
| 0.803850737 | 5.94E-12 | 4.45E-16 | 9 | Cd3eap        |
| 1.431679964 | 6.27E-12 | 4.70E-16 | 9 | Mrps15        |
| 1.286543958 | 6.46E-12 | 4.84E-16 | 9 | Sdhaf2        |
| 1.128022914 | 6.77E-12 | 5.07E-16 | 9 | Hip1r         |
| 1.379532338 | 7.12E-12 | 5.33E-16 | 9 | Leng1         |
| 0.887456825 | 7.47E-12 | 5.60E-16 | 9 | Rbm12         |
| 1.317074983 | 7.90E-12 | 5.92E-16 | 9 | 5830418K08Rik |
| 1.193513387 | 8.71E-12 | 6.52E-16 | 9 | 1700025G04Rik |
| 0.775951557 | 8.76E-12 | 6.56E-16 | 9 | Mbnl3         |
| 0.753874099 | 8.92E-12 | 6.68E-16 | 9 | Pglyrp1       |
| 1.314536703 | 9.12E-12 | 6.83E-16 | 9 | BC029214      |
| 1.253972597 | 9.88E-12 | 7.40E-16 | 9 | Ramp3         |
| 0.907044777 | 1.10E-11 | 8.22E-16 | 9 | Mllt1         |
| 1.385119088 | 1.20E-11 | 8.98E-16 | 9 | Plac8         |
| 1.272549864 | 1.29E-11 | 9.70E-16 | 9 | Pls3          |
| 0.809400758 | 1.31E-11 | 9.79E-16 | 9 | Zdhhc14       |

|             |          |          |   |               |
|-------------|----------|----------|---|---------------|
| 0.885675387 | 1.32E-11 | 9.88E-16 | 9 | Diexf         |
| 0.840687063 | 1.42E-11 | 1.06E-15 | 9 | Prr5l         |
| 0.781810715 | 1.44E-11 | 1.08E-15 | 9 | Atf7          |
| 0.766513449 | 1.45E-11 | 1.09E-15 | 9 | 6330407A03Rik |
| 0.77326286  | 1.69E-11 | 1.27E-15 | 9 | Cdca3         |
| 0.638331269 | 1.75E-11 | 1.31E-15 | 9 | Tbcd          |
| 1.29282342  | 1.85E-11 | 1.38E-15 | 9 | Ctdp1         |
| 0.797456296 | 2.03E-11 | 1.52E-15 | 9 | Lsm11         |
| 0.983032706 | 2.13E-11 | 1.59E-15 | 9 | Ckap2l        |
| 0.887501526 | 2.50E-11 | 1.87E-15 | 9 | Tlcd2         |
| 1.046261313 | 2.57E-11 | 1.92E-15 | 9 | Nrm           |
| 1.113640436 | 2.59E-11 | 1.94E-15 | 9 | Tubgcp2       |
| 1.08639465  | 2.63E-11 | 1.97E-15 | 9 | Arl13b        |
| 1.099229718 | 2.71E-11 | 2.03E-15 | 9 | AB041803      |
| 0.812803132 | 2.78E-11 | 2.08E-15 | 9 | Rnf141        |
| 0.934553419 | 2.83E-11 | 2.12E-15 | 9 | Prmt3         |
| 0.890307013 | 3.12E-11 | 2.34E-15 | 9 | Rqcd1         |
| 0.867146107 | 3.39E-11 | 2.54E-15 | 9 | Myom1         |
| 1.823388647 | 3.43E-11 | 2.57E-15 | 9 | Trappc9       |
| 1.157609881 | 3.60E-11 | 2.69E-15 | 9 | Cherp         |
| 2.286680281 | 4.12E-11 | 3.09E-15 | 9 | Agpat4        |
| 1.368057127 | 4.19E-11 | 3.14E-15 | 9 | Ykt6          |
| 1.569155113 | 4.83E-11 | 3.62E-15 | 9 | Pou2f1        |
| 1.316691317 | 5.07E-11 | 3.80E-15 | 9 | Ide           |
| 1.55390642  | 5.17E-11 | 3.87E-15 | 9 | Top2a         |
| 1.022190094 | 5.30E-11 | 3.97E-15 | 9 | Gpr137        |
| 1.0941463   | 6.27E-11 | 4.69E-15 | 9 | Tsc2          |
| 0.91052247  | 6.57E-11 | 4.92E-15 | 9 | Ogfod3        |
| 0.92301841  | 6.86E-11 | 5.14E-15 | 9 | Tmem260       |
| 1.096347411 | 7.71E-11 | 5.77E-15 | 9 | Ubap1         |
| 1.134205727 | 8.45E-11 | 6.33E-15 | 9 | Was           |
| 1.072920891 | 9.35E-11 | 7.00E-15 | 9 | Dopey2        |
| 1.216946509 | 9.40E-11 | 7.04E-15 | 9 | Ampd3         |
| 1.080698991 | 9.41E-11 | 7.05E-15 | 9 | Ak3           |
| 0.382583171 | 1.06E-10 | 7.92E-15 | 9 | Rad51c        |
| 0.984050251 | 1.11E-10 | 8.32E-15 | 9 | Crip2         |
| 1.342654839 | 1.15E-10 | 8.65E-15 | 9 | Trim11        |
| 1.287745972 | 1.28E-10 | 9.60E-15 | 9 | Rdh13         |
| 1.254490333 | 1.37E-10 | 1.02E-14 | 9 | Gys1          |
| 1.567689414 | 1.44E-10 | 1.08E-14 | 9 | Lsm3          |
| 0.856180208 | 1.48E-10 | 1.11E-14 | 9 | Cdyl2         |
| 1.035719763 | 1.50E-10 | 1.12E-14 | 9 | Syce2         |
| 1.498183395 | 1.51E-10 | 1.13E-14 | 9 | Snrpd3        |
| 1.153225638 | 1.51E-10 | 1.13E-14 | 9 | Klf16         |
| 1.208867271 | 1.52E-10 | 1.13E-14 | 9 | Scarb1        |
| 1.104918397 | 1.52E-10 | 1.14E-14 | 9 | Dhx38         |
| 1.267767055 | 1.55E-10 | 1.16E-14 | 9 | Lyst          |
| 0.760128079 | 1.58E-10 | 1.18E-14 | 9 | 4933427D14Rik |
| 1.043612069 | 1.67E-10 | 1.25E-14 | 9 | Akip1         |
| 0.900053898 | 1.88E-10 | 1.41E-14 | 9 | Spsb1         |
| 1.13323825  | 1.91E-10 | 1.43E-14 | 9 | Cnot11        |
| 0.862525896 | 1.96E-10 | 1.47E-14 | 9 | Palld         |
| 1.208769602 | 1.98E-10 | 1.49E-14 | 9 | Rrn3          |
| 1.468169363 | 2.32E-10 | 1.73E-14 | 9 | Lima1         |
| 0.629038802 | 2.36E-10 | 1.77E-14 | 9 | Zfp319        |
| 1.346162095 | 2.54E-10 | 1.90E-14 | 9 | Mtmr10        |
| 1.27090825  | 2.58E-10 | 1.93E-14 | 9 | Hirip3        |
| 1.647503517 | 2.68E-10 | 2.01E-14 | 9 | Rfc1          |
| 0.872433834 | 2.79E-10 | 2.09E-14 | 9 | Fam132a       |
| 1.468842737 | 2.92E-10 | 2.19E-14 | 9 | Gpr35         |
| 1.346478675 | 3.23E-10 | 2.42E-14 | 9 | Nsmce1        |

|             |          |          |   |               |
|-------------|----------|----------|---|---------------|
| 1.479321234 | 3.48E-10 | 2.61E-14 | 9 | Gtf3a         |
| 1.285739601 | 4.21E-10 | 3.15E-14 | 9 | Ngfrap1       |
| 1.438742838 | 5.14E-10 | 3.85E-14 | 9 | Pde4a         |
| 1.225889712 | 5.29E-10 | 3.96E-14 | 9 | Dus1l         |
| 0.690863874 | 5.29E-10 | 3.96E-14 | 9 | Wbp1          |
| 0.996505974 | 5.80E-10 | 4.35E-14 | 9 | Brwd1         |
| 0.911406644 | 5.98E-10 | 4.48E-14 | 9 | Adamtsl5      |
| 1.25478458  | 6.05E-10 | 4.53E-14 | 9 | Thoc7         |
| 1.108232184 | 6.17E-10 | 4.62E-14 | 9 | Prim1         |
| 1.123713244 | 6.47E-10 | 4.85E-14 | 9 | Pmpcb         |
| 0.631960719 | 6.81E-10 | 5.10E-14 | 9 | Chek2         |
| 0.709316142 | 6.85E-10 | 5.13E-14 | 9 | Arhgef18      |
| 1.08058191  | 7.88E-10 | 5.90E-14 | 9 | Tceanc2       |
| 0.918670683 | 8.14E-10 | 6.10E-14 | 9 | Ndufaf6       |
| 0.789640093 | 8.19E-10 | 6.14E-14 | 9 | Mri1          |
| 0.99495841  | 8.42E-10 | 6.30E-14 | 9 | Ino80e        |
| 1.402882278 | 8.43E-10 | 6.31E-14 | 9 | Acot7         |
| 0.721594415 | 8.51E-10 | 6.37E-14 | 9 | Lyrm5         |
| 0.979741404 | 8.64E-10 | 6.47E-14 | 9 | Ubox5         |
| 1.194682636 | 9.49E-10 | 7.11E-14 | 9 | Drg1          |
| 0.973442035 | 9.81E-10 | 7.35E-14 | 9 | Tmcc2         |
| 1.739722515 | 1.05E-09 | 7.86E-14 | 9 | Gpr114        |
| 0.926607699 | 1.06E-09 | 7.92E-14 | 9 | Atf7ip        |
| 0.890536637 | 1.07E-09 | 8.04E-14 | 9 | Lnp           |
| 1.076932285 | 1.08E-09 | 8.07E-14 | 9 | Usp5          |
| 0.959437465 | 1.08E-09 | 8.07E-14 | 9 | Dusp18        |
| 0.966753552 | 1.09E-09 | 8.13E-14 | 9 | Ripk2         |
| 1.239988227 | 1.14E-09 | 8.56E-14 | 9 | 9130230L23Rik |
| 0.767073318 | 1.24E-09 | 9.28E-14 | 9 | Ncs1          |
| 0.838177878 | 1.33E-09 | 9.99E-14 | 9 | Snip1         |
| 1.208903129 | 1.35E-09 | 1.01E-13 | 9 | Sec31a        |
| 0.65105873  | 1.40E-09 | 1.05E-13 | 9 | Gpx7          |
| 0.754398914 | 1.52E-09 | 1.14E-13 | 9 | Cox15         |
| 0.72405351  | 1.54E-09 | 1.15E-13 | 9 | Clspn         |
| 1.250979658 | 1.54E-09 | 1.15E-13 | 9 | Ptplb         |
| 0.812557601 | 1.54E-09 | 1.16E-13 | 9 | Ddx50         |
| 1.32957804  | 1.56E-09 | 1.17E-13 | 9 | Tmem184c      |
| 0.918457202 | 1.67E-09 | 1.25E-13 | 9 | Depdc5        |
| 1.392179185 | 1.86E-09 | 1.40E-13 | 9 | Lzic          |
| 0.994177271 | 1.93E-09 | 1.44E-13 | 9 | Mtif2         |
| 1.480372814 | 2.10E-09 | 1.57E-13 | 9 | Nes           |
| 1.442477275 | 2.11E-09 | 1.58E-13 | 9 | Ptdss1        |
| 0.985707424 | 2.17E-09 | 1.63E-13 | 9 | Mina          |
| 1.127162108 | 2.23E-09 | 1.67E-13 | 9 | Nxt1          |
| 1.183019486 | 2.43E-09 | 1.82E-13 | 9 | Igf2bp2       |
| 0.781136123 | 2.70E-09 | 2.02E-13 | 9 | Pcca          |
| 0.944530691 | 2.89E-09 | 2.17E-13 | 9 | Mphosph9      |
| 0.935336771 | 3.00E-09 | 2.25E-13 | 9 | Adora2b       |
| 0.877049859 | 3.03E-09 | 2.27E-13 | 9 | Wdr12         |
| 0.868643839 | 3.16E-09 | 2.37E-13 | 9 | Zfp938        |
| 1.11789153  | 3.26E-09 | 2.44E-13 | 9 | Ufsp2         |
| 0.890431116 | 3.28E-09 | 2.46E-13 | 9 | Aarsd1        |
| 0.583309559 | 3.30E-09 | 2.47E-13 | 9 | Ankrd49       |
| 0.714281679 | 3.33E-09 | 2.49E-13 | 9 | Rbks          |
| 1.417709405 | 3.51E-09 | 2.63E-13 | 9 | Dpm1          |
| 0.914302678 | 3.57E-09 | 2.67E-13 | 9 | Tmem209       |
| 1.207874361 | 3.58E-09 | 2.68E-13 | 9 | 2310061I04Rik |
| 1.667382322 | 3.60E-09 | 2.69E-13 | 9 | Spc24         |
| 1.194076004 | 3.71E-09 | 2.78E-13 | 9 | Al314180      |
| 0.823702284 | 4.22E-09 | 3.16E-13 | 9 | Ptcd3         |
| 1.302597174 | 4.29E-09 | 3.21E-13 | 9 | Urm1          |



|             |          |          |   |               |
|-------------|----------|----------|---|---------------|
| 1.167245802 | 4.32E-09 | 3.24E-13 | 9 | Poldip2       |
| 0.912127094 | 4.59E-09 | 3.43E-13 | 9 | Trim35        |
| 0.851604923 | 4.62E-09 | 3.46E-13 | 9 | Rnaseh2a      |
| 1.023566422 | 4.63E-09 | 3.47E-13 | 9 | Mavs          |
| 1.374329208 | 4.72E-09 | 3.54E-13 | 9 | Cers5         |
| 0.624997793 | 5.01E-09 | 3.75E-13 | 9 | 4831440E17Rik |
| 1.122939727 | 5.03E-09 | 3.77E-13 | 9 | Gm608         |
| 1.038698054 | 5.73E-09 | 4.29E-13 | 9 | Atad3a        |
| 1.403603696 | 5.96E-09 | 4.47E-13 | 9 | Cdk18         |
| 0.817725571 | 5.99E-09 | 4.49E-13 | 9 | Actr5         |
| 0.800741556 | 6.08E-09 | 4.55E-13 | 9 | Speg          |
| 0.87208954  | 6.10E-09 | 4.57E-13 | 9 | Zfp746        |
| 1.049631928 | 6.14E-09 | 4.60E-13 | 9 | Napg          |
| 0.916917603 | 6.56E-09 | 4.91E-13 | 9 | Galnt2        |
| 1.027474261 | 6.59E-09 | 4.94E-13 | 9 | Nudt2         |
| 0.980184715 | 6.67E-09 | 4.99E-13 | 9 | Lymr4         |
| 1.023972843 | 6.96E-09 | 5.21E-13 | 9 | Cluh          |
| 0.827041426 | 7.37E-09 | 5.52E-13 | 9 | Prr24         |
| 1.097155665 | 7.49E-09 | 5.61E-13 | 9 | Hspa14        |
| 1.073650679 | 8.47E-09 | 6.34E-13 | 9 | Luzp1         |
| 0.832772004 | 9.16E-09 | 6.86E-13 | 9 | Fbxo42        |
| 0.989924961 | 9.61E-09 | 7.20E-13 | 9 | Utp14a        |
| 1.164729985 | 9.79E-09 | 7.34E-13 | 9 | Phf5a         |
| 1.070715979 | 9.90E-09 | 7.41E-13 | 9 | Klrb1b        |
| 0.752946885 | 1.06E-08 | 7.91E-13 | 9 | Tbc1d20       |
| 1.133487893 | 1.10E-08 | 8.22E-13 | 9 | Gcnt1         |
| 0.728011549 | 1.10E-08 | 8.26E-13 | 9 | Sh3rf1        |
| 0.950354901 | 1.10E-08 | 8.27E-13 | 9 | Fbxo6         |
| 0.600893741 | 1.11E-08 | 8.28E-13 | 9 | Gtpbp6        |
| 1.326043653 | 1.12E-08 | 8.41E-13 | 9 | Sympk         |
| 0.870638823 | 1.18E-08 | 8.81E-13 | 9 | Rfng          |
| 1.16362141  | 1.19E-08 | 8.95E-13 | 9 | AA414768      |
| 0.94673239  | 1.25E-08 | 9.39E-13 | 9 | Slu7          |
| 1.671636831 | 1.28E-08 | 9.57E-13 | 9 | Il1r2         |
| 0.78396664  | 1.33E-08 | 9.96E-13 | 9 | Ampd2         |
| 0.963982643 | 1.56E-08 | 1.17E-12 | 9 | Mrpl46        |
| 1.082954283 | 1.60E-08 | 1.19E-12 | 9 | Cab39l        |
| 1.059332314 | 1.63E-08 | 1.22E-12 | 9 | Npat          |
| 1.165257681 | 1.76E-08 | 1.32E-12 | 9 | Tcp1          |
| 1.146744449 | 1.79E-08 | 1.34E-12 | 9 | Agap3         |
| 0.668837295 | 2.10E-08 | 1.57E-12 | 9 | Micall1       |
| 0.866179679 | 2.19E-08 | 1.64E-12 | 9 | Rabep2        |
| 0.898211974 | 2.22E-08 | 1.66E-12 | 9 | Taf15         |
| 0.867193025 | 2.23E-08 | 1.67E-12 | 9 | Pogz          |
| 0.671857057 | 2.28E-08 | 1.71E-12 | 9 | Pggt1b        |
| 1.05933726  | 2.36E-08 | 1.77E-12 | 9 | Zbtb1         |
| 1.071731349 | 2.44E-08 | 1.83E-12 | 9 | Foxo1         |
| 0.855004056 | 2.79E-08 | 2.09E-12 | 9 | Ccndbp1       |
| 1.301090034 | 2.87E-08 | 2.15E-12 | 9 | Gpd2          |
| 1.230937768 | 3.19E-08 | 2.39E-12 | 9 | Tmx4          |
| 1.24723462  | 3.31E-08 | 2.48E-12 | 9 | Gnl3          |
| 1.003246231 | 3.70E-08 | 2.77E-12 | 9 | Nfx1          |
| 1.063993602 | 3.71E-08 | 2.78E-12 | 9 | Cpsf3l        |
| 0.897485082 | 3.80E-08 | 2.85E-12 | 9 | Prrg2         |
| 0.748071045 | 4.07E-08 | 3.05E-12 | 9 | Rrp15         |
| 0.81999096  | 4.12E-08 | 3.09E-12 | 9 | Orc6          |
| 0.662845039 | 4.46E-08 | 3.34E-12 | 9 | Nme6          |
| 0.821808807 | 4.74E-08 | 3.55E-12 | 9 | Zc3h12d       |
| 0.579221194 | 5.10E-08 | 3.82E-12 | 9 | Snora31       |
| 1.249266235 | 5.18E-08 | 3.88E-12 | 9 | Isyna1        |
| 0.860581843 | 5.26E-08 | 3.94E-12 | 9 | Plrg1         |

|             |          |          |   |             |
|-------------|----------|----------|---|-------------|
| 1.138454409 | 5.35E-08 | 4.01E-12 | 9 | Tmem223     |
| 0.802354515 | 5.37E-08 | 4.02E-12 | 9 | Aim2        |
| 1.050674393 | 5.49E-08 | 4.11E-12 | 9 | Phf10       |
| 0.897044288 | 5.70E-08 | 4.27E-12 | 9 | Senp1       |
| 0.663094408 | 5.96E-08 | 4.46E-12 | 9 | Pcsk7       |
| 1.080320041 | 6.12E-08 | 4.58E-12 | 9 | Eif1ad      |
| 1.164590612 | 6.15E-08 | 4.61E-12 | 9 | Mrpl12      |
| 1.144431124 | 6.50E-08 | 4.87E-12 | 9 | Zak         |
| 0.748871545 | 6.53E-08 | 4.89E-12 | 9 | Ppat        |
| 0.581551512 | 6.55E-08 | 4.90E-12 | 9 | Sp3os       |
| 0.934836895 | 6.78E-08 | 5.08E-12 | 9 | Hectd3      |
| 0.981035417 | 6.86E-08 | 5.13E-12 | 9 | Cdk14       |
| 1.032062512 | 6.93E-08 | 5.19E-12 | 9 | Yif1a       |
| 0.992728877 | 7.82E-08 | 5.85E-12 | 9 | Pomt1       |
| 0.517327517 | 8.78E-08 | 6.58E-12 | 9 | Gm20324     |
| 1.323150525 | 9.16E-08 | 6.86E-12 | 9 | Myd88       |
| 0.887751748 | 9.27E-08 | 6.94E-12 | 9 | Ppp2cb      |
| 1.098600162 | 9.36E-08 | 7.01E-12 | 9 | Phf20       |
| 0.684269548 | 9.73E-08 | 7.29E-12 | 9 | Rhof        |
| 0.791404206 | 1.00E-07 | 7.49E-12 | 9 | Sik3        |
| 0.901544295 | 1.11E-07 | 8.29E-12 | 9 | Zdhhc18     |
| 0.92024969  | 1.13E-07 | 8.46E-12 | 9 | Tatdn1      |
| 1.155178397 | 1.15E-07 | 8.62E-12 | 9 | Tinf2       |
| 0.466968726 | 1.16E-07 | 8.66E-12 | 9 | BC035044    |
| 1.291513609 | 1.20E-07 | 8.96E-12 | 9 | Adam8       |
| 0.927327226 | 1.24E-07 | 9.28E-12 | 9 | Clns1a      |
| 0.847332539 | 1.34E-07 | 1.00E-11 | 9 | Lyar        |
| 0.713473801 | 1.37E-07 | 1.03E-11 | 9 | Rfx3        |
| 0.981356911 | 1.45E-07 | 1.08E-11 | 9 | Rab5a       |
| 1.104462297 | 1.46E-07 | 1.09E-11 | 9 | Pon3        |
| 0.9552479   | 1.50E-07 | 1.12E-11 | 9 | Crk         |
| 1.133158794 | 1.56E-07 | 1.17E-11 | 9 | Anapc15     |
| 0.6684894   | 1.57E-07 | 1.17E-11 | 9 | Stx17       |
| 1.141975218 | 1.58E-07 | 1.19E-11 | 9 | Apex2       |
| 0.680902215 | 1.64E-07 | 1.23E-11 | 9 | Tyk2        |
| 1.254360823 | 1.64E-07 | 1.23E-11 | 9 | Clec5a      |
| 0.854162835 | 1.73E-07 | 1.29E-11 | 9 | Arl4a       |
| 1.220878278 | 1.73E-07 | 1.29E-11 | 9 | Snrpa1      |
| 0.499268009 | 1.81E-07 | 1.36E-11 | 9 | Gramd4      |
| 0.913850796 | 1.84E-07 | 1.38E-11 | 9 | Znhit2      |
| 0.802184697 | 1.89E-07 | 1.42E-11 | 9 | Xlr4b       |
| 1.041770675 | 1.93E-07 | 1.45E-11 | 9 | Uvrag       |
| 1.085307452 | 2.11E-07 | 1.58E-11 | 9 | Naa38       |
| 1.042261761 | 2.26E-07 | 1.70E-11 | 9 | Slc2a4rg-ps |
| 1.767008459 | 2.30E-07 | 1.72E-11 | 9 | Gpr4        |
| 0.766541796 | 2.31E-07 | 1.73E-11 | 9 | Mycbp       |
| 1.185114498 | 2.43E-07 | 1.82E-11 | 9 | Al462493    |
| 1.042696378 | 2.48E-07 | 1.85E-11 | 9 | Bcap31      |
| 0.634411497 | 2.50E-07 | 1.87E-11 | 9 | H2-Ke2      |
| 0.94087154  | 2.54E-07 | 1.90E-11 | 9 | Psd4        |
| 1.273775225 | 2.59E-07 | 1.94E-11 | 9 | Trmt6       |
| 1.021095823 | 2.66E-07 | 2.00E-11 | 9 | Cyp4f16     |
| 0.699225213 | 2.68E-07 | 2.01E-11 | 9 | Ticam2      |
| 0.837064122 | 2.91E-07 | 2.18E-11 | 9 | Nolc1       |
| 1.273300503 | 2.98E-07 | 2.23E-11 | 9 | Ankzf1      |
| 0.686966169 | 3.00E-07 | 2.25E-11 | 9 | Ggct        |
| 0.846466435 | 3.14E-07 | 2.35E-11 | 9 | Mut         |
| 0.902810999 | 3.23E-07 | 2.42E-11 | 9 | Tusc1       |
| 0.76700057  | 3.24E-07 | 2.42E-11 | 9 | Eftud2      |
| 1.217342873 | 3.31E-07 | 2.48E-11 | 9 | Mpc2        |
| 0.675477869 | 3.32E-07 | 2.48E-11 | 9 | Cirbp       |

|              |          |          |   |               |
|--------------|----------|----------|---|---------------|
| 0.642372119  | 3.37E-07 | 2.52E-11 | 9 | Nlrp1a        |
| 0.819020011  | 3.38E-07 | 2.53E-11 | 9 | Atg2a         |
| 1.075517504  | 3.41E-07 | 2.55E-11 | 9 | Nmt2          |
| 0.885166852  | 3.45E-07 | 2.58E-11 | 9 | Smim4         |
| 1.067371732  | 3.99E-07 | 2.99E-11 | 9 | Pi4k2a        |
| 0.732795914  | 4.07E-07 | 3.05E-11 | 9 | Acd           |
| 0.772044331  | 4.54E-07 | 3.40E-11 | 9 | 9630033F20Rik |
| 0.977030555  | 4.67E-07 | 3.50E-11 | 9 | Mfsd5         |
| 0.932216643  | 4.98E-07 | 3.73E-11 | 9 | Mctp1         |
| 0.907951586  | 5.11E-07 | 3.83E-11 | 9 | lpmk          |
| 0.91793292   | 5.15E-07 | 3.86E-11 | 9 | Acbd4         |
| 1.290697517  | 5.25E-07 | 3.93E-11 | 9 | Polr2e        |
| 2.515764105  | 5.27E-07 | 3.94E-11 | 9 | Tsen15        |
| 1.1237791    | 5.61E-07 | 4.20E-11 | 9 | Zfml          |
| 0.833910977  | 5.78E-07 | 4.33E-11 | 9 | Pde1b         |
| 0.852555221  | 5.89E-07 | 4.41E-11 | 9 | Nomo1         |
| 0.845794585  | 6.01E-07 | 4.50E-11 | 9 | Cdk1          |
| 1.133392055  | 6.04E-07 | 4.52E-11 | 9 | Mvb12b        |
| 0.915191901  | 6.34E-07 | 4.75E-11 | 9 | Akap11        |
| 0.989637517  | 6.38E-07 | 4.78E-11 | 9 | Rbbp7         |
| 0.97450724   | 6.63E-07 | 4.97E-11 | 9 | Trak2         |
| 0.940729945  | 6.72E-07 | 5.03E-11 | 9 | Fars2         |
| 0.940725252  | 6.82E-07 | 5.11E-11 | 9 | Amica1        |
| 0.927474899  | 6.95E-07 | 5.21E-11 | 9 | Ift52         |
| 0.575689762  | 7.18E-07 | 5.37E-11 | 9 | Csf1          |
| 0.825711923  | 7.23E-07 | 5.41E-11 | 9 | Homer1        |
| 1.002914926  | 7.36E-07 | 5.51E-11 | 9 | Fyttd1        |
| 0.620943702  | 7.95E-07 | 5.95E-11 | 9 | Apeh          |
| 0.775213905  | 8.16E-07 | 6.11E-11 | 9 | Piga          |
| 0.768055205  | 8.22E-07 | 6.15E-11 | 9 | Pwwp2b        |
| 1.463681025  | 8.37E-07 | 6.27E-11 | 9 | P2ry14        |
| 0.927474899  | 8.74E-07 | 6.54E-11 | 9 | Rab3gap2      |
| 0.986392849  | 9.58E-07 | 7.18E-11 | 9 | Esyt2         |
| 1.010169858  | 1.02E-06 | 7.63E-11 | 9 | Med9          |
| 1.300583898  | 1.09E-06 | 8.13E-11 | 9 | Poldip3       |
| 0.630065747  | 1.09E-06 | 8.14E-11 | 9 | Exosc7        |
| 1.937497042  | 1.13E-06 | 8.45E-11 | 9 | Zmym1         |
| 0.925141786  | 1.13E-06 | 8.50E-11 | 9 | Emc1          |
| 0.607892303  | 1.17E-06 | 8.76E-11 | 9 | Mcm7          |
| 0.691490637  | 1.19E-06 | 8.88E-11 | 9 | Pdp1          |
| 0.659442654  | 1.20E-06 | 8.99E-11 | 9 | Il1rl1        |
| 0.921237328  | 1.20E-06 | 9.02E-11 | 9 | Cisd1         |
| 1.050410011  | 1.26E-06 | 9.43E-11 | 9 | Ppp1r2        |
| 1.368281712  | 1.36E-06 | 1.02E-10 | 9 | Fbrs          |
| 1.066195486  | 1.37E-06 | 1.02E-10 | 9 | Enpp1         |
| 0.956242076  | 1.46E-06 | 1.09E-10 | 9 | Cnpy3         |
| 0.904518523  | 1.59E-06 | 1.19E-10 | 9 | Siva1         |
| 0.961271499  | 1.75E-06 | 1.31E-10 | 9 | Bcl3          |
| 0.953534456  | 1.76E-06 | 1.32E-10 | 9 | Elof1         |
| 1.058693345  | 1.76E-06 | 1.32E-10 | 9 | Gmpr          |
| 0.890562112  | 1.86E-06 | 1.39E-10 | 9 | Zhx1          |
| 0.794696993  | 1.87E-06 | 1.40E-10 | 9 | Slc25a19      |
| 0.740508266  | 1.93E-06 | 1.45E-10 | 9 | Klhdc4        |
| -1.137821681 | 1.94E-06 | 1.46E-10 | 9 | H2-K1         |
| 0.745389796  | 1.97E-06 | 1.47E-10 | 9 | Pcp4l1        |
| 0.95107231   | 2.13E-06 | 1.60E-10 | 9 | Cenpb         |
| 0.981941824  | 2.19E-06 | 1.64E-10 | 9 | Ube2d2a       |
| 0.519477956  | 2.44E-06 | 1.83E-10 | 9 | Tmem222       |
| 0.96307175   | 2.46E-06 | 1.84E-10 | 9 | Trerf1        |
| 1.217247009  | 2.46E-06 | 1.84E-10 | 9 | Usp3          |
| 0.736996359  | 2.49E-06 | 1.86E-10 | 9 | Ralgapa1      |

|              |          |          |   |               |
|--------------|----------|----------|---|---------------|
| 0.63416853   | 2.56E-06 | 1.92E-10 | 9 | Rprd1b        |
| 1.181847564  | 2.56E-06 | 1.92E-10 | 9 | Zbtb18        |
| 0.522961072  | 2.66E-06 | 1.99E-10 | 9 | Mov10         |
| 0.564110198  | 2.71E-06 | 2.03E-10 | 9 | Gm166         |
| -1.725822415 | 2.75E-06 | 2.06E-10 | 9 | Sepp1         |
| 0.362856455  | 2.92E-06 | 2.18E-10 | 9 | Igfbp6        |
| 0.715682666  | 2.95E-06 | 2.21E-10 | 9 | Btbd6         |
| 1.369849055  | 3.07E-06 | 2.30E-10 | 9 | Tubgcp4       |
| 1.39760722   | 3.19E-06 | 2.39E-10 | 9 | Klrk1         |
| 0.667265379  | 3.59E-06 | 2.69E-10 | 9 | Lztr1         |
| 0.950728685  | 3.70E-06 | 2.77E-10 | 9 | Cct3          |
| 1.062364776  | 3.81E-06 | 2.85E-10 | 9 | Itga6         |
| 0.698732633  | 3.84E-06 | 2.87E-10 | 9 | Fancm         |
| 1.043892551  | 3.97E-06 | 2.97E-10 | 9 | Aven          |
| 0.717972508  | 3.98E-06 | 2.98E-10 | 9 | Gm12942       |
| 0.768316776  | 4.22E-06 | 3.16E-10 | 9 | Bfar          |
| 0.934124568  | 4.28E-06 | 3.21E-10 | 9 | Galnt12       |
| 1.078363086  | 4.35E-06 | 3.26E-10 | 9 | Trnau1ap      |
| 1.057400997  | 4.42E-06 | 3.31E-10 | 9 | Tspan4        |
| 0.611580564  | 4.69E-06 | 3.51E-10 | 9 | Papolg        |
| 0.933123024  | 4.74E-06 | 3.55E-10 | 9 | Anapc1        |
| 0.633857762  | 4.92E-06 | 3.69E-10 | 9 | Lymr1         |
| 1.281235804  | 4.99E-06 | 3.73E-10 | 9 | Mrpl35        |
| 0.737331349  | 5.15E-06 | 3.86E-10 | 9 | Tpx2          |
| 0.701889344  | 5.20E-06 | 3.89E-10 | 9 | Prr5          |
| 1.024333828  | 5.23E-06 | 3.92E-10 | 9 | Dpp4          |
| 0.971123816  | 5.65E-06 | 4.23E-10 | 9 | Txn11         |
| 0.668313049  | 5.68E-06 | 4.26E-10 | 9 | Lsm14b        |
| 1.61959912   | 6.09E-06 | 4.56E-10 | 9 | Wdfy4         |
| 0.943623032  | 6.09E-06 | 4.56E-10 | 9 | Rae1          |
| 1.201397143  | 6.29E-06 | 4.71E-10 | 9 | Zfp592        |
| 0.771526023  | 6.33E-06 | 4.74E-10 | 9 | Apex1         |
| 0.897113987  | 6.43E-06 | 4.81E-10 | 9 | Adh5          |
| 1.032835415  | 6.51E-06 | 4.87E-10 | 9 | Scaf4         |
| 0.767403951  | 6.52E-06 | 4.88E-10 | 9 | Dhfr          |
| 0.886200231  | 6.57E-06 | 4.92E-10 | 9 | Smg1          |
| 0.987805568  | 6.60E-06 | 4.94E-10 | 9 | Pde6d         |
| 0.827586892  | 6.86E-06 | 5.14E-10 | 9 | Aifm1         |
| 1.040718099  | 7.04E-06 | 5.27E-10 | 9 | Trip6         |
| 0.871276159  | 7.07E-06 | 5.29E-10 | 9 | Nme1          |
| 1.090752455  | 7.09E-06 | 5.31E-10 | 9 | Churc1        |
| 0.623254757  | 7.28E-06 | 5.45E-10 | 9 | Prkar2b       |
| 0.85071162   | 7.47E-06 | 5.60E-10 | 9 | Cwf19l2       |
| 0.790009983  | 7.48E-06 | 5.60E-10 | 9 | 4930503L19Rik |
| 0.551640507  | 7.71E-06 | 5.78E-10 | 9 | Dnlz          |
| 0.551788666  | 8.10E-06 | 6.06E-10 | 9 | Atp8b2        |
| 0.538452923  | 8.80E-06 | 6.59E-10 | 9 | Ddah2         |
| 1.851961267  | 9.31E-06 | 6.97E-10 | 9 | Hdac5         |
| 0.441358261  | 9.59E-06 | 7.18E-10 | 9 | Cyp4f13       |
| 0.732698184  | 9.67E-06 | 7.24E-10 | 9 | Ubxn8         |
| 0.805852113  | 9.73E-06 | 7.29E-10 | 9 | Zfp513        |
| 0.560542101  | 9.79E-06 | 7.33E-10 | 9 | Cd40          |
| 0.479465764  | 9.83E-06 | 7.37E-10 | 9 | Ifitm1        |
| 0.526938181  | 9.88E-06 | 7.40E-10 | 9 | Cox11         |
| 0.737579711  | 1.03E-05 | 7.69E-10 | 9 | Shkbp1        |
| 0.481740043  | 1.04E-05 | 7.78E-10 | 9 | 2610306M01Rik |
| 0.866839832  | 1.04E-05 | 7.83E-10 | 9 | Gnptab        |
| 0.863333964  | 1.05E-05 | 7.84E-10 | 9 | Pde3b         |
| 0.654664656  | 1.05E-05 | 7.84E-10 | 9 | Mcomp1        |
| 0.601304378  | 1.06E-05 | 7.93E-10 | 9 | Ccdc88b       |
| 0.677791792  | 1.06E-05 | 7.97E-10 | 9 | Gorab         |

|              |          |          |   |               |
|--------------|----------|----------|---|---------------|
| 0.928535526  | 1.06E-05 | 7.97E-10 | 9 | Axin1         |
| 0.937604147  | 1.09E-05 | 8.13E-10 | 9 | Fam110a       |
| 0.736001179  | 1.13E-05 | 8.46E-10 | 9 | Tgs1          |
| 1.009585896  | 1.15E-05 | 8.61E-10 | 9 | Med8          |
| 1.092140315  | 1.17E-05 | 8.79E-10 | 9 | Ccl12         |
| 0.828781623  | 1.18E-05 | 8.82E-10 | 9 | Slc20a1       |
| 0.571736196  | 1.18E-05 | 8.86E-10 | 9 | Smad4         |
| 0.708772736  | 1.20E-05 | 8.96E-10 | 9 | Rfwd3         |
| 1.031148544  | 1.20E-05 | 8.99E-10 | 9 | Nans          |
| 0.638149632  | 1.24E-05 | 9.28E-10 | 9 | Krr1          |
| 0.817257921  | 1.25E-05 | 9.34E-10 | 9 | Slc31a1       |
| 0.426128019  | 1.28E-05 | 9.60E-10 | 9 | 5430416N02Rik |
| 0.872703951  | 1.32E-05 | 9.89E-10 | 9 | Med25         |
| 0.819539833  | 1.35E-05 | 1.01E-09 | 9 | Sephs1        |
| 0.827038098  | 1.36E-05 | 1.02E-09 | 9 | Rnf135        |
| 0.849767491  | 1.37E-05 | 1.02E-09 | 9 | Abhd5         |
| 0.793279021  | 1.38E-05 | 1.03E-09 | 9 | 2700094K13Rik |
| 0.553460097  | 1.39E-05 | 1.04E-09 | 9 | Pus1          |
| 0.800456856  | 1.39E-05 | 1.04E-09 | 9 | Edc4          |
| 0.565313809  | 1.40E-05 | 1.05E-09 | 9 | Hdc           |
| 0.605935641  | 1.44E-05 | 1.08E-09 | 9 | Ciapi1        |
| 0.886164026  | 1.45E-05 | 1.08E-09 | 9 | Ltv1          |
| 0.785355417  | 1.46E-05 | 1.10E-09 | 9 | Pank2         |
| 0.811941806  | 1.48E-05 | 1.11E-09 | 9 | Usp39         |
| 0.452860518  | 1.50E-05 | 1.12E-09 | 9 | Rc3h2         |
| 1.064947877  | 1.52E-05 | 1.13E-09 | 9 | Chchd4        |
| 1.068633933  | 1.59E-05 | 1.19E-09 | 9 | Angptl2       |
| 0.881755788  | 1.63E-05 | 1.22E-09 | 9 | Fam46c        |
| 0.613395005  | 1.64E-05 | 1.23E-09 | 9 | Tmem120b      |
| 0.922860104  | 1.66E-05 | 1.24E-09 | 9 | Tnfrsf11a     |
| 1.257362195  | 1.70E-05 | 1.27E-09 | 9 | Dhps          |
| -0.716861763 | 1.73E-05 | 1.29E-09 | 9 | Itm2b         |
| 0.297327987  | 1.75E-05 | 1.31E-09 | 9 | Slc25a38      |
| 0.911841157  | 1.77E-05 | 1.33E-09 | 9 | Abr           |
| 0.767026216  | 1.78E-05 | 1.34E-09 | 9 | Tubb5         |
| 0.820607584  | 1.81E-05 | 1.35E-09 | 9 | Peak1         |
| 0.744931095  | 1.83E-05 | 1.37E-09 | 9 | Tom1l2        |
| 0.862771054  | 1.85E-05 | 1.39E-09 | 9 | Csnk2a1       |
| 0.674713288  | 1.88E-05 | 1.40E-09 | 9 | Ndufv1        |
| 0.66027613   | 1.89E-05 | 1.41E-09 | 9 | Rbm10         |
| 0.729106148  | 1.90E-05 | 1.42E-09 | 9 | Impa1         |
| 0.724276923  | 1.90E-05 | 1.43E-09 | 9 | Med10         |
| 0.674194666  | 1.98E-05 | 1.48E-09 | 9 | Ptcd2         |
| 0.865665834  | 2.01E-05 | 1.50E-09 | 9 | Imp4          |
| 0.711729302  | 2.01E-05 | 1.51E-09 | 9 | Scly          |
| 0.723745075  | 2.10E-05 | 1.57E-09 | 9 | Ash2l         |
| 0.819496165  | 2.12E-05 | 1.59E-09 | 9 | Acly          |
| 0.926888547  | 2.18E-05 | 1.63E-09 | 9 | Rnf187        |
| 0.438320582  | 2.22E-05 | 1.66E-09 | 9 | Orc2          |
| 0.447193107  | 2.23E-05 | 1.67E-09 | 9 | Dlg3          |
| 0.94186926   | 2.27E-05 | 1.70E-09 | 9 | Kpnb1         |
| 0.559134249  | 2.29E-05 | 1.71E-09 | 9 | Vps37c        |
| -1.664085368 | 2.30E-05 | 1.72E-09 | 9 | Zfp36         |
| 0.659985895  | 2.34E-05 | 1.75E-09 | 9 | Smim12        |
| 0.480461172  | 2.43E-05 | 1.82E-09 | 9 | Tjp2          |
| 0.553729696  | 2.48E-05 | 1.86E-09 | 9 | Zfp317        |
| 1.14796252   | 2.59E-05 | 1.94E-09 | 9 | Trim12a       |
| 0.541673076  | 2.61E-05 | 1.95E-09 | 9 | Rab3gap1      |
| 0.902555989  | 2.61E-05 | 1.95E-09 | 9 | Trex1         |
| 0.936513006  | 2.62E-05 | 1.96E-09 | 9 | Eif4e2        |
| 0.448863146  | 2.65E-05 | 1.98E-09 | 9 | 1110004E09Rik |

|             |          |          |   |               |
|-------------|----------|----------|---|---------------|
| 0.718117878 | 2.70E-05 | 2.02E-09 | 9 | 9430008C03Rik |
| 0.843186442 | 2.80E-05 | 2.10E-09 | 9 | Mrpl28        |
| 0.805068433 | 2.82E-05 | 2.11E-09 | 9 | Rpa1          |
| 0.925755236 | 2.84E-05 | 2.13E-09 | 9 | Mcts1         |
| 0.60115147  | 2.86E-05 | 2.14E-09 | 9 | Mrps27        |
| 0.828161749 | 2.98E-05 | 2.23E-09 | 9 | Lig3          |
| 1.086786505 | 2.99E-05 | 2.24E-09 | 9 | Gopc          |
| 0.724765426 | 3.03E-05 | 2.27E-09 | 9 | Imp3          |
| 0.90256004  | 3.03E-05 | 2.27E-09 | 9 | Jmjd6         |
| 0.764452231 | 3.10E-05 | 2.33E-09 | 9 | Dyrk3         |
| 0.371314252 | 3.11E-05 | 2.33E-09 | 9 | Vps9d1        |
| 0.7132904   | 3.22E-05 | 2.41E-09 | 9 | Phf13         |
| 0.493655902 | 3.35E-05 | 2.51E-09 | 9 | Zfp664        |
| 1.256494605 | 3.36E-05 | 2.51E-09 | 9 | 2010012O05Rik |
| 0.891278243 | 3.51E-05 | 2.63E-09 | 9 | Zfr           |
| 0.821744084 | 3.63E-05 | 2.72E-09 | 9 | Ndufv2        |
| 1.016565526 | 3.66E-05 | 2.74E-09 | 9 | Ppil4         |
| 0.526978621 | 3.69E-05 | 2.76E-09 | 9 | Phtf2         |
| 0.475563869 | 3.73E-05 | 2.79E-09 | 9 | Eno2          |
| 0.736211506 | 3.87E-05 | 2.90E-09 | 9 | Rhbdd1        |
| 0.864905246 | 3.90E-05 | 2.92E-09 | 9 | Tctex1d2      |
| 0.627376709 | 4.15E-05 | 3.11E-09 | 9 | Prosc         |
| 0.688141173 | 4.17E-05 | 3.12E-09 | 9 | Zfp709        |
| 1.473531843 | 4.22E-05 | 3.16E-09 | 9 | 1500011B03Rik |
| 0.853179634 | 4.24E-05 | 3.18E-09 | 9 | Pts           |
| 0.786747768 | 4.39E-05 | 3.29E-09 | 9 | Wwc2          |
| 0.472041076 | 4.41E-05 | 3.30E-09 | 9 | Serpinb9      |
| 0.833150932 | 4.42E-05 | 3.31E-09 | 9 | Baz2a         |
| 0.573546881 | 4.63E-05 | 3.47E-09 | 9 | Tbc1d14       |
| 0.735444644 | 4.71E-05 | 3.53E-09 | 9 | Pdha1         |
| 1.268347264 | 4.71E-05 | 3.53E-09 | 9 | Eif2ak3       |
| 0.701489584 | 4.71E-05 | 3.53E-09 | 9 | E330033B04Rik |
| 0.63012652  | 4.75E-05 | 3.56E-09 | 9 | Arfgap3       |
| 0.565611428 | 4.80E-05 | 3.60E-09 | 9 | Yipf1         |
| 0.741210493 | 4.89E-05 | 3.66E-09 | 9 | Htati2        |
| 1.000553297 | 4.93E-05 | 3.69E-09 | 9 | Napsa         |
| 0.52600696  | 4.93E-05 | 3.69E-09 | 9 | Lancl2        |
| 0.905723861 | 4.96E-05 | 3.72E-09 | 9 | Pik3ca        |
| 0.713175296 | 4.97E-05 | 3.72E-09 | 9 | Slc7a1        |
| 0.826380104 | 5.21E-05 | 3.90E-09 | 9 | Whsc1         |
| 0.826953586 | 5.25E-05 | 3.93E-09 | 9 | Acsl5         |
| 1.137357752 | 5.27E-05 | 3.95E-09 | 9 | Pramef8       |
| 0.567097182 | 5.32E-05 | 3.98E-09 | 9 | Timm50        |
| 0.985107445 | 5.37E-05 | 4.02E-09 | 9 | Cdc37         |
| 0.704394042 | 5.45E-05 | 4.08E-09 | 9 | Nme4          |
| 0.65225355  | 5.51E-05 | 4.13E-09 | 9 | Pogk          |
| 0.512623315 | 5.52E-05 | 4.14E-09 | 9 | Mrps12        |
| 0.874007335 | 5.60E-05 | 4.19E-09 | 9 | Fkbp15        |
| 0.686056302 | 5.80E-05 | 4.34E-09 | 9 | Dgcr14        |
| 0.50020041  | 5.82E-05 | 4.36E-09 | 9 | Rcl1          |
| 0.512536269 | 5.85E-05 | 4.38E-09 | 9 | Morc2a        |
| 0.666539916 | 6.04E-05 | 4.52E-09 | 9 | Lrch1         |
| 0.368033768 | 6.23E-05 | 4.67E-09 | 9 | Dcun1d3       |
| 0.691423026 | 6.26E-05 | 4.69E-09 | 9 | Chd1l         |
| 1.023497705 | 6.30E-05 | 4.72E-09 | 9 | Gtf2f1        |
| 0.709781725 | 6.46E-05 | 4.83E-09 | 9 | Zzef1         |
| 0.836940698 | 6.65E-05 | 4.98E-09 | 9 | Camk2g        |
| 0.956289705 | 6.67E-05 | 5.00E-09 | 9 | Srp19         |
| 0.790654386 | 6.67E-05 | 5.00E-09 | 9 | BC028528      |
| 0.785471229 | 6.73E-05 | 5.04E-09 | 9 | Nrp2          |
| 0.657486526 | 6.97E-05 | 5.22E-09 | 9 | R3hcc1l       |

|             |             |          |   |               |
|-------------|-------------|----------|---|---------------|
| 0.982987447 | 7.36E-05    | 5.51E-09 | 9 | Dcaf12        |
| 0.494935333 | 7.51E-05    | 5.63E-09 | 9 | Polr1a        |
| 0.691064536 | 7.67E-05    | 5.74E-09 | 9 | Arpp19        |
| 0.5547317   | 7.76E-05    | 5.81E-09 | 9 | Ube4b         |
| 0.620323407 | 7.77E-05    | 5.82E-09 | 9 | Stim1         |
| 0.682772064 | 7.93E-05    | 5.94E-09 | 9 | Ssrp1         |
| 1.018419381 | 7.98E-05    | 5.98E-09 | 9 | Akr1b8        |
| 1.242927374 | 8.00E-05    | 5.99E-09 | 9 | Prdx4         |
| 1.018881198 | 8.08E-05    | 6.05E-09 | 9 | Ugp2          |
| 1.311918795 | 8.08E-05    | 6.05E-09 | 9 | Mthfd2        |
| 0.562896044 | 8.34E-05    | 6.24E-09 | 9 | Srm           |
| 0.5234504   | 8.89E-05    | 6.66E-09 | 9 | Isy1          |
| 1.097975073 | 8.90E-05    | 6.67E-09 | 9 | Efemp2        |
| 0.770196145 | 9.08E-05    | 6.80E-09 | 9 | Uspl1         |
| 0.590086212 | 9.11E-05    | 6.82E-09 | 9 | Ttc12         |
| 0.909610285 | 9.16E-05    | 6.86E-09 | 9 | Mbtd1         |
| 0.965966937 | 9.35E-05    | 7.00E-09 | 9 | Ctps2         |
| 0.937818788 | 9.55E-05    | 7.15E-09 | 9 | Rpp21         |
| 0.653615509 | 9.82E-05    | 7.35E-09 | 9 | Golga3        |
| 0.507137546 | 0.000100598 | 7.53E-09 | 9 | Dkc1          |
| 0.53954341  | 0.000100821 | 7.55E-09 | 9 | Fhl3          |
| 1.08203948  | 0.000100828 | 7.55E-09 | 9 | Polr2f        |
| 0.728042877 | 0.000105186 | 7.88E-09 | 9 | Ift22         |
| 0.751899765 | 0.000107605 | 8.06E-09 | 9 | Gfer          |
| 1.013318849 | 0.000107886 | 8.08E-09 | 9 | 0610011F06Rik |
| 1.042447923 | 0.000109013 | 8.16E-09 | 9 | Mrps25        |
| 0.879902166 | 0.00010915  | 8.17E-09 | 9 | Map3k14       |
| 0.754044974 | 0.000114389 | 8.57E-09 | 9 | Dph3          |
| 0.898158528 | 0.000116023 | 8.69E-09 | 9 | Aph1c         |
| 0.660697359 | 0.000117396 | 8.79E-09 | 9 | Lrp8          |
| 0.655630221 | 0.000117595 | 8.81E-09 | 9 | Ids           |
| 0.813873093 | 0.000118004 | 8.84E-09 | 9 | Tpm1          |
| 1.083646233 | 0.0001188   | 8.90E-09 | 9 | Tec           |
| 0.866207414 | 0.000118864 | 8.90E-09 | 9 | G6pdx         |
| 1.011589039 | 0.000119322 | 8.94E-09 | 9 | Cops7a        |
| 0.78529578  | 0.000122948 | 9.21E-09 | 9 | Clec4e        |
| 0.678663252 | 0.000129599 | 9.71E-09 | 9 | Chst11        |
| 0.576667643 | 0.000130134 | 9.75E-09 | 9 | Med31         |
| 1.118298365 | 0.000132062 | 9.89E-09 | 9 | Ilkap         |
| 0.993695134 | 0.000132971 | 9.96E-09 | 9 | Lonrf3        |
| 0.552784279 | 0.000133405 | 9.99E-09 | 9 | Crcp          |
| 0.81425789  | 0.000135438 | 1.01E-08 | 9 | Sdf4          |
| 1.001389042 | 0.000142576 | 1.07E-08 | 9 | Aldh3b1       |
| 0.821423078 | 0.000150716 | 1.13E-08 | 9 | Pin1          |
| 0.742458092 | 0.000151449 | 1.13E-08 | 9 | Aprt          |
| 0.530882274 | 0.000151836 | 1.14E-08 | 9 | Itgb1bp1      |
| 1.006290083 | 0.000165689 | 1.24E-08 | 9 | Olfm1         |
| 0.682816929 | 0.000167477 | 1.25E-08 | 9 | Rpl27a        |
| 0.411615925 | 0.000168694 | 1.26E-08 | 9 | Gm2027        |
| 0.644743594 | 0.0001696   | 1.27E-08 | 9 | Rab12         |
| 0.566628042 | 0.000171371 | 1.28E-08 | 9 | Cdyl          |
| 0.80510672  | 0.000174846 | 1.31E-08 | 9 | Exosc4        |
| 0.567780455 | 0.000176594 | 1.32E-08 | 9 | Icmt          |
| 0.605174415 | 0.000179129 | 1.34E-08 | 9 | Ppm1m         |
| 0.576009098 | 0.000182138 | 1.36E-08 | 9 | Polr2c        |
| 0.653752173 | 0.000183699 | 1.38E-08 | 9 | D10Wsu102e    |
| 0.547516286 | 0.000187141 | 1.40E-08 | 9 | Uchl4         |
| 0.622379316 | 0.000187518 | 1.40E-08 | 9 | Trak1         |
| 0.561109472 | 0.000187614 | 1.41E-08 | 9 | Nuak2         |
| 1.008577182 | 0.000188702 | 1.41E-08 | 9 | Agpat6        |
| 0.719950766 | 0.000190535 | 1.43E-08 | 9 | Rab22a        |

|              |             |          |   |               |
|--------------|-------------|----------|---|---------------|
| 0.922452132  | 0.00019968  | 1.50E-08 | 9 | Arl6ip5       |
| 0.704802511  | 0.000202722 | 1.52E-08 | 9 | Gapvd1        |
| 0.81235571   | 0.000206521 | 1.55E-08 | 9 | Spcs3         |
| 0.642537061  | 0.000209697 | 1.57E-08 | 9 | Ccdc82        |
| 0.467106476  | 0.000212582 | 1.59E-08 | 9 | Fam58b        |
| 0.654696078  | 0.000217662 | 1.63E-08 | 9 | Tiprl         |
| 0.826340217  | 0.000219496 | 1.64E-08 | 9 | 8430427H17Rik |
| 0.852995882  | 0.000222417 | 1.67E-08 | 9 | Plscr1        |
| 0.65004188   | 0.000230814 | 1.73E-08 | 9 | Tmem68        |
| 0.413709635  | 0.000236295 | 1.77E-08 | 9 | Phf11c        |
| 0.773552132  | 0.000248186 | 1.86E-08 | 9 | Eprs          |
| 0.893349432  | 0.000256089 | 1.92E-08 | 9 | Fgfr1op       |
| 0.909971499  | 0.000260838 | 1.95E-08 | 9 | Nop58         |
| 0.712444692  | 0.000269087 | 2.02E-08 | 9 | Supt16        |
| 0.583245847  | 0.000269746 | 2.02E-08 | 9 | 2810417H13Rik |
| 0.730272971  | 0.000276007 | 2.07E-08 | 9 | Nod2          |
| 0.704857044  | 0.000279593 | 2.09E-08 | 9 | Pi4kb         |
| 0.816269419  | 0.000283878 | 2.13E-08 | 9 | Sdhd          |
| 0.579054145  | 0.000290943 | 2.18E-08 | 9 | Ccr7          |
| 0.454078603  | 0.000296348 | 2.22E-08 | 9 | Hspa4l        |
| 0.800413684  | 0.000305298 | 2.29E-08 | 9 | Ccdc109b      |
| 0.623196363  | 0.000307533 | 2.30E-08 | 9 | Dhx9          |
| 0.819135938  | 0.000309014 | 2.31E-08 | 9 | Ppm1h         |
| 0.708155216  | 0.000310992 | 2.33E-08 | 9 | Sf3b6         |
| 0.770108222  | 0.000319294 | 2.39E-08 | 9 | Zcwpw1        |
| 0.921333386  | 0.000320008 | 2.40E-08 | 9 | Anapc4        |
| 0.582956137  | 0.000323962 | 2.43E-08 | 9 | Slc35b4       |
| 0.942743215  | 0.00032915  | 2.47E-08 | 9 | Hiat1         |
| 0.873327688  | 0.000331099 | 2.48E-08 | 9 | Atxn1l        |
| 0.564420234  | 0.000342188 | 2.56E-08 | 9 | Poc1b         |
| 0.45748366   | 0.000348284 | 2.61E-08 | 9 | Tfpi          |
| 0.884994104  | 0.000355212 | 2.66E-08 | 9 | Dnajc4        |
| 0.64855311   | 0.000355451 | 2.66E-08 | 9 | Fubp1         |
| 0.732783945  | 0.000356419 | 2.67E-08 | 9 | 2300009A05Rik |
| 0.800479203  | 0.000358213 | 2.68E-08 | 9 | Pthr2         |
| 0.865792249  | 0.000361415 | 2.71E-08 | 9 | Sipa1         |
| 0.571646655  | 0.000365813 | 2.74E-08 | 9 | Nup54         |
| 0.739479418  | 0.000372219 | 2.79E-08 | 9 | Pqlc1         |
| 0.394061992  | 0.000373921 | 2.80E-08 | 9 | Rps24         |
| 0.701089984  | 0.000374593 | 2.81E-08 | 9 | B630005N14Rik |
| 1.042619255  | 0.000375203 | 2.81E-08 | 9 | E2f1          |
| 1.047053852  | 0.000376978 | 2.82E-08 | 9 | Sgsm2         |
| 0.747814177  | 0.000380907 | 2.85E-08 | 9 | Gabpb1        |
| 0.619432649  | 0.00039314  | 2.94E-08 | 9 | Yipf5         |
| 0.677107845  | 0.000422729 | 3.17E-08 | 9 | Plk3          |
| 1.101167827  | 0.000425327 | 3.19E-08 | 9 | Lrwd1         |
| 0.771407388  | 0.000427127 | 3.20E-08 | 9 | Taf5l         |
| 0.771554117  | 0.000431894 | 3.23E-08 | 9 | Ncbp1         |
| 0.640253873  | 0.000435152 | 3.26E-08 | 9 | Fam204a       |
| 0.951208821  | 0.000439204 | 3.29E-08 | 9 | Sos1          |
| 0.334973883  | 0.000443352 | 3.32E-08 | 9 | Pde7a         |
| -0.559910095 | 0.000452818 | 3.39E-08 | 9 | Malat1        |
| 0.835788242  | 0.000452834 | 3.39E-08 | 9 | Pdlim1        |
| 0.418408156  | 0.000453522 | 3.40E-08 | 9 | Ppp1r13l      |
| 0.431782416  | 0.000460826 | 3.45E-08 | 9 | Dhodh         |
| 0.877152098  | 0.000466939 | 3.50E-08 | 9 | Psmd1         |
| 0.611140842  | 0.00048915  | 3.66E-08 | 9 | Msmo1         |
| 1.147111421  | 0.000506445 | 3.79E-08 | 9 | Selm          |
| 0.638551595  | 0.000519371 | 3.89E-08 | 9 | Atp2b4        |
| 0.610675208  | 0.000535637 | 4.01E-08 | 9 | Pkm           |
| 0.880789846  | 0.000568858 | 4.26E-08 | 9 | Mkl1          |



|             |             |          |   |               |
|-------------|-------------|----------|---|---------------|
| 0.489490332 | 0.000571784 | 4.28E-08 | 9 | Dhdds         |
| 0.50517905  | 0.000578748 | 4.33E-08 | 9 | Zfp275        |
| 0.565189392 | 0.000582555 | 4.36E-08 | 9 | Atg13         |
| 0.752677067 | 0.00058456  | 4.38E-08 | 9 | Cd200r1       |
| 0.831811762 | 0.000585931 | 4.39E-08 | 9 | Snhg1         |
| 0.319245941 | 0.000587914 | 4.40E-08 | 9 | Polk          |
| 0.384019282 | 0.000597665 | 4.48E-08 | 9 | Nusap1        |
| 0.753514839 | 0.000610995 | 4.58E-08 | 9 | Dapp1         |
| 0.628343517 | 0.000649734 | 4.87E-08 | 9 | Parvb         |
| 0.495470236 | 0.000650323 | 4.87E-08 | 9 | Lmnb2         |
| 0.664670057 | 0.000650553 | 4.87E-08 | 9 | Zfp637        |
| 0.421998073 | 0.00067     | 5.02E-08 | 9 | Commdd5       |
| 0.562922199 | 0.000671958 | 5.03E-08 | 9 | Serbp1        |
| 1.187136209 | 0.000686003 | 5.14E-08 | 9 | Hs6st1        |
| 0.666950032 | 0.000702572 | 5.26E-08 | 9 | Kit           |
| 0.535591615 | 0.000708679 | 5.31E-08 | 9 | Orai1         |
| 0.667624047 | 0.000718321 | 5.38E-08 | 9 | Brix1         |
| 0.783455363 | 0.000743062 | 5.57E-08 | 9 | Mrpl38        |
| 0.787851433 | 0.000785373 | 5.88E-08 | 9 | Hcst          |
| 0.69100735  | 0.000795803 | 5.96E-08 | 9 | Slc25a24      |
| 0.794712015 | 0.000811838 | 6.08E-08 | 9 | Trappc6a      |
| 0.646161784 | 0.000824112 | 6.17E-08 | 9 | Cnot3         |
| 0.61716096  | 0.000828577 | 6.21E-08 | 9 | Atp5d         |
| 0.498932443 | 0.000846169 | 6.34E-08 | 9 | Sel1l3        |
| 0.727787502 | 0.000850184 | 6.37E-08 | 9 | Plxna1        |
| 0.666635113 | 0.00085576  | 6.41E-08 | 9 | Vps26b        |
| 0.450845955 | 0.000859516 | 6.44E-08 | 9 | Kctd3         |
| 0.610544851 | 0.000880539 | 6.59E-08 | 9 | Clk3          |
| 0.775614086 | 0.000880875 | 6.60E-08 | 9 | Kdm1b         |
| 0.750002231 | 0.000893066 | 6.69E-08 | 9 | Nfyc          |
| 0.872806176 | 0.000893154 | 6.69E-08 | 9 | Rilpl1        |
| 0.649417436 | 0.000898877 | 6.73E-08 | 9 | Smim11        |
| 0.562521359 | 0.000906465 | 6.79E-08 | 9 | Irf3          |
| 0.818943589 | 0.000915103 | 6.85E-08 | 9 | Ergic1        |
| 0.535339734 | 0.00094939  | 7.11E-08 | 9 | Arrdc1        |
| 0.702206151 | 0.00095427  | 7.15E-08 | 9 | Tcp1l1l1      |
| 0.668090224 | 0.000957391 | 7.17E-08 | 9 | Nop2          |
| 0.902616266 | 0.000967464 | 7.25E-08 | 9 | Gpr171        |
| 0.707054046 | 0.00096945  | 7.26E-08 | 9 | Tprgl         |
| 0.476902852 | 0.000985686 | 7.38E-08 | 9 | Mta1          |
| 0.650768739 | 0.001000101 | 7.49E-08 | 9 | Kbtbd4        |
| 0.341117515 | 0.001016505 | 7.61E-08 | 9 | Heatr5a       |
| 0.530809602 | 0.001048079 | 7.85E-08 | 9 | Brcc3         |
| 0.802275509 | 0.00106665  | 7.99E-08 | 9 | Ppm1g         |
| 0.809963566 | 0.00106894  | 8.01E-08 | 9 | Slc16a6       |
| 0.685289485 | 0.001069068 | 8.01E-08 | 9 | 5830432E09Rik |
| 0.813593334 | 0.001076168 | 8.06E-08 | 9 | Ubqln4        |
| 0.835705971 | 0.001081471 | 8.10E-08 | 9 | Nop14         |
| 0.629109614 | 0.001083235 | 8.11E-08 | 9 | Mtf1          |
| 0.679794597 | 0.001102535 | 8.26E-08 | 9 | Capn2         |
| 0.678536117 | 0.001110913 | 8.32E-08 | 9 | A430005L14Rik |
| 0.61272023  | 0.001111005 | 8.32E-08 | 9 | Itgb2         |
| 0.587907562 | 0.001137702 | 8.52E-08 | 9 | Zfyve21       |
| 0.722603866 | 0.001141848 | 8.55E-08 | 9 | Cope          |
| 0.953326604 | 0.001154227 | 8.64E-08 | 9 | Casp4         |
| 0.416850003 | 0.001174506 | 8.80E-08 | 9 | Zfp68         |
| 1.011821173 | 0.001176656 | 8.81E-08 | 9 | Tgm2          |
| 0.764668365 | 0.001180318 | 8.84E-08 | 9 | Gpr137b-ps    |
| 0.413818141 | 0.00118069  | 8.84E-08 | 9 | Rtcb          |
| 0.513694905 | 0.001183537 | 8.86E-08 | 9 | Senp7         |
| 0.549582392 | 0.00118364  | 8.86E-08 | 9 | Rab28         |

|              |             |          |   |           |
|--------------|-------------|----------|---|-----------|
| 0.36924234   | 0.001202419 | 9.01E-08 | 9 | Luc7l     |
| 0.324879788  | 0.001268933 | 9.50E-08 | 9 | Nae1      |
| 0.425283334  | 0.001270625 | 9.52E-08 | 9 | Usp19     |
| 0.527487661  | 0.001271622 | 9.52E-08 | 9 | Acta2     |
| 0.861916776  | 0.001282609 | 9.61E-08 | 9 | Apbb2     |
| 0.648110341  | 0.001287353 | 9.64E-08 | 9 | Utp6      |
| 0.704107197  | 0.001351692 | 1.01E-07 | 9 | Spp1      |
| 0.547421958  | 0.001370796 | 1.03E-07 | 9 | Slc2a6    |
| 1.026186674  | 0.001386417 | 1.04E-07 | 9 | H2-Ob     |
| 0.58154605   | 0.001398582 | 1.05E-07 | 9 | Zfp715    |
| 0.606592131  | 0.001423979 | 1.07E-07 | 9 | Aqr       |
| 0.432064889  | 0.001429679 | 1.07E-07 | 9 | Rgs18     |
| 0.788751744  | 0.001430203 | 1.07E-07 | 9 | Prrc2b    |
| 0.401584029  | 0.001471493 | 1.10E-07 | 9 | Csrp2bp   |
| 0.623907973  | 0.001489129 | 1.12E-07 | 9 | Klhl7     |
| 0.60319803   | 0.001491284 | 1.12E-07 | 9 | Mtus1     |
| 0.513242405  | 0.00151298  | 1.13E-07 | 9 | Ebna1bp2  |
| 0.571432774  | 0.001516399 | 1.14E-07 | 9 | Suz12     |
| 0.766427865  | 0.001526096 | 1.14E-07 | 9 | Jkamp     |
| 0.71405083   | 0.00155445  | 1.16E-07 | 9 | Asxl2     |
| 0.368090482  | 0.001558513 | 1.17E-07 | 9 | Arl6ip4   |
| 0.406955892  | 0.001574982 | 1.18E-07 | 9 | Cep76     |
| 0.975619685  | 0.001589193 | 1.19E-07 | 9 | Otud5     |
| 0.7412021    | 0.001598176 | 1.20E-07 | 9 | Ndufs6    |
| 0.866414824  | 0.001703958 | 1.28E-07 | 9 | Nup155    |
| 0.701044773  | 0.001751586 | 1.31E-07 | 9 | Cdc42se2  |
| 0.711344311  | 0.001799361 | 1.35E-07 | 9 | Lrch3     |
| 0.373262149  | 0.001803763 | 1.35E-07 | 9 | Plxna4os1 |
| 0.637270595  | 0.001810491 | 1.36E-07 | 9 | Socs7     |
| 0.427343408  | 0.001836895 | 1.38E-07 | 9 | Rps3      |
| 0.579152377  | 0.001916147 | 1.44E-07 | 9 | Slc2a1    |
| 0.677535119  | 0.001922323 | 1.44E-07 | 9 | Mrpl42    |
| 0.639587449  | 0.001925304 | 1.44E-07 | 9 | C1qbp     |
| 0.42511913   | 0.001934192 | 1.45E-07 | 9 | Plxna4    |
| 0.722746686  | 0.001938668 | 1.45E-07 | 9 | Cytip     |
| 0.623776426  | 0.002013506 | 1.51E-07 | 9 | Mettl23   |
| 0.380416591  | 0.002016944 | 1.51E-07 | 9 | Phlpp2    |
| 0.592611536  | 0.002019988 | 1.51E-07 | 9 | Tpr       |
| 0.868100343  | 0.002045316 | 1.53E-07 | 9 | Map4k4    |
| 0.524503801  | 0.00211756  | 1.59E-07 | 9 | Tmem129   |
| 0.431979441  | 0.002121567 | 1.59E-07 | 9 | Nrp       |
| 0.915507551  | 0.002179226 | 1.63E-07 | 9 | Tmed3     |
| 0.571349611  | 0.002192902 | 1.64E-07 | 9 | Sfxn1     |
| 0.917511888  | 0.002278569 | 1.71E-07 | 9 | Zdhhc7    |
| 1.881022695  | 0.002324585 | 1.74E-07 | 9 | Keap1     |
| 1.776404081  | 0.002337909 | 1.75E-07 | 9 | Ralgps2   |
| 0.347488953  | 0.002338701 | 1.75E-07 | 9 | Alad      |
| 0.550391765  | 0.002354437 | 1.76E-07 | 9 | Ddx6      |
| 0.497323804  | 0.002362494 | 1.77E-07 | 9 | Sertad2   |
| 0.775822331  | 0.00238856  | 1.79E-07 | 9 | Plxnb2    |
| 0.576692042  | 0.002462335 | 1.84E-07 | 9 | Brd8      |
| 0.776944152  | 0.002508699 | 1.88E-07 | 9 | N6amt1    |
| 0.555476262  | 0.00252429  | 1.89E-07 | 9 | Ccs       |
| -1.015282008 | 0.002543922 | 1.91E-07 | 9 | Junb      |
| 0.535277513  | 0.002604712 | 1.95E-07 | 9 | Cdk5      |
| 0.663956235  | 0.002606183 | 1.95E-07 | 9 | Paf1      |
| 0.978623041  | 0.002640849 | 1.98E-07 | 9 | Atp7a     |
| 1.215079129  | 0.002713518 | 2.03E-07 | 9 | Dusp16    |
| 0.474973238  | 0.002725917 | 2.04E-07 | 9 | Senp5     |
| 0.368466609  | 0.002776586 | 2.08E-07 | 9 | Chid1     |
| 0.744062778  | 0.002778025 | 2.08E-07 | 9 | Fundc2    |

|             |             |          |   |               |
|-------------|-------------|----------|---|---------------|
| 0.71679069  | 0.002841603 | 2.13E-07 | 9 | 1110008F13Rik |
| 0.971393593 | 0.002863592 | 2.14E-07 | 9 | Gmps          |
| 0.578336711 | 0.002898679 | 2.17E-07 | 9 | Gpr107        |
| 0.559864903 | 0.002998605 | 2.25E-07 | 9 | Commdd3       |
| 0.498481766 | 0.003000214 | 2.25E-07 | 9 | Havcr2        |
| 0.883452381 | 0.003057053 | 2.29E-07 | 9 | Milr1         |
| 0.77985916  | 0.003097905 | 2.32E-07 | 9 | Lmf2          |
| 0.543063034 | 0.003115777 | 2.33E-07 | 9 | Fam134b       |
| 0.812206371 | 0.003214544 | 2.41E-07 | 9 | Rnf7          |
| 0.60068379  | 0.003232754 | 2.42E-07 | 9 | Hspa13        |
| 0.565033893 | 0.003242821 | 2.43E-07 | 9 | Pml           |
| 0.339350614 | 0.003273326 | 2.45E-07 | 9 | Thap3         |
| 0.553749726 | 0.003321582 | 2.49E-07 | 9 | Inpp5b        |
| 0.860865512 | 0.003328727 | 2.49E-07 | 9 | Sec61a1       |
| 0.528372089 | 0.003338029 | 2.50E-07 | 9 | Tmem50b       |
| 0.429664313 | 0.00334925  | 2.51E-07 | 9 | Chd1          |
| 0.803242313 | 0.003424211 | 2.56E-07 | 9 | Ube2l3        |
| 0.856548283 | 0.003426705 | 2.57E-07 | 9 | Hat1          |
| 0.421597605 | 0.003518679 | 2.64E-07 | 9 | Ly6d          |
| 0.671391771 | 0.00357762  | 2.68E-07 | 9 | Acadvl        |
| 0.701517988 | 0.003598318 | 2.69E-07 | 9 | Slc39a6       |
| 0.555585549 | 0.00364298  | 2.73E-07 | 9 | Aldh4a1       |
| 0.420484113 | 0.003666717 | 2.75E-07 | 9 | Ncaph2        |
| 0.725949245 | 0.003704789 | 2.77E-07 | 9 | Mtmr1         |
| 0.567740667 | 0.003766942 | 2.82E-07 | 9 | Rars          |
| 0.886174983 | 0.003773745 | 2.83E-07 | 9 | Fn1           |
| 0.4127812   | 0.003779677 | 2.83E-07 | 9 | Rcor3         |
| 0.521320926 | 0.003847628 | 2.88E-07 | 9 | Mcur1         |
| 0.620924875 | 0.003890909 | 2.91E-07 | 9 | Pdf           |
| 0.63176597  | 0.00397467  | 2.98E-07 | 9 | Fosl1         |
| 0.424848131 | 0.00403006  | 3.02E-07 | 9 | Srpr          |
| 0.772927467 | 0.004067336 | 3.05E-07 | 9 | Ybx3          |
| 0.314590572 | 0.004080191 | 3.06E-07 | 9 | Pdcd1lg2      |
| 0.631486546 | 0.004080694 | 3.06E-07 | 9 | Atp5g3        |
| 0.276715062 | 0.004094841 | 3.07E-07 | 9 | Mdm1          |
| 0.486253581 | 0.004099873 | 3.07E-07 | 9 | Fat3          |
| 0.637972807 | 0.004173566 | 3.13E-07 | 9 | Blvra         |
| 0.360536163 | 0.004258572 | 3.19E-07 | 9 | Manea         |
| 0.84984529  | 0.004294743 | 3.22E-07 | 9 | 0610010K14Rik |
| 0.660653135 | 0.004431177 | 3.32E-07 | 9 | Nop9          |
| 0.545568554 | 0.004494133 | 3.37E-07 | 9 | Rpl14         |
| 0.715494996 | 0.004555141 | 3.41E-07 | 9 | Ift27         |
| 0.749520644 | 0.004572332 | 3.42E-07 | 9 | Setd1a        |
| 0.420535072 | 0.004627658 | 3.47E-07 | 9 | Rtn1          |
| 0.596292822 | 0.004628761 | 3.47E-07 | 9 | Cers2         |
| 0.752191182 | 0.004737533 | 3.55E-07 | 9 | Upf3a         |
| 0.582673703 | 0.004738429 | 3.55E-07 | 9 | Leprot        |
| 0.422129531 | 0.004751253 | 3.56E-07 | 9 | Ctr9          |
| 0.384486462 | 0.005014982 | 3.76E-07 | 9 | Brip1         |
| 0.635705018 | 0.00502294  | 3.76E-07 | 9 | Ptk2b         |
| 0.603131578 | 0.005070841 | 3.80E-07 | 9 | S100a11       |
| 1.104643854 | 0.005292648 | 3.96E-07 | 9 | Eif1b         |
| 0.612462445 | 0.005360519 | 4.01E-07 | 9 | Epg5          |
| 0.402455556 | 0.005415229 | 4.06E-07 | 9 | Clasp2        |
| 0.860518126 | 0.005418108 | 4.06E-07 | 9 | Uso1          |
| 0.566932638 | 0.005418783 | 4.06E-07 | 9 | Orc4          |
| 0.431587237 | 0.005491164 | 4.11E-07 | 9 | Lanc1         |
| 0.635624406 | 0.005523872 | 4.14E-07 | 9 | Sec11c        |
| 0.687451533 | 0.005581075 | 4.18E-07 | 9 | Csf2rb2       |
| 0.572431277 | 0.005706473 | 4.27E-07 | 9 | Scamp5        |
| 0.765943031 | 0.005757785 | 4.31E-07 | 9 | Hk2           |

|              |             |          |   |               |
|--------------|-------------|----------|---|---------------|
| 0.752260971  | 0.00577921  | 4.33E-07 | 9 | Ltbp3         |
| 0.688466324  | 0.005842111 | 4.38E-07 | 9 | Inf2          |
| 0.477665611  | 0.006043952 | 4.53E-07 | 9 | Hk1           |
| -0.863390875 | 0.006309255 | 4.73E-07 | 9 | Cybb          |
| 0.662770444  | 0.006387565 | 4.78E-07 | 9 | Arhgap6       |
| 0.610362643  | 0.006465489 | 4.84E-07 | 9 | BC003331      |
| 0.346118151  | 0.006579329 | 4.93E-07 | 9 | Nsun6         |
| 0.527427562  | 0.006628773 | 4.96E-07 | 9 | Ppp6r3        |
| 0.668868142  | 0.006631247 | 4.97E-07 | 9 | Sh3pxd2b      |
| 0.670415397  | 0.006814578 | 5.10E-07 | 9 | Mar.02        |
| 0.498088756  | 0.006843467 | 5.13E-07 | 9 | Ywhab         |
| 0.929165722  | 0.006871219 | 5.15E-07 | 9 | Relb          |
| 0.452395142  | 0.006947276 | 5.20E-07 | 9 | Ino80         |
| 1.049780971  | 0.007027009 | 5.26E-07 | 9 | Dda1          |
| 0.732940155  | 0.007087403 | 5.31E-07 | 9 | Itpripl1      |
| 0.587387777  | 0.00729552  | 5.46E-07 | 9 | Stx3          |
| 0.459213512  | 0.007318067 | 5.48E-07 | 9 | Mkrrn2        |
| 0.611366316  | 0.007480892 | 5.60E-07 | 9 | Adss          |
| 0.602141368  | 0.007564383 | 5.67E-07 | 9 | Cops6         |
| 1.541089994  | 0.007575298 | 5.67E-07 | 9 | Net1          |
| 0.572793924  | 0.007909425 | 5.92E-07 | 9 | 1810011H11Rik |
| 0.483059243  | 0.008026814 | 6.01E-07 | 9 | Sema6b        |
| 0.517758459  | 0.008148826 | 6.10E-07 | 9 | Tmem126a      |
| 0.589676541  | 0.008168178 | 6.12E-07 | 9 | Dnm2          |
| 0.320633873  | 0.008235446 | 6.17E-07 | 9 | Rpa3          |
| 0.52713515   | 0.008309521 | 6.22E-07 | 9 | Becn1         |
| 0.659999981  | 0.008416585 | 6.30E-07 | 9 | Pomp          |
| 0.484725696  | 0.008421596 | 6.31E-07 | 9 | Rpp25l        |
| 0.658778423  | 0.008525669 | 6.39E-07 | 9 | Adam9         |
| 0.763734222  | 0.008675363 | 6.50E-07 | 9 | Cd80          |
| 0.449319837  | 0.008682754 | 6.50E-07 | 9 | Fanci         |
| 0.578161952  | 0.008716299 | 6.53E-07 | 9 | Mdh2          |
| 0.519378733  | 0.008859092 | 6.64E-07 | 9 | Ptgs1         |
| 0.276665086  | 0.008944449 | 6.70E-07 | 9 | Peli2         |
| 0.68027367   | 0.009126441 | 6.84E-07 | 9 | Snx20         |
| -1.745927765 | 0.009133338 | 6.84E-07 | 9 | Ifi27l2a      |
| 0.977397445  | 0.009414264 | 7.05E-07 | 9 | Exosc5        |
| 0.381417449  | 0.009599537 | 7.19E-07 | 9 | AA987161      |
| 0.615916389  | 0.00964093  | 7.22E-07 | 9 | Lars          |
| 0.424085591  | 0.009828367 | 7.36E-07 | 9 | Kat7          |
| 0.639219518  | 0.009837081 | 7.37E-07 | 9 | Lamtor3       |
| 0.298103281  | 0.009923311 | 7.43E-07 | 9 | Vps11         |
| 0.468285785  | 0.010025376 | 7.51E-07 | 9 | Gyg           |
| 0.72150133   | 0.010301554 | 7.72E-07 | 9 | Rsu1          |
| 0.648475808  | 0.010425404 | 7.81E-07 | 9 | Jmjd1c        |
| -2.363702634 | 0.010476441 | 7.85E-07 | 9 | Acp5          |
| 0.550992046  | 0.010746694 | 8.05E-07 | 9 | Ubqln1        |
| 0.649428033  | 0.010876328 | 8.15E-07 | 9 | Birc2         |
| 0.557158348  | 0.011152641 | 8.35E-07 | 9 | Ndufa6        |
| 0.589805245  | 0.011526182 | 8.63E-07 | 9 | Asap1         |
| 0.892955414  | 0.011534135 | 8.64E-07 | 9 | Dyrk1a        |
| 0.29403589   | 0.011604984 | 8.69E-07 | 9 | D10Jhu81e     |
| 0.481561806  | 0.011755039 | 8.80E-07 | 9 | Lrrc8c        |
| 0.562620406  | 0.011856874 | 8.88E-07 | 9 | Vash1         |
| 0.806840883  | 0.012504248 | 9.37E-07 | 9 | Pold3         |
| 0.379660304  | 0.01256167  | 9.41E-07 | 9 | Morc3         |
| 0.625406657  | 0.012625072 | 9.46E-07 | 9 | Lrrfip1       |
| 0.483635778  | 0.012681685 | 9.50E-07 | 9 | Cbx5          |
| 0.820775739  | 0.012742071 | 9.54E-07 | 9 | Ash1l         |
| 0.605209542  | 0.012926621 | 9.68E-07 | 9 | Prdx6         |
| 0.523851528  | 0.01295205  | 9.70E-07 | 9 | Pink1         |

|              |             |          |   |               |
|--------------|-------------|----------|---|---------------|
| 0.463285726  | 0.013003574 | 9.74E-07 | 9 | Gga3          |
| 0.658951374  | 0.013188506 | 9.88E-07 | 9 | Gm15421       |
| 0.436498923  | 0.013307026 | 9.97E-07 | 9 | Abcb6         |
| 0.794931534  | 0.013584457 | 1.02E-06 | 9 | Paics         |
| 0.283541143  | 0.013898993 | 1.04E-06 | 9 | Bcl2          |
| 0.508874843  | 0.014295418 | 1.07E-06 | 9 | Psmd2         |
| 0.616650896  | 0.01445969  | 1.08E-06 | 9 | Pitrm1        |
| 0.552725803  | 0.014477396 | 1.08E-06 | 9 | Pdgfb         |
| -0.900142858 | 0.014534065 | 1.09E-06 | 9 | Cltc          |
| 0.541226811  | 0.014647562 | 1.10E-06 | 9 | Tbc1d23       |
| 0.500015698  | 0.014771509 | 1.11E-06 | 9 | Tmcc1         |
| 0.434450463  | 0.015121459 | 1.13E-06 | 9 | Atp5e         |
| 0.450821312  | 0.015586191 | 1.17E-06 | 9 | Gss           |
| 0.646978906  | 0.015952265 | 1.19E-06 | 9 | Bola3         |
| 0.694140303  | 0.016113708 | 1.21E-06 | 9 | Ppp1r11       |
| 0.545708207  | 0.016507611 | 1.24E-06 | 9 | P4hb          |
| 0.736980664  | 0.016557245 | 1.24E-06 | 9 | Slc39a7       |
| 0.681144125  | 0.016583874 | 1.24E-06 | 9 | Tbcb          |
| 0.559093066  | 0.016642242 | 1.25E-06 | 9 | Hdgf          |
| 0.615676097  | 0.016689226 | 1.25E-06 | 9 | Slc35f6       |
| 0.372553661  | 0.016712752 | 1.25E-06 | 9 | Rps14         |
| 0.556619699  | 0.016837669 | 1.26E-06 | 9 | Hspa9         |
| 1.197882323  | 0.016868585 | 1.26E-06 | 9 | Rcc2          |
| 0.516620142  | 0.016945739 | 1.27E-06 | 9 | Uqcr10        |
| 0.565243592  | 0.016963678 | 1.27E-06 | 9 | Ascc3         |
| -1.660813511 | 0.017062595 | 1.28E-06 | 9 | Zeb2          |
| 0.551161178  | 0.017203809 | 1.29E-06 | 9 | Smdt1         |
| 0.549087778  | 0.017596193 | 1.32E-06 | 9 | Hipk1         |
| 0.699360898  | 0.017658097 | 1.32E-06 | 9 | Slc25a11      |
| 0.492424897  | 0.017708115 | 1.33E-06 | 9 | Galnt6        |
| 0.273376113  | 0.017725074 | 1.33E-06 | 9 | Arhgef6       |
| 0.828780629  | 0.018080181 | 1.35E-06 | 9 | Lrrc59        |
| 0.597446284  | 0.018423954 | 1.38E-06 | 9 | Erp29         |
| 0.464928316  | 0.018941219 | 1.42E-06 | 9 | Smc6          |
| 0.679286189  | 0.019511545 | 1.46E-06 | 9 | Pik3cg        |
| 0.683046665  | 0.019513555 | 1.46E-06 | 9 | Gm12338       |
| 0.573464513  | 0.020501065 | 1.54E-06 | 9 | Ift20         |
| 0.588296259  | 0.020755017 | 1.55E-06 | 9 | Irf5          |
| 0.569428272  | 0.020922159 | 1.57E-06 | 9 | Mrpl57        |
| 0.396036809  | 0.021415011 | 1.60E-06 | 9 | Gtf2e2        |
| -1.710111286 | 0.021523274 | 1.61E-06 | 9 | Cebpb         |
| 0.46400522   | 0.021562616 | 1.61E-06 | 9 | 1700123020Rik |
| 1.038162225  | 0.022907407 | 1.72E-06 | 9 | Nek9          |
| 0.275593594  | 0.023199252 | 1.74E-06 | 9 | Hlcs          |
| 0.411333903  | 0.023271552 | 1.74E-06 | 9 | Dcun1d5       |
| 0.867865326  | 0.023348221 | 1.75E-06 | 9 | Aptx          |
| 0.734238311  | 0.023403373 | 1.75E-06 | 9 | Mesdc2        |
| 0.491575349  | 0.023476841 | 1.76E-06 | 9 | Pgap2         |
| -1.989419009 | 0.024286099 | 1.82E-06 | 9 | Sec11a        |
| 0.36906767   | 0.02488923  | 1.86E-06 | 9 | Nasp          |
| 0.506703642  | 0.025012998 | 1.87E-06 | 9 | Ldha          |
| 0.609050763  | 0.025077228 | 1.88E-06 | 9 | Cct4          |
| 0.537005229  | 0.02594854  | 1.94E-06 | 9 | Nhlrc3        |
| 0.448405537  | 0.025994556 | 1.95E-06 | 9 | Tcerg1        |
| 0.5442604    | 0.026194835 | 1.96E-06 | 9 | Tmem18        |
| 0.612266027  | 0.027024036 | 2.02E-06 | 9 | Alcam         |
| 1.305410993  | 0.027126948 | 2.03E-06 | 9 | Aim1          |
| 0.41134194   | 0.027496123 | 2.06E-06 | 9 | Mcm3          |
| 0.550249852  | 0.027789702 | 2.08E-06 | 9 | Smc1a         |
| 0.590250549  | 0.028203842 | 2.11E-06 | 9 | Zfp263        |
| 0.841856459  | 0.028304005 | 2.12E-06 | 9 | Fam220a       |

|              |             |          |   |               |
|--------------|-------------|----------|---|---------------|
| 0.615741202  | 0.028615256 | 2.14E-06 | 9 | Ubxn2a        |
| 0.389199056  | 0.028755117 | 2.15E-06 | 9 | Ufm1          |
| 0.523703909  | 0.029082991 | 2.18E-06 | 9 | Ctnna1        |
| 0.33918963   | 0.029893655 | 2.24E-06 | 9 | Appl1         |
| 0.715267996  | 0.030781839 | 2.31E-06 | 9 | Ehmt2         |
| 1.229896179  | 0.030866645 | 2.31E-06 | 9 | Papd7         |
| 0.543991619  | 0.030895737 | 2.31E-06 | 9 | Batf          |
| 0.418790931  | 0.031320062 | 2.35E-06 | 9 | Tmem173       |
| 0.562922199  | 0.031789477 | 2.38E-06 | 9 | Sepn1         |
| 0.392648867  | 0.032114258 | 2.41E-06 | 9 | 1110057K04Rik |
| 0.571795727  | 0.032278827 | 2.42E-06 | 9 | Tmem147       |
| 0.952671018  | 0.032416017 | 2.43E-06 | 9 | Wdr46         |
| 0.541479616  | 0.032686898 | 2.45E-06 | 9 | Gabarapl1     |
| 0.312436682  | 0.032755566 | 2.45E-06 | 9 | Msto1         |
| 0.736014954  | 0.032784574 | 2.46E-06 | 9 | Igf2r         |
| 0.516549923  | 0.032797104 | 2.46E-06 | 9 | Anapc5        |
| 0.576543905  | 0.032946534 | 2.47E-06 | 9 | Arhgap1       |
| 0.575270637  | 0.03314649  | 2.48E-06 | 9 | Lime1         |
| 0.587472401  | 0.033221787 | 2.49E-06 | 9 | Cyb5r4        |
| 0.624014914  | 0.03325519  | 2.49E-06 | 9 | Psmc2         |
| 0.754233488  | 0.033476935 | 2.51E-06 | 9 | Eif3i         |
| 0.923905348  | 0.033565815 | 2.51E-06 | 9 | Alkbh3        |
| 0.530140973  | 0.033642443 | 2.52E-06 | 9 | Lats2         |
| 0.873685321  | 0.033822243 | 2.53E-06 | 9 | Cdk12         |
| 0.652894241  | 0.033883809 | 2.54E-06 | 9 | Agfg2         |
| 0.284917286  | 0.034016832 | 2.55E-06 | 9 | Parp2         |
| 0.519567787  | 0.034079893 | 2.55E-06 | 9 | Tmem29        |
| 0.442360835  | 0.03441884  | 2.58E-06 | 9 | Dnttip2       |
| 0.542500308  | 0.034452473 | 2.58E-06 | 9 | Ankrd17       |
| 0.74442853   | 0.034742714 | 2.60E-06 | 9 | Pdlim7        |
| 0.289560579  | 0.035070185 | 2.63E-06 | 9 | Ccnd2         |
| 0.63690062   | 0.035724588 | 2.68E-06 | 9 | Spred1        |
| 0.697521162  | 0.035788612 | 2.68E-06 | 9 | B430306N03Rik |
| 0.729571495  | 0.036326664 | 2.72E-06 | 9 | Fam198b       |
| 0.370272933  | 0.036436575 | 2.73E-06 | 9 | Gtf2h2        |
| 0.666711024  | 0.036588841 | 2.74E-06 | 9 | Clptm1l       |
| 0.430659284  | 0.036914323 | 2.76E-06 | 9 | Cbx7          |
| 0.493412497  | 0.037029206 | 2.77E-06 | 9 | Tada1         |
| 0.374842248  | 0.038305993 | 2.87E-06 | 9 | Ncdn          |
| 0.602947866  | 0.03850927  | 2.88E-06 | 9 | Ubt1          |
| 0.478816492  | 0.038720653 | 2.90E-06 | 9 | Slc38a1       |
| 0.410090935  | 0.039386292 | 2.95E-06 | 9 | Ephx1         |
| 0.591585237  | 0.0395619   | 2.96E-06 | 9 | Slc25a4       |
| 0.615289702  | 0.039694765 | 2.97E-06 | 9 | Txndc12       |
| 0.43619169   | 0.039924443 | 2.99E-06 | 9 | Rbbp4         |
| 0.638497822  | 0.041344023 | 3.10E-06 | 9 | Gtf2h5        |
| 0.576135608  | 0.041730114 | 3.13E-06 | 9 | Nifk          |
| 0.444202379  | 0.041864909 | 3.14E-06 | 9 | Pold2         |
| 0.564188696  | 0.041917271 | 3.14E-06 | 9 | 2810474O19Rik |
| -1.888621694 | 0.042769434 | 3.20E-06 | 9 | Yipf3         |
| 0.541185422  | 0.043573197 | 3.26E-06 | 9 | Bag1          |
| 1.155263716  | 0.043678042 | 3.27E-06 | 9 | Spint1        |
| 0.338489098  | 0.043689653 | 3.27E-06 | 9 | Cenpj         |
| -1.313177227 | 0.044060428 | 3.30E-06 | 9 | Tgif1         |
| 0.493327215  | 0.044141898 | 3.31E-06 | 9 | Scamp2        |
| 0.256578327  | 0.044264087 | 3.32E-06 | 9 | Ercc8         |
| 0.28534462   | 0.04428578  | 3.32E-06 | 9 | Lnx2          |
| 0.583859973  | 0.044726965 | 3.35E-06 | 9 | Spata5        |
| 0.397055157  | 0.044964701 | 3.37E-06 | 9 | Rpf2          |
| 0.492519177  | 0.045123946 | 3.38E-06 | 9 | Lsp1          |
| 0.549824919  | 0.04528369  | 3.39E-06 | 9 | 2010107E04Rik |

|              |             |          |   |           |
|--------------|-------------|----------|---|-----------|
| 1.137272709  | 0.045630079 | 3.42E-06 | 9 | Cct5      |
| 1.526569412  | 0.046706595 | 3.50E-06 | 9 | Siah2     |
| 0.500141095  | 0.046772679 | 3.50E-06 | 9 | Msantd4   |
| 0.473879603  | 0.047179242 | 3.53E-06 | 9 | Lypla1    |
| 0.537396257  | 0.047265901 | 3.54E-06 | 9 | Pycard    |
| 0.358787249  | 0.047441814 | 3.55E-06 | 9 | Ctsf      |
| 0.715630241  | 0.047701961 | 3.57E-06 | 9 | Sp140     |
| 0.538073902  | 0.050207469 | 3.76E-06 | 9 | Il18rap   |
| -2.006702716 | 0.050253597 | 3.76E-06 | 9 | Emb       |
| 0.504407536  | 0.050444769 | 3.78E-06 | 9 | Hnrnpa2b1 |
| -1.112312869 | 0.050457541 | 3.78E-06 | 9 | Gm1821    |
| 0.522152102  | 0.050602923 | 3.79E-06 | 9 | Alg5      |
| 0.455268758  | 0.050915246 | 3.81E-06 | 9 | Glyr1     |
| 0.508963847  | 0.051304123 | 3.84E-06 | 9 | Exosc8    |
| 0.430672949  | 0.052156789 | 3.91E-06 | 9 | Cast      |
| 0.803902384  | 0.052436028 | 3.93E-06 | 9 | Metap2    |
| 0.398972407  | 0.054384259 | 4.07E-06 | 9 | Rinl      |
| 0.530628251  | 0.054872445 | 4.11E-06 | 9 | Coro7     |
| 0.544493202  | 0.055353154 | 4.15E-06 | 9 | Ppil2     |
| 0.615317402  | 0.055425492 | 4.15E-06 | 9 | Timm13    |
| 0.726779605  | 0.055595316 | 4.16E-06 | 9 | Cisd2     |
| 0.257796602  | 0.055932247 | 4.19E-06 | 9 | Fam210b   |
| 0.496609921  | 0.056794766 | 4.25E-06 | 9 | Sbf2      |
| 0.551402633  | 0.058135608 | 4.35E-06 | 9 | Oxct1     |
| 0.64947625   | 0.058672077 | 4.39E-06 | 9 | Pilra     |
| 0.359338061  | 0.05896005  | 4.42E-06 | 9 | Rpph1     |
| 0.47587012   | 0.059475332 | 4.45E-06 | 9 | Msh6      |
| -0.436182684 | 0.061036349 | 4.57E-06 | 9 | B2m       |
| 0.348471732  | 0.061265946 | 4.59E-06 | 9 | Abhd8     |
| 0.479890682  | 0.061298514 | 4.59E-06 | 9 | Apc       |
| 0.392846698  | 0.061886556 | 4.64E-06 | 9 | Dbndd2    |
| 1.016786588  | 0.062201218 | 4.66E-06 | 9 | Mob2      |
| 0.541410583  | 0.062969291 | 4.72E-06 | 9 | Git2      |
| 0.60074086   | 0.063183463 | 4.73E-06 | 9 | Tmx1      |
| 0.549016216  | 0.064549858 | 4.83E-06 | 9 | Txndc17   |
| 0.522287131  | 0.064736474 | 4.85E-06 | 9 | Ankrd13a  |
| 0.60332082   | 0.064915687 | 4.86E-06 | 9 | Fech      |
| 0.627552918  | 0.0661052   | 4.95E-06 | 9 | Spdl1     |
| 0.676637646  | 0.06696416  | 5.02E-06 | 9 | Plec      |
| 0.54010239   | 0.06798827  | 5.09E-06 | 9 | Pign      |
| 0.493139859  | 0.068134541 | 5.10E-06 | 9 | Tmem109   |
| 0.505116459  | 0.068738126 | 5.15E-06 | 9 | Eif4ebp3  |
| 0.494337091  | 0.069307229 | 5.19E-06 | 9 | Tmem43    |
| 0.501140394  | 0.069820269 | 5.23E-06 | 9 | Etf1      |
| 0.257070575  | 0.070288094 | 5.26E-06 | 9 | Smad1     |
| 0.658945273  | 0.071177726 | 5.33E-06 | 9 | Cd86      |
| 0.480424837  | 0.071744612 | 5.37E-06 | 9 | Oxa1l     |
| 0.437115762  | 0.072015581 | 5.39E-06 | 9 | Nt5e      |
| 0.490885939  | 0.072495926 | 5.43E-06 | 9 | Arhgap25  |
| 1.112620778  | 0.072540052 | 5.43E-06 | 9 | Snx30     |
| 2.008567491  | 0.074471011 | 5.58E-06 | 9 | Wdr48     |
| 0.470402368  | 0.074957991 | 5.61E-06 | 9 | Gdpd1     |
| 0.71553212   | 0.075231029 | 5.63E-06 | 9 | Echdc1    |
| 0.552790266  | 0.075299091 | 5.64E-06 | 9 | Acox3     |
| 0.588568025  | 0.076355871 | 5.72E-06 | 9 | Rftn1     |
| 0.278624225  | 0.076565452 | 5.73E-06 | 9 | Tmem219   |
| 1.222275541  | 0.07758283  | 5.81E-06 | 9 | Sdad1     |
| 0.626664033  | 0.078430415 | 5.87E-06 | 9 | Tmem128   |
| 0.705665867  | 0.081442709 | 6.10E-06 | 9 | Brpf1     |
| 0.322896208  | 0.082401491 | 6.17E-06 | 9 | Klc1      |
| -0.34270848  | 0.082835558 | 6.20E-06 | 9 | Fth1      |

|              |             |          |   |          |
|--------------|-------------|----------|---|----------|
| 0.731273797  | 0.082998921 | 6.22E-06 | 9 | Napa     |
| 0.602420239  | 0.083513037 | 6.25E-06 | 9 | Nr1h3    |
| 0.388203142  | 0.083552924 | 6.26E-06 | 9 | Lage3    |
| 0.829905812  | 0.083683878 | 6.27E-06 | 9 | Insig2   |
| 0.710333885  | 0.083717824 | 6.27E-06 | 9 | Ndufc2   |
| 0.62339772   | 0.083774536 | 6.27E-06 | 9 | Ssu72    |
| 0.559848436  | 0.086454249 | 6.48E-06 | 9 | Tmx3     |
| -0.986993502 | 0.090686071 | 6.79E-06 | 9 | Mir6236  |
| 0.716921049  | 0.091642415 | 6.86E-06 | 9 | Uqcrc2   |
| 0.451599805  | 0.091903839 | 6.88E-06 | 9 | Snx12    |
| 0.4965932    | 0.093042671 | 6.97E-06 | 9 | Nsfl1c   |
| 0.331986521  | 0.093970116 | 7.04E-06 | 9 | Hectd1   |
| 0.30276771   | 0.0943713   | 7.07E-06 | 9 | Tomm5    |
| 1.299760811  | 0.094902021 | 7.11E-06 | 9 | Hyou1    |
| 0.441810166  | 0.095826275 | 7.18E-06 | 9 | Sdf2     |
| 0.506411571  | 0.095846419 | 7.18E-06 | 9 | Agpat5   |
| 0.393540255  | 0.096241901 | 7.21E-06 | 9 | Cyb561d2 |
| 0.413059688  | 0.096608688 | 7.24E-06 | 9 | Hnrnpu   |
| 0.450845955  | 0.097175968 | 7.28E-06 | 9 | Nqo2     |
| 0.653956147  | 0.097349315 | 7.29E-06 | 9 | Samsn1   |
| 0.443374165  | 0.097638355 | 7.31E-06 | 9 | Rptor    |
| -1.175649424 | 0.097787579 | 7.32E-06 | 9 | Ctsc     |
| 0.400964088  | 0.098727296 | 7.39E-06 | 9 | Gdi2     |
| 0.257090754  | 0.098844843 | 7.40E-06 | 9 | Prmt7    |
| 0.57872887   | 0.099052822 | 7.42E-06 | 9 | Gcsh     |
| 0.903854043  | 0.099539108 | 7.45E-06 | 9 | Pcif1    |
| 0.555511731  | 0.099577443 | 7.46E-06 | 9 | Csf2rb   |
| 0.503685349  | 0.102539673 | 7.68E-06 | 9 | Kdm5c    |
| 0.345537859  | 0.102923541 | 7.71E-06 | 9 | Ccdc9    |
| 0.2961779    | 0.105460511 | 7.90E-06 | 9 | Tamm41   |
| 0.376021559  | 0.105551289 | 7.91E-06 | 9 | Wipi1    |
| 0.826362546  | 0.10562759  | 7.91E-06 | 9 | Camta1   |
| 0.687997758  | 0.105983476 | 7.94E-06 | 9 | Aup1     |
| 0.878718537  | 0.106474358 | 7.97E-06 | 9 | Prpf4b   |
| -2.266647187 | 0.106579456 | 7.98E-06 | 9 | Ccr2     |
| 0.538599794  | 0.107196045 | 8.03E-06 | 9 | Cox17    |
| 0.440474758  | 0.108313888 | 8.11E-06 | 9 | Bclaf1   |
| 0.422666384  | 0.109253249 | 8.18E-06 | 9 | Fam213a  |
| -2.313406408 | 0.109364644 | 8.19E-06 | 9 | AW112010 |
| 0.365937628  | 0.109876848 | 8.23E-06 | 9 | Zc3h15   |
| 0.429657017  | 0.110661958 | 8.29E-06 | 9 | Prpf8    |
| 0.455891249  | 0.111958178 | 8.39E-06 | 9 | Txnl4a   |
| 0.317789058  | 0.112054975 | 8.39E-06 | 9 | Tyms-ps  |
| 0.56340187   | 0.112151515 | 8.40E-06 | 9 | Slamf7   |
| 0.381413173  | 0.112425602 | 8.42E-06 | 9 | Ttyh2    |
| 0.387515685  | 0.112644559 | 8.44E-06 | 9 | Dpy19l4  |
| 0.453682524  | 0.113895236 | 8.53E-06 | 9 | Hepacam2 |
| 0.49312679   | 0.115297138 | 8.64E-06 | 9 | Cdk11b   |
| 0.578687742  | 0.116935927 | 8.76E-06 | 9 | Usp34    |
| -1.931297127 | 0.117987208 | 8.84E-06 | 9 | Prpsap1  |
| 0.583177111  | 0.118213035 | 8.85E-06 | 9 | S100a4   |
| 0.433424249  | 0.118232169 | 8.86E-06 | 9 | Casp3    |
| 0.543341704  | 0.11897014  | 8.91E-06 | 9 | Slc25a33 |
| 0.54280995   | 0.119758632 | 8.97E-06 | 9 | Pip5k1c  |
| 0.416649275  | 0.120656303 | 9.04E-06 | 9 | Rapsn    |
| 0.859754347  | 0.121496337 | 9.10E-06 | 9 | Nfkbib   |
| 0.534152195  | 0.122116266 | 9.15E-06 | 9 | Srrt     |
| 0.479508278  | 0.123327438 | 9.24E-06 | 9 | Mgst3    |
| 0.534788935  | 0.1243008   | 9.31E-06 | 9 | Dctn1    |
| 0.484690519  | 0.126802455 | 9.50E-06 | 9 | Dnajc18  |
| 0.555032497  | 0.128144642 | 9.60E-06 | 9 | Mcu      |



|              |             |          |   |               |
|--------------|-------------|----------|---|---------------|
| 0.583582813  | 0.12822865  | 9.60E-06 | 9 | Hexim1        |
| 0.59632935   | 0.129049635 | 9.67E-06 | 9 | Inpp5d        |
| 0.433790011  | 0.129303217 | 9.68E-06 | 9 | Exosc1        |
| 0.766509169  | 0.130170526 | 9.75E-06 | 9 | Mrps24        |
| 0.265256426  | 0.131567635 | 9.85E-06 | 9 | Slc8b1        |
| 0.800049109  | 0.132031098 | 9.89E-06 | 9 | Stard3nl      |
| 0.423616132  | 0.132776359 | 9.94E-06 | 9 | Smim3         |
| 0.629884814  | 0.132845129 | 9.95E-06 | 9 | Mrpl21        |
| 0.294571724  | 0.132861035 | 9.95E-06 | 9 | Prnp          |
| 0.399962016  | 0.133378853 | 9.99E-06 | 9 | Smad2         |
| 0.647974437  | 0.133497823 | 1.00E-05 | 9 | Taf4b         |
| 0.891746157  | 0.135161092 | 1.01E-05 | 9 | Gpr132        |
| 0.863756341  | 0.136345311 | 1.02E-05 | 9 | Timm22        |
| 0.913379535  | 0.137074764 | 1.03E-05 | 9 | Ccdc22        |
| 0.469966433  | 0.13859931  | 1.04E-05 | 9 | Lactb         |
| 0.622133909  | 0.140008085 | 1.05E-05 | 9 | Mfsd6         |
| 0.498482553  | 0.142954612 | 1.07E-05 | 9 | Golga4        |
| 0.511582074  | 0.143709009 | 1.08E-05 | 9 | Klf3          |
| 1.438549197  | 0.14444392  | 1.08E-05 | 9 | Usp31         |
| 0.473210259  | 0.144542402 | 1.08E-05 | 9 | Pde8a         |
| 0.391409265  | 0.145471448 | 1.09E-05 | 9 | Sf3b3         |
| -1.970519638 | 0.145523112 | 1.09E-05 | 9 | Rassf1        |
| 0.648753236  | 0.145985107 | 1.09E-05 | 9 | Cd276         |
| 0.494123434  | 0.146841198 | 1.10E-05 | 9 | Mapkap1       |
| 0.269710292  | 0.147451748 | 1.10E-05 | 9 | Ttc13         |
| 0.34295859   | 0.148461377 | 1.11E-05 | 9 | Tmem167       |
| 0.539641454  | 0.150143908 | 1.12E-05 | 9 | Necap1        |
| 0.315852949  | 0.151665075 | 1.14E-05 | 9 | Nup214        |
| 0.693042228  | 0.153263221 | 1.15E-05 | 9 | Fbxo34        |
| 0.611896125  | 0.154369934 | 1.16E-05 | 9 | Creb3         |
| 0.427600329  | 0.156251498 | 1.17E-05 | 9 | Sh3bp5        |
| 0.253089355  | 0.157161943 | 1.18E-05 | 9 | Tmcc3         |
| 0.531006346  | 0.157298333 | 1.18E-05 | 9 | Fnbp1         |
| 0.611978574  | 0.164287118 | 1.23E-05 | 9 | Tlr8          |
| 0.614830144  | 0.166278163 | 1.25E-05 | 9 | Polr3e        |
| 0.60229904   | 0.166563769 | 1.25E-05 | 9 | Gch1          |
| 0.395629277  | 0.166794106 | 1.25E-05 | 9 | Dynlt3        |
| 0.648201469  | 0.170241162 | 1.28E-05 | 9 | Mrpl43        |
| 0.404267217  | 0.170625581 | 1.28E-05 | 9 | Pfdn4         |
| 0.565774448  | 0.170781271 | 1.28E-05 | 9 | Wdr74         |
| 0.450866677  | 0.171046796 | 1.28E-05 | 9 | Tmem160       |
| 0.757791211  | 0.171591388 | 1.29E-05 | 9 | Ddx21         |
| 0.506823122  | 0.174379849 | 1.31E-05 | 9 | Hspa4         |
| 0.582596549  | 0.177435759 | 1.33E-05 | 9 | Msrb2         |
| 0.442635846  | 0.178037037 | 1.33E-05 | 9 | Ethe1         |
| 0.260056592  | 0.178096277 | 1.33E-05 | 9 | Fbxw4         |
| 0.516339804  | 0.178634709 | 1.34E-05 | 9 | Mrps34        |
| 0.530094395  | 0.179032463 | 1.34E-05 | 9 | Plcg2         |
| 0.596015481  | 0.183600646 | 1.38E-05 | 9 | 9530068E07Rik |
| 0.636870482  | 0.183730534 | 1.38E-05 | 9 | Cnn2          |
| 0.337685275  | 0.185236659 | 1.39E-05 | 9 | Socs4         |
| 0.572504728  | 0.185537031 | 1.39E-05 | 9 | Ndufb6        |
| -1.875297215 | 0.186051637 | 1.39E-05 | 9 | Vwa5a         |
| 0.449417969  | 0.189133697 | 1.42E-05 | 9 | Apbb1ip       |
| 0.519851435  | 0.189625029 | 1.42E-05 | 9 | Ccdc130       |
| 0.498277328  | 0.192008662 | 1.44E-05 | 9 | Sin3b         |
| 0.399998099  | 0.193511783 | 1.45E-05 | 9 | Dera          |
| 0.423015014  | 0.196170797 | 1.47E-05 | 9 | Kdm2a         |
| 0.662882714  | 0.196992395 | 1.48E-05 | 9 | Cog4          |
| 0.313563746  | 0.197204352 | 1.48E-05 | 9 | Arpc5l        |
| 0.545302609  | 0.198602876 | 1.49E-05 | 9 | Arsb          |

|              |             |          |   |               |
|--------------|-------------|----------|---|---------------|
| 0.391209225  | 0.199411661 | 1.49E-05 | 9 | Cisd3         |
| 0.734723114  | 0.199450717 | 1.49E-05 | 9 | Ppwd1         |
| 0.514345126  | 0.20086678  | 1.50E-05 | 9 | Mphosph10     |
| 0.4483822    | 0.201473268 | 1.51E-05 | 9 | Pbdc1         |
| 0.565295854  | 0.20213535  | 1.51E-05 | 9 | Eif3f         |
| 0.448754314  | 0.20270731  | 1.52E-05 | 9 | Mogs          |
| 0.636092562  | 0.204251099 | 1.53E-05 | 9 | Tbc1d22a      |
| -1.840547974 | 0.205407149 | 1.54E-05 | 9 | Man1c1        |
| 0.294719377  | 0.205586906 | 1.54E-05 | 9 | Alkbh7        |
| 0.467896658  | 0.209774143 | 1.57E-05 | 9 | Abcc3         |
| 0.778364967  | 0.211257399 | 1.58E-05 | 9 | Slc35e1       |
| 0.365009117  | 0.213420026 | 1.60E-05 | 9 | Psip1         |
| -1.338269724 | 0.216578284 | 1.62E-05 | 9 | Ccl4          |
| 0.278365682  | 0.216711018 | 1.62E-05 | 9 | Itpk1         |
| 0.623724571  | 0.219835197 | 1.65E-05 | 9 | Mrpl18        |
| 0.564600084  | 0.221910506 | 1.66E-05 | 9 | Iars          |
| -1.949289346 | 0.224272109 | 1.68E-05 | 9 | Rps6ka1       |
| 0.499208951  | 0.22433134  | 1.68E-05 | 9 | Sec22b        |
| 1.919152129  | 0.229632337 | 1.72E-05 | 9 | Lin54         |
| 0.503917562  | 0.235853768 | 1.77E-05 | 9 | Sin3a         |
| 0.439756415  | 0.23605329  | 1.77E-05 | 9 | Olfml3        |
| 0.531182934  | 0.240010404 | 1.80E-05 | 9 | Rab31         |
| -2.039508424 | 0.242897339 | 1.82E-05 | 9 | Tnfsf9        |
| -1.731266998 | 0.246097651 | 1.84E-05 | 9 | Entpd1        |
| 0.536626775  | 0.246593417 | 1.85E-05 | 9 | Slc7a5        |
| -1.823463995 | 0.246666611 | 1.85E-05 | 9 | Shoc2         |
| 0.398061153  | 0.248601858 | 1.86E-05 | 9 | Usp14         |
| 0.463231985  | 0.248628553 | 1.86E-05 | 9 | Mrpl52        |
| 0.387561948  | 0.249094654 | 1.87E-05 | 9 | Zmynd15       |
| 0.430797874  | 0.250733663 | 1.88E-05 | 9 | Dlgap4        |
| 0.334931012  | 0.250801973 | 1.88E-05 | 9 | Smc4          |
| 0.403526855  | 0.251734892 | 1.89E-05 | 9 | Caprin1       |
| 0.664977423  | 0.257194667 | 1.93E-05 | 9 | Csrp2         |
| 0.305144805  | 0.258943203 | 1.94E-05 | 9 | Arcp2         |
| 0.37394641   | 0.258996839 | 1.94E-05 | 9 | Wdr82         |
| -1.96398293  | 0.262657015 | 1.97E-05 | 9 | 1810043H04Rik |
| 0.32176641   | 0.262741074 | 1.97E-05 | 9 | Lmnb1         |
| 0.512924248  | 0.266201653 | 1.99E-05 | 9 | Slc39a10      |
| 0.895116134  | 0.270016879 | 2.02E-05 | 9 | Hivep1        |
| 0.397778469  | 0.270402972 | 2.03E-05 | 9 | Vkorc1        |
| -1.761853812 | 0.270592487 | 2.03E-05 | 9 | Psen1         |
| 0.606568295  | 0.274396899 | 2.06E-05 | 9 | Krtcap2       |
| 0.532152127  | 0.275718017 | 2.06E-05 | 9 | Nhp2          |
| 0.428415819  | 0.278780192 | 2.09E-05 | 9 | Frmd4a        |
| 0.562081296  | 0.27970429  | 2.09E-05 | 9 | Ctbp2         |
| 0.294209396  | 0.285420729 | 2.14E-05 | 9 | Lrrfip2       |
| 0.353361948  | 0.29159456  | 2.18E-05 | 9 | Igf1r         |
| 0.408081001  | 0.291612729 | 2.18E-05 | 9 | Myo1g         |
| 0.352480788  | 0.294915427 | 2.21E-05 | 9 | Fen1          |
| 1.123850931  | 0.295564994 | 2.21E-05 | 9 | Fam178a       |
| 0.484219515  | 0.295888153 | 2.22E-05 | 9 | Sbds          |
| 0.756695937  | 0.296076214 | 2.22E-05 | 9 | Gclm          |
| 0.325119856  | 0.299280799 | 2.24E-05 | 9 | Il21r         |
| 0.648534386  | 0.302406827 | 2.26E-05 | 9 | Malt1         |
| 0.455101859  | 0.304787368 | 2.28E-05 | 9 | Pfkip         |
| 0.388116496  | 0.306770483 | 2.30E-05 | 9 | Rap2c         |
| -1.973495369 | 0.306856555 | 2.30E-05 | 9 | Msrp1         |
| 0.300497561  | 0.307369037 | 2.30E-05 | 9 | Ctdspl2       |
| 0.681624761  | 0.311305118 | 2.33E-05 | 9 | Tceb3         |
| 1.111185676  | 0.317628954 | 2.38E-05 | 9 | Rfc2          |
| 0.593978729  | 0.317721938 | 2.38E-05 | 9 | Dnaja2        |

|              |             |          |   |               |
|--------------|-------------|----------|---|---------------|
| 0.580825069  | 0.317877408 | 2.38E-05 | 9 | Cd2ap         |
| 0.514287745  | 0.319034111 | 2.39E-05 | 9 | Flot1         |
| 0.329732441  | 0.320590522 | 2.40E-05 | 9 | Lrrc58        |
| 0.51714639   | 0.323010763 | 2.42E-05 | 9 | Ccdc12        |
| 0.329328526  | 0.326774611 | 2.45E-05 | 9 | Phf3          |
| -1.054445978 | 0.326951115 | 2.45E-05 | 9 | Sirpa         |
| -1.946230985 | 0.32999014  | 2.47E-05 | 9 | Atp6v0d2      |
| 0.422193089  | 0.330353719 | 2.47E-05 | 9 | Cd300ld       |
| 0.365040495  | 0.337945121 | 2.53E-05 | 9 | Ptplad2       |
| 0.598821759  | 0.339664796 | 2.54E-05 | 9 | U2surp        |
| 0.359149861  | 0.344241826 | 2.58E-05 | 9 | Dtymk         |
| 0.49784007   | 0.346262624 | 2.59E-05 | 9 | Fam193b       |
| 0.356502631  | 0.349127568 | 2.61E-05 | 9 | Mars          |
| 0.509403684  | 0.350805991 | 2.63E-05 | 9 | Coro1b        |
| 0.375363468  | 0.352797891 | 2.64E-05 | 9 | Cs            |
| -1.726056765 | 0.355278161 | 2.66E-05 | 9 | Rab5c         |
| 0.504897803  | 0.363781313 | 2.72E-05 | 9 | Tnip1         |
| -1.891694435 | 0.365245639 | 2.74E-05 | 9 | Lgals8        |
| 0.259222666  | 0.368122407 | 2.76E-05 | 9 | Cdca8         |
| 0.446196313  | 0.372089059 | 2.79E-05 | 9 | Ncf1          |
| -1.865059264 | 0.377985682 | 2.83E-05 | 9 | Bag3          |
| 0.494249979  | 0.378621278 | 2.84E-05 | 9 | Lsr           |
| 0.379931044  | 0.38001988  | 2.85E-05 | 9 | Sertad1       |
| 0.473801936  | 0.390944801 | 2.93E-05 | 9 | Mrpl10        |
| 0.312419151  | 0.39667388  | 2.97E-05 | 9 | Atmin         |
| 0.478847535  | 0.401458846 | 3.01E-05 | 9 | Taldo1        |
| 0.488379941  | 0.402801058 | 3.02E-05 | 9 | Gipc1         |
| -1.482333277 | 0.406023849 | 3.04E-05 | 9 | Glul          |
| 0.610590942  | 0.41368634  | 3.10E-05 | 9 | Zcrb1         |
| 0.594723774  | 0.415057694 | 3.11E-05 | 9 | Pmepa1        |
| -1.785128896 | 0.418712961 | 3.14E-05 | 9 | Ttc3          |
| -0.821542417 | 0.426191886 | 3.19E-05 | 9 | Sat1          |
| 0.923535176  | 0.43319729  | 3.24E-05 | 9 | Sugp1         |
| 0.465813556  | 0.433884993 | 3.25E-05 | 9 | Os9           |
| 0.527442153  | 0.43393361  | 3.25E-05 | 9 | Glt25d1       |
| 0.314368834  | 0.434618398 | 3.26E-05 | 9 | Map3k6        |
| 0.560936897  | 0.437222102 | 3.27E-05 | 9 | Mrpl20        |
| -1.75205508  | 0.439341322 | 3.29E-05 | 9 | Ankrd12       |
| -1.670204986 | 0.439785389 | 3.29E-05 | 9 | Jun           |
| 0.902154685  | 0.439871995 | 3.29E-05 | 9 | Usp25         |
| 0.506839408  | 0.443112351 | 3.32E-05 | 9 | Camk1d        |
| 0.807609507  | 0.443400199 | 3.32E-05 | 9 | Tmem192       |
| 0.398816026  | 0.44570686  | 3.34E-05 | 9 | Rwdd4a        |
| 0.637409455  | 0.446014109 | 3.34E-05 | 9 | Zfp326        |
| 0.493025518  | 0.446784036 | 3.35E-05 | 9 | Afg3l2        |
| 0.584161617  | 0.4500563   | 3.37E-05 | 9 | Bach2         |
| 0.605385948  | 0.458489015 | 3.43E-05 | 9 | Dis3          |
| 0.589752898  | 0.458963649 | 3.44E-05 | 9 | Unc50         |
| 0.696276607  | 0.461463909 | 3.46E-05 | 9 | Hbp1          |
| 0.346047318  | 0.468358022 | 3.51E-05 | 9 | Tagln2        |
| 1.04753307   | 0.475315193 | 3.56E-05 | 9 | 1110059G10Rik |
| 0.387218152  | 0.475539019 | 3.56E-05 | 9 | Map2k3os      |
| 0.318660851  | 0.476123812 | 3.57E-05 | 9 | Mrps6         |
| 0.396883481  | 0.479096988 | 3.59E-05 | 9 | Emc10         |
| 0.474650435  | 0.481697826 | 3.61E-05 | 9 | Ahi1          |
| 0.462370287  | 0.482141463 | 3.61E-05 | 9 | Pdhb          |
| 0.429444725  | 0.491834274 | 3.68E-05 | 9 | Ppp1r35       |
| 0.532425942  | 0.492058851 | 3.69E-05 | 9 | Brca2         |
| 0.350157669  | 0.494310659 | 3.70E-05 | 9 | Acap3         |
| 0.944040322  | 0.50020111  | 3.75E-05 | 9 | Clcn4-2       |
| 0.452278949  | 0.501265519 | 3.75E-05 | 9 | Akap9         |

|              |             |          |   |               |
|--------------|-------------|----------|---|---------------|
| -1.815457386 | 0.518683057 | 3.88E-05 | 9 | Mea1          |
| 0.55986953   | 0.519041808 | 3.89E-05 | 9 | Cdk2ap2       |
| 0.361721853  | 0.521864733 | 3.91E-05 | 9 | Dcaf8         |
| 0.782366634  | 0.528207454 | 3.96E-05 | 9 | Ech1          |
| -1.748361431 | 0.536973867 | 4.02E-05 | 9 | Snx8          |
| 0.500329875  | 0.539869784 | 4.04E-05 | 9 | Ivns1abp      |
| 0.535822438  | 0.550237996 | 4.12E-05 | 9 | Nrros         |
| 0.65645765   | 0.55041653  | 4.12E-05 | 9 | Cdkn2aipnl    |
| 0.445169497  | 0.556396338 | 4.17E-05 | 9 | Ktn1          |
| 0.412721166  | 0.565497839 | 4.24E-05 | 9 | Rnpep         |
| 1.026358734  | 0.567601595 | 4.25E-05 | 9 | Ccnyl1        |
| 0.295023479  | 0.569857207 | 4.27E-05 | 9 | Mrpl40        |
| -0.660211329 | 0.570448201 | 4.27E-05 | 9 | Ctsh          |
| 0.406387581  | 0.57315736  | 4.29E-05 | 9 | Pld4          |
| 0.429850049  | 0.575034399 | 4.31E-05 | 9 | Thoc6         |
| 0.307871622  | 0.577012081 | 4.32E-05 | 9 | Rrm1          |
| 0.387925518  | 0.578518392 | 4.33E-05 | 9 | Bin2          |
| 0.461109453  | 0.587730515 | 4.40E-05 | 9 | Adcy7         |
| 0.537627355  | 0.600693281 | 4.50E-05 | 9 | Trappc2l      |
| -0.733989535 | 0.606928672 | 4.55E-05 | 9 | Lgmn          |
| 0.464217692  | 0.60797492  | 4.55E-05 | 9 | Vgll4         |
| -1.379337819 | 0.61143013  | 4.58E-05 | 9 | Mafb          |
| 0.600745186  | 0.6137683   | 4.60E-05 | 9 | Dynll2        |
| 0.585034831  | 0.614034613 | 4.60E-05 | 9 | Diap2         |
| 0.6845891    | 0.619220146 | 4.64E-05 | 9 | Isca2         |
| 0.290175569  | 0.620624031 | 4.65E-05 | 9 | Ell2          |
| 0.453647832  | 0.621707837 | 4.66E-05 | 9 | Hint1         |
| 0.263110029  | 0.625517673 | 4.68E-05 | 9 | Mrps26        |
| 0.617382665  | 0.636243924 | 4.77E-05 | 9 | Med20         |
| 0.489849689  | 0.638314225 | 4.78E-05 | 9 | Tppp3         |
| 0.422780502  | 0.63844672  | 4.78E-05 | 9 | Cpne8         |
| 0.717771327  | 0.656060134 | 4.91E-05 | 9 | Ctdsp1        |
| 0.509440635  | 0.658307869 | 4.93E-05 | 9 | Prkaa1        |
| -1.664624328 | 0.663178366 | 4.97E-05 | 9 | Zfp36l2       |
| 0.257881259  | 0.667493904 | 5.00E-05 | 9 | Fam160b1      |
| 0.661490491  | 0.670037487 | 5.02E-05 | 9 | Whamm         |
| 0.518247717  | 0.674369484 | 5.05E-05 | 9 | Pmp22         |
| -1.734479423 | 0.691736588 | 5.18E-05 | 9 | Herc2         |
| 0.281741683  | 0.699598058 | 5.24E-05 | 9 | Tmem30a       |
| 0.429526147  | 0.700413544 | 5.25E-05 | 9 | Ube2b         |
| 0.333695631  | 0.703279936 | 5.27E-05 | 9 | Cdan1         |
| 0.363574166  | 0.708873447 | 5.31E-05 | 9 | Msi2          |
| 0.405858077  | 0.708922527 | 5.31E-05 | 9 | Slc39a14      |
| 0.400688437  | 0.708997944 | 5.31E-05 | 9 | Sugt1         |
| -1.959563409 | 0.712916192 | 5.34E-05 | 9 | Pttg1         |
| 0.405398739  | 0.713622662 | 5.34E-05 | 9 | Jak2          |
| 0.383400787  | 0.736540889 | 5.52E-05 | 9 | Mgat4b        |
| 0.494868872  | 0.741773127 | 5.56E-05 | 9 | Polr2g        |
| 0.565505508  | 0.745769468 | 5.59E-05 | 9 | Timm9         |
| 0.602976488  | 0.750681644 | 5.62E-05 | 9 | Cdipt         |
| 0.428021766  | 0.753095399 | 5.64E-05 | 9 | Hsdl2         |
| 0.649741173  | 0.776245567 | 5.81E-05 | 9 | Ppt1          |
| 0.316786985  | 0.776935136 | 5.82E-05 | 9 | 2310009A05Rik |
| 0.584648461  | 0.777936471 | 5.83E-05 | 9 | Ecd           |
| -1.794692337 | 0.779871122 | 5.84E-05 | 9 | Mrpl36        |
| 0.437115762  | 0.780985785 | 5.85E-05 | 9 | Wdr55         |
| 0.562880068  | 0.78770807  | 5.90E-05 | 9 | Ptpre         |
| 0.286467713  | 0.796641113 | 5.97E-05 | 9 | Tmem97        |
| 0.300569171  | 0.801634882 | 6.00E-05 | 9 | Meaf6         |
| 0.449227904  | 0.816900545 | 6.12E-05 | 9 | Galns         |
| 0.391321107  | 0.816902569 | 6.12E-05 | 9 | Rab10         |

|              |             |          |   |               |
|--------------|-------------|----------|---|---------------|
| 0.444069158  | 0.821931046 | 6.16E-05 | 9 | 1110007C09Rik |
| 0.721688884  | 0.822702414 | 6.16E-05 | 9 | Batf3         |
| 0.520862046  | 0.824407747 | 6.17E-05 | 9 | Cbfa2t2       |
| 0.316243684  | 0.827448313 | 6.20E-05 | 9 | Zbtb44        |
| 0.296017814  | 0.833244722 | 6.24E-05 | 9 | Chrac1        |
| 0.252108047  | 0.847329709 | 6.35E-05 | 9 | Trappc1       |
| -2.026737478 | 0.853269928 | 6.39E-05 | 9 | Hpgd          |
| 0.448783122  | 0.857069746 | 6.42E-05 | 9 | Zc3h14        |
| 0.29686248   | 0.862647279 | 6.46E-05 | 9 | Srsf1         |
| 0.518578901  | 0.869248505 | 6.51E-05 | 9 | Mkks          |
| 0.537055016  | 0.870470953 | 6.52E-05 | 9 | Gpr89         |
| 0.438502967  | 0.875617017 | 6.56E-05 | 9 | Cox6a1        |
| 0.608467301  | 0.875976006 | 6.56E-05 | 9 | Git1          |
| 0.290078997  | 0.880647864 | 6.60E-05 | 9 | Gbf1          |
| 0.500629853  | 0.880661766 | 6.60E-05 | 9 | Exosc10       |
| 0.443771064  | 0.891623891 | 6.68E-05 | 9 | Chd2          |
| 0.273351275  | 0.892416534 | 6.68E-05 | 9 | Bms1          |
| 0.34625922   | 0.893386812 | 6.69E-05 | 9 | Rab6a         |
| 0.430601081  | 0.907084741 | 6.79E-05 | 9 | Fto           |
| 0.515536611  | 0.934256583 | 7.00E-05 | 9 | Tle4          |
| 0.440932792  | 0.9374739   | 7.02E-05 | 9 | Rac2          |
| 0.257417606  | 0.93930601  | 7.03E-05 | 9 | St6gal1       |
| 0.292434541  | 0.948348842 | 7.10E-05 | 9 | Sae1          |
| 0.378615878  | 0.950427856 | 7.12E-05 | 9 | Sf3b5         |
| 0.551502576  | 0.965066624 | 7.23E-05 | 9 | Mrpl55        |
| 0.259808628  | 0.974395208 | 7.30E-05 | 9 | Ubash3b       |
| 0.490707291  | 0.977669697 | 7.32E-05 | 9 | Wbscr22       |
| 0.262522684  | 0.984825229 | 7.38E-05 | 9 | Casp7         |
| -1.90832391  | 0.989132198 | 7.41E-05 | 9 | Rpain         |
| -1.723129201 | 1           | 7.50E-05 | 9 | Ankfy1        |
| 0.386694649  | 1           | 7.54E-05 | 9 | Cdc34         |
| 0.354576411  | 1           | 7.62E-05 | 9 | Pkd2          |
| 0.25452206   | 1           | 7.64E-05 | 9 | Klhdc3        |
| 0.295188312  | 1           | 7.71E-05 | 9 | Rps15         |
| -1.809329956 | 1           | 7.82E-05 | 9 | Chmp2b        |
| 0.422913886  | 1           | 7.84E-05 | 9 | Tm2d2         |
| 0.287359752  | 1           | 7.99E-05 | 9 | Mapk8ip3      |
| -1.939719895 | 1           | 8.00E-05 | 9 | Mrpl34        |
| 0.303698375  | 1           | 8.05E-05 | 9 | Rexo4         |
| 0.254239859  | 1           | 8.20E-05 | 9 | Dbnl          |
| 0.509349753  | 1           | 8.36E-05 | 9 | Rhoc          |
| -1.751495874 | 1           | 8.43E-05 | 9 | Tmem86a       |
| 0.517564865  | 1           | 8.47E-05 | 9 | Psma1         |
| -1.735445911 | 1           | 8.48E-05 | 9 | Galc          |
| 0.252902432  | 1           | 8.60E-05 | 9 | Crem          |
| 0.48616953   | 1           | 8.68E-05 | 9 | Lmna          |
| 0.538121645  | 1           | 8.80E-05 | 9 | Prkd3         |
| 0.533603105  | 1           | 8.89E-05 | 9 | Rps27a        |
| 0.356811319  | 1           | 9.14E-05 | 9 | Larp1b        |
| 0.413306421  | 1           | 9.15E-05 | 9 | Huwe1         |
| 0.258044245  | 1           | 9.18E-05 | 9 | Ddx27         |
| 0.255679451  | 1           | 9.23E-05 | 9 | L1cam         |
| 1.034334511  | 1           | 9.25E-05 | 9 | Hook3         |
| 1.085757527  | 1           | 9.26E-05 | 9 | Ier5l         |
| 0.369737536  | 1           | 9.26E-05 | 9 | Grwd1         |
| 0.385977483  | 1           | 9.27E-05 | 9 | Abca7         |
| 0.2712965    | 1           | 9.27E-05 | 9 | Cks1b         |
| 0.364676812  | 1           | 9.29E-05 | 9 | Fxr1          |
| 0.418019407  | 1           | 9.34E-05 | 9 | Otulin        |
| 0.313430056  | 1           | 9.52E-05 | 9 | Ccl7          |
| -1.537645209 | 1           | 9.69E-05 | 9 | Smarcc2       |

|              |   |           |   |               |
|--------------|---|-----------|---|---------------|
| 0.489692051  | 1 | 9.71E-05  | 9 | Dpep2         |
| 0.398363645  | 1 | 9.94E-05  | 9 | Snx6          |
| 0.408128226  | 1 | 9.95E-05  | 9 | Lilra6        |
| 0.288898128  | 1 | 9.97E-05  | 9 | Ddx49         |
| 0.37536581   | 1 | 0.000101  | 9 | Elov15        |
| 0.382896416  | 1 | 0.0001021 | 9 | Srfbp1        |
| 0.486223102  | 1 | 0.0001032 | 9 | Cdt1          |
| 0.296424236  | 1 | 0.0001055 | 9 | Ndufaf4       |
| 0.356688314  | 1 | 0.0001064 | 9 | Pcm1          |
| 0.262276349  | 1 | 0.0001067 | 9 | Mrpl45        |
| 0.73923904   | 1 | 0.000111  | 9 | Rsl1d1        |
| 0.737951077  | 1 | 0.0001112 | 9 | Ndufb8        |
| 0.37086446   | 1 | 0.0001127 | 9 | Gng2          |
| 0.258433861  | 1 | 0.0001141 | 9 | Tbc1d8        |
| -1.790538313 | 1 | 0.0001148 | 9 | Fam214b       |
| 0.262276349  | 1 | 0.0001162 | 9 | Uchl3         |
| 0.264421505  | 1 | 0.0001164 | 9 | Ccdc132       |
| 0.427884139  | 1 | 0.0001168 | 9 | Ppp2ca        |
| -1.688438566 | 1 | 0.0001172 | 9 | Ifi204        |
| -1.340020668 | 1 | 0.0001177 | 9 | Lmo2          |
| -1.484093418 | 1 | 0.0001185 | 9 | Atraid        |
| -1.66712273  | 1 | 0.0001188 | 9 | Tgfbrap1      |
| 0.377457183  | 1 | 0.0001193 | 9 | Rps19bp1      |
| 0.354710566  | 1 | 0.0001223 | 9 | Slc35b1       |
| 0.272472319  | 1 | 0.0001232 | 9 | Sec14l1       |
| -1.604853759 | 1 | 0.0001239 | 9 | Prex1         |
| 0.338997274  | 1 | 0.000124  | 9 | Fkbp3         |
| 0.467450454  | 1 | 0.0001247 | 9 | Syvn1         |
| 0.443491221  | 1 | 0.0001247 | 9 | Minos1        |
| 0.381721816  | 1 | 0.0001248 | 9 | Rala          |
| 0.522044159  | 1 | 0.0001254 | 9 | Ten1          |
| 0.490353654  | 1 | 0.000126  | 9 | Plcb2         |
| 0.425431667  | 1 | 0.0001263 | 9 | Vapa          |
| 0.259975564  | 1 | 0.0001269 | 9 | Ch25h         |
| -1.84814847  | 1 | 0.000128  | 9 | Fam46a        |
| -1.722574142 | 1 | 0.0001291 | 9 | Mrps18a       |
| 0.264501044  | 1 | 0.0001291 | 9 | Med4          |
| -1.790146305 | 1 | 0.0001296 | 9 | Raph1         |
| 0.532860974  | 1 | 0.0001305 | 9 | Ndufs8        |
| 0.489162416  | 1 | 0.0001317 | 9 | Usp7          |
| -1.721283421 | 1 | 0.0001323 | 9 | Pacs1n2       |
| 0.401961711  | 1 | 0.0001334 | 9 | Mecr          |
| 0.382583171  | 1 | 0.0001339 | 9 | Pcmt1         |
| 0.524292649  | 1 | 0.0001341 | 9 | Map1lc3a      |
| 0.459143085  | 1 | 0.0001349 | 9 | Nkiras2       |
| 0.360540371  | 1 | 0.0001354 | 9 | Anapc16       |
| 0.483877879  | 1 | 0.0001358 | 9 | Edem3         |
| 0.348714724  | 1 | 0.0001362 | 9 | S100a10       |
| -0.60872866  | 1 | 0.0001366 | 9 | Tpm3          |
| 0.356813113  | 1 | 0.000137  | 9 | Yif1b         |
| -1.744394788 | 1 | 0.0001373 | 9 | B230219D22Rik |
| 0.507316885  | 1 | 0.0001376 | 9 | Snhg6         |
| 0.640865177  | 1 | 0.0001378 | 9 | Nek6          |
| 0.274399224  | 1 | 0.0001382 | 9 | 1110058L19Rik |
| 0.335251359  | 1 | 0.0001386 | 9 | Dtd1          |
| -1.411022884 | 1 | 0.0001387 | 9 | Cd164         |
| 0.284075577  | 1 | 0.000139  | 9 | Dgka          |
| -1.798521492 | 1 | 0.0001391 | 9 | Mgat1         |
| -1.751057917 | 1 | 0.0001409 | 9 | Rassf4        |
| 0.334893997  | 1 | 0.0001414 | 9 | Emilin2       |
| 0.559629474  | 1 | 0.0001416 | 9 | Chd9          |

|              |   |           |   |               |
|--------------|---|-----------|---|---------------|
| -1.814501875 | 1 | 0.0001427 | 9 | Lacc1         |
| 0.445618834  | 1 | 0.000143  | 9 | Xiap          |
| 0.925947948  | 1 | 0.0001435 | 9 | Ttc4          |
| 0.408594535  | 1 | 0.0001444 | 9 | Yrdc          |
| 0.442445318  | 1 | 0.0001444 | 9 | Tbrg4         |
| 0.423625229  | 1 | 0.000146  | 9 | Ms4a6d        |
| 0.573011576  | 1 | 0.0001473 | 9 | Hras          |
| 0.615063967  | 1 | 0.0001476 | 9 | Eif3g         |
| -1.741654252 | 1 | 0.0001479 | 9 | Sidt2         |
| 0.401333182  | 1 | 0.0001479 | 9 | Snx24         |
| 0.544462686  | 1 | 0.0001481 | 9 | Vcpip1        |
| 0.304425248  | 1 | 0.0001505 | 9 | Galk2         |
| 0.635577733  | 1 | 0.000152  | 9 | Pld2          |
| 0.286584865  | 1 | 0.0001526 | 9 | Utp3          |
| 0.337068315  | 1 | 0.0001548 | 9 | Dgcr2         |
| 0.39102589   | 1 | 0.0001552 | 9 | Parn          |
| 0.865506015  | 1 | 0.0001556 | 9 | Runx3         |
| 0.302606107  | 1 | 0.0001562 | 9 | Spty2d1       |
| 0.407712727  | 1 | 0.0001566 | 9 | Hsd17b12      |
| 0.485391499  | 1 | 0.0001577 | 9 | Rab3il1       |
| 0.409009671  | 1 | 0.0001578 | 9 | Zmat5         |
| 0.380540269  | 1 | 0.0001587 | 9 | Kcmf1         |
| 0.422288618  | 1 | 0.0001603 | 9 | Bud31         |
| 0.890502428  | 1 | 0.0001629 | 9 | Sms           |
| 0.359819178  | 1 | 0.0001636 | 9 | Tpm4          |
| 0.465608835  | 1 | 0.0001653 | 9 | Usp42         |
| -1.569733523 | 1 | 0.0001668 | 9 | Immt          |
| 0.513966358  | 1 | 0.0001702 | 9 | Anxa3         |
| -1.690581041 | 1 | 0.0001703 | 9 | Mrpl15        |
| 0.359302285  | 1 | 0.0001708 | 9 | Thumpd3       |
| -1.82029295  | 1 | 0.0001717 | 9 | Rgl1          |
| 0.301889996  | 1 | 0.0001737 | 9 | Txn2          |
| 0.543643306  | 1 | 0.0001743 | 9 | Phf6          |
| 0.672534374  | 1 | 0.0001746 | 9 | Ndufb10       |
| -1.820308934 | 1 | 0.0001752 | 9 | Bcl2l11       |
| 0.389349052  | 1 | 0.0001756 | 9 | Psbmb4        |
| -1.900671284 | 1 | 0.0001763 | 9 | Cd38          |
| 0.285653772  | 1 | 0.0001811 | 9 | Rpl41         |
| 0.401016783  | 1 | 0.0001819 | 9 | Eea1          |
| -1.631910768 | 1 | 0.0001831 | 9 | Mbd3          |
| 0.371139656  | 1 | 0.0001843 | 9 | 1110004F10Rik |
| -1.726317897 | 1 | 0.0001848 | 9 | Triap1        |
| 0.364047436  | 1 | 0.000186  | 9 | Dpy30         |
| 0.464998942  | 1 | 0.0001863 | 9 | Fmr1          |
| 0.259143089  | 1 | 0.000187  | 9 | Myo1c         |
| 0.314343722  | 1 | 0.0001874 | 9 | Stmn1         |
| 0.367690672  | 1 | 0.0001881 | 9 | Mef2a         |
| -1.526557352 | 1 | 0.0001914 | 9 | Nucb1         |
| 0.263487736  | 1 | 0.0001952 | 9 | Mlec          |
| 0.35536123   | 1 | 0.0001988 | 9 | Mien1         |
| 0.341838113  | 1 | 0.0001991 | 9 | Mgl2          |
| 0.380755115  | 1 | 0.0001995 | 9 | Itga5         |
| -0.787638555 | 1 | 0.0002003 | 9 | Ier3          |
| 0.563303181  | 1 | 0.000201  | 9 | Hsd17b10      |
| -0.835420611 | 1 | 0.0002039 | 9 | Atp2b1        |
| 0.36668213   | 1 | 0.0002052 | 9 | Strap         |
| 0.330655415  | 1 | 0.0002068 | 9 | Cd37          |
| -1.826567283 | 1 | 0.0002076 | 9 | Cep350        |
| 0.309014727  | 1 | 0.0002086 | 9 | Ppp2r2d       |
| 0.338470863  | 1 | 0.0002111 | 9 | Agl           |
| 0.378605168  | 1 | 0.0002118 | 9 | Tmem208       |

|              |   |           |   |               |
|--------------|---|-----------|---|---------------|
| 0.449429434  | 1 | 0.000212  | 9 | Cd84          |
| 0.36698493   | 1 | 0.0002135 | 9 | Tuba4a        |
| 0.423307789  | 1 | 0.0002155 | 9 | Mrps2         |
| 0.250061948  | 1 | 0.0002184 | 9 | Larp4b        |
| 0.961050657  | 1 | 0.0002203 | 9 | Fdft1         |
| 1.787073037  | 1 | 0.0002208 | 9 | Siglech       |
| -1.635935477 | 1 | 0.000221  | 9 | Dgkz          |
| 0.400748118  | 1 | 0.0002227 | 9 | Ercc3         |
| 0.287132996  | 1 | 0.0002231 | 9 | Chmp1b        |
| -1.836365398 | 1 | 0.0002233 | 9 | Osm           |
| 0.48529082   | 1 | 0.0002239 | 9 | Qdpr          |
| -1.62343183  | 1 | 0.0002243 | 9 | Elf4          |
| 0.282767043  | 1 | 0.0002282 | 9 | Cnih4         |
| -1.524417402 | 1 | 0.0002291 | 9 | Hint2         |
| -1.657854163 | 1 | 0.0002315 | 9 | Cyp4f18       |
| 0.813593334  | 1 | 0.0002347 | 9 | Ddit3         |
| -1.58782948  | 1 | 0.0002352 | 9 | Tbc1d5        |
| -1.726970914 | 1 | 0.0002362 | 9 | Cd300a        |
| 0.435920942  | 1 | 0.0002371 | 9 | Anp32e        |
| 0.944737966  | 1 | 0.0002385 | 9 | Ints3         |
| 0.495260019  | 1 | 0.0002394 | 9 | Ppfibp1       |
| -1.622695864 | 1 | 0.0002402 | 9 | Ptpn23        |
| -1.942658114 | 1 | 0.0002402 | 9 | Trib1         |
| -1.175320837 | 1 | 0.0002407 | 9 | Ccl6          |
| 0.363581291  | 1 | 0.0002411 | 9 | Cd52          |
| 0.279523578  | 1 | 0.0002421 | 9 | Tox4          |
| -1.732126659 | 1 | 0.0002422 | 9 | Rsf1          |
| -1.385173793 | 1 | 0.0002449 | 9 | Tpp1          |
| -1.635032559 | 1 | 0.0002459 | 9 | Tmem261       |
| -1.639799194 | 1 | 0.0002464 | 9 | Man1a         |
| 0.952163542  | 1 | 0.0002474 | 9 | Mfng          |
| 0.415981391  | 1 | 0.0002492 | 9 | Camkk2        |
| 0.3083086    | 1 | 0.0002495 | 9 | Kcnn4         |
| 0.441205171  | 1 | 0.0002512 | 9 | Itgax         |
| 0.754582272  | 1 | 0.0002573 | 9 | AA467197      |
| -1.623840466 | 1 | 0.0002604 | 9 | Kctd10        |
| 0.614799796  | 1 | 0.0002605 | 9 | 1810043G02Rik |
| -1.655196677 | 1 | 0.0002606 | 9 | Fam213b       |
| 0.265568146  | 1 | 0.0002625 | 9 | Rpl23         |
| 1.554683649  | 1 | 0.0002646 | 9 | Gm16062       |
| 0.26284794   | 1 | 0.0002681 | 9 | Nedd1         |
| -1.345518878 | 1 | 0.0002689 | 9 | Rassf2        |
| -1.553757527 | 1 | 0.0002737 | 9 | Tnfaip1       |
| 0.406453291  | 1 | 0.0002754 | 9 | Sap30bp       |
| 0.297615977  | 1 | 0.0002755 | 9 | Slc25a46      |
| -1.002184398 | 1 | 0.0002775 | 9 | Al607873      |
| 0.291755779  | 1 | 0.00028   | 9 | Nemf          |
| 0.25331872   | 1 | 0.0002841 | 9 | Ppapdc1b      |
| 0.481499025  | 1 | 0.0002842 | 9 | Nr4a2         |
| -1.847629585 | 1 | 0.0002845 | 9 | Idh1          |
| 0.272326684  | 1 | 0.0002846 | 9 | Nus1          |
| 0.351643439  | 1 | 0.000285  | 9 | Ralgds        |
| 0.440510091  | 1 | 0.0002852 | 9 | Siae          |
| 0.379907345  | 1 | 0.0002854 | 9 | Usp36         |
| -1.768211554 | 1 | 0.0002879 | 9 | Itpr2         |
| 0.417830311  | 1 | 0.0002894 | 9 | Josd2         |
| -0.582461848 | 1 | 0.0002944 | 9 | Hexa          |
| -0.57386585  | 1 | 0.0002959 | 9 | Rps26         |
| 0.355938363  | 1 | 0.000297  | 9 | Epc2          |
| 0.279491349  | 1 | 0.0002989 | 9 | Pgd           |
| 0.414374342  | 1 | 0.0003018 | 9 | 3110082I17Rik |



|              |   |           |   |               |
|--------------|---|-----------|---|---------------|
| -1.768616379 | 1 | 0.0003033 | 9 | Id3           |
| 0.403207302  | 1 | 0.0003064 | 9 | Crtc3         |
| 0.342096639  | 1 | 0.0003086 | 9 | Dnajb11       |
| -1.766548362 | 1 | 0.0003099 | 9 | Pepd          |
| 0.363637816  | 1 | 0.0003099 | 9 | 2700029M09Rik |
| 0.344124607  | 1 | 0.0003101 | 9 | Ifi30         |
| -1.666943858 | 1 | 0.0003153 | 9 | Ccnl2         |
| 0.364802416  | 1 | 0.0003159 | 9 | Psmc1         |
| -1.553168645 | 1 | 0.0003164 | 9 | Rnf111        |
| -1.568534842 | 1 | 0.000317  | 9 | Irf2bp2       |
| -1.582150867 | 1 | 0.0003246 | 9 | Yeats4        |
| -0.295220643 | 1 | 0.00033   | 9 | Actb          |
| -1.723024214 | 1 | 0.0003329 | 9 | Hvcn1         |
| 0.502539933  | 1 | 0.0003362 | 9 | Pias3         |
| -1.585516563 | 1 | 0.0003364 | 9 | Mob3a         |
| 0.408175208  | 1 | 0.0003372 | 9 | Tes           |
| 0.457187021  | 1 | 0.0003385 | 9 | H2afy         |
| 0.454722072  | 1 | 0.0003386 | 9 | Atp2a3        |
| -1.951748248 | 1 | 0.0003388 | 9 | Fcrls         |
| -0.445090243 | 1 | 0.0003392 | 9 | Npc2          |
| -1.655553415 | 1 | 0.0003461 | 9 | Agtrap        |
| -1.626062336 | 1 | 0.0003464 | 9 | Csnk1e        |
| -1.602208481 | 1 | 0.0003493 | 9 | Nsmce2        |
| -1.524315027 | 1 | 0.0003512 | 9 | Ube3a         |
| -1.631437843 | 1 | 0.0003566 | 9 | Slc25a37      |
| 0.341046842  | 1 | 0.0003584 | 9 | Tnfaip8       |
| -2.023584639 | 1 | 0.0003594 | 9 | Igfbp4        |
| 0.687001374  | 1 | 0.0003609 | 9 | Pygo2         |
| 0.787350354  | 1 | 0.0003629 | 9 | Senp2         |
| 0.360782105  | 1 | 0.0003647 | 9 | B3gnt2        |
| 0.519580651  | 1 | 0.0003671 | 9 | Tmem256       |
| 0.332077168  | 1 | 0.0003781 | 9 | Itgb7         |
| 0.541248349  | 1 | 0.0003818 | 9 | Hipk3         |
| 0.478023041  | 1 | 0.0003822 | 9 | Dock2         |
| 0.440463606  | 1 | 0.0003834 | 9 | Esd           |
| 0.480483556  | 1 | 0.0003858 | 9 | Mgrn1         |
| 0.286516415  | 1 | 0.0003869 | 9 | Ramp1         |
| 0.302451554  | 1 | 0.000387  | 9 | Acadl         |
| -1.489826791 | 1 | 0.0003887 | 9 | Fam63b        |
| 0.412769812  | 1 | 0.0003904 | 9 | Igf1          |
| -1.459835643 | 1 | 0.0003945 | 9 | Tbxas1        |
| 0.311939234  | 1 | 0.0003955 | 9 | Mis18a        |
| -1.864714091 | 1 | 0.0003958 | 9 | Ms4a6b        |
| 0.280543332  | 1 | 0.0003969 | 9 | Rsrc2         |
| 0.5091878    | 1 | 0.0003971 | 9 | Vav3          |
| -1.523801989 | 1 | 0.0003979 | 9 | Opa1          |
| -1.599475493 | 1 | 0.0004029 | 9 | Tra2a         |
| 0.251483157  | 1 | 0.0004032 | 9 | Topbp1        |
| 0.820350116  | 1 | 0.0004041 | 9 | Pafah1b3      |
| 0.3637894    | 1 | 0.0004044 | 9 | Ints1         |
| 0.473510985  | 1 | 0.0004077 | 9 | Cog5          |
| 0.340678667  | 1 | 0.0004091 | 9 | Atp2c1        |
| 0.275771765  | 1 | 0.0004116 | 9 | Adam17        |
| -1.649625276 | 1 | 0.0004157 | 9 | Abcc5         |
| 0.350981963  | 1 | 0.0004168 | 9 | Ets2          |
| -1.674387764 | 1 | 0.0004177 | 9 | Hgsnat        |
| 0.556502151  | 1 | 0.0004224 | 9 | Pdcd6         |
| 0.374544706  | 1 | 0.0004227 | 9 | Psemb1        |
| 0.458979954  | 1 | 0.0004293 | 9 | Cggbp1        |
| -1.593868905 | 1 | 0.0004325 | 9 | Rgl2          |
| 0.25281387   | 1 | 0.000433  | 9 | Mrpl32        |

|              |   |           |   |               |
|--------------|---|-----------|---|---------------|
| -1.503748649 | 1 | 0.0004342 | 9 | Tmem65        |
| -1.642258932 | 1 | 0.0004346 | 9 | Asph          |
| -1.469689786 | 1 | 0.0004373 | 9 | Ostm1         |
| -1.636910071 | 1 | 0.0004379 | 9 | Fam63a        |
| 0.8094898    | 1 | 0.0004418 | 9 | Sart1         |
| -1.697573031 | 1 | 0.0004429 | 9 | Irf2          |
| 0.60093677   | 1 | 0.0004489 | 9 | Nostrin       |
| 0.473510985  | 1 | 0.0004503 | 9 | Sh2d3c        |
| 0.329858651  | 1 | 0.0004526 | 9 | Vipas39       |
| -1.317750408 | 1 | 0.0004625 | 9 | Zfp385a       |
| 0.575601496  | 1 | 0.0004656 | 9 | Rpn2          |
| -1.597729682 | 1 | 0.0004709 | 9 | Maff          |
| 0.364965209  | 1 | 0.0004779 | 9 | Glipr1        |
| 0.316847899  | 1 | 0.000478  | 9 | Cpsf2         |
| -1.561855916 | 1 | 0.0004922 | 9 | Usp16         |
| -1.450045893 | 1 | 0.0004945 | 9 | Ms4a6c        |
| 1.802666408  | 1 | 0.0004946 | 9 | Siglece       |
| 0.333979189  | 1 | 0.0005038 | 9 | Frg1          |
| -1.576591199 | 1 | 0.0005045 | 9 | Evl           |
| 0.302751403  | 1 | 0.0005104 | 9 | Cotl1         |
| -1.639165711 | 1 | 0.0005109 | 9 | Araf          |
| -1.581701157 | 1 | 0.0005113 | 9 | Mtmr3         |
| 1.353239396  | 1 | 0.0005141 | 9 | Caap1         |
| 0.352513703  | 1 | 0.0005164 | 9 | Lpcat2        |
| 0.306766038  | 1 | 0.0005234 | 9 | Spen          |
| 0.571645974  | 1 | 0.0005287 | 9 | Herpud1       |
| 0.336714045  | 1 | 0.0005411 | 9 | Fam53a        |
| 0.424148117  | 1 | 0.0005475 | 9 | Slc25a12      |
| -1.38722837  | 1 | 0.0005552 | 9 | Nipbl         |
| -1.68648687  | 1 | 0.00056   | 9 | Clec10a       |
| 0.983919038  | 1 | 0.000563  | 9 | Cmtr1         |
| -1.680217835 | 1 | 0.000568  | 9 | Igsf6         |
| -1.481881905 | 1 | 0.0005728 | 9 | Mon2          |
| 0.322104991  | 1 | 0.0005782 | 9 | H13           |
| 0.429103604  | 1 | 0.0005783 | 9 | Cib1          |
| 0.389854651  | 1 | 0.0005804 | 9 | Gmppa         |
| -1.527232972 | 1 | 0.000593  | 9 | Nipsnap3b     |
| -1.373733942 | 1 | 0.0005931 | 9 | Cln3          |
| -1.784521744 | 1 | 0.0005955 | 9 | 1110008P14Rik |
| 0.352605325  | 1 | 0.0006064 | 9 | Tmed9         |
| 0.453498684  | 1 | 0.0006128 | 9 | Lims1         |
| 0.348888494  | 1 | 0.0006159 | 9 | Srrm1         |
| 0.396359942  | 1 | 0.0006226 | 9 | Vav1          |
| -1.532969101 | 1 | 0.0006287 | 9 | Adam19        |
| -1.576964213 | 1 | 0.0006312 | 9 | Fnta          |
| 0.891210794  | 1 | 0.0006326 | 9 | Itsn2         |
| 0.386345263  | 1 | 0.0006328 | 9 | Vamp3         |
| 0.278836798  | 1 | 0.0006338 | 9 | Ddx42         |
| -1.658076747 | 1 | 0.0006364 | 9 | Mxd1          |
| 0.404361743  | 1 | 0.0006481 | 9 | Anks1         |
| 0.373001684  | 1 | 0.00065   | 9 | Ptp4a3        |
| 0.321762218  | 1 | 0.0006506 | 9 | Kdm1a         |
| -1.647167386 | 1 | 0.0006508 | 9 | Hspa1a        |
| 0.31066442   | 1 | 0.0006513 | 9 | Csrp1         |
| -1.523656656 | 1 | 0.0006552 | 9 | Herpud2       |
| 1.786904486  | 1 | 0.000656  | 9 | Trmt2a        |
| -1.538087454 | 1 | 0.000662  | 9 | Sep.09        |
| -1.474157563 | 1 | 0.0006665 | 9 |               |
| -1.574031497 | 1 | 0.0006733 | 9 |               |
| -1.465264198 | 1 | 0.0006763 | 9 |               |
| 0.27587299   | 1 | 0.0006774 | 9 |               |
|              |   |           |   | Psmc4         |
|              |   |           |   | Bmpr2         |
|              |   |           |   | Vps37a        |
|              |   |           |   | Cpsf1         |

|              |   |           |   |               |
|--------------|---|-----------|---|---------------|
| 0.315418827  | 1 | 0.0006849 | 9 | Ahcyl1        |
| 0.28308526   | 1 | 0.0006893 | 9 | Pole4         |
| 0.396315923  | 1 | 0.0006919 | 9 | Atpif1        |
| 0.414070257  | 1 | 0.0006919 | 9 | Tuba1b        |
| -1.493502455 | 1 | 0.0006936 | 9 | Nagpa         |
| 0.362292763  | 1 | 0.0006967 | 9 | Psme2b        |
| 0.277318894  | 1 | 0.0007004 | 9 | Map2k3        |
| -1.532886845 | 1 | 0.000703  | 9 | Ino80d        |
| -1.412895798 | 1 | 0.0007115 | 9 | Pacs2         |
| 0.270609425  | 1 | 0.0007144 | 9 | Atp6v0a2      |
| 0.399865895  | 1 | 0.0007161 | 9 | Ppap2c        |
| -1.463011236 | 1 | 0.0007199 | 9 | Ywhaq         |
| -1.601740499 | 1 | 0.0007237 | 9 | Kcnk6         |
| -1.620945662 | 1 | 0.0007286 | 9 | Thbs1         |
| -1.543859363 | 1 | 0.0007304 | 9 | Mylip         |
| 0.334603018  | 1 | 0.0007366 | 9 | Fgr           |
| 0.372276229  | 1 | 0.000744  | 9 | Sptbn1        |
| 0.359282799  | 1 | 0.0007461 | 9 | Pafah1b2      |
| 0.489832753  | 1 | 0.0007501 | 9 | Narf          |
| -1.765417535 | 1 | 0.0007552 | 9 | Gas6          |
| 0.303444472  | 1 | 0.0007566 | 9 | Phpt1         |
| -1.469753337 | 1 | 0.0007581 | 9 | Prkag1        |
| -1.582581452 | 1 | 0.0007605 | 9 | Aoah          |
| 1.097569763  | 1 | 0.0007641 | 9 | Taz           |
| -1.512659304 | 1 | 0.0007687 | 9 | Cmklr1        |
| 0.346513652  | 1 | 0.0007746 | 9 | Tnfrsf1a      |
| -1.497176356 | 1 | 0.0007784 | 9 | Snhg12        |
| -1.308123691 | 1 | 0.0007838 | 9 | Hist1h2bc     |
| 0.309736073  | 1 | 0.0007849 | 9 | Soat1         |
| -1.434983459 | 1 | 0.0007857 | 9 | Trim47        |
| 0.299505224  | 1 | 0.0007944 | 9 | Mtfr1l        |
| -1.574774311 | 1 | 0.0007955 | 9 | Snw1          |
| 0.440719721  | 1 | 0.0007967 | 9 | Sssca1        |
| 0.75769151   | 1 | 0.000797  | 9 | Nckipsd       |
| -1.612472816 | 1 | 0.000798  | 9 | Rap1gds1      |
| -1.513489231 | 1 | 0.0007982 | 9 | Hspbp1        |
| -1.54377506  | 1 | 0.0008019 | 9 | Aldh9a1       |
| -1.529610097 | 1 | 0.0008031 | 9 | Rb1           |
| 0.29124491   | 1 | 0.0008034 | 9 | Ccdc47        |
| -1.808208949 | 1 | 0.0008092 | 9 | F10           |
| 0.391050012  | 1 | 0.0008127 | 9 | Camsap2       |
| -1.584355257 | 1 | 0.000815  | 9 | C3            |
| 0.394584     | 1 | 0.0008166 | 9 | Wdr5          |
| -1.435999229 | 1 | 0.0008244 | 9 | Rmnd5a        |
| -1.547641765 | 1 | 0.0008249 | 9 | Bbip1         |
| 0.488843757  | 1 | 0.0008288 | 9 | Nol7          |
| -0.652294661 | 1 | 0.0008342 | 9 | Cd63          |
| 0.282233574  | 1 | 0.0008345 | 9 | Dnajc9        |
| -1.440412482 | 1 | 0.0008347 | 9 | Tm7sf3        |
| -1.521758121 | 1 | 0.0008367 | 9 | Rfk           |
| -1.528911529 | 1 | 0.0008371 | 9 | Traf7         |
| -0.637412365 | 1 | 0.000838  | 9 | Tnfaip3       |
| -1.206697743 | 1 | 0.0008396 | 9 | Serf2         |
| -1.486995634 | 1 | 0.0008481 | 9 | Rgcc          |
| 1.137378933  | 1 | 0.0008518 | 9 | 1110038B12Rik |
| -1.471086966 | 1 | 0.0008564 | 9 | Dcaf7         |
| -1.461915189 | 1 | 0.0008619 | 9 | Dpp7          |
| 0.320049975  | 1 | 0.0008638 | 9 | Mrpl33        |
| -1.615963221 | 1 | 0.0008658 | 9 | Acbd5         |
| -1.49414211  | 1 | 0.0008801 | 9 | Ccrn4l        |
| -1.623971945 | 1 | 0.0008828 | 9 | Preb          |

|              |   |           |   |          |
|--------------|---|-----------|---|----------|
| 0.37684111   | 1 | 0.0008954 | 9 | Eif3c    |
| -1.507220327 | 1 | 0.0008994 | 9 | Sec13    |
| -1.499338051 | 1 | 0.0009002 | 9 | Pdxdc1   |
| -1.441495658 | 1 | 0.0009006 | 9 | Pdia4    |
| 0.413069707  | 1 | 0.0009146 | 9 | Ola1     |
| 0.27558308   | 1 | 0.000917  | 9 | Cpped1   |
| -1.674231133 | 1 | 0.00092   | 9 | Taf3     |
| -1.567760302 | 1 | 0.000922  | 9 | Nufip2   |
| 0.411494506  | 1 | 0.0009298 | 9 | Rad23a   |
| 0.376248919  | 1 | 0.0009506 | 9 | Etfa     |
| 0.555267079  | 1 | 0.0009605 | 9 | Zfp954   |
| -0.456999978 | 1 | 0.0009686 | 9 | Pabpc1   |
| 0.280794979  | 1 | 0.0009688 | 9 | Tcn2     |
| -1.49153398  | 1 | 0.0009732 | 9 | Deptor   |
| -1.399925205 | 1 | 0.0009748 | 9 | Slc7a7   |
| 0.351501585  | 1 | 0.0009923 | 9 | Mrpl17   |
| -1.39189917  | 1 | 0.0010147 | 9 | Dap      |
| -1.554562805 | 1 | 0.0010242 | 9 | Dennd1a  |
| -1.039004638 | 1 | 0.0010244 | 9 | Lyz1     |
| 0.48281423   | 1 | 0.001025  | 9 | Psmb8    |
| 0.334126275  | 1 | 0.0010324 | 9 | Surf4    |
| 0.314019587  | 1 | 0.001036  | 9 | Lig1     |
| 0.481609435  | 1 | 0.0010374 | 9 | Aspscr1  |
| 0.377120467  | 1 | 0.0010554 | 9 | Xpnpep1  |
| -1.524409045 | 1 | 0.0010678 | 9 | Arl11    |
| -0.282049516 | 1 | 0.0011056 | 9 | Jund     |
| 0.600372193  | 1 | 0.0011071 | 9 | Akt1     |
| -1.278124326 | 1 | 0.0011094 | 9 | Srsf9    |
| 0.285492338  | 1 | 0.0011265 | 9 | Srf      |
| -1.331512662 | 1 | 0.0011358 | 9 | Odf2     |
| -1.480372905 | 1 | 0.0011424 | 9 | Atp11c   |
| -1.617305016 | 1 | 0.0011427 | 9 | Ctla2b   |
| -1.488264222 | 1 | 0.0011472 | 9 | Ccdc115  |
| 0.254577126  | 1 | 0.0011503 | 9 | Rfc3     |
| -0.827280833 | 1 | 0.0011503 | 9 | Unc93b1  |
| 0.485449912  | 1 | 0.0011552 | 9 | Arsk     |
| -1.446057145 | 1 | 0.001159  | 9 | Srd5a3   |
| -1.800706446 | 1 | 0.0011607 | 9 | C4b      |
| 0.39727821   | 1 | 0.0011613 | 9 | Cmc1     |
| -1.482302771 | 1 | 0.001162  | 9 | Mrpl24   |
| 0.39508828   | 1 | 0.0011625 | 9 | Rbms1    |
| -1.658723977 | 1 | 0.0011664 | 9 | Egr1     |
| 0.261419573  | 1 | 0.0011875 | 9 | Ttc9c    |
| -1.173089119 | 1 | 0.0011905 | 9 | Wsb1     |
| -1.500848463 | 1 | 0.0012004 | 9 | Cyhr1    |
| -0.655841858 | 1 | 0.001202  | 9 | Sh3glb1  |
| 0.383232114  | 1 | 0.0012132 | 9 | Rplp2    |
| -1.458987663 | 1 | 0.0012179 | 9 | Rbm28    |
| 0.724718023  | 1 | 0.0012301 | 9 | Noc3l    |
| -1.402190728 | 1 | 0.0012338 | 9 | Stag1    |
| 0.395905494  | 1 | 0.0012377 | 9 | Limd2    |
| -1.370183653 | 1 | 0.0012423 | 9 | Tmem176b |
| -0.264461517 | 1 | 0.0012429 | 9 | Tmsb4x   |
| 0.335685831  | 1 | 0.0012481 | 9 | Gm2a     |
| -1.454117948 | 1 | 0.001256  | 9 | Ganab    |
| -1.570817299 | 1 | 0.0012644 | 9 | Lbh      |
| -1.34546625  | 1 | 0.0012723 | 9 | Ppfia1   |
| 0.507979953  | 1 | 0.0012835 | 9 | Pkn1     |
| 0.328999688  | 1 | 0.0012856 | 9 | Snrnp200 |
| -1.610225624 | 1 | 0.0012907 | 9 | Ubqln2   |
| 0.400436834  | 1 | 0.0012913 | 9 | Pgk1     |

|              |   |           |   |               |
|--------------|---|-----------|---|---------------|
| -1.501125637 | 1 | 0.0012969 | 9 | Stx5a         |
| -1.600172964 | 1 | 0.0012973 | 9 | Tbc1d1        |
| -1.484115664 | 1 | 0.0013026 | 9 | Lpxn          |
| -1.475961782 | 1 | 0.0013215 | 9 | Psmc10        |
| -1.549152352 | 1 | 0.0013224 | 9 | Clec4n        |
| -1.471180111 | 1 | 0.0013301 | 9 | Fbxo32        |
| -1.410029972 | 1 | 0.0013356 | 9 | Carkd         |
| -1.393348191 | 1 | 0.0013462 | 9 | Wls           |
| 0.276064185  | 1 | 0.0013478 | 9 | Map3k1        |
| -1.515112275 | 1 | 0.0013503 | 9 | Mical1        |
| -1.52218033  | 1 | 0.0013535 | 9 | Parvg         |
| 0.283609241  | 1 | 0.0013555 | 9 | Vac14         |
| -1.492975907 | 1 | 0.0013567 | 9 | Dnm1l         |
| 0.28461668   | 1 | 0.0013645 | 9 | Ndufb9        |
| -0.879495477 | 1 | 0.0013683 | 9 | Comt          |
| -1.55184264  | 1 | 0.0013915 | 9 | Pdrg1         |
| -1.719709857 | 1 | 0.0013935 | 9 | Ly6a          |
| -1.150359051 | 1 | 0.0013945 | 9 | Ppp1r15a      |
| 0.289053823  | 1 | 0.0013998 | 9 | Wdfy3         |
| -1.547603662 | 1 | 0.0014208 | 9 | Cpsf7         |
| 0.749588961  | 1 | 0.0014247 | 9 | Rnf4          |
| 0.277897729  | 1 | 0.0014366 | 9 | Sparc         |
| -1.427038983 | 1 | 0.0014509 | 9 | Ptgr1         |
| -1.538093563 | 1 | 0.0014517 | 9 | Slc38a6       |
| 0.336478134  | 1 | 0.0014527 | 9 | Fis1          |
| -1.49218665  | 1 | 0.0014546 | 9 | Creld2        |
| -0.784532767 | 1 | 0.001458  | 9 | Mir703        |
| 0.29878308   | 1 | 0.0014647 | 9 | Cct7          |
| -1.468503582 | 1 | 0.0014664 | 9 | Larp7         |
| 0.315481087  | 1 | 0.0014711 | 9 | Nenf          |
| -1.36676249  | 1 | 0.0014842 | 9 | Sec24a        |
| 0.328110947  | 1 | 0.0014909 | 9 | Alg3          |
| 0.268862248  | 1 | 0.0014928 | 9 | Cul1          |
| -1.799489486 | 1 | 0.0015012 | 9 | Dusp6         |
| 0.256144394  | 1 | 0.0015033 | 9 | Gpn2          |
| 0.422646676  | 1 | 0.0015043 | 9 | Bre           |
| -1.426342362 | 1 | 0.0015142 | 9 | Psmc6         |
| -1.503048345 | 1 | 0.0015335 | 9 | Akirin2       |
| 0.311743872  | 1 | 0.0015518 | 9 | Mknk1         |
| -1.373949719 | 1 | 0.001557  | 9 | Col4a3bp      |
| 0.475772706  | 1 | 0.0015576 | 9 | Erp44         |
| 0.539756668  | 1 | 0.0015677 | 9 | Mettl5        |
| -1.548426369 | 1 | 0.0015702 | 9 | Arid4a        |
| 0.600806256  | 1 | 0.0015807 | 9 | Gigyf2        |
| 0.549533176  | 1 | 0.0015871 | 9 | 1110012L19Rik |
| -1.5290561   | 1 | 0.0015923 | 9 | Dnajb4        |
| -1.598155941 | 1 | 0.0015938 | 9 | Nme3          |
| 0.384005937  | 1 | 0.0015943 | 9 | Ppt2          |
| 0.977501326  | 1 | 0.0015961 | 9 | Psmf1         |
| -1.214933378 | 1 | 0.0016019 | 9 | Sgpl1         |
| 0.538518111  | 1 | 0.0016126 | 9 | Rpia          |
| 0.295349606  | 1 | 0.0016145 | 9 | Basp1         |
| -1.341545825 | 1 | 0.0016334 | 9 | Aga           |
| -1.343314172 | 1 | 0.0016343 | 9 | Zzz3          |
| -1.351416236 | 1 | 0.001644  | 9 | Polr2a        |
| -0.329979179 | 1 | 0.0016452 | 9 | C1qb          |
| 0.295641246  | 1 | 0.0016568 | 9 | Slc25a39      |
| 0.704820465  | 1 | 0.0016596 | 9 | Eapp          |
| -1.528462192 | 1 | 0.001661  | 9 | Naa60         |
| -1.550274988 | 1 | 0.0016694 | 9 | Scnm1         |
| -1.430139282 | 1 | 0.0016718 | 9 | Tanc2         |

|              |   |           |   |               |
|--------------|---|-----------|---|---------------|
| -1.594452583 | 1 | 0.0016723 | 9 | Cept1         |
| -1.539871155 | 1 | 0.0016762 | 9 | Ccl8          |
| -1.133093057 | 1 | 0.0016769 | 9 | Nr4a1         |
| -1.474108829 | 1 | 0.0016779 | 9 | Ankrd40       |
| 0.375730387  | 1 | 0.0016905 | 9 | Tmem205       |
| 0.270612153  | 1 | 0.0017064 | 9 | Mbnl2         |
| 0.868667351  | 1 | 0.001707  | 9 | Sntb2         |
| -1.5480151   | 1 | 0.0017074 | 9 | Ezh1          |
| 0.297001376  | 1 | 0.0017153 | 9 | Epn1          |
| -1.580990678 | 1 | 0.001717  | 9 | Rab35         |
| 0.379756686  | 1 | 0.0017288 | 9 | Nufip1        |
| -1.166092678 | 1 | 0.0017576 | 9 | Spns1         |
| -1.427116356 | 1 | 0.0017852 | 9 | Gls           |
| -1.363565956 | 1 | 0.0017884 | 9 | Arpc1a        |
| -1.44345648  | 1 | 0.0017909 | 9 | Klhl9         |
| -1.435590983 | 1 | 0.0017975 | 9 | Rnd3          |
| -0.799110228 | 1 | 0.0018016 | 9 | Ifitm2        |
| -1.293776243 | 1 | 0.0018235 | 9 | Sptssa        |
| -1.345091395 | 1 | 0.0018253 | 9 | Prcp          |
| -1.348797291 | 1 | 0.0018273 | 9 | Ccdc86        |
| -1.422385648 | 1 | 0.0018297 | 9 | Prune2        |
| 0.721848651  | 1 | 0.001837  | 9 | Tbce          |
| 0.260021219  | 1 | 0.0018436 | 9 | M6pr          |
| -1.384049129 | 1 | 0.0018511 | 9 | Plekhm3       |
| -1.644399339 | 1 | 0.0018748 | 9 | Trim30a       |
| -0.698933118 | 1 | 0.0018926 | 9 | Rps7          |
| 0.265380178  | 1 | 0.0018929 | 9 | Actr10        |
| 0.346492214  | 1 | 0.0018968 | 9 | Cox8a         |
| -1.450666645 | 1 | 0.0019212 | 9 | Wrn           |
| 0.283924753  | 1 | 0.0019264 | 9 | Ccl2          |
| -1.4900189   | 1 | 0.0019272 | 9 | Arglu1        |
| -1.525684026 | 1 | 0.0019317 | 9 | Mrpl11        |
| -1.486983475 | 1 | 0.0019486 | 9 | Ppp1r21       |
| -1.482379034 | 1 | 0.0019606 | 9 | Ctsk          |
| -1.405452035 | 1 | 0.0019635 | 9 | Rbl2          |
| -1.590694685 | 1 | 0.0019664 | 9 | Hagh          |
| -1.434209131 | 1 | 0.0019678 | 9 | Gnptg         |
| -1.487367064 | 1 | 0.0019844 | 9 | Grsf1         |
| 0.308754722  | 1 | 0.0019905 | 9 | Rtn3          |
| -1.546597731 | 1 | 0.0019954 | 9 | Dnajc13       |
| -1.592860253 | 1 | 0.0019981 | 9 | Rcn3          |
| -1.476559425 | 1 | 0.0020185 | 9 | Xdh           |
| -1.399947621 | 1 | 0.0020468 | 9 | Nup88         |
| -1.496959929 | 1 | 0.00206   | 9 | 2810004N23Rik |
| -1.387600628 | 1 | 0.0020713 | 9 | Cd300lf       |
| -1.096746302 | 1 | 0.0020852 | 9 | Tnf           |
| -1.415599615 | 1 | 0.0021023 | 9 | Stard7        |
| -1.444982874 | 1 | 0.0021051 | 9 | Gga2          |
| 0.962178969  | 1 | 0.0021156 | 9 | Tomm20        |
| -1.385649408 | 1 | 0.0021231 | 9 | Mat2a         |
| -0.291119989 | 1 | 0.0021282 | 9 | NP-904340.1   |
| -2.015964391 | 1 | 0.00214   | 9 | Lyve1         |
| -0.280631    | 1 | 0.002145  | 9 | Ctss          |
| -1.398669121 | 1 | 0.0021506 | 9 | Psme4         |
| -1.554159141 | 1 | 0.0021554 | 9 | Acox1         |
| 0.751571088  | 1 | 0.0021795 | 9 | Ubr1          |
| 0.395318065  | 1 | 0.0021826 | 9 | Eef1d         |
| -1.436485609 | 1 | 0.0021871 | 9 | Tpst2         |
| 0.275624662  | 1 | 0.0021889 | 9 | Glud1         |
| -1.334695614 | 1 | 0.0022046 | 9 | Cd2bp2        |
| -1.359400646 | 1 | 0.0022085 | 9 | Gas2l3        |

|              |   |           |   |               |
|--------------|---|-----------|---|---------------|
| 0.285102834  | 1 | 0.0022112 | 9 | Rps11         |
| -1.378039884 | 1 | 0.0022508 | 9 | Arhgap4       |
| 0.769700163  | 1 | 0.0022591 | 9 | Egln1         |
| -1.616596533 | 1 | 0.0022852 | 9 | Cd274         |
| -1.004328956 | 1 | 0.0022888 | 9 | Dbi           |
| -1.346502617 | 1 | 0.0022952 | 9 | Xrn2          |
| -1.373807982 | 1 | 0.0023006 | 9 | 4833420G17Rik |
| -1.404159824 | 1 | 0.0023025 | 9 | Gorasp2       |
| -1.517382553 | 1 | 0.0023026 | 9 | Soga1         |
| -1.463844498 | 1 | 0.0023134 | 9 | Prdm2         |
| -1.281632076 | 1 | 0.0023263 | 9 | Ptprj         |
| -1.50098566  | 1 | 0.0023349 | 9 | Ttyh3         |
| -1.428697661 | 1 | 0.0023478 | 9 | Arhgef7       |
| -1.352109304 | 1 | 0.0023635 | 9 | Naglu         |
| 0.520964837  | 1 | 0.0023703 | 9 | Slc25a15      |
| -0.964620258 | 1 | 0.0023832 | 9 | Tgfb1         |
| 0.304368991  | 1 | 0.002386  | 9 | Atad5         |
| -1.491121152 | 1 | 0.0024039 | 9 | Scimp         |
| -1.648323798 | 1 | 0.0024045 | 9 | Lifr          |
| -1.519432785 | 1 | 0.0024116 | 9 | 2810428I15Rik |
| -1.403179191 | 1 | 0.0024156 | 9 | Trim27        |
| -1.404502818 | 1 | 0.0024163 | 9 | Nt5c2         |
| 0.29983945   | 1 | 0.0024314 | 9 | Rpl27         |
| -1.150103383 | 1 | 0.002432  | 9 | Pxn           |
| 0.699575631  | 1 | 0.0024603 | 9 | Hps5          |
| -1.233177426 | 1 | 0.0024615 | 9 | Anapc2        |
| -1.297001231 | 1 | 0.0025003 | 9 | Cyth1         |
| -1.29086684  | 1 | 0.0025031 | 9 | Fabp5         |
| 0.303107944  | 1 | 0.0025054 | 9 | Gpnmh         |
| -1.427163531 | 1 | 0.0025112 | 9 | Smchd1        |
| 0.843022918  | 1 | 0.0025198 | 9 | Atl2          |
| -1.452025957 | 1 | 0.0025268 | 9 | Rapgef1       |
| -1.304194413 | 1 | 0.0025275 | 9 | Specc1        |
| -1.347595755 | 1 | 0.0025283 | 9 | Ndufaf2       |
| -0.814998124 | 1 | 0.0025397 | 9 | Sirt2         |
| -1.587475538 | 1 | 0.0025509 | 9 | Nfatc1        |
| -1.353975034 | 1 | 0.0025522 | 9 | Zfp704        |
| 0.256578327  | 1 | 0.0025523 | 9 | Tbk1          |
| -1.397673601 | 1 | 0.0025619 | 9 | Snx27         |
| -1.34411102  | 1 | 0.0025795 | 9 | Mmp12         |
| -1.312037591 | 1 | 0.0025869 | 9 | Zfp281        |
| -1.282168844 | 1 | 0.002588  | 9 | Tmem165       |
| -1.394870062 | 1 | 0.0026044 | 9 | R3hdm1        |
| -1.371065688 | 1 | 0.0026167 | 9 | Zfp36l1       |
| -1.486343628 | 1 | 0.0026269 | 9 | Pagr1a        |
| -1.594497719 | 1 | 0.0026383 | 9 | Fam126a       |
| -1.636366286 | 1 | 0.0026423 | 9 | Gsr           |
| -1.354857588 | 1 | 0.0026428 | 9 | 2310035C23Rik |
| -1.435821106 | 1 | 0.0026431 | 9 | Nosip         |
| 0.319274575  | 1 | 0.0026443 | 9 | Eif1ax        |
| -1.549930896 | 1 | 0.0026592 | 9 | Klf9          |
| -1.528152186 | 1 | 0.0026601 | 9 | Vaultrc5      |
| -1.346373076 | 1 | 0.0026812 | 9 | Foxn2         |
| -1.405214815 | 1 | 0.0026944 | 9 | Inpp5f        |
| -1.359691036 | 1 | 0.0026946 | 9 | Ttc14         |
| -1.374621077 | 1 | 0.0027034 | 9 | Ccdc127       |
| -1.343314172 | 1 | 0.0027038 | 9 | Chchd7        |
| -1.386777803 | 1 | 0.0027046 | 9 | Sh3glb2       |
| 0.275260893  | 1 | 0.0027064 | 9 | Uqcrq         |
| -1.441001275 | 1 | 0.0027166 | 9 | Ndufa10       |
| 0.273400854  | 1 | 0.0027173 | 9 | Anxa2         |

|              |   |           |   |               |
|--------------|---|-----------|---|---------------|
| 0.267211584  | 1 | 0.0027423 | 9 | Got2          |
| -1.450908957 | 1 | 0.0027448 | 9 | Taf1          |
| -1.410210882 | 1 | 0.0027465 | 9 | Vegfa         |
| 0.455423205  | 1 | 0.0027535 | 9 | Stau1         |
| -0.739055567 | 1 | 0.002756  | 9 | lfrd1         |
| -1.459677372 | 1 | 0.0027634 | 9 | Znfx1         |
| -1.354358461 | 1 | 0.0027667 | 9 | Rtca          |
| -1.336221944 | 1 | 0.0027668 | 9 | Ptafr         |
| -1.505120726 | 1 | 0.0027824 | 9 | Brd1          |
| -1.413673942 | 1 | 0.002805  | 9 | Trim41        |
| -1.547960531 | 1 | 0.0028223 | 9 | Gla           |
| -1.390877652 | 1 | 0.002829  | 9 | Mettl6        |
| -1.607986182 | 1 | 0.0028458 | 9 | Plekha2       |
| 0.35177059   | 1 | 0.0028512 | 9 | Gbas          |
| 0.863267926  | 1 | 0.0028564 | 9 | Dock1         |
| -1.367748198 | 1 | 0.0028888 | 9 | Crybg3        |
| -1.473748902 | 1 | 0.0028912 | 9 | Tsc22d1       |
| -1.470864818 | 1 | 0.0028932 | 9 | Fam20b        |
| -1.513489231 | 1 | 0.0028957 | 9 | Tagap         |
| -1.361819326 | 1 | 0.0028957 | 9 | Atxn2         |
| 0.284289962  | 1 | 0.0029294 | 9 | Gpr137b       |
| -1.166806585 | 1 | 0.0029302 | 9 | Ormdl2        |
| -0.388684608 | 1 | 0.0029393 | 9 | H3f3b         |
| 0.33782125   | 1 | 0.0029508 | 9 | Clpp          |
| -0.702847511 | 1 | 0.0029561 | 9 | Rpl39         |
| 0.347278895  | 1 | 0.0029703 | 9 | lfngr1        |
| -1.408400312 | 1 | 0.0029802 | 9 | Tns1          |
| -1.351696118 | 1 | 0.002982  | 9 | Glrx5         |
| -1.432968604 | 1 | 0.0029821 | 9 | 1810013L24Rik |
| -1.599556889 | 1 | 0.0030002 | 9 | Smarcd2       |
| -1.084204388 | 1 | 0.0030012 | 9 | Bcl6          |
| -1.345479478 | 1 | 0.0030072 | 9 | Chka          |
| -1.425877678 | 1 | 0.0030245 | 9 | B9d2          |
| -1.38330359  | 1 | 0.003028  | 9 | Fbxw7         |
| -1.49218665  | 1 | 0.0030291 | 9 | Bcor          |
| -1.407736195 | 1 | 0.0030429 | 9 | Stk40         |
| -1.300148282 | 1 | 0.0030675 | 9 | Klf13         |
| 0.289140585  | 1 | 0.003082  | 9 | Atxn3         |
| -1.408508614 | 1 | 0.0030883 | 9 | Mllt10        |
| -1.27083575  | 1 | 0.0030974 | 9 | Rfwd2         |
| -1.376812826 | 1 | 0.0031026 | 9 | Atf2          |
| -1.327320709 | 1 | 0.0031211 | 9 | Tor3a         |
| -1.307697343 | 1 | 0.0031247 | 9 | Apoa1bp       |
| 0.299628418  | 1 | 0.0031299 | 9 | Uba1          |
| 0.277772518  | 1 | 0.0031312 | 9 | Stk17b        |
| 0.296604921  | 1 | 0.0031413 | 9 | Cd93          |
| -1.369716702 | 1 | 0.0031629 | 9 | Parp9         |
| -1.230409425 | 1 | 0.0031666 | 9 | Dpf2          |
| 1.413732118  | 1 | 0.0031723 | 9 | Slc17a5       |
| -1.28604575  | 1 | 0.0031809 | 9 | Rnf115        |
| 0.441638882  | 1 | 0.0032002 | 9 | Flna          |
| 0.328197821  | 1 | 0.0032133 | 9 | 2310047M10Rik |
| -1.174167796 | 1 | 0.0032136 | 9 | Sft2d1        |
| -1.28958153  | 1 | 0.0032235 | 9 | Sik1          |
| -1.23829013  | 1 | 0.0032302 | 9 | Kmt2b         |
| 0.327787416  | 1 | 0.0032314 | 9 | Capg          |
| -1.306553832 | 1 | 0.0032327 | 9 | Atxn1         |
| 0.638782139  | 1 | 0.0032416 | 9 | Eif2a         |
| -0.402667301 | 1 | 0.0032548 | 9 | Mir692-1      |
| 0.287790224  | 1 | 0.0032615 | 9 | Prdx5         |
| 0.659890582  | 1 | 0.0033426 | 9 | Dld           |



|              |   |           |   |               |
|--------------|---|-----------|---|---------------|
| 0.431640099  | 1 | 0.003345  | 9 | S100a6        |
| -1.56575076  | 1 | 0.0033691 | 9 | Bank1         |
| 0.687776382  | 1 | 0.0033731 | 9 | Oma1          |
| -1.239970803 | 1 | 0.0033823 | 9 | Vegfb         |
| -1.449718152 | 1 | 0.0034561 | 9 | Dram2         |
| 0.296451796  | 1 | 0.0034624 | 9 | Aldoa         |
| 0.858808907  | 1 | 0.0034846 | 9 | Ppfibp2       |
| -1.372202548 | 1 | 0.003502  | 9 | Ncln          |
| -1.265897614 | 1 | 0.0035174 | 9 | Rp9           |
| -1.242049465 | 1 | 0.003538  | 9 | Tesk1         |
| -1.323658277 | 1 | 0.0035516 | 9 | Calu          |
| -1.251380416 | 1 | 0.0036129 | 9 | Gigyf1        |
| -1.4061041   | 1 | 0.003636  | 9 | Zdhhc4        |
| 0.282430466  | 1 | 0.0036409 | 9 | Tyms          |
| -0.375235068 | 1 | 0.0036604 | 9 | Lamp1         |
| 0.261919269  | 1 | 0.0036775 | 9 | Cryz1         |
| -1.160790677 | 1 | 0.0036797 | 9 | Hnrnpa0       |
| 0.30067004   | 1 | 0.0036818 | 9 | C2cd2l        |
| -1.379988252 | 1 | 0.0036961 | 9 | Sav1          |
| -1.333166952 | 1 | 0.0036983 | 9 | Dcp2          |
| 0.307477134  | 1 | 0.0036991 | 9 | Hn1           |
| 0.294209396  | 1 | 0.00372   | 9 | Tiam1         |
| -1.202805893 | 1 | 0.0037252 | 9 | Bcl7b         |
| -1.436593696 | 1 | 0.0037375 | 9 | Ythdf3        |
| -1.034381691 | 1 | 0.0037439 | 9 | Rhob          |
| 0.254627107  | 1 | 0.0037459 | 9 | Ddx41         |
| 0.96120418   | 1 | 0.0037576 | 9 | BC018507      |
| -1.079711027 | 1 | 0.0038231 | 9 | Neat1         |
| -1.365082961 | 1 | 0.0038415 | 9 | Abhd4         |
| -0.735747091 | 1 | 0.0038672 | 9 | Tmbim6        |
| -1.32246273  | 1 | 0.003947  | 9 | Abl2          |
| 0.410334514  | 1 | 0.0039497 | 9 | Ndufb3        |
| -1.40236378  | 1 | 0.0039519 | 9 | Prorsd1       |
| 0.366579223  | 1 | 0.0039873 | 9 | Tmx2          |
| -1.300331977 | 1 | 0.0039986 | 9 | Hadha         |
| 0.277721896  | 1 | 0.0040147 | 9 | Angel2        |
| -1.435714269 | 1 | 0.0040224 | 9 | Wars          |
| -1.419115381 | 1 | 0.0040365 | 9 | 2310045N01Rik |
| -1.318009308 | 1 | 0.0040382 | 9 | Rnf2          |
| 0.570754419  | 1 | 0.0040634 | 9 | Ssna1         |
| -1.43756175  | 1 | 0.0040927 | 9 | Cd69          |
| -1.373152288 | 1 | 0.0041232 | 9 | Usp22         |
| 0.292155345  | 1 | 0.0041462 | 9 | Tubb6         |
| -1.304290433 | 1 | 0.0041855 | 9 | Upf2          |
| -1.400497011 | 1 | 0.0041876 | 9 | Arhgap31      |
| 0.625671482  | 1 | 0.0042005 | 9 | Slc12a6       |
| -1.28530577  | 1 | 0.0042492 | 9 | Strn4         |
| 0.352792867  | 1 | 0.0043037 | 9 | Cd72          |
| -1.292091724 | 1 | 0.0043951 | 9 | Slc30a1       |
| -1.31021301  | 1 | 0.004405  | 9 | Evi5          |
| 0.285340675  | 1 | 0.0044242 | 9 | Vps13d        |
| -0.770371359 | 1 | 0.0044517 | 9 | Eno1b         |
| -1.47004184  | 1 | 0.0044574 | 9 | Lpcat3        |
| -1.442911208 | 1 | 0.0045272 | 9 | H1f0          |
| 0.477695273  | 1 | 0.0045361 | 9 | Mdn1          |
| -1.420552592 | 1 | 0.0045379 | 9 | Arl2          |
| -1.329260125 | 1 | 0.0045746 | 9 | Qars          |
| -1.40943189  | 1 | 0.0046123 | 9 | Myo7a         |
| -1.38324016  | 1 | 0.0046161 | 9 | Ncoa2         |
| 0.251520935  | 1 | 0.0046593 | 9 | Ghitm         |
| -1.490643287 | 1 | 0.0047078 | 9 | Map2k2        |

|              |   |           |   |               |
|--------------|---|-----------|---|---------------|
| -0.488802756 | 1 | 0.0047142 | 9 | Sdcbp         |
| -1.318747751 | 1 | 0.0047144 | 9 | 2210016F16Rik |
| -1.25299162  | 1 | 0.004742  | 9 | Crkl          |
| -1.220830822 | 1 | 0.00475   | 9 | Gmfg          |
| -1.403773343 | 1 | 0.0048175 | 9 | Bscl2         |
| -1.352664253 | 1 | 0.004862  | 9 | Csnk1g3       |
| 0.519540505  | 1 | 0.0048853 | 9 | Syng1         |
| 0.256578327  | 1 | 0.0049102 | 9 | St13          |
| 0.28215088   | 1 | 0.0049492 | 9 | Pfkfb3        |
| -1.288833753 | 1 | 0.0049596 | 9 | Mbd6          |
| -1.225685493 | 1 | 0.0049664 | 9 | Brox          |
| 0.322204396  | 1 | 0.0049766 | 9 | Cdc14a        |
| -1.232207855 | 1 | 0.004993  | 9 | Dhx30         |
| -1.332110081 | 1 | 0.0050005 | 9 | Rnf150        |
| -1.3381028   | 1 | 0.0050049 | 9 | Cyp4v3        |
| 0.284589778  | 1 | 0.0050962 | 9 | Kpna1         |
| -1.47169312  | 1 | 0.0051172 | 9 | Mdp1          |
| 0.308377823  | 1 | 0.0051591 | 9 | Fam53b        |
| -0.320035037 | 1 | 0.0051628 | 9 | Map3k11       |
| -1.21857603  | 1 | 0.0051964 | 9 | Akap8l        |
| -1.40985773  | 1 | 0.005207  | 9 | Slc39a11      |
| -1.460082003 | 1 | 0.0052497 | 9 | B4galt6       |
| -1.257597481 | 1 | 0.0052743 | 9 | Ints12        |
| 0.262031481  | 1 | 0.0052905 | 9 | Psma2         |
| -1.234612575 | 1 | 0.0053241 | 9 | Snx13         |
| -1.612567805 | 1 | 0.0053419 | 9 | Lyl1          |
| -1.537955069 | 1 | 0.0053514 | 9 | Nkg7          |
| 0.481054156  | 1 | 0.0053705 | 9 | Mrps17        |
| 0.262782429  | 1 | 0.0053915 | 9 | Camk1         |
| 0.260142841  | 1 | 0.0054121 | 9 | Gfpt1         |
| -1.509685255 | 1 | 0.0054154 | 9 | 9030624J02Rik |
| 0.286557561  | 1 | 0.0054242 | 9 | Ttc1          |
| -1.652350424 | 1 | 0.0054493 | 9 | Mrc1          |
| -1.252570513 | 1 | 0.0054641 | 9 | Trpm7         |
| -0.26238811  | 1 | 0.0054668 | 9 | Ctsb          |
| -0.8696659   | 1 | 0.0054714 | 9 | Ubxn6         |
| 0.774889283  | 1 | 0.0055002 | 9 | Tap1          |
| 0.382853426  | 1 | 0.0055342 | 9 | Vps29         |
| -1.413743689 | 1 | 0.0055478 | 9 | Denr          |
| -1.27598725  | 1 | 0.0055793 | 9 | Uba7          |
| 0.253509271  | 1 | 0.005595  | 9 | Lclat1        |
| -1.316669059 | 1 | 0.0056584 | 9 | Hpgds         |
| 0.256074422  | 1 | 0.0057079 | 9 | Uvssa         |
| -1.368534697 | 1 | 0.0057433 | 9 | Pom121        |
| -1.375568524 | 1 | 0.0057692 | 9 | N4bp2l2       |
| -1.245877385 | 1 | 0.0058941 | 9 | Parp4         |
| 0.253156768  | 1 | 0.005895  | 9 | Rchy1         |
| -1.281434662 | 1 | 0.0059089 | 9 | Tm2d3         |
| -1.527492345 | 1 | 0.0059241 | 9 | Mndal         |
| 1.49234167   | 1 | 0.0060277 | 9 | Tacc3         |
| -1.141521079 | 1 | 0.0061361 | 9 | Cxcr4         |
| -0.358455255 | 1 | 0.0061504 | 9 | NP-904329.1   |
| 1.145394533  | 1 | 0.0062099 | 9 | Il6st         |
| -1.312230473 | 1 | 0.0062263 | 9 | Mnt           |
| -1.346267391 | 1 | 0.0062372 | 9 | Echs1         |
| 0.486933755  | 1 | 0.0062475 | 9 | B4galt5       |
| 0.60676226   | 1 | 0.0062878 | 9 | D16Ertd472e   |
| 0.677395046  | 1 | 0.0063521 | 9 | Pvrl1         |
| 0.715188773  | 1 | 0.006354  | 9 | Dohh          |
| -1.272572707 | 1 | 0.0063561 | 9 | Gxylt1        |
| 0.32924037   | 1 | 0.0063563 | 9 | Nab2          |

|              |   |           |   |               |
|--------------|---|-----------|---|---------------|
| 0.340409505  | 1 | 0.0063691 | 9 | Eif6          |
| -1.113229124 | 1 | 0.0064283 | 9 | Plekho1       |
| 0.2611176    | 1 | 0.0064742 | 9 | Zkscan1       |
| -1.060659123 | 1 | 0.0064786 | 9 | Ewsr1         |
| -1.304353471 | 1 | 0.0064794 | 9 | Adnp          |
| -1.412266427 | 1 | 0.0065763 | 9 | Gdf3          |
| 0.338055364  | 1 | 0.0066171 | 9 | Fkbp4         |
| -0.910301932 | 1 | 0.0066479 | 9 | Uqcrb         |
| -1.226934658 | 1 | 0.0066857 | 9 | Cyth3         |
| -1.46812623  | 1 | 0.0067623 | 9 | Tial1         |
| -1.37972753  | 1 | 0.0068124 | 9 | Egr2          |
| 0.472751317  | 1 | 0.0068137 | 9 | Phf12         |
| -1.251624147 | 1 | 0.0068287 | 9 | Bad           |
| 0.264836013  | 1 | 0.0068855 | 9 | Clic4         |
| -1.466068684 | 1 | 0.0069328 | 9 | Pcnt          |
| -1.269993211 | 1 | 0.0069332 | 9 | Ap5s1         |
| -1.398977874 | 1 | 0.0069486 | 9 | Zcchc17       |
| 0.377755411  | 1 | 0.0069533 | 9 | Cd209a        |
| 0.66036425   | 1 | 0.0069605 | 9 | Elk3          |
| -0.938388528 | 1 | 0.0069829 | 9 | Gltp          |
| -1.27341891  | 1 | 0.006989  | 9 | Mfhas1        |
| -1.357730515 | 1 | 0.0070187 | 9 | Mepce         |
| 0.348734883  | 1 | 0.0070959 | 9 | 0610037L13Rik |
| 0.26291485   | 1 | 0.0071007 | 9 | Rnaseh2b      |
| -1.309989363 | 1 | 0.007207  | 9 | Hbs1l         |
| 0.622709033  | 1 | 0.0072332 | 9 | Nip7          |
| -1.299684823 | 1 | 0.0072594 | 9 | Agpat2        |
| -0.944323729 | 1 | 0.0072778 | 9 | Psmb2         |
| 0.281656777  | 1 | 0.0072892 | 9 | Fkbp1a        |
| -1.363836353 | 1 | 0.0073535 | 9 | Setd8         |
| -1.294551614 | 1 | 0.0073667 | 9 | Zfp800        |
| 0.503343172  | 1 | 0.0074368 | 9 | Stk4          |
| -0.425662101 | 1 | 0.0074407 | 9 | Pfn1          |
| -1.147013483 | 1 | 0.0074594 | 9 | Kansl1        |
| -1.277670945 | 1 | 0.0075004 | 9 | Fli1          |
| -1.303474486 | 1 | 0.0075671 | 9 | Oas1a         |
| -1.087544543 | 1 | 0.0076793 | 9 | Arfgef1       |
| -1.168218267 | 1 | 0.0076911 | 9 | Dync1li2      |
| -1.371435971 | 1 | 0.0077718 | 9 | Dnpep         |
| -1.468931756 | 1 | 0.0077735 | 9 | Fgd4          |
| 0.351170597  | 1 | 0.0077761 | 9 | Tmem131       |
| 0.344072386  | 1 | 0.0078496 | 9 | Ptpn6         |
| -1.339149965 | 1 | 0.0078508 | 9 | Arhgef12      |
| -1.107826409 | 1 | 0.0079651 | 9 | Fh1           |
| -1.315387342 | 1 | 0.0079901 | 9 | Cul4b         |
| -0.979083547 | 1 | 0.0079973 | 9 | Ccl3          |
| -1.116700666 | 1 | 0.00804   | 9 | Plxnd1        |
| -1.290846608 | 1 | 0.0080439 | 9 | Tmem141       |
| -1.369954018 | 1 | 0.0081405 | 9 | Slc16a3       |
| -0.847968697 | 1 | 0.0081888 | 9 | Gm6402        |
| 0.250303623  | 1 | 0.0081935 | 9 | 2410006H16Rik |
| -1.26435807  | 1 | 0.0083109 | 9 | Hscb          |
| -1.287631171 | 1 | 0.0083603 | 9 | Fmnl2         |
| 0.303682797  | 1 | 0.0083966 | 9 | Kif1c         |
| -1.375823061 | 1 | 0.0084584 | 9 | Fam168b       |
| -1.11930194  | 1 | 0.008462  | 9 | Pnpla8        |
| -1.554148405 | 1 | 0.0084715 | 9 | Cyb5r1        |
| 0.766336145  | 1 | 0.0085649 | 9 | Dnajc14       |
| 0.930009645  | 1 | 0.008593  | 9 | Upf3b         |
| -1.389874341 | 1 | 0.0087191 | 9 | Il18bp        |
| 0.548720168  | 1 | 0.0087317 | 9 | Utp14b        |

|              |           |           |    |               |
|--------------|-----------|-----------|----|---------------|
| -1.237528897 | 1         | 0.0087366 | 9  | Gtf2a1        |
| 0.258905413  | 1         | 0.008771  | 9  | Dlg1          |
| -1.121329673 | 1         | 0.0087734 | 9  | Gnai3         |
| -1.058158892 | 1         | 0.0088539 | 9  | Midn          |
| -1.15445348  | 1         | 0.0088712 | 9  | Hars          |
| -1.42629769  | 1         | 0.0089111 | 9  | Rtfdc1        |
| -1.368446928 | 1         | 0.0089841 | 9  | Asxl1         |
| -1.036816141 | 1         | 0.009067  | 9  | Amdhd2        |
| 0.444970907  | 1         | 0.0090716 | 9  | Cacna1d       |
| -1.196943734 | 1         | 0.0090878 | 9  | Matr3         |
| -1.389027911 | 1         | 0.0090934 | 9  | Cebpd         |
| 0.294140261  | 1         | 0.0091206 | 9  | Pnlsr         |
| 0.318471344  | 1         | 0.0091349 | 9  | Sord          |
| -0.601458141 | 1         | 0.0091393 | 9  | Snx5          |
| -1.407146081 | 1         | 0.0091514 | 9  | Ncbp2         |
| 0.565916971  | 1         | 0.0091528 | 9  | Ogdh          |
| -1.296206558 | 1         | 0.0092159 | 9  | Trim26        |
| 0.353468474  | 1         | 0.0092312 | 9  | Abcf1         |
| -0.773804122 | 1         | 0.0092465 | 9  | Atp6v1f       |
| -1.357241861 | 1         | 0.0092909 | 9  | Sema4a        |
| -1.197469399 | 1         | 0.0093206 | 9  | Apaf1         |
| -1.080144314 | 1         | 0.0093242 | 9  | Lman1         |
| -0.51663776  | 1         | 0.0094128 | 9  | Pltp          |
| 0.281045945  | 1         | 0.0094716 | 9  | Vti1b         |
| 0.621248468  | 1         | 0.0094904 | 9  | Aco2          |
| -1.163350095 | 1         | 0.0095135 | 9  | Scamp1        |
| -1.009769756 | 1         | 0.0095691 | 9  | Mrfap1        |
| -1.267798177 | 1         | 0.0095972 | 9  | Sod2          |
| -1.331732806 | 1         | 0.0096301 | 9  | Sos2          |
| 0.395858845  | 1         | 0.0096463 | 9  | Dek           |
| -1.561589411 | 1         | 0.0096592 | 9  | Mfap3         |
| -1.167318566 | 1         | 0.0097023 | 9  | Glb1          |
| -1.253404799 | 1         | 0.0097167 | 9  | Map4k3        |
| 0.319413754  | 1         | 0.0098617 | 9  | Srp2          |
| -1.224732283 | 1         | 0.0098685 | 9  | Mroh1         |
| -1.197458123 | 1         | 0.0099842 | 9  | Dnajb14       |
| -1.067341835 | 1         | 0.0099901 | 9  | Gak           |
| -1.192992365 | 1         | 0.0099964 | 9  | Sqrdl         |
| 1.868000817  | 8.17E-133 | 6.12E-137 | 10 | Arhgap33      |
| 2.028809907  | 5.48E-131 | 4.10E-135 | 10 | Neil3         |
| 1.102356884  | 1.65E-118 | 1.23E-122 | 10 | Prodh         |
| 1.355375182  | 1.87E-104 | 1.40E-108 | 10 | Zbtb32        |
| 2.048864859  | 1.41E-103 | 1.06E-107 | 10 | Mss51         |
| 1.686898798  | 1.19E-101 | 8.91E-106 | 10 | Shcbp1        |
| 1.721788615  | 8.90E-87  | 6.67E-91  | 10 | 1110046J04Rik |
| 2.234875095  | 2.06E-86  | 1.55E-90  | 10 | S1pr3         |
| 2.377454483  | 1.17E-84  | 8.79E-89  | 10 | Sgol1         |
| 2.461355866  | 3.53E-83  | 2.64E-87  | 10 | Lrrc32        |
| 1.243054638  | 5.22E-81  | 3.91E-85  | 10 | Mex3a         |
| 1.391602542  | 2.39E-80  | 1.79E-84  | 10 | Zwilch        |
| 1.204946989  | 4.93E-79  | 3.69E-83  | 10 | Zfat          |
| 2.07736589   | 3.93E-78  | 2.94E-82  | 10 | Ccnb1         |
| 0.925506933  | 1.05E-77  | 7.83E-82  | 10 | Ccdc176       |
| 1.653562717  | 2.81E-77  | 2.11E-81  | 10 | Mtx3          |
| 2.095016753  | 4.41E-76  | 3.30E-80  | 10 | Ccdc61        |
| 1.647201355  | 1.25E-75  | 9.39E-80  | 10 | Spag5         |
| 1.322218225  | 1.83E-74  | 1.37E-78  | 10 | Fam185a       |
| 1.128694557  | 3.77E-71  | 2.82E-75  | 10 | Sapcd2        |
| 0.792269563  | 5.48E-71  | 4.10E-75  | 10 | Olf110        |
| 1.765406891  | 1.23E-70  | 9.22E-75  | 10 | Pigg          |
| 1.335128447  | 1.53E-68  | 1.15E-72  | 10 | Mak           |

|             |          |          |    |               |
|-------------|----------|----------|----|---------------|
| 1.504207343 | 4.57E-67 | 3.42E-71 | 10 | Cox6b2        |
| 0.594695089 | 1.21E-66 | 9.08E-71 | 10 | Spta1         |
| 1.045892128 | 2.15E-65 | 1.61E-69 | 10 | Slc9a5        |
| 2.586746691 | 3.68E-63 | 2.75E-67 | 10 | Pemt          |
| 0.869708281 | 6.61E-63 | 4.95E-67 | 10 | Hist1h2bj     |
| 1.106011389 | 1.15E-62 | 8.65E-67 | 10 | 3110057012Rik |
| 2.131883601 | 4.15E-62 | 3.11E-66 | 10 | Bard1         |
| 2.008442361 | 7.72E-62 | 5.78E-66 | 10 | Pbk           |
| 1.752094471 | 1.14E-61 | 8.52E-66 | 10 | Fanca         |
| 1.919629263 | 5.31E-61 | 3.98E-65 | 10 | Ocstamp       |
| 1.346358643 | 2.84E-60 | 2.13E-64 | 10 | D130040H23Rik |
| 2.377573983 | 1.50E-59 | 1.12E-63 | 10 | Htra4         |
| 1.425822814 | 1.79E-59 | 1.34E-63 | 10 | Il23a         |
| 1.298001754 | 1.90E-59 | 1.42E-63 | 10 | Stag3         |
| 1.27410765  | 3.99E-59 | 2.99E-63 | 10 | Rasl12        |
| 1.09798062  | 2.95E-58 | 2.21E-62 | 10 | Figl1         |
| 1.471110348 | 5.82E-58 | 4.36E-62 | 10 | Mfsd12        |
| 0.917296482 | 9.10E-57 | 6.82E-61 | 10 | Gm3336        |
| 2.363100905 | 1.34E-56 | 1.01E-60 | 10 | D630041G03Rik |
| 1.643924089 | 2.52E-56 | 1.89E-60 | 10 | Nuf2          |
| 1.037097682 | 4.08E-56 | 3.06E-60 | 10 | Hist1h1a      |
| 2.634435998 | 9.31E-56 | 6.97E-60 | 10 | 8030462N17Rik |
| 1.264559391 | 1.39E-55 | 1.04E-59 | 10 | Zfp606        |
| 2.465603828 | 6.81E-55 | 5.10E-59 | 10 | Foxm1         |
| 1.332750055 | 5.42E-54 | 4.06E-58 | 10 | F9            |
| 1.459093861 | 2.33E-53 | 1.75E-57 | 10 | Mxd3          |
| 2.819404875 | 1.46E-52 | 1.09E-56 | 10 | Myh11         |
| 2.391720741 | 1.76E-52 | 1.32E-56 | 10 | Slamf6        |
| 0.791309409 | 2.84E-51 | 2.13E-55 | 10 | Ano1          |
| 0.689308404 | 4.06E-51 | 3.04E-55 | 10 | Ctnna3        |
| 1.001365016 | 4.57E-51 | 3.42E-55 | 10 | Kcnmb1        |
| 0.657593477 | 7.14E-51 | 5.35E-55 | 10 | Tube1         |
| 1.234894715 | 8.16E-50 | 6.11E-54 | 10 | Rps6ka2       |
| 1.632213396 | 7.16E-49 | 5.36E-53 | 10 | Mast4         |
| 1.549777389 | 1.74E-48 | 1.30E-52 | 10 | Mmachc        |
| 1.705478977 | 1.02E-47 | 7.64E-52 | 10 | Entpd2        |
| 1.787850608 | 1.81E-47 | 1.35E-51 | 10 | Tcaim         |
| 1.201396389 | 2.06E-47 | 1.54E-51 | 10 | Ankrd55       |
| 0.520335847 | 2.37E-47 | 1.77E-51 | 10 | Ldb3          |
| 0.436767256 | 3.68E-47 | 2.75E-51 | 10 | Ankrd2        |
| 0.951467907 | 1.03E-45 | 7.69E-50 | 10 | Upp1          |
| 0.997031228 | 1.12E-45 | 8.39E-50 | 10 | Ccdc138       |
| 1.965034161 | 1.85E-45 | 1.38E-49 | 10 | Ccdc3         |
| 0.856470858 | 4.86E-45 | 3.64E-49 | 10 | Synpo2        |
| 1.929144431 | 5.44E-45 | 4.07E-49 | 10 | Kif4          |
| 0.687083313 | 5.59E-45 | 4.19E-49 | 10 | Jph2          |
| 2.042606016 | 5.59E-45 | 4.19E-49 | 10 | Cnn1          |
| 0.835656483 | 6.00E-45 | 4.49E-49 | 10 | Slc6a4        |
| 1.39004167  | 2.63E-44 | 1.97E-48 | 10 | Mboat1        |
| 1.592799907 | 2.89E-44 | 2.17E-48 | 10 | Poc1a         |
| 2.105683021 | 3.91E-43 | 2.93E-47 | 10 | Dmpk          |
| 1.822146079 | 5.07E-43 | 3.80E-47 | 10 | Dmkn          |
| 1.659962272 | 6.33E-43 | 4.74E-47 | 10 | Dlgap5        |
| 1.474418065 | 1.58E-42 | 1.18E-46 | 10 | Lin52         |
| 1.455638687 | 1.89E-42 | 1.41E-46 | 10 | Chchd6        |
| 1.991450791 | 6.10E-42 | 4.57E-46 | 10 | Iqgap3        |
| 2.778122399 | 2.51E-41 | 1.88E-45 | 10 | Tagln         |
| 1.118534703 | 2.56E-41 | 1.92E-45 | 10 | Adc           |
| 2.133033688 | 3.62E-41 | 2.71E-45 | 10 | Spc25         |
| 1.456853754 | 3.82E-40 | 2.86E-44 | 10 | Fbxw17        |
| 0.384885068 | 6.24E-40 | 4.68E-44 | 10 | Sost          |

|             |          |          |    |               |
|-------------|----------|----------|----|---------------|
| 0.912386223 | 7.36E-40 | 5.51E-44 | 10 | Hlf           |
| 1.236667241 | 8.38E-40 | 6.28E-44 | 10 | Olfr920       |
| 0.522696504 | 1.14E-39 | 8.57E-44 | 10 | Zfp27         |
| 1.657706282 | 3.13E-39 | 2.34E-43 | 10 | Cenpo         |
| 1.659066935 | 6.45E-39 | 4.83E-43 | 10 | Hinfp         |
| 1.399847328 | 6.69E-39 | 5.01E-43 | 10 | Cacna1f       |
| 1.207475435 | 1.20E-38 | 9.02E-43 | 10 | Arhgef17      |
| 1.542160459 | 1.45E-38 | 1.08E-42 | 10 | Kif15         |
| 1.827905549 | 2.13E-38 | 1.60E-42 | 10 | Mis18bp1      |
| 1.691595325 | 5.13E-38 | 3.84E-42 | 10 | Mtrf1         |
| 1.685245773 | 6.55E-38 | 4.91E-42 | 10 | Thop1         |
| 1.232957622 | 7.66E-38 | 5.74E-42 | 10 | D830031N03Rik |
| 1.673941784 | 9.14E-38 | 6.85E-42 | 10 | Recql5        |
| 1.99236493  | 1.17E-37 | 8.74E-42 | 10 | Thtpa         |
| 1.252992146 | 1.25E-37 | 9.39E-42 | 10 | Snapc3        |
| 1.95313398  | 1.85E-37 | 1.39E-41 | 10 | Sgsm3         |
| 1.967575086 | 3.21E-37 | 2.40E-41 | 10 | Rtel1         |
| 1.953991146 | 3.64E-37 | 2.73E-41 | 10 | Rrp12         |
| 2.434855238 | 3.68E-37 | 2.75E-41 | 10 | Slc43a3       |
| 2.412353041 | 4.18E-37 | 3.13E-41 | 10 | Usp6nl        |
| 1.701039468 | 5.13E-37 | 3.84E-41 | 10 | Fam222b       |
| 1.637801745 | 6.02E-37 | 4.51E-41 | 10 | Dhdh          |
| 0.614032458 | 8.79E-37 | 6.59E-41 | 10 | Flnc          |
| 1.002402678 | 2.60E-36 | 1.95E-40 | 10 | Aurkb         |
| 0.894799681 | 2.78E-36 | 2.08E-40 | 10 | Prr11         |
| 1.202008922 | 3.06E-36 | 2.29E-40 | 10 | Cenpn         |
| 1.396677753 | 6.47E-36 | 4.85E-40 | 10 | Tmem144       |
| 1.228129557 | 9.60E-36 | 7.19E-40 | 10 | Ebag9         |
| 0.917075969 | 1.11E-35 | 8.34E-40 | 10 | Lmln          |
| 1.307668549 | 1.54E-35 | 1.15E-39 | 10 | Brca2         |
| 1.739702185 | 2.49E-35 | 1.86E-39 | 10 | Rbms3         |
| 0.550683795 | 2.97E-35 | 2.22E-39 | 10 | Lrfn4         |
| 1.045419576 | 3.72E-35 | 2.79E-39 | 10 | Fam64a        |
| 1.619210156 | 4.69E-35 | 3.51E-39 | 10 | Stil          |
| 1.210495865 | 7.19E-35 | 5.39E-39 | 10 | Map1b         |
| 0.608028619 | 1.37E-34 | 1.02E-38 | 10 | Slc2a10       |
| 1.525564051 | 1.62E-34 | 1.21E-38 | 10 | 5830415F09Rik |
| 0.961831374 | 1.67E-34 | 1.25E-38 | 10 | Sgca          |
| 0.810431429 | 1.89E-34 | 1.41E-38 | 10 | Rab11fip3     |
| 1.095097347 | 2.86E-34 | 2.14E-38 | 10 | 4632434111Rik |
| 0.937811868 | 3.20E-34 | 2.39E-38 | 10 | Sacs          |
| 1.453771421 | 8.40E-34 | 6.29E-38 | 10 | Ckap2         |
| 1.08889757  | 2.97E-33 | 2.23E-37 | 10 | Itga7         |
| 0.509402136 | 4.19E-33 | 3.14E-37 | 10 | Gen1          |
| 0.755231947 | 7.12E-33 | 5.33E-37 | 10 | Ska3          |
| 1.013973229 | 7.43E-33 | 5.57E-37 | 10 | Pif1          |
| 1.051925175 | 9.00E-33 | 6.74E-37 | 10 | Qtrtd1        |
| 1.585773256 | 1.25E-32 | 9.38E-37 | 10 | Crispld2      |
| 1.750603572 | 1.60E-32 | 1.20E-36 | 10 | Cd80          |
| 1.996458342 | 4.48E-32 | 3.35E-36 | 10 | Usp11         |
| 1.39955574  | 1.33E-31 | 9.93E-36 | 10 | Ncaph         |
| 1.112165255 | 3.24E-31 | 2.42E-35 | 10 | Dtl           |
| 1.194441602 | 3.39E-31 | 2.54E-35 | 10 | Snx33         |
| 1.136016471 | 3.82E-31 | 2.86E-35 | 10 | Dmd           |
| 0.717124664 | 4.43E-31 | 3.32E-35 | 10 | Zfp553        |
| 1.307031291 | 6.58E-31 | 4.93E-35 | 10 | 2610020H08Rik |
| 1.802988204 | 9.10E-31 | 6.81E-35 | 10 | Ttc12         |
| 0.991580312 | 9.50E-31 | 7.12E-35 | 10 | Cdc45         |
| 1.025637688 | 1.12E-30 | 8.38E-35 | 10 | Cep55         |
| 1.552906066 | 1.35E-30 | 1.01E-34 | 10 | Crtam         |
| 1.934120941 | 2.48E-30 | 1.86E-34 | 10 | Cdkn3         |

|             |          |          |    |               |
|-------------|----------|----------|----|---------------|
| 0.85052866  | 5.80E-30 | 4.34E-34 | 10 | Nexn          |
| 0.906902129 | 6.25E-30 | 4.68E-34 | 10 | Pex12         |
| 1.691239979 | 7.11E-30 | 5.33E-34 | 10 | Tbck          |
| 1.499699972 | 7.20E-30 | 5.39E-34 | 10 | Msh3          |
| 1.11140451  | 8.81E-30 | 6.60E-34 | 10 | Gpr97         |
| 1.490025097 | 9.43E-30 | 7.06E-34 | 10 | Pdcd1lg2      |
| 0.991333639 | 9.90E-30 | 7.42E-34 | 10 | 2810442I21Rik |
| 1.230567294 | 1.85E-29 | 1.39E-33 | 10 | Tk1           |
| 1.385196063 | 2.02E-29 | 1.51E-33 | 10 | Spc24         |
| 2.070195593 | 5.06E-29 | 3.79E-33 | 10 | Myl9          |
| 0.636966809 | 5.57E-29 | 4.17E-33 | 10 | Nek2          |
| 1.686158598 | 5.99E-29 | 4.49E-33 | 10 | Slfn10-ps     |
| 1.881767276 | 7.92E-29 | 5.93E-33 | 10 | Eftud1        |
| 2.297310566 | 9.55E-29 | 7.15E-33 | 10 | Ube2c         |
| 2.124640353 | 9.88E-29 | 7.40E-33 | 10 | Dhx33         |
| 2.167990269 | 1.04E-28 | 7.77E-33 | 10 | Pvt1          |
| 1.609968773 | 1.11E-28 | 8.31E-33 | 10 | Dis3          |
| 1.290291421 | 1.16E-28 | 8.70E-33 | 10 | Nxn           |
| 0.81756274  | 1.91E-28 | 1.43E-32 | 10 | N4bp3         |
| 1.761020953 | 2.84E-28 | 2.13E-32 | 10 | Rps6kb2       |
| 1.829149858 | 3.53E-28 | 2.64E-32 | 10 | Rdh11         |
| 1.614857493 | 4.27E-28 | 3.20E-32 | 10 | 1190002F15Rik |
| 1.523648436 | 4.43E-28 | 3.32E-32 | 10 | B4galt7       |
| 1.05915122  | 5.93E-28 | 4.44E-32 | 10 | Ltb4r1        |
| 1.687015129 | 6.93E-28 | 5.19E-32 | 10 | Isg20l2       |
| 2.898085947 | 1.30E-27 | 9.72E-32 | 10 | Cdca3         |
| 2.135321499 | 1.67E-27 | 1.25E-31 | 10 | Vdr           |
| 1.264633849 | 1.79E-27 | 1.34E-31 | 10 | Hspb6         |
| 0.962517059 | 2.18E-27 | 1.63E-31 | 10 | Serpinb12     |
| 0.636966809 | 3.06E-27 | 2.29E-31 | 10 | Ubash3a       |
| 1.349391522 | 3.11E-27 | 2.33E-31 | 10 | Impa2         |
| 1.024010741 | 3.26E-27 | 2.45E-31 | 10 | AW554918      |
| 1.459288326 | 5.42E-27 | 4.06E-31 | 10 | 5330426P16Rik |
| 1.533875789 | 6.85E-27 | 5.13E-31 | 10 | Tmem80        |
| 1.421627217 | 7.85E-27 | 5.88E-31 | 10 | MIh1          |
| 2.785026417 | 8.10E-27 | 6.07E-31 | 10 | Tex2          |
| 1.064023179 | 8.31E-27 | 6.22E-31 | 10 | Zfp874b       |
| 0.898214152 | 8.77E-27 | 6.57E-31 | 10 | Piga          |
| 0.511727473 | 8.97E-27 | 6.72E-31 | 10 | Myrf          |
| 1.246103731 | 9.33E-27 | 6.99E-31 | 10 | Pus7l         |
| 1.63705949  | 9.49E-27 | 7.10E-31 | 10 | Ccnb2         |
| 1.179905778 | 1.22E-26 | 9.11E-31 | 10 | Zfyve1        |
| 2.121252763 | 2.24E-26 | 1.68E-30 | 10 | Satb1         |
| 1.18524495  | 4.05E-26 | 3.03E-30 | 10 | Hook2         |
| 1.473228577 | 4.29E-26 | 3.21E-30 | 10 | Fam206a       |
| 1.37600367  | 4.32E-26 | 3.24E-30 | 10 | MIkl          |
| 1.187589017 | 5.00E-26 | 3.74E-30 | 10 | Zfp1          |
| 1.385503621 | 5.37E-26 | 4.02E-30 | 10 | Elac2         |
| 1.239865727 | 1.31E-25 | 9.78E-30 | 10 | Trub2         |
| 0.775172727 | 2.08E-25 | 1.56E-29 | 10 | Med26         |
| 1.857137503 | 2.59E-25 | 1.94E-29 | 10 | Cald1         |
| 1.736717114 | 2.69E-25 | 2.02E-29 | 10 | Vwa8          |
| 1.758115143 | 2.75E-25 | 2.06E-29 | 10 | E2f5          |
| 0.828112951 | 2.92E-25 | 2.19E-29 | 10 | Pcdh7         |
| 1.971708597 | 5.10E-25 | 3.82E-29 | 10 | Cd209d        |
| 0.4851291   | 6.61E-25 | 4.95E-29 | 10 | 2310034O05Rik |
| 1.583449518 | 8.57E-25 | 6.42E-29 | 10 | Cdca8         |
| 1.055241705 | 1.06E-24 | 7.96E-29 | 10 | Ccdc77        |
| 1.027007447 | 1.12E-24 | 8.39E-29 | 10 | Pcyt2         |
| 1.102503344 | 2.43E-24 | 1.82E-28 | 10 | Kif20b        |
| 1.63785779  | 3.32E-24 | 2.49E-28 | 10 | Dph5          |

|             |          |          |    |               |
|-------------|----------|----------|----|---------------|
| 1.632635846 | 3.68E-24 | 2.76E-28 | 10 | AU022793      |
| 0.912422634 | 5.64E-24 | 4.22E-28 | 10 | Pacsin3       |
| 0.52088121  | 6.51E-24 | 4.88E-28 | 10 | Mars2         |
| 0.647307694 | 8.49E-24 | 6.36E-28 | 10 | Gstcd         |
| 1.055367657 | 9.76E-24 | 7.31E-28 | 10 | Xylt1         |
| 0.751301565 | 1.04E-23 | 7.79E-28 | 10 | Mastl         |
| 0.396699552 | 1.07E-23 | 8.04E-28 | 10 | Kcnma1        |
| 0.386970091 | 1.39E-23 | 1.04E-27 | 10 | Pacrg         |
| 1.177264157 | 1.85E-23 | 1.38E-27 | 10 | 5730455P16Rik |
| 1.41605057  | 2.59E-23 | 1.94E-27 | 10 | Rybp          |
| 2.126966579 | 3.18E-23 | 2.38E-27 | 10 | 9430016H08Rik |
| 0.535066504 | 3.98E-23 | 2.98E-27 | 10 | 2310034G01Rik |
| 1.02133284  | 4.27E-23 | 3.19E-27 | 10 | Cdyl2         |
| 1.321155059 | 4.54E-23 | 3.40E-27 | 10 | Abcc9         |
| 1.193134318 | 4.66E-23 | 3.49E-27 | 10 | Rnf24         |
| 0.428923604 | 5.13E-23 | 3.84E-27 | 10 | Tbc1d30       |
| 1.596967105 | 6.93E-23 | 5.19E-27 | 10 | Zfp623        |
| 1.676901254 | 1.12E-22 | 8.38E-27 | 10 | Tmco4         |
| 2.679545608 | 1.23E-22 | 9.18E-27 | 10 | Zfp511        |
| 1.461466536 | 1.73E-22 | 1.30E-26 | 10 | Trip6         |
| 1.479534595 | 1.77E-22 | 1.33E-26 | 10 | Trim37        |
| 1.556851076 | 2.11E-22 | 1.58E-26 | 10 | Suv39h1       |
| 1.383200094 | 2.33E-22 | 1.74E-26 | 10 | Def8          |
| 1.185097725 | 2.84E-22 | 2.13E-26 | 10 | Ncapg         |
| 1.000725693 | 3.82E-22 | 2.86E-26 | 10 | Cep57l1       |
| 1.133363413 | 6.07E-22 | 4.54E-26 | 10 | Kif11         |
| 1.122469485 | 6.20E-22 | 4.64E-26 | 10 | Nol9          |
| 0.839328605 | 7.39E-22 | 5.53E-26 | 10 | Knstrn        |
| 1.031806042 | 7.92E-22 | 5.93E-26 | 10 | Usp53         |
| 1.662870245 | 9.59E-22 | 7.19E-26 | 10 | Rarg          |
| 2.89694048  | 1.12E-21 | 8.38E-26 | 10 | Ccl17         |
| 1.247883397 | 1.29E-21 | 9.66E-26 | 10 | Hist1h4d      |
| 0.967273901 | 1.33E-21 | 9.98E-26 | 10 | Npm3          |
| 0.905944129 | 1.80E-21 | 1.35E-25 | 10 | Nalcn         |
| 0.954358264 | 2.03E-21 | 1.52E-25 | 10 | Mphosph9      |
| 1.196532294 | 2.12E-21 | 1.59E-25 | 10 | St7           |
| 1.32382145  | 2.68E-21 | 2.01E-25 | 10 | Wdhd1         |
| 0.649296809 | 3.90E-21 | 2.92E-25 | 10 | Cystm1        |
| 1.30982697  | 4.17E-21 | 3.12E-25 | 10 | Diap3         |
| 2.558728176 | 4.26E-21 | 3.19E-25 | 10 | Birc5         |
| 1.357756297 | 4.49E-21 | 3.36E-25 | 10 | Polr1b        |
| 0.946872399 | 4.59E-21 | 3.44E-25 | 10 | Fam73a        |
| 1.058098034 | 4.62E-21 | 3.46E-25 | 10 | Unc119b       |
| 1.236129326 | 5.16E-21 | 3.87E-25 | 10 | Pomt1         |
| 1.084055296 | 5.26E-21 | 3.94E-25 | 10 | Ndc80         |
| 1.752013854 | 7.03E-21 | 5.27E-25 | 10 | Ncapd3        |
| 0.777430638 | 7.05E-21 | 5.28E-25 | 10 | Card9         |
| 1.634623999 | 7.77E-21 | 5.82E-25 | 10 | Zswim7        |
| 0.952864349 | 1.06E-20 | 7.92E-25 | 10 | Rpap2         |
| 1.475070749 | 1.19E-20 | 8.92E-25 | 10 | Racgap1       |
| 1.70369335  | 1.32E-20 | 9.85E-25 | 10 | Dcps          |
| 2.308743506 | 1.46E-20 | 1.09E-24 | 10 | Cenpe         |
| 0.603515911 | 1.53E-20 | 1.14E-24 | 10 | Zfp518b       |
| 1.175611477 | 1.64E-20 | 1.23E-24 | 10 | Nol10         |
| 1.072651305 | 1.98E-20 | 1.48E-24 | 10 | Mtrf1l        |
| 0.887964062 | 2.27E-20 | 1.70E-24 | 10 | Zfp58         |
| 0.913531912 | 2.56E-20 | 1.92E-24 | 10 | Hyal1         |
| 1.169830897 | 3.02E-20 | 2.26E-24 | 10 | Lysmd3        |
| 1.456461227 | 3.58E-20 | 2.68E-24 | 10 | Pwp2          |
| 0.862704395 | 3.76E-20 | 2.82E-24 | 10 | Tubgcp6       |
| 1.001485578 | 3.96E-20 | 2.97E-24 | 10 | Ppm1f         |



|             |          |          |    |            |
|-------------|----------|----------|----|------------|
| 1.735371865 | 4.43E-20 | 3.32E-24 | 10 | Chpf2      |
| 1.175352972 | 4.67E-20 | 3.50E-24 | 10 | H2afx      |
| 1.184138755 | 6.12E-20 | 4.58E-24 | 10 | Zfp429     |
| 1.543921058 | 7.83E-20 | 5.86E-24 | 10 | Zcchc10    |
| 1.356314618 | 1.08E-19 | 8.12E-24 | 10 | Slc30a6    |
| 0.91872133  | 1.15E-19 | 8.64E-24 | 10 | Coprs      |
| 1.349034258 | 1.35E-19 | 1.01E-23 | 10 | Cenpf      |
| 0.674372912 | 1.46E-19 | 1.09E-23 | 10 | Tdp1       |
| 1.013459486 | 1.53E-19 | 1.15E-23 | 10 | Pard6a     |
| 1.264842095 | 1.69E-19 | 1.27E-23 | 10 | Zfp53      |
| 0.793846213 | 1.86E-19 | 1.39E-23 | 10 | Ccna2      |
| 1.149673914 | 1.98E-19 | 1.49E-23 | 10 | Klhl11     |
| 1.204618822 | 2.19E-19 | 1.64E-23 | 10 | Ap3m2      |
| 1.363027706 | 2.49E-19 | 1.86E-23 | 10 | Pnpt1      |
| 2.016965586 | 2.65E-19 | 1.98E-23 | 10 | Tpx2       |
| 0.966771789 | 2.95E-19 | 2.21E-23 | 10 | Adat2      |
| 0.99633344  | 3.08E-19 | 2.31E-23 | 10 | Sirpb1a    |
| 1.360817984 | 3.37E-19 | 2.52E-23 | 10 | Ccdc91     |
| 1.264315934 | 3.42E-19 | 2.56E-23 | 10 | Emc9       |
| 0.835599159 | 4.24E-19 | 3.17E-23 | 10 | Pi15       |
| 1.321433948 | 4.39E-19 | 3.29E-23 | 10 | Alg8       |
| 0.653983365 | 4.50E-19 | 3.37E-23 | 10 | Palld      |
| 1.262524461 | 6.51E-19 | 4.88E-23 | 10 | Hemk1      |
| 1.092444844 | 6.55E-19 | 4.90E-23 | 10 | Bid        |
| 1.065815496 | 6.83E-19 | 5.12E-23 | 10 | Usp30      |
| 1.576693704 | 7.07E-19 | 5.29E-23 | 10 | Cdh1       |
| 1.577084989 | 8.78E-19 | 6.57E-23 | 10 | Crip2      |
| 1.6061455   | 1.13E-18 | 8.47E-23 | 10 | Ppp2r5d    |
| 0.70748848  | 1.13E-18 | 8.48E-23 | 10 | Brca1      |
| 1.289237456 | 1.33E-18 | 9.94E-23 | 10 | Ttc37      |
| 1.989935489 | 1.61E-18 | 1.20E-22 | 10 | Rad9a      |
| 2.155936628 | 1.73E-18 | 1.29E-22 | 10 | Prc1       |
| 1.787632417 | 1.74E-18 | 1.30E-22 | 10 | Mast2      |
| 1.946267643 | 1.94E-18 | 1.45E-22 | 10 | Dkc1       |
| 1.45066898  | 2.17E-18 | 1.62E-22 | 10 | Rffl       |
| 1.692598946 | 2.20E-18 | 1.65E-22 | 10 | Ccdc163    |
| 1.874014989 | 2.46E-18 | 1.84E-22 | 10 | D10Wsu102e |
| 2.050348965 | 2.52E-18 | 1.89E-22 | 10 | Slc7a1     |
| 0.740601699 | 2.91E-18 | 2.18E-22 | 10 | Gm5512     |
| 0.863156782 | 2.92E-18 | 2.18E-22 | 10 | Dppa3      |
| 1.267840772 | 3.16E-18 | 2.37E-22 | 10 | Wipi2      |
| 2.078712567 | 3.26E-18 | 2.44E-22 | 10 | Acta2      |
| 0.598367861 | 3.45E-18 | 2.59E-22 | 10 | Zfp719     |
| 0.815495912 | 3.70E-18 | 2.77E-22 | 10 | Adsl       |
| 1.551629329 | 4.13E-18 | 3.10E-22 | 10 | Car13      |
| 0.998505937 | 4.76E-18 | 3.56E-22 | 10 | Vezt       |
| 1.309294063 | 6.00E-18 | 4.49E-22 | 10 | Gtf3c4     |
| 1.12468778  | 6.30E-18 | 4.72E-22 | 10 | Cdk5rap1   |
| 1.728511222 | 7.42E-18 | 5.56E-22 | 10 | Ttpal      |
| 1.601356316 | 7.59E-18 | 5.69E-22 | 10 | Carm1      |
| 1.66903001  | 8.77E-18 | 6.57E-22 | 10 | Hspg2      |
| 0.515881748 | 9.08E-18 | 6.80E-22 | 10 | Grhl1      |
| 1.404572277 | 9.49E-18 | 7.11E-22 | 10 | Gatsl3     |
| 1.025358147 | 1.01E-17 | 7.58E-22 | 10 | Mvk        |
| 0.571034282 | 1.01E-17 | 7.58E-22 | 10 | Serpine2   |
| 1.381921111 | 1.27E-17 | 9.49E-22 | 10 | G2e3       |
| 0.833560401 | 1.74E-17 | 1.30E-21 | 10 | Helz2      |
| 1.037779544 | 1.82E-17 | 1.36E-21 | 10 | Snrnp35    |
| 0.835121581 | 2.32E-17 | 1.73E-21 | 10 | Acbd4      |
| 1.214559785 | 2.45E-17 | 1.84E-21 | 10 | Hdac3      |
| 0.921981547 | 3.08E-17 | 2.30E-21 | 10 | Rapgef5    |

|             |          |          |    |               |
|-------------|----------|----------|----|---------------|
| 1.436334261 | 3.17E-17 | 2.38E-21 | 10 | Rfc3          |
| 0.789008794 | 3.28E-17 | 2.46E-21 | 10 | Frat2         |
| 1.395796689 | 3.48E-17 | 2.61E-21 | 10 | Nup133        |
| 1.031878377 | 3.82E-17 | 2.86E-21 | 10 | Abtb1         |
| 1.299233945 | 3.82E-17 | 2.86E-21 | 10 | Gle1          |
| 1.204663035 | 4.90E-17 | 3.67E-21 | 10 | Flad1         |
| 1.326636538 | 5.42E-17 | 4.06E-21 | 10 | Smad3         |
| 0.880776918 | 6.65E-17 | 4.98E-21 | 10 | 9430020K01Rik |
| 1.909663656 | 7.00E-17 | 5.24E-21 | 10 | Dhdds         |
| 1.066158982 | 7.15E-17 | 5.36E-21 | 10 | Smim24        |
| 1.836265948 | 7.16E-17 | 5.37E-21 | 10 | Supt20        |
| 1.400970292 | 8.98E-17 | 6.73E-21 | 10 | Chml          |
| 0.800603909 | 9.26E-17 | 6.93E-21 | 10 | Zfp956        |
| 0.559492521 | 1.12E-16 | 8.35E-21 | 10 | 4632427E13Rik |
| 1.302342312 | 1.59E-16 | 1.19E-20 | 10 | 1110001J03Rik |
| 0.539338109 | 1.70E-16 | 1.27E-20 | 10 | Capn10        |
| 1.459163905 | 1.79E-16 | 1.34E-20 | 10 | Map4k1        |
| 1.698009364 | 1.89E-16 | 1.42E-20 | 10 | Nup210        |
| 1.554383884 | 2.00E-16 | 1.50E-20 | 10 | Nck1          |
| 1.775647575 | 2.01E-16 | 1.50E-20 | 10 | Gpr171        |
| 1.425063199 | 2.26E-16 | 1.69E-20 | 10 | Rdh13         |
| 1.173223999 | 2.36E-16 | 1.77E-20 | 10 | Asb6          |
| 1.489161584 | 2.42E-16 | 1.81E-20 | 10 | Fastkd2       |
| 0.934771228 | 2.64E-16 | 1.98E-20 | 10 | 2610034B18Rik |
| 1.93408862  | 2.65E-16 | 1.99E-20 | 10 | Cpe           |
| 1.072410497 | 2.69E-16 | 2.02E-20 | 10 | Zfp948        |
| 1.587625924 | 2.89E-16 | 2.17E-20 | 10 | Ckap2l        |
| 1.342977021 | 2.91E-16 | 2.18E-20 | 10 | Dnajc9        |
| 0.924456998 | 3.03E-16 | 2.27E-20 | 10 | Amica1        |
| 0.69279546  | 3.36E-16 | 2.52E-20 | 10 | Exog          |
| 0.869603618 | 3.62E-16 | 2.71E-20 | 10 | Gstt2         |
| 1.214559785 | 3.64E-16 | 2.73E-20 | 10 | Zfp943        |
| 0.944284382 | 4.06E-16 | 3.04E-20 | 10 | Bub1b         |
| 1.118485299 | 4.21E-16 | 3.15E-20 | 10 | 1110065P20Rik |
| 0.974014917 | 4.41E-16 | 3.31E-20 | 10 | Klf11         |
| 1.7643501   | 5.37E-16 | 4.02E-20 | 10 | Csnk2a2       |
| 1.68536351  | 6.12E-16 | 4.58E-20 | 10 | Rai14         |
| 1.905764015 | 9.19E-16 | 6.88E-20 | 10 | Itga8         |
| 0.803689482 | 1.15E-15 | 8.64E-20 | 10 | Abhd10        |
| 0.736375915 | 1.32E-15 | 9.90E-20 | 10 | A1846148      |
| 0.73285286  | 1.39E-15 | 1.04E-19 | 10 | Syn1          |
| 0.803629346 | 1.60E-15 | 1.20E-19 | 10 | Aph1a         |
| 0.566206515 | 1.66E-15 | 1.24E-19 | 10 | Elp6          |
| 1.533890884 | 1.66E-15 | 1.24E-19 | 10 | Pelp1         |
| 0.906456766 | 1.82E-15 | 1.37E-19 | 10 | Chtf18        |
| 2.069767657 | 1.99E-15 | 1.49E-19 | 10 | Oma1          |
| 1.184475474 | 2.29E-15 | 1.71E-19 | 10 | Rpp14         |
| 1.018613317 | 2.38E-15 | 1.79E-19 | 10 | Gatsl2        |
| 0.940036563 | 2.68E-15 | 2.01E-19 | 10 | A530054K11Rik |
| 1.104785148 | 2.77E-15 | 2.07E-19 | 10 | Wdr4          |
| 0.544229952 | 2.93E-15 | 2.20E-19 | 10 | Hist1h3d      |
| 1.423893748 | 3.36E-15 | 2.52E-19 | 10 | Ctgf          |
| 0.875403273 | 3.53E-15 | 2.64E-19 | 10 | Gm10400       |
| 1.077368703 | 3.54E-15 | 2.65E-19 | 10 | Angptl4       |
| 0.920416162 | 4.05E-15 | 3.03E-19 | 10 | Mx2           |
| 1.181984232 | 4.29E-15 | 3.21E-19 | 10 | Bola1         |
| 0.938223475 | 4.95E-15 | 3.71E-19 | 10 | Tom1l2        |
| 1.563658858 | 5.14E-15 | 3.85E-19 | 10 | Spdl1         |
| 0.997915792 | 5.52E-15 | 4.14E-19 | 10 | Nicn1         |
| 1.806424164 | 5.84E-15 | 4.38E-19 | 10 | Eefsec        |
| 1.441072654 | 5.98E-15 | 4.48E-19 | 10 | Arhgap11a     |

|             |          |          |    |               |
|-------------|----------|----------|----|---------------|
| 1.352688212 | 6.32E-15 | 4.74E-19 | 10 | Spint1        |
| 0.779490792 | 6.82E-15 | 5.11E-19 | 10 | Gramd4        |
| 1.293492282 | 8.59E-15 | 6.43E-19 | 10 | Dis3l         |
| 0.955722311 | 9.27E-15 | 6.94E-19 | 10 | Aldh4a1       |
| 1.078548644 | 9.80E-15 | 7.34E-19 | 10 | Unk           |
| 1.775739624 | 1.01E-14 | 7.60E-19 | 10 | Taf4a         |
| 1.626740318 | 1.12E-14 | 8.38E-19 | 10 | Myg1          |
| 1.369423702 | 1.16E-14 | 8.68E-19 | 10 | A830080D01Rik |
| 1.246103731 | 1.22E-14 | 9.13E-19 | 10 | Cep128        |
| 0.945727731 | 1.23E-14 | 9.20E-19 | 10 | Trmt61b       |
| 0.566882678 | 1.23E-14 | 9.25E-19 | 10 | Tctn3         |
| 1.591292504 | 1.30E-14 | 9.71E-19 | 10 | Ndufaf4       |
| 1.322181612 | 1.41E-14 | 1.05E-18 | 10 | G530011O06Rik |
| 1.028395372 | 1.52E-14 | 1.14E-18 | 10 | Rbpms         |
| 1.141081752 | 1.58E-14 | 1.18E-18 | 10 | Slc16a1       |
| 1.666220699 | 1.66E-14 | 1.24E-18 | 10 | Maz           |
| 0.342185642 | 2.15E-14 | 1.61E-18 | 10 | Sbk1          |
| 0.938068311 | 2.35E-14 | 1.76E-18 | 10 | Prkci         |
| 1.601753354 | 2.62E-14 | 1.97E-18 | 10 | Tacc3         |
| 0.857427338 | 2.92E-14 | 2.19E-18 | 10 | Hic2          |
| 1.80779152  | 2.98E-14 | 2.23E-18 | 10 | Hsf1          |
| 1.451365568 | 3.26E-14 | 2.44E-18 | 10 | Pwp1          |
| 0.855254841 | 4.05E-14 | 3.03E-18 | 10 | Depdc5        |
| 0.954146098 | 4.11E-14 | 3.08E-18 | 10 | Trmt10a       |
| 1.229456286 | 4.46E-14 | 3.34E-18 | 10 | Zfp790        |
| 0.818415486 | 4.51E-14 | 3.38E-18 | 10 | Edc3          |
| 0.767888793 | 4.55E-14 | 3.41E-18 | 10 | Pkmyt1        |
| 1.156109558 | 4.96E-14 | 3.72E-18 | 10 | Xpa           |
| 0.708359898 | 5.78E-14 | 4.33E-18 | 10 | Ndufaf6       |
| 0.819331188 | 5.92E-14 | 4.43E-18 | 10 | Card11        |
| 1.061162701 | 6.87E-14 | 5.15E-18 | 10 | Cdan1         |
| 1.338938574 | 7.46E-14 | 5.58E-18 | 10 | Spata5        |
| 1.469533309 | 7.99E-14 | 5.98E-18 | 10 | Sipa1l1       |
| 0.829954472 | 8.30E-14 | 6.22E-18 | 10 | Nudt6         |
| 0.854960866 | 8.33E-14 | 6.24E-18 | 10 | Pomgnt1       |
| 0.825937728 | 8.41E-14 | 6.30E-18 | 10 | Pold2         |
| 0.717734742 | 9.75E-14 | 7.31E-18 | 10 | Tspyl3        |
| 1.032366777 | 9.79E-14 | 7.33E-18 | 10 | Gm16062       |
| 1.068350328 | 9.85E-14 | 7.38E-18 | 10 | Pusl1         |
| 0.623998794 | 1.09E-13 | 8.18E-18 | 10 | Kctd9         |
| 1.368190008 | 1.20E-13 | 9.00E-18 | 10 | Atg4b         |
| 0.688351008 | 1.23E-13 | 9.19E-18 | 10 | Cenpq         |
| 1.240802439 | 1.25E-13 | 9.40E-18 | 10 | Mcat          |
| 0.637020226 | 1.40E-13 | 1.05E-17 | 10 | Fastk         |
| 0.95397008  | 1.41E-13 | 1.06E-17 | 10 | Casc5         |
| 0.961159232 | 1.51E-13 | 1.13E-17 | 10 | Slc30a4       |
| 0.785143768 | 1.74E-13 | 1.30E-17 | 10 | Smim4         |
| 1.173672552 | 1.75E-13 | 1.31E-17 | 10 | 5730408K05Rik |
| 1.294865672 | 1.94E-13 | 1.45E-17 | 10 | Dera          |
| 1.372238863 | 2.22E-13 | 1.66E-17 | 10 | Bag4          |
| 0.335607226 | 2.36E-13 | 1.76E-17 | 10 | Cdk5r1        |
| 1.686441582 | 2.63E-13 | 1.97E-17 | 10 | Zbed6         |
| 1.380858832 | 3.19E-13 | 2.39E-17 | 10 | Atg10         |
| 1.805312436 | 3.56E-13 | 2.67E-17 | 10 | Smc2          |
| 0.870472156 | 3.63E-13 | 2.72E-17 | 10 | 1110059E24Rik |
| 0.660357358 | 3.72E-13 | 2.78E-17 | 10 | Alg6          |
| 0.968709864 | 3.79E-13 | 2.84E-17 | 10 | 2810417H13Rik |
| 1.260244978 | 4.45E-13 | 3.34E-17 | 10 | Lmnb2         |
| 0.863057846 | 5.00E-13 | 3.75E-17 | 10 | Iqcb1         |
| 1.934056487 | 5.17E-13 | 3.87E-17 | 10 | Fhl1          |
| 1.063922586 | 6.13E-13 | 4.59E-17 | 10 | Vrk3          |

|             |          |          |    |               |
|-------------|----------|----------|----|---------------|
| 1.000136878 | 6.36E-13 | 4.77E-17 | 10 | Rnf215        |
| 0.448922054 | 7.34E-13 | 5.50E-17 | 10 | Snora65       |
| 0.501210165 | 7.61E-13 | 5.70E-17 | 10 | Ddx28         |
| 1.449822834 | 7.64E-13 | 5.73E-17 | 10 | Flrt3         |
| 0.828743947 | 9.10E-13 | 6.82E-17 | 10 | Lmcd1         |
| 2.508920316 | 1.05E-12 | 7.84E-17 | 10 | Mki67         |
| 0.690049419 | 1.05E-12 | 7.90E-17 | 10 | Oraov1        |
| 1.397618666 | 1.20E-12 | 8.99E-17 | 10 | Tspan5        |
| 1.043659832 | 1.29E-12 | 9.63E-17 | 10 | Lin54         |
| 0.36042391  | 1.34E-12 | 1.00E-16 | 10 | Slc24a1       |
| 1.359439274 | 1.45E-12 | 1.09E-16 | 10 | Wash          |
| 1.261951022 | 1.58E-12 | 1.18E-16 | 10 | Nxt1          |
| 1.18954305  | 1.62E-12 | 1.21E-16 | 10 | Cd99l2        |
| 0.960398367 | 1.67E-12 | 1.25E-16 | 10 | Tgfbr3        |
| 0.881878816 | 1.98E-12 | 1.49E-16 | 10 | Kri1          |
| 0.865097902 | 2.04E-12 | 1.53E-16 | 10 | Tmem181a      |
| 1.128537874 | 2.35E-12 | 1.76E-16 | 10 | Rbm3          |
| 0.638218262 | 2.41E-12 | 1.80E-16 | 10 | Pdp2          |
| 1.274786849 | 2.42E-12 | 1.82E-16 | 10 | Ftsj1         |
| 0.914580982 | 2.51E-12 | 1.88E-16 | 10 | Cnot11        |
| 0.840382723 | 2.63E-12 | 1.97E-16 | 10 | 2210016L21Rik |
| 1.1491898   | 2.77E-12 | 2.07E-16 | 10 | Ciita         |
| 1.297592404 | 2.82E-12 | 2.11E-16 | 10 | Dkk3          |
| 1.348779894 | 3.03E-12 | 2.27E-16 | 10 | Fgd6          |
| 0.799300082 | 3.27E-12 | 2.45E-16 | 10 | Taf11         |
| 1.372776671 | 3.37E-12 | 2.53E-16 | 10 | Lcorl         |
| 0.760553613 | 3.61E-12 | 2.70E-16 | 10 | Ints10        |
| 0.914575171 | 3.65E-12 | 2.73E-16 | 10 | Vps8          |
| 0.735651969 | 4.03E-12 | 3.02E-16 | 10 | Fam167a       |
| 1.299981331 | 4.37E-12 | 3.27E-16 | 10 | Zfp260        |
| 1.076713781 | 4.71E-12 | 3.53E-16 | 10 | Dgcr8         |
| 1.023527955 | 5.13E-12 | 3.84E-16 | 10 | Prcc1         |
| 0.636378624 | 5.24E-12 | 3.93E-16 | 10 | 2310010J17Rik |
| 0.702300668 | 5.83E-12 | 4.36E-16 | 10 | Smim5         |
| 1.65059163  | 5.84E-12 | 4.38E-16 | 10 | Fam45a        |
| 0.521947189 | 6.00E-12 | 4.49E-16 | 10 | Nsmf          |
| 0.731701449 | 6.13E-12 | 4.59E-16 | 10 | Mad2l1bp      |
| 0.584810329 | 6.30E-12 | 4.72E-16 | 10 | Cxx1a         |
| 0.641302888 | 7.11E-12 | 5.33E-16 | 10 | Nrip1         |
| 2.050232083 | 7.13E-12 | 5.34E-16 | 10 | F10           |
| 0.370949671 | 7.59E-12 | 5.69E-16 | 10 | 4921531C22Rik |
| 1.384584611 | 7.64E-12 | 5.72E-16 | 10 | Rnf103        |
| 0.465126652 | 7.67E-12 | 5.74E-16 | 10 | 4930578M01Rik |
| 0.89093925  | 8.06E-12 | 6.03E-16 | 10 | Atad3a        |
| 0.771082406 | 8.31E-12 | 6.23E-16 | 10 | E2f6          |
| 1.229948291 | 8.83E-12 | 6.61E-16 | 10 | Zfp52         |
| 1.683891112 | 9.07E-12 | 6.80E-16 | 10 | Cd274         |
| 1.052295066 | 9.40E-12 | 7.04E-16 | 10 | Exoc7         |
| 1.436688375 | 9.50E-12 | 7.12E-16 | 10 | St3gal2       |
| 1.286430094 | 9.74E-12 | 7.29E-16 | 10 | Ripk3         |
| 0.671608827 | 1.03E-11 | 7.69E-16 | 10 | 4930430F08Rik |
| 1.204113039 | 1.03E-11 | 7.70E-16 | 10 | Abcf2         |
| 0.788323201 | 1.10E-11 | 8.24E-16 | 10 | Ift57         |
| 1.185043732 | 1.22E-11 | 9.17E-16 | 10 | Jmjd8         |
| 0.933397948 | 1.25E-11 | 9.33E-16 | 10 | Alkbh2        |
| 1.109410974 | 1.31E-11 | 9.81E-16 | 10 | Pik3r6        |
| 1.416581076 | 1.46E-11 | 1.09E-15 | 10 | Atp13a1       |
| 0.828181998 | 1.54E-11 | 1.15E-15 | 10 | Sec61a2       |
| 1.121128739 | 1.54E-11 | 1.15E-15 | 10 | Phyhd1        |
| 1.224388657 | 1.77E-11 | 1.32E-15 | 10 | Ezh2          |
| 0.958014575 | 1.77E-11 | 1.33E-15 | 10 | Cd5l          |

|             |          |          |    |               |
|-------------|----------|----------|----|---------------|
| 0.848021947 | 1.87E-11 | 1.40E-15 | 10 | Kdm4c         |
| 0.625343379 | 1.88E-11 | 1.41E-15 | 10 | Tmem216       |
| 1.158767094 | 2.07E-11 | 1.55E-15 | 10 | Otud6b        |
| 1.595848118 | 2.12E-11 | 1.59E-15 | 10 | Prkd3         |
| 1.577380368 | 2.12E-11 | 1.59E-15 | 10 | Gmps          |
| 1.533741183 | 2.18E-11 | 1.63E-15 | 10 | Zmym4         |
| 1.123529014 | 2.30E-11 | 1.72E-15 | 10 | Dennd6a       |
| 0.680940517 | 2.36E-11 | 1.77E-15 | 10 | Metrn         |
| 0.758593411 | 2.40E-11 | 1.80E-15 | 10 | Kntc1         |
| 1.304056263 | 2.48E-11 | 1.86E-15 | 10 | Tmem175       |
| 0.946180118 | 2.50E-11 | 1.87E-15 | 10 | Ngrn          |
| 1.694845526 | 2.50E-11 | 1.88E-15 | 10 | Cep63         |
| 0.686275242 | 2.55E-11 | 1.91E-15 | 10 | F2r           |
| 1.261131218 | 2.61E-11 | 1.95E-15 | 10 | Pdzd11        |
| 0.484482951 | 2.87E-11 | 2.15E-15 | 10 | Yae1d1        |
| 0.56710646  | 3.05E-11 | 2.29E-15 | 10 | Zfp367        |
| 1.584616321 | 3.30E-11 | 2.47E-15 | 10 | Yars          |
| 1.346482107 | 3.38E-11 | 2.53E-15 | 10 | Gdf3          |
| 0.875685107 | 3.39E-11 | 2.54E-15 | 10 | Tug1          |
| 0.460947768 | 3.51E-11 | 2.63E-15 | 10 | Ghdc          |
| 0.691564723 | 3.55E-11 | 2.66E-15 | 10 | Il1rap        |
| 0.522481056 | 4.08E-11 | 3.06E-15 | 10 | Pex11g        |
| 0.96511455  | 4.24E-11 | 3.17E-15 | 10 | Trappc9       |
| 1.790906661 | 4.41E-11 | 3.30E-15 | 10 | Arid5b        |
| 1.242168402 | 4.54E-11 | 3.40E-15 | 10 | Wdfy1         |
| 1.422268649 | 4.77E-11 | 3.57E-15 | 10 | Eci2          |
| 2.248650116 | 5.31E-11 | 3.98E-15 | 10 | Top2a         |
| 1.686188378 | 6.06E-11 | 4.54E-15 | 10 | Pmm2          |
| 0.936176842 | 6.16E-11 | 4.61E-15 | 10 | Rpl9          |
| 0.67630267  | 6.77E-11 | 5.07E-15 | 10 | Acaca         |
| 0.620119526 | 7.69E-11 | 5.76E-15 | 10 | Snhg4         |
| 1.440430182 | 8.02E-11 | 6.00E-15 | 10 | Prpf38a       |
| 1.01319768  | 8.11E-11 | 6.07E-15 | 10 | Tmem41b       |
| 1.118498398 | 8.18E-11 | 6.13E-15 | 10 | Atg14         |
| 0.584810329 | 8.66E-11 | 6.49E-15 | 10 | Cbwd1         |
| 1.553883348 | 8.74E-11 | 6.55E-15 | 10 | Ccdc132       |
| 1.381885111 | 9.01E-11 | 6.75E-15 | 10 | Smarcc1       |
| 1.211527233 | 9.23E-11 | 6.91E-15 | 10 | Ttf1          |
| 0.680589003 | 9.37E-11 | 7.02E-15 | 10 | C920021L13Rik |
| 0.742382155 | 9.75E-11 | 7.30E-15 | 10 | Med20         |
| 1.313344831 | 1.03E-10 | 7.74E-15 | 10 | Wdr45         |
| 0.419749336 | 1.16E-10 | 8.65E-15 | 10 | Lphn1         |
| 0.882176499 | 1.36E-10 | 1.02E-14 | 10 | Efna5         |
| 0.999172648 | 1.44E-10 | 1.08E-14 | 10 | Mrps5         |
| 1.940974662 | 1.47E-10 | 1.10E-14 | 10 | Cdc25a        |
| 0.793337482 | 1.67E-10 | 1.25E-14 | 10 | Tlcd1         |
| 1.395122623 | 1.69E-10 | 1.27E-14 | 10 | Rapgef1       |
| 1.236397614 | 1.75E-10 | 1.31E-14 | 10 | 2210015D19Rik |
| 0.469316468 | 1.80E-10 | 1.35E-14 | 10 | Ube2t         |
| 0.773443299 | 1.82E-10 | 1.36E-14 | 10 | Fktn          |
| 0.889233366 | 1.87E-10 | 1.40E-14 | 10 | Mylk          |
| 0.784793905 | 1.93E-10 | 1.45E-14 | 10 | Kif23         |
| 1.12544752  | 1.98E-10 | 1.48E-14 | 10 | 2810013P06Rik |
| 0.963768331 | 2.05E-10 | 1.54E-14 | 10 | Fam122a       |
| 0.37819608  | 2.13E-10 | 1.59E-14 | 10 | Gpatch2       |
| 1.458070299 | 2.24E-10 | 1.67E-14 | 10 | Mrps11        |
| 1.332556437 | 2.25E-10 | 1.68E-14 | 10 | Rbm34         |
| 0.622903809 | 2.26E-10 | 1.70E-14 | 10 | Tada2a        |
| 0.696173734 | 2.40E-10 | 1.80E-14 | 10 | Bloc1s4       |
| 0.49175078  | 2.66E-10 | 2.00E-14 | 10 | Bend3         |
| 1.813833485 | 2.69E-10 | 2.02E-14 | 10 | Parp2         |

|             |          |          |    |               |
|-------------|----------|----------|----|---------------|
| 1.695563415 | 2.92E-10 | 2.18E-14 | 10 | Lmf2          |
| 0.733424452 | 2.96E-10 | 2.22E-14 | 10 | Med24         |
| 0.857329696 | 3.28E-10 | 2.45E-14 | 10 | Dnajib12      |
| 0.783661188 | 3.43E-10 | 2.57E-14 | 10 | Xab2          |
| 0.517794293 | 3.60E-10 | 2.69E-14 | 10 | Dolpp1        |
| 0.816309607 | 3.75E-10 | 2.81E-14 | 10 | Lphn2         |
| 0.609886692 | 3.83E-10 | 2.87E-14 | 10 | Jade3         |
| 1.72471247  | 3.86E-10 | 2.89E-14 | 10 | Arfrp1        |
| 1.053816594 | 3.86E-10 | 2.89E-14 | 10 | Klhl18        |
| 1.122582016 | 3.90E-10 | 2.92E-14 | 10 | Zfp593        |
| 0.582845049 | 3.92E-10 | 2.94E-14 | 10 | Igfbp6        |
| 0.905556114 | 4.13E-10 | 3.09E-14 | 10 | Deb1          |
| 0.434503792 | 4.46E-10 | 3.34E-14 | 10 | Creg2         |
| 1.568375562 | 4.57E-10 | 3.42E-14 | 10 | Iah1          |
| 0.964445466 | 4.66E-10 | 3.49E-14 | 10 | Phxr4         |
| 1.727488078 | 4.73E-10 | 3.54E-14 | 10 | Mapkap1       |
| 0.539582753 | 5.08E-10 | 3.81E-14 | 10 | Aplf          |
| 1.076185885 | 5.64E-10 | 4.22E-14 | 10 | Smarcd1       |
| 1.340015824 | 5.66E-10 | 4.24E-14 | 10 | Araf          |
| 1.052342135 | 6.48E-10 | 4.85E-14 | 10 | Lrif1         |
| 1.328864101 | 6.56E-10 | 4.91E-14 | 10 | Mad2l2        |
| 1.319051719 | 6.74E-10 | 5.05E-14 | 10 | Sec24a        |
| 1.334617262 | 6.87E-10 | 5.15E-14 | 10 | Naglu         |
| 0.852173983 | 7.44E-10 | 5.57E-14 | 10 | 1810026J23Rik |
| 0.822706307 | 7.70E-10 | 5.77E-14 | 10 | Usp22         |
| 1.13697002  | 7.98E-10 | 5.97E-14 | 10 | Tmem198b      |
| 1.092287133 | 8.02E-10 | 6.01E-14 | 10 | Eaf1          |
| 1.056749416 | 8.05E-10 | 6.03E-14 | 10 | Ptgs2         |
| 1.109360204 | 8.10E-10 | 6.06E-14 | 10 | Hps4          |
| 1.546236875 | 8.34E-10 | 6.25E-14 | 10 | Ltbr          |
| 0.549907458 | 8.41E-10 | 6.30E-14 | 10 | Lrrc27        |
| 1.039065602 | 8.47E-10 | 6.34E-14 | 10 | Syvn1         |
| 1.282324783 | 8.56E-10 | 6.41E-14 | 10 | Eif1ad        |
| 1.235409233 | 8.78E-10 | 6.57E-14 | 10 | Dohh          |
| 1.425339379 | 9.31E-10 | 6.97E-14 | 10 | AA467197      |
| 0.690842147 | 9.49E-10 | 7.11E-14 | 10 | Snip1         |
| 1.169323669 | 9.62E-10 | 7.20E-14 | 10 | Xrn1          |
| 1.405443882 | 9.80E-10 | 7.34E-14 | 10 | Exosc9        |
| 0.567178066 | 9.87E-10 | 7.39E-14 | 10 | Otud3         |
| 1.107356945 | 1.00E-09 | 7.52E-14 | 10 | Mettl6        |
| 1.43209039  | 1.04E-09 | 7.78E-14 | 10 | Hbs1l         |
| 0.819288366 | 1.04E-09 | 7.78E-14 | 10 | Cdo1          |
| 0.889411643 | 1.05E-09 | 7.85E-14 | 10 | Endov         |
| 0.90180143  | 1.07E-09 | 8.02E-14 | 10 | Ankrd13c      |
| 1.178654996 | 1.10E-09 | 8.25E-14 | 10 | Tssc1         |
| 1.016347332 | 1.27E-09 | 9.52E-14 | 10 | Pml           |
| 1.010459479 | 1.28E-09 | 9.55E-14 | 10 | Dcaf13        |
| 1.470840464 | 1.37E-09 | 1.03E-13 | 10 | Man2a2        |
| 1.175365983 | 1.40E-09 | 1.05E-13 | 10 | Phkb          |
| 1.015172989 | 1.41E-09 | 1.05E-13 | 10 | Ndc1          |
| 0.936521035 | 1.58E-09 | 1.19E-13 | 10 | Cops7a        |
| 0.538514907 | 1.70E-09 | 1.28E-13 | 10 | Mpi           |
| 0.503803766 | 1.82E-09 | 1.37E-13 | 10 | Cstf2t        |
| 0.871360763 | 1.88E-09 | 1.40E-13 | 10 | Sephs1        |
| 1.334803883 | 1.90E-09 | 1.42E-13 | 10 | Slc39a6       |
| 0.91681726  | 1.94E-09 | 1.46E-13 | 10 | Cbl1          |
| 1.367200007 | 2.02E-09 | 1.52E-13 | 10 | Aars          |
| 0.551828227 | 2.17E-09 | 1.63E-13 | 10 | Disc1         |
| 0.689125002 | 2.19E-09 | 1.64E-13 | 10 | Ccdc167       |
| 0.764505182 | 2.19E-09 | 1.64E-13 | 10 | Men1          |
| 1.006804739 | 2.20E-09 | 1.65E-13 | 10 | Mis18a        |

|             |          |          |    |               |
|-------------|----------|----------|----|---------------|
| 1.277417213 | 2.25E-09 | 1.69E-13 | 10 | Ppap2c        |
| 0.750935245 | 2.32E-09 | 1.74E-13 | 10 | 1600010M07Rik |
| 1.318022254 | 2.51E-09 | 1.88E-13 | 10 | Fopnl         |
| 0.526041891 | 2.54E-09 | 1.90E-13 | 10 | 2410004N09Rik |
| 0.78235769  | 2.64E-09 | 1.98E-13 | 10 | Socs2         |
| 1.379563167 | 2.69E-09 | 2.02E-13 | 10 | Ap5s1         |
| 0.361198504 | 2.72E-09 | 2.04E-13 | 10 | Actg2         |
| 0.814839906 | 2.76E-09 | 2.07E-13 | 10 | Lyrm9         |
| 1.334954044 | 2.77E-09 | 2.07E-13 | 10 | Mllt4         |
| 1.090015637 | 2.88E-09 | 2.15E-13 | 10 | Ticam1        |
| 1.485611947 | 3.00E-09 | 2.24E-13 | 10 | Slc35b1       |
| 0.51161801  | 3.17E-09 | 2.37E-13 | 10 | Slc17a5       |
| 1.232928919 | 3.31E-09 | 2.48E-13 | 10 | B4galt3       |
| 1.295794857 | 3.41E-09 | 2.56E-13 | 10 | Nfya          |
| 1.542571959 | 3.49E-09 | 2.61E-13 | 10 | Tcof1         |
| 0.772426821 | 3.50E-09 | 2.62E-13 | 10 | Dym           |
| 0.751193998 | 3.57E-09 | 2.68E-13 | 10 | Arntl         |
| 0.987867538 | 3.82E-09 | 2.86E-13 | 10 | Sh3pxd2a      |
| 1.106759837 | 4.25E-09 | 3.18E-13 | 10 | Fgd4          |
| 0.691021237 | 4.54E-09 | 3.40E-13 | 10 | Dcaf4         |
| 0.936680433 | 4.74E-09 | 3.55E-13 | 10 | Slco3a1       |
| 0.743920859 | 5.84E-09 | 4.37E-13 | 10 | Tysnd1        |
| 0.466199685 | 5.84E-09 | 4.37E-13 | 10 | Tyms-ps       |
| 1.203934189 | 6.18E-09 | 4.63E-13 | 10 | Aim2          |
| 0.552378804 | 6.38E-09 | 4.78E-13 | 10 | Pmf1          |
| 1.327899366 | 6.41E-09 | 4.80E-13 | 10 | Pcp4l1        |
| 0.790201045 | 6.60E-09 | 4.94E-13 | 10 | Bin3          |
| 0.774389237 | 8.04E-09 | 6.02E-13 | 10 | Steap3        |
| 0.652632926 | 8.38E-09 | 6.27E-13 | 10 | Sox7          |
| 1.226679828 | 8.76E-09 | 6.56E-13 | 10 | Gpr107        |
| 0.435734073 | 8.95E-09 | 6.71E-13 | 10 | Rnf144b       |
| 1.166463696 | 9.48E-09 | 7.10E-13 | 10 | Scaf8         |
| 1.014622101 | 9.84E-09 | 7.37E-13 | 10 | Tmem203       |
| 0.401123585 | 1.01E-08 | 7.60E-13 | 10 | Aurka         |
| 0.895650231 | 1.05E-08 | 7.89E-13 | 10 | Ang           |
| 1.118357225 | 1.07E-08 | 7.98E-13 | 10 | Snhg5         |
| 1.394180483 | 1.09E-08 | 8.13E-13 | 10 | Cenpa         |
| 0.372778682 | 1.09E-08 | 8.20E-13 | 10 | Rbmx2         |
| 1.144079393 | 1.14E-08 | 8.51E-13 | 10 | Sec23b        |
| 0.948332971 | 1.20E-08 | 8.98E-13 | 10 | Micu1         |
| 1.204016265 | 1.21E-08 | 9.09E-13 | 10 | Kif1c         |
| 0.646336997 | 1.28E-08 | 9.57E-13 | 10 | Ppil1         |
| 0.492892974 | 1.29E-08 | 9.63E-13 | 10 | E130102H24Rik |
| 0.730957125 | 1.30E-08 | 9.72E-13 | 10 | Foxj3         |
| 1.367334544 | 1.31E-08 | 9.79E-13 | 10 | Sec13         |
| 1.494477058 | 1.34E-08 | 1.00E-12 | 10 | Prdm2         |
| 0.958875531 | 1.34E-08 | 1.00E-12 | 10 | Ppfibp2       |
| 1.239769085 | 1.42E-08 | 1.06E-12 | 10 | Ccrn4l        |
| 1.31545194  | 1.45E-08 | 1.08E-12 | 10 | Ccdc25        |
| 0.563187865 | 1.49E-08 | 1.12E-12 | 10 | Ccnyl1        |
| 1.003401446 | 1.55E-08 | 1.16E-12 | 10 | Mecr          |
| 0.63754268  | 1.63E-08 | 1.22E-12 | 10 | Mdm4          |
| 1.22673182  | 1.68E-08 | 1.26E-12 | 10 | Farsb         |
| 0.83114011  | 1.73E-08 | 1.30E-12 | 10 | Rnf40         |
| 1.058947291 | 1.75E-08 | 1.31E-12 | 10 | Tmem71        |
| 0.865670741 | 1.76E-08 | 1.32E-12 | 10 | 1700112E06Rik |
| 1.069285758 | 1.84E-08 | 1.37E-12 | 10 | Cdk10         |
| 1.613584428 | 1.86E-08 | 1.39E-12 | 10 | Gtf2f1        |
| 1.241140831 | 1.94E-08 | 1.45E-12 | 10 | Thoc6         |
| 0.789859218 | 1.95E-08 | 1.46E-12 | 10 | Lime1         |
| 1.05242426  | 1.96E-08 | 1.47E-12 | 10 | Prmt10        |

|             |          |          |    |               |
|-------------|----------|----------|----|---------------|
| 0.704161614 | 1.98E-08 | 1.48E-12 | 10 | Nrf1          |
| 1.287028067 | 2.01E-08 | 1.51E-12 | 10 | Khk           |
| 0.878378951 | 2.02E-08 | 1.51E-12 | 10 | Cwc27         |
| 0.765095857 | 2.10E-08 | 1.57E-12 | 10 | Nln           |
| 1.309865504 | 2.21E-08 | 1.66E-12 | 10 | Tmem120a      |
| 0.877648714 | 2.27E-08 | 1.70E-12 | 10 | Chfr          |
| 1.634336393 | 2.28E-08 | 1.71E-12 | 10 | Malt1         |
| 0.953263972 | 2.37E-08 | 1.78E-12 | 10 | Ago3          |
| 1.319335114 | 2.51E-08 | 1.88E-12 | 10 | Ube2d2a       |
| 0.494273254 | 2.54E-08 | 1.90E-12 | 10 | Dgke          |
| 0.322790042 | 2.58E-08 | 1.93E-12 | 10 | Tex9          |
| 0.685808788 | 2.61E-08 | 1.95E-12 | 10 | Ccdc28a       |
| 0.280867736 | 2.61E-08 | 1.96E-12 | 10 | Nup93         |
| 0.693322021 | 2.62E-08 | 1.96E-12 | 10 | Gm5617        |
| 1.301059424 | 2.72E-08 | 2.04E-12 | 10 | Tubb4b        |
| 1.150903904 | 2.89E-08 | 2.16E-12 | 10 | 2300009A05Rik |
| 1.21836962  | 2.92E-08 | 2.19E-12 | 10 | Opa1          |
| 1.415789548 | 3.10E-08 | 2.32E-12 | 10 | Nfatc1        |
| 1.223480183 | 3.16E-08 | 2.36E-12 | 10 | Vps37c        |
| 0.58181816  | 3.30E-08 | 2.47E-12 | 10 | Hes6          |
| 0.641004888 | 3.31E-08 | 2.48E-12 | 10 | Cdk1          |
| 1.255945562 | 3.37E-08 | 2.52E-12 | 10 | Cks1b         |
| 0.625691722 | 3.53E-08 | 2.64E-12 | 10 | Tmem184b      |
| 1.153924976 | 3.54E-08 | 2.65E-12 | 10 | Pogz          |
| 0.54904389  | 3.57E-08 | 2.67E-12 | 10 | Lnp           |
| 0.890093228 | 3.57E-08 | 2.67E-12 | 10 | Matk          |
| 0.746389793 | 3.65E-08 | 2.74E-12 | 10 | Kctd6         |
| 0.390888907 | 3.68E-08 | 2.76E-12 | 10 | Fgfrl1        |
| 0.57356794  | 3.80E-08 | 2.84E-12 | 10 | E130309D02Rik |
| 1.307675521 | 3.95E-08 | 2.96E-12 | 10 | Tmem214       |
| 1.854379954 | 4.05E-08 | 3.03E-12 | 10 | Atg2a         |
| 0.674570795 | 4.11E-08 | 3.08E-12 | 10 | Ttc39c        |
| 0.864115966 | 4.13E-08 | 3.09E-12 | 10 | Get4          |
| 0.622393041 | 4.20E-08 | 3.14E-12 | 10 | Zfp944        |
| 0.722700488 | 4.25E-08 | 3.18E-12 | 10 | Ncam1         |
| 1.38390873  | 4.28E-08 | 3.20E-12 | 10 | Inf2          |
| 0.847559318 | 4.30E-08 | 3.22E-12 | 10 | Wdr81         |
| 0.607264321 | 4.36E-08 | 3.27E-12 | 10 | Ubr7          |
| 1.363137159 | 4.46E-08 | 3.34E-12 | 10 | Pofut2        |
| 1.261350188 | 4.49E-08 | 3.36E-12 | 10 | Vac14         |
| 1.481191719 | 4.89E-08 | 3.66E-12 | 10 | Fam20c        |
| 0.696621321 | 5.02E-08 | 3.76E-12 | 10 | Sephs2        |
| 0.832600617 | 5.14E-08 | 3.85E-12 | 10 | Umps          |
| 0.762134558 | 5.23E-08 | 3.92E-12 | 10 | Srebf1        |
| 1.193554692 | 5.28E-08 | 3.95E-12 | 10 | Slc4a7        |
| 1.292646885 | 5.34E-08 | 4.00E-12 | 10 | Mlec          |
| 0.573554631 | 5.40E-08 | 4.04E-12 | 10 | Cog8          |
| 1.468359314 | 5.48E-08 | 4.10E-12 | 10 | Kcnq1ot1      |
| 1.362682807 | 5.48E-08 | 4.10E-12 | 10 | Gadd45gip1    |
| 0.358393453 | 5.76E-08 | 4.31E-12 | 10 | Dnaaf3        |
| 0.872900282 | 5.76E-08 | 4.32E-12 | 10 | Rtn4ip1       |
| 1.171792371 | 6.07E-08 | 4.55E-12 | 10 | Timm10        |
| 0.413671768 | 6.12E-08 | 4.59E-12 | 10 | Rapsn         |
| 0.918076624 | 6.26E-08 | 4.69E-12 | 10 | Nusap1        |
| 1.02026121  | 6.39E-08 | 4.78E-12 | 10 | Ankib1        |
| 0.848093048 | 6.44E-08 | 4.82E-12 | 10 | AU019823      |
| 0.474377387 | 6.73E-08 | 5.04E-12 | 10 | Eci1          |
| 0.752978848 | 6.79E-08 | 5.08E-12 | 10 | Wee1          |
| 1.107001391 | 6.99E-08 | 5.23E-12 | 10 | Zrsr2         |
| 0.955985491 | 7.33E-08 | 5.49E-12 | 10 | Osgin2        |
| 1.001530213 | 7.46E-08 | 5.59E-12 | 10 | Vps39         |



|             |          |          |    |               |
|-------------|----------|----------|----|---------------|
| 1.398408354 | 7.49E-08 | 5.61E-12 | 10 | Pdxk          |
| 0.385238363 | 7.67E-08 | 5.75E-12 | 10 | Eid2b         |
| 1.376868375 | 8.44E-08 | 6.32E-12 | 10 | Apoa1bp       |
| 0.926762032 | 8.53E-08 | 6.39E-12 | 10 | Bet1l         |
| 0.977432661 | 8.68E-08 | 6.50E-12 | 10 | Ubqln2        |
| 1.075278265 | 8.86E-08 | 6.63E-12 | 10 | Sec24c        |
| 0.757816246 | 9.12E-08 | 6.83E-12 | 10 | Lamb2         |
| 1.17584944  | 9.13E-08 | 6.84E-12 | 10 | Mrpl37        |
| 0.933294953 | 9.59E-08 | 7.18E-12 | 10 | Keap1         |
| 0.827795541 | 9.84E-08 | 7.37E-12 | 10 | Rrm1          |
| 0.872258904 | 1.06E-07 | 7.92E-12 | 10 | Zfyve19       |
| 0.977561718 | 1.07E-07 | 8.02E-12 | 10 | Ppp2r1b       |
| 1.129463774 | 1.12E-07 | 8.41E-12 | 10 | Irf3          |
| 1.383152449 | 1.20E-07 | 8.97E-12 | 10 | Mrps17        |
| 0.670884938 | 1.22E-07 | 9.14E-12 | 10 | Blmh          |
| 1.197338058 | 1.23E-07 | 9.18E-12 | 10 | Msl3          |
| 1.223527444 | 1.27E-07 | 9.48E-12 | 10 | Ralgds        |
| 0.835075482 | 1.29E-07 | 9.65E-12 | 10 | Coro7         |
| 0.920274247 | 1.30E-07 | 9.73E-12 | 10 | Ino80         |
| 0.84601663  | 1.30E-07 | 9.77E-12 | 10 | Etfdh         |
| 1.129086133 | 1.31E-07 | 9.81E-12 | 10 | Tmem248       |
| 0.622903809 | 1.38E-07 | 1.04E-11 | 10 | Gnl3l         |
| 0.691696115 | 1.43E-07 | 1.07E-11 | 10 | Kdm4b         |
| 0.711008356 | 1.46E-07 | 1.09E-11 | 10 | Zscan26       |
| 0.492974784 | 1.49E-07 | 1.11E-11 | 10 | Mcemp1        |
| 1.241406086 | 1.53E-07 | 1.14E-11 | 10 | Gfpt1         |
| 1.276750301 | 1.53E-07 | 1.14E-11 | 10 | Chchd3        |
| 0.602476641 | 1.64E-07 | 1.23E-11 | 10 | Fam207a       |
| 1.385594557 | 1.72E-07 | 1.29E-11 | 10 | Nfkb2         |
| 0.65389978  | 1.75E-07 | 1.31E-11 | 10 | Pthr2         |
| 1.324729575 | 1.78E-07 | 1.34E-11 | 10 | Pnpla2        |
| 0.72576971  | 1.79E-07 | 1.34E-11 | 10 | Dbf4          |
| 1.077073935 | 1.83E-07 | 1.37E-11 | 10 | Asxl1         |
| 0.871179022 | 1.88E-07 | 1.41E-11 | 10 | Reep4         |
| 0.478016415 | 1.88E-07 | 1.41E-11 | 10 | Mfn2          |
| 1.056036177 | 1.89E-07 | 1.42E-11 | 10 | Cipc          |
| 1.166865457 | 1.91E-07 | 1.43E-11 | 10 | Trap1         |
| 0.911883135 | 2.02E-07 | 1.51E-11 | 10 | Haus2         |
| 0.482921876 | 2.06E-07 | 1.54E-11 | 10 | Coq5          |
| 0.769151579 | 2.08E-07 | 1.56E-11 | 10 | Fem1b         |
| 0.924062975 | 2.14E-07 | 1.61E-11 | 10 | Pcnt          |
| 0.455557201 | 2.15E-07 | 1.61E-11 | 10 | Adck4         |
| 0.937198559 | 2.18E-07 | 1.63E-11 | 10 | Cdc42bpb      |
| 1.461637982 | 2.31E-07 | 1.73E-11 | 10 | Nsmce2        |
| 0.883834236 | 2.40E-07 | 1.80E-11 | 10 | Prps1         |
| 0.928727956 | 2.44E-07 | 1.83E-11 | 10 | Ubqln4        |
| 0.429437006 | 2.47E-07 | 1.85E-11 | 10 | Dcaf17        |
| 0.52206645  | 2.51E-07 | 1.88E-11 | 10 | Slc12a4       |
| 0.459721368 | 2.56E-07 | 1.92E-11 | 10 | Slc41a1       |
| 0.723821188 | 2.64E-07 | 1.97E-11 | 10 | Inpp5a        |
| 0.470028443 | 2.66E-07 | 1.99E-11 | 10 | Snapc2        |
| 1.304139396 | 2.72E-07 | 2.04E-11 | 10 | 9930021J03Rik |
| 1.172640945 | 2.80E-07 | 2.10E-11 | 10 | Lpcat3        |
| 1.157627629 | 2.89E-07 | 2.17E-11 | 10 | Srpr          |
| 0.42691545  | 2.92E-07 | 2.19E-11 | 10 | Pbx3          |
| 0.965065133 | 2.98E-07 | 2.23E-11 | 10 | Tspan2        |
| 0.749550823 | 2.99E-07 | 2.24E-11 | 10 | Narfl         |
| 1.080242961 | 3.09E-07 | 2.31E-11 | 10 | Traf1         |
| 1.145274414 | 3.23E-07 | 2.42E-11 | 10 | Phospho2      |
| 1.235617597 | 3.25E-07 | 2.43E-11 | 10 | Babam1        |
| 0.612787017 | 3.26E-07 | 2.44E-11 | 10 | Trip10        |

|             |          |          |    |               |
|-------------|----------|----------|----|---------------|
| 1.048639979 | 3.27E-07 | 2.45E-11 | 10 | Scd1          |
| 1.094762018 | 3.31E-07 | 2.48E-11 | 10 | Dnajb14       |
| 0.596371152 | 3.33E-07 | 2.49E-11 | 10 | Psmg3         |
| 0.931089872 | 3.48E-07 | 2.60E-11 | 10 | Mthfd2        |
| 0.915947384 | 3.58E-07 | 2.68E-11 | 10 | Katnbl1       |
| 1.177977409 | 3.59E-07 | 2.69E-11 | 10 | Lrp12         |
| 0.917943223 | 3.66E-07 | 2.74E-11 | 10 | Fam20b        |
| 0.557947031 | 3.70E-07 | 2.77E-11 | 10 | Prpf3         |
| 0.877860874 | 3.72E-07 | 2.78E-11 | 10 | Sec16a        |
| 0.964759963 | 3.72E-07 | 2.79E-11 | 10 | Inpp5b        |
| 0.888459274 | 3.76E-07 | 2.81E-11 | 10 | Oxsr1         |
| 0.582964885 | 3.80E-07 | 2.84E-11 | 10 | Ramp3         |
| 0.707307496 | 3.90E-07 | 2.92E-11 | 10 | Smg6          |
| 0.630118596 | 3.96E-07 | 2.97E-11 | 10 | Nfyb          |
| 1.016328621 | 3.97E-07 | 2.98E-11 | 10 | Dnajc4        |
| 0.831147854 | 4.05E-07 | 3.04E-11 | 10 | Fez2          |
| 1.324478775 | 4.11E-07 | 3.08E-11 | 10 | Mrpl17        |
| 0.287382417 | 4.25E-07 | 3.19E-11 | 10 | Kitl          |
| 1.074872798 | 4.28E-07 | 3.21E-11 | 10 | Cdc42ep4      |
| 0.536453948 | 4.33E-07 | 3.24E-11 | 10 | Rab13         |
| 1.315927143 | 4.36E-07 | 3.26E-11 | 10 | Ehd1          |
| 0.828073851 | 4.47E-07 | 3.34E-11 | 10 | Rab5b         |
| 0.646531625 | 4.53E-07 | 3.39E-11 | 10 | Akt3          |
| 1.311682154 | 4.59E-07 | 3.44E-11 | 10 | Mybbp1a       |
| 1.327796052 | 4.64E-07 | 3.48E-11 | 10 | Zfp704        |
| 0.752570601 | 4.72E-07 | 3.53E-11 | 10 | Ints1         |
| 1.342882317 | 4.80E-07 | 3.60E-11 | 10 | Pgs1          |
| 0.402488773 | 5.02E-07 | 3.76E-11 | 10 | Retsat        |
| 0.890732568 | 5.03E-07 | 3.77E-11 | 10 | Scaper        |
| 1.209560941 | 5.47E-07 | 4.09E-11 | 10 | Tmppe         |
| 0.345148226 | 5.48E-07 | 4.11E-11 | 10 | Nod2          |
| 1.081214416 | 5.58E-07 | 4.18E-11 | 10 | Pdzd8         |
| 1.023425621 | 5.65E-07 | 4.23E-11 | 10 | Tusc2         |
| 1.118546898 | 6.41E-07 | 4.80E-11 | 10 | Ahr           |
| 1.297620271 | 6.54E-07 | 4.89E-11 | 10 | Csf2rb        |
| 1.029499349 | 6.62E-07 | 4.96E-11 | 10 | Timp1         |
| 0.585644242 | 6.63E-07 | 4.97E-11 | 10 | Gmn           |
| 0.961373665 | 7.00E-07 | 5.24E-11 | 10 | Slc25a10      |
| 0.781589262 | 7.13E-07 | 5.34E-11 | 10 | Gatad2b       |
| 0.472973069 | 7.13E-07 | 5.34E-11 | 10 | Tyms          |
| 0.848364915 | 7.20E-07 | 5.39E-11 | 10 | Mina          |
| 1.010487985 | 7.23E-07 | 5.41E-11 | 10 | Aebp1         |
| 0.565392243 | 7.50E-07 | 5.62E-11 | 10 | Zwint         |
| 1.002746002 | 8.08E-07 | 6.05E-11 | 10 | Cmc2          |
| 0.665332492 | 8.18E-07 | 6.13E-11 | 10 | Ddb2          |
| 0.360066839 | 8.30E-07 | 6.21E-11 | 10 | Chst14        |
| 0.999009117 | 8.36E-07 | 6.26E-11 | 10 | Osbpl1a       |
| 0.834492458 | 8.37E-07 | 6.27E-11 | 10 | Crat          |
| 1.002646729 | 9.15E-07 | 6.85E-11 | 10 | Suds3         |
| 0.628796478 | 1.00E-06 | 7.50E-11 | 10 | Slc35a1       |
| 0.37819608  | 1.02E-06 | 7.65E-11 | 10 | Engase        |
| 2.170894957 | 1.05E-06 | 7.85E-11 | 10 | Eln           |
| 0.469695984 | 1.06E-06 | 7.92E-11 | 10 | Nme4          |
| 1.040314518 | 1.09E-06 | 8.14E-11 | 10 | Ranbp10       |
| 1.336447888 | 1.09E-06 | 8.16E-11 | 10 | Arl6ip5       |
| 1.051256502 | 1.09E-06 | 8.20E-11 | 10 | Ppil4         |
| 0.698602937 | 1.17E-06 | 8.73E-11 | 10 | Rptor         |
| 1.067578775 | 1.18E-06 | 8.85E-11 | 10 | Ercc1         |
| 0.503775385 | 1.20E-06 | 8.99E-11 | 10 | 6430548M08Rik |
| 0.75734388  | 1.21E-06 | 9.06E-11 | 10 | Ckap5         |
| 1.086792383 | 1.25E-06 | 9.38E-11 | 10 | Srprb         |

|             |          |          |    |               |
|-------------|----------|----------|----|---------------|
| 1.163308613 | 1.27E-06 | 9.48E-11 | 10 | Cd151         |
| 1.181734329 | 1.28E-06 | 9.58E-11 | 10 | Trpc4ap       |
| 0.969187876 | 1.36E-06 | 1.02E-10 | 10 | Prosc         |
| 0.829583376 | 1.38E-06 | 1.03E-10 | 10 | 1700037H04Rik |
| 0.760299838 | 1.40E-06 | 1.05E-10 | 10 | Pop4          |
| 1.097353545 | 1.47E-06 | 1.10E-10 | 10 | Cyhr1         |
| 0.941201444 | 1.48E-06 | 1.11E-10 | 10 | 9030617003Rik |
| 1.23973119  | 1.52E-06 | 1.14E-10 | 10 | Abcc5         |
| 0.44149093  | 1.59E-06 | 1.19E-10 | 10 | Ubiad1        |
| 0.412590364 | 1.62E-06 | 1.21E-10 | 10 | Nmrk1         |
| 1.330453566 | 1.65E-06 | 1.24E-10 | 10 | Il17ra        |
| 0.740268587 | 1.69E-06 | 1.26E-10 | 10 | Msh2          |
| 1.248082981 | 1.72E-06 | 1.29E-10 | 10 | Sbno1         |
| 1.289055578 | 1.76E-06 | 1.32E-10 | 10 | Tbk1          |
| 0.543451966 | 1.88E-06 | 1.41E-10 | 10 | B9d2          |
| 0.476176488 | 1.94E-06 | 1.45E-10 | 10 | Mpp7          |
| 1.323968371 | 1.94E-06 | 1.46E-10 | 10 | Dirc2         |
| 0.453630198 | 1.98E-06 | 1.48E-10 | 10 | Tmed1         |
| 0.947556159 | 2.01E-06 | 1.50E-10 | 10 | D16Ertd472e   |
| 1.108625428 | 2.02E-06 | 1.52E-10 | 10 | Hivep3        |
| 0.873754232 | 2.07E-06 | 1.55E-10 | 10 | Arl13b        |
| 1.15139828  | 2.11E-06 | 1.58E-10 | 10 | Arl5c         |
| 0.409637606 | 2.17E-06 | 1.63E-10 | 10 | Lactb2        |
| 1.152337688 | 2.19E-06 | 1.64E-10 | 10 | Ndufs8        |
| 1.114089443 | 2.26E-06 | 1.69E-10 | 10 | Dap3          |
| 0.699479899 | 2.36E-06 | 1.77E-10 | 10 | Cryab         |
| 0.672318601 | 2.37E-06 | 1.78E-10 | 10 | Zfp346        |
| 1.05789717  | 2.53E-06 | 1.90E-10 | 10 | Rab22a        |
| 0.929171464 | 2.54E-06 | 1.90E-10 | 10 | Tbc1d13       |
| 1.13265595  | 2.57E-06 | 1.92E-10 | 10 | Ubn1          |
| 0.832313431 | 2.62E-06 | 1.96E-10 | 10 | Bckdk         |
| 1.212182513 | 2.67E-06 | 2.00E-10 | 10 | Pik3r1        |
| 0.593820799 | 2.68E-06 | 2.01E-10 | 10 | Tcp11l1       |
| 1.097705181 | 2.72E-06 | 2.04E-10 | 10 | Tmem259       |
| 0.976706708 | 2.77E-06 | 2.07E-10 | 10 | Ercc6         |
| 0.792741841 | 2.79E-06 | 2.09E-10 | 10 | Nf2           |
| 1.265849582 | 2.81E-06 | 2.10E-10 | 10 | Eif2s3y       |
| 1.042834203 | 2.95E-06 | 2.21E-10 | 10 | Mrpl55        |
| 1.293477221 | 2.99E-06 | 2.24E-10 | 10 | Gtpbp4        |
| 0.313083011 | 3.12E-06 | 2.34E-10 | 10 | Cdc42ep3      |
| 1.147642101 | 3.16E-06 | 2.37E-10 | 10 | Sae1          |
| 0.800694321 | 3.17E-06 | 2.37E-10 | 10 | Zc3h12d       |
| 1.451209193 | 3.18E-06 | 2.38E-10 | 10 | Tgfbra1       |
| 0.993069711 | 3.32E-06 | 2.49E-10 | 10 | Polr1c        |
| 0.372535563 | 3.33E-06 | 2.50E-10 | 10 | Rnf167        |
| 0.778862593 | 3.35E-06 | 2.51E-10 | 10 | Cdc27         |
| 0.65442472  | 3.35E-06 | 2.51E-10 | 10 | Lsm14b        |
| 0.753531447 | 3.42E-06 | 2.56E-10 | 10 | Fbxl20        |
| 0.943865508 | 3.42E-06 | 2.56E-10 | 10 | Pom121        |
| 1.114649167 | 3.57E-06 | 2.68E-10 | 10 | Hck           |
| 1.039462841 | 3.59E-06 | 2.69E-10 | 10 | Trim27        |
| 0.691416007 | 3.65E-06 | 2.74E-10 | 10 | Med17         |
| 0.977625681 | 3.79E-06 | 2.84E-10 | 10 | Zfp281        |
| 0.375123881 | 3.84E-06 | 2.88E-10 | 10 | Arhgap19      |
| 0.862454676 | 3.88E-06 | 2.91E-10 | 10 | Itgb1bp1      |
| 0.384316466 | 4.03E-06 | 3.02E-10 | 10 | Top3a         |
| 0.683695731 | 4.13E-06 | 3.09E-10 | 10 | Fbxw2         |
| 0.569702546 | 4.21E-06 | 3.15E-10 | 10 | Sp2           |
| 0.535551891 | 4.22E-06 | 3.16E-10 | 10 | Lzts2         |
| 1.651404327 | 4.29E-06 | 3.21E-10 | 10 | Ogfr          |
| 0.843633038 | 4.52E-06 | 3.39E-10 | 10 | Xpnpep1       |

|             |          |          |    |               |
|-------------|----------|----------|----|---------------|
| 0.368330377 | 4.59E-06 | 3.44E-10 | 10 | Nde1          |
| 0.815301545 | 4.70E-06 | 3.52E-10 | 10 | Esrra         |
| 0.758013538 | 4.77E-06 | 3.57E-10 | 10 | Ampd2         |
| 0.683071529 | 4.80E-06 | 3.60E-10 | 10 | Nckipsd       |
| 1.170488121 | 5.04E-06 | 3.77E-10 | 10 | Cyc1          |
| 0.795798035 | 5.22E-06 | 3.91E-10 | 10 | Srp68         |
| 1.287246107 | 5.25E-06 | 3.93E-10 | 10 | Surf2         |
| 0.885448225 | 5.39E-06 | 4.04E-10 | 10 | Specc1l       |
| 1.154070572 | 5.52E-06 | 4.14E-10 | 10 | Odc1          |
| 1.113740945 | 5.74E-06 | 4.30E-10 | 10 | Ubr3          |
| 0.569087587 | 5.86E-06 | 4.39E-10 | 10 | Tusc1         |
| 0.529114677 | 5.89E-06 | 4.41E-10 | 10 | Eya3          |
| 1.17498025  | 5.95E-06 | 4.45E-10 | 10 | Ccng1         |
| 0.436382362 | 5.97E-06 | 4.47E-10 | 10 | Cks2          |
| 1.044367841 | 6.02E-06 | 4.51E-10 | 10 | Kdm5a         |
| 0.350296242 | 6.05E-06 | 4.53E-10 | 10 | Stat5a        |
| 0.649068412 | 6.10E-06 | 4.57E-10 | 10 | Extl2         |
| 1.308085538 | 6.12E-06 | 4.58E-10 | 10 | Il1r2         |
| 0.861781059 | 6.18E-06 | 4.63E-10 | 10 | Tbc1d1        |
| 1.155990911 | 6.20E-06 | 4.64E-10 | 10 | Stx3          |
| 0.701174468 | 6.23E-06 | 4.67E-10 | 10 | Fbxo28        |
| 0.761877708 | 6.30E-06 | 4.72E-10 | 10 | Sdccag8       |
| 0.378566519 | 6.33E-06 | 4.74E-10 | 10 | Rrp9          |
| 0.766936956 | 6.45E-06 | 4.83E-10 | 10 | Zcchc17       |
| 0.403980197 | 6.53E-06 | 4.89E-10 | 10 | CntlIn        |
| 0.405224752 | 6.64E-06 | 4.97E-10 | 10 | Kin           |
| 0.472666033 | 6.68E-06 | 5.00E-10 | 10 | Ltn1          |
| 0.664279431 | 6.73E-06 | 5.04E-10 | 10 | Pik3ap1       |
| 0.766971963 | 6.80E-06 | 5.09E-10 | 10 | Ptgr1         |
| 0.935196244 | 6.89E-06 | 5.16E-10 | 10 | Med1          |
| 1.07380876  | 6.95E-06 | 5.20E-10 | 10 | Actn4         |
| 0.361561019 | 7.21E-06 | 5.40E-10 | 10 | Chil3         |
| 1.149195689 | 7.24E-06 | 5.42E-10 | 10 | Eif3l         |
| 1.006230192 | 7.35E-06 | 5.50E-10 | 10 | Ptrf          |
| 0.643230573 | 7.36E-06 | 5.51E-10 | 10 | Pigyl         |
| 1.138485092 | 7.41E-06 | 5.55E-10 | 10 | Lxn           |
| 0.345590606 | 7.65E-06 | 5.73E-10 | 10 | Zfp738        |
| 0.742391294 | 7.72E-06 | 5.78E-10 | 10 | 5730409E04Rik |
| 0.72029983  | 8.44E-06 | 6.32E-10 | 10 | Ing1          |
| 0.599134559 | 8.59E-06 | 6.43E-10 | 10 | Nelfe         |
| 0.578721543 | 8.74E-06 | 6.55E-10 | 10 | Bcl2l13       |
| 0.732802771 | 8.87E-06 | 6.64E-10 | 10 | Il1a          |
| 1.187226463 | 9.38E-06 | 7.03E-10 | 10 | Traf3         |
| 0.962679935 | 9.78E-06 | 7.32E-10 | 10 | Snx4          |
| 1.153115859 | 9.80E-06 | 7.34E-10 | 10 | Copb2         |
| 0.253621345 | 1.01E-05 | 7.60E-10 | 10 | Pla2g12a      |
| 0.351878772 | 1.05E-05 | 7.88E-10 | 10 | Mib1          |
| 1.213473454 | 1.06E-05 | 7.91E-10 | 10 | Exoc5         |
| 0.571780829 | 1.13E-05 | 8.50E-10 | 10 | Smtn          |
| 0.702927981 | 1.16E-05 | 8.71E-10 | 10 | Snx24         |
| 0.460446083 | 1.18E-05 | 8.80E-10 | 10 | Ylpm1         |
| 0.468363949 | 1.18E-05 | 8.82E-10 | 10 | Mta1          |
| 0.407077634 | 1.19E-05 | 8.89E-10 | 10 | Mir6516       |
| 0.575538985 | 1.26E-05 | 9.44E-10 | 10 | Med25         |
| 1.085858879 | 1.26E-05 | 9.46E-10 | 10 | Rbm18         |
| 1.033446425 | 1.26E-05 | 9.47E-10 | 10 | Zfp655        |
| 1.132264401 | 1.30E-05 | 9.71E-10 | 10 | Timm17a       |
| 0.736375915 | 1.32E-05 | 9.86E-10 | 10 | Cd276         |
| 0.534337043 | 1.35E-05 | 1.01E-09 | 10 | Fam65a        |
| 0.900437536 | 1.35E-05 | 1.01E-09 | 10 | Tnp03         |
| 0.921076236 | 1.35E-05 | 1.01E-09 | 10 | Arid3a        |

|              |          |          |    |          |
|--------------|----------|----------|----|----------|
| 0.761475263  | 1.38E-05 | 1.03E-09 | 10 | Skiv2l2  |
| 1.016366928  | 1.39E-05 | 1.04E-09 | 10 | Mea1     |
| 0.476845161  | 1.40E-05 | 1.05E-09 | 10 | Ogn      |
| 0.665487118  | 1.43E-05 | 1.07E-09 | 10 | Rab10os  |
| 0.472506759  | 1.45E-05 | 1.08E-09 | 10 | Wdyhv1   |
| 0.992273155  | 1.51E-05 | 1.13E-09 | 10 | Piezo1   |
| 0.961022096  | 1.52E-05 | 1.14E-09 | 10 | Trim26   |
| 0.693105375  | 1.64E-05 | 1.23E-09 | 10 | Fert2    |
| 0.474195636  | 1.70E-05 | 1.27E-09 | 10 | Arg2     |
| 0.709694161  | 1.72E-05 | 1.29E-09 | 10 | Ss18     |
| 0.517291578  | 1.75E-05 | 1.31E-09 | 10 | Gm5801   |
| 0.661631862  | 1.75E-05 | 1.31E-09 | 10 | Dtymk    |
| 0.734138691  | 1.76E-05 | 1.31E-09 | 10 | Bzw2     |
| 0.626207698  | 1.81E-05 | 1.36E-09 | 10 | Frs2     |
| 0.857071663  | 1.83E-05 | 1.37E-09 | 10 | Prkch    |
| 1.238833354  | 1.83E-05 | 1.37E-09 | 10 | Hsd17b10 |
| 1.121538992  | 1.85E-05 | 1.38E-09 | 10 | Tns1     |
| 0.85789918   | 1.89E-05 | 1.42E-09 | 10 | Kifap3   |
| 0.4802617    | 1.90E-05 | 1.43E-09 | 10 | Saysd1   |
| 0.467524188  | 1.91E-05 | 1.43E-09 | 10 | Clcn5    |
| 0.663620386  | 1.91E-05 | 1.43E-09 | 10 | Ero1lb   |
| 0.53536865   | 1.94E-05 | 1.45E-09 | 10 | Slc25a19 |
| 1.090400099  | 1.99E-05 | 1.49E-09 | 10 | Tnip3    |
| 1.056760837  | 2.06E-05 | 1.54E-09 | 10 | Cd8b1    |
| 1.105244812  | 2.06E-05 | 1.55E-09 | 10 | Med15    |
| 0.40611467   | 2.07E-05 | 1.55E-09 | 10 | Prkag2   |
| 1.622254254  | 2.07E-05 | 1.55E-09 | 10 | Herc2    |
| 0.293528188  | 2.08E-05 | 1.56E-09 | 10 | Met      |
| 0.895624283  | 2.15E-05 | 1.61E-09 | 10 | Atf2     |
| 1.185269513  | 2.18E-05 | 1.63E-09 | 10 | Lnpep    |
| 0.421213465  | 2.19E-05 | 1.64E-09 | 10 | Stxbp1   |
| 0.691253768  | 2.24E-05 | 1.67E-09 | 10 | Prr14    |
| 0.890490287  | 2.27E-05 | 1.70E-09 | 10 | Cetn2    |
| 0.69562277   | 2.27E-05 | 1.70E-09 | 10 | Erlec1   |
| 0.844384337  | 2.30E-05 | 1.72E-09 | 10 | Slc25a46 |
| 0.793245432  | 2.34E-05 | 1.75E-09 | 10 | Naf1     |
| 0.640664925  | 2.36E-05 | 1.77E-09 | 10 | Ccdc174  |
| 0.845036091  | 2.39E-05 | 1.79E-09 | 10 | Dnajc21  |
| 0.375618759  | 2.39E-05 | 1.79E-09 | 10 | Pdpf     |
| 1.014588116  | 2.42E-05 | 1.81E-09 | 10 | N4bp2l2  |
| -0.760096118 | 2.43E-05 | 1.82E-09 | 10 | Tmsb4x   |
| 0.9604117    | 2.44E-05 | 1.82E-09 | 10 | Plxnc1   |
| 0.475937397  | 2.44E-05 | 1.83E-09 | 10 | Lrpprc   |
| 0.528757703  | 2.49E-05 | 1.86E-09 | 10 | Rlf      |
| 0.964060543  | 2.59E-05 | 1.94E-09 | 10 | Rps6ka3  |
| 0.412468483  | 2.74E-05 | 2.05E-09 | 10 | Enoph1   |
| 0.364950853  | 2.79E-05 | 2.09E-09 | 10 | B3gat3   |
| 0.352316632  | 2.79E-05 | 2.09E-09 | 10 | Fto      |
| 0.717753741  | 2.82E-05 | 2.11E-09 | 10 | Pagr1a   |
| 0.885367257  | 2.83E-05 | 2.12E-09 | 10 | Cdk12    |
| 1.119759954  | 2.87E-05 | 2.15E-09 | 10 | St3gal1  |
| 0.544329377  | 2.91E-05 | 2.18E-09 | 10 | Katna1   |
| 0.724683211  | 2.91E-05 | 2.18E-09 | 10 | Hbegf    |
| 0.883888701  | 2.97E-05 | 2.22E-09 | 10 | Cgrrf1   |
| 0.737323007  | 3.02E-05 | 2.26E-09 | 10 | Lage3    |
| 0.957891377  | 3.02E-05 | 2.27E-09 | 10 | Oxct1    |
| 0.762319862  | 3.06E-05 | 2.29E-09 | 10 | Exosc8   |
| 0.883077347  | 3.09E-05 | 2.32E-09 | 10 | Batf     |
| 1.012835546  | 3.13E-05 | 2.34E-09 | 10 | Map2k3   |
| 0.796003711  | 3.20E-05 | 2.40E-09 | 10 | Ankle2   |
| 0.597952162  | 3.21E-05 | 2.41E-09 | 10 | Nfatc3   |

|             |             |          |    |               |
|-------------|-------------|----------|----|---------------|
| 0.816562976 | 3.31E-05    | 2.48E-09 | 10 | Pyurf         |
| 0.624993822 | 3.36E-05    | 2.52E-09 | 10 | Ccndbp1       |
| 0.719122667 | 3.43E-05    | 2.57E-09 | 10 | Exo5          |
| 1.224402258 | 3.44E-05    | 2.57E-09 | 10 | 2310035C23Rik |
| 0.716625787 | 3.48E-05    | 2.60E-09 | 10 | Mrps33        |
| 0.825746607 | 3.57E-05    | 2.67E-09 | 10 | Cyth3         |
| 1.00809497  | 3.69E-05    | 2.76E-09 | 10 | Rangap1       |
| 0.980753    | 3.70E-05    | 2.77E-09 | 10 | Sppl3         |
| 0.728415714 | 3.75E-05    | 2.81E-09 | 10 | Ccdc127       |
| 0.493017404 | 3.82E-05    | 2.86E-09 | 10 | Hnrnpul1      |
| 0.987936255 | 3.91E-05    | 2.93E-09 | 10 | Kmt2b         |
| 1.120182009 | 3.97E-05    | 2.98E-09 | 10 | Itga6         |
| 1.031961296 | 4.04E-05    | 3.02E-09 | 10 | Hadha         |
| 1.045866261 | 4.07E-05    | 3.05E-09 | 10 | Rexo4         |
| 1.058585482 | 4.11E-05    | 3.08E-09 | 10 | Plcb2         |
| 1.089254187 | 4.21E-05    | 3.15E-09 | 10 | Commmd1       |
| 1.031149311 | 4.33E-05    | 3.24E-09 | 10 | Sntb2         |
| 0.759272041 | 4.52E-05    | 3.38E-09 | 10 | Luc7l         |
| 0.926889713 | 4.55E-05    | 3.41E-09 | 10 | Mmp19         |
| 0.972212637 | 4.76E-05    | 3.57E-09 | 10 | Magt1         |
| 0.967675028 | 4.90E-05    | 3.67E-09 | 10 | Pqbp1         |
| 0.817324956 | 4.97E-05    | 3.72E-09 | 10 | Ift46         |
| 0.625052926 | 4.97E-05    | 3.72E-09 | 10 | Lrmp          |
| 0.5453118   | 5.24E-05    | 3.92E-09 | 10 | Ipo8          |
| 0.79551865  | 5.30E-05    | 3.97E-09 | 10 | Rps6ka4       |
| 0.262768758 | 5.39E-05    | 4.03E-09 | 10 | Dus1l         |
| 0.925579299 | 5.78E-05    | 4.33E-09 | 10 | Commmd9       |
| 0.656898212 | 5.83E-05    | 4.37E-09 | 10 | Timm50        |
| 0.857567047 | 6.13E-05    | 4.59E-09 | 10 | Zc3h12a       |
| 0.498717236 | 6.26E-05    | 4.69E-09 | 10 | Mnat1         |
| 0.763858561 | 6.29E-05    | 4.71E-09 | 10 | Abhd5         |
| 0.900304097 | 6.48E-05    | 4.85E-09 | 10 | Stk38         |
| 0.983454491 | 6.49E-05    | 4.86E-09 | 10 | Dnajc13       |
| 0.309025447 | 6.95E-05    | 5.20E-09 | 10 | 2410004B18Rik |
| 0.446361137 | 6.95E-05    | 5.21E-09 | 10 | Rcan3         |
| 0.938353531 | 7.03E-05    | 5.26E-09 | 10 | Mknk2         |
| 0.903684494 | 7.05E-05    | 5.28E-09 | 10 | Sptlc2        |
| 0.906470025 | 7.13E-05    | 5.34E-09 | 10 | Ubr4          |
| 0.657598796 | 7.26E-05    | 5.44E-09 | 10 | Nek6          |
| 0.605484462 | 7.93E-05    | 5.94E-09 | 10 | Vcl           |
| 0.745547895 | 8.06E-05    | 6.04E-09 | 10 | Sf3b4         |
| 0.896456682 | 8.16E-05    | 6.11E-09 | 10 | Bcl2a1d       |
| 0.755828778 | 8.20E-05    | 6.14E-09 | 10 | 2310009A05Rik |
| 0.755171383 | 8.21E-05    | 6.15E-09 | 10 | Lactb         |
| 0.696921957 | 8.42E-05    | 6.31E-09 | 10 | Sacm1l        |
| 0.977859689 | 8.64E-05    | 6.47E-09 | 10 | Ndrp1         |
| 0.439058825 | 8.76E-05    | 6.56E-09 | 10 | Vrk1          |
| 0.553954189 | 8.78E-05    | 6.57E-09 | 10 | Lmnb1         |
| 1.143669277 | 8.78E-05    | 6.58E-09 | 10 | Anp32e        |
| 0.976934058 | 9.01E-05    | 6.75E-09 | 10 | Srsf11        |
| 0.910973726 | 9.15E-05    | 6.85E-09 | 10 | Zmiz2         |
| 0.495306265 | 9.56E-05    | 7.16E-09 | 10 | Tmc6          |
| 0.853083797 | 9.68E-05    | 7.25E-09 | 10 | Rab32         |
| 0.989528562 | 9.72E-05    | 7.28E-09 | 10 | Arpc5l        |
| 0.814120396 | 9.74E-05    | 7.30E-09 | 10 | Rpl10         |
| 1.065915097 | 9.94E-05    | 7.44E-09 | 10 | Trappc2l      |
| 0.684483682 | 0.00010022  | 7.51E-09 | 10 | Hltf          |
| 0.851750309 | 0.000102033 | 7.64E-09 | 10 | Sgsm2         |
| 1.034352203 | 0.000102798 | 7.70E-09 | 10 | Slc38a1       |
| 0.795942174 | 0.000103334 | 7.74E-09 | 10 | Filip1l       |
| 1.017323123 | 0.000104469 | 7.82E-09 | 10 | Cib1          |

|             |             |          |    |               |
|-------------|-------------|----------|----|---------------|
| 0.870298803 | 0.000104857 | 7.85E-09 | 10 | Ccr2          |
| 0.328771197 | 0.000105325 | 7.89E-09 | 10 | Hcfc2         |
| 0.750061189 | 0.000108525 | 8.13E-09 | 10 | Gpaa1         |
| 1.015212911 | 0.000110226 | 8.26E-09 | 10 | Tnfsf9        |
| 0.583907162 | 0.000110492 | 8.28E-09 | 10 | Sart3         |
| 0.806529379 | 0.000110942 | 8.31E-09 | 10 | Ino80c        |
| 0.365838296 | 0.000112593 | 8.43E-09 | 10 | Orc3          |
| 0.329943301 | 0.000114128 | 8.55E-09 | 10 | Fam173b       |
| 0.474136088 | 0.000114332 | 8.56E-09 | 10 | Grasp         |
| 0.518503626 | 0.000116353 | 8.71E-09 | 10 | 9130023H24Rik |
| 0.506552054 | 0.000117329 | 8.79E-09 | 10 | Sec22b        |
| 0.8201482   | 0.000118492 | 8.87E-09 | 10 | Rnasel        |
| 0.40056199  | 0.000122369 | 9.16E-09 | 10 | Gm14005       |
| 0.988179896 | 0.000125368 | 9.39E-09 | 10 | Ano6          |
| 0.529269064 | 0.000126801 | 9.50E-09 | 10 | Nifk          |
| 0.839536151 | 0.000127288 | 9.53E-09 | 10 | Nxf1          |
| 0.431684765 | 0.000135281 | 1.01E-08 | 10 | Ccdc84        |
| 0.547535603 | 0.000136047 | 1.02E-08 | 10 | Kdm3b         |
| 0.595508711 | 0.000136102 | 1.02E-08 | 10 | Gpn3          |
| 0.971280474 | 0.000137499 | 1.03E-08 | 10 | Mllt6         |
| 0.98419005  | 0.000139816 | 1.05E-08 | 10 | Plekha1       |
| 0.777016645 | 0.000140231 | 1.05E-08 | 10 | Knop1         |
| 0.425419904 | 0.000140501 | 1.05E-08 | 10 | Abcd4         |
| 0.681398489 | 0.000141192 | 1.06E-08 | 10 | Scamp1        |
| 0.897595707 | 0.000141999 | 1.06E-08 | 10 | Pak1          |
| 0.604740469 | 0.000142223 | 1.07E-08 | 10 | Cish          |
| 0.90477982  | 0.000144041 | 1.08E-08 | 10 | Pcf11         |
| 0.458034727 | 0.000144475 | 1.08E-08 | 10 | Nvl           |
| 0.458907836 | 0.000145652 | 1.09E-08 | 10 | Zbtb1         |
| 1.02281622  | 0.00014723  | 1.10E-08 | 10 | Yif1b         |
| 1.013847022 | 0.000152031 | 1.14E-08 | 10 | Trex1         |
| 0.879291419 | 0.000153969 | 1.15E-08 | 10 | Utp3          |
| 0.431050046 | 0.000155912 | 1.17E-08 | 10 | Cep164        |
| 0.727614503 | 0.000156612 | 1.17E-08 | 10 | Epb4.1        |
| 0.661670493 | 0.000156641 | 1.17E-08 | 10 | Trim33        |
| 0.373761483 | 0.000158432 | 1.19E-08 | 10 | Sik3          |
| 0.59119094  | 0.00016114  | 1.21E-08 | 10 | Arhgef7       |
| 0.92948505  | 0.000161489 | 1.21E-08 | 10 | Ufc1          |
| 0.641004888 | 0.000164627 | 1.23E-08 | 10 | Eif2a         |
| 1.750579214 | 0.000166713 | 1.25E-08 | 10 | Igfbp7        |
| 0.711894964 | 0.000169256 | 1.27E-08 | 10 | Camk2d        |
| 0.487310911 | 0.000170548 | 1.28E-08 | 10 | Wdr75         |
| 0.931565479 | 0.000173954 | 1.30E-08 | 10 | Thoc2         |
| 0.579988012 | 0.000174929 | 1.31E-08 | 10 | Smim20        |
| 0.895550327 | 0.00017666  | 1.32E-08 | 10 | Il2rg         |
| 0.661443555 | 0.000179347 | 1.34E-08 | 10 | Gemin2        |
| 0.919036073 | 0.000180569 | 1.35E-08 | 10 | Zak           |
| 0.591327032 | 0.00018178  | 1.36E-08 | 10 | Patl1         |
| 0.516181823 | 0.000182192 | 1.36E-08 | 10 | Zdhhc18       |
| 0.556109457 | 0.000184711 | 1.38E-08 | 10 | Sin3a         |
| 1.099937361 | 0.000193311 | 1.45E-08 | 10 | Snx27         |
| 0.630162686 | 0.000194544 | 1.46E-08 | 10 | Rnf146        |
| 0.406915052 | 0.00019634  | 1.47E-08 | 10 | Drosha        |
| 0.839773617 | 0.000197223 | 1.48E-08 | 10 | Crk           |
| 0.396210477 | 0.000200901 | 1.50E-08 | 10 | Zfp945        |
| 0.756955123 | 0.000207434 | 1.55E-08 | 10 | Ube4b         |
| 0.909966675 | 0.000207508 | 1.55E-08 | 10 | Scd2          |
| 0.433004316 | 0.000209979 | 1.57E-08 | 10 | 9430008C03Rik |
| 0.515967023 | 0.000212866 | 1.59E-08 | 10 | Scyl2         |
| 0.662570497 | 0.000213696 | 1.60E-08 | 10 | Stmn1         |
| 0.468023038 | 0.000222599 | 1.67E-08 | 10 | Mrps30        |

|              |             |          |    |               |
|--------------|-------------|----------|----|---------------|
| 0.588626178  | 0.00022385  | 1.68E-08 | 10 | Klhl24        |
| 0.591245818  | 0.000225835 | 1.69E-08 | 10 | Gimap5        |
| 0.856527096  | 0.000230499 | 1.73E-08 | 10 | Tfg           |
| 0.98028867   | 0.000231975 | 1.74E-08 | 10 | Aldh3b1       |
| 0.864169307  | 0.000237224 | 1.78E-08 | 10 | Cd93          |
| 0.961483789  | 0.00024447  | 1.83E-08 | 10 | Mrps15        |
| 0.78076683   | 0.000245881 | 1.84E-08 | 10 | Vegfb         |
| 0.975315257  | 0.000246291 | 1.84E-08 | 10 | Casp4         |
| 0.948859166  | 0.00024824  | 1.86E-08 | 10 | Cnot1         |
| 0.963093306  | 0.000254038 | 1.90E-08 | 10 | Ppp6r3        |
| 0.554228512  | 0.00026078  | 1.95E-08 | 10 | Rnaseh2a      |
| 0.886078455  | 0.000265134 | 1.99E-08 | 10 | Tcirg1        |
| 0.417517699  | 0.000267098 | 2.00E-08 | 10 | Brd9          |
| 0.818473359  | 0.000273103 | 2.05E-08 | 10 | Trim28        |
| 0.75934388   | 0.000276629 | 2.07E-08 | 10 | Fam175b       |
| 0.623904134  | 0.000277261 | 2.08E-08 | 10 | Ppa1          |
| 0.693808048  | 0.000284735 | 2.13E-08 | 10 | Parp14        |
| 0.513232364  | 0.000287972 | 2.16E-08 | 10 | 2310009B15Rik |
| 0.741566534  | 0.000288635 | 2.16E-08 | 10 | Ahsa2         |
| 0.597549355  | 0.000289176 | 2.17E-08 | 10 | Trim16        |
| 0.567215882  | 0.000293108 | 2.20E-08 | 10 | Snhg12        |
| 1.082787811  | 0.000305924 | 2.29E-08 | 10 | Pqlc1         |
| 0.783994577  | 0.000307005 | 2.30E-08 | 10 | Tmem51        |
| 0.387186141  | 0.000308763 | 2.31E-08 | 10 | Ino80e        |
| 0.393873893  | 0.000313553 | 2.35E-08 | 10 | Bloc1s6       |
| 0.69932004   | 0.000316306 | 2.37E-08 | 10 | Fam110a       |
| 0.802040439  | 0.000320124 | 2.40E-08 | 10 | Brpf1         |
| 0.334710968  | 0.000322511 | 2.42E-08 | 10 | Crls1         |
| 1.190869976  | 0.000324568 | 2.43E-08 | 10 | Msra          |
| 0.340730138  | 0.000324877 | 2.43E-08 | 10 | Lymr2         |
| 0.980600696  | 0.000331304 | 2.48E-08 | 10 | Dars          |
| 0.962156114  | 0.000349476 | 2.62E-08 | 10 | Scarb2        |
| 0.973868057  | 0.000349604 | 2.62E-08 | 10 | Il1rn         |
| 0.969665192  | 0.000349689 | 2.62E-08 | 10 | Pnp           |
| 1.094142301  | 0.000352995 | 2.64E-08 | 10 | Prkx          |
| 0.397341146  | 0.000355828 | 2.66E-08 | 10 | Htt           |
| 0.315353912  | 0.000357187 | 2.68E-08 | 10 | Zfp513        |
| 0.909403446  | 0.000365971 | 2.74E-08 | 10 | Got1          |
| 0.722764749  | 0.000372886 | 2.79E-08 | 10 | Snx8          |
| 0.969384752  | 0.000379776 | 2.84E-08 | 10 | Entpd1        |
| 0.947051957  | 0.000381902 | 2.86E-08 | 10 | Kdm1a         |
| 0.892327492  | 0.000382443 | 2.86E-08 | 10 | Cebpz         |
| 0.726009069  | 0.00038757  | 2.90E-08 | 10 | Fech          |
| 0.717165125  | 0.000390919 | 2.93E-08 | 10 | Nkiras2       |
| 0.955632848  | 0.000403084 | 3.02E-08 | 10 | Copa          |
| 0.639920802  | 0.000404812 | 3.03E-08 | 10 | AW112010      |
| 0.960843431  | 0.000408208 | 3.06E-08 | 10 | H2afv         |
| 0.293352293  | 0.000410264 | 3.07E-08 | 10 | Zbtb16        |
| 1.010024692  | 0.000414031 | 3.10E-08 | 10 | Rbbp6         |
| 0.508957711  | 0.000414381 | 3.10E-08 | 10 | Terf2         |
| 0.632560493  | 0.00041538  | 3.11E-08 | 10 | Faf1          |
| 0.572877167  | 0.000418767 | 3.14E-08 | 10 | Rpl31         |
| 0.975456047  | 0.000432611 | 3.24E-08 | 10 | Cog7          |
| 0.520837787  | 0.000441478 | 3.31E-08 | 10 | Dhx36         |
| -1.773393843 | 0.000445121 | 3.33E-08 | 10 | Rpl37a        |
| 0.628864305  | 0.00044589  | 3.34E-08 | 10 | Mak16         |
| 0.762907176  | 0.000447823 | 3.35E-08 | 10 | Cdk4          |
| 0.94775498   | 0.000456791 | 3.42E-08 | 10 | Mknk1         |
| 0.720577213  | 0.000457262 | 3.42E-08 | 10 | Dpf2          |
| 0.452970041  | 0.000458092 | 3.43E-08 | 10 | Dtx3l         |
| 0.90501131   | 0.000459359 | 3.44E-08 | 10 | Eif1a         |



|             |             |          |    |               |
|-------------|-------------|----------|----|---------------|
| 0.342066559 | 0.000463139 | 3.47E-08 | 10 | Nedd9         |
| 0.414961274 | 0.00046814  | 3.51E-08 | 10 | Gpr89         |
| 0.543913976 | 0.000470382 | 3.52E-08 | 10 | Mogs          |
| 0.841384993 | 0.000471344 | 3.53E-08 | 10 | Chsy1         |
| 0.815776341 | 0.000477176 | 3.57E-08 | 10 | Ict1          |
| 0.709831548 | 0.000487748 | 3.65E-08 | 10 | 2310045N01Rik |
| 0.535773678 | 0.00048793  | 3.65E-08 | 10 | Gtf2f2        |
| 1.028709575 | 0.000492825 | 3.69E-08 | 10 | Agap1         |
| 0.611449738 | 0.000495526 | 3.71E-08 | 10 | Ppp3cb        |
| 0.801497638 | 0.000495871 | 3.71E-08 | 10 | Ap2a2         |
| 0.717266283 | 0.000500383 | 3.75E-08 | 10 | Stat1         |
| 0.496353517 | 0.000525171 | 3.93E-08 | 10 | Xpo6          |
| 0.442358024 | 0.000532486 | 3.99E-08 | 10 | Arhgap35      |
| 0.775899183 | 0.000536841 | 4.02E-08 | 10 | Ranbp2        |
| 0.35483473  | 0.000538213 | 4.03E-08 | 10 | E230008N13Rik |
| 0.956236007 | 0.000539258 | 4.04E-08 | 10 | Riok1         |
| 0.853782516 | 0.00053986  | 4.04E-08 | 10 | Xbp1          |
| 0.455843071 | 0.000546596 | 4.09E-08 | 10 | Map2k7        |
| 0.389476395 | 0.000563971 | 4.22E-08 | 10 | Map3k3        |
| 0.659282667 | 0.00056654  | 4.24E-08 | 10 | Ppfibp1       |
| 0.685884916 | 0.000566755 | 4.24E-08 | 10 | Pigf          |
| 0.793259342 | 0.000574604 | 4.30E-08 | 10 | Rbm45         |
| 0.325151938 | 0.000575575 | 4.31E-08 | 10 | Cstf3         |
| 0.586718363 | 0.000575695 | 4.31E-08 | 10 | Timm22        |
| 0.511364034 | 0.000579281 | 4.34E-08 | 10 | Ms4a4c        |
| 0.496201363 | 0.000592747 | 4.44E-08 | 10 | Tmem222       |
| 0.670332503 | 0.000594595 | 4.45E-08 | 10 | Heatr3        |
| 1.041685004 | 0.000599789 | 4.49E-08 | 10 | Acp5          |
| 0.871568071 | 0.000600362 | 4.50E-08 | 10 | Edem1         |
| 0.71775996  | 0.000603248 | 4.52E-08 | 10 | Odf2          |
| 0.942266218 | 0.0006054   | 4.53E-08 | 10 | Dnajc15       |
| 0.585560638 | 0.000608124 | 4.55E-08 | 10 | Sharpin       |
| 0.6138417   | 0.000608666 | 4.56E-08 | 10 | Ckap4         |
| 0.914948794 | 0.000616542 | 4.62E-08 | 10 | Rc3h1         |
| 0.855959927 | 0.000617831 | 4.63E-08 | 10 | Phf23         |
| 0.582949171 | 0.00062089  | 4.65E-08 | 10 | Tet2          |
| 0.47071278  | 0.00062395  | 4.67E-08 | 10 | 9130401M01Rik |
| 0.929450694 | 0.000639388 | 4.79E-08 | 10 | Uqcrfs1       |
| 0.688414362 | 0.000645187 | 4.83E-08 | 10 | Srrt          |
| 0.417657345 | 0.000652688 | 4.89E-08 | 10 | Pno1          |
| 0.832375883 | 0.000656974 | 4.92E-08 | 10 | Azi2          |
| 0.603077251 | 0.0006574   | 4.92E-08 | 10 | B230219D22Rik |
| 0.453516909 | 0.000660107 | 4.94E-08 | 10 | Wdr7          |
| 0.604494208 | 0.00068584  | 5.14E-08 | 10 | Mrpl46        |
| 0.639777318 | 0.000689605 | 5.16E-08 | 10 | Zdhhc5        |
| 1.087553048 | 0.000691641 | 5.18E-08 | 10 | Atp13a2       |
| 0.544861027 | 0.000710136 | 5.32E-08 | 10 | Gtf3c2        |
| 0.746063664 | 0.000716155 | 5.36E-08 | 10 | Ppfia1        |
| 0.431385286 | 0.000726782 | 5.44E-08 | 10 | Acbd6         |
| 0.777613936 | 0.000739201 | 5.54E-08 | 10 | 2210016F16Rik |
| 0.296497939 | 0.000740483 | 5.55E-08 | 10 | Hirip3        |
| 0.309455872 | 0.00077901  | 5.83E-08 | 10 | Usp33         |
| 0.38759333  | 0.000792213 | 5.93E-08 | 10 | Cxxc1         |
| 0.716833622 | 0.000816388 | 6.11E-08 | 10 | Atf1          |
| 0.327819873 | 0.000826315 | 6.19E-08 | 10 | Ppp1r8        |
| 0.971959024 | 0.00083272  | 6.24E-08 | 10 | Cnpy3         |
| 0.562971512 | 0.000836372 | 6.26E-08 | 10 | Agps          |
| 0.491961224 | 0.000855198 | 6.41E-08 | 10 | Ddx18         |
| 0.765328069 | 0.000865984 | 6.49E-08 | 10 | BC003331      |
| 1.155515696 | 0.000871116 | 6.52E-08 | 10 | Rnf8          |
| 0.379952007 | 0.000896476 | 6.71E-08 | 10 | Rpl36         |

|              |             |          |    |           |
|--------------|-------------|----------|----|-----------|
| 0.396133781  | 0.000921484 | 6.90E-08 | 10 | Rnf41     |
| 1.378554124  | 0.000939828 | 7.04E-08 | 10 | Chd3      |
| 0.688230606  | 0.000951757 | 7.13E-08 | 10 | Mvb12a    |
| 0.686854802  | 0.000957835 | 7.17E-08 | 10 | Tmem33    |
| 0.735836457  | 0.000969678 | 7.26E-08 | 10 | Ddx39     |
| 0.699513557  | 0.000996342 | 7.46E-08 | 10 | Rtp4      |
| 0.689546148  | 0.001001691 | 7.50E-08 | 10 | Gpbp1l1   |
| -0.443100923 | 0.001012132 | 7.58E-08 | 10 | Actb      |
| 0.527335184  | 0.001057003 | 7.92E-08 | 10 | Eif4e3    |
| 0.781634258  | 0.001061362 | 7.95E-08 | 10 | Pdia6     |
| 0.840329526  | 0.001066647 | 7.99E-08 | 10 | Mdfic     |
| 0.49491718   | 0.001092726 | 8.18E-08 | 10 | Ccnk      |
| 0.663438217  | 0.001134878 | 8.50E-08 | 10 | Atp5a1    |
| 0.520251913  | 0.001138473 | 8.53E-08 | 10 | Cyld      |
| 0.914523997  | 0.001144437 | 8.57E-08 | 10 | Hilpda    |
| 0.666306446  | 0.001147694 | 8.60E-08 | 10 | Nr4a2     |
| 0.483604387  | 0.001167191 | 8.74E-08 | 10 | Atf7ip    |
| 0.566681522  | 0.001187654 | 8.89E-08 | 10 | Ammecr1l  |
| 0.858656125  | 0.001191616 | 8.92E-08 | 10 | Zfand2a   |
| 0.790513883  | 0.001236474 | 9.26E-08 | 10 | Slc29a3   |
| 0.905241886  | 0.001237072 | 9.27E-08 | 10 | Nhp2      |
| 0.528314496  | 0.001244897 | 9.32E-08 | 10 | Mefv      |
| 0.743200549  | 0.001253227 | 9.39E-08 | 10 | Rab11fip2 |
| 0.355217289  | 0.00125959  | 9.43E-08 | 10 | Gid8      |
| 0.78873062   | 0.001263818 | 9.47E-08 | 10 | Nlrp3     |
| 0.613593896  | 0.00127106  | 9.52E-08 | 10 | Sf3b3     |
| 0.827243562  | 0.001273877 | 9.54E-08 | 10 | Smim3     |
| 0.453358739  | 0.001274973 | 9.55E-08 | 10 | Polr3k    |
| 1.013266012  | 0.001286198 | 9.63E-08 | 10 | Clec4n    |
| 0.686543979  | 0.001289032 | 9.65E-08 | 10 | Agpat6    |
| 0.574492381  | 0.001301776 | 9.75E-08 | 10 | Tnrc6c    |
| 0.970035556  | 0.001304563 | 9.77E-08 | 10 | Lrrc59    |
| 0.812387321  | 0.001314035 | 9.84E-08 | 10 | Krcc1     |
| 0.825848514  | 0.001342392 | 1.01E-07 | 10 | Bhlhe40   |
| 0.409722334  | 0.001356772 | 1.02E-07 | 10 | Sfmbt1    |
| 0.689170345  | 0.001385806 | 1.04E-07 | 10 | Anapc7    |
| 0.797003774  | 0.00139065  | 1.04E-07 | 10 | Rbm5      |
| 0.843628131  | 0.001400564 | 1.05E-07 | 10 | Mkl1      |
| 0.390538603  | 0.001408762 | 1.06E-07 | 10 | Arfgap1   |
| 0.378612833  | 0.00142297  | 1.07E-07 | 10 | Lin37     |
| 0.67576692   | 0.001429122 | 1.07E-07 | 10 | Cyp4f18   |
| 0.385382333  | 0.001454448 | 1.09E-07 | 10 | Ctnnbl1   |
| 1.097864705  | 0.00147903  | 1.11E-07 | 10 | Mrvi1     |
| 0.271077111  | 0.001518826 | 1.14E-07 | 10 | Zfp518a   |
| 0.32659807   | 0.001556052 | 1.17E-07 | 10 | Tagap1    |
| 0.431548359  | 0.001567548 | 1.17E-07 | 10 | Hgf       |
| 0.265202796  | 0.00158897  | 1.19E-07 | 10 | Zfp637    |
| 0.460870975  | 0.001644576 | 1.23E-07 | 10 | Fas       |
| 0.424933558  | 0.001677356 | 1.26E-07 | 10 | Ak6       |
| 0.682648822  | 0.001684538 | 1.26E-07 | 10 | Smchd1    |
| 0.855457699  | 0.001708557 | 1.28E-07 | 10 | Vimp      |
| 0.779853732  | 0.001712394 | 1.28E-07 | 10 | Ppp2ca    |
| 0.52918824   | 0.001764938 | 1.32E-07 | 10 | Adipor2   |
| 0.863674045  | 0.001787562 | 1.34E-07 | 10 | Maea      |
| 0.760419859  | 0.001796771 | 1.35E-07 | 10 | Rwdd1     |
| 0.487701779  | 0.001902005 | 1.42E-07 | 10 | Kdsr      |
| 0.939660147  | 0.001905062 | 1.43E-07 | 10 | Ech1      |
| 0.444391747  | 0.001952332 | 1.46E-07 | 10 | Naa40     |
| 0.792574514  | 0.001969399 | 1.47E-07 | 10 | Exoc3     |
| 0.525199368  | 0.002015485 | 1.51E-07 | 10 | Trmt1     |
| 0.887935874  | 0.00202385  | 1.52E-07 | 10 | Otulin    |

|             |             |          |    |               |        |
|-------------|-------------|----------|----|---------------|--------|
| 0.367521549 | 0.002044362 | 1.53E-07 | 10 | Hspa4l        |        |
| 0.593176321 | 0.002094781 | 1.57E-07 | 10 | Gorasp2       |        |
| 0.805614698 | 0.002102739 | 1.57E-07 | 10 | Wbp5          |        |
| 0.587028117 | 0.002119466 | 1.59E-07 | 10 | Rpl15         |        |
| 0.806783606 | 0.002159429 | 1.62E-07 | 10 | Fam46c        |        |
| 0.76582127  | 0.002179873 | 1.63E-07 | 10 | Lat           |        |
| 0.821633366 | 0.002194064 | 1.64E-07 | 10 | Syt11         |        |
| 0.886230355 | 0.002229511 | 1.67E-07 | 10 |               | Mar.05 |
| 0.450943062 | 0.002233619 | 1.67E-07 | 10 | Nqo2          |        |
| 0.714996576 | 0.002271922 | 1.70E-07 | 10 | Abcd1         |        |
| 0.783211289 | 0.00228962  | 1.71E-07 | 10 | Tnfaip2       |        |
| 0.593269155 | 0.00228968  | 1.71E-07 | 10 | Mrps7         |        |
| 0.764556316 | 0.002299769 | 1.72E-07 | 10 | Arl8b         |        |
| 0.823592314 | 0.002301558 | 1.72E-07 | 10 | Arcn1         |        |
| 0.770209746 | 0.002311261 | 1.73E-07 | 10 | Nucb2         |        |
| 0.733321837 | 0.002317921 | 1.74E-07 | 10 | Clip1         |        |
| 0.778121008 | 0.002328899 | 1.74E-07 | 10 | Mrpl12        |        |
| 1.289502302 | 0.002335687 | 1.75E-07 | 10 | Ubqln1        |        |
| 0.728679054 | 0.002355705 | 1.76E-07 | 10 | Tuba1b        |        |
| 0.437839448 | 0.00240697  | 1.80E-07 | 10 | Clp1          |        |
| 0.871538011 | 0.00242418  | 1.82E-07 | 10 | Hspa4         |        |
| 0.644090798 | 0.002460361 | 1.84E-07 | 10 | Rps19bp1      |        |
| 0.599577516 | 0.002485072 | 1.86E-07 | 10 | Max           |        |
| 0.479806256 | 0.002485913 | 1.86E-07 | 10 | Tiprl         |        |
| 0.427954033 | 0.002500831 | 1.87E-07 | 10 | Setd5         |        |
| 0.607164645 | 0.002595765 | 1.94E-07 | 10 | Slc4a2        |        |
| 0.91149456  | 0.002595825 | 1.94E-07 | 10 | Cadm1         |        |
| 0.858666102 | 0.002607641 | 1.95E-07 | 10 | Map4          |        |
| 0.780598399 | 0.002667949 | 2.00E-07 | 10 | Dyrk1a        |        |
| 0.814237999 | 0.002673506 | 2.00E-07 | 10 | Zranb2        |        |
| 0.574723325 | 0.002725862 | 2.04E-07 | 10 | Abce1         |        |
| 0.328123388 | 0.002775108 | 2.08E-07 | 10 | Hspbp1        |        |
| 0.773306066 | 0.002775504 | 2.08E-07 | 10 | Comm7         |        |
| 0.816916582 | 0.002832955 | 2.12E-07 | 10 | Clec7a        |        |
| 0.499498816 | 0.002867894 | 2.15E-07 | 10 | Tmem184c      |        |
| 0.367615548 | 0.002890469 | 2.16E-07 | 10 | Nudt14        |        |
| 0.890160008 | 0.002935128 | 2.20E-07 | 10 | Usp14         |        |
| 0.716639956 | 0.00300306  | 2.25E-07 | 10 | Pkib          |        |
| 0.831803675 | 0.003007562 | 2.25E-07 | 10 | Ssr3          |        |
| 0.513741572 | 0.003042307 | 2.28E-07 | 10 | 1810011H11Rik |        |
| 0.753748115 | 0.00312996  | 2.34E-07 | 10 | Hdac2         |        |
| 0.881372294 | 0.003164985 | 2.37E-07 | 10 | Tcf25         |        |
| 0.536031702 | 0.003208702 | 2.40E-07 | 10 | Mdp1          |        |
| 0.672770537 | 0.003217654 | 2.41E-07 | 10 | Ncs1          |        |
| 0.430012094 | 0.003228824 | 2.42E-07 | 10 | Zbtb2         |        |
| 0.563281687 | 0.00331961  | 2.49E-07 | 10 | Stxbp3a       |        |
| 0.438626546 | 0.003359207 | 2.52E-07 | 10 | Zyg11b        |        |
| 0.774156947 | 0.00340455  | 2.55E-07 | 10 | Pja2          |        |
| 0.409801419 | 0.003429223 | 2.57E-07 | 10 | Psat1         |        |
| 0.53290247  | 0.003433164 | 2.57E-07 | 10 | Mctp1         |        |
| 0.712866971 | 0.003442341 | 2.58E-07 | 10 | Smu1          |        |
| 0.308918805 | 0.003442574 | 2.58E-07 | 10 | Stk3          |        |
| 0.557322746 | 0.003524732 | 2.64E-07 | 10 | Vps72         |        |
| 0.666391104 | 0.00352573  | 2.64E-07 | 10 | Cct5          |        |
| 0.667400725 | 0.003615786 | 2.71E-07 | 10 | Top1          |        |
| 0.800259723 | 0.003653112 | 2.74E-07 | 10 | Dctn5         |        |
| 0.823253926 | 0.003654945 | 2.74E-07 | 10 | Ctbp2         |        |
| 0.360875683 | 0.003672335 | 2.75E-07 | 10 | Dennd2c       |        |
| 0.821922362 | 0.003674279 | 2.75E-07 | 10 | Thbs1         |        |
| 0.750211182 | 0.003718417 | 2.78E-07 | 10 | Cdt1          |        |
| 0.514530013 | 0.003749358 | 2.81E-07 | 10 | Cep83         |        |

|              |             |          |    |          |
|--------------|-------------|----------|----|----------|
| 0.516392239  | 0.00384087  | 2.88E-07 | 10 | Nop9     |
| 0.866038853  | 0.003869951 | 2.90E-07 | 10 | Eif2s1   |
| 0.638369036  | 0.003913437 | 2.93E-07 | 10 | Tmem251  |
| 0.621778299  | 0.003918479 | 2.93E-07 | 10 | Hnrnp1l  |
| 0.859522175  | 0.003933292 | 2.95E-07 | 10 | Aurkaip1 |
| 0.735299152  | 0.00398588  | 2.99E-07 | 10 | Ube2f    |
| 0.475789566  | 0.004016087 | 3.01E-07 | 10 | Pdgfc    |
| 0.732247211  | 0.004052664 | 3.04E-07 | 10 | Rabgef1  |
| 0.267450092  | 0.00408895  | 3.06E-07 | 10 | Taf1     |
| 0.421062647  | 0.004091883 | 3.06E-07 | 10 | Ldlrad4  |
| 0.673334006  | 0.004106917 | 3.08E-07 | 10 | Snap29   |
| 0.326405132  | 0.004166457 | 3.12E-07 | 10 | Lancl1   |
| 0.450294544  | 0.00417583  | 3.13E-07 | 10 | Egr2     |
| 0.577830276  | 0.004224198 | 3.16E-07 | 10 | Khdrbs1  |
| 0.426622674  | 0.004237683 | 3.17E-07 | 10 | Uhrf1    |
| 0.735383188  | 0.004379404 | 3.28E-07 | 10 | Acbd3    |
| -0.686681227 | 0.004459147 | 3.34E-07 | 10 | Cst3     |
| 0.402593864  | 0.00457628  | 3.43E-07 | 10 | Galnt2   |
| 0.901639197  | 0.004577673 | 3.43E-07 | 10 | Asap1    |
| 0.849848344  | 0.004601163 | 3.45E-07 | 10 | Pabpn1   |
| 0.818536347  | 0.004632894 | 3.47E-07 | 10 | Etfb     |
| 0.535517688  | 0.004690953 | 3.51E-07 | 10 | Mdn1     |
| 0.412730849  | 0.004788138 | 3.59E-07 | 10 | Mob4     |
| 0.415136728  | 0.004832517 | 3.62E-07 | 10 | Cry1     |
| 0.702886148  | 0.00487298  | 3.65E-07 | 10 | Fhl3     |
| 0.639367027  | 0.004877883 | 3.65E-07 | 10 | Dot1l    |
| 0.655055701  | 0.004884057 | 3.66E-07 | 10 | Pptc7    |
| 0.553542023  | 0.004897074 | 3.67E-07 | 10 | Nol8     |
| 0.73316672   | 0.0049147   | 3.68E-07 | 10 | Polr2a   |
| 0.324385631  | 0.004934981 | 3.70E-07 | 10 | Crebrf   |
| 0.739776485  | 0.004972364 | 3.72E-07 | 10 | Ddx46    |
| 1.058098034  | 0.004975771 | 3.73E-07 | 10 | Snx17    |
| 0.447858819  | 0.005223598 | 3.91E-07 | 10 | Ccdc115  |
| 0.791457292  | 0.005287991 | 3.96E-07 | 10 | Psm1     |
| 0.565654403  | 0.005353553 | 4.01E-07 | 10 | Snx12    |
| 1.01542164   | 0.005368221 | 4.02E-07 | 10 | Camta2   |
| 0.820313614  | 0.005394584 | 4.04E-07 | 10 | Vps4b    |
| 0.251353676  | 0.005423038 | 4.06E-07 | 10 | Parp16   |
| 0.680000564  | 0.005440686 | 4.07E-07 | 10 | Tapbp    |
| 0.695304639  | 0.005462087 | 4.09E-07 | 10 | Tax1bp1  |
| 0.872202492  | 0.005571066 | 4.17E-07 | 10 | Map2k4   |
| 0.727622544  | 0.005607699 | 4.20E-07 | 10 | Gnaq     |
| 0.450947811  | 0.005620598 | 4.21E-07 | 10 | Rnpc3    |
| -2.584422509 | 0.005728384 | 4.29E-07 | 10 | Syng1    |
| 0.8399782    | 0.005776813 | 4.33E-07 | 10 | Jak2     |
| 0.261928966  | 0.005908489 | 4.43E-07 | 10 | Lsm2     |
| 0.712024507  | 0.00594304  | 4.45E-07 | 10 | Il1b     |
| 0.525702217  | 0.005994224 | 4.49E-07 | 10 | Nme3     |
| 0.254445699  | 0.006332944 | 4.74E-07 | 10 | Mettl16  |
| 0.585238076  | 0.006395984 | 4.79E-07 | 10 | Gpr137   |
| 0.508222435  | 0.006411166 | 4.80E-07 | 10 | Mrps35   |
| 0.271152771  | 0.006510656 | 4.88E-07 | 10 | Mbip     |
| 0.595084724  | 0.006572668 | 4.92E-07 | 10 | Gon4l    |
| 0.656420257  | 0.006582903 | 4.93E-07 | 10 | Nop14    |
| 0.485316737  | 0.00661694  | 4.96E-07 | 10 | Slc1a5   |
| 0.725735392  | 0.006799798 | 5.09E-07 | 10 | Ogdh     |
| 0.460887796  | 0.006854171 | 5.13E-07 | 10 | Taf6     |
| 0.490866159  | 0.006895755 | 5.16E-07 | 10 | Cspp1    |
| 0.765825646  | 0.006997842 | 5.24E-07 | 10 | Clec4e   |
| 0.307427009  | 0.007075652 | 5.30E-07 | 10 | Clcn3    |
| 0.413784878  | 0.007095732 | 5.31E-07 | 10 | Mtmr4    |

|             |             |          |    |           |
|-------------|-------------|----------|----|-----------|
| 0.775643622 | 0.007144486 | 5.35E-07 | 10 | Uba1      |
| 0.568549808 | 0.007282573 | 5.45E-07 | 10 | Naip5     |
| 0.270485387 | 0.00733563  | 5.49E-07 | 10 | Clec2d    |
| 0.531449295 | 0.007350154 | 5.50E-07 | 10 | Ado       |
| 0.408562415 | 0.007352331 | 5.51E-07 | 10 | Flot1     |
| 0.783060768 | 0.007352796 | 5.51E-07 | 10 | Sdf2      |
| 0.271926886 | 0.00748104  | 5.60E-07 | 10 | Zfp524    |
| 0.409628334 | 0.007817792 | 5.86E-07 | 10 | Cept1     |
| 0.703243741 | 0.008185561 | 6.13E-07 | 10 | Usp34     |
| 0.716257335 | 0.00821395  | 6.15E-07 | 10 | Nceh1     |
| 0.680845002 | 0.008266787 | 6.19E-07 | 10 | Ubxn4     |
| 0.62648159  | 0.008359844 | 6.26E-07 | 10 | Smarcc2   |
| 0.742400352 | 0.008434549 | 6.32E-07 | 10 | Ube2b     |
| 0.535638223 | 0.008561108 | 6.41E-07 | 10 | R3hdm1    |
| 0.90715356  | 0.008718626 | 6.53E-07 | 10 | Dpp7      |
| 0.785949519 | 0.008728558 | 6.54E-07 | 10 | Pa2g4     |
| 0.577758689 | 0.008738606 | 6.54E-07 | 10 | Arl6ip1   |
| 0.730320364 | 0.008748451 | 6.55E-07 | 10 | Itsn2     |
| 0.461577689 | 0.008951523 | 6.70E-07 | 10 | Myo10     |
| 0.790701296 | 0.008984167 | 6.73E-07 | 10 | Rbm42     |
| 0.565707552 | 0.009091503 | 6.81E-07 | 10 | Gnptg     |
| 0.751034024 | 0.009144086 | 6.85E-07 | 10 | Gla       |
| 0.578655158 | 0.009164912 | 6.86E-07 | 10 | Papd5     |
| 0.735789719 | 0.009178966 | 6.87E-07 | 10 | Fam134a   |
| 0.27838942  | 0.009315976 | 6.98E-07 | 10 | Tfpt      |
| 0.278817054 | 0.009329252 | 6.99E-07 | 10 | Polr1a    |
| 0.76540979  | 0.009391891 | 7.03E-07 | 10 | Psmc7     |
| 0.573124097 | 0.009402624 | 7.04E-07 | 10 | Crebbp    |
| 0.769655678 | 0.009416426 | 7.05E-07 | 10 | Ebp       |
| 0.482661595 | 0.009429164 | 7.06E-07 | 10 | Asnsd1    |
| 0.274291169 | 0.009523473 | 7.13E-07 | 10 | Glb1      |
| 0.46350633  | 0.009571703 | 7.17E-07 | 10 | Hspa14    |
| 0.627675458 | 0.009728911 | 7.29E-07 | 10 | Cyp4v3    |
| 0.670038601 | 0.009748346 | 7.30E-07 | 10 | Prdx4     |
| 0.543199085 | 0.009847132 | 7.38E-07 | 10 | Zc3h18    |
| 0.458183919 | 0.010366813 | 7.76E-07 | 10 | Nsmaf     |
| 0.476176488 | 0.010386325 | 7.78E-07 | 10 | Ralgapb   |
| 0.319927172 | 0.01045105  | 7.83E-07 | 10 | Cdc42ep2  |
| 0.589419094 | 0.010529983 | 7.89E-07 | 10 | Fnbp1l    |
| 0.301235039 | 0.010637699 | 7.97E-07 | 10 | Lrrc75a   |
| 0.626930669 | 0.010662757 | 7.99E-07 | 10 | Ehmt2     |
| 0.588231475 | 0.010879534 | 8.15E-07 | 10 | Cped1     |
| 0.411076442 | 0.010918813 | 8.18E-07 | 10 | Aqr       |
| 0.263245334 | 0.010937804 | 8.19E-07 | 10 | Zfp276    |
| 0.416768355 | 0.011011576 | 8.25E-07 | 10 | Tctex1d4  |
| 0.311711402 | 0.011021717 | 8.25E-07 | 10 | Trnt1     |
| 0.743597376 | 0.011137887 | 8.34E-07 | 10 | Dnajc3    |
| 0.451510946 | 0.011289731 | 8.46E-07 | 10 | N4bp2l1   |
| 0.510899026 | 0.011321396 | 8.48E-07 | 10 | Kidins220 |
| 0.600105825 | 0.011386984 | 8.53E-07 | 10 | Atg13     |
| 0.728715232 | 0.011408095 | 8.54E-07 | 10 | Hnrnpa0   |
| 0.659354026 | 0.011496002 | 8.61E-07 | 10 | Pak1ip1   |
| 1.248552484 | 0.011500875 | 8.61E-07 | 10 | Lfng      |
| 0.483432457 | 0.011636537 | 8.72E-07 | 10 | Al504432  |
| 0.347990238 | 0.011745753 | 8.80E-07 | 10 | Rab11fip1 |
| 0.729037124 | 0.011877888 | 8.90E-07 | 10 | Ndufs7    |
| 0.784440713 | 0.011883486 | 8.90E-07 | 10 | Uggt1     |
| 0.406239981 | 0.01238068  | 9.27E-07 | 10 | Gna15     |
| 0.373080979 | 0.012675166 | 9.49E-07 | 10 | Pde6d     |
| 0.643144446 | 0.012681357 | 9.50E-07 | 10 | Ghitm     |
| 0.536180442 | 0.012790355 | 9.58E-07 | 10 | Acat1     |

|              |             |          |    |               |
|--------------|-------------|----------|----|---------------|
| 0.429718947  | 0.013377588 | 1.00E-06 | 10 | Mettl9        |
| 0.671556343  | 0.013397389 | 1.00E-06 | 10 | Trps1         |
| 0.662091294  | 0.01346421  | 1.01E-06 | 10 | Ngdn          |
| 0.786337372  | 0.014531341 | 1.09E-06 | 10 | Fam195b       |
| 0.57656878   | 0.014553983 | 1.09E-06 | 10 | Slc3a2        |
| 0.645488409  | 0.014634575 | 1.10E-06 | 10 | Ep400         |
| 0.311706339  | 0.014638017 | 1.10E-06 | 10 | Kctd5         |
| 0.65348113   | 0.014782549 | 1.11E-06 | 10 | Mcts1         |
| 0.458774126  | 0.01497427  | 1.12E-06 | 10 | Fam49a        |
| 0.596357161  | 0.01506704  | 1.13E-06 | 10 | Emb           |
| 0.717396515  | 0.0153529   | 1.15E-06 | 10 | Smc6          |
| 0.261013825  | 0.015396375 | 1.15E-06 | 10 | Hras          |
| 0.47114714   | 0.015783776 | 1.18E-06 | 10 | Plxnd1        |
| 0.712912089  | 0.015810396 | 1.18E-06 | 10 | Ndufs4        |
| 0.726610307  | 0.015946436 | 1.19E-06 | 10 | Psmc4         |
| 0.638549596  | 0.016004942 | 1.20E-06 | 10 | Ripk1         |
| 0.426764047  | 0.016067666 | 1.20E-06 | 10 | Phf11b        |
| 0.474925706  | 0.016313685 | 1.22E-06 | 10 | Ring1         |
| -1.266557495 | 0.016401199 | 1.23E-06 | 10 | Rps19         |
| 0.376500549  | 0.016507429 | 1.24E-06 | 10 | Kremen1       |
| 0.616148537  | 0.01655955  | 1.24E-06 | 10 | Mesdc2        |
| 0.360986527  | 0.016955904 | 1.27E-06 | 10 | Slc15a2       |
| 0.489232693  | 0.016982948 | 1.27E-06 | 10 | P2rx7         |
| 0.699033602  | 0.017269183 | 1.29E-06 | 10 | Plekho2       |
| 0.385844301  | 0.017371319 | 1.30E-06 | 10 | Manbal        |
| 0.603385748  | 0.017380904 | 1.30E-06 | 10 | Fam117b       |
| 0.752099754  | 0.017590923 | 1.32E-06 | 10 | Bmpr2         |
| 0.63832475   | 0.017617885 | 1.32E-06 | 10 | Cyth2         |
| 0.64195435   | 0.018013083 | 1.35E-06 | 10 | Vps11         |
| 0.89116901   | 0.018252577 | 1.37E-06 | 10 | Rreb1         |
| 0.810646235  | 0.018319662 | 1.37E-06 | 10 | Lpp           |
| 0.608372854  | 0.018847699 | 1.41E-06 | 10 | Anapc2        |
| 0.281443939  | 0.019621901 | 1.47E-06 | 10 | Skap1         |
| 0.841118865  | 0.019790085 | 1.48E-06 | 10 | Slc25a11      |
| 0.573549038  | 0.01982935  | 1.49E-06 | 10 | Spast         |
| 0.448253348  | 0.019982889 | 1.50E-06 | 10 | Atg101        |
| 0.781871745  | 0.0207525   | 1.55E-06 | 10 | Rnpep         |
| 0.442007593  | 0.020830121 | 1.56E-06 | 10 | Timp3         |
| 0.279058971  | 0.020897937 | 1.57E-06 | 10 | Fyttd1        |
| 0.463037756  | 0.02124332  | 1.59E-06 | 10 | Ulk2          |
| 0.475853334  | 0.021288431 | 1.59E-06 | 10 | Wdr11         |
| 0.494580095  | 0.021647884 | 1.62E-06 | 10 | Trappc10      |
| 0.493482235  | 0.022483087 | 1.68E-06 | 10 | lfrd1         |
| 0.682529319  | 0.02289234  | 1.71E-06 | 10 | Atp6v0d1      |
| 0.466959833  | 0.023002923 | 1.72E-06 | 10 | Cd3e          |
| 0.792449694  | 0.023113164 | 1.73E-06 | 10 | Itgb3         |
| 0.572267816  | 0.023444455 | 1.76E-06 | 10 | Macf1         |
| 0.3428886    | 0.023914415 | 1.79E-06 | 10 | Htra2         |
| 0.592441168  | 0.023952867 | 1.79E-06 | 10 | Riok3         |
| 0.762687463  | 0.023993439 | 1.80E-06 | 10 | Npepl1        |
| 0.472357868  | 0.024532113 | 1.84E-06 | 10 | 2310022A10Rik |
| 0.34100171   | 0.024736854 | 1.85E-06 | 10 | Srp54a        |
| 1.050341348  | 0.024894198 | 1.86E-06 | 10 | Slc15a3       |
| 0.668936206  | 0.024925354 | 1.87E-06 | 10 | Slamf7        |
| 0.842717136  | 0.024970235 | 1.87E-06 | 10 | Slc20a1       |
| 0.388620597  | 0.025063157 | 1.88E-06 | 10 | Rbm14         |
| 0.304686293  | 0.025478601 | 1.91E-06 | 10 | Clock         |
| 0.583019937  | 0.025822829 | 1.93E-06 | 10 | Psmd6         |
| 0.679576062  | 0.026011862 | 1.95E-06 | 10 | Ten1          |
| 0.501928984  | 0.026253131 | 1.97E-06 | 10 | Cbx5          |
| 0.546882622  | 0.026369968 | 1.97E-06 | 10 | Mrps23        |

|              |             |          |    |          |
|--------------|-------------|----------|----|----------|
| 0.69380714   | 0.02637473  | 1.98E-06 | 10 | Igsf8    |
| 0.589153175  | 0.026445076 | 1.98E-06 | 10 | Rnf149   |
| 0.314009734  | 0.026452004 | 1.98E-06 | 10 | Tango2   |
| 0.667613589  | 0.026793464 | 2.01E-06 | 10 | Rnf111   |
| -2.24478026  | 0.027096943 | 2.03E-06 | 10 | Eps15    |
| 0.514755696  | 0.027824416 | 2.08E-06 | 10 | Cops8    |
| 0.643534824  | 0.028404692 | 2.13E-06 | 10 | Scand1   |
| 0.817939513  | 0.02902519  | 2.17E-06 | 10 | Eif3d    |
| 0.5453118    | 0.029580456 | 2.22E-06 | 10 | Twistnb  |
| 0.448524957  | 0.029750982 | 2.23E-06 | 10 | Irs2     |
| 0.547986313  | 0.02976021  | 2.23E-06 | 10 | Mrpl3    |
| 0.622038493  | 0.030051117 | 2.25E-06 | 10 | Arl5a    |
| 0.71834863   | 0.030101238 | 2.25E-06 | 10 | Rapgef6  |
| 0.73808928   | 0.03041735  | 2.28E-06 | 10 | Gde1     |
| 0.44613131   | 0.030948659 | 2.32E-06 | 10 | Camkk2   |
| 0.729079479  | 0.031393768 | 2.35E-06 | 10 | Pdgfa    |
| 0.872057272  | 0.031776228 | 2.38E-06 | 10 | Atp2a2   |
| 0.554819616  | 0.031786058 | 2.38E-06 | 10 | Ptpn2    |
| 0.640585174  | 0.031832534 | 2.38E-06 | 10 | Vav1     |
| 0.317524085  | 0.032019679 | 2.40E-06 | 10 | Serpinb8 |
| 0.706901455  | 0.032230827 | 2.41E-06 | 10 | Ptpro    |
| 0.668565197  | 0.032666022 | 2.45E-06 | 10 | Psmc5    |
| 0.633984789  | 0.033358495 | 2.50E-06 | 10 | Bag1     |
| 0.533667948  | 0.033475706 | 2.51E-06 | 10 | Cacybp   |
| 0.593449033  | 0.033574274 | 2.51E-06 | 10 | Lbr      |
| 0.57205609   | 0.033884279 | 2.54E-06 | 10 | Dhx15    |
| 0.377434465  | 0.034061579 | 2.55E-06 | 10 | Hps1     |
| 0.307722823  | 0.034224397 | 2.56E-06 | 10 | AB041803 |
| 0.53680111   | 0.034985919 | 2.62E-06 | 10 | Gpr183   |
| 0.475702218  | 0.035112565 | 2.63E-06 | 10 | Lhpp     |
| 0.500909282  | 0.035324106 | 2.65E-06 | 10 | Rps6kb1  |
| 0.332080186  | 0.035329561 | 2.65E-06 | 10 | Tollip   |
| 0.492676305  | 0.035790291 | 2.68E-06 | 10 | Snx13    |
| 0.309923044  | 0.036028633 | 2.70E-06 | 10 | Rbm27    |
| 0.802558625  | 0.036545223 | 2.74E-06 | 10 | Plod1    |
| 0.443001925  | 0.037101882 | 2.78E-06 | 10 | Braf     |
| 0.665761812  | 0.03710385  | 2.78E-06 | 10 | Ppp2r5c  |
| -2.349096367 | 0.038852738 | 2.91E-06 | 10 | Rin2     |
| 0.751471695  | 0.039963087 | 2.99E-06 | 10 | Slc11a2  |
| 0.666195663  | 0.040184527 | 3.01E-06 | 10 | Emc6     |
| -2.237472981 | 0.040214749 | 3.01E-06 | 10 | Dpysl2   |
| 0.275427155  | 0.04022515  | 3.01E-06 | 10 | Ccne1    |
| 0.324330754  | 0.040420112 | 3.03E-06 | 10 | Mtm1     |
| 0.442188941  | 0.040572789 | 3.04E-06 | 10 | Zfp597   |
| 1.166348054  | 0.041617924 | 3.12E-06 | 10 | Polr2i   |
| 0.295578727  | 0.041722694 | 3.12E-06 | 10 | Nup35    |
| -0.566621828 | 0.041823141 | 3.13E-06 | 10 | B2m      |
| 0.30881854   | 0.042132026 | 3.16E-06 | 10 | Ciao1    |
| 0.56664442   | 0.042879095 | 3.21E-06 | 10 | Atpif1   |
| 0.439707847  | 0.043455114 | 3.25E-06 | 10 | Wdr74    |
| 0.534057624  | 0.04373448  | 3.28E-06 | 10 | Fmnl3    |
| 0.297292205  | 0.044149271 | 3.31E-06 | 10 | Nup62    |
| -2.313892011 | 0.044412442 | 3.33E-06 | 10 | Cdk2ap2  |
| 0.268676159  | 0.044490558 | 3.33E-06 | 10 | Ap1m1    |
| 0.363755396  | 0.044775788 | 3.35E-06 | 10 | Col27a1  |
| 0.346809766  | 0.045301293 | 3.39E-06 | 10 | Tmcc1    |
| 0.273646019  | 0.045425675 | 3.40E-06 | 10 | Nr1d2    |
| 0.600540864  | 0.045615808 | 3.42E-06 | 10 | Taf1d    |
| 0.422253276  | 0.045783137 | 3.43E-06 | 10 | Uaca     |
| 0.659719657  | 0.045798675 | 3.43E-06 | 10 | Cops2    |
| 0.315833838  | 0.046257224 | 3.46E-06 | 10 | Cbr1     |

|             |             |          |    |               |
|-------------|-------------|----------|----|---------------|
| 0.40565562  | 0.046269629 | 3.47E-06 | 10 | Polr2m        |
| 0.30765372  | 0.046403223 | 3.48E-06 | 10 | Mrps28        |
| 0.612930713 | 0.046575157 | 3.49E-06 | 10 | Rab3gap2      |
| 0.331537984 | 0.046763615 | 3.50E-06 | 10 | Spryd7        |
| 0.561878793 | 0.047016304 | 3.52E-06 | 10 | Plcg2         |
| 0.768867516 | 0.048113433 | 3.60E-06 | 10 | Flna          |
| 0.560927977 | 0.048163834 | 3.61E-06 | 10 | Mrpl48        |
| 0.568012319 | 0.049023985 | 3.67E-06 | 10 | Rbp1          |
| 0.790388528 | 0.049123665 | 3.68E-06 | 10 | Mmp14         |
| 0.411389588 | 0.049167061 | 3.68E-06 | 10 | Nfil3         |
| 0.620670575 | 0.049207478 | 3.69E-06 | 10 | Ccdc86        |
| 0.74009579  | 0.04955136  | 3.71E-06 | 10 | Hdgfrp3       |
| 0.657303905 | 0.049799303 | 3.73E-06 | 10 | Cds1          |
| 0.555915863 | 0.050447148 | 3.78E-06 | 10 | Cntrl         |
| 0.2920968   | 0.051102302 | 3.83E-06 | 10 | Flot2         |
| 0.63155341  | 0.052033715 | 3.90E-06 | 10 | Ifi204        |
| 0.657874354 | 0.052424438 | 3.93E-06 | 10 | Ndufb8        |
| 0.626742067 | 0.053005287 | 3.97E-06 | 10 | Plaur         |
| 0.266569523 | 0.053654602 | 4.02E-06 | 10 | Mtr           |
| 0.463876996 | 0.054139947 | 4.05E-06 | 10 | Gas2l3        |
| 0.262225385 | 0.054383424 | 4.07E-06 | 10 | Cul2          |
| 0.737122899 | 0.054406611 | 4.07E-06 | 10 | Tmem126a      |
| 0.726235732 | 0.054838432 | 4.11E-06 | 10 | Itgax         |
| 0.618067919 | 0.054925892 | 4.11E-06 | 10 | Ormdl2        |
| 0.711918946 | 0.055764524 | 4.18E-06 | 10 | Ap2m1         |
| 0.591726328 | 0.056871382 | 4.26E-06 | 10 | Tnfaip3       |
| 0.869622611 | 0.057882041 | 4.34E-06 | 10 | Zmat5         |
| 0.490644533 | 0.059387646 | 4.45E-06 | 10 | Gnai3         |
| 0.596723768 | 0.059416915 | 4.45E-06 | 10 | Mfsd1         |
| 0.592867947 | 0.059586145 | 4.46E-06 | 10 | BC005537      |
| 0.340934615 | 0.059993148 | 4.49E-06 | 10 | Stim2         |
| 0.829645536 | 0.06108175  | 4.57E-06 | 10 | Tgm2          |
| 0.436289661 | 0.062088723 | 4.65E-06 | 10 | Cisd2         |
| 0.331264485 | 0.062589561 | 4.69E-06 | 10 | Irf2bp1       |
| 0.319694262 | 0.062598667 | 4.69E-06 | 10 | Ccdc130       |
| 0.633504066 | 0.063954379 | 4.79E-06 | 10 | Uvrag         |
| 0.531606293 | 0.064084011 | 4.80E-06 | 10 | Rsrp1         |
| 0.670555278 | 0.064197041 | 4.81E-06 | 10 | Elovl1        |
| 0.478705848 | 0.065204675 | 4.88E-06 | 10 | Stau1         |
| 0.628671921 | 0.065259409 | 4.89E-06 | 10 | Tra2b         |
| 0.356217173 | 0.066773749 | 5.00E-06 | 10 | Ubxn6         |
| 0.467238226 | 0.067190407 | 5.03E-06 | 10 | Slc25a44      |
| 0.262828658 | 0.067534189 | 5.06E-06 | 10 | Hnnrpr        |
| 0.476176488 | 0.067939032 | 5.09E-06 | 10 | 1300002K09Rik |
| 0.344429218 | 0.068904326 | 5.16E-06 | 10 | Ncln          |
| 0.575364145 | 0.070099976 | 5.25E-06 | 10 | Birc6         |
| 0.642702357 | 0.07022365  | 5.26E-06 | 10 | Fam13b        |
| 0.587212252 | 0.071362464 | 5.34E-06 | 10 | Nfkbib        |
| 0.642506989 | 0.072907655 | 5.46E-06 | 10 | Rbm33         |
| 0.554716315 | 0.073491903 | 5.50E-06 | 10 | Tpm2          |
| 0.574589516 | 0.073815443 | 5.53E-06 | 10 | Pin1          |
| 0.272527919 | 0.0739777   | 5.54E-06 | 10 | Ugdh          |
| 0.511200762 | 0.074179688 | 5.56E-06 | 10 | Tmem65        |
| 0.510061207 | 0.074536267 | 5.58E-06 | 10 | Mia3          |
| 0.514750696 | 0.074981128 | 5.62E-06 | 10 | Hk2           |
| 0.525028574 | 0.075469111 | 5.65E-06 | 10 | Smc4          |
| 0.476698727 | 0.076043745 | 5.70E-06 | 10 | Smek1         |
| 0.57001716  | 0.076617972 | 5.74E-06 | 10 | Lsm14a        |
| 0.353116396 | 0.078443055 | 5.88E-06 | 10 | Il18          |
| 0.567829583 | 0.079797244 | 5.98E-06 | 10 | Atp5d         |
| 0.621935224 | 0.07997555  | 5.99E-06 | 10 | Wapal         |



|              |             |          |    |             |        |
|--------------|-------------|----------|----|-------------|--------|
| 0.390383334  | 0.080018967 | 5.99E-06 | 10 | Cpsf2       |        |
| 0.688474702  | 0.080155467 | 6.00E-06 | 10 | Smad1       |        |
| 0.440617186  | 0.080279105 | 6.01E-06 | 10 | Tars2       |        |
| 0.407645084  | 0.080392588 | 6.02E-06 | 10 | Rpain       |        |
| 0.421765329  | 0.080424127 | 6.02E-06 | 10 | Mrpl28      |        |
| 0.282964612  | 0.080429877 | 6.02E-06 | 10 | Cpsf3l      |        |
| 0.749829045  | 0.082077549 | 6.15E-06 | 10 | Esyt1       |        |
| 0.255579898  | 0.082320596 | 6.17E-06 | 10 | Ddhd2       |        |
| 0.65734153   | 0.082500924 | 6.18E-06 | 10 | Utp11l      |        |
| 0.325316166  | 0.083020603 | 6.22E-06 | 10 | Gga3        |        |
| 0.595613759  | 0.083609957 | 6.26E-06 | 10 | Sft2d2      |        |
| 0.65123264   | 0.083943358 | 6.29E-06 | 10 | Nipbl       |        |
| 0.717287617  | 0.084507982 | 6.33E-06 | 10 | Pde4b       |        |
| 0.584810329  | 0.084997044 | 6.37E-06 | 10 | NP-904339.1 |        |
| 0.622048074  | 0.08683345  | 6.50E-06 | 10 | Rel         |        |
| 0.572415378  | 0.087066568 | 6.52E-06 | 10 | Eif4g1      |        |
| -2.094573723 | 0.089082998 | 6.67E-06 | 10 | Trim25      |        |
| 0.330618772  | 0.089605497 | 6.71E-06 | 10 |             | Mar.06 |
| -1.853107811 | 0.091131149 | 6.83E-06 | 10 | Ski         |        |
| 0.544990234  | 0.091578598 | 6.86E-06 | 10 | Csnk1a1     |        |
| 0.263439843  | 0.091891168 | 6.88E-06 | 10 | Nmt2        |        |
| 0.447529145  | 0.091939912 | 6.89E-06 | 10 | Cerk        |        |
| 0.324196773  | 0.092751365 | 6.95E-06 | 10 | Il2rb       |        |
| 0.5168591    | 0.093337618 | 6.99E-06 | 10 | Safb2       |        |
| 0.456728261  | 0.095022681 | 7.12E-06 | 10 | Dpm3        |        |
| 0.680820699  | 0.097389103 | 7.29E-06 | 10 | Zfpl1       |        |
| 0.298112348  | 0.097883945 | 7.33E-06 | 10 | Qtrt1       |        |
| 0.419466204  | 0.098389845 | 7.37E-06 | 10 | Anks3       |        |
| 0.369031851  | 0.099230218 | 7.43E-06 | 10 | Pign        |        |
| 0.643814825  | 0.10110937  | 7.57E-06 | 10 | Gsdmd       |        |
| 0.279125575  | 0.101406509 | 7.59E-06 | 10 | Prkrip1     |        |
| -0.476266528 | 0.101470195 | 7.60E-06 | 10 | Gpx1        |        |
| 1.028936257  | 0.10257407  | 7.68E-06 | 10 | Lyst        |        |
| 0.253741906  | 0.103240896 | 7.73E-06 | 10 | Mrps12      |        |
| 0.757919419  | 0.10338855  | 7.74E-06 | 10 | Kdm5c       |        |
| 0.364546077  | 0.10509272  | 7.87E-06 | 10 | Mrpl41      |        |
| 0.331953688  | 0.105767205 | 7.92E-06 | 10 | Bbip1       |        |
| 0.340733145  | 0.107160024 | 8.03E-06 | 10 | Vbp1        |        |
| 0.630913109  | 0.107743284 | 8.07E-06 | 10 | Polr2e      |        |
| 0.652378699  | 0.107883089 | 8.08E-06 | 10 | Bnip3l      |        |
| 0.421157113  | 0.107903015 | 8.08E-06 | 10 | Fnbp4       |        |
| 0.727346042  | 0.108039881 | 8.09E-06 | 10 | Dtnbp1      |        |
| 0.371671954  | 0.108512462 | 8.13E-06 | 10 | Ilf3        |        |
| 0.457937758  | 0.109724682 | 8.22E-06 | 10 | Klhdc3      |        |
| -2.039982705 | 0.110710846 | 8.29E-06 | 10 | Fndc3b      |        |
| 0.643543347  | 0.111634846 | 8.36E-06 | 10 | Psmc12      |        |
| 0.386484301  | 0.111966625 | 8.39E-06 | 10 | Dcun1d2     |        |
| -0.959729516 | 0.112828844 | 8.45E-06 | 10 | Rps26       |        |
| 0.497904044  | 0.113382186 | 8.49E-06 | 10 | Anp32a      |        |
| 0.669218884  | 0.113823897 | 8.52E-06 | 10 | Fam129b     |        |
| 0.372702217  | 0.114469275 | 8.57E-06 | 10 | Rab35       |        |
| 0.307091326  | 0.115158783 | 8.62E-06 | 10 | Mxd1        |        |
| 0.365697679  | 0.115210444 | 8.63E-06 | 10 | Dync1li2    |        |
| 0.326484572  | 0.122526465 | 9.18E-06 | 10 | Mgat2       |        |
| 0.614456837  | 0.122549442 | 9.18E-06 | 10 | Ndufa5      |        |
| 0.857304774  | 0.124801553 | 9.35E-06 | 10 | Gdf15       |        |
| 0.625945442  | 0.126218843 | 9.45E-06 | 10 | Cops5       |        |
| 0.342645096  | 0.126436729 | 9.47E-06 | 10 | Cenpw       |        |
| 0.634922931  | 0.126955318 | 9.51E-06 | 10 | Usp7        |        |
| 0.437710208  | 0.131481257 | 9.85E-06 | 10 | Smarca5     |        |
| 0.30524708   | 0.131923549 | 9.88E-06 | 10 | Rnd3        |        |

|              |             |          |    |               |
|--------------|-------------|----------|----|---------------|
| 0.42038834   | 0.132707571 | 9.94E-06 | 10 | Cmas          |
| 0.409186835  | 0.133166212 | 9.97E-06 | 10 | Cox16         |
| -2.133938832 | 0.133458944 | 1.00E-05 | 10 | Atraid        |
| 0.347798603  | 0.13362943  | 1.00E-05 | 10 | Nmd3          |
| 0.254087048  | 0.134088528 | 1.00E-05 | 10 | Fbxl5         |
| 0.561101749  | 0.136832383 | 1.02E-05 | 10 | Hdlbp         |
| 0.494621342  | 0.137282612 | 1.03E-05 | 10 | Tnf           |
| 0.495666664  | 0.13914145  | 1.04E-05 | 10 | Rufy1         |
| 0.652632926  | 0.140090316 | 1.05E-05 | 10 | Sars          |
| 0.907921851  | 0.141684679 | 1.06E-05 | 10 | Tfeb          |
| 0.769399731  | 0.142744752 | 1.07E-05 | 10 | 20100120O5Rik |
| 0.516272129  | 0.143724249 | 1.08E-05 | 10 | Rnf7          |
| 0.63156977   | 0.144167683 | 1.08E-05 | 10 | Irf1          |
| 0.556534946  | 0.144410316 | 1.08E-05 | 10 | Igsf6         |
| 0.597335858  | 0.145582718 | 1.09E-05 | 10 | Ptpre         |
| 0.340894293  | 0.145646061 | 1.09E-05 | 10 | Arhgef2       |
| 0.528781208  | 0.146870785 | 1.10E-05 | 10 | Mrpl18        |
| 0.382101131  | 0.148426515 | 1.11E-05 | 10 | Lrwd1         |
| 0.291028221  | 0.149044286 | 1.12E-05 | 10 | Tsnax         |
| 0.667138447  | 0.149984117 | 1.12E-05 | 10 | Hpgds         |
| 0.594098926  | 0.152194768 | 1.14E-05 | 10 | Eprs          |
| 0.435680339  | 0.152898349 | 1.15E-05 | 10 | Dph3          |
| 0.494715973  | 0.153682239 | 1.15E-05 | 10 | Trappc1       |
| 0.516502758  | 0.153965087 | 1.15E-05 | 10 | Grb2          |
| 0.787317499  | 0.154333497 | 1.16E-05 | 10 | Wdfy3         |
| 0.471548798  | 0.15505262  | 1.16E-05 | 10 | Zc3hav1       |
| 0.44860438   | 0.155560282 | 1.17E-05 | 10 | Mex3c         |
| 0.499030978  | 0.155690883 | 1.17E-05 | 10 | Baiap2        |
| 0.441660551  | 0.158579846 | 1.19E-05 | 10 | Elmo1         |
| 0.539994981  | 0.159084554 | 1.19E-05 | 10 | Thy1          |
| 0.314780638  | 0.159700764 | 1.20E-05 | 10 | Celf1         |
| 0.278670738  | 0.162343427 | 1.22E-05 | 10 | Tiam1         |
| 0.455638218  | 0.163739578 | 1.23E-05 | 10 | Ltbp3         |
| 0.372227533  | 0.164010633 | 1.23E-05 | 10 | Parp1         |
| 0.360399821  | 0.165494767 | 1.24E-05 | 10 | Pla2g15       |
| 0.3621846    | 0.169688827 | 1.27E-05 | 10 | Rap2c         |
| 0.483234586  | 0.172669132 | 1.29E-05 | 10 | Tgif2         |
| 0.479829238  | 0.175231299 | 1.31E-05 | 10 | Cyb561d2      |
| 0.518101209  | 0.176307116 | 1.32E-05 | 10 | Traf1d1       |
| 0.293854932  | 0.176439839 | 1.32E-05 | 10 | Chka          |
| 0.603797796  | 0.177013644 | 1.33E-05 | 10 | Ssr2          |
| 0.355042775  | 0.177417347 | 1.33E-05 | 10 | Ovca2         |
| 0.503349494  | 0.181226524 | 1.36E-05 | 10 | Hint1         |
| 1.29316755   | 0.184852067 | 1.38E-05 | 10 | Creb3l1       |
| 0.337633805  | 0.187604192 | 1.41E-05 | 10 | Setd8         |
| 0.641874491  | 0.191351383 | 1.43E-05 | 10 | Mrps14        |
| 0.419628762  | 0.192491246 | 1.44E-05 | 10 | Dusp7         |
| -2.081506715 | 0.197540603 | 1.48E-05 | 10 | Gas7          |
| 0.502248729  | 0.197863459 | 1.48E-05 | 10 | Hace1         |
| 0.343887698  | 0.199170759 | 1.49E-05 | 10 | Mvp           |
| 0.457910203  | 0.199610735 | 1.49E-05 | 10 | Smox          |
| 0.265950232  | 0.200050758 | 1.50E-05 | 10 | Enc1          |
| 0.341887348  | 0.202115716 | 1.51E-05 | 10 | Srrd          |
| -1.529375124 | 0.206574572 | 1.55E-05 | 10 | Asah1         |
| 0.638133971  | 0.207924029 | 1.56E-05 | 10 | Lamtor4       |
| 0.38036367   | 0.210519544 | 1.58E-05 | 10 | Hars          |
| 0.641104899  | 0.215032428 | 1.61E-05 | 10 | Chmp2b        |
| 0.595948783  | 0.217483406 | 1.63E-05 | 10 | Galt          |
| 0.408273535  | 0.218821939 | 1.64E-05 | 10 | Lclat1        |
| 0.586867892  | 0.222733794 | 1.67E-05 | 10 | Txn1l1        |
| 0.490687021  | 0.223057735 | 1.67E-05 | 10 | Smg5          |

|              |             |          |    |          |
|--------------|-------------|----------|----|----------|
| 0.415149598  | 0.223881317 | 1.68E-05 | 10 | Map1lc3a |
| 0.582025285  | 0.224178515 | 1.68E-05 | 10 | Thoc7    |
| 0.254122855  | 0.22424703  | 1.68E-05 | 10 | Sord     |
| 0.276341704  | 0.224283963 | 1.68E-05 | 10 | Eed      |
| 0.560119045  | 0.226806672 | 1.70E-05 | 10 | Fbxw11   |
| -2.074743021 | 0.232292405 | 1.74E-05 | 10 | Ugp2     |
| 0.429261019  | 0.234825819 | 1.76E-05 | 10 | Sucla2   |
| -0.457817319 | 0.241890552 | 1.81E-05 | 10 | Ftl1     |
| 0.534836981  | 0.241990294 | 1.81E-05 | 10 | Ccni     |
| 0.547624251  | 0.245158573 | 1.84E-05 | 10 | Vps26a   |
| 0.423503427  | 0.245852872 | 1.84E-05 | 10 | Stk40    |
| 0.306989698  | 0.246968661 | 1.85E-05 | 10 | Rbm38    |
| 0.630706028  | 0.249324686 | 1.87E-05 | 10 | Acaa2    |
| 0.342254058  | 0.251706901 | 1.89E-05 | 10 | Ptdss2   |
| 0.572452728  | 0.252372725 | 1.89E-05 | 10 | Eif4a3   |
| 0.468428266  | 0.253725674 | 1.90E-05 | 10 | Shisa5   |
| 0.509064355  | 0.25543276  | 1.91E-05 | 10 | Phpt1    |
| -1.2759464   | 0.256290197 | 1.92E-05 | 10 | Rps21    |
| 0.287224302  | 0.256409079 | 1.92E-05 | 10 | Pttg1    |
| 0.460581926  | 0.256694767 | 1.92E-05 | 10 | Basp1    |
| 0.496187781  | 0.256852732 | 1.92E-05 | 10 | Spag9    |
| 0.438549134  | 0.260225352 | 1.95E-05 | 10 | Ptpn7    |
| 1.064459378  | 0.262137091 | 1.96E-05 | 10 | Mtch1    |
| 0.515619551  | 0.263503794 | 1.97E-05 | 10 | Pcif1    |
| 0.533072207  | 0.26900697  | 2.01E-05 | 10 | Psmd8    |
| -1.407193941 | 0.279078707 | 2.09E-05 | 10 | Lyz1     |
| -2.063873664 | 0.280850187 | 2.10E-05 | 10 | Cmtm3    |
| -0.853947601 | 0.291925152 | 2.19E-05 | 10 | Mir6236  |
| 0.504175883  | 0.29362645  | 2.20E-05 | 10 | Smcr8    |
| 0.52881606   | 0.300752547 | 2.25E-05 | 10 | Cct3     |
| 0.416244148  | 0.3018043   | 2.26E-05 | 10 | Elp5     |
| 0.501837829  | 0.302716215 | 2.27E-05 | 10 | Wdr37    |
| 0.268090085  | 0.303338106 | 2.27E-05 | 10 | Morf4l2  |
| 0.478801351  | 0.304439877 | 2.28E-05 | 10 | Litaf    |
| 0.6266086    | 0.310403157 | 2.32E-05 | 10 | Amdhd2   |
| 0.281079983  | 0.310555635 | 2.33E-05 | 10 | Sash3    |
| 0.441752627  | 0.321976838 | 2.41E-05 | 10 | Nek7     |
| 0.397471574  | 0.322114439 | 2.41E-05 | 10 | Shkbp1   |
| 0.397626885  | 0.323837296 | 2.43E-05 | 10 | Casp8    |
| 0.559367115  | 0.335290834 | 2.51E-05 | 10 | Rilpl2   |
| 0.637398681  | 0.335684957 | 2.51E-05 | 10 | Atxn7l3b |
| 0.583437999  | 0.336548652 | 2.52E-05 | 10 | Eif6     |
| 0.415445731  | 0.336724852 | 2.52E-05 | 10 | Dmxl1    |
| 0.447758644  | 0.341495526 | 2.56E-05 | 10 | Ash1l    |
| 0.560738212  | 0.341940923 | 2.56E-05 | 10 | Vps37b   |
| 0.545702551  | 0.344599661 | 2.58E-05 | 10 | Fam168a  |
| 0.278162226  | 0.349281384 | 2.62E-05 | 10 | Ccdc53   |
| 0.514196302  | 0.350153615 | 2.62E-05 | 10 | Dock2    |
| 0.325031522  | 0.358600226 | 2.69E-05 | 10 | Col1a1   |
| 0.695847489  | 0.362086426 | 2.71E-05 | 10 | Bloc1s1  |
| 0.495189953  | 0.363138903 | 2.72E-05 | 10 | Acot13   |
| 0.612826334  | 0.367907835 | 2.76E-05 | 10 | Fcrls    |
| 0.260760613  | 0.36947562  | 2.77E-05 | 10 | Arfgef2  |
| 0.358504238  | 0.373049216 | 2.79E-05 | 10 | Esf1     |
| 0.39170374   | 0.38476619  | 2.88E-05 | 10 | Picalm   |
| 0.618507435  | 0.38782499  | 2.90E-05 | 10 | Poldip3  |
| 0.314484347  | 0.389917101 | 2.92E-05 | 10 | Rbm26    |
| 0.333951378  | 0.389982208 | 2.92E-05 | 10 | Cpsf1    |
| 0.430149915  | 0.411959486 | 3.09E-05 | 10 | Nemf     |
| 0.495929856  | 0.413217867 | 3.09E-05 | 10 | Trim44   |
| 0.718478545  | 0.415407365 | 3.11E-05 | 10 | Rbbp7    |

|              |             |          |    |            |
|--------------|-------------|----------|----|------------|
| 0.51115742   | 0.415450056 | 3.11E-05 | 10 | Minos1     |
| 0.555133144  | 0.418524631 | 3.13E-05 | 10 | Gnptab     |
| 0.335403934  | 0.420635464 | 3.15E-05 | 10 | Iws1       |
| 0.481275712  | 0.423982694 | 3.18E-05 | 10 | Psd3       |
| 0.355018492  | 0.434242503 | 3.25E-05 | 10 | Slc23a2    |
| 0.311711402  | 0.436899236 | 3.27E-05 | 10 | Zc3hc1     |
| 0.338975367  | 0.438546578 | 3.28E-05 | 10 | Apmmap     |
| 0.708697401  | 0.440331058 | 3.30E-05 | 10 | Gch1       |
| 0.531083941  | 0.443010119 | 3.32E-05 | 10 | Gns        |
| 0.276174466  | 0.447910085 | 3.35E-05 | 10 | Klhl6      |
| 0.27216912   | 0.448670685 | 3.36E-05 | 10 | Rnf139     |
| 0.487267175  | 0.450448682 | 3.37E-05 | 10 | Reps1      |
| 0.353393742  | 0.460704367 | 3.45E-05 | 10 | Dhrs1      |
| 0.644819687  | 0.463089128 | 3.47E-05 | 10 | Nkg7       |
| 0.392438437  | 0.465188591 | 3.48E-05 | 10 | Nfam1      |
| 0.527635652  | 0.465288794 | 3.48E-05 | 10 | Mtmt10     |
| 0.344639179  | 0.467765925 | 3.50E-05 | 10 | Rad21      |
| 0.480809051  | 0.470184746 | 3.52E-05 | 10 | Copz1      |
| 0.361174025  | 0.475990634 | 3.56E-05 | 10 | Slc12a6    |
| 0.51018671   | 0.476898879 | 3.57E-05 | 10 | Ufm1       |
| -1.745793838 | 0.478260624 | 3.58E-05 | 10 | Hpcal1     |
| 0.466693068  | 0.479350935 | 3.59E-05 | 10 | Ccl12      |
| -0.649837923 | 0.481044408 | 3.60E-05 | 10 | Hsp90ab1   |
| 0.54811487   | 0.482049265 | 3.61E-05 | 10 | Tmem43     |
| 0.493425237  | 0.487006607 | 3.65E-05 | 10 | Hn1        |
| 0.633205981  | 0.491327364 | 3.68E-05 | 10 | Lhfp12     |
| 0.821392725  | 0.507138699 | 3.80E-05 | 10 | Lars       |
| 0.34338066   | 0.507165513 | 3.80E-05 | 10 | Tlr8       |
| 0.343032168  | 0.509494205 | 3.82E-05 | 10 | Aldh9a1    |
| 0.266418329  | 0.510241524 | 3.82E-05 | 10 | Nup50      |
| 0.516806204  | 0.510311735 | 3.82E-05 | 10 | Bud31      |
| 0.66331493   | 0.514640628 | 3.85E-05 | 10 | Spns1      |
| 0.479350893  | 0.517275332 | 3.87E-05 | 10 | Nrbp1      |
| -2.051408018 | 0.517717841 | 3.88E-05 | 10 | Cnpy2      |
| 0.314532067  | 0.518846044 | 3.89E-05 | 10 | Arcp1a     |
| 0.296816474  | 0.520992297 | 3.90E-05 | 10 | Tomm70a    |
| 0.325073829  | 0.525649742 | 3.94E-05 | 10 | Sec31a     |
| 0.550001695  | 0.527145052 | 3.95E-05 | 10 | Eif1ax     |
| 0.357905814  | 0.534833886 | 4.01E-05 | 10 | Dcxr       |
| 0.618973073  | 0.536251065 | 4.02E-05 | 10 | Kdm7a      |
| 0.434138195  | 0.536293903 | 4.02E-05 | 10 | Gpr35      |
| 0.584171828  | 0.537432309 | 4.03E-05 | 10 | Ilk        |
| 0.337654537  | 0.537777153 | 4.03E-05 | 10 | Ppp1r7     |
| 0.477449158  | 0.538495998 | 4.03E-05 | 10 | Stra13     |
| 1.046872188  | 0.559549209 | 4.19E-05 | 10 | Ubp1       |
| 0.385034222  | 0.561475337 | 4.21E-05 | 10 | Myd88      |
| 0.355251456  | 0.58380809  | 4.37E-05 | 10 | Tmem134    |
| 0.485330722  | 0.592164142 | 4.44E-05 | 10 | Txnl4a     |
| 0.308168067  | 0.601412667 | 4.50E-05 | 10 | Endod1     |
| 0.467533392  | 0.60316641  | 4.52E-05 | 10 | Chd7       |
| 0.331659536  | 0.604144828 | 4.52E-05 | 10 | Nap1l4     |
| 0.588885012  | 0.60441754  | 4.53E-05 | 10 | Anxa1      |
| 0.425540481  | 0.614015794 | 4.60E-05 | 10 | Trmt10b    |
| 0.453283016  | 0.627762473 | 4.70E-05 | 10 | Rnf187     |
| 0.58645452   | 0.644107406 | 4.82E-05 | 10 | Osbp18     |
| 0.539264772  | 0.647875567 | 4.85E-05 | 10 | H13        |
| 0.482963147  | 0.648229582 | 4.85E-05 | 10 | Hsd17b12   |
| -1.158324738 | 0.661542007 | 4.95E-05 | 10 | Comt       |
| -0.410576251 | 0.668492631 | 5.01E-05 | 10 | Calm1      |
| 0.472842725  | 0.674722096 | 5.05E-05 | 10 | Ctbp1      |
| 0.549150731  | 0.682811814 | 5.11E-05 | 10 | Gpr137b-ps |

|              |             |          |    |          |
|--------------|-------------|----------|----|----------|
| 0.305358756  | 0.686345245 | 5.14E-05 | 10 | Wdr45b   |
| 0.331312494  | 0.689354196 | 5.16E-05 | 10 | Dgkz     |
| 0.477838643  | 0.692269948 | 5.18E-05 | 10 | Slfn2    |
| 0.387046726  | 0.692934975 | 5.19E-05 | 10 | Dnajb11  |
| 0.446532353  | 0.697087824 | 5.22E-05 | 10 | Rab11b   |
| 0.500931116  | 0.735899509 | 5.51E-05 | 10 | Wwc2     |
| 0.28262243   | 0.73865066  | 5.53E-05 | 10 | Taf7     |
| 0.539387096  | 0.74254736  | 5.56E-05 | 10 | Ubap2    |
| 0.288964946  | 0.755886461 | 5.66E-05 | 10 | Arf2     |
| -0.942918728 | 0.756035746 | 5.66E-05 | 10 | Gm1821   |
| 0.338190745  | 0.756702079 | 5.67E-05 | 10 | Sertad2  |
| -2.030272469 | 0.768841325 | 5.76E-05 | 10 | Fam89b   |
| 0.359645801  | 0.770945216 | 5.77E-05 | 10 | Coa5     |
| 0.29551179   | 0.77642605  | 5.82E-05 | 10 | Ube2j1   |
| 0.349225859  | 0.780666437 | 5.85E-05 | 10 | Zc3h13   |
| 0.334494619  | 0.782943511 | 5.86E-05 | 10 | Chordc1  |
| 0.423251292  | 0.784783987 | 5.88E-05 | 10 | Cflar    |
| 0.272704425  | 0.791448545 | 5.93E-05 | 10 | Ptbp2    |
| 0.44534733   | 0.793344304 | 5.94E-05 | 10 | Rpap3    |
| 0.308044204  | 0.81725222  | 6.12E-05 | 10 | Sdhc     |
| 0.298011371  | 0.820587754 | 6.15E-05 | 10 | Lrch3    |
| 0.35415181   | 0.820771421 | 6.15E-05 | 10 | C1qbp    |
| 0.267983035  | 0.82429489  | 6.17E-05 | 10 | Spag7    |
| -0.715961858 | 0.826554525 | 6.19E-05 | 10 | Rpl14    |
| 0.290284208  | 0.830181887 | 6.22E-05 | 10 | Tab3     |
| 0.519281949  | 0.834851357 | 6.25E-05 | 10 | Trip12   |
| 0.491947843  | 0.843095151 | 6.31E-05 | 10 | Rpp21    |
| 0.517563993  | 0.850859625 | 6.37E-05 | 10 | Rnh1     |
| 0.499199844  | 0.856313234 | 6.41E-05 | 10 | Polr2f   |
| 1.310902442  | 0.868363752 | 6.50E-05 | 10 | Mgp      |
| 0.321500736  | 0.882612653 | 6.61E-05 | 10 | Peo1     |
| 0.980316564  | 0.897418877 | 6.72E-05 | 10 | Gm4832   |
| 0.323384851  | 0.909993269 | 6.82E-05 | 10 | Sltm     |
| 0.31110059   | 0.917839583 | 6.87E-05 | 10 | Rbm8a    |
| 0.535260357  | 0.930534119 | 6.97E-05 | 10 | Sdf4     |
| -1.851478704 | 0.936684584 | 7.02E-05 | 10 | Nipa2    |
| -2.098694992 | 0.940874751 | 7.05E-05 | 10 | Tmbim4   |
| 0.549816478  | 0.96263062  | 7.21E-05 | 10 | Plbd1    |
| 0.26749811   | 0.96819569  | 7.25E-05 | 10 | Raph1    |
| -0.458057132 | 0.979388287 | 7.34E-05 | 10 | Malat1   |
| 0.532728259  | 0.979396352 | 7.34E-05 | 10 | Dnttip2  |
| -1.950610117 | 1           | 7.50E-05 | 10 | Blvra    |
| 0.441737996  | 1           | 7.50E-05 | 10 | Usp16    |
| 0.264068736  | 1           | 7.55E-05 | 10 | Col4a3bp |
| -1.925277507 | 1           | 7.59E-05 | 10 | Ppp1r11  |
| -0.875146431 | 1           | 7.63E-05 | 10 | Junb     |
| 0.450027443  | 1           | 7.69E-05 | 10 | Gspt1    |
| 0.466102045  | 1           | 7.83E-05 | 10 | Ifi35    |
| 0.585239008  | 1           | 7.87E-05 | 10 | Rbx1     |
| 0.466918321  | 1           | 7.90E-05 | 10 | Pbrm1    |
| 0.368389252  | 1           | 7.92E-05 | 10 | Med13    |
| 0.558993715  | 1           | 7.93E-05 | 10 | Bag6     |
| 0.416947252  | 1           | 7.94E-05 | 10 | Arhgap22 |
| 0.518305274  | 1           | 8.06E-05 | 10 | H2-DMa   |
| 0.388360773  | 1           | 8.13E-05 | 10 | Rpn1     |
| 0.335834167  | 1           | 8.15E-05 | 10 | Sgk3     |
| 0.372223613  | 1           | 8.22E-05 | 10 | Zfr      |
| 0.460316582  | 1           | 8.22E-05 | 10 | Cnppd1   |
| 0.369747026  | 1           | 8.23E-05 | 10 | Fbxw5    |
| 0.524446178  | 1           | 8.24E-05 | 10 | H2-DMb1  |
| 0.381757972  | 1           | 8.29E-05 | 10 | Pld2     |

|              |   |           |    |               |
|--------------|---|-----------|----|---------------|
| -2.088557375 | 1 | 8.36E-05  | 10 | Irf2          |
| -0.928533854 | 1 | 8.47E-05  | 10 | Rpl18a        |
| 0.461160895  | 1 | 8.48E-05  | 10 | Plin2         |
| 0.457984644  | 1 | 8.53E-05  | 10 | Gsto1         |
| 0.406041561  | 1 | 8.54E-05  | 10 | Sh3pxd2b      |
| 0.44847872   | 1 | 8.58E-05  | 10 | Slc25a39      |
| -0.436095718 | 1 | 8.66E-05  | 10 | NP-904340.1   |
| 0.461687322  | 1 | 8.72E-05  | 10 | Csf2ra        |
| -0.340801256 | 1 | 8.78E-05  | 10 | Fth1          |
| 0.371993136  | 1 | 8.85E-05  | 10 | Spty2d1       |
| 0.638993947  | 1 | 9.05E-05  | 10 | Fundc2        |
| 0.409941495  | 1 | 9.06E-05  | 10 | Aph1c         |
| 0.598815743  | 1 | 9.16E-05  | 10 | Npc1          |
| 0.280787893  | 1 | 9.18E-05  | 10 | Hscb          |
| 0.37356912   | 1 | 9.22E-05  | 10 | Micu3         |
| 0.56076009   | 1 | 9.23E-05  | 10 | Eva1b         |
| 0.27194707   | 1 | 9.26E-05  | 10 | Hnrnp2        |
| -1.984311634 | 1 | 9.49E-05  | 10 | F11r          |
| 0.388899149  | 1 | 9.76E-05  | 10 | Tnfaip1       |
| 0.517161061  | 1 | 9.85E-05  | 10 | Il7r          |
| 0.474819291  | 1 | 0.0001012 | 10 | Nckap1l       |
| 0.489724209  | 1 | 0.0001015 | 10 | Lonrf3        |
| -0.762311045 | 1 | 0.0001015 | 10 | H2-K1         |
| 0.310387801  | 1 | 0.0001024 | 10 | Gmfb          |
| 0.461717052  | 1 | 0.0001035 | 10 | Otud5         |
| -0.570288434 | 1 | 0.000104  | 10 | Rps4x         |
| 0.3553659    | 1 | 0.0001055 | 10 | Ube3a         |
| 0.541721573  | 1 | 0.0001064 | 10 | Mgrn1         |
| 0.306185544  | 1 | 0.000107  | 10 | Rnf138        |
| 0.35935606   | 1 | 0.0001076 | 10 | Smc3          |
| 0.336016785  | 1 | 0.0001095 | 10 | Spg21         |
| 0.448177501  | 1 | 0.0001102 | 10 | Brd4          |
| 0.318476845  | 1 | 0.0001105 | 10 | Sp4           |
| 0.328828882  | 1 | 0.0001108 | 10 | Dock5         |
| 0.442059274  | 1 | 0.0001112 | 10 | Slc39a7       |
| 0.893746653  | 1 | 0.0001121 | 10 | Zeb1          |
| 0.280731059  | 1 | 0.0001122 | 10 | Slc35f6       |
| 0.392928634  | 1 | 0.0001169 | 10 | Inpp5d        |
| 0.363031835  | 1 | 0.0001177 | 10 | Fkbp8         |
| -1.983385892 | 1 | 0.0001182 | 10 | Slc25a12      |
| 1.350138066  | 1 | 0.0001201 | 10 | 8430419L09Rik |
| 0.284792478  | 1 | 0.0001205 | 10 | Bcl2l1        |
| 0.360751827  | 1 | 0.0001219 | 10 | Ddx17         |
| 0.317799188  | 1 | 0.0001219 | 10 | Gabarapl1     |
| 0.537732064  | 1 | 0.0001224 | 10 | Zcchc6        |
| 0.435581453  | 1 | 0.0001241 | 10 | Zmiz1         |
| 0.39729198   | 1 | 0.0001277 | 10 | Adrm1         |
| 0.519172852  | 1 | 0.0001296 | 10 | Tnfrsf12a     |
| -1.902918789 | 1 | 0.0001306 | 10 | Map3k8        |
| 0.401745362  | 1 | 0.0001314 | 10 | Galnt6        |
| 0.394540567  | 1 | 0.0001318 | 10 | Rexo2         |
| 0.408878985  | 1 | 0.0001328 | 10 | Glrx3         |
| 0.497658847  | 1 | 0.000133  | 10 | Anapc13       |
| 0.353635315  | 1 | 0.0001389 | 10 | Poc1b         |
| 0.355889089  | 1 | 0.0001401 | 10 | Bmp2k         |
| 0.296599576  | 1 | 0.0001419 | 10 | Nasp          |
| 0.398831424  | 1 | 0.0001421 | 10 | Uso1          |
| 0.424618679  | 1 | 0.0001473 | 10 | Ccdc88a       |
| 0.401396473  | 1 | 0.0001509 | 10 | 2310022B05Rik |
| 0.483044579  | 1 | 0.0001531 | 10 | Axl           |
| 0.282368294  | 1 | 0.0001543 | 10 | Havcr2        |

|              |   |           |    |               |
|--------------|---|-----------|----|---------------|
| -1.772014533 | 1 | 0.0001567 | 10 | Cmtm6         |
| 0.418297553  | 1 | 0.0001585 | 10 | Fnip1         |
| -1.795949397 | 1 | 0.0001591 | 10 | Lpcat2        |
| -1.829036727 | 1 | 0.0001628 | 10 | Galnt7        |
| -1.769068058 | 1 | 0.0001629 | 10 | Yme1l1        |
| 0.332272367  | 1 | 0.0001667 | 10 | Eif3a         |
| -1.823463094 | 1 | 0.0001686 | 10 | Dlgap4        |
| 0.443875544  | 1 | 0.0001694 | 10 | Bcap31        |
| 0.375318661  | 1 | 0.0001696 | 10 | B4galt5       |
| -1.796429371 | 1 | 0.0001698 | 10 | Stxbp2        |
| 0.292667283  | 1 | 0.0001725 | 10 | Nol7          |
| 0.524289776  | 1 | 0.0001727 | 10 | Csf2rb2       |
| 0.568289697  | 1 | 0.000175  | 10 | Vav3          |
| 0.493578154  | 1 | 0.000176  | 10 | Prpsap1       |
| 0.357284833  | 1 | 0.0001806 | 10 | Skil          |
| 0.408119475  | 1 | 0.0001824 | 10 | E030024N20Rik |
| -1.828631886 | 1 | 0.000184  | 10 | Sec61a1       |
| 0.491783385  | 1 | 0.0001846 | 10 | Fnip2         |
| -1.661090979 | 1 | 0.0001849 | 10 | Mcfcd2        |
| 0.351439694  | 1 | 0.0001864 | 10 | Tbc1d9        |
| 0.306664523  | 1 | 0.0001888 | 10 | Farsa         |
| 0.326466517  | 1 | 0.0001897 | 10 | Ubp2l         |
| 0.351729507  | 1 | 0.0001904 | 10 | Idh3b         |
| 0.2746254    | 1 | 0.0001913 | 10 | Nrd1          |
| 0.361109686  | 1 | 0.0001948 | 10 | Tpp2          |
| 0.385470799  | 1 | 0.0001962 | 10 | Zbtb7a        |
| 0.360099938  | 1 | 0.0001993 | 10 | Cdc16         |
| -0.377077785 | 1 | 0.0002052 | 10 | Eef1a1        |
| 0.468344686  | 1 | 0.0002084 | 10 | Lgals3bp      |
| 0.486562236  | 1 | 0.0002088 | 10 | Ankrd11       |
| 0.457921378  | 1 | 0.0002089 | 10 | Golga3        |
| 0.443503258  | 1 | 0.0002103 | 10 | Txnrd1        |
| 0.437388647  | 1 | 0.0002109 | 10 | Sel1l         |
| 0.296391744  | 1 | 0.000211  | 10 | Acadsb        |
| -1.117139515 | 1 | 0.0002125 | 10 | Rps15a-ps6    |
| 0.337535896  | 1 | 0.0002222 | 10 | Dag1          |
| -2.043582818 | 1 | 0.0002227 | 10 | Cfh           |
| 0.425175729  | 1 | 0.0002265 | 10 | Azin1         |
| 0.251141556  | 1 | 0.0002298 | 10 | Tial1         |
| 0.281845731  | 1 | 0.0002314 | 10 | Bcl2l11       |
| 0.327424661  | 1 | 0.0002315 | 10 | Arhgdia       |
| 0.468039747  | 1 | 0.0002321 | 10 | Zc3h12c       |
| 0.44149093   | 1 | 0.0002333 | 10 | D19Bwg1357e   |
| -1.593412757 | 1 | 0.0002361 | 10 | Trim8         |
| -0.342285346 | 1 | 0.0002365 | 10 | Fcer1g        |
| 0.385170149  | 1 | 0.0002366 | 10 | Hipk1         |
| 0.265625258  | 1 | 0.000241  | 10 | Rtf1          |
| 0.488794952  | 1 | 0.0002433 | 10 | Tes           |
| 0.405102814  | 1 | 0.0002436 | 10 | Sdha          |
| 0.406399611  | 1 | 0.000247  | 10 | Ddx10         |
| 0.305249299  | 1 | 0.00025   | 10 | Mkln1         |
| 0.453898339  | 1 | 0.000254  | 10 | Gtf2h3        |
| -0.378232422 | 1 | 0.0002542 | 10 | H2-D1         |
| 0.54576978   | 1 | 0.0002561 | 10 | Bri3          |
| 0.265144288  | 1 | 0.0002567 | 10 | Mapk1         |
| -1.382217666 | 1 | 0.0002612 | 10 | Ndufa11       |
| 0.363094991  | 1 | 0.0002628 | 10 | Bicd2         |
| -1.74278444  | 1 | 0.0002638 | 10 | Irak1         |
| -0.410587066 | 1 | 0.0002653 | 10 | Itm2b         |
| 0.452951291  | 1 | 0.0002656 | 10 | Pik3r5        |
| -1.904687433 | 1 | 0.0002668 | 10 | Yipf1         |

|              |   |           |    |               |        |
|--------------|---|-----------|----|---------------|--------|
| -1.839998704 | 1 | 0.0002696 | 10 | Rit1          |        |
| 0.592370961  | 1 | 0.0002704 | 10 | Abca2         |        |
| 0.358162799  | 1 | 0.0002737 | 10 | Scamp3        |        |
| 0.489883446  | 1 | 0.0002802 | 10 | Gpd2          |        |
| 0.461022801  | 1 | 0.0002824 | 10 | Lmna          |        |
| -1.460407524 | 1 | 0.0002852 | 10 | Atp5k         |        |
| 0.506991915  | 1 | 0.0002863 | 10 | Strbp         |        |
| -1.545582918 | 1 | 0.0002878 | 10 | Ndufa6        |        |
| 0.336776284  | 1 | 0.0002894 | 10 | Larp4b        |        |
| 0.402266107  | 1 | 0.0002909 | 10 | Psmc2         |        |
| 0.401976609  | 1 | 0.0002917 | 10 | Cops6         |        |
| -0.437693912 | 1 | 0.000292  | 10 | Mir682        |        |
| 0.444639014  | 1 | 0.0002924 | 10 | 0610010K14Rik |        |
| 0.290685562  | 1 | 0.0002944 | 10 | Snx10         |        |
| 0.268803703  | 1 | 0.0003016 | 10 | Man1a         |        |
| -0.300538797 | 1 | 0.0003026 | 10 | Hcar2         |        |
| 0.674658192  | 1 | 0.0003044 | 10 | Aup1          |        |
| -1.971272599 | 1 | 0.0003045 | 10 | Idnk          |        |
| 0.435239227  | 1 | 0.0003077 | 10 | Psma2         |        |
| -0.380902557 | 1 | 0.0003122 | 10 | Tyrobp        |        |
| -1.849060323 | 1 | 0.000313  | 10 | Pkn1          |        |
| 0.275160846  | 1 | 0.0003169 | 10 | Ptafr         |        |
| -1.795518421 | 1 | 0.000318  | 10 | Mpp1          |        |
| -2.035901992 | 1 | 0.0003184 | 10 | Tap1          |        |
| 0.398379732  | 1 | 0.000321  | 10 | Synj1         |        |
| -0.701984762 | 1 | 0.0003316 | 10 | Ssu72         |        |
| -0.410315503 | 1 | 0.000332  | 10 | Ctss          |        |
| -1.889896154 | 1 | 0.0003348 | 10 | Usp47         |        |
| 0.377211716  | 1 | 0.0003392 | 10 | Necap2        |        |
| 0.605515003  | 1 | 0.0003406 | 10 | Tomm40        |        |
| 0.582865109  | 1 | 0.0003446 | 10 | Tbxas1        |        |
| -1.898513245 | 1 | 0.0003487 | 10 | Elof1         |        |
| 0.307572822  | 1 | 0.0003499 | 10 | Atp7a         |        |
| -0.589438395 | 1 | 0.000351  | 10 | Cfl1          |        |
| 0.590677148  | 1 | 0.0003568 | 10 | Adh5          |        |
| -2.009954901 | 1 | 0.0003615 | 10 | Atp6v0d2      |        |
| -1.27933489  | 1 | 0.0003628 | 10 | Slamf9        |        |
| 0.437849773  | 1 | 0.0003663 | 10 | Huwe1         |        |
| -1.946459449 | 1 | 0.0003667 | 10 | Mbp           |        |
| 0.345716208  | 1 | 0.0003713 | 10 | Cpne3         |        |
| 0.31153216   | 1 | 0.000374  | 10 | Rars          |        |
| 0.380663577  | 1 | 0.0003743 | 10 | Fam32a        |        |
| -1.839349716 | 1 | 0.0003814 | 10 | Emg1          |        |
| 0.409446348  | 1 | 0.0003852 | 10 | Abcf1         |        |
| 0.434621879  | 1 | 0.0003928 | 10 |               | Sep.06 |
| 0.358124888  | 1 | 0.0003944 | 10 | Cct6a         |        |
| -1.525789174 | 1 | 0.0003953 | 10 | Cul1          |        |
| 0.34946342   | 1 | 0.0003975 | 10 | Mitf          |        |
| 0.443752522  | 1 | 0.0003981 | 10 | Lasp1         |        |
| -1.81199145  | 1 | 0.0003997 | 10 | Anxa6         |        |
| 0.375964714  | 1 | 0.0004045 | 10 | Napa          |        |
| -1.815813458 | 1 | 0.0004079 | 10 | Impact        |        |
| 0.415294344  | 1 | 0.0004139 | 10 | Nars          |        |
| 0.454334159  | 1 | 0.0004221 | 10 | Atp1a1        |        |
| 0.649531016  | 1 | 0.0004263 | 10 | Nampt         |        |
| -1.967752537 | 1 | 0.000427  | 10 | Il21r         |        |
| 0.336369678  | 1 | 0.0004362 | 10 | Cd164         |        |
| -0.425545828 | 1 | 0.0004364 | 10 | C1qb          |        |
| -1.440421677 | 1 | 0.0004375 | 10 | Grcc10        |        |
| 0.369747026  | 1 | 0.0004429 | 10 | Sec11a        |        |
| 0.869461178  | 1 | 0.0004441 | 10 | Sparc         |        |



|              |   |           |    |             |
|--------------|---|-----------|----|-------------|
| -1.677208884 | 1 | 0.0004452 | 10 | Daglb       |
| 0.462783276  | 1 | 0.000447  | 10 | Myo1e       |
| 0.318865219  | 1 | 0.00045   | 10 | Cbr2        |
| 0.433367215  | 1 | 0.0004509 | 10 | Dync1i2     |
| 0.318552903  | 1 | 0.0004539 | 10 | Tubb6       |
| 0.277281798  | 1 | 0.0004546 | 10 | Cyb5b       |
| 0.551897364  | 1 | 0.0004594 | 10 | Qsox1       |
| 0.318195398  | 1 | 0.000464  | 10 | Coro2a      |
| -1.993391241 | 1 | 0.000472  | 10 | Ly6a        |
| 0.397807421  | 1 | 0.0004723 | 10 | Actn1       |
| 0.554468338  | 1 | 0.0004732 | 10 | Psap        |
| 0.295879313  | 1 | 0.0004755 | 10 | Slc48a1     |
| -2.024708271 | 1 | 0.0004774 | 10 | Abca9       |
| 0.366190011  | 1 | 0.0004784 | 10 | Xylt2       |
| 0.279466194  | 1 | 0.0004836 | 10 | Ppp2r4      |
| -1.514755228 | 1 | 0.0004909 | 10 | Hsph1       |
| 0.360159718  | 1 | 0.0005008 | 10 | Eif4h       |
| 0.315617309  | 1 | 0.0005123 | 10 | Rp9         |
| -1.629800607 | 1 | 0.0005231 | 10 | Ccr5        |
| 0.276747205  | 1 | 0.0005293 | 10 | Sec14l1     |
| -1.868279822 | 1 | 0.0005314 | 10 | Ubash3b     |
| -1.73698791  | 1 | 0.0005375 | 10 | Fkbp15      |
| 0.394272326  | 1 | 0.0005376 | 10 | Plcl1       |
| -1.716220493 | 1 | 0.0005378 | 10 | Atg12       |
| -1.720763877 | 1 | 0.0005471 | 10 | Pon3        |
| -1.056389169 | 1 | 0.0005475 | 10 | Sat1        |
| -1.755035636 | 1 | 0.0005476 | 10 | Wls         |
| -1.852685705 | 1 | 0.0005481 | 10 | Mrps34      |
| 0.39802184   | 1 | 0.0005559 | 10 | Cox7b       |
| 0.323403169  | 1 | 0.0005584 | 10 | Wdr26       |
| 0.271330815  | 1 | 0.0005585 | 10 | Dhx8        |
| -1.565684361 | 1 | 0.0005587 | 10 | Bdp1        |
| 0.364493789  | 1 | 0.0005601 | 10 | Cox8a       |
| -0.899274987 | 1 | 0.0005682 | 10 | Rpl18       |
| 0.435265971  | 1 | 0.000572  | 10 | Mdh2        |
| 0.28126384   | 1 | 0.0005756 | 10 | Grpel1      |
| 0.366523181  | 1 | 0.0005789 | 10 | Qk          |
| 0.41939352   | 1 | 0.0005818 | 10 | Mrps16      |
| 0.359071849  | 1 | 0.0005847 | 10 | Tln1        |
| 0.304778179  | 1 | 0.0005863 | 10 | Tuba4a      |
| 0.567456912  | 1 | 0.0005888 | 10 | Prdm15      |
| 0.426222491  | 1 | 0.0005977 | 10 | Psmc3       |
| -0.367983905 | 1 | 0.0006051 | 10 | NP-904328.1 |
| -1.690232662 | 1 | 0.0006092 | 10 | Spcs3       |
| 0.381122003  | 1 | 0.0006149 | 10 | Mbnl2       |
| 0.255804942  | 1 | 0.0006308 | 10 | Pold1       |
| 0.37106055   | 1 | 0.0006312 | 10 | Uqcr10      |
| -0.25019634  | 1 | 0.000634  | 10 | Ubac2       |
| -1.805289321 | 1 | 0.000636  | 10 | H2-Ke6      |
| 0.307318047  | 1 | 0.0006493 | 10 | Vps51       |
| -1.381605129 | 1 | 0.0006673 | 10 | Rhob        |
| 0.271410493  | 1 | 0.0006751 | 10 | Ythdc1      |
| 0.353821245  | 1 | 0.000676  | 10 | Ube3c       |
| -1.8857576   | 1 | 0.0006778 | 10 | Dcaf11      |
| -1.760861171 | 1 | 0.0006794 | 10 | Tbc1d22a    |
| 0.359515134  | 1 | 0.0006883 | 10 | Clec12a     |
| 1.430816167  | 1 | 0.000704  | 10 | Rassf1      |
| 0.253127059  | 1 | 0.0007062 | 10 | Trp53inp2   |
| 0.37112981   | 1 | 0.0007067 | 10 | Snrbp       |
| 0.278692096  | 1 | 0.000707  | 10 | Ankrd40     |
| -1.777556519 | 1 | 0.0007119 | 10 | Smim11      |

|              |   |           |    |               |
|--------------|---|-----------|----|---------------|
| 0.426180245  | 1 | 0.0007126 | 10 | Paf1          |
| -1.791118238 | 1 | 0.0007131 | 10 | Coq10b        |
| 0.380372006  | 1 | 0.0007269 | 10 | Rab1          |
| 0.351916635  | 1 | 0.0007282 | 10 | Skap2         |
| 0.36688455   | 1 | 0.0007325 | 10 | Tlr2          |
| -1.163722529 | 1 | 0.0007442 | 10 | Gm6402        |
| 0.2647133    | 1 | 0.0007451 | 10 | Ccl7          |
| 0.432629255  | 1 | 0.0007454 | 10 | Cuta          |
| 0.410097409  | 1 | 0.0007533 | 10 | Dynlrb1       |
| 0.38447341   | 1 | 0.0007583 | 10 | Ppib          |
| 0.258234026  | 1 | 0.0007702 | 10 | Ptplad2       |
| -1.692742749 | 1 | 0.0007747 | 10 | Samhd1        |
| -1.717159821 | 1 | 0.0007762 | 10 | Ppp1r9b       |
| -1.751938576 | 1 | 0.0007809 | 10 | Lin7c         |
| 0.298900723  | 1 | 0.0007904 | 10 | Park7         |
| -1.620319427 | 1 | 0.000802  | 10 | Rgl2          |
| 0.336205376  | 1 | 0.0008024 | 10 | Coa3          |
| 0.299366229  | 1 | 0.000817  | 10 | Yipf3         |
| -0.749943865 | 1 | 0.0008175 | 10 | Alox5ap       |
| -1.915507584 | 1 | 0.0008177 | 10 | Hes1          |
| -1.266359228 | 1 | 0.0008199 | 10 | Tgif1         |
| -1.297369999 | 1 | 0.000821  | 10 | Rpl38         |
| -1.864825232 | 1 | 0.0008229 | 10 | Dok2          |
| -1.859388163 | 1 | 0.0008427 | 10 | Ptger4        |
| -1.585781164 | 1 | 0.0008462 | 10 | Gltscr2       |
| 0.438108905  | 1 | 0.0008468 | 10 | Aip           |
| -1.775837444 | 1 | 0.0008552 | 10 | BC004004      |
| -1.809391568 | 1 | 0.0008585 | 10 | Pop5          |
| -1.846913057 | 1 | 0.0008669 | 10 | Tcerg1        |
| -1.77511531  | 1 | 0.0008807 | 10 | Cd38          |
| -1.298784312 | 1 | 0.0008907 | 10 | Egr1          |
| -1.806449715 | 1 | 0.0008917 | 10 | Fcgr4         |
| 0.360238626  | 1 | 0.0008951 | 10 | Rps17         |
| 0.276168214  | 1 | 0.0008984 | 10 | Derl1         |
| -1.821385115 | 1 | 0.000903  | 10 | Tnfaip8l2     |
| 0.370691354  | 1 | 0.0009081 | 10 | Prpf40a       |
| -1.783875911 | 1 | 0.0009181 | 10 | Ncoa1         |
| -1.760118928 | 1 | 0.0009378 | 10 | Dpep2         |
| 0.443665753  | 1 | 0.0009405 | 10 | Eea1          |
| 0.304964434  | 1 | 0.0009451 | 10 | Cd86          |
| -1.65762248  | 1 | 0.0009509 | 10 | Adam10        |
| -1.777719055 | 1 | 0.0009781 | 10 | 1500011K16Rik |
| 0.520939206  | 1 | 0.0009869 | 10 | Tnpo2         |
| 0.356938637  | 1 | 0.0009941 | 10 | Cct4          |
| 0.595551508  | 1 | 0.0010146 | 10 | Pmepa1        |
| -0.481160303 | 1 | 0.001021  | 10 | Rps15         |
| 0.37464683   | 1 | 0.0010439 | 10 | Fam162a       |
| -1.761160214 | 1 | 0.0010497 | 10 | Naa60         |
| -1.654090324 | 1 | 0.0010595 | 10 | Apex1         |
| -0.577268955 | 1 | 0.0010663 | 10 | Pfn1          |
| 0.258000415  | 1 | 0.0010706 | 10 | Ggnbp2        |
| -1.054257003 | 1 | 0.0010754 | 10 | Rhog          |
| -1.665042413 | 1 | 0.0010843 | 10 | Eapp          |
| 0.364950853  | 1 | 0.0010956 | 10 | Clec4a3       |
| -1.61406091  | 1 | 0.0010977 | 10 | Hsd17b4       |
| 0.265043343  | 1 | 0.0011328 | 10 | Tgoln1        |
| 0.30832387   | 1 | 0.0011447 | 10 | Nfkbid        |
| 0.392848357  | 1 | 0.0011485 | 10 | Mrpl54        |
| 0.388091028  | 1 | 0.0011539 | 10 | Vps28         |
| -1.721563952 | 1 | 0.0011541 | 10 | Triap1        |
| -1.772253396 | 1 | 0.0011564 | 10 | Kdm2a         |

|              |   |           |    |               |
|--------------|---|-----------|----|---------------|
| 0.320402947  | 1 | 0.0011579 | 10 | Polr2j        |
| 0.279609083  | 1 | 0.0011614 | 10 | Herpud1       |
| -2.016737235 | 1 | 0.0011747 | 10 | C4b           |
| -1.666654017 | 1 | 0.0011877 | 10 | Hook3         |
| -1.694685531 | 1 | 0.0012188 | 10 | Pou2f2        |
| -1.684538039 | 1 | 0.0012369 | 10 | Prcp          |
| 0.35516952   | 1 | 0.0012376 | 10 | Tgfbr1        |
| 0.271122746  | 1 | 0.0012429 | 10 | Ctdsp2        |
| -0.459408252 | 1 | 0.0012701 | 10 | 1110004F10Rik |
| -1.635648179 | 1 | 0.0012783 | 10 | Sptssa        |
| 0.291604427  | 1 | 0.0012861 | 10 | Mmp12         |
| 0.294579236  | 1 | 0.0012876 | 10 | Clta          |
| 0.331628531  | 1 | 0.0012955 | 10 | Gpr108        |
| -1.772831459 | 1 | 0.001302  | 10 | Fam126a       |
| -1.695013965 | 1 | 0.0013213 | 10 | Sep.09        |
| 0.330754095  | 1 | 0.0013259 | 10 | Tpr           |
| -1.506211869 | 1 | 0.0013325 | 10 | Pqlc3         |
| 0.552416089  | 1 | 0.0013348 | 10 | Fam53c        |
| 0.286911698  | 1 | 0.001336  | 10 | Baz1a         |
| -1.596726343 | 1 | 0.0013364 | 10 | Il13ra1       |
| -1.675704663 | 1 | 0.0013468 | 10 | Hk3           |
| 0.287299919  | 1 | 0.0013597 | 10 | Dhx40         |
| 0.306385925  | 1 | 0.0013779 | 10 | Leprotl1      |
| 0.437391543  | 1 | 0.0013902 | 10 | Ncaph2        |
| 0.404051273  | 1 | 0.0013926 | 10 | Aimp1         |
| 0.286572902  | 1 | 0.0014325 | 10 | Ptp4a2        |
| 0.308927384  | 1 | 0.0014336 | 10 | Cpd           |
| -1.429888503 | 1 | 0.0014351 | 10 | Cebpb         |
| 0.336249788  | 1 | 0.001441  | 10 | Ube2k         |
| -1.50102555  | 1 | 0.0014555 | 10 | Rnf128        |
| -1.711667157 | 1 | 0.0014598 | 10 | Rnaseh2c      |
| 0.345864218  | 1 | 0.0014609 | 10 | Ezr           |
| -1.049004483 | 1 | 0.0014624 | 10 | Ywhah         |
| 0.593527092  | 1 | 0.0014743 | 10 | Plekhm1       |
| -0.922018871 | 1 | 0.0014951 | 10 | Mir703        |
| -1.553274479 | 1 | 0.0015005 | 10 | Nolc1         |
| -1.595884946 | 1 | 0.0015049 | 10 | Vcpip1        |
| 0.254451377  | 1 | 0.0015049 | 10 | Ppm1g         |
| -1.677362521 | 1 | 0.0015064 | 10 | Gars          |
| 0.335171978  | 1 | 0.0015313 | 10 | Pet100        |
| 0.378584034  | 1 | 0.001552  | 10 | Syk           |
| 0.259174205  | 1 | 0.0015528 | 10 | Frmd4b        |
| 0.268718069  | 1 | 0.0015666 | 10 | Lsm4          |
| -1.740850716 | 1 | 0.0015806 | 10 | Kat6a         |
| 0.367021848  | 1 | 0.001601  | 10 | Lipa          |
| 1.063574771  | 1 | 0.0016056 | 10 | 2310047M10Rik |
| 0.387812724  | 1 | 0.001614  | 10 | Chd8          |
| 0.317143007  | 1 | 0.0016195 | 10 | Glt25d1       |
| -1.872490575 | 1 | 0.0016222 | 10 | Stard8        |
| -1.573885463 | 1 | 0.0016247 | 10 | Ccpg1         |
| -1.833526072 | 1 | 0.0016281 | 10 | St8sia4       |
| -1.684081455 | 1 | 0.0016337 | 10 | Itpk1         |
| 0.564914385  | 1 | 0.0016352 | 10 | Pyroxd2       |
| -1.580761413 | 1 | 0.0016355 | 10 | Mtf2          |
| -1.033796969 | 1 | 0.0016484 | 10 | Eno1b         |
| -1.792362157 | 1 | 0.0016515 | 10 | Snrnp200      |
| -1.71518297  | 1 | 0.0016649 | 10 | Lbh           |
| -1.652902566 | 1 | 0.0016931 | 10 | Myo7a         |
| -1.537694008 | 1 | 0.0016978 | 10 | Rab12         |
| -1.873212671 | 1 | 0.0016983 | 10 | Samsn1        |
| 0.358047372  | 1 | 0.0017159 | 10 | Nme1          |

|              |   |           |    |               |
|--------------|---|-----------|----|---------------|
| -1.680226094 | 1 | 0.0017162 | 10 | Lima1         |
| 0.320505369  | 1 | 0.0017212 | 10 | Eif4g2        |
| -1.651218422 | 1 | 0.0017374 | 10 | Arl8a         |
| -1.905688936 | 1 | 0.0017461 | 10 | Ccr7          |
| -1.720581127 | 1 | 0.001761  | 10 | Atxn10        |
| -1.394434219 | 1 | 0.0017638 | 10 | Fau           |
| 0.265944787  | 1 | 0.0017754 | 10 | Hspa9         |
| 0.251332571  | 1 | 0.0018171 | 10 | Arfgef1       |
| -1.642741605 | 1 | 0.0018187 | 10 | Tnfrsf11a     |
| -1.128423193 | 1 | 0.0018188 | 10 | Agpat5        |
| 0.255501639  | 1 | 0.0018494 | 10 | Fn1           |
| 0.325610431  | 1 | 0.0018575 | 10 | Gm2a          |
| 0.310800199  | 1 | 0.001869  | 10 | Rpn2          |
| 0.32729175   | 1 | 0.0018727 | 10 | Cd2           |
| 0.303766874  | 1 | 0.0018844 | 10 | Ifi30         |
| -1.645094943 | 1 | 0.0018897 | 10 | Abcc1         |
| -1.654558348 | 1 | 0.001915  | 10 | Ubtd1         |
| 0.295988493  | 1 | 0.0019362 | 10 | Cyb5r4        |
| 0.333727911  | 1 | 0.0019364 | 10 | Txndc17       |
| -1.599761794 | 1 | 0.0019391 | 10 | Ypel5         |
| -1.596274734 | 1 | 0.0019482 | 10 | Csnk1g3       |
| -1.520461184 | 1 | 0.0019502 | 10 | Arid1b        |
| -0.405771639 | 1 | 0.001986  | 10 | Rpph1         |
| -1.683701152 | 1 | 0.002012  | 10 | Slc15a4       |
| -0.596080103 | 1 | 0.0020137 | 10 | Msn           |
| -1.542136272 | 1 | 0.0020442 | 10 | Ndufa9        |
| -1.623412612 | 1 | 0.0020574 | 10 | Cat           |
| -1.619070853 | 1 | 0.00206   | 10 | Pdpn          |
| 0.30187886   | 1 | 0.0020945 | 10 | 2010111101Rik |
| -1.594773217 | 1 | 0.002115  | 10 | Usp48         |
| -1.685228991 | 1 | 0.0021207 | 10 | Ppp4c         |
| 0.367646636  | 1 | 0.0021675 | 10 | Chchd1        |
| -1.715874772 | 1 | 0.0022028 | 10 | Ephx1         |
| -0.308872054 | 1 | 0.0022083 | 10 | Oxr1          |
| -0.471624375 | 1 | 0.0022311 | 10 | Lyz2          |
| -1.537885843 | 1 | 0.0022313 | 10 | Ppm1a         |
| 0.345590606  | 1 | 0.0022515 | 10 | Pim1          |
| -1.475826597 | 1 | 0.0022551 | 10 | Tnip2         |
| -1.751621669 | 1 | 0.0022573 | 10 | Bcl10         |
| -1.324869268 | 1 | 0.0022724 | 10 | Cast          |
| 0.292702194  | 1 | 0.0022818 | 10 | Rspry1        |
| -1.708855322 | 1 | 0.0023076 | 10 | Mrpl35        |
| 0.517365605  | 1 | 0.0023228 | 10 | Gm12338       |
| -1.511316091 | 1 | 0.0023289 | 10 | Sphk2         |
| -1.58569677  | 1 | 0.0023324 | 10 | Rabggtb       |
| 0.353188947  | 1 | 0.0023412 | 10 | Mtss1         |
| -1.434538448 | 1 | 0.0023525 | 10 | lqsec1        |
| -1.619070853 | 1 | 0.0023563 | 10 | Rpl27a        |
| 0.267883988  | 1 | 0.002362  | 10 | Jkamp         |
| 0.332732626  | 1 | 0.0023664 | 10 | Sdcbp         |
| -0.253683415 | 1 | 0.0023896 | 10 | Rassf2        |
| 0.365127248  | 1 | 0.0023924 | 10 | Glipr1        |
| -0.627325786 | 1 | 0.0024017 | 10 | Dusp1         |
| -1.585499823 | 1 | 0.0024154 | 10 | 4833420G17Rik |
| -1.598804656 | 1 | 0.0024183 | 10 | Zzef1         |
| 0.350733515  | 1 | 0.0024197 | 10 | Pfdn4         |
| -1.619959291 | 1 | 0.002422  | 10 | Med11         |
| -1.493947919 | 1 | 0.0024306 | 10 | Pcyox1        |
| -1.562165826 | 1 | 0.0024488 | 10 | Tec           |
| 0.389771051  | 1 | 0.0024735 | 10 | Ran           |
| -1.435678156 | 1 | 0.0025054 | 10 | Pik3cb        |

|              |   |           |    |               |
|--------------|---|-----------|----|---------------|
| 0.312894491  | 1 | 0.0025152 | 10 | Tpm4          |
| -0.781281324 | 1 | 0.0025199 | 10 | Rps2          |
| -1.605584343 | 1 | 0.002522  | 10 | Hsd3b7        |
| 0.313467282  | 1 | 0.0025253 | 10 | Cstb          |
| -1.682683444 | 1 | 0.0025427 | 10 | Usp15         |
| -1.076715014 | 1 | 0.002571  | 10 | 2900060B14Rik |
| -1.41939431  | 1 | 0.0025865 | 10 | Tspan31       |
| -1.638128152 | 1 | 0.0025897 | 10 | Sbf2          |
| 0.328668654  | 1 | 0.0026052 | 10 | Mrc1          |
| -1.196159093 | 1 | 0.0026166 | 10 | Akap13        |
| -1.403944627 | 1 | 0.0026324 | 10 | Slc16a6       |
| 0.302632585  | 1 | 0.0026761 | 10 | Fuca1         |
| -1.24366801  | 1 | 0.0026886 | 10 | Asph          |
| -2.007933275 | 1 | 0.0027044 | 10 | Mgl2          |
| 0.681030927  | 1 | 0.0027047 | 10 | Pold4         |
| -1.991658178 | 1 | 0.0027479 | 10 | Ltc4s         |
| 0.293101068  | 1 | 0.0028225 | 10 | Ctc1          |
| -1.522706217 | 1 | 0.0028299 | 10 | Nipsnap3b     |
| 0.307266848  | 1 | 0.0028449 | 10 | Cndp2         |
| -1.032695241 | 1 | 0.0028456 | 10 | Rps16         |
| -1.518923905 | 1 | 0.0028462 | 10 | 2510009E07Rik |
| -1.517659949 | 1 | 0.0028775 | 10 | N6amt2        |
| 0.27688112   | 1 | 0.0029109 | 10 | Ywhab         |
| -1.468184474 | 1 | 0.00294   | 10 | Cds2          |
| 0.273538361  | 1 | 0.0029754 | 10 | Srsf3         |
| -1.674705906 | 1 | 0.0029826 | 10 | Ddx47         |
| -0.300248957 | 1 | 0.0029957 | 10 | Atp11b        |
| 0.28454016   | 1 | 0.0030051 | 10 | Ppt1          |
| -0.995194876 | 1 | 0.0030261 | 10 | Adprh         |
| -1.691054824 | 1 | 0.0030448 | 10 | Acvrl1        |
| -1.646066512 | 1 | 0.0030459 | 10 | 1600002K03Rik |
| -0.605097666 | 1 | 0.0030581 | 10 | Lamp2         |
| -1.61076487  | 1 | 0.0030809 | 10 | Sumf1         |
| 0.299307885  | 1 | 0.0030877 | 10 | Stom          |
| -1.606934782 | 1 | 0.0030897 | 10 | Ccdc9         |
| -1.602877982 | 1 | 0.003109  | 10 | Vps13c        |
| -1.420788686 | 1 | 0.0031183 | 10 | Chmp1b        |
| -1.650453295 | 1 | 0.0031226 | 10 | Nsun2         |
| 0.654635043  | 1 | 0.0031258 | 10 | Ext1          |
| -1.29798132  | 1 | 0.0031512 | 10 | Hnrnp1        |
| -1.396168528 | 1 | 0.0031715 | 10 | Kcnab2        |
| -2.043889092 | 1 | 0.0031948 | 10 | Cd163         |
| -1.190155253 | 1 | 0.0032034 | 10 | Sumo1         |
| -1.482385651 | 1 | 0.0032299 | 10 | Commdd6       |
| -1.548993563 | 1 | 0.0032357 | 10 | Fam114a2      |
| -1.531887137 | 1 | 0.0032513 | 10 | Rassf3        |
| -0.315839595 | 1 | 0.0032537 | 10 | Ccng2         |
| 0.268997976  | 1 | 0.0032654 | 10 | Ctnna1        |
| 0.26708469   | 1 | 0.0032843 | 10 | Cox17         |
| -1.533968067 | 1 | 0.0032987 | 10 | Gyg           |
| -1.661745344 | 1 | 0.0033119 | 10 | Toporsos      |
| -1.333273055 | 1 | 0.0033412 | 10 | Igf1          |
| -1.692957241 | 1 | 0.0033484 | 10 | Bcl2          |
| -1.58879972  | 1 | 0.0033506 | 10 | Slc35b2       |
| -1.156893029 | 1 | 0.0033569 | 10 | Ap1s1         |
| -1.579176941 | 1 | 0.0033578 | 10 | Jade2         |
| -1.587049734 | 1 | 0.0034    | 10 | Acox3         |
| 0.330774016  | 1 | 0.0034469 | 10 | AF251705      |
| -1.612126602 | 1 | 0.0034881 | 10 | Tpgs1         |
| -1.383603367 | 1 | 0.0035263 | 10 | Ube2q1        |
| -1.634036712 | 1 | 0.003551  | 10 | Orai1         |

|              |   |           |    |          |        |
|--------------|---|-----------|----|----------|--------|
| -1.497646506 | 1 | 0.0035569 | 10 | Vps18    |        |
| -1.538107145 | 1 | 0.0035674 | 10 | Gstp1    |        |
| -1.745963855 | 1 | 0.0035821 | 10 | Fkbp4    |        |
| 0.339853553  | 1 | 0.0035831 | 10 | Sgpl1    |        |
| -1.597118752 | 1 | 0.0035873 | 10 | Mndal    |        |
| 0.392971366  | 1 | 0.0035928 | 10 | Plekkg2  |        |
| -1.569617019 | 1 | 0.0036232 | 10 | Snrpa1   |        |
| -0.97729686  | 1 | 0.0036814 | 10 | Marcks   |        |
| -1.404634758 | 1 | 0.0036881 | 10 | Cep250   |        |
| -1.482914871 | 1 | 0.0036957 | 10 | Ahcyl2   |        |
| 0.313289303  | 1 | 0.0036966 | 10 | Ehd4     |        |
| -1.253305571 | 1 | 0.0037395 | 10 | Al462493 |        |
| -1.553187296 | 1 | 0.0037531 | 10 | Tmem135  |        |
| -1.377483221 | 1 | 0.00379   | 10 | Taok3    |        |
| 0.287366864  | 1 | 0.0038228 | 10 | Timm13   |        |
| -1.473706299 | 1 | 0.0038257 | 10 | C1d      |        |
| -1.583528213 | 1 | 0.0038377 | 10 | Alox5    |        |
| -1.560305743 | 1 | 0.0038387 | 10 | Nr4a1    |        |
| -1.603839337 | 1 | 0.0038665 | 10 | Tlr13    |        |
| -1.700192276 | 1 | 0.0039075 | 10 | Pip5k1a  |        |
| 0.304559289  | 1 | 0.0039694 | 10 | Fmnl1    |        |
| -1.421949183 | 1 | 0.0039751 | 10 | Eif2b5   |        |
| -1.540273323 | 1 | 0.0040118 | 10 | Emc1     |        |
| -1.468848705 | 1 | 0.0040561 | 10 | Ppm1b    |        |
| -0.74124852  | 1 | 0.0040706 | 10 | Rhoa     |        |
| -1.539964156 | 1 | 0.0041251 | 10 | Klhdc4   |        |
| -0.825943377 | 1 | 0.004171  | 10 | Jund     |        |
| 0.26988482   | 1 | 0.0041993 | 10 |          | Sep.07 |
| -1.461517782 | 1 | 0.004201  | 10 | Rc3h2    |        |
| -1.742151663 | 1 | 0.0042086 | 10 | Sdccag3  |        |
| -1.304182457 | 1 | 0.00421   | 10 | Ptges3   |        |
| -1.659326374 | 1 | 0.0042143 | 10 | Trnau1ap |        |
| 0.80413246   | 1 | 0.0042369 | 10 | Puf60    |        |
| -1.568060329 | 1 | 0.004326  | 10 | Bst1     |        |
| 0.391017008  | 1 | 0.0043424 | 10 | Tubb5    |        |
| -1.671072582 | 1 | 0.0043566 | 10 | Ubtg     |        |
| -1.441573223 | 1 | 0.0043944 | 10 | Cant1    |        |
| -0.320135379 | 1 | 0.0044239 | 10 | Dpagt1   |        |
| -1.583640982 | 1 | 0.0044518 | 10 | Itch     |        |
| -1.47569517  | 1 | 0.0044557 | 10 | Gcc2     |        |
| -1.203808856 | 1 | 0.0044624 | 10 | Coro1a   |        |
| -1.491511597 | 1 | 0.0045103 | 10 | Vps36    |        |
| -1.491823132 | 1 | 0.0045228 | 10 | Dnlz     |        |
| -1.555834259 | 1 | 0.0045748 | 10 | Fbxl3    |        |
| -1.655783088 | 1 | 0.0046025 | 10 | Adap2    |        |
| 0.276152063  | 1 | 0.0046108 | 10 | Ndufb10  |        |
| -1.43072522  | 1 | 0.0046207 | 10 | Trak2    |        |
| 0.265130034  | 1 | 0.0046363 | 10 | Rgs1     |        |
| -1.686927765 | 1 | 0.0046694 | 10 | Tppp3    |        |
| -1.548584899 | 1 | 0.004694  | 10 | Ipo9     |        |
| -1.470175845 | 1 | 0.004708  | 10 | Dld      |        |
| -1.433709955 | 1 | 0.0047795 | 10 | Traf6    |        |
| -1.584337043 | 1 | 0.0047838 | 10 | Gga1     |        |
| 0.259964923  | 1 | 0.0048261 | 10 | H2-Ab1   |        |
| -0.612111917 | 1 | 0.0048935 | 10 | Rps3a1   |        |
| 0.40463784   | 1 | 0.0049156 | 10 | Stam2    |        |
| -1.391090533 | 1 | 0.0049395 | 10 | Ppp6c    |        |
| -1.663438242 | 1 | 0.0049663 | 10 | Batf3    |        |
| -1.422413005 | 1 | 0.0049691 | 10 | Kcnk13   |        |
| -1.485094946 | 1 | 0.0049715 | 10 | Wdr48    |        |
| -1.209807398 | 1 | 0.0050037 | 10 | Uap1l1   |        |

|              |   |           |    |               |
|--------------|---|-----------|----|---------------|
| -1.539286599 | 1 | 0.0050039 | 10 | Dlst          |
| -1.675772241 | 1 | 0.0050045 | 10 | Mocs2         |
| 0.383652267  | 1 | 0.0050279 | 10 | Ssr1          |
| -1.487921957 | 1 | 0.00506   | 10 | Uba7          |
| -1.543667864 | 1 | 0.0050635 | 10 | 1700123O20Rik |
| -1.491823132 | 1 | 0.0050638 | 10 | Tmem19        |
| -1.552082323 | 1 | 0.0050884 | 10 | Osbpl9        |
| -0.71637568  | 1 | 0.0051348 | 10 | Mbnl1         |
| -1.457943957 | 1 | 0.00515   | 10 | Pank2         |
| -1.407023532 | 1 | 0.0051678 | 10 | Casp1         |
| -0.63722403  | 1 | 0.0051799 | 10 | Rps18         |
| -1.307850078 | 1 | 0.0051958 | 10 | Bin2          |
| -0.483956881 | 1 | 0.0052217 | 10 | Mir692-1      |
| -1.671113479 | 1 | 0.005295  | 10 | Man2c1        |
| 0.627073326  | 1 | 0.005323  | 10 | Sik1          |
| -1.333481694 | 1 | 0.0053549 | 10 | Bola3         |
| -0.262679473 | 1 | 0.0054217 | 10 | Fbxo30        |
| -1.673134733 | 1 | 0.005424  | 10 | Plxdc2        |
| -0.379818515 | 1 | 0.0054274 | 10 | Brpf3         |
| -2.142279576 | 1 | 0.0054289 | 10 | Lyve1         |
| -1.500867121 | 1 | 0.0054473 | 10 | Bmyc          |
| -1.557537146 | 1 | 0.0054492 | 10 | Pdcd2l        |
| 0.255218172  | 1 | 0.0054641 | 10 | Mdm2          |
| -1.441142527 | 1 | 0.0054839 | 10 | Mgat4b        |
| -1.516394393 | 1 | 0.0055448 | 10 | Gxylt1        |
| -1.369717504 | 1 | 0.0055541 | 10 | Qrich1        |
| -1.514426    | 1 | 0.005612  | 10 | Skp1a         |
| -1.340300764 | 1 | 0.0056396 | 10 | Zfp644        |
| -0.603632673 | 1 | 0.0056417 | 10 | Gm6654        |
| -1.697378345 | 1 | 0.0056444 | 10 | Clec4b1       |
| -1.533155487 | 1 | 0.0056487 | 10 | Stard3nl      |
| 0.658105965  | 1 | 0.005654  | 10 | Kxd1          |
| -1.351314642 | 1 | 0.0056573 | 10 | Olfml3        |
| -1.307781225 | 1 | 0.0057397 | 10 | Arhgef1       |
| -1.533281873 | 1 | 0.0057754 | 10 | Clcn4-2       |
| -1.513878942 | 1 | 0.0058493 | 10 | Ube2a         |
| 0.258234605  | 1 | 0.0058532 | 10 | Rpl23         |
| -1.602038812 | 1 | 0.0058553 | 10 | Fibp          |
| -1.468184474 | 1 | 0.0058554 | 10 | Phyh          |
| -1.463967399 | 1 | 0.0058632 | 10 | Ccz1          |
| -1.3404458   | 1 | 0.0058902 | 10 | Ctage5        |
| -0.766361897 | 1 | 0.0059222 | 10 | Rps8          |
| -1.532226338 | 1 | 0.0059885 | 10 | Mxi1          |
| -1.561025081 | 1 | 0.0060163 | 10 | Milr1         |
| 0.369897277  | 1 | 0.0061217 | 10 | Mcm3          |
| -1.513576299 | 1 | 0.0061383 | 10 | Rbck1         |
| 0.27169336   | 1 | 0.0061517 | 10 | Zyx           |
| -1.478978719 | 1 | 0.0061847 | 10 | Nmi           |
| 0.253811679  | 1 | 0.0062059 | 10 | Cd63          |
| -1.090567193 | 1 | 0.0062551 | 10 | Nt5dc2        |
| -1.509823801 | 1 | 0.006284  | 10 | Rassf5        |
| -1.611088647 | 1 | 0.0062853 | 10 | Ift20         |
| -1.485965647 | 1 | 0.0062991 | 10 | Sh3bp5        |
| -1.601337426 | 1 | 0.0063082 | 10 | Rora          |
| -1.558510851 | 1 | 0.0063118 | 10 | Eif2b2        |
| 0.769404327  | 1 | 0.0063196 | 10 | Pygm          |
| -1.633028686 | 1 | 0.0064581 | 10 | Rab24         |
| -1.497464521 | 1 | 0.0064688 | 10 | Otub1         |
| 0.274924702  | 1 | 0.0064854 | 10 | Cript         |
| -1.517238274 | 1 | 0.0065281 | 10 | Vrk2          |
| -1.364176556 | 1 | 0.0065327 | 10 | Dpy19l1       |

|              |   |           |    |               |
|--------------|---|-----------|----|---------------|
| -1.469070017 | 1 | 0.0066461 | 10 | Rab5a         |
| -1.318931342 | 1 | 0.0066467 | 10 | Angptl2       |
| -1.371278337 | 1 | 0.0066933 | 10 | Ppp3ca        |
| -1.299235915 | 1 | 0.0066994 | 10 | Hmox1         |
| 0.293927479  | 1 | 0.0067045 | 10 | Rgs10         |
| -1.406671004 | 1 | 0.0067244 | 10 | Tra2a         |
| -1.417997986 | 1 | 0.0067486 | 10 | Prune2        |
| -1.678255943 | 1 | 0.0067787 | 10 | Itgb7         |
| -1.458049252 | 1 | 0.0068035 | 10 | Myo1c         |
| 0.782497624  | 1 | 0.0068638 | 10 | Il4ra         |
| -1.33018178  | 1 | 0.0068747 | 10 | Chchd4        |
| -1.441246818 | 1 | 0.0070018 | 10 | Eps15l1       |
| -1.346073148 | 1 | 0.0070102 | 10 | Snhg6         |
| -0.274129106 | 1 | 0.0070218 | 10 | Akip1         |
| -1.288724268 | 1 | 0.0070883 | 10 | Smim7         |
| -1.499794735 | 1 | 0.0071267 | 10 | Psmg4         |
| -1.523227133 | 1 | 0.0071299 | 10 | C5ar1         |
| -1.361525533 | 1 | 0.0071819 | 10 | Txndc15       |
| 0.277477902  | 1 | 0.0072065 | 10 | Senp5         |
| -1.448831528 | 1 | 0.0072852 | 10 | Extl3         |
| -1.349819874 | 1 | 0.007299  | 10 | 3110043O21Rik |
| -1.471721953 | 1 | 0.00739   | 10 | Atl2          |
| -1.547650183 | 1 | 0.0073981 | 10 | Usp8          |
| -1.271271935 | 1 | 0.0074023 | 10 | Dnajc19       |
| -1.409905915 | 1 | 0.0074768 | 10 | Pik3cg        |
| -1.37590403  | 1 | 0.0075237 | 10 | Hcfc1         |
| 0.252835783  | 1 | 0.0075329 | 10 | Med28         |
| 0.267345538  | 1 | 0.0075926 | 10 | Atp5b         |
| -1.246740158 | 1 | 0.0076351 | 10 | Cox7c         |
| -1.502213634 | 1 | 0.0077933 | 10 | Cmc1          |
| -1.443398112 | 1 | 0.0078091 | 10 | Swap70        |
| -1.252687638 | 1 | 0.0078147 | 10 | Ifngr1        |
| -1.333228241 | 1 | 0.0080771 | 10 | Tpra1         |
| -1.453851908 | 1 | 0.0081444 | 10 | Rufy3         |
| -0.531701377 | 1 | 0.0081736 | 10 | Oasl1         |
| -1.454740876 | 1 | 0.0082154 | 10 | BC028528      |
| -1.487052958 | 1 | 0.0082166 | 10 | Zc3h4         |
| -1.429805046 | 1 | 0.0082254 | 10 | Cdr2          |
| -1.395224669 | 1 | 0.0082337 | 10 | Tmem160       |
| -1.625255378 | 1 | 0.0082467 | 10 | Ctsk          |
| -1.489574312 | 1 | 0.0082508 | 10 | Csnk1e        |
| 0.313926     | 1 | 0.0082731 | 10 | Aprt          |
| -1.416650407 | 1 | 0.0082903 | 10 | Usp19         |
| -1.322012217 | 1 | 0.0083465 | 10 | Ttc33         |
| -1.525354795 | 1 | 0.0083649 | 10 | Hip1          |
| -1.347323617 | 1 | 0.0083664 | 10 | Gtf2a1        |
| -1.428269537 | 1 | 0.0083795 | 10 | Plekhm3       |
| -0.458762803 | 1 | 0.0084373 | 10 | Rpl39         |
| -1.951818875 | 1 | 0.0084718 | 10 | Ifitm1        |
| -0.342350075 | 1 | 0.0086472 | 10 | Sun2          |
| -1.518923905 | 1 | 0.0086579 | 10 | St3gal6       |
| -1.411690291 | 1 | 0.0086586 | 10 | Pde1b         |
| 0.321511853  | 1 | 0.0087075 | 10 | Prcc2c        |
| 0.636773303  | 1 | 0.0087078 | 10 | Arf4          |
| -0.279886533 | 1 | 0.0088359 | 10 | Fam133b       |
| -1.466632883 | 1 | 0.0089726 | 10 | Ate1          |
| -1.38533236  | 1 | 0.0089752 | 10 | Pitrm1        |
| -0.301993955 | 1 | 0.0090546 | 10 | Chd9          |
| -1.400851354 | 1 | 0.0091022 | 10 | Inpp5f        |
| -1.318159638 | 1 | 0.0091307 | 10 | Rab28         |
| -1.368345783 | 1 | 0.0091386 | 10 | Parl          |



|              |           |           |    |               |
|--------------|-----------|-----------|----|---------------|
| -0.821625262 | 1         | 0.0091853 | 10 | Map3k1        |
| -0.369827711 | 1         | 0.0092342 | 10 | Sowahc        |
| -1.896103844 | 1         | 0.009269  | 10 | Spn           |
| -1.461071752 | 1         | 0.0092815 | 10 | Nkap          |
| -1.460955752 | 1         | 0.0093198 | 10 | Ccr1          |
| -1.380395244 | 1         | 0.0093408 | 10 | Ppp2r5a       |
| -0.288207776 | 1         | 0.0094015 | 10 | Arhgap26      |
| -0.29341654  | 1         | 0.0094465 | 10 | Snx30         |
| -0.2561379   | 1         | 0.0094574 | 10 | Was           |
| -1.348322867 | 1         | 0.0094625 | 10 | Nabp2         |
| -1.407193941 | 1         | 0.0094747 | 10 | Ap2b1         |
| -1.287323644 | 1         | 0.0095556 | 10 | Cnih1         |
| -1.4534961   | 1         | 0.0095703 | 10 | Rabl6         |
| -1.324060874 | 1         | 0.0096074 | 10 | Dguok         |
| -1.373958977 | 1         | 0.0096111 | 10 | Zcchc9        |
| -1.362208536 | 1         | 0.0096167 | 10 | Fam53b        |
| -1.50897989  | 1         | 0.0096236 | 10 | Tagap         |
| -1.186300253 | 1         | 0.0096869 | 10 | Wbp4          |
| -0.279222323 | 1         | 0.0096933 | 10 | Zcchc7        |
| -1.514533328 | 1         | 0.0097008 | 10 | Zdhhc9        |
| 0.27355731   | 1         | 0.0097325 | 10 | Stx7          |
| -0.255487152 | 1         | 0.0097453 | 10 | Phax          |
| -1.545924507 | 1         | 0.0097869 | 10 | Mtmr12        |
| -1.472403889 | 1         | 0.0098148 | 10 | Ufsp2         |
| -1.459819866 | 1         | 0.0099029 | 10 | Eepd1         |
| -1.536165711 | 1         | 0.0099186 | 10 | Pnpla8        |
| 2.270730856  | 4.10E-163 | 3.07E-167 | 11 | Defb47        |
| 1.403993938  | 4.55E-145 | 3.41E-149 | 11 | Myom2         |
| 2.490354925  | 1.79E-144 | 1.34E-148 | 11 | Pla1a         |
| 1.674488415  | 7.92E-130 | 5.93E-134 | 11 | Gpr113        |
| 1.536659905  | 1.47E-113 | 1.10E-117 | 11 | Btnl9         |
| 1.723072865  | 1.35E-107 | 1.01E-111 | 11 | Amer2         |
| 2.69399807   | 3.79E-100 | 2.84E-104 | 11 | Slc4a11       |
| 2.201891692  | 3.76E-83  | 2.82E-87  | 11 | Ccdc173       |
| 1.579346826  | 2.70E-77  | 2.02E-81  | 11 | Fsip1         |
| 1.372153332  | 1.02E-74  | 7.61E-79  | 11 | Acsbg1        |
| 1.284466149  | 1.71E-62  | 1.28E-66  | 11 | Edaradd       |
| 2.081004081  | 9.10E-61  | 6.81E-65  | 11 | Hspa1l        |
| 2.06652943   | 1.74E-60  | 1.30E-64  | 11 | Zkscan8       |
| 2.951377206  | 1.10E-59  | 8.21E-64  | 11 | Tm7sf2        |
| 1.994731662  | 2.57E-55  | 1.92E-59  | 11 | Kcnab3        |
| 1.563194201  | 2.60E-54  | 1.94E-58  | 11 | Shcbp1l       |
| 1.467284934  | 5.21E-52  | 3.90E-56  | 11 | Kcnh4         |
| 1.906983214  | 1.03E-51  | 7.68E-56  | 11 | Scel          |
| 2.209097009  | 4.11E-51  | 3.08E-55  | 11 | Asb1          |
| 1.302797926  | 1.53E-50  | 1.15E-54  | 11 | Xkrx          |
| 0.494563045  | 1.76E-49  | 1.32E-53  | 11 | Vmn1r24       |
| 0.750249306  | 3.93E-48  | 2.94E-52  | 11 | Lrrc23        |
| 1.314779108  | 1.97E-47  | 1.47E-51  | 11 | Snora23       |
| 1.58833774   | 2.41E-47  | 1.81E-51  | 11 | Tmem220       |
| 1.271539681  | 7.61E-47  | 5.70E-51  | 11 | Nefh          |
| 1.784043157  | 1.59E-46  | 1.19E-50  | 11 | Myo6          |
| 1.034815669  | 1.23E-45  | 9.21E-50  | 11 | Pde1c         |
| 3.365899645  | 3.68E-45  | 2.75E-49  | 11 | Htr7          |
| 1.627421621  | 7.32E-45  | 5.49E-49  | 11 | Serpinb1c     |
| 2.242992996  | 9.51E-44  | 7.12E-48  | 11 | Nudt5         |
| 0.947827677  | 1.47E-43  | 1.10E-47  | 11 | 4930529C04Rik |
| 2.600141102  | 3.72E-43  | 2.78E-47  | 11 | F9            |
| 1.983461495  | 2.68E-42  | 2.01E-46  | 11 | Shroom3       |
| 0.968388964  | 5.45E-41  | 4.08E-45  | 11 | 4932416H05Rik |
| 1.269430021  | 1.04E-40  | 7.76E-45  | 11 | Lmbr1         |

|             |          |          |    |               |
|-------------|----------|----------|----|---------------|
| 1.079716975 | 8.29E-40 | 6.21E-44 | 11 | Ceacam16      |
| 1.278124759 | 1.59E-38 | 1.19E-42 | 11 | 1700012D14Rik |
| 1.698906202 | 7.12E-38 | 5.34E-42 | 11 | Clcn5         |
| 2.178419768 | 1.97E-36 | 1.47E-40 | 11 | Zbtb25        |
| 2.500868607 | 2.77E-36 | 2.08E-40 | 11 | Zfp618        |
| 2.480768493 | 2.69E-35 | 2.02E-39 | 11 | Gpr56         |
| 1.086753064 | 4.57E-34 | 3.42E-38 | 11 | Zfp773        |
| 1.958320707 | 5.95E-34 | 4.46E-38 | 11 | Acn9          |
| 1.286467017 | 6.85E-34 | 5.13E-38 | 11 | Adam11        |
| 0.683679058 | 7.43E-34 | 5.57E-38 | 11 | Plscr5        |
| 2.237913673 | 2.28E-33 | 1.71E-37 | 11 | Rrp1b         |
| 1.79532273  | 2.41E-31 | 1.81E-35 | 11 | Frat1         |
| 2.826890878 | 3.03E-31 | 2.27E-35 | 11 | Nupl1         |
| 1.33581551  | 3.89E-31 | 2.91E-35 | 11 | Gm2447        |
| 1.420030937 | 5.48E-31 | 4.10E-35 | 11 | Zfp933        |
| 2.058331844 | 1.02E-30 | 7.62E-35 | 11 | Zbed5         |
| 2.047786461 | 1.87E-30 | 1.40E-34 | 11 | Cnnm3         |
| 1.7836584   | 7.38E-30 | 5.53E-34 | 11 | Prkcq         |
| 2.16945684  | 9.12E-30 | 6.83E-34 | 11 | Oaf           |
| 1.087899239 | 1.35E-29 | 1.01E-33 | 11 | Mei1          |
| 1.885635272 | 1.57E-29 | 1.18E-33 | 11 | Mief2         |
| 1.069254804 | 1.81E-29 | 1.36E-33 | 11 | Mall          |
| 1.646461762 | 1.14E-28 | 8.53E-33 | 11 | Tnfsf8        |
| 2.803682414 | 1.13E-27 | 8.49E-32 | 11 | Pgf           |
| 1.959824196 | 1.55E-27 | 1.16E-31 | 11 | Clec16a       |
| 1.250709434 | 4.63E-27 | 3.46E-31 | 11 | Aldh1b1       |
| 1.624683501 | 1.11E-26 | 8.30E-31 | 11 | Tnk2          |
| 1.094528903 | 1.26E-25 | 9.47E-30 | 11 | Ift81         |
| 1.254678678 | 1.54E-25 | 1.15E-29 | 11 | Dak           |
| 1.20580566  | 1.43E-24 | 1.07E-28 | 11 | Rasd1         |
| 1.976653813 | 1.43E-24 | 1.07E-28 | 11 | Ifi205        |
| 1.271539681 | 1.62E-24 | 1.22E-28 | 11 | Dnah8         |
| 1.457948932 | 1.77E-24 | 1.33E-28 | 11 | Tjp3          |
| 1.324038647 | 5.92E-24 | 4.43E-28 | 11 | Impdh2        |
| 1.678276451 | 6.69E-24 | 5.01E-28 | 11 | Phf11c        |
| 1.018562889 | 4.92E-23 | 3.68E-27 | 11 | Klhdc9        |
| 1.418185067 | 8.09E-23 | 6.06E-27 | 11 | D17H6S53E     |
| 1.677511074 | 2.70E-22 | 2.02E-26 | 11 | Fktn          |
| 2.1499836   | 3.16E-22 | 2.37E-26 | 11 | Vdr           |
| 1.499521533 | 4.75E-22 | 3.56E-26 | 11 | Suox          |
| 2.264702656 | 6.81E-22 | 5.10E-26 | 11 | Cst7          |
| 1.560262847 | 9.27E-22 | 6.95E-26 | 11 | Prepl         |
| 1.183635009 | 3.54E-21 | 2.65E-25 | 11 | Cdhr3         |
| 1.646810255 | 4.33E-21 | 3.24E-25 | 11 | Cxx1b         |
| 1.051874811 | 1.26E-20 | 9.43E-25 | 11 | Snord16a      |
| 0.87872763  | 1.48E-20 | 1.11E-24 | 11 | Irg1          |
| 1.840595121 | 2.12E-20 | 1.59E-24 | 11 | St3gal3       |
| 0.948466239 | 3.47E-20 | 2.60E-24 | 11 | Ccr9          |
| 1.424871523 | 4.12E-20 | 3.09E-24 | 11 | Rgag4         |
| 1.553712307 | 7.00E-20 | 5.24E-24 | 11 | Stmn4         |
| 1.817579294 | 1.68E-19 | 1.26E-23 | 11 | Hdac10        |
| 2.187171146 | 2.54E-19 | 1.90E-23 | 11 | Ccdc102a      |
| 1.777797764 | 2.59E-19 | 1.94E-23 | 11 | Lcor          |
| 2.389221565 | 3.46E-19 | 2.59E-23 | 11 | Mpp7          |
| 0.922690754 | 5.00E-19 | 3.74E-23 | 11 | Mir324        |
| 1.722063128 | 6.08E-19 | 4.55E-23 | 11 | Samd4         |
| 2.34164133  | 8.17E-19 | 6.12E-23 | 11 | Ifitm6        |
| 1.569694313 | 1.07E-18 | 7.99E-23 | 11 | Ppp1r1a       |
| 1.035570102 | 1.19E-18 | 8.89E-23 | 11 | Slc25a32      |
| 1.611353622 | 3.32E-18 | 2.49E-22 | 11 | Gm3414        |
| 1.454778353 | 3.56E-18 | 2.66E-22 | 11 | Cep57l1       |

|             |          |          |    |          |
|-------------|----------|----------|----|----------|
| 1.726455691 | 9.00E-18 | 6.74E-22 | 11 | Alpk2    |
| 1.163027595 | 1.18E-17 | 8.84E-22 | 11 | Cby1     |
| 1.141325676 | 1.18E-17 | 8.85E-22 | 11 | Fam71f2  |
| 1.22010621  | 1.69E-17 | 1.27E-21 | 11 | Gprc5a   |
| 1.553044012 | 1.79E-17 | 1.34E-21 | 11 | Zfp628   |
| 1.330712754 | 5.97E-17 | 4.47E-21 | 11 | Zfp958   |
| 2.08129453  | 1.02E-16 | 7.61E-21 | 11 | Utp23    |
| 0.810712754 | 1.38E-16 | 1.03E-20 | 11 | Cacna1b  |
| 0.827739526 | 1.41E-16 | 1.06E-20 | 11 | Lsmp     |
| 1.62283356  | 1.99E-16 | 1.49E-20 | 11 | Abcb8    |
| 1.982626823 | 2.61E-16 | 1.96E-20 | 11 | Irf4     |
| 2.408693047 | 2.87E-16 | 2.15E-20 | 11 | Mllt1    |
| 2.13881221  | 5.96E-16 | 4.47E-20 | 11 | Zfp809   |
| 1.705612566 | 5.97E-16 | 4.47E-20 | 11 | Ap5z1    |
| 1.830169461 | 6.12E-16 | 4.58E-20 | 11 | Supv3l1  |
| 2.54208396  | 7.54E-16 | 5.65E-20 | 11 | Mcemp1   |
| 1.523474479 | 9.76E-16 | 7.31E-20 | 11 | Abca2    |
| 1.941621836 | 1.05E-15 | 7.88E-20 | 11 | Alkbh7   |
| 1.370302199 | 1.13E-15 | 8.44E-20 | 11 | Lipt2    |
| 1.307733431 | 1.18E-15 | 8.84E-20 | 11 | Cdk5rap2 |
| 1.428106782 | 1.87E-15 | 1.40E-19 | 11 | Gprasp1  |
| 1.73860311  | 2.63E-15 | 1.97E-19 | 11 | Itprp    |
| 1.787574599 | 5.02E-15 | 3.76E-19 | 11 | Ankrd13b |
| 1.189720782 | 1.61E-14 | 1.20E-18 | 11 | Tbl2     |
| 1.493322046 | 1.76E-14 | 1.32E-18 | 11 | Tgif2    |
| 1.756780348 | 1.88E-14 | 1.41E-18 | 11 | Ankrd33b |
| 1.837154047 | 2.26E-14 | 1.69E-18 | 11 | Rrp9     |
| 1.277049851 | 2.64E-14 | 1.98E-18 | 11 | Usp30    |
| 1.790582393 | 2.77E-14 | 2.07E-18 | 11 | Timmdc1  |
| 2.829904748 | 3.37E-14 | 2.52E-18 | 11 | Ramp3    |
| 2.149433913 | 4.44E-14 | 3.32E-18 | 11 | Acot2    |
| 2.544298455 | 5.59E-14 | 4.19E-18 | 11 | Timp1    |
| 2.007117043 | 6.22E-14 | 4.66E-18 | 11 | Rhoj     |
| 1.195167262 | 7.19E-14 | 5.38E-18 | 11 | Gm16894  |
| 1.250148882 | 1.00E-13 | 7.50E-18 | 11 | Palm     |
| 1.81865899  | 1.82E-13 | 1.36E-17 | 11 | Smpdl3b  |
| 1.113154799 | 2.12E-13 | 1.59E-17 | 11 | Mtrr     |
| 0.949055372 | 2.29E-13 | 1.72E-17 | 11 | Cul9     |
| 1.448475217 | 2.41E-13 | 1.80E-17 | 11 | Ndufaf5  |
| 1.442179375 | 2.44E-13 | 1.83E-17 | 11 | Dexi     |
| 2.448488452 | 3.08E-13 | 2.30E-17 | 11 | Arap2    |
| 1.447279133 | 4.13E-13 | 3.09E-17 | 11 | Tmem18   |
| 1.534651262 | 6.55E-13 | 4.91E-17 | 11 | Pspc1    |
| 1.98844465  | 7.43E-13 | 5.56E-17 | 11 | Cyp4f16  |
| 2.014800129 | 7.44E-13 | 5.57E-17 | 11 | Csnk1g1  |
| 2.168288443 | 7.46E-13 | 5.59E-17 | 11 | Dcstamp  |
| 1.519072703 | 7.74E-13 | 5.79E-17 | 11 | Cdc42ep2 |
| 2.208294619 | 7.82E-13 | 5.86E-17 | 11 | AU040320 |
| 1.967942826 | 8.58E-13 | 6.42E-17 | 11 | Kdm5b    |
| 1.277626429 | 1.37E-12 | 1.02E-16 | 11 | Zfp282   |
| 1.497793631 | 1.49E-12 | 1.12E-16 | 11 | Cd209d   |
| 1.219063457 | 1.50E-12 | 1.13E-16 | 11 | Pik3r2   |
| 1.399985071 | 1.83E-12 | 1.37E-16 | 11 | Coq6     |
| 1.597493439 | 1.86E-12 | 1.39E-16 | 11 | Ag1      |
| 1.866388637 | 2.08E-12 | 1.56E-16 | 11 | Cstf1    |
| 1.31479198  | 2.68E-12 | 2.01E-16 | 11 | Ogfod3   |
| 1.596261223 | 3.19E-12 | 2.39E-16 | 11 | Smyd5    |
| 1.389619631 | 3.52E-12 | 2.64E-16 | 11 | Iffo1    |
| 2.057836156 | 3.74E-12 | 2.80E-16 | 11 | Cmtm4    |
| 1.217375407 | 4.68E-12 | 3.50E-16 | 11 | Cep85    |
| 1.711089442 | 4.89E-12 | 3.66E-16 | 11 | Siglech  |

|             |          |          |    |               |
|-------------|----------|----------|----|---------------|
| 2.059250539 | 5.23E-12 | 3.92E-16 | 11 | Clmp          |
| 1.909710994 | 5.68E-12 | 4.25E-16 | 11 | Ubxn8         |
| 1.430089049 | 5.88E-12 | 4.40E-16 | 11 | Zfp938        |
| 2.368100302 | 5.92E-12 | 4.44E-16 | 11 | H2-Oa         |
| 1.145942349 | 8.35E-12 | 6.26E-16 | 11 | Rps6ka2       |
| 1.737301026 | 8.69E-12 | 6.51E-16 | 11 | St18          |
| 1.631693306 | 9.56E-12 | 7.16E-16 | 11 | Abhd13        |
| 2.023955448 | 1.23E-11 | 9.24E-16 | 11 | Avpi1         |
| 1.465341962 | 1.32E-11 | 9.85E-16 | 11 | Aig1          |
| 1.160875271 | 1.47E-11 | 1.10E-15 | 11 | Bag5          |
| 1.498608708 | 1.71E-11 | 1.28E-15 | 11 | Ddx19b        |
| 1.065924576 | 1.74E-11 | 1.31E-15 | 11 | Gapt          |
| 2.333121817 | 1.85E-11 | 1.39E-15 | 11 | Pwwp2b        |
| 1.957108489 | 2.18E-11 | 1.63E-15 | 11 | Fem1a         |
| 0.943172654 | 2.92E-11 | 2.18E-15 | 11 | B3galnt2      |
| 1.789542647 | 3.79E-11 | 2.84E-15 | 11 | Ms4a4c        |
| 1.232892113 | 4.60E-11 | 3.44E-15 | 11 | Cfl2          |
| 1.140906521 | 5.61E-11 | 4.20E-15 | 11 | Ssh3          |
| 1.155414788 | 6.25E-11 | 4.68E-15 | 11 | Srr           |
| 0.66956206  | 8.03E-11 | 6.01E-15 | 11 | Ggact         |
| 1.593853718 | 9.47E-11 | 7.09E-15 | 11 | Armc6         |
| 1.446589815 | 9.91E-11 | 7.42E-15 | 11 | Urgcp         |
| 1.315344559 | 2.21E-10 | 1.65E-14 | 11 | Fam126b       |
| 1.767467775 | 2.78E-10 | 2.08E-14 | 11 | Pla2g4a       |
| 1.605834909 | 3.09E-10 | 2.31E-14 | 11 | 2610034B18Rik |
| 1.536519906 | 3.89E-10 | 2.91E-14 | 11 | 9030617O03Rik |
| 1.581497574 | 4.45E-10 | 3.33E-14 | 11 | Cdh1          |
| 1.501460287 | 4.50E-10 | 3.37E-14 | 11 | Kifap3        |
| 2.163403613 | 5.33E-10 | 3.99E-14 | 11 | Atl2          |
| 1.217993653 | 6.29E-10 | 4.71E-14 | 11 | Ints3         |
| 1.907453549 | 7.39E-10 | 5.53E-14 | 11 | Srf           |
| 1.218686413 | 7.97E-10 | 5.97E-14 | 11 | Pop1          |
| 1.463667638 | 7.99E-10 | 5.99E-14 | 11 | Ddx28         |
| 1.399168236 | 9.21E-10 | 6.90E-14 | 11 | 9430008C03Rik |
| 1.577907185 | 1.05E-09 | 7.88E-14 | 11 | Mtf1          |
| 1.774089578 | 1.09E-09 | 8.14E-14 | 11 | Ttc39b        |
| 1.34527767  | 1.43E-09 | 1.07E-13 | 11 | Il1rl1        |
| 1.114449964 | 1.50E-09 | 1.12E-13 | 11 | Polr3a        |
| 1.200751116 | 1.65E-09 | 1.23E-13 | 11 | Slx4          |
| 0.584442979 | 1.65E-09 | 1.23E-13 | 11 | Jazf1         |
| 2.207820096 | 1.72E-09 | 1.29E-13 | 11 | Cd209a        |
| 0.689040791 | 1.82E-09 | 1.36E-13 | 11 | L3mbtl1       |
| 1.583830547 | 1.96E-09 | 1.47E-13 | 11 | Arl13b        |
| 1.09173596  | 2.34E-09 | 1.75E-13 | 11 | Dhx29         |
| 1.961838331 | 2.44E-09 | 1.83E-13 | 11 | Dnajc4        |
| 0.734645501 | 2.46E-09 | 1.85E-13 | 11 | Ccdc15        |
| 1.340291328 | 2.52E-09 | 1.89E-13 | 11 | Lrrk2         |
| 1.747765477 | 2.53E-09 | 1.89E-13 | 11 | 1110012L19Rik |
| 2.194088326 | 2.77E-09 | 2.08E-13 | 11 | Itgb1bp1      |
| 1.348956866 | 2.78E-09 | 2.08E-13 | 11 | Cep70         |
| 1.222430244 | 2.90E-09 | 2.17E-13 | 11 | Hsf2          |
| 1.0531401   | 3.04E-09 | 2.28E-13 | 11 | Fam151b       |
| 0.855398423 | 3.19E-09 | 2.39E-13 | 11 | 1810014B01Rik |
| 0.923179393 | 3.20E-09 | 2.40E-13 | 11 | Armcx6        |
| 1.834213061 | 3.86E-09 | 2.89E-13 | 11 | Rnf185        |
| 1.611008826 | 4.32E-09 | 3.24E-13 | 11 | Prmt7         |
| 1.175304298 | 4.54E-09 | 3.40E-13 | 11 | Prkca         |
| 1.20713214  | 5.37E-09 | 4.02E-13 | 11 | Kti12         |
| 2.38540532  | 5.43E-09 | 4.06E-13 | 11 | Ifitm1        |
| 2.071627805 | 5.64E-09 | 4.22E-13 | 11 | Arl6ip5       |
| 0.754011065 | 6.12E-09 | 4.58E-13 | 11 | Ppp1r16b      |

|             |          |          |    |               |
|-------------|----------|----------|----|---------------|
| 0.948805395 | 6.14E-09 | 4.60E-13 | 11 | Zbtb5         |
| 0.871189408 | 6.38E-09 | 4.78E-13 | 11 | Dnajb2        |
| 1.779985662 | 6.42E-09 | 4.80E-13 | 11 | Mrps6         |
| 1.459963966 | 6.94E-09 | 5.19E-13 | 11 | Mad2l1bp      |
| 1.505110416 | 7.79E-09 | 5.84E-13 | 11 | Diap3         |
| 1.514245698 | 8.20E-09 | 6.14E-13 | 11 | Mroh1         |
| 1.837445266 | 8.22E-09 | 6.15E-13 | 11 | Nudt3         |
| 1.727181076 | 8.70E-09 | 6.52E-13 | 11 | Ripk3         |
| 1.140017204 | 1.06E-08 | 7.94E-13 | 11 | Rundc1        |
| 1.843075657 | 1.11E-08 | 8.31E-13 | 11 | Slc2a6        |
| 1.425408033 | 1.14E-08 | 8.53E-13 | 11 | Lonp1         |
| 1.36925099  | 1.19E-08 | 8.92E-13 | 11 | Fbxl15        |
| 1.280168588 | 1.19E-08 | 8.94E-13 | 11 | Fam102a       |
| 1.227370403 | 1.22E-08 | 9.17E-13 | 11 | Hmgn2         |
| 1.613363779 | 1.26E-08 | 9.44E-13 | 11 | Rtca          |
| 1.324196016 | 1.26E-08 | 9.46E-13 | 11 | Exosc10       |
| 1.151468123 | 1.32E-08 | 9.87E-13 | 11 | Kit           |
| 0.522677231 | 1.43E-08 | 1.07E-12 | 11 | Intu          |
| 1.76238038  | 1.49E-08 | 1.11E-12 | 11 | Rhoh          |
| 1.39133284  | 1.60E-08 | 1.20E-12 | 11 | Fance         |
| 1.543959983 | 1.65E-08 | 1.23E-12 | 11 | Insig2        |
| 0.952705012 | 1.65E-08 | 1.24E-12 | 11 | Nudcd1        |
| 0.743509739 | 2.50E-08 | 1.87E-12 | 11 | 2010320M18Rik |
| 0.974072128 | 2.62E-08 | 1.96E-12 | 11 | Galnt12       |
| 1.58138871  | 2.63E-08 | 1.97E-12 | 11 | Chid1         |
| 0.730658954 | 2.69E-08 | 2.01E-12 | 11 | Snn           |
| 1.081709481 | 2.91E-08 | 2.18E-12 | 11 | Aldh18a1      |
| 1.195138923 | 3.12E-08 | 2.33E-12 | 11 | BC033916      |
| 1.171028649 | 3.28E-08 | 2.45E-12 | 11 | Tbc1d8        |
| 1.231361039 | 3.33E-08 | 2.50E-12 | 11 | Nrp           |
| 1.343687332 | 3.76E-08 | 2.81E-12 | 11 | 4930453N24Rik |
| 1.122149671 | 3.95E-08 | 2.96E-12 | 11 | Slc35b4       |
| 1.417620811 | 4.43E-08 | 3.32E-12 | 11 | Eva1b         |
| 1.109380848 | 5.51E-08 | 4.13E-12 | 11 | 5730455P16Rik |
| 1.937212955 | 5.62E-08 | 4.21E-12 | 11 | Mtap          |
| 1.614568589 | 5.64E-08 | 4.22E-12 | 11 | Fxr2          |
| 1.713047545 | 6.21E-08 | 4.65E-12 | 11 | Tmem223       |
| 1.940352864 | 6.69E-08 | 5.01E-12 | 11 | Siae          |
| 1.446127982 | 6.75E-08 | 5.06E-12 | 11 | Il1rap        |
| 0.945419005 | 6.76E-08 | 5.06E-12 | 11 | Lrrc42        |
| 1.286293928 | 6.89E-08 | 5.16E-12 | 11 | Parp10        |
| 1.144080226 | 7.05E-08 | 5.28E-12 | 11 | Cdca3         |
| 1.322442987 | 7.07E-08 | 5.29E-12 | 11 | Cyb561d2      |
| 1.189659124 | 7.50E-08 | 5.62E-12 | 11 | Mybpc3        |
| 1.318233343 | 7.56E-08 | 5.66E-12 | 11 | Nat10         |
| 1.154846358 | 7.93E-08 | 5.94E-12 | 11 | Mrps10        |
| 1.299124944 | 8.13E-08 | 6.09E-12 | 11 | Trem1         |
| 1.984440256 | 8.24E-08 | 6.17E-12 | 11 | 4931406C07Rik |
| 2.247531474 | 8.42E-08 | 6.30E-12 | 11 | Tnip3         |
| 1.284721699 | 8.74E-08 | 6.55E-12 | 11 | Dcps          |
| 1.253352883 | 9.44E-08 | 7.07E-12 | 11 | Gas8          |
| 1.610818499 | 9.83E-08 | 7.36E-12 | 11 | Nhlrc3        |
| 1.036594467 | 9.98E-08 | 7.47E-12 | 11 | Mrps11        |
| 1.442039327 | 1.13E-07 | 8.44E-12 | 11 | Ccr7          |
| 2.071785823 | 1.19E-07 | 8.90E-12 | 11 | Olfml3        |
| 1.63786678  | 1.24E-07 | 9.25E-12 | 11 | Araf          |
| 1.172882217 | 1.32E-07 | 9.88E-12 | 11 | Alkbh2        |
| 1.407481638 | 1.44E-07 | 1.08E-11 | 11 | Ttc27         |
| 0.783946411 | 1.70E-07 | 1.27E-11 | 11 | Sell          |
| 1.469371972 | 1.76E-07 | 1.31E-11 | 11 | Tm9sf4        |
| 1.314727042 | 1.80E-07 | 1.35E-11 | 11 | Akr7a5        |

|             |          |          |    |               |
|-------------|----------|----------|----|---------------|
| 1.027850647 | 2.12E-07 | 1.59E-11 | 11 | Adcy9         |
| 1.336933348 | 2.21E-07 | 1.65E-11 | 11 | Smcr8         |
| 1.277227803 | 2.42E-07 | 1.81E-11 | 11 | Rgs12         |
| 1.269643776 | 2.61E-07 | 1.96E-11 | 11 | B9d2          |
| 1.404144212 | 3.02E-07 | 2.26E-11 | 11 | Procr         |
| 1.112078415 | 3.60E-07 | 2.69E-11 | 11 | Ciita         |
| 1.033545021 | 3.90E-07 | 2.92E-11 | 11 | Tcf7l2        |
| 0.592620361 | 4.28E-07 | 3.20E-11 | 11 | Zkscan14      |
| 1.726232295 | 4.45E-07 | 3.33E-11 | 11 | Hsd3b7        |
| 1.757399885 | 4.65E-07 | 3.48E-11 | 11 | Scnm1         |
| 1.013027367 | 4.71E-07 | 3.53E-11 | 11 | Btbd9         |
| 1.30697186  | 4.98E-07 | 3.73E-11 | 11 | Tcf20         |
| 0.893498948 | 5.43E-07 | 4.07E-11 | 11 | Cd1d1         |
| 1.291039948 | 5.84E-07 | 4.37E-11 | 11 | 1110032A03Rik |
| 0.959545196 | 5.85E-07 | 4.38E-11 | 11 | Myo1b         |
| 0.935726722 | 6.18E-07 | 4.63E-11 | 11 | Nup210        |
| 0.869806965 | 6.75E-07 | 5.05E-11 | 11 | Fastk         |
| 0.78635431  | 7.03E-07 | 5.26E-11 | 11 | Pdcd1         |
| 1.550627232 | 7.66E-07 | 5.74E-11 | 11 | B230219D22Rik |
| 0.913480162 | 8.78E-07 | 6.57E-11 | 11 | Cspg4         |
| 1.430125217 | 8.81E-07 | 6.60E-11 | 11 | Stat5a        |
| 1.351473016 | 1.19E-06 | 8.90E-11 | 11 | Nup62         |
| 1.423501155 | 1.22E-06 | 9.12E-11 | 11 | Drosha        |
| 1.093214205 | 1.23E-06 | 9.18E-11 | 11 | Trpm4         |
| 1.041527715 | 1.28E-06 | 9.62E-11 | 11 | Kif16b        |
| 1.125444349 | 1.30E-06 | 9.75E-11 | 11 | Prune2        |
| 0.812988732 | 1.46E-06 | 1.09E-10 | 11 | Mtmr7         |
| 1.051612784 | 1.55E-06 | 1.16E-10 | 11 | Slc25a20      |
| 1.357742921 | 1.60E-06 | 1.20E-10 | 11 | Heatr1        |
| 1.477439634 | 1.68E-06 | 1.26E-10 | 11 | Usp32         |
| 0.638333918 | 1.77E-06 | 1.32E-10 | 11 | Oplah         |
| 0.839999038 | 2.00E-06 | 1.50E-10 | 11 | Jak3          |
| 1.75799128  | 2.01E-06 | 1.50E-10 | 11 | 2310045N01Rik |
| 1.524197027 | 2.02E-06 | 1.51E-10 | 11 | Esco1         |
| 1.157650523 | 2.45E-06 | 1.84E-10 | 11 | Haus2         |
| 0.864457529 | 2.62E-06 | 1.96E-10 | 11 | Kpna6         |
| 1.06317755  | 2.72E-06 | 2.04E-10 | 11 | Wdr82         |
| 0.804757917 | 2.81E-06 | 2.11E-10 | 11 | Sh3bgrl2      |
| 1.112253128 | 2.89E-06 | 2.16E-10 | 11 | Atat1         |
| 1.638800789 | 2.94E-06 | 2.20E-10 | 11 | Mamdc2        |
| 0.83228479  | 3.24E-06 | 2.43E-10 | 11 | Tacc2         |
| 2.752361247 | 3.38E-06 | 2.53E-10 | 11 | Fem1b         |
| 1.302355757 | 3.58E-06 | 2.68E-10 | 11 | Arhgap12      |
| 1.001349706 | 3.93E-06 | 2.94E-10 | 11 | Rrnad1        |
| 1.858502419 | 4.09E-06 | 3.06E-10 | 11 | Hilpda        |
| 1.050325903 | 4.99E-06 | 3.74E-10 | 11 | Gbf1          |
| 1.360649508 | 5.01E-06 | 3.75E-10 | 11 | Atg14         |
| 1.148487208 | 5.14E-06 | 3.85E-10 | 11 | Eid3          |
| 1.274772309 | 5.19E-06 | 3.89E-10 | 11 | Gtl3          |
| 1.328067394 | 5.42E-06 | 4.06E-10 | 11 | Ipo13         |
| 1.544259007 | 5.82E-06 | 4.36E-10 | 11 | Rmnd5b        |
| 0.868697456 | 6.11E-06 | 4.58E-10 | 11 | Al846148      |
| 1.819487576 | 6.22E-06 | 4.66E-10 | 11 | Timm50        |
| 1.652170357 | 6.44E-06 | 4.82E-10 | 11 | Atad1         |
| 1.303678596 | 7.47E-06 | 5.59E-10 | 11 | Tmc6          |
| 1.559389412 | 7.65E-06 | 5.73E-10 | 11 | Gpr35         |
| 0.700035842 | 7.67E-06 | 5.74E-10 | 11 | Gba2          |
| 1.980269939 | 7.86E-06 | 5.89E-10 | 11 | Il1r2         |
| 1.662369238 | 7.87E-06 | 5.90E-10 | 11 | Reep3         |
| 1.52209348  | 7.89E-06 | 5.91E-10 | 11 | Mthfr         |
| 0.959308117 | 7.91E-06 | 5.93E-10 | 11 | Ly9           |

|             |             |          |    |               |
|-------------|-------------|----------|----|---------------|
| 1.500759722 | 7.94E-06    | 5.95E-10 | 11 | Nprl2         |
| 1.027830981 | 9.07E-06    | 6.79E-10 | 11 | Urod          |
| 0.706311602 | 9.51E-06    | 7.12E-10 | 11 | Atr           |
| 1.152829166 | 1.00E-05    | 7.51E-10 | 11 | Ogfod2        |
| 1.420757034 | 1.07E-05    | 8.00E-10 | 11 | Tmem175       |
| 0.988786234 | 1.29E-05    | 9.65E-10 | 11 | Snord65       |
| 1.032932075 | 1.31E-05    | 9.78E-10 | 11 | Ccdc43        |
| 1.399220659 | 1.31E-05    | 9.78E-10 | 11 | Tmem38b       |
| 1.138583677 | 1.33E-05    | 9.96E-10 | 11 | Acadsb        |
| 1.290052533 | 1.33E-05    | 9.99E-10 | 11 | Slc30a9       |
| 1.400635946 | 1.39E-05    | 1.04E-09 | 11 | Pmpca         |
| 1.240508968 | 1.42E-05    | 1.06E-09 | 11 | C1galt1       |
| 0.422170861 | 1.44E-05    | 1.08E-09 | 11 | Slc4a8        |
| 1.476625098 | 1.95E-05    | 1.46E-09 | 11 | Mark3         |
| 1.573293754 | 2.00E-05    | 1.50E-09 | 11 | Mapk1ip1l     |
| 1.134354679 | 2.03E-05    | 1.52E-09 | 11 | Gclc          |
| 1.210631753 | 2.06E-05    | 1.54E-09 | 11 | Gtf3a         |
| 1.735440591 | 2.13E-05    | 1.59E-09 | 11 | Wdr33         |
| 1.154658686 | 2.54E-05    | 1.90E-09 | 11 | Hmgcr         |
| 1.456535665 | 2.67E-05    | 2.00E-09 | 11 | Hsd17b10      |
| 0.704075476 | 2.68E-05    | 2.01E-09 | 11 | Cox10         |
| 0.755113674 | 2.71E-05    | 2.03E-09 | 11 | Slc39a14      |
| 1.522302995 | 2.79E-05    | 2.09E-09 | 11 | Aco2          |
| 0.554842509 | 2.89E-05    | 2.17E-09 | 11 | Zfp748        |
| 1.334715659 | 2.93E-05    | 2.19E-09 | 11 | Asxl1         |
| 1.454482213 | 3.04E-05    | 2.27E-09 | 11 | Def6          |
| 1.493805953 | 3.13E-05    | 2.35E-09 | 11 | Mllt6         |
| 1.26912654  | 3.22E-05    | 2.41E-09 | 11 | Igf2bp2       |
| 1.253391458 | 3.34E-05    | 2.50E-09 | 11 | Srprb         |
| 0.983064604 | 3.43E-05    | 2.57E-09 | 11 | Polr3d        |
| 1.23495671  | 3.46E-05    | 2.59E-09 | 11 | Spdl1         |
| 1.044580571 | 4.18E-05    | 3.13E-09 | 11 | Lphn2         |
| 1.190707159 | 4.19E-05    | 3.14E-09 | 11 | Mnat1         |
| 0.901181444 | 4.37E-05    | 3.28E-09 | 11 | Zfp787        |
| 0.785838447 | 4.53E-05    | 3.39E-09 | 11 | Slc30a4       |
| 1.406126505 | 4.61E-05    | 3.45E-09 | 11 | Apoa1bp       |
| 1.390651729 | 5.19E-05    | 3.89E-09 | 11 | Atxn2l        |
| 1.20887582  | 5.36E-05    | 4.02E-09 | 11 | Zfyve19       |
| 1.28243018  | 5.41E-05    | 4.05E-09 | 11 | Wwp2          |
| 0.813878984 | 5.46E-05    | 4.09E-09 | 11 | 6330416G13Rik |
| 0.64262788  | 5.48E-05    | 4.10E-09 | 11 | Zfp952        |
| 1.400339579 | 5.93E-05    | 4.44E-09 | 11 | Samsn1        |
| 0.863015931 | 6.38E-05    | 4.78E-09 | 11 | Htra4         |
| 1.368959616 | 6.41E-05    | 4.80E-09 | 11 | Gdap2         |
| 1.504196064 | 6.68E-05    | 5.00E-09 | 11 | Dennd5a       |
| 1.497282816 | 6.75E-05    | 5.06E-09 | 11 | Cul1          |
| 1.378128152 | 6.96E-05    | 5.21E-09 | 11 | Lcmt2         |
| 1.017086064 | 7.12E-05    | 5.33E-09 | 11 | Tbc1d14       |
| 1.357162639 | 7.53E-05    | 5.64E-09 | 11 | Phtf1         |
| 1.392263163 | 7.62E-05    | 5.71E-09 | 11 | Il1rn         |
| 1.01090456  | 7.76E-05    | 5.81E-09 | 11 | Pstpip2       |
| 0.953318674 | 7.94E-05    | 5.95E-09 | 11 | Wrn           |
| 0.764112161 | 7.99E-05    | 5.99E-09 | 11 | Elk1          |
| 1.437329364 | 8.44E-05    | 6.32E-09 | 11 | Ndrgr1        |
| 0.930524101 | 8.50E-05    | 6.37E-09 | 11 | Itpr1         |
| 2.03909356  | 8.81E-05    | 6.60E-09 | 11 | Gfpt1         |
| 0.840534227 | 8.92E-05    | 6.68E-09 | 11 | Zfp580        |
| 0.888121781 | 0.000108312 | 8.11E-09 | 11 | Gnpda2        |
| 0.844303942 | 0.000108487 | 8.13E-09 | 11 | Pias3         |
| 1.259571654 | 0.000110422 | 8.27E-09 | 11 | Qdpr          |
| 1.167560652 | 0.000113415 | 8.49E-09 | 11 | Fbxl3         |

|             |             |          |    |               |
|-------------|-------------|----------|----|---------------|
| 1.284989551 | 0.00011763  | 8.81E-09 | 11 | 2310009A05Rik |
| 1.429584238 | 0.000118312 | 8.86E-09 | 11 | Cops5         |
| 1.312530544 | 0.000121907 | 9.13E-09 | 11 | Kcnn4         |
| 1.53901857  | 0.000122384 | 9.17E-09 | 11 | Cc2d1b        |
| 0.75505285  | 0.00012339  | 9.24E-09 | 11 | Gm2027        |
| 1.427663071 | 0.000123847 | 9.28E-09 | 11 | Babam1        |
| 1.188728226 | 0.000123991 | 9.29E-09 | 11 | Tnfsf13b      |
| 1.285141955 | 0.00013323  | 9.98E-09 | 11 | Gramd1a       |
| 1.04940116  | 0.000133465 | 1.00E-08 | 11 | Exosc1        |
| 0.804298201 | 0.000142506 | 1.07E-08 | 11 | Zbtb37        |
| 1.475641659 | 0.000146267 | 1.10E-08 | 11 | Vps37a        |
| 1.085209683 | 0.000148028 | 1.11E-08 | 11 | Tnni2         |
| 1.15411423  | 0.000151219 | 1.13E-08 | 11 | Phldb1        |
| 1.457113277 | 0.00016054  | 1.20E-08 | 11 | Atp6v0a2      |
| 1.126104975 | 0.000161918 | 1.21E-08 | 11 | Msl1          |
| 1.152707184 | 0.000164372 | 1.23E-08 | 11 | Ttyh2         |
| 1.090934142 | 0.000164533 | 1.23E-08 | 11 | Atp10a        |
| 0.853248545 | 0.000172976 | 1.30E-08 | 11 | Cep44         |
| 0.824611902 | 0.000178847 | 1.34E-08 | 11 | Usp37         |
| 0.931400621 | 0.000194664 | 1.46E-08 | 11 | Lrrc8a        |
| 0.846314259 | 0.000194776 | 1.46E-08 | 11 | Fkbp1         |
| 0.764192738 | 0.000198842 | 1.49E-08 | 11 | Prtg          |
| 1.29253886  | 0.000203406 | 1.52E-08 | 11 | Fau           |
| 1.241179598 | 0.000204489 | 1.53E-08 | 11 | Ppp1r13l      |
| 0.781133664 | 0.000213632 | 1.60E-08 | 11 | Wdfy1         |
| 1.391459605 | 0.00021516  | 1.61E-08 | 11 | Trim41        |
| 1.095521096 | 0.000219396 | 1.64E-08 | 11 | Vps45         |
| 0.524580423 | 0.000219596 | 1.64E-08 | 11 | Fyco1         |
| 0.863912545 | 0.000229645 | 1.72E-08 | 11 | Clstn1        |
| 1.178120574 | 0.000237361 | 1.78E-08 | 11 | Pex13         |
| 1.306488927 | 0.00023784  | 1.78E-08 | 11 | Napsa         |
| 1.183073723 | 0.000238331 | 1.78E-08 | 11 | Thoc5         |
| 1.013516621 | 0.000238855 | 1.79E-08 | 11 | Blcap         |
| 1.402821605 | 0.000240356 | 1.80E-08 | 11 | Clcn7         |
| 1.147065033 | 0.000246872 | 1.85E-08 | 11 | Pitrm1        |
| 1.326476303 | 0.000254719 | 1.91E-08 | 11 | Smarcal1      |
| 1.248618818 | 0.000269716 | 2.02E-08 | 11 | Tbc1d19       |
| 0.855816411 | 0.000283564 | 2.12E-08 | 11 | Trappc13      |
| 1.132144793 | 0.000307732 | 2.30E-08 | 11 | Fmn1          |
| 1.133059723 | 0.000308441 | 2.31E-08 | 11 | Mrps27        |
| 1.361856354 | 0.000321669 | 2.41E-08 | 11 | Ifih1         |
| 1.074669094 | 0.000325853 | 2.44E-08 | 11 | Ado           |
| 0.923068504 | 0.000331397 | 2.48E-08 | 11 | Nol12         |
| 1.264697112 | 0.000333894 | 2.50E-08 | 11 | Rtfdc1        |
| 1.091453797 | 0.000338271 | 2.53E-08 | 11 | Cul2          |
| 0.723364976 | 0.000367466 | 2.75E-08 | 11 | Pde12         |
| 1.021704412 | 0.000381067 | 2.85E-08 | 11 | Abcf2         |
| 1.462008333 | 0.000383747 | 2.87E-08 | 11 | Ptpn22        |
| 1.077561947 | 0.000396618 | 2.97E-08 | 11 | Nrm           |
| 0.571388905 | 0.000416195 | 3.12E-08 | 11 | Caap1         |
| 0.857293135 | 0.000432348 | 3.24E-08 | 11 | Tmem62        |
| 1.396899775 | 0.000439396 | 3.29E-08 | 11 | Tnpo3         |
| 1.250066901 | 0.000444532 | 3.33E-08 | 11 | 2310061I04Rik |
| 1.114648084 | 0.00045247  | 3.39E-08 | 11 | Bloc1s4       |
| 1.118726298 | 0.000456943 | 3.42E-08 | 11 | Mrps34        |
| 0.604733279 | 0.000457395 | 3.43E-08 | 11 | Gmeb2         |
| 1.121834617 | 0.000461189 | 3.45E-08 | 11 | Hivep1        |
| 0.954077068 | 0.000469813 | 3.52E-08 | 11 | Eif2b4        |
| 1.312501598 | 0.000477803 | 3.58E-08 | 11 | Dhrs7b        |
| 0.728107165 | 0.000478442 | 3.58E-08 | 11 | Pigh          |
| 0.913763563 | 0.000509505 | 3.82E-08 | 11 | Xpot          |



|             |             |          |    |               |
|-------------|-------------|----------|----|---------------|
| 1.235096397 | 0.000512027 | 3.83E-08 | 11 | Emilin2       |
| 1.057581262 | 0.000559881 | 4.19E-08 | 11 | Rtn1          |
| 1.215657957 | 0.000561479 | 4.21E-08 | 11 | Acot7         |
| 0.652060167 | 0.000575525 | 4.31E-08 | 11 | Sh2d3c        |
| 0.71507647  | 0.000627856 | 4.70E-08 | 11 | Cyb561a3      |
| 1.071933798 | 0.000645636 | 4.84E-08 | 11 | Lyar          |
| 0.839040724 | 0.000661073 | 4.95E-08 | 11 | Brd3          |
| 0.749358722 | 0.000665414 | 4.98E-08 | 11 | Mki67         |
| 1.223201434 | 0.000690092 | 5.17E-08 | 11 | Decr1         |
| 1.092639729 | 0.000696334 | 5.22E-08 | 11 | Pdlim1        |
| 1.21722051  | 0.000708523 | 5.31E-08 | 11 | Dync1li1      |
| 1.14131186  | 0.000718415 | 5.38E-08 | 11 | Tuba4a        |
| 1.383153109 | 0.000740475 | 5.55E-08 | 11 | Pdf           |
| 1.253784223 | 0.00074297  | 5.56E-08 | 11 | Bmyc          |
| 0.836203859 | 0.000743719 | 5.57E-08 | 11 | Vps33b        |
| 0.674117041 | 0.000757066 | 5.67E-08 | 11 | C2cd5         |
| 1.161599056 | 0.000758269 | 5.68E-08 | 11 | Cd97          |
| 0.593929898 | 0.000782954 | 5.86E-08 | 11 | Il18rap       |
| 0.939827713 | 0.000786407 | 5.89E-08 | 11 | Rfwd2         |
| 0.630721783 | 0.000795325 | 5.96E-08 | 11 | Ccdc66        |
| 0.992780417 | 0.000886208 | 6.64E-08 | 11 | A530054K11Rik |
| 1.197193117 | 0.000909484 | 6.81E-08 | 11 | Snhg1         |
| 0.70322041  | 0.000937122 | 7.02E-08 | 11 | Sfxn5         |
| 0.546082194 | 0.000977876 | 7.32E-08 | 11 | 1810030007Rik |
| 0.741947418 | 0.000978012 | 7.32E-08 | 11 | Cxcl14        |
| 1.004066018 | 0.001013625 | 7.59E-08 | 11 | Rnmt          |
| 1.285627459 | 0.001055149 | 7.90E-08 | 11 | Leng1         |
| 1.299851521 | 0.001090789 | 8.17E-08 | 11 | Fam134a       |
| 1.181475008 | 0.00115573  | 8.66E-08 | 11 | Wdfy3         |
| 1.291352302 | 0.001249629 | 9.36E-08 | 11 | Scmh1         |
| 0.901173582 | 0.001255011 | 9.40E-08 | 11 | 3110040N11Rik |
| 0.757877108 | 0.001269188 | 9.51E-08 | 11 | Zranb3        |
| 0.852874993 | 0.001281185 | 9.60E-08 | 11 | Crot          |
| 1.590096218 | 0.001313346 | 9.84E-08 | 11 | Cers6         |
| 1.036991278 | 0.001338425 | 1.00E-07 | 11 | Coq10a        |
| 0.992929562 | 0.001395584 | 1.05E-07 | 11 | Rnpepl1       |
| 1.105545684 | 0.001397868 | 1.05E-07 | 11 | Derl1         |
| 1.198746114 | 0.001404124 | 1.05E-07 | 11 | Tulp4         |
| 1.14330999  | 0.001426354 | 1.07E-07 | 11 | Clec4e        |
| 1.356238673 | 0.001448135 | 1.08E-07 | 11 | Sos2          |
| 1.214558289 | 0.001480411 | 1.11E-07 | 11 | Nufip1        |
| 0.787360346 | 0.001491408 | 1.12E-07 | 11 | Swt1          |
| 1.293460645 | 0.001521906 | 1.14E-07 | 11 | Slc16a6       |
| 0.599563378 | 0.001532766 | 1.15E-07 | 11 | Ubr7          |
| 0.888015317 | 0.001545599 | 1.16E-07 | 11 | Comt          |
| 1.106355174 | 0.001595059 | 1.19E-07 | 11 | Hook3         |
| 1.291691908 | 0.00162853  | 1.22E-07 | 11 | Il1b          |
| 0.873934742 | 0.001634013 | 1.22E-07 | 11 | Gpd2          |
| 1.16328622  | 0.001793785 | 1.34E-07 | 11 | Tgm2          |
| 1.226858218 | 0.001825785 | 1.37E-07 | 11 | Agpat5        |
| 0.751404516 | 0.001880304 | 1.41E-07 | 11 | Dus3l         |
| 1.131783941 | 0.001895928 | 1.42E-07 | 11 | Brpf1         |
| 0.930552698 | 0.00192333  | 1.44E-07 | 11 | Mettl5        |
| 1.162538669 | 0.001951547 | 1.46E-07 | 11 | Gch1          |
| 1.120209886 | 0.00201481  | 1.51E-07 | 11 | Ndufa11       |
| 0.972618182 | 0.002049505 | 1.53E-07 | 11 | Tap1          |
| 1.023227196 | 0.002110753 | 1.58E-07 | 11 | Atp13a1       |
| 0.931806823 | 0.002119021 | 1.59E-07 | 11 | Tlr2          |
| 0.738498289 | 0.002120511 | 1.59E-07 | 11 | Coasy         |
| 1.089144166 | 0.002127508 | 1.59E-07 | 11 | Utp15         |
| 1.088861812 | 0.002178495 | 1.63E-07 | 11 | Nop58         |

|             |             |          |    |               |
|-------------|-------------|----------|----|---------------|
| 0.750249306 | 0.002195633 | 1.64E-07 | 11 | Wdr7          |
| 1.132431349 | 0.002198811 | 1.65E-07 | 11 | Fam198b       |
| 0.942076756 | 0.002231206 | 1.67E-07 | 11 | Ercc3         |
| 0.941018118 | 0.002242796 | 1.68E-07 | 11 | Mcph1         |
| 1.108756929 | 0.002271741 | 1.70E-07 | 11 | Tnip1         |
| 0.741679098 | 0.002297211 | 1.72E-07 | 11 | Flrt3         |
| 1.307307296 | 0.002416941 | 1.81E-07 | 11 | Angel2        |
| 0.846611352 | 0.002427373 | 1.82E-07 | 11 | Setd5         |
| 1.175282947 | 0.002441869 | 1.83E-07 | 11 | Ifi35         |
| 0.880097092 | 0.002478868 | 1.86E-07 | 11 | Trmt1         |
| 0.933708022 | 0.002520498 | 1.89E-07 | 11 | Cpsf7         |
| 0.994479938 | 0.002543954 | 1.91E-07 | 11 | Nudt14        |
| 1.961964285 | 0.002650472 | 1.99E-07 | 11 | Gapvd1        |
| 1.046198932 | 0.00266502  | 2.00E-07 | 11 | Col14a1       |
| 0.804907718 | 0.002682313 | 2.01E-07 | 11 | Ccdc58        |
| 1.170886209 | 0.002730635 | 2.05E-07 | 11 | Cask          |
| 1.022540875 | 0.002737801 | 2.05E-07 | 11 | Ncoa1         |
| 1.028763823 | 0.002777015 | 2.08E-07 | 11 | Plrg1         |
| 1.019687749 | 0.002832235 | 2.12E-07 | 11 | Cox7a1        |
| 1.075699446 | 0.002911677 | 2.18E-07 | 11 | Qtrt1         |
| 0.69481435  | 0.003012963 | 2.26E-07 | 11 | Cmtr1         |
| 1.224464899 | 0.003144096 | 2.35E-07 | 11 | Zyg11b        |
| 1.018414362 | 0.003151008 | 2.36E-07 | 11 | Drg1          |
| 0.955926204 | 0.003242766 | 2.43E-07 | 11 | Slamf9        |
| 1.220584625 | 0.003247158 | 2.43E-07 | 11 | Mgl2          |
| 0.956616521 | 0.003268884 | 2.45E-07 | 11 | Klhl7         |
| 0.750084384 | 0.003291039 | 2.46E-07 | 11 | Taf1a         |
| 1.001297637 | 0.003383676 | 2.53E-07 | 11 | Vma21         |
| 1.129466188 | 0.003409851 | 2.55E-07 | 11 | Ttc14         |
| 1.322983437 | 0.003459889 | 2.59E-07 | 11 | Milr1         |
| 0.582623218 | 0.003495927 | 2.62E-07 | 11 | B630005N14Rik |
| 0.5447312   | 0.003517628 | 2.63E-07 | 11 | Tspan33       |
| 1.005847721 | 0.003633881 | 2.72E-07 | 11 | Nsmce1        |
| 1.220954936 | 0.003638509 | 2.73E-07 | 11 | Pcp4l1        |
| 0.78401452  | 0.003775299 | 2.83E-07 | 11 | Tpra1         |
| 1.010792272 | 0.003945058 | 2.95E-07 | 11 | Chchd1        |
| 1.201671715 | 0.004242722 | 3.18E-07 | 11 | Ccdc101       |
| 0.652363464 | 0.004342991 | 3.25E-07 | 11 | Unc119        |
| 0.982765117 | 0.004421846 | 3.31E-07 | 11 | Mbnl2         |
| 1.221812683 | 0.004456863 | 3.34E-07 | 11 | Ptpmt1        |
| 1.027280472 | 0.004585755 | 3.43E-07 | 11 | Mrps7         |
| 0.983245153 | 0.004620587 | 3.46E-07 | 11 | Tmem167       |
| 1.457713058 | 0.004667199 | 3.50E-07 | 11 | Svil          |
| 0.953516215 | 0.00473246  | 3.54E-07 | 11 | Strip1        |
| 0.917088498 | 0.004740384 | 3.55E-07 | 11 | Rnf126        |
| 1.074988673 | 0.004779982 | 3.58E-07 | 11 | Tmem135       |
| 0.953488813 | 0.004807736 | 3.60E-07 | 11 | Ptafr         |
| 1.144384813 | 0.004817977 | 3.61E-07 | 11 | Pqlc1         |
| 1.222805847 | 0.004914576 | 3.68E-07 | 11 | Elf4          |
| 0.91079932  | 0.004953513 | 3.71E-07 | 11 | Slc35c2       |
| 0.885921906 | 0.005024842 | 3.76E-07 | 11 | Zfp335        |
| 1.156671635 | 0.005172269 | 3.87E-07 | 11 | Etv3          |
| 0.798922892 | 0.005336843 | 4.00E-07 | 11 | Sec24d        |
| 0.903584401 | 0.005467375 | 4.09E-07 | 11 | Ripk2         |
| 0.814708247 | 0.005549406 | 4.16E-07 | 11 | Zfp451        |
| 0.768761497 | 0.00559539  | 4.19E-07 | 11 | Lymr4         |
| 0.94784178  | 0.00562859  | 4.22E-07 | 11 | Ndufaf1       |
| 0.900706537 | 0.005662893 | 4.24E-07 | 11 | Tnpo2         |
| 1.242654155 | 0.005684437 | 4.26E-07 | 11 | Pogk          |
| 0.790466722 | 0.005701991 | 4.27E-07 | 11 | Dyrk3         |
| 0.996397088 | 0.005852217 | 4.38E-07 | 11 | Pdrg1         |

|             |             |          |    |               |
|-------------|-------------|----------|----|---------------|
| 0.87384438  | 0.006128157 | 4.59E-07 | 11 | Cbfa2t3       |
| 0.884326401 | 0.00615964  | 4.61E-07 | 11 | Wdr43         |
| 0.397364039 | 0.006304667 | 4.72E-07 | 11 | Recql         |
| 0.819778706 | 0.006542538 | 4.90E-07 | 11 | Slc7a2        |
| 1.342300369 | 0.006545984 | 4.90E-07 | 11 | Acvr1         |
| 0.752554623 | 0.006729341 | 5.04E-07 | 11 | 2810008D09Rik |
| 1.074692622 | 0.006936589 | 5.20E-07 | 11 | Cnot1         |
| 0.829279355 | 0.006967059 | 5.22E-07 | 11 | Vcpkmt        |
| 0.602917482 | 0.007052117 | 5.28E-07 | 11 | Tfrc          |
| 1.011575729 | 0.007230987 | 5.42E-07 | 11 | Fubp1         |
| 0.868564398 | 0.007263142 | 5.44E-07 | 11 | Foxn3         |
| 0.673518801 | 0.007540645 | 5.65E-07 | 11 | Kat2b         |
| 0.900254261 | 0.00763203  | 5.72E-07 | 11 | 0610010F05Rik |
| 1.086541756 | 0.00767047  | 5.74E-07 | 11 | Prpf3         |
| 0.909326872 | 0.007728202 | 5.79E-07 | 11 | Iqcb1         |
| 1.06372783  | 0.007809488 | 5.85E-07 | 11 | Mrps21        |
| 1.219954988 | 0.00785778  | 5.89E-07 | 11 | Desi2         |
| 0.97404929  | 0.00797962  | 5.98E-07 | 11 | Apbb2         |
| 0.965939887 | 0.008207688 | 6.15E-07 | 11 | Atp2b4        |
| 1.112382769 | 0.008266895 | 6.19E-07 | 11 | Clec4n        |
| 0.674454139 | 0.008317933 | 6.23E-07 | 11 | Slc38a7       |
| 0.93497894  | 0.008559991 | 6.41E-07 | 11 | Mgrn1         |
| 2.397462778 | 0.008721241 | 6.53E-07 | 11 | Fgfr1op       |
| 0.666562233 | 0.008914777 | 6.68E-07 | 11 | Pard6a        |
| 1.161166602 | 0.008967753 | 6.72E-07 | 11 | Arhgap1       |
| 1.117369507 | 0.009174214 | 6.87E-07 | 11 | Ormdl2        |
| 0.952058903 | 0.009488043 | 7.11E-07 | 11 | N4bp1         |
| 0.9343602   | 0.009663247 | 7.24E-07 | 11 | Dstn          |
| 0.936616131 | 0.009724575 | 7.28E-07 | 11 | Cd109         |
| 0.938792373 | 0.009932672 | 7.44E-07 | 11 | Sec63         |
| 0.97688319  | 0.010012606 | 7.50E-07 | 11 | Swap70        |
| 0.852630116 | 0.010045043 | 7.52E-07 | 11 | Hmces         |
| 0.798357246 | 0.010089241 | 7.56E-07 | 11 | Guca1a        |
| 0.98945093  | 0.010322669 | 7.73E-07 | 11 | Atp8b4        |
| 0.971832103 | 0.010494832 | 7.86E-07 | 11 | St6gal1       |
| 1.009497861 | 0.010627123 | 7.96E-07 | 11 | Abhd12        |
| 0.865107237 | 0.010751053 | 8.05E-07 | 11 | Srxn1         |
| 0.483344203 | 0.010807094 | 8.09E-07 | 11 | Rad50         |
| 0.849226966 | 0.011092808 | 8.31E-07 | 11 | Ccnk          |
| 0.951061451 | 0.011107091 | 8.32E-07 | 11 | Ccr2          |
| 0.764535263 | 0.011109531 | 8.32E-07 | 11 | Zfp53         |
| 0.86987304  | 0.011211225 | 8.40E-07 | 11 | Osbpl8        |
| 0.886451971 | 0.011256255 | 8.43E-07 | 11 | Chst12        |
| 0.846541965 | 0.011391447 | 8.53E-07 | 11 | Tmed9         |
| 0.688373902 | 0.01149375  | 8.61E-07 | 11 | Gphn          |
| 0.8948649   | 0.011709973 | 8.77E-07 | 11 | Atg13         |
| 0.402121422 | 0.011842544 | 8.87E-07 | 11 | Dag1          |
| 0.909314    | 0.012015689 | 9.00E-07 | 11 | Pxdc1         |
| 0.778813609 | 0.012308986 | 9.22E-07 | 11 | Traf7         |
| 0.889090417 | 0.012329924 | 9.23E-07 | 11 | 6330407A03Rik |
| 0.89412571  | 0.012332803 | 9.24E-07 | 11 | 1810011H11Rik |
| 0.712246338 | 0.012517721 | 9.38E-07 | 11 | Nom1          |
| 1.051077487 | 0.013815383 | 1.03E-06 | 11 | Ifngr2        |
| 1.079859921 | 0.013975497 | 1.05E-06 | 11 | Ralgds        |
| 0.651535087 | 0.014359593 | 1.08E-06 | 11 | Ell           |
| 1.29336431  | 0.014414107 | 1.08E-06 | 11 | Nes           |
| 0.922142809 | 0.014485139 | 1.08E-06 | 11 | Fgd3          |
| 0.785699109 | 0.014498852 | 1.09E-06 | 11 | AW112010      |
| 0.475782281 | 0.01450817  | 1.09E-06 | 11 | Mthfd1        |
| 1.007284358 | 0.014782866 | 1.11E-06 | 11 | Tcn2          |
| 1.023760308 | 0.015235517 | 1.14E-06 | 11 | Acot8         |

|             |             |          |    |               |
|-------------|-------------|----------|----|---------------|
| 1.085011096 | 0.015972926 | 1.20E-06 | 11 | Slc31a2       |
| 1.069990077 | 0.016832128 | 1.26E-06 | 11 | Anapc16       |
| 1.142540535 | 0.017012413 | 1.27E-06 | 11 | Mvp           |
| 0.981367835 | 0.017174522 | 1.29E-06 | 11 | Vimp          |
| 0.71960485  | 0.017539749 | 1.31E-06 | 11 | Glce          |
| 0.962710502 | 0.017601168 | 1.32E-06 | 11 | 1110038B12Rik |
| 1.08487034  | 0.01873212  | 1.40E-06 | 11 | Neurl2        |
| 1.013710238 | 0.019009531 | 1.42E-06 | 11 | Plbd1         |
| 0.818191682 | 0.019083868 | 1.43E-06 | 11 | Mex3c         |
| 0.976807988 | 0.019177742 | 1.44E-06 | 11 | Actr1a        |
| 0.926809941 | 0.019297235 | 1.45E-06 | 11 | Serpine1      |
| 0.975888624 | 0.019520374 | 1.46E-06 | 11 | Elof1         |
| 0.937981393 | 0.019748717 | 1.48E-06 | 11 | Prpf8         |
| 0.963488346 | 0.020199647 | 1.51E-06 | 11 | Ifi27         |
| 1.185637291 | 0.020236985 | 1.52E-06 | 11 | Chchd4        |
| 0.862066132 | 0.02056572  | 1.54E-06 | 11 | Mtx1          |
| 0.772359558 | 0.02100236  | 1.57E-06 | 11 | Dgka          |
| 0.506891271 | 0.022815218 | 1.71E-06 | 11 | Bcr           |
| 0.643161559 | 0.023186581 | 1.74E-06 | 11 | Orc6          |
| 1.050584722 | 0.023445216 | 1.76E-06 | 11 | Cflar         |
| 0.60343422  | 0.023760747 | 1.78E-06 | 11 | Nsmce4a       |
| 0.949761331 | 0.024742106 | 1.85E-06 | 11 | Ramp1         |
| 0.765317552 | 0.024850485 | 1.86E-06 | 11 | Tsc22d2       |
| 1.020364966 | 0.025286259 | 1.89E-06 | 11 | Clec5a        |
| 0.504310943 | 0.025631845 | 1.92E-06 | 11 | C920009B18Rik |
| 0.846270745 | 0.025861298 | 1.94E-06 | 11 | Ehd1          |
| 0.72855011  | 0.026052638 | 1.95E-06 | 11 | Chtop         |
| 0.359785628 | 0.026211043 | 1.96E-06 | 11 | Insr          |
| 0.983787225 | 0.026462785 | 1.98E-06 | 11 | Cirh1a        |
| 0.625449586 | 0.026562056 | 1.99E-06 | 11 | Kmo           |
| 0.49908541  | 0.027145077 | 2.03E-06 | 11 | Nifk          |
| 0.727259787 | 0.027746622 | 2.08E-06 | 11 | Fam120aos     |
| 1.277985487 | 0.027987095 | 2.10E-06 | 11 | Ubr3          |
| 0.917866681 | 0.02813367  | 2.11E-06 | 11 | Mettl17       |
| 1.097482001 | 0.028571416 | 2.14E-06 | 11 | Pilrb1        |
| 0.884551005 | 0.028654825 | 2.15E-06 | 11 | Itfg1         |
| 0.873695214 | 0.029821242 | 2.23E-06 | 11 | Tbc1d9b       |
| 0.916458303 | 0.030194917 | 2.26E-06 | 11 | Mcts1         |
| 0.908729023 | 0.030399387 | 2.28E-06 | 11 | Arfrp1        |
| 0.429863207 | 0.030562928 | 2.29E-06 | 11 | Dync2h1       |
| 0.504546887 | 0.030844648 | 2.31E-06 | 11 | Serpinb6b     |
| 1.143354074 | 0.031077316 | 2.33E-06 | 11 | Rchy1         |
| 0.930513954 | 0.031188238 | 2.34E-06 | 11 | Odc1          |
| 1.090585051 | 0.03237885  | 2.43E-06 | 11 | Bmi1          |
| 0.874286225 | 0.033630741 | 2.52E-06 | 11 | Ndufb7        |
| 0.950309534 | 0.034458242 | 2.58E-06 | 11 | Csf2rb2       |
| 1.12551181  | 0.035600768 | 2.67E-06 | 11 | Yipf3         |
| 0.84989986  | 0.036694181 | 2.75E-06 | 11 | Tubgcp3       |
| 0.816817588 | 0.036841903 | 2.76E-06 | 11 | Adnp          |
| 0.434377887 | 0.037784876 | 2.83E-06 | 11 | Zfp74         |
| 2.394046514 | 0.039642057 | 2.97E-06 | 11 | Rapgef2       |
| 0.770438855 | 0.040953311 | 3.07E-06 | 11 | Lrrc28        |
| 1.003944006 | 0.041106877 | 3.08E-06 | 11 | Aim1          |
| 0.861735717 | 0.041122698 | 3.08E-06 | 11 | Stap1         |
| 1.223520679 | 0.041684029 | 3.12E-06 | 11 | Znrd1         |
| 0.76606248  | 0.042041684 | 3.15E-06 | 11 | Pttg1         |
| 0.804967169 | 0.042394044 | 3.18E-06 | 11 | Mrpl34        |
| 0.851711956 | 0.042572327 | 3.19E-06 | 11 | Sde2          |
| 0.488519866 | 0.042893848 | 3.21E-06 | 11 | Klhl25        |
| 0.821905294 | 0.042951082 | 3.22E-06 | 11 | D10Jhu81e     |
| 0.742070821 | 0.043620624 | 3.27E-06 | 11 | Arhgap11a     |

|              |             |          |    |               |
|--------------|-------------|----------|----|---------------|
| 0.642388789  | 0.044260094 | 3.31E-06 | 11 | Zswim8        |
| 0.903570391  | 0.044543587 | 3.34E-06 | 11 | Nfkb1         |
| 0.272366271  | 0.045067626 | 3.38E-06 | 11 | 4831440E17Rik |
| 0.699966258  | 0.045386591 | 3.40E-06 | 11 | Rnf146        |
| 1.125168053  | 0.045431858 | 3.40E-06 | 11 | Arhgef10l     |
| 0.894893396  | 0.046579127 | 3.49E-06 | 11 | Myo7a         |
| 0.674650321  | 0.048287537 | 3.62E-06 | 11 | Dis3l         |
| 0.632454508  | 0.049064936 | 3.67E-06 | 11 | Timm17b       |
| 1.076049468  | 0.049505253 | 3.71E-06 | 11 | Tmem263       |
| 0.794754305  | 0.049745408 | 3.73E-06 | 11 | Prpf38a       |
| 0.768861153  | 0.049929102 | 3.74E-06 | 11 | Adam15        |
| 0.788979733  | 0.050734519 | 3.80E-06 | 11 | Mdm2          |
| 0.697601531  | 0.050796062 | 3.80E-06 | 11 | Csnk1g3       |
| 1.288002767  | 0.05082152  | 3.81E-06 | 11 | Mrpl43        |
| 0.813137769  | 0.050958051 | 3.82E-06 | 11 | Farsa         |
| 0.761904767  | 0.051848555 | 3.88E-06 | 11 | Fam117b       |
| 0.47545042   | 0.052700191 | 3.95E-06 | 11 | Vbp1          |
| 0.783225171  | 0.053015954 | 3.97E-06 | 11 | Gpr171        |
| 1.077664788  | 0.053087494 | 3.98E-06 | 11 | Timm8b        |
| 0.517124426  | 0.053333757 | 3.99E-06 | 11 | Capn7         |
| 1.198433535  | 0.053408721 | 4.00E-06 | 11 | Kidins220     |
| 0.880235324  | 0.053489862 | 4.01E-06 | 11 | Denr          |
| 0.921086904  | 0.054259511 | 4.06E-06 | 11 | Surf1         |
| 0.496180597  | 0.054334559 | 4.07E-06 | 11 | 2410004N09Rik |
| 0.50817099   | 0.055164579 | 4.13E-06 | 11 | Cdca4         |
| 1.163163112  | 0.056629078 | 4.24E-06 | 11 | Fcrls         |
| 1.13150507   | 0.056681589 | 4.25E-06 | 11 | Gtf2h2        |
| 0.698526273  | 0.056998158 | 4.27E-06 | 11 | Upf2          |
| 0.860235548  | 0.057205355 | 4.28E-06 | 11 | Bcap31        |
| 1.030437499  | 0.058042593 | 4.35E-06 | 11 | Sumf1         |
| 1.413244048  | 0.059172538 | 4.43E-06 | 11 | Pdcd6         |
| 0.713881661  | 0.059341684 | 4.44E-06 | 11 | Coq3          |
| 0.952867013  | 0.059491195 | 4.46E-06 | 11 | Pon3          |
| 0.853571126  | 0.060039922 | 4.50E-06 | 11 | Rela          |
| 0.915812377  | 0.060557915 | 4.54E-06 | 11 | Dnmt3a        |
| 1.261114113  | 0.061077426 | 4.57E-06 | 11 | Slk           |
| 0.924383032  | 0.06124006  | 4.59E-06 | 11 | Elp5          |
| 0.684127611  | 0.061419677 | 4.60E-06 | 11 | Rusc2         |
| 1.082444713  | 0.061494576 | 4.61E-06 | 11 | Sntb2         |
| 0.83390685   | 0.063053248 | 4.72E-06 | 11 | Uty           |
| 0.788568928  | 0.063523975 | 4.76E-06 | 11 | Psemb4        |
| 0.598555224  | 0.064001682 | 4.79E-06 | 11 | Bin3          |
| 0.763187251  | 0.064002917 | 4.79E-06 | 11 | Sh2b3         |
| 0.620443083  | 0.064479229 | 4.83E-06 | 11 | Nt5c2         |
| 0.290012152  | 0.065667189 | 4.92E-06 | 11 | B3gnt1l       |
| 0.751447407  | 0.065836261 | 4.93E-06 | 11 | Arl6ip6       |
| 0.552554626  | 0.065849438 | 4.93E-06 | 11 | Fkbp4         |
| 0.569617795  | 0.066059438 | 4.95E-06 | 11 | Daam1         |
| 1.169420908  | 0.067673711 | 5.07E-06 | 11 | Stk16         |
| 0.588025928  | 0.06838339  | 5.12E-06 | 11 | Bdp1          |
| -1.258862928 | 0.069302714 | 5.19E-06 | 11 | Rps26         |
| 0.89235616   | 0.069481726 | 5.20E-06 | 11 | Nab1          |
| 0.829541132  | 0.07012915  | 5.25E-06 | 11 | Tnfaip2       |
| 0.956222948  | 0.07157595  | 5.36E-06 | 11 | Plod1         |
| 1.026594793  | 0.071812462 | 5.38E-06 | 11 | Brms1         |
| 0.820510135  | 0.072084629 | 5.40E-06 | 11 | Edem1         |
| 0.932285694  | 0.072298898 | 5.41E-06 | 11 | Rftn1         |
| 1.368215844  | 0.07246767  | 5.43E-06 | 11 | Tnfsf9        |
| 1.223093846  | 0.073641028 | 5.52E-06 | 11 | Rpgrip1       |
| 1.689344944  | 0.074539914 | 5.58E-06 | 11 | Hipk1         |
| 1.022615566  | 0.075258974 | 5.64E-06 | 11 | Dhx57         |

|              |             |          |    |           |
|--------------|-------------|----------|----|-----------|
| 1.016877969  | 0.076857215 | 5.76E-06 | 11 | Tmem120a  |
| 0.751070845  | 0.076995083 | 5.77E-06 | 11 | Zbtb2     |
| 0.637680787  | 0.077163294 | 5.78E-06 | 11 | Dhrs9     |
| 0.530321071  | 0.077665449 | 5.82E-06 | 11 | Smg6      |
| 0.735320565  | 0.077804402 | 5.83E-06 | 11 | Ktn1      |
| 0.936265623  | 0.077818961 | 5.83E-06 | 11 | Osbpl9    |
| 0.90744615   | 0.077837614 | 5.83E-06 | 11 | Ndufs8    |
| 0.251608914  | 0.079680244 | 5.97E-06 | 11 | Agmo      |
| 0.988547462  | 0.079744853 | 5.97E-06 | 11 | Cav2      |
| -1.520328922 | 0.079938298 | 5.99E-06 | 11 | Jund      |
| 0.8525089    | 0.080296555 | 6.01E-06 | 11 | Hnrnpf    |
| 0.999739276  | 0.081080745 | 6.07E-06 | 11 | Ccl2      |
| 1.104964499  | 0.081563535 | 6.11E-06 | 11 | Creb5     |
| 0.934855735  | 0.082778765 | 6.20E-06 | 11 | Secisbp2l |
| 0.752541538  | 0.082884513 | 6.21E-06 | 11 | Stx3      |
| 0.973112017  | 0.082952513 | 6.21E-06 | 11 | Xpr1      |
| 1.07941835   | 0.084351918 | 6.32E-06 | 11 | Kif3a     |
| 0.927876282  | 0.085447036 | 6.40E-06 | 11 | Nploc4    |
| 0.469582665  | 0.086189617 | 6.46E-06 | 11 | Cish      |
| 0.469296577  | 0.086837331 | 6.50E-06 | 11 | Rqcd1     |
| 1.129170599  | 0.087310763 | 6.54E-06 | 11 | Ell2      |
| 0.954822687  | 0.088388009 | 6.62E-06 | 11 | Usp16     |
| 0.929565523  | 0.088637984 | 6.64E-06 | 11 | Ccdc97    |
| 0.876893489  | 0.089575403 | 6.71E-06 | 11 | Dnajc14   |
| 0.784362278  | 0.090310704 | 6.76E-06 | 11 | Atp1b3    |
| 0.668345922  | 0.092031643 | 6.89E-06 | 11 | Mphosph10 |
| 0.757022598  | 0.092121821 | 6.90E-06 | 11 | Mrpl28    |
| 1.079981975  | 0.092194348 | 6.90E-06 | 11 | Cdk18     |
| 0.755364456  | 0.092537435 | 6.93E-06 | 11 | Gusb      |
| 0.593544838  | 0.093782095 | 7.02E-06 | 11 | Swi5      |
| 0.625597496  | 0.094435323 | 7.07E-06 | 11 | Zfp90     |
| 0.718934186  | 0.097468601 | 7.30E-06 | 11 | Chd7      |
| 0.935736457  | 0.098264693 | 7.36E-06 | 11 | Eif1ax    |
| 0.761043248  | 0.098402105 | 7.37E-06 | 11 | Vps16     |
| 0.875678266  | 0.098913905 | 7.41E-06 | 11 | Bre       |
| 0.688808779  | 0.099639151 | 7.46E-06 | 11 | Hes1      |
| 0.574804745  | 0.100391054 | 7.52E-06 | 11 | Fam120b   |
| 0.836925471  | 0.100790321 | 7.55E-06 | 11 | Cyc1      |
| 1.150446887  | 0.101900837 | 7.63E-06 | 11 | Ift52     |
| 0.417190829  | 0.103467996 | 7.75E-06 | 11 | lqce      |
| 0.96778377   | 0.104569807 | 7.83E-06 | 11 | Pigyl     |
| 0.764535263  | 0.104895897 | 7.86E-06 | 11 | Parvb     |
| 0.960829493  | 0.105146084 | 7.87E-06 | 11 | Surf2     |
| 1.065619508  | 0.105347607 | 7.89E-06 | 11 | Polr1d    |
| 1.67240177   | 0.10623687  | 7.96E-06 | 11 | Pdgfa     |
| 0.549834987  | 0.106935272 | 8.01E-06 | 11 | Aldh16a1  |
| 0.842382936  | 0.108167503 | 8.10E-06 | 11 | Pdpn      |
| 0.738375326  | 0.109679977 | 8.21E-06 | 11 | Nubp2     |
| 0.707451612  | 0.109694876 | 8.22E-06 | 11 | Siah2     |
| 1.88469176   | 0.110782754 | 8.30E-06 | 11 | Nktr      |
| 0.913237144  | 0.110989328 | 8.31E-06 | 11 | Anapc2    |
| 0.973691806  | 0.111427392 | 8.35E-06 | 11 | Gm11974   |
| 0.475134306  | 0.111827922 | 8.38E-06 | 11 | Clec2d    |
| 0.667435583  | 0.113417779 | 8.49E-06 | 11 | Tspo      |
| 0.610641553  | 0.113531775 | 8.50E-06 | 11 | Chchd7    |
| 0.385256021  | 0.11568735  | 8.66E-06 | 11 | Uimc1     |
| 0.77798606   | 0.116008896 | 8.69E-06 | 11 | Tomm40    |
| 0.690598597  | 0.11910715  | 8.92E-06 | 11 | Ubr4      |
| 0.680544838  | 0.119663503 | 8.96E-06 | 11 | Sifn2     |
| 0.853248545  | 0.119940933 | 8.98E-06 | 11 | Bcl2l1    |
| 0.802140623  | 0.124136726 | 9.30E-06 | 11 | Ten1      |

|              |             |          |    |               |
|--------------|-------------|----------|----|---------------|
| 0.665429278  | 0.126863125 | 9.50E-06 | 11 | Tmem134       |
| 0.68043232   | 0.131245101 | 9.83E-06 | 11 | Trpc4ap       |
| 0.651294743  | 0.132578438 | 9.93E-06 | 11 | Myeov2        |
| 0.955137452  | 0.132745356 | 9.94E-06 | 11 | Tmem106a      |
| 0.879649714  | 0.132882727 | 9.95E-06 | 11 | Edc3          |
| 0.679348091  | 0.133807717 | 1.00E-05 | 11 | Tbc1d4        |
| 0.85074334   | 0.134624726 | 1.01E-05 | 11 | Ddx21         |
| 0.758081314  | 0.134808448 | 1.01E-05 | 11 | Ddit4         |
| 0.787351816  | 0.135776676 | 1.02E-05 | 11 | Ddx1          |
| 1.014047511  | 0.138488105 | 1.04E-05 | 11 | Smad4         |
| 0.72697614   | 0.138809359 | 1.04E-05 | 11 | Gpr126        |
| 0.616544947  | 0.143186929 | 1.07E-05 | 11 | Zfyve1        |
| 0.696809381  | 0.143499625 | 1.07E-05 | 11 | Ube3a         |
| 0.657700249  | 0.143737642 | 1.08E-05 | 11 | Ppp2r2a       |
| 0.533081017  | 0.145859672 | 1.09E-05 | 11 | Ube2v1        |
| 0.818003143  | 0.147115697 | 1.10E-05 | 11 | Cep350        |
| 0.598403943  | 0.147514482 | 1.10E-05 | 11 | Xrcc5         |
| -1.047823555 | 0.147828148 | 1.11E-05 | 11 | Calr          |
| 0.892286091  | 0.151384298 | 1.13E-05 | 11 | Cpsf3l        |
| 0.806871478  | 0.153149071 | 1.15E-05 | 11 | BC029214      |
| 0.678260202  | 0.15352767  | 1.15E-05 | 11 | 1700020I14Rik |
| 0.646522301  | 0.154251744 | 1.16E-05 | 11 | Brap          |
| 0.788106545  | 0.155272562 | 1.16E-05 | 11 | Atraid        |
| 0.690041959  | 0.156529878 | 1.17E-05 | 11 | Stx12         |
| 0.638180202  | 0.157577339 | 1.18E-05 | 11 | Mak16         |
| 0.984828721  | 0.158460227 | 1.19E-05 | 11 | Tspan4        |
| 0.937672559  | 0.161575174 | 1.21E-05 | 11 | Emb           |
| 0.824846636  | 0.165925288 | 1.24E-05 | 11 | Capn2         |
| 0.624423789  | 0.167615968 | 1.26E-05 | 11 | Phlpp1        |
| 0.670021642  | 0.170184189 | 1.27E-05 | 11 | Basp1         |
| 1.005091652  | 0.172362134 | 1.29E-05 | 11 | Pbxip1        |
| 0.849151429  | 0.175476578 | 1.31E-05 | 11 | Bscl2         |
| 0.709043572  | 0.177920862 | 1.33E-05 | 11 | Gppbp1        |
| 1.036446212  | 0.178071368 | 1.33E-05 | 11 | Slc31a1       |
| 0.82526234   | 0.178409281 | 1.34E-05 | 11 | Dnajb1        |
| 0.840304825  | 0.178850154 | 1.34E-05 | 11 | Stag1         |
| 1.053185165  | 0.18033396  | 1.35E-05 | 11 | Baiap2        |
| 0.822383774  | 0.181400719 | 1.36E-05 | 11 | Cux1          |
| 1.000399738  | 0.182148257 | 1.36E-05 | 11 | Golph3l       |
| 0.328978025  | 0.182661287 | 1.37E-05 | 11 | Gmcl1         |
| 0.717477387  | 0.183263402 | 1.37E-05 | 11 | S100a4        |
| 0.665104285  | 0.187714315 | 1.41E-05 | 11 | Nedd8         |
| 0.811260849  | 0.193733237 | 1.45E-05 | 11 | Dtd2          |
| 0.594206228  | 0.194862256 | 1.46E-05 | 11 | Rpl27a        |
| 0.858707896  | 0.195062071 | 1.46E-05 | 11 | Jak2          |
| 0.829350674  | 0.197406369 | 1.48E-05 | 11 | Tnfrsf12a     |
| 0.989785008  | 0.200704627 | 1.50E-05 | 11 | Sh3kbp1       |
| 1.198274028  | 0.203712457 | 1.53E-05 | 11 | Rap2a         |
| 0.964489142  | 0.212849152 | 1.59E-05 | 11 | Snx20         |
| 0.626761736  | 0.216615501 | 1.62E-05 | 11 | Arsk          |
| 0.809189701  | 0.221187963 | 1.66E-05 | 11 | Smcarb1       |
| 0.7137217    | 0.223832558 | 1.68E-05 | 11 | Dnajc5        |
| 0.495668731  | 0.224565081 | 1.68E-05 | 11 | Man2c1        |
| 0.608477725  | 0.224656781 | 1.68E-05 | 11 | Pet112        |
| 0.7887209    | 0.227200206 | 1.70E-05 | 11 | Pmp22         |
| 0.714698321  | 0.231414787 | 1.73E-05 | 11 | Chd3          |
| 1.963969503  | 0.231917607 | 1.74E-05 | 11 | Rnf6          |
| 0.542477748  | 0.231963303 | 1.74E-05 | 11 | Lbr           |
| 0.588137604  | 0.236497508 | 1.77E-05 | 11 | Metap1d       |
| 1.262257662  | 0.2453487   | 1.84E-05 | 11 | Tppp3         |
| 0.642883576  | 0.252014367 | 1.89E-05 | 11 | Csf2ra        |

|              |             |          |    |               |
|--------------|-------------|----------|----|---------------|
| 1.049184369  | 0.258011668 | 1.93E-05 | 11 | Etfdh         |
| 0.708095724  | 0.260513466 | 1.95E-05 | 11 | Rxb           |
| 0.603838487  | 0.263135872 | 1.97E-05 | 11 | Nlrp3         |
| 0.419040968  | 0.263281218 | 1.97E-05 | 11 | Ino80b        |
| 0.934766285  | 0.265518255 | 1.99E-05 | 11 | Mfsd5         |
| 1.183451169  | 0.267475531 | 2.00E-05 | 11 | Slc38a1       |
| 1.030193745  | 0.276517263 | 2.07E-05 | 11 | Pank3         |
| 0.629239176  | 0.27698329  | 2.07E-05 | 11 | Mgst3         |
| 0.373076662  | 0.281095694 | 2.11E-05 | 11 | Inpp1         |
| 0.919436769  | 0.282139564 | 2.11E-05 | 11 | Pak1ip1       |
| 0.637204748  | 0.28806042  | 2.16E-05 | 11 | Flna          |
| 0.536051107  | 0.295649109 | 2.21E-05 | 11 | Ptgr1         |
| 0.423045075  | 0.299364491 | 2.24E-05 | 11 | F11r          |
| 0.833334519  | 0.302171926 | 2.26E-05 | 11 | Snrnp200      |
| 0.656833559  | 0.304017073 | 2.28E-05 | 11 | Smim12        |
| 0.518596824  | 0.304045492 | 2.28E-05 | 11 | Ccny          |
| 1.192139162  | 0.307962989 | 2.31E-05 | 11 | Nop9          |
| 0.73218912   | 0.308975849 | 2.31E-05 | 11 | Emc2          |
| 0.689635959  | 0.314155141 | 2.35E-05 | 11 | Atf6          |
| 0.817668728  | 0.320104036 | 2.40E-05 | 11 | C1qbp         |
| 0.770128436  | 0.320205495 | 2.40E-05 | 11 | Ostm1         |
| 0.498989225  | 0.322041921 | 2.41E-05 | 11 | P2ry10        |
| 0.596360491  | 0.342212181 | 2.56E-05 | 11 | Jmjd1c        |
| 0.719647695  | 0.344705416 | 2.58E-05 | 11 | 0610012G03Rik |
| 0.944278382  | 0.346363208 | 2.59E-05 | 11 | Cct3          |
| 0.733074081  | 0.350974716 | 2.63E-05 | 11 | Rel           |
| 0.79037307   | 0.353199492 | 2.65E-05 | 11 | Specc1        |
| 0.811849736  | 0.365986619 | 2.74E-05 | 11 | Clec4d        |
| 0.636782917  | 0.371588102 | 2.78E-05 | 11 | Arhgef1       |
| 0.749119304  | 0.373502385 | 2.80E-05 | 11 | Il4ra         |
| 0.637997694  | 0.373533525 | 2.80E-05 | 11 | Rab32         |
| 0.729933632  | 0.376168562 | 2.82E-05 | 11 | Hccs          |
| 0.504726524  | 0.378707689 | 2.84E-05 | 11 | 1500011K16Rik |
| 0.592469721  | 0.382926302 | 2.87E-05 | 11 | Rab24         |
| 0.530671585  | 0.387825718 | 2.90E-05 | 11 | Pgap2         |
| 0.619697036  | 0.388623591 | 2.91E-05 | 11 | Plbd2         |
| 0.749591483  | 0.393469149 | 2.95E-05 | 11 | Ptpn2         |
| 0.519402715  | 0.394502601 | 2.95E-05 | 11 | Gpn1          |
| 1.102662873  | 0.395479145 | 2.96E-05 | 11 | Mcmbp         |
| 0.778764476  | 0.395990737 | 2.97E-05 | 11 | Gpr137b-ps    |
| 0.529224746  | 0.396447303 | 2.97E-05 | 11 | Slc4a1ap      |
| 0.623641601  | 0.397318575 | 2.98E-05 | 11 | Hmgn5         |
| 0.779765165  | 0.397581214 | 2.98E-05 | 11 | Cytip         |
| 0.384667068  | 0.400876977 | 3.00E-05 | 11 | Pias4         |
| 0.501958173  | 0.402425162 | 3.01E-05 | 11 | 2810013P06Rik |
| 0.462301311  | 0.404281525 | 3.03E-05 | 11 | Trip4         |
| 0.587995992  | 0.407525028 | 3.05E-05 | 11 | Acly          |
| 0.555133814  | 0.408155374 | 3.06E-05 | 11 | Dpp9          |
| 0.968136347  | 0.409009433 | 3.06E-05 | 11 | Scyl2         |
| 0.831374197  | 0.419915223 | 3.14E-05 | 11 | Acsl1         |
| 0.813746642  | 0.423336419 | 3.17E-05 | 11 | Pgk1          |
| 0.737627942  | 0.42501506  | 3.18E-05 | 11 | Rilpl2        |
| -1.377232537 | 0.425293612 | 3.19E-05 | 11 | Gm1821        |
| 1.061855964  | 0.434437533 | 3.25E-05 | 11 | Fdx1          |
| 0.592131755  | 0.436916184 | 3.27E-05 | 11 | Hmbs          |
| 0.726276186  | 0.4382952   | 3.28E-05 | 11 | Fam110a       |
| 0.457091518  | 0.438741559 | 3.29E-05 | 11 | Pank2         |
| 0.896061195  | 0.442859302 | 3.32E-05 | 11 | Pqlc2         |
| 0.724931498  | 0.450205092 | 3.37E-05 | 11 | Map3k11       |
| 0.780919005  | 0.455082507 | 3.41E-05 | 11 | Arid4b        |
| 0.717154488  | 0.458484178 | 3.43E-05 | 11 | Synj1         |



|              |             |          |    |               |
|--------------|-------------|----------|----|---------------|
| 0.614833467  | 0.472939296 | 3.54E-05 | 11 | Zfp568        |
| 0.616034561  | 0.473882375 | 3.55E-05 | 11 | Jarid2        |
| -1.983450771 | 0.475964469 | 3.56E-05 | 11 | Pirb          |
| 0.796443784  | 0.482450645 | 3.61E-05 | 11 | Pmepa1        |
| 0.51956036   | 0.490323229 | 3.67E-05 | 11 | Dcun1d2       |
| 0.426687177  | 0.492258704 | 3.69E-05 | 11 | Kctd10        |
| 0.350579788  | 0.497744378 | 3.73E-05 | 11 | Csgalnact2    |
| 0.753513204  | 0.5014079   | 3.76E-05 | 11 | Papss1        |
| 0.694652072  | 0.510995357 | 3.83E-05 | 11 | Rsb1l         |
| 0.834487444  | 0.521409182 | 3.91E-05 | 11 | Ckb           |
| 0.761215708  | 0.524418945 | 3.93E-05 | 11 | Cldn25        |
| 0.790301164  | 0.527561909 | 3.95E-05 | 11 | Pias2         |
| 0.640951838  | 0.528499137 | 3.96E-05 | 11 | Nol7          |
| 0.638811835  | 0.531578759 | 3.98E-05 | 11 | Srsf10        |
| 0.481787723  | 0.541660183 | 4.06E-05 | 11 | Cd59a         |
| 0.759854337  | 0.542591216 | 4.06E-05 | 11 | 2900026A02Rik |
| 1.145890068  | 0.546379757 | 4.09E-05 | 11 | Etf1          |
| -1.441328473 | 0.557328096 | 4.17E-05 | 11 | Sepp1         |
| 0.78811178   | 0.558602246 | 4.18E-05 | 11 | Map4k4        |
| -1.822480439 | 0.561742191 | 4.21E-05 | 11 | Gnb1          |
| 0.35807322   | 0.577168622 | 4.32E-05 | 11 | Nsun2         |
| 0.34077162   | 0.577759766 | 4.33E-05 | 11 | Wbp1l         |
| 0.532957614  | 0.578261952 | 4.33E-05 | 11 | Smarca2       |
| 1.887449158  | 0.578282819 | 4.33E-05 | 11 | Rest          |
| 0.52875953   | 0.578311933 | 4.33E-05 | 11 | Aak1          |
| 0.349140504  | 0.580590296 | 4.35E-05 | 11 | Smpd1         |
| 0.611661462  | 0.580969622 | 4.35E-05 | 11 | Chchd3        |
| 0.618763519  | 0.581765959 | 4.36E-05 | 11 | Zfp800        |
| 0.55627546   | 0.583551137 | 4.37E-05 | 11 | Raph1         |
| 0.723192902  | 0.589639245 | 4.42E-05 | 11 | Tcirg1        |
| 0.700160261  | 0.590219021 | 4.42E-05 | 11 | Yaf2          |
| 0.910042846  | 0.592071591 | 4.43E-05 | 11 | Psmc4         |
| 0.978169317  | 0.592523834 | 4.44E-05 | 11 | Tmem147       |
| 0.747022813  | 0.594150525 | 4.45E-05 | 11 | Mmp12         |
| 0.760037002  | 0.597176352 | 4.47E-05 | 11 | Pex11b        |
| 0.82401103   | 0.622784635 | 4.66E-05 | 11 | Cct7          |
| 0.653613215  | 0.624726429 | 4.68E-05 | 11 | Scaf8         |
| 0.750594391  | 0.628157572 | 4.70E-05 | 11 | Mdp1          |
| 0.631622716  | 0.629465779 | 4.71E-05 | 11 | Nars          |
| 0.408433056  | 0.634270279 | 4.75E-05 | 11 | Lrrc58        |
| -1.037986694 | 0.636140713 | 4.76E-05 | 11 | Lars2         |
| 0.268550291  | 0.640634041 | 4.80E-05 | 11 | Gdap10        |
| 0.545681475  | 0.642244897 | 4.81E-05 | 11 | Celf2         |
| 0.6024001    | 0.650530824 | 4.87E-05 | 11 | Appl1         |
| 0.815258056  | 0.651566379 | 4.88E-05 | 11 | Cpd           |
| 0.767745767  | 0.661465421 | 4.95E-05 | 11 | Cfh           |
| 0.421311117  | 0.671782727 | 5.03E-05 | 11 | Cxcr3         |
| 0.768254653  | 0.674551337 | 5.05E-05 | 11 | Dap           |
| 0.88486433   | 0.690594402 | 5.17E-05 | 11 | Aamdc         |
| 0.629327334  | 0.727995504 | 5.45E-05 | 11 | 1110007C09Rik |
| 0.600323638  | 0.731984833 | 5.48E-05 | 11 | Sgta          |
| 0.702397703  | 0.738827734 | 5.53E-05 | 11 | Rab10         |
| 0.702608062  | 0.742202378 | 5.56E-05 | 11 | Cdc34         |
| 0.719496499  | 0.750888822 | 5.62E-05 | 11 | Tmem140       |
| 0.458320942  | 0.755882966 | 5.66E-05 | 11 | 1600012H06Rik |
| 0.601016332  | 0.759249681 | 5.69E-05 | 11 | Inpp5d        |
| 0.718079056  | 0.759652948 | 5.69E-05 | 11 | Atg16l1       |
| 0.434853662  | 0.768949578 | 5.76E-05 | 11 | Zfp236        |
| 0.70617061   | 0.771023259 | 5.77E-05 | 11 | Nufip2        |
| 0.694859535  | 0.777229926 | 5.82E-05 | 11 | Zfp414        |
| 0.973931521  | 0.780671198 | 5.85E-05 | 11 | Pde4b         |

|             |             |          |    |               |
|-------------|-------------|----------|----|---------------|
| 0.783607346 | 0.783406437 | 5.87E-05 | 11 | Grk6          |
| 0.705054759 | 0.796330751 | 5.96E-05 | 11 | Tank          |
| 0.592890577 | 0.808527282 | 6.06E-05 | 11 | 1810043H04Rik |
| 0.443868745 | 0.810471532 | 6.07E-05 | 11 | Srek1         |
| 0.466184341 | 0.813392043 | 6.09E-05 | 11 | Tnks2         |
| 0.508524534 | 0.819498938 | 6.14E-05 | 11 | Pafah1b2      |
| 0.543093617 | 0.825679233 | 6.18E-05 | 11 | A830080D01Rik |
| 0.729401679 | 0.829864683 | 6.22E-05 | 11 | Baz1a         |
| 1.020974995 | 0.831417841 | 6.23E-05 | 11 | Cd83          |
| 0.77121218  | 0.832914779 | 6.24E-05 | 11 | Kansl3        |
| 0.876249314 | 0.835747796 | 6.26E-05 | 11 | A630007B06Rik |
| 1.116981947 | 0.835930435 | 6.26E-05 | 11 | Fn1           |
| 0.576990742 | 0.845597525 | 6.33E-05 | 11 | Cd96          |
| 0.900379709 | 0.850404496 | 6.37E-05 | 11 | Fam134b       |
| 0.669738303 | 0.853794754 | 6.39E-05 | 11 | Fam195b       |
| 0.522416957 | 0.865646286 | 6.48E-05 | 11 | Foxp1         |
| 0.761836679 | 0.870699545 | 6.52E-05 | 11 | Gars          |
| 0.597066212 | 0.896475337 | 6.71E-05 | 11 | Tra2a         |
| 0.620784484 | 0.903173484 | 6.76E-05 | 11 | Emc3          |
| 0.550952237 | 0.909302609 | 6.81E-05 | 11 | Eif4e         |
| 0.59181832  | 0.912223359 | 6.83E-05 | 11 | D8Ertd738e    |
| 0.385303592 | 0.924721177 | 6.93E-05 | 11 | Etv6          |
| 0.716028596 | 0.929674215 | 6.96E-05 | 11 | Olfm1         |
| 0.712101463 | 0.952889285 | 7.14E-05 | 11 | Cdr2          |
| 0.568156556 | 0.958021483 | 7.18E-05 | 11 | Ctns          |
| 0.802657532 | 0.9598586   | 7.19E-05 | 11 | Pdxk          |
| 0.666594457 | 0.960806387 | 7.20E-05 | 11 | Cebpg         |
| 0.3459231   | 0.962804177 | 7.21E-05 | 11 | Ppp3cc        |
| 0.786049044 | 0.964969488 | 7.23E-05 | 11 | Smox          |
| 0.475096284 | 0.965933599 | 7.23E-05 | 11 | Srgn          |
| 0.578280418 | 0.96701558  | 7.24E-05 | 11 | Stat6         |
| 0.634792629 | 0.987366477 | 7.39E-05 | 11 | Mmadhc        |
| 0.789159361 | 0.987913477 | 7.40E-05 | 11 | Gas7          |
| 0.747000521 | 0.988177664 | 7.40E-05 | 11 | Srd5a3        |
| 0.564387922 | 0.994360615 | 7.45E-05 | 11 | Cyr61         |
| 0.557187599 | 0.998579944 | 7.48E-05 | 11 | Nrbp1         |
| 0.369004109 | 1           | 7.50E-05 | 11 | Acap1         |
| 0.731029077 | 1           | 7.64E-05 | 11 | Slc35b1       |
| 0.460330096 | 1           | 7.70E-05 | 11 | Brd9          |
| 0.945199394 | 1           | 7.76E-05 | 11 | Rras          |
| 0.759423041 | 1           | 7.78E-05 | 11 | Ppp3r1        |
| 0.633848785 | 1           | 7.86E-05 | 11 | Ms4a6d        |
| 0.668616351 | 1           | 7.95E-05 | 11 | Tep1          |
| 0.645727781 | 1           | 8.01E-05 | 11 | Map2k3        |
| 0.639750836 | 1           | 8.07E-05 | 11 | Commdd9       |
| 0.714280366 | 1           | 8.14E-05 | 11 | Ston2         |
| 0.535267011 | 1           | 8.18E-05 | 11 | Tnf           |
| 0.846978932 | 1           | 8.23E-05 | 11 | Acadl         |
| 0.667568585 | 1           | 8.57E-05 | 11 | Ncf4          |
| 0.635748162 | 1           | 8.63E-05 | 11 | Fam173a       |
| 0.787391386 | 1           | 8.64E-05 | 11 | Larp4b        |
| 0.357534103 | 1           | 8.64E-05 | 11 | Endog         |
| 0.684832778 | 1           | 8.73E-05 | 11 | Ndufv2        |
| 0.690481384 | 1           | 9.02E-05 | 11 | 2810025M15Rik |
| 1.091393024 | 1           | 9.03E-05 | 11 | Klf7          |
| 0.551151413 | 1           | 9.21E-05 | 11 | Nr2c2ap       |
| 0.77744273  | 1           | 9.29E-05 | 11 | Elmod3        |
| 0.638330168 | 1           | 9.30E-05 | 11 | Ctnna1        |
| 0.518151388 | 1           | 9.30E-05 | 11 | Lrrc47        |
| 0.855891992 | 1           | 9.37E-05 | 11 | Rit1          |
| 0.68789209  | 1           | 9.39E-05 | 11 | Vopp1         |

|              |   |           |    |               |
|--------------|---|-----------|----|---------------|
| 0.531436411  | 1 | 9.51E-05  | 11 | Trim11        |
| 0.669626016  | 1 | 9.57E-05  | 11 | Esd           |
| 0.649943561  | 1 | 9.71E-05  | 11 | Ndufs6        |
| 0.479791178  | 1 | 9.71E-05  | 11 | Pitpna        |
| 0.651040338  | 1 | 9.95E-05  | 11 | Ppp1r12c      |
| -0.810885574 | 1 | 9.97E-05  | 11 | Cfl1          |
| 0.71798447   | 1 | 0.0001015 | 11 | Galnt6        |
| 0.777970964  | 1 | 0.0001015 | 11 | Pstpip1       |
| 0.738925617  | 1 | 0.0001029 | 11 | Cast          |
| 0.651587126  | 1 | 0.0001038 | 11 | Ik            |
| 0.757255607  | 1 | 0.0001042 | 11 | Nrp2          |
| 0.823375264  | 1 | 0.0001047 | 11 | Adam8         |
| 0.914299096  | 1 | 0.0001057 | 11 | Prdx4         |
| 0.662436403  | 1 | 0.0001063 | 11 | Rps19bp1      |
| 0.717425729  | 1 | 0.0001065 | 11 | Casp4         |
| 0.691465704  | 1 | 0.0001068 | 11 | Adrbk1        |
| 0.407512422  | 1 | 0.0001074 | 11 | Psme4         |
| 0.519278107  | 1 | 0.0001075 | 11 | Al504432      |
| 0.821080577  | 1 | 0.0001078 | 11 | Sec24b        |
| 0.815646263  | 1 | 0.0001096 | 11 | 0610009L18Rik |
| 0.961150077  | 1 | 0.0001105 | 11 | Fbxo32        |
| 0.768993536  | 1 | 0.000111  | 11 | Cyhr1         |
| 0.826591583  | 1 | 0.0001149 | 11 | Rwdd4a        |
| 0.536208908  | 1 | 0.0001169 | 11 | Prkx          |
| 0.513926401  | 1 | 0.0001178 | 11 | 4930526I15Rik |
| 0.454838419  | 1 | 0.0001188 | 11 | Vps37b        |
| 0.61697491   | 1 | 0.0001194 | 11 | Arhgef2       |
| 0.788384768  | 1 | 0.0001205 | 11 | Ascc1         |
| 0.573231786  | 1 | 0.0001205 | 11 | Tlr7          |
| 0.639010179  | 1 | 0.0001211 | 11 | Ubxn4         |
| 0.437765493  | 1 | 0.0001213 | 11 | Ccl5          |
| 0.698218116  | 1 | 0.0001217 | 11 | Ap1g2         |
| 0.705601335  | 1 | 0.0001218 | 11 | Ints1         |
| 0.690833063  | 1 | 0.0001233 | 11 | Dgat1         |
| 0.493172682  | 1 | 0.0001237 | 11 | Frrs1         |
| 0.271747211  | 1 | 0.0001244 | 11 | Dtx4          |
| 0.51100285   | 1 | 0.0001254 | 11 | Spast         |
| 0.633203171  | 1 | 0.0001263 | 11 | Cd52          |
| 0.536984273  | 1 | 0.0001267 | 11 | Ola1          |
| 0.768152291  | 1 | 0.0001318 | 11 | Myf2          |
| 0.300463103  | 1 | 0.0001324 | 11 | Zranb2        |
| 0.427109143  | 1 | 0.0001327 | 11 | Adamts10      |
| 0.318077862  | 1 | 0.0001329 | 11 | Fundc1        |
| 0.475807302  | 1 | 0.0001337 | 11 | Mettl2        |
| 0.669116085  | 1 | 0.0001339 | 11 | Cisd3         |
| 0.537657684  | 1 | 0.0001348 | 11 | Ankrd28       |
| 0.663101111  | 1 | 0.0001352 | 11 | Hpcal1        |
| 0.579818495  | 1 | 0.0001361 | 11 | Pim1          |
| 0.800362944  | 1 | 0.0001365 | 11 | Pusl1         |
| 0.660317579  | 1 | 0.0001371 | 11 | Tbcd          |
| 0.375024083  | 1 | 0.000139  | 11 | Tmem87a       |
| 0.350171561  | 1 | 0.0001395 | 11 | Ap2b1         |
| 0.360850961  | 1 | 0.0001396 | 11 | Fam168a       |
| 0.527044085  | 1 | 0.0001432 | 11 | Spns1         |
| 0.705318828  | 1 | 0.0001434 | 11 | Wbp2          |
| 0.476717459  | 1 | 0.000145  | 11 | Ccnd2         |
| 0.800453235  | 1 | 0.0001467 | 11 | Btaf1         |
| 0.630353754  | 1 | 0.0001497 | 11 | Ppm1g         |
| 0.473781752  | 1 | 0.0001504 | 11 | Arih2         |
| 0.41000334   | 1 | 0.0001511 | 11 | Hars2         |
| 0.542740595  | 1 | 0.0001512 | 11 | Stat4         |

|              |   |           |    |         |
|--------------|---|-----------|----|---------|
| 0.540453772  | 1 | 0.0001512 | 11 | Senp3   |
| 0.589669636  | 1 | 0.0001517 | 11 | Mapkap1 |
| 0.528811535  | 1 | 0.0001525 | 11 | Lsp1    |
| 0.589990048  | 1 | 0.0001531 | 11 | Sars    |
| 0.406618448  | 1 | 0.0001546 | 11 | Lpcat3  |
| 0.493782252  | 1 | 0.0001557 | 11 | Strap   |
| 0.983315376  | 1 | 0.0001564 | 11 | Camk2g  |
| 0.574814083  | 1 | 0.0001579 | 11 | Baz2b   |
| 0.377247869  | 1 | 0.0001588 | 11 | Dok2    |
| 0.453801655  | 1 | 0.0001622 | 11 | Uri1    |
| 0.634220755  | 1 | 0.0001624 | 11 | Lpp     |
| 0.403326877  | 1 | 0.0001633 | 11 | Anapc15 |
| 0.6707523    | 1 | 0.0001639 | 11 | Senp1   |
| 0.601584772  | 1 | 0.0001651 | 11 | Tspan13 |
| 0.346267847  | 1 | 0.0001653 | 11 | Mycbp   |
| 0.965282937  | 1 | 0.0001654 | 11 | Ccdc124 |
| 0.525547327  | 1 | 0.0001658 | 11 | Psmc14  |
| 0.495262946  | 1 | 0.0001662 | 11 | Zc3hav1 |
| 0.540775252  | 1 | 0.0001669 | 11 | Sdhc    |
| 0.288973191  | 1 | 0.0001673 | 11 | Slc7a11 |
| 0.619600056  | 1 | 0.0001688 | 11 | Cd44    |
| 0.629406426  | 1 | 0.0001693 | 11 | Smndc1  |
| 0.842804586  | 1 | 0.0001701 | 11 | Pigq    |
| 0.789718968  | 1 | 0.0001708 | 11 | Srrm1   |
| -1.20900205  | 1 | 0.0001718 | 11 | Chchd2  |
| 0.411519468  | 1 | 0.0001746 | 11 | Fryl    |
| 0.568113704  | 1 | 0.0001752 | 11 | Cyth4   |
| 0.378002473  | 1 | 0.0001775 | 11 | Pgs1    |
| 0.364108944  | 1 | 0.000183  | 11 | Cln5    |
| 0.44227631   | 1 | 0.0001893 | 11 | Snhg6   |
| 0.560620619  | 1 | 0.0001901 | 11 | Ptk2b   |
| 0.922165847  | 1 | 0.0001917 | 11 | Prkaa1  |
| 0.355268672  | 1 | 0.0001969 | 11 | Uck1    |
| 0.621525754  | 1 | 0.0002019 | 11 | Igf1    |
| 0.412678274  | 1 | 0.0002026 | 11 | Smchd1  |
| 0.671512035  | 1 | 0.0002055 | 11 | Snx1    |
| 0.505303562  | 1 | 0.0002057 | 11 | Abhd16a |
| 0.509567287  | 1 | 0.000206  | 11 | Rrp15   |
| 0.522940758  | 1 | 0.0002077 | 11 | Rnf149  |
| 0.499563901  | 1 | 0.0002084 | 11 | Nmi     |
| 0.855384697  | 1 | 0.0002103 | 11 | Tpd52l2 |
| 0.679213255  | 1 | 0.0002105 | 11 | Txnrd1  |
| 0.577326239  | 1 | 0.0002117 | 11 | Eps8    |
| 0.880704567  | 1 | 0.0002135 | 11 | Dennd4a |
| 0.622456462  | 1 | 0.000216  | 11 | Sec61a1 |
| 0.870605575  | 1 | 0.0002164 | 11 | Mitf    |
| 0.695482441  | 1 | 0.0002164 | 11 | Rdh11   |
| -1.767361371 | 1 | 0.0002177 | 11 | Aif1    |
| -2.029699968 | 1 | 0.0002261 | 11 | Skp1a   |
| -0.485893261 | 1 | 0.0002268 | 11 | Tmsb4x  |
| 0.494957288  | 1 | 0.0002268 | 11 | Por     |
| 0.610815667  | 1 | 0.000227  | 11 | Vcpip1  |
| 0.326069189  | 1 | 0.0002273 | 11 | Trappc5 |
| 0.690772256  | 1 | 0.00023   | 11 | Mgea5   |
| 0.391112855  | 1 | 0.0002321 | 11 | Tbxas1  |
| 0.376786309  | 1 | 0.0002346 | 11 | Smurf1  |
| 0.384098241  | 1 | 0.0002372 | 11 | Selt    |
| 0.756741317  | 1 | 0.0002391 | 11 | Ebi3    |
| 0.5430268    | 1 | 0.0002512 | 11 | Itfg3   |
| 0.865808196  | 1 | 0.0002513 | 11 | Mettl6  |
| 0.667746689  | 1 | 0.0002517 | 11 | Lats1   |

|              |   |           |    |               |
|--------------|---|-----------|----|---------------|
| 0.402142156  | 1 | 0.0002547 | 11 | Pitpnm1       |
| 0.276264251  | 1 | 0.0002553 | 11 | Rab3ip        |
| 0.581015383  | 1 | 0.0002558 | 11 | Ddx47         |
| 0.349019819  | 1 | 0.0002558 | 11 | Cab39l        |
| 1.067830964  | 1 | 0.0002561 | 11 | Mettl23       |
| 0.419619839  | 1 | 0.0002571 | 11 | 2410089E03Rik |
| 0.549737167  | 1 | 0.0002584 | 11 | Maea          |
| 0.321675289  | 1 | 0.0002618 | 11 | Snrpd3        |
| 0.427292511  | 1 | 0.0002622 | 11 | Rbm43         |
| 0.423932793  | 1 | 0.0002642 | 11 | Tubgcp2       |
| 0.50581035   | 1 | 0.0002652 | 11 | Atp6v0e       |
| 0.505734935  | 1 | 0.0002751 | 11 | Marveld1      |
| 0.777763863  | 1 | 0.0002757 | 11 | Vamp5         |
| 0.528704879  | 1 | 0.0002761 | 11 | Ist1          |
| 0.351901665  | 1 | 0.0002786 | 11 | Mrpl2         |
| 0.551847     | 1 | 0.0002823 | 11 | Gba           |
| 0.499497909  | 1 | 0.0002827 | 11 | Ppm1b         |
| 2.554647953  | 1 | 0.0002834 | 11 | Apoe          |
| 0.604763748  | 1 | 0.0002853 | 11 | Gadd45gip1    |
| -1.123034757 | 1 | 0.0002867 | 11 | Arpc4         |
| 0.544611339  | 1 | 0.0002931 | 11 | Cep97         |
| 0.706655947  | 1 | 0.0002957 | 11 | Myo9a         |
| -1.150740251 | 1 | 0.0002979 | 11 | Rps18         |
| 0.752769064  | 1 | 0.000299  | 11 | Srgap3        |
| 0.832825185  | 1 | 0.000301  | 11 | Zbtb21        |
| 0.982343506  | 1 | 0.0003019 | 11 | Alg3          |
| 0.590486787  | 1 | 0.0003055 | 11 | Pcif1         |
| 0.398747774  | 1 | 0.0003068 | 11 | Rtf1          |
| 0.496721018  | 1 | 0.000307  | 11 | Phkb          |
| 0.65602295   | 1 | 0.0003102 | 11 | Tcp1          |
| 0.38327532   | 1 | 0.0003151 | 11 | Top2b         |
| 0.680986292  | 1 | 0.0003207 | 11 | Coa3          |
| -1.013292524 | 1 | 0.0003225 | 11 | Psap          |
| 0.751751702  | 1 | 0.0003314 | 11 | Slc37a2       |
| -1.019719746 | 1 | 0.0003375 | 11 | Shfm1         |
| 0.383709772  | 1 | 0.0003423 | 11 | Rapgef6       |
| 0.591045558  | 1 | 0.0003425 | 11 | Cd40          |
| 0.575983039  | 1 | 0.0003517 | 11 | 1700025G04Rik |
| 0.739877421  | 1 | 0.0003543 | 11 | Vezf1         |
| 0.460531768  | 1 | 0.0003587 | 11 | Cxcl16        |
| 0.639327436  | 1 | 0.0003644 | 11 | Tmx3          |
| 0.64488879   | 1 | 0.0003696 | 11 | Mob3b         |
| 0.405263668  | 1 | 0.0003741 | 11 | Mb21d1        |
| 0.416393404  | 1 | 0.0003748 | 11 | Lmnbl         |
| 1.075691425  | 1 | 0.0003774 | 11 | Mob1b         |
| 0.47142838   | 1 | 0.0003777 | 11 | Glml          |
| 0.576236402  | 1 | 0.0003786 | 11 | Col27a1       |
| 0.689791573  | 1 | 0.0003786 | 11 | Paip2         |
| 0.409036408  | 1 | 0.0003901 | 11 | Polb          |
| 0.676921     | 1 | 0.0003941 | 11 | Rhoc          |
| 0.718425481  | 1 | 0.000396  | 11 | Alad          |
| 0.765334943  | 1 | 0.0003966 | 11 | Pip5k1c       |
| 0.907618813  | 1 | 0.0003988 | 11 | Ubap2         |
| 0.411805995  | 1 | 0.0004004 | 11 | Suclg2        |
| 0.586376177  | 1 | 0.0004021 | 11 | Grap2         |
| 0.324705922  | 1 | 0.0004039 | 11 | Cd24a         |
| 0.462567233  | 1 | 0.0004041 | 11 | Snx12         |
| -0.761235114 | 1 | 0.0004056 | 11 | H2-K1         |
| 0.884919601  | 1 | 0.0004117 | 11 | Polr3k        |
| 0.411817319  | 1 | 0.000414  | 11 | Nfat5         |
| 0.521514473  | 1 | 0.0004186 | 11 | Capg          |

|              |   |           |    |               |
|--------------|---|-----------|----|---------------|
| 0.622708966  | 1 | 0.0004239 | 11 | Spp1          |
| 0.694597851  | 1 | 0.0004245 | 11 | Zfp281        |
| 0.310455418  | 1 | 0.0004303 | 11 | Fads1         |
| 0.573546999  | 1 | 0.000431  | 11 | Hspa9         |
| 0.590425403  | 1 | 0.0004327 | 11 | Antxr2        |
| 0.536738799  | 1 | 0.0004365 | 11 | Jak1          |
| 0.491346198  | 1 | 0.0004374 | 11 | Tma16         |
| 0.50464982   | 1 | 0.0004404 | 11 | Papola        |
| 0.493530341  | 1 | 0.000443  | 11 | Bsg           |
| 0.40894804   | 1 | 0.0004438 | 11 | 2510039O18Rik |
| 0.533556885  | 1 | 0.0004475 | 11 | Rgs10         |
| 0.471037949  | 1 | 0.0004499 | 11 | Aldoa         |
| 0.405890504  | 1 | 0.0004523 | 11 | AA467197      |
| 0.394260939  | 1 | 0.0004532 | 11 | Aarsd1        |
| 0.476039079  | 1 | 0.0004533 | 11 | Scd2          |
| 0.289477513  | 1 | 0.0004551 | 11 | Setd3         |
| 0.50681454   | 1 | 0.0004593 | 11 | Alg5          |
| -0.347881592 | 1 | 0.000461  | 11 | Fth1          |
| 0.638326666  | 1 | 0.0004655 | 11 | Snapin        |
| -1.736057292 | 1 | 0.0004671 | 11 | Zfand6        |
| 0.695502051  | 1 | 0.0004674 | 11 | Tnfrsf1a      |
| 1.066746658  | 1 | 0.0004689 | 11 | Uvrag         |
| 0.46062127   | 1 | 0.0004713 | 11 | Rab4b         |
| 0.441513824  | 1 | 0.0004794 | 11 | Stt3b         |
| 0.679805515  | 1 | 0.0004866 | 11 | Mrps16        |
| 0.648896811  | 1 | 0.0004946 | 11 | Tmem60        |
| 0.605416314  | 1 | 0.000497  | 11 | Mrps18a       |
| 0.795398689  | 1 | 0.0004994 | 11 | Tmem159       |
| 1.119350877  | 1 | 0.0005094 | 11 | Runx3         |
| 0.274059178  | 1 | 0.000516  | 11 | Sla           |
| 0.509128435  | 1 | 0.0005235 | 11 | Pitpnb        |
| 0.285133489  | 1 | 0.0005278 | 11 | Dpp4          |
| -1.441692036 | 1 | 0.0005282 | 11 | Ier5          |
| -1.687213791 | 1 | 0.0005344 | 11 | Aes           |
| 0.750422301  | 1 | 0.0005347 | 11 | Polr3b        |
| 0.486992905  | 1 | 0.0005375 | 11 | Psmb1         |
| 0.727586886  | 1 | 0.0005428 | 11 | Yif1a         |
| 0.466609782  | 1 | 0.0005452 | 11 | Ecm1          |
| 0.558320774  | 1 | 0.000547  | 11 | Mrps18c       |
| 0.554029506  | 1 | 0.0005472 | 11 | Myo1g         |
| 0.301751882  | 1 | 0.0005533 | 11 | Cpne8         |
| 0.936248234  | 1 | 0.0005538 | 11 | Bola3         |
| 0.368092901  | 1 | 0.0005587 | 11 | Sbds          |
| 0.494107223  | 1 | 0.0005613 | 11 | S100a6        |
| 0.463082122  | 1 | 0.000562  | 11 | Pcbd2         |
| 0.306622088  | 1 | 0.000565  | 11 | Flt3          |
| -1.706902314 | 1 | 0.0005679 | 11 | Cox7b         |
| -0.605840118 | 1 | 0.0005684 | 11 | Rpl8          |
| 0.556761015  | 1 | 0.0005745 | 11 | Hck           |
| 0.503586253  | 1 | 0.0005748 | 11 | Asb2          |
| -1.180899247 | 1 | 0.0005918 | 11 | Rps21         |
| 0.524642494  | 1 | 0.0005936 | 11 | Hiatl1        |
| 0.485488366  | 1 | 0.000595  | 11 | 2510009E07Rik |
| 0.573828425  | 1 | 0.000603  | 11 | Slc25a12      |
| 0.368281585  | 1 | 0.000607  | 11 | Ranbp10       |
| 0.535991017  | 1 | 0.0006097 | 11 | Katna1        |
| 0.890393822  | 1 | 0.0006098 | 11 | Gm12942       |
| 0.436909297  | 1 | 0.0006135 | 11 | Atp6v0b       |
| 0.587639455  | 1 | 0.0006154 | 11 | Tgfb1         |
| 0.501716631  | 1 | 0.0006183 | 11 | Gab2          |
| 0.5078755    | 1 | 0.0006225 | 11 | Gtf2a2        |

|              |   |           |    |               |
|--------------|---|-----------|----|---------------|
| 1.914136268  | 1 | 0.0006252 | 11 | Otub1         |
| 0.488839077  | 1 | 0.000643  | 11 | 2410006H16Rik |
| 0.393522022  | 1 | 0.0006512 | 11 | Cd14          |
| 0.466471349  | 1 | 0.0006569 | 11 | Slc3a2        |
| 0.612957263  | 1 | 0.0006587 | 11 | Il13ra1       |
| 0.258625534  | 1 | 0.0006611 | 11 | Ago3          |
| -1.292742503 | 1 | 0.0006616 | 11 | Rpl37a        |
| 0.35250462   | 1 | 0.0006644 | 11 | Ebna1bp2      |
| 0.358604963  | 1 | 0.0006645 | 11 | Ganab         |
| 0.314514133  | 1 | 0.0006723 | 11 | Rcn2          |
| 0.537420446  | 1 | 0.0006729 | 11 | Rbm5          |
| 0.299013761  | 1 | 0.0006739 | 11 | Nmrk1         |
| 0.533000912  | 1 | 0.0006752 | 11 | Mrpl20        |
| 0.566635917  | 1 | 0.0006764 | 11 | Tmem173       |
| 0.38162873   | 1 | 0.0006768 | 11 | Iqgap1        |
| 0.505902206  | 1 | 0.0006814 | 11 | Rab11a        |
| 0.589584932  | 1 | 0.000691  | 11 | Ctbp2         |
| 0.754805952  | 1 | 0.0006928 | 11 | Thumpd1       |
| 0.53093016   | 1 | 0.0006929 | 11 | Kars          |
| 0.382446592  | 1 | 0.0006951 | 11 | Slc27a4       |
| 0.30473251   | 1 | 0.0007096 | 11 | Prkrip1       |
| 0.443864001  | 1 | 0.0007097 | 11 | Cbl           |
| 0.519767768  | 1 | 0.0007158 | 11 | Fkbp2         |
| 0.328171445  | 1 | 0.0007246 | 11 | Arhgef3       |
| 0.65099957   | 1 | 0.0007288 | 11 | Tmem206       |
| 0.512874902  | 1 | 0.000732  | 11 | Eed           |
| 0.510672053  | 1 | 0.0007405 | 11 | Tfg           |
| 0.332504314  | 1 | 0.0007423 | 11 | Fyn           |
| 0.549153329  | 1 | 0.0007455 | 11 | Ghitm         |
| 0.620270315  | 1 | 0.0007471 | 11 | Coro2a        |
| -1.593857301 | 1 | 0.0007561 | 11 | Prkcd         |
| 0.587123805  | 1 | 0.0007581 | 11 | Hnrnpc        |
| 0.443181881  | 1 | 0.0007626 | 11 | Ndufa2        |
| 0.44088588   | 1 | 0.0007636 | 11 | Tmx1          |
| 0.578944751  | 1 | 0.0007707 | 11 | Ube4b         |
| 0.688559104  | 1 | 0.0007802 | 11 | Atp11b        |
| 0.51162339   | 1 | 0.0008051 | 11 | Dock11        |
| 0.711929099  | 1 | 0.0008177 | 11 | Ndufb9        |
| 0.483888834  | 1 | 0.000821  | 11 | Sdhb          |
| 0.469027022  | 1 | 0.0008228 | 11 | Dhx15         |
| -2.004650393 | 1 | 0.0008244 | 11 | Zfand2a       |
| 0.260619376  | 1 | 0.0008303 | 11 | Tpgs2         |
| 0.540185351  | 1 | 0.0008357 | 11 | Acaa2         |
| 0.655584079  | 1 | 0.0008465 | 11 | Mctp1         |
| 0.405930754  | 1 | 0.0008466 | 11 | Mrpl15        |
| 0.541428606  | 1 | 0.0008521 | 11 | Plscr3        |
| 0.455861272  | 1 | 0.0008538 | 11 | Sbf2          |
| 0.566255707  | 1 | 0.0008542 | 11 | Mthfd2        |
| 0.436424754  | 1 | 0.0008571 | 11 | Vrk1          |
| 0.261422215  | 1 | 0.0008601 | 11 | Vps41         |
| -1.618730643 | 1 | 0.0008656 | 11 | Ptpn18        |
| 0.555098952  | 1 | 0.0008705 | 11 | Med10         |
| 0.48613196   | 1 | 0.0008713 | 11 | Rnf103        |
| 0.441173314  | 1 | 0.0008722 | 11 | Cxcl2         |
| 0.377286893  | 1 | 0.0008752 | 11 | Ssna1         |
| 0.41008647   | 1 | 0.0008834 | 11 | Rab8b         |
| 0.418221632  | 1 | 0.000885  | 11 | Homer1        |
| 0.563773577  | 1 | 0.0008925 | 11 | Cd93          |
| 0.519459104  | 1 | 0.0008995 | 11 | Sod2          |
| 0.63294266   | 1 | 0.0009174 | 11 | Zdhhc3        |
| 0.526625521  | 1 | 0.0009231 | 11 | Purb          |

|              |   |           |    |               |
|--------------|---|-----------|----|---------------|
| 0.513244484  | 1 | 0.0009274 | 11 | Plec          |
| 0.377131565  | 1 | 0.0009295 | 11 | Creb1         |
| 0.477124708  | 1 | 0.0009394 | 11 | Nop16         |
| 0.490354302  | 1 | 0.0009493 | 11 | Nfkbiz        |
| 0.655846374  | 1 | 0.0009575 | 11 | 1700123O20Rik |
| 0.354676073  | 1 | 0.0009585 | 11 | Max           |
| 0.574815199  | 1 | 0.000964  | 11 | Naa15         |
| 0.491711228  | 1 | 0.0009687 | 11 | Rragc         |
| 0.84843833   | 1 | 0.0009817 | 11 | Ssbp4         |
| 0.696117065  | 1 | 0.0009828 | 11 | Nupr1         |
| 0.566676967  | 1 | 0.0009874 | 11 | Ube2g1        |
| 0.348561048  | 1 | 0.000988  | 11 | Cln4-2        |
| -2.048587643 | 1 | 0.0009945 | 11 | Cuta          |
| 0.540148734  | 1 | 0.0009946 | 11 | Mapre2        |
| 0.354973974  | 1 | 0.0009998 | 11 | Cxcl1         |
| 0.317774844  | 1 | 0.001011  | 11 | Ube3c         |
| 0.499179466  | 1 | 0.0010181 | 11 | Sco2          |
| 0.454529192  | 1 | 0.0010236 | 11 | Ubfd1         |
| -0.956379673 | 1 | 0.0010262 | 11 | Rps19         |
| 0.420469457  | 1 | 0.0010344 | 11 | Sik2          |
| 0.359869835  | 1 | 0.0010352 | 11 | Mpp6          |
| 0.356674944  | 1 | 0.0010387 | 11 | Slc9a6        |
| 0.525395308  | 1 | 0.001055  | 11 | Rars2         |
| 0.44049453   | 1 | 0.0010603 | 11 | Atp6ap2       |
| 0.530975753  | 1 | 0.0010641 | 11 | Poc1b         |
| 0.87526788   | 1 | 0.0010654 | 11 | Sh2d1b1       |
| -1.883856576 | 1 | 0.0011015 | 11 | Tpst2         |
| 0.35160409   | 1 | 0.0011066 | 11 | Sipa1l1       |
| 0.561882574  | 1 | 0.0011194 | 11 | Zdhhc20       |
| 0.383119852  | 1 | 0.0011293 | 11 | Ccdc174       |
| 0.429114554  | 1 | 0.0011343 | 11 | Dnajib11      |
| 0.546051395  | 1 | 0.0011408 | 11 | Ppp2ca        |
| -1.983964681 | 1 | 0.0011436 | 11 | Tsc22d3       |
| 0.294189109  | 1 | 0.0011464 | 11 | Zfp326        |
| -1.835982373 | 1 | 0.0011502 | 11 | Jun           |
| 0.36751691   | 1 | 0.0011561 | 11 | Akap11        |
| 0.588804772  | 1 | 0.0011638 | 11 | Eif6          |
| 0.716729128  | 1 | 0.0011724 | 11 | Icmt          |
| 0.378206797  | 1 | 0.0011726 | 11 | Thoc7         |
| -0.934064409 | 1 | 0.0011804 | 11 | Dusp1         |
| 0.618128803  | 1 | 0.0011807 | 11 | Golt1b        |
| 0.525103932  | 1 | 0.0012142 | 11 | Otud4         |
| 0.33329282   | 1 | 0.0012163 | 11 | Acsl5         |
| 0.642184519  | 1 | 0.0012187 | 11 | Slc39a11      |
| -1.961745823 | 1 | 0.0012247 | 11 | Leprotl1      |
| 0.297785937  | 1 | 0.001241  | 11 | Mul1          |
| 0.445670682  | 1 | 0.0012475 | 11 | Tes           |
| -0.761092756 | 1 | 0.001254  | 11 | Sdcbp         |
| 0.431737916  | 1 | 0.0012557 | 11 | Cnot2         |
| 0.503093763  | 1 | 0.0012638 | 11 | Erap1         |
| 0.614746376  | 1 | 0.0012646 | 11 | Gxylt1        |
| 0.45320679   | 1 | 0.0012673 | 11 | Dusp3         |
| 0.4904934    | 1 | 0.0012675 | 11 | Dctn2         |
| 0.42302265   | 1 | 0.0012804 | 11 | Spsb3         |
| 0.42899274   | 1 | 0.0012818 | 11 | Zc3h7a        |
| 0.414671443  | 1 | 0.0012874 | 11 | Frmd4a        |
| 0.273944265  | 1 | 0.0012959 | 11 | Bicd2         |
| 0.549637225  | 1 | 0.0012982 | 11 | Pik3c2a       |
| 0.379256549  | 1 | 0.0013245 | 11 | Lrrfip2       |
| 0.52729966   | 1 | 0.0013328 | 11 | Mrpl54        |
| 0.399003115  | 1 | 0.0013357 | 11 | Lsm4          |



|              |   |           |    |               |
|--------------|---|-----------|----|---------------|
| 0.577352023  | 1 | 0.0013408 | 11 | Btbd2         |
| 0.45827899   | 1 | 0.0013448 | 11 | Rnh1          |
| 0.332958417  | 1 | 0.0013538 | 11 | Aldh9a1       |
| 0.487407469  | 1 | 0.0013608 | 11 | Tmem50a       |
| 0.667335508  | 1 | 0.0013664 | 11 | Sh3pxd2a      |
| 0.404856333  | 1 | 0.001377  | 11 | Crnk1         |
| 0.528849929  | 1 | 0.0013848 | 11 | Gimap4        |
| 0.474642023  | 1 | 0.0013954 | 11 | Isoc2b        |
| 0.483268609  | 1 | 0.0013959 | 11 | Tmem70        |
| 0.313309093  | 1 | 0.0013987 | 11 | Pvr           |
| -2.014775421 | 1 | 0.0014045 | 11 | Rgl1          |
| 0.363135703  | 1 | 0.0014081 | 11 | Slirp         |
| -2.001789822 | 1 | 0.0014124 | 11 | GpnmB         |
| 0.395855061  | 1 | 0.0014137 | 11 | Smg5          |
| -1.435741032 | 1 | 0.001415  | 11 | 5430435G22Rik |
| 0.254880035  | 1 | 0.0014225 | 11 | Tbc1d9        |
| 0.410795051  | 1 | 0.0014301 | 11 | Snrpe         |
| -1.928703062 | 1 | 0.0014427 | 11 | Samhd1        |
| 0.435483655  | 1 | 0.0014488 | 11 | Rps17         |
| 0.544530564  | 1 | 0.0014686 | 11 | Ubr5          |
| 0.382595687  | 1 | 0.0014707 | 11 | Rel1          |
| -1.933686798 | 1 | 0.0014756 | 11 | Egr1          |
| 0.454607301  | 1 | 0.001481  | 11 | Usp34         |
| -1.99033499  | 1 | 0.0014825 | 11 | Slc48a1       |
| 0.458465406  | 1 | 0.0014894 | 11 | Rbl2          |
| 0.630197943  | 1 | 0.0014968 | 11 | Hypk          |
| 0.372110123  | 1 | 0.0015032 | 11 | Ctsa          |
| 0.51640384   | 1 | 0.0015059 | 11 | Bcl2a1b       |
| 0.51100285   | 1 | 0.001507  | 11 | Gm561         |
| 0.557187599  | 1 | 0.0015174 | 11 | Srp68         |
| 0.260174029  | 1 | 0.0015225 | 11 | Gfm2          |
| -2.093706667 | 1 | 0.0015333 | 11 | Tbcb          |
| 0.325532822  | 1 | 0.0015473 | 11 | Cd2bp2        |
| -1.82289711  | 1 | 0.0015537 | 11 | Pla2g7        |
| 0.523990046  | 1 | 0.0015754 | 11 | Mtmr10        |
| 0.774964315  | 1 | 0.0015903 | 11 | Tspan3        |
| 0.33085023   | 1 | 0.0015967 | 11 | Dst           |
| 0.502728703  | 1 | 0.0016105 | 11 | Dnajc3        |
| 0.434758384  | 1 | 0.0016123 | 11 | Arl8a         |
| 0.327772682  | 1 | 0.0016182 | 11 | Pum2          |
| 0.352123174  | 1 | 0.0016251 | 11 | Gins2         |
| 0.318102915  | 1 | 0.0016354 | 11 | Scarb2        |
| -1.708141109 | 1 | 0.0016578 | 11 | Eif3d         |
| 0.441035622  | 1 | 0.0016738 | 11 | Krtcap2       |
| 0.349904836  | 1 | 0.0017085 | 11 | Tmem106b      |
| 0.425909089  | 1 | 0.0017219 | 11 | Esyt2         |
| 0.496443001  | 1 | 0.001749  | 11 | Dctn3         |
| 0.580160317  | 1 | 0.0017495 | 11 | Pts           |
| -0.361815532 | 1 | 0.0017512 | 11 | Actb          |
| -1.557622275 | 1 | 0.0017718 | 11 | Ptpn1         |
| -1.064105593 | 1 | 0.0017801 | 11 | Tceb2         |
| 0.421287078  | 1 | 0.0017894 | 11 | Pik3r5        |
| 0.675128675  | 1 | 0.0017894 | 11 | Tmem185b      |
| 0.683104789  | 1 | 0.0017992 | 11 | Dnajc12       |
| 0.388044868  | 1 | 0.0018042 | 11 | Cxxc1         |
| 0.420256985  | 1 | 0.001818  | 11 | Uhrf1bp1l     |
| 0.417853172  | 1 | 0.0018215 | 11 | Peli1         |
| 0.397782679  | 1 | 0.0018319 | 11 | Fam107b       |
| 0.347515693  | 1 | 0.0018623 | 11 | Ndufaf4       |
| 0.383903901  | 1 | 0.0018694 | 11 | Ubl3          |
| 0.453589182  | 1 | 0.0018715 | 11 | Ldha          |

|              |   |           |    |               |
|--------------|---|-----------|----|---------------|
| -1.705788261 | 1 | 0.0018789 | 11 | Sash1         |
| -1.30917682  | 1 | 0.0018792 | 11 | Lyz1          |
| 0.473596512  | 1 | 0.0019076 | 11 | Set           |
| -1.899253419 | 1 | 0.0019096 | 11 | Myo9b         |
| 0.250088682  | 1 | 0.0019229 | 11 | Mbtps1        |
| 0.420745583  | 1 | 0.0019642 | 11 | Nagpa         |
| 0.693590738  | 1 | 0.0019642 | 11 | Cd180         |
| -0.420936569 | 1 | 0.001973  | 11 | Malat1        |
| 0.488194728  | 1 | 0.0019927 | 11 | Arfgef1       |
| 0.372457823  | 1 | 0.0020387 | 11 | Srgap2        |
| 0.267342573  | 1 | 0.0020666 | 11 | Hist1h2bc     |
| 0.362775748  | 1 | 0.0020753 | 11 | Zscan26       |
| 0.286969314  | 1 | 0.0020813 | 11 | Gpr183        |
| 0.442055096  | 1 | 0.0020827 | 11 | Trip10        |
| 0.335396019  | 1 | 0.0020893 | 11 | Gmip          |
| -1.080229174 | 1 | 0.0020984 | 11 | Zfp36         |
| 0.606342223  | 1 | 0.0021183 | 11 | Slc11a1       |
| -1.502066774 | 1 | 0.0021286 | 11 | Nipbl         |
| 0.340400118  | 1 | 0.002133  | 11 | Pttg1ip       |
| -1.966015031 | 1 | 0.00217   | 11 | Clec4a2       |
| 0.263657543  | 1 | 0.0021732 | 11 | Abl2          |
| -1.850599969 | 1 | 0.0021834 | 11 | Ubr2          |
| -2.01845333  | 1 | 0.0021942 | 11 | Ntpcr         |
| 0.40306753   | 1 | 0.0022109 | 11 | Atg5          |
| -1.882042359 | 1 | 0.002222  | 11 | Mycbp2        |
| -1.622635378 | 1 | 0.0022349 | 11 | Csk           |
| 0.364631152  | 1 | 0.0022742 | 11 | Fam20c        |
| 1.411465858  | 1 | 0.0022771 | 11 | Ndufs7        |
| 0.511161448  | 1 | 0.002289  | 11 | Tmbim1        |
| 0.499022439  | 1 | 0.0023062 | 11 | Psmg2         |
| 0.504093481  | 1 | 0.0023158 | 11 | Zbtb18        |
| 0.346426485  | 1 | 0.0023204 | 11 | Hnrnpul2      |
| 0.389797542  | 1 | 0.002331  | 11 | Ggnbp2        |
| 0.358346255  | 1 | 0.0023388 | 11 | Arpc2         |
| 0.308622643  | 1 | 0.0023558 | 11 | Eprs          |
| 0.551514719  | 1 | 0.0023743 | 11 | Zcrb1         |
| -1.920001051 | 1 | 0.0023906 | 11 | 1500012F01Rik |
| 0.444316254  | 1 | 0.0024034 | 11 | Zwint         |
| 0.722091071  | 1 | 0.0024166 | 11 | Tns3          |
| 0.281947592  | 1 | 0.0024257 | 11 | Smim3         |
| 0.542318523  | 1 | 0.0024448 | 11 | Mrpl17        |
| 0.519364345  | 1 | 0.0024604 | 11 | Tram1         |
| 0.288870303  | 1 | 0.0024629 | 11 | Nup88         |
| 0.411689584  | 1 | 0.0024852 | 11 | Wasl          |
| 0.683411112  | 1 | 0.0024931 | 11 | Cmc1          |
| 0.305847959  | 1 | 0.0024955 | 11 | Sun1          |
| -2.09007994  | 1 | 0.0025436 | 11 | Ppp2r5a       |
| 0.403176666  | 1 | 0.002556  | 11 | Fam96b        |
| -1.897508665 | 1 | 0.0025936 | 11 | Cadm1         |
| 0.408320857  | 1 | 0.0025961 | 11 | Msra          |
| 0.412297375  | 1 | 0.0026146 | 11 | Slc25a4       |
| 0.429013661  | 1 | 0.002622  | 11 | Zfp207        |
| -1.706073008 | 1 | 0.0026269 | 11 | Ptpro         |
| 0.668035685  | 1 | 0.0026316 | 11 | Hras          |
| 0.502676407  | 1 | 0.0026696 | 11 | Got2          |
| -1.469637692 | 1 | 0.0026811 | 11 | Yif1b         |
| 0.644818456  | 1 | 0.0026924 | 11 | Vps25         |
| 0.464655352  | 1 | 0.0027054 | 11 | Kpna4         |
| 0.358072018  | 1 | 0.0027137 | 11 | Itgb1         |
| 0.389832637  | 1 | 0.0027198 | 11 | Akap13        |
| -1.989249819 | 1 | 0.0027556 | 11 | Ly6a          |

|              |   |           |    |               |
|--------------|---|-----------|----|---------------|
| 0.360612968  | 1 | 0.0027828 | 11 | Nav1          |
| -1.67588848  | 1 | 0.0027832 | 11 | Klf3          |
| 0.460264049  | 1 | 0.0028093 | 11 | Cul3          |
| 0.293605531  | 1 | 0.0028279 | 11 | Nup214        |
| 0.255355391  | 1 | 0.0028307 | 11 | Ring1         |
| 0.272098351  | 1 | 0.0028727 | 11 | Utrn          |
| 0.3847442    | 1 | 0.0028801 | 11 | Pfkip         |
| 0.449947218  | 1 | 0.0028933 | 11 | Bcl2          |
| 0.320609162  | 1 | 0.0029005 | 11 | Plekhm1       |
| 0.408096224  | 1 | 0.0029014 | 11 | Mafg          |
| 0.447443532  | 1 | 0.0029153 | 11 | Chst11        |
| -0.665003644 | 1 | 0.0029208 | 11 | Gm4832        |
| 0.561288621  | 1 | 0.0029266 | 11 | Os9           |
| 0.573835295  | 1 | 0.002964  | 11 | Cnep1r1       |
| 0.344374277  | 1 | 0.0029651 | 11 | Hcfc1r1       |
| 0.348488693  | 1 | 0.0029707 | 11 | Tnfrsf1b      |
| 0.51237411   | 1 | 0.0029922 | 11 | Tmem179b      |
| -1.736367791 | 1 | 0.0029935 | 11 | Ndufb2        |
| -1.069062471 | 1 | 0.0030074 | 11 | Hnrnpu        |
| -1.598656498 | 1 | 0.0030119 | 11 | Hmox2         |
| 0.54957861   | 1 | 0.003019  | 11 | Ddx41         |
| 0.318395253  | 1 | 0.003022  | 11 | Furin         |
| -0.521898652 | 1 | 0.0030243 | 11 | Rps20         |
| 0.473644913  | 1 | 0.0030488 | 11 | Nptn          |
| 0.500354324  | 1 | 0.0030647 | 11 | Cep63         |
| -0.306938202 | 1 | 0.0031116 | 11 | Nkg7          |
| 0.402693832  | 1 | 0.0032121 | 11 | Tnpo1         |
| 0.547933101  | 1 | 0.003224  | 11 | Uchl5         |
| 0.308356529  | 1 | 0.0032243 | 11 | Ccnl1         |
| 0.999410276  | 1 | 0.0032368 | 11 | Zmat5         |
| 0.269113014  | 1 | 0.0032433 | 11 | Marcks1       |
| 0.492160385  | 1 | 0.0032891 | 11 | Arpc5         |
| -1.769023306 | 1 | 0.0033097 | 11 | Vaultrc5      |
| -1.676346828 | 1 | 0.003374  | 11 | Nagk          |
| 0.559855051  | 1 | 0.0033971 | 11 | Zcchc17       |
| 0.42206397   | 1 | 0.0034037 | 11 | Psma1         |
| 0.322159696  | 1 | 0.003463  | 11 | Folr2         |
| -1.76449727  | 1 | 0.0035239 | 11 | Becn1         |
| 0.349576329  | 1 | 0.003532  | 11 | Mtss1         |
| 0.450013385  | 1 | 0.0035329 | 11 | Rgl2          |
| -1.961764661 | 1 | 0.0035347 | 11 | Mdfic         |
| -1.654143902 | 1 | 0.0035403 | 11 | Cebpa         |
| 0.370096709  | 1 | 0.003555  | 11 | 1600002K03Rik |
| 0.460226466  | 1 | 0.0035851 | 11 | Dpep2         |
| 0.350828128  | 1 | 0.0035891 | 11 | Mfsd6         |
| 0.474653292  | 1 | 0.0036034 | 11 | Elovl1        |
| -0.599222998 | 1 | 0.0036274 | 11 | Pfn1          |
| 0.397364039  | 1 | 0.003639  | 11 | Zak           |
| 0.619857795  | 1 | 0.0036617 | 11 | Mpv17         |
| 0.298449213  | 1 | 0.0036647 | 11 | Rnf111        |
| -1.44579946  | 1 | 0.0036806 | 11 | Itm2c         |
| 0.59260308   | 1 | 0.0036903 | 11 | Cap1          |
| 0.492286149  | 1 | 0.0037849 | 11 | Ftsj3         |
| 0.330014104  | 1 | 0.0037975 | 11 | Pdap1         |
| 0.604980172  | 1 | 0.0038142 | 11 | Pls3          |
| -1.681586594 | 1 | 0.0038164 | 11 | Drap1         |
| -1.96146756  | 1 | 0.0038309 | 11 | Igsf6         |
| 0.40289205   | 1 | 0.0038951 | 11 | Esf1          |
| 0.329347815  | 1 | 0.0039063 | 11 | Fndc3b        |
| -0.417201548 | 1 | 0.0039103 | 11 | Hspa8         |
| 0.296932595  | 1 | 0.0039194 | 11 | Cops2         |

|              |   |           |    |               |
|--------------|---|-----------|----|---------------|
| 0.485498414  | 1 | 0.0039588 | 11 | Cox6a1        |
| -0.360976075 | 1 | 0.00397   | 11 | B2m           |
| -1.72088513  | 1 | 0.003988  | 11 | Arl2          |
| 0.357363753  | 1 | 0.0040128 | 11 | Banf1         |
| 0.318795292  | 1 | 0.0040197 | 11 | Pxn           |
| -0.947592937 | 1 | 0.0040318 | 11 | Myh9          |
| 0.328967649  | 1 | 0.0040345 | 11 | Nt5e          |
| -1.701349544 | 1 | 0.004108  | 11 | Nek9          |
| 0.26893284   | 1 | 0.0041196 | 11 | Mars          |
| -1.068943871 | 1 | 0.0041303 | 11 | Ctsc          |
| 0.355257563  | 1 | 0.0041636 | 11 | Pgd           |
| 0.310279487  | 1 | 0.0041847 | 11 | Bud31         |
| -1.504008051 | 1 | 0.0042024 | 11 | Snrpd1        |
| 0.294480612  | 1 | 0.0042153 | 11 | Dgkd          |
| -1.921975964 | 1 | 0.0042243 | 11 | Irf7          |
| -1.805696977 | 1 | 0.0042559 | 11 | Sf3b3         |
| -1.643677525 | 1 | 0.004263  | 11 | Mrpl18        |
| 0.414000335  | 1 | 0.0042631 | 11 | Ptpa          |
| 0.420894537  | 1 | 0.0042844 | 11 | Mrps28        |
| 0.307587938  | 1 | 0.0043009 | 11 | Mrpl40        |
| 0.274688703  | 1 | 0.0043021 | 11 | Mrpl55        |
| 0.428266825  | 1 | 0.004308  | 11 | Spag9         |
| 0.382772169  | 1 | 0.0043169 | 11 | 2310036O22Rik |
| 0.437423839  | 1 | 0.0043285 | 11 | Rnf215        |
| -1.628848637 | 1 | 0.004355  | 11 | Ptges3        |
| 0.266511858  | 1 | 0.004357  | 11 | Psmb10        |
| -1.641826358 | 1 | 0.0043905 | 11 | Tmem126a      |
| 0.300750225  | 1 | 0.0044235 | 11 | Rnf34         |
| 0.485073438  | 1 | 0.0044411 | 11 | Crybg3        |
| 0.400229751  | 1 | 0.004446  | 11 | Nckap1l       |
| -2.100304202 | 1 | 0.0045061 | 11 | Hspa1b        |
| 0.394375188  | 1 | 0.0045109 | 11 | Tapbp         |
| -0.572019456 | 1 | 0.0046276 | 11 | Mir682        |
| -1.699077412 | 1 | 0.0046764 | 11 | Arhgef7       |
| 0.318264275  | 1 | 0.0046774 | 11 | Rps6ka3       |
| 0.34516399   | 1 | 0.0046832 | 11 | Exoc5         |
| -0.649920245 | 1 | 0.0047155 | 11 | Capzb         |
| 0.497742298  | 1 | 0.004756  | 11 | Sar1a         |
| 0.391680565  | 1 | 0.0047567 | 11 | Ssb           |
| 0.443087388  | 1 | 0.0048086 | 11 | Rgs19         |
| -1.791599967 | 1 | 0.0048127 | 11 | C3            |
| 0.38269385   | 1 | 0.0048766 | 11 | Mrpl38        |
| -1.687501625 | 1 | 0.0048985 | 11 | Tsn           |
| -1.629521952 | 1 | 0.004899  | 11 | Cant1         |
| -1.918516238 | 1 | 0.0049079 | 11 | Fcgr4         |
| 0.526830572  | 1 | 0.0049283 | 11 | Sms           |
| 0.706941849  | 1 | 0.0049764 | 11 | Sfxn2         |
| -1.39785614  | 1 | 0.0049953 | 11 | Zc3h13        |
| 0.521085142  | 1 | 0.0050519 | 11 | Tagln2        |
| 0.410742165  | 1 | 0.0050545 | 11 | Srp72         |
| 0.644690888  | 1 | 0.0050913 | 11 | Gng5          |
| -0.590254467 | 1 | 0.005105  | 11 | Tpm3          |
| -1.629521952 | 1 | 0.0051307 | 11 | Nin           |
| -1.664179799 | 1 | 0.0051358 | 11 | Vipas39       |
| 0.279457965  | 1 | 0.005144  | 11 | Gypc          |
| 0.587824943  | 1 | 0.0052844 | 11 | Srpr          |
| -1.892628253 | 1 | 0.0053124 | 11 | Cpt1a         |
| 0.399484505  | 1 | 0.0053212 | 11 | Rnf7          |
| 0.258801431  | 1 | 0.0053777 | 11 | Trappc4       |
| 0.912745597  | 1 | 0.0054322 | 11 | Uqcrq         |
| 0.653650466  | 1 | 0.0054331 | 11 | Slc25a13      |

|              |   |           |    |               |
|--------------|---|-----------|----|---------------|
| -1.900781535 | 1 | 0.0054401 | 11 | Nenf          |
| -1.949877242 | 1 | 0.0054402 | 11 | Ms4a6b        |
| 0.815770726  | 1 | 0.0054522 | 11 | Stx4a         |
| 0.301786063  | 1 | 0.0054566 | 11 | Cr1l          |
| 0.316566967  | 1 | 0.0055198 | 11 | Gaa           |
| -1.553753222 | 1 | 0.0055239 | 11 | Pdha1         |
| 0.356773148  | 1 | 0.0055346 | 11 | Lcp1          |
| 0.508716297  | 1 | 0.0055411 | 11 | Trappc6a      |
| 0.591574518  | 1 | 0.0055568 | 11 | Mrpl11        |
| -1.83535274  | 1 | 0.0055628 | 11 | Sec31a        |
| 0.45795255   | 1 | 0.0055875 | 11 | Ppapdc1b      |
| -1.797125165 | 1 | 0.0056081 | 11 | Gpx3          |
| 0.647517865  | 1 | 0.0056081 | 11 | 2810002D19Rik |
| 0.374146705  | 1 | 0.0056343 | 11 | Vps29         |
| -1.550104323 | 1 | 0.0056427 | 11 | Eny2          |
| 0.329331392  | 1 | 0.0056492 | 11 | Padi2         |
| 0.281905713  | 1 | 0.0056563 | 11 | Arhgap26      |
| 0.333384588  | 1 | 0.0056649 | 11 | Trappc2l      |
| -1.764271886 | 1 | 0.0057201 | 11 | Preb          |
| -1.307006452 | 1 | 0.0057504 | 11 | Rpl38         |
| 0.426110195  | 1 | 0.005758  | 11 | Trove2        |
| -1.718602817 | 1 | 0.0057715 | 11 | Abr           |
| 0.333636317  | 1 | 0.0057762 | 11 | Csnk2a1       |
| 0.425155302  | 1 | 0.0057974 | 11 | Sdc1          |
| -1.622746094 | 1 | 0.0058235 | 11 | Ergic1        |
| 0.791674685  | 1 | 0.0058387 | 11 | Ssfa2         |
| -1.798869198 | 1 | 0.0058755 | 11 | Dnajc13       |
| 0.312566     | 1 | 0.0058919 | 11 | Lamp2         |
| 1.365815279  | 1 | 0.005907  | 11 | Wdr26         |
| 0.375166726  | 1 | 0.0059524 | 11 | Lamtor5       |
| 0.267548443  | 1 | 0.0059529 | 11 | Nfkbia        |
| 0.322673147  | 1 | 0.0059761 | 11 | Rbx1          |
| 0.419467445  | 1 | 0.006006  | 11 | Sgpl1         |
| 0.399579519  | 1 | 0.0060087 | 11 | Rtn4          |
| 0.519704434  | 1 | 0.0060279 | 11 | Slc12a4       |
| -0.909968196 | 1 | 0.0060341 | 11 | Mir703        |
| -1.819489437 | 1 | 0.0060633 | 11 | Ifi203        |
| -1.730257269 | 1 | 0.0060782 | 11 | Acadvl        |
| -1.613639599 | 1 | 0.00608   | 11 | Zfp62         |
| 0.293407469  | 1 | 0.0061108 | 11 | H2-DMb1       |
| 0.34117417   | 1 | 0.0061187 | 11 | Rasa1         |
| -1.685149644 | 1 | 0.006168  | 11 | Btg2          |
| 0.412790035  | 1 | 0.006188  | 11 | Ndufa9        |
| -1.641641053 | 1 | 0.00619   | 11 | Slc16a10      |
| -1.650521691 | 1 | 0.0062006 | 11 | H2-K2         |
| -1.785640307 | 1 | 0.0062102 | 11 | Gtf3c2        |
| 0.271918359  | 1 | 0.0062155 | 11 | Vdac1         |
| 0.375276804  | 1 | 0.0062158 | 11 | Lims1         |
| -1.809485534 | 1 | 0.0062663 | 11 | Phactr2       |
| -1.70639962  | 1 | 0.0062691 | 11 | Adrbk2        |
| -1.709867631 | 1 | 0.0062711 | 11 | Sppl3         |
| -1.534477614 | 1 | 0.0062726 | 11 | Commdd6       |
| -1.604904863 | 1 | 0.0062748 | 11 | Calm3         |
| -1.793721783 | 1 | 0.0062838 | 11 | Xpo1          |
| -1.754745782 | 1 | 0.0062943 | 11 | Rsrc2         |
| -1.385277097 | 1 | 0.006322  | 11 | Irf2bp2       |
| 0.656945074  | 1 | 0.0063719 | 11 | Tmem43        |
| -1.572977589 | 1 | 0.0063805 | 11 | Emc1          |
| 0.431111233  | 1 | 0.006426  | 11 | Zc3h11a       |
| 0.392148984  | 1 | 0.006431  | 11 | Sqstm1        |
| 0.413416935  | 1 | 0.006484  | 11 | P4hb          |

|              |   |           |    |               |
|--------------|---|-----------|----|---------------|
| 0.385842006  | 1 | 0.0065075 | 11 | Fes           |
| -1.6799611   | 1 | 0.0065294 | 11 | Luc7l3        |
| 0.328692273  | 1 | 0.0065385 | 11 | Ifi30         |
| -1.672300389 | 1 | 0.0065861 | 11 | Gas2l1        |
| -1.517910044 | 1 | 0.0065872 | 11 | Cdc5l         |
| -1.866216739 | 1 | 0.0065912 | 11 | Msrbl1        |
| 0.615429253  | 1 | 0.0066123 | 11 | Ccdc6         |
| 0.377403477  | 1 | 0.006614  | 11 | Rnf11         |
| -1.098750826 | 1 | 0.0066324 | 11 | Ehd4          |
| 0.256002914  | 1 | 0.0066857 | 11 | Sidt2         |
| 0.362048206  | 1 | 0.0066916 | 11 | Rac2          |
| -1.64275237  | 1 | 0.0067625 | 11 | Mfsd10        |
| 0.270137838  | 1 | 0.0067625 | 11 | Tmem126b      |
| -1.614067037 | 1 | 0.0068656 | 11 | Ccdc88a       |
| -1.759176961 | 1 | 0.0068842 | 11 | Ccdc88b       |
| -1.646816665 | 1 | 0.0068852 | 11 | Acdb5         |
| -1.521051079 | 1 | 0.00689   | 11 | Sh3bp2        |
| -0.653122316 | 1 | 0.0069039 | 11 | Gm6654        |
| -1.766237166 | 1 | 0.0069774 | 11 | Ict1          |
| 0.312275587  | 1 | 0.0070016 | 11 | Prdx6         |
| -1.740550113 | 1 | 0.0070132 | 11 | Ythdf3        |
| 0.310224891  | 1 | 0.0070177 | 11 | Al314180      |
| -1.054595403 | 1 | 0.0070707 | 11 | Rps25         |
| -1.76607354  | 1 | 0.0070845 | 11 | Slmap         |
| 0.313680452  | 1 | 0.0071054 | 11 | Plaur         |
| -1.808955268 | 1 | 0.0071771 | 11 | Rnf216        |
| 0.606439493  | 1 | 0.0071972 | 11 | Psd4          |
| -1.587964991 | 1 | 0.0071977 | 11 | Nkiras2       |
| -1.621044931 | 1 | 0.0072125 | 11 | Srsf1         |
| -1.526264312 | 1 | 0.0072857 | 11 | Slc1a5        |
| -1.558799151 | 1 | 0.0073042 | 11 | Slc35e4       |
| 0.256572906  | 1 | 0.0073393 | 11 | Ddx24         |
| -1.530001082 | 1 | 0.0074215 | 11 | Mid1ip1       |
| -1.441775492 | 1 | 0.0074298 | 11 | Cuedc2        |
| -1.391336421 | 1 | 0.0074777 | 11 | Myo5a         |
| 0.389448605  | 1 | 0.0074794 | 11 | Nceh1         |
| -1.451356071 | 1 | 0.0075388 | 11 | Ppfia1        |
| -1.232099172 | 1 | 0.0075414 | 11 | Atp1a1        |
| 0.491483929  | 1 | 0.0075573 | 11 | BC005561      |
| -1.924958537 | 1 | 0.007579  | 11 | Vkorc1        |
| -1.448418936 | 1 | 0.0075943 | 11 | Atp13a3       |
| -1.461161354 | 1 | 0.0076064 | 11 | Ascc3         |
| 0.456651867  | 1 | 0.0076091 | 11 | Gtf2f2        |
| 0.257814296  | 1 | 0.0076597 | 11 | Trim30a       |
| -1.597694588 | 1 | 0.0077511 | 11 | Cwc25         |
| 0.304083791  | 1 | 0.0077769 | 11 | Mrpl46        |
| 0.274250731  | 1 | 0.007857  | 11 | Cisd2         |
| 0.380399126  | 1 | 0.0078743 | 11 | Mllt11        |
| -1.59011364  | 1 | 0.0078825 | 11 | Kif1c         |
| -1.772998723 | 1 | 0.0079738 | 11 | Tmem261       |
| -1.651035874 | 1 | 0.007983  | 11 | Map2k4        |
| 0.30603904   | 1 | 0.0079906 | 11 | 2810004N23Rik |
| -1.584046491 | 1 | 0.0079908 | 11 | Mical1        |
| -1.537638646 | 1 | 0.0080095 | 11 | Pdcl3         |
| 0.281841319  | 1 | 0.0080108 | 11 | Pik3cb        |
| -1.082986878 | 1 | 0.008012  | 11 | Sdc3          |
| 0.350872594  | 1 | 0.0080262 | 11 | Abhd17b       |
| 0.306283634  | 1 | 0.0080276 | 11 | Mrpl13        |
| 0.339480626  | 1 | 0.0080351 | 11 | Tpm4          |
| -1.3609116   | 1 | 0.0080611 | 11 | Klf13         |
| -1.779241251 | 1 | 0.0080709 | 11 | Hmgn1         |

|              |   |           |    |           |
|--------------|---|-----------|----|-----------|
| -1.567818152 | 1 | 0.0081112 | 11 | Tmem87b   |
| 0.311216823  | 1 | 0.0081143 | 11 | Ppt1      |
| 0.283798078  | 1 | 0.0081412 | 11 | Nip7      |
| 0.328134696  | 1 | 0.0081464 | 11 | Chfr      |
| 0.391236671  | 1 | 0.0083203 | 11 | Dph6      |
| 0.340167338  | 1 | 0.0083256 | 11 | Atp6v0d1  |
| 0.401143059  | 1 | 0.0083407 | 11 | Stk10     |
| 0.35009498   | 1 | 0.0083862 | 11 | Zfx       |
| 0.38435541   | 1 | 0.0084543 | 11 | Derl2     |
| -1.670045272 | 1 | 0.0084583 | 11 | Tnfrsf11a |
| 0.451039728  | 1 | 0.0084922 | 11 | Psmc1     |
| -0.91933703  | 1 | 0.0084932 | 11 | Rps15a    |
| -1.60464174  | 1 | 0.0084957 | 11 | Usp19     |
| 0.293514783  | 1 | 0.0085025 | 11 | Herpud1   |
| 0.629448118  | 1 | 0.008504  | 11 | Napg      |
| -1.6847841   | 1 | 0.0085201 | 11 | Pacsin2   |
| 0.34006119   | 1 | 0.0085501 | 11 | S100a13   |
| -1.726269228 | 1 | 0.0085584 | 11 | Fam213b   |
| -1.522095902 | 1 | 0.00861   | 11 | Kdm1a     |
| -1.590698834 | 1 | 0.0086121 | 11 | Dusp22    |
| -1.45649862  | 1 | 0.0086149 | 11 | Fam175b   |
| 0.26775152   | 1 | 0.0086206 | 11 | Itpril2   |
| -0.510928363 | 1 | 0.0087005 | 11 | Rpl14-ps1 |
| 0.43035833   | 1 | 0.0087148 | 11 | Ercc2     |
| -1.721740781 | 1 | 0.0087299 | 11 | Ctsk      |
| 0.336634193  | 1 | 0.0087347 | 11 | Cd151     |
| 0.322013245  | 1 | 0.0087368 | 11 | Trip12    |
| 0.369851562  | 1 | 0.0088033 | 11 | Ino80e    |
| -1.199293093 | 1 | 0.0088347 | 11 | Tuba1b    |
| 0.334468681  | 1 | 0.0088357 | 11 | Lrrc59    |
| -1.534136737 | 1 | 0.0088379 | 11 | Taf7      |
| 0.57441747   | 1 | 0.008839  | 11 | Cox7a2    |
| -1.628395826 | 1 | 0.0088674 | 11 | Fam63a    |
| -1.520841984 | 1 | 0.0088805 | 11 | Wdr91     |
| -1.478118699 | 1 | 0.0088829 | 11 | Mrpl4     |
| -1.823661415 | 1 | 0.0088872 | 11 | Cyp4f18   |
| -1.716548961 | 1 | 0.0088891 | 11 | Tnfaip8l2 |
| -1.74801338  | 1 | 0.0089454 | 11 | Pih1d1    |
| -1.584046491 | 1 | 0.0090014 | 11 | Ero1lb    |
| 0.532886729  | 1 | 0.0090139 | 11 | Mrpl53    |
| 0.480530476  | 1 | 0.0090244 | 11 | Ctu2      |
| -1.552943506 | 1 | 0.0091302 | 11 | Pds5a     |
| -1.516012894 | 1 | 0.0092551 | 11 | Cln3      |
| -1.650497199 | 1 | 0.0092588 | 11 | Parp2     |
| -1.653431904 | 1 | 0.0092644 | 11 | Sifn8     |
| -1.427637127 | 1 | 0.0092659 | 11 | Ctdsp2    |
| -0.933296579 | 1 | 0.0093222 | 11 | Vapa      |
| -1.696507767 | 1 | 0.0093579 | 11 | Akap9     |
| 0.293909248  | 1 | 0.0093828 | 11 | Agtpbp1   |
| -1.530622521 | 1 | 0.0093884 | 11 | Mkks      |
| 0.467306578  | 1 | 0.0094294 | 11 | Rpf1      |
| 0.385865575  | 1 | 0.0094988 | 11 | Taok3     |
| -1.715081642 | 1 | 0.0095825 | 11 | Dip2b     |
| 0.353425219  | 1 | 0.0096166 | 11 | Polr2e    |
| -1.079946336 | 1 | 0.0096221 | 11 | Slc25a5   |
| -1.525223837 | 1 | 0.0096731 | 11 | Wipf2     |
| -1.503971065 | 1 | 0.0096854 | 11 | Nbeal1    |
| 0.395488001  | 1 | 0.009694  | 11 | Bach2     |
| 0.516937586  | 1 | 0.0097572 | 11 | Capza1    |
| -1.664481741 | 1 | 0.0097847 | 11 | Utp3      |
| -1.340994044 | 1 | 0.0098119 | 11 | Zfp36l2   |

|              |   |           |    |       |
|--------------|---|-----------|----|-------|
| 0.442713373  | 1 | 0.0098874 | 11 | Grn   |
| 0.270172214  | 1 | 0.0098947 | 11 | Sfpq  |
| -1.605719958 | 1 | 0.0099076 | 11 | Lst1  |
| 0.472564539  | 1 | 0.0099581 | 11 | Hbegf |
| -1.719108442 | 1 | 0.0099703 | 11 | Tbrg1 |
| -0.930964658 | 1 | 0.0099748 | 11 | Cox6c |
| 0.59975271   | 1 | 0.0099866 | 11 | Emc4  |
